# Supplementary material for: Systematic Analysis and Biomarker Study for Alzheimer’s Disease
Source: Sci Rep. 2018 Nov 26;8:17394. doi: 10.1038/s41598-018-35789-3 (PMC6255913; doi:10.1038/s41598-018-35789-3)
Supplement: Supplementary file 2 — Supplementary Table 2 [file 41598_2018_35789_MOESM2_ESM.xlsx]

## Sheet: gse63060-61.blood.unique.DEG.IG
			Blood AD					Blood MCI					Brain meta-analysis in PFC region									IGAP MAGMA
Entrez_Gene_ID	Symbol	Protein_Product	FC.AD	AveExpr	t	P.Value	BH.pval	FC.MCI	AveExpr	t	P.Value	BH.pval	metaZscore	metaPval	effect	Pval.adj	BF.Pval	maxFC	avgFC	Braak.stage.r.coefficient	Frontal.atrophy.r.coefficient	CHR	START	STOP	NSNPS	NPARAM	N	ZSTAT	P	Strand	BF.pval	ageing	AD.risk
51258	MRPL51	NP_057581.2	0.71	8.16	-16.16	1.33e-48	3.04e-44	0.74	8.16	-12.21	1.31e-30	1.49e-26	0.22	0.827036	-+++--	0.877413	1	0.9	0.99			12	6581316	6622471	157	11	54162	1.63	0.051351	-	1
4694	NDUFA1	NP_004532.1	0.52	9.49	-15.92	2.06e-47	2.34e-43	0.56	9.49	-12.52	6.13e-32	1.4e-27	-3.02	0.00249076	-----+	0.00694732	1	0.51	0.86		-0.4583
6166	RPL36AL	NP_000992.1	0.63	11.24	-15.15	9.47e-44	7.18e-40	0.67	10.22	-10.42	2.19e-23	1.39e-20	1.23	0.218659	-++--+	0.313722	1	1.34	1.05			14	50065406	50107403	109	8	54162	-1.8	0.96402	-	1
4725	NDUFS5	NP_004543.1	0.58	8.41	-14.72	9.17e-42	5.22e-38	0.63	8.41	-11.21	1.81e-26	4.58e-23	-3.27	0.00107939	-----+	0.00335243	1	0.45	0.85			1	39471967	39520308	158	11	54162	-1.27	0.89714	+	1
401206	LOC401206	XP_376420.1	0.65	12.75	-14.33	5.66e-40	1.94e-36	0.71	12.75	-10.34	4.61e-23	2.56e-20
646200	LOC646200	XP_935553.1	0.56	9.89	-14.33	5.96e-40	1.94e-36	0.6	9.89	-11.24	1.33e-26	4.31e-23
6230	RPS25	NP_001019.1	0.64	12.57	-14.12	5.25e-39	1.49e-35	0.68	12.57	-10.64	3.25e-24	3.24e-21	5.14	2.82e-07	++++++	2.92e-06	0.00663804	1.42	1.16			11	118866422	118909057	89	7	54162	1.2	0.11452	-	1
521	ATP5I	NP_009031.1	0.64	9.35	-13.98	2.4e-38	6.06e-35	0.67	9.35	-11.11	4.51e-26	1.03e-22	-1.67	0.0951309	++?--+	0.157072	1	1.1	1.02			4	646225	688127	67	8	54162	0.08	0.468	-	1
10063	COX17	NP_005685.1	0.73	8.61	-13.89	5.69e-38	1.29e-34	0.75	8.61	-11.3	7.45e-27	2.82e-23	2.17	0.030174	-+++-+	0.0596033	1	0.65	0.97			3	119368372	119416243	176	15	54162	0.35	0.3633	-	1
7388	UQCRH	NP_005995.2	0.62	9.21	-13.67	5.84e-37	1.19e-33	0.66	9.21	-10.54	7.68e-24	5.82e-21	-2.98	0.00287406	???--?	0.00787363	1	0.82	0.88	-0.6292	-0.5007	1	46749324	46802448	62	13	54162	-1.6	0.94472	+	1
7979	SHFM1	NP_006295.1	0.58	7.93	-13.66	6.3e-37	1.19e-33	0.61	7.93	-11.07	6.29e-26	1.19e-22	-3.72	0.000196364	-----+	0.000769434	1	0.69	0.89			7	96298079	96359203	103	14	54162	1.09	0.13698	-	1
6119	RPA3	NP_002938.1	0.75	7.76	-13.62	9.36e-37	1.64e-33	0.76	7.76	-11.73	1.33e-28	1.01e-24	-5.38	7.4e-08	--?---	9.79e-07	0.00174013	0.53	0.8		-0.4558	7	7656347	7778238	456	36	54162	-0.89	0.81224	-	1
1069	CETN2	NP_004335.1	0.82	8.64	-13.41	8.47e-36	1.38e-32	0.86	8.64	-8.94	5.43e-18	6.84e-16	-1.93	0.054078	------	0.0976858	1	0.77	0.93
539	ATP5O	NP_001688.1	0.64	9.05	-12.65	1.77e-32	2.69e-29	0.65	9.05	-10.93	2.39e-25	3.88e-22	-2.51	0.012144	-----+	0.0273443	1	0.6	0.9		-0.4686	21	35255757	35308158	121	17	54162	-0.08	0.53384	-	1
529	ATP6V1E1	NP_001034456.1	0.78	9.87	-12.5	7.94e-32	1.13e-28	0.79	9.87	-10.62	3.91e-24	3.66e-21	-5.6	2.12e-08	--?---	3.53e-07	0.000498734	0.44	0.76	-0.6625	-0.5629	22	18054902	18131588	268	14	54162	-0.06	0.52373	-	1
56943	ENY2	NP_064574.1	0.67	7.67	-12.44	1.44e-31	1.93e-28	0.66	7.67	-11.41	2.87e-27	1.63e-23	-5.13	2.95e-07	------	3.03e-06	0.00694809	0.54	0.84			8	110326552	110378189	106	19	54162	-1.02	0.84597	+	1
3336	HSPE1	NP_002148.1	0.69	7.79	-12.42	1.7e-31	2.15e-28	0.69	7.79	-11.09	5.58e-26	1.15e-22	1.65	0.0984987	-++-+-	0.161781	1	1.16	1.04			2	198344721	198388187	33	4	54162	-0.3	0.61915	+	1	Yes
653658	LOC653658	XP_944780.2	0.55	9.48	-12.41	1.95e-31	2.34e-28	0.61	9.48	-8.95	5e-18	6.41e-16
54460	MRPS21	NP_061870.1	0.73	8.03	-12.36	3.24e-31	3.68e-28	0.73	8.03	-10.92	2.58e-25	3.92e-22	-5.41	6.35e-08	------	8.7e-07	0.00149343	0.85	0.91		-0.5225	1	150246262	150301414	128	11	54162	-1.32	0.90673	+	1
84154	BXDC1	NP_115570.1	0.8	7.44	-12.29	6.05e-31	6.56e-28	0.82	7.44	-10.06	5.17e-22	2.1e-19	-0.23	0.817016	--+++-	0.869659	1	0.68	0.96			6	111283274	111367299	383	18	54162	1.25	0.1064	+	1	Yes
6233	RPS27A	NP_002945.1	0.72	12.77	-12.27	7.55e-31	7.81e-28	0.7	9.89	-8.65	5.43e-17	5.47e-15	3.84	0.000123995	-++++-	0.000518592	1	0.89	1.02			2	55439039	55482989	101	18	54162	-0.07	0.52951	+	1
3301	DNAJA1	NP_001530.1	0.67	9.17	-12.18	1.71e-30	1.69e-27	0.68	9.17	-10.46	1.63e-23	1.12e-20	0.42	0.674173	-+?++-	0.756764	1	0.87	0.99		0.4339	9	33005209	33059905	221	11	54162	-0.78	0.7811	+	1
654121	LOC654121	XP_947535.1	0.8	7.6	-12.18	1.83e-30	1.74e-27	0.82	7.6	-9.87	2.72e-21	8.36e-19
51382	ATP6V1D	NP_057078.1	0.76	8.44	-12.16	2.14e-30	1.95e-27	0.75	8.44	-10.86	4.32e-25	5.79e-22	-6.62	3.7e-11	------	2.13e-09	8.7e-07	0.47	0.77	-0.6431	-0.5327	14	67784581	67846720	174	14	54162	-0.3	0.61905	-	1
51506	UFC1	NP_057490.1	0.79	8.73	-12.15	2.46e-30	2.15e-27	0.84	8.73	-8.1	3.4e-15	2.31e-13	1	0.316966	++++--	0.423425	1	1.28	1.04			1	161103534	161148646	56	8	54162	1.41	0.079606	+	1
168537	GIMAP7	NP_694968.1	0.66	9.91	-12.11	3.51e-30	2.96e-27	0.72	9.91	-8.67	4.72e-17	4.88e-15	3.56	0.000374509	++?+++	0.00134599	1	1.61	1.19		0.4741	7	150191945	150238161	190	20	54162	-1.24	0.89238	+	1	Yes
51373	MRPS17	NP_057053.1	0.88	7.18	-12.06	5.58e-30	4.53e-27	0.89	7.18	-10.26	9.47e-23	4.9e-20	-1.55	0.121639	--+---	0.193389	1	0.63	0.91			7	55999611	56043034	101	17	54162	-0.85	0.80243	+	1
5052	PRDX1	NP_859047.1	0.79	8.91	-12	1.02e-29	8.03e-27	0.8	8.91	-9.97	1.08e-21	3.79e-19	3.7	0.000211992	-+?+++	0.00082449	1	0.69	0.99		0.4872	1	45956707	46008562	104	7	54162	0.43	0.33527	-	1
2959	GTF2B	NP_001505.1	0.78	7.72	-11.83	5.15e-29	3.9e-26	0.78	7.72	-10.41	2.38e-23	1.46e-20	-2.17	0.030271	-+?---	0.0597597	1	0.62	0.89			1	89298321	89377301	211	15	54162	-0.87	0.8076	-	1
522	ATP5J	NP_001003701.1	0.64	8.51	-11.8	6.77e-29	4.97e-26	0.64	8.59	-10.65	2.79e-24	3.03e-21	-5.93	2.95e-09	--?---	7.22e-08	6.94e-05	0.7	0.86	-0.69	-0.5419	21	27076791	27127965	72	10	54162	0.59	0.27842	-	1
653505	LOC653505	XP_932860.1	0.77	8.34	-11.77	8.89e-29	6.13e-26	0.76	8.34	-10.61	4.19e-24	3.66e-21
5684	PSMA3	NP_687033.1	0.76	7.55	-11.77	9.25e-29	6.19e-26	0.76	7.55	-10.65	2.8e-24	3.03e-21	-4.41	1.01e-05	------	6.05e-05	0.238023	0.4	0.79			14	58691523	58758727	80	10	54162	1.77	0.038067	+	1
6902	TBCA	NP_004598.1	0.71	9	-11.71	1.72e-28	1.12e-25	0.7	9	-10.91	2.77e-25	3.94e-22	-2.57	0.010224	+-?--+	0.0235415	1	0.93	0.99			5	76966995	77092185	378	17	54162	0.55	0.29172	-	1
51503	CWC15	NP_057487.2	0.81	7.79	-11.7	1.88e-28	1.19e-25	0.81	7.79	-10.57	5.77e-24	4.69e-21	-3	0.00269904	--?---	0.00744438	1	0.9	0.95			11	94675787	94726776	122	18	54162	0.51	0.30558	-	1
9553	MRPL33	NP_663303.1	0.8	9.24	-11.59	5.29e-28	3.22e-25	0.78	9.24	-11.31	7.26e-27	2.82e-23	-1.1	0.271572	-+-+--	0.37428	1	0.86	0.95			2	27974584	28022608	46	7	54162	0.38	0.35366	+	1
29889	GNL2	NP_037417.1	0.84	7.75	-11.58	5.38e-28	3.22e-25	0.84	7.75	-10.2	1.49e-22	7.04e-20	-2.78	0.00540762	--+---	0.0136058	1	0.72	0.93			1	38012413	38081586	140	17	54162	0.79	0.2135	-	1
6741	SSB	NP_003133.1	0.78	7.61	-11.56	6.94e-28	4.05e-25	0.77	7.61	-10.72	1.51e-24	1.81e-21	-0.64	0.519269	+++--+	0.622498	1	1.22	1.05			2	170635322	170688574	179	22	54162	0.33	0.37133	+	1
199	AIF1	NP_001614.3	0.67	9.5	-11.54	8.19e-28	4.54e-25	0.67	9.5	-10.14	2.48e-22	1.09e-19	4.92	8.54e-07	?+++++	7.39e-06	0.0200829	1.37	1.23			6	31562969	31604798	153	32	54162	1.73	0.041871	+	1
51371	POMP	NP_057016.1	0.82	9.17	-11.46	1.81e-27	9.59e-25	0.82	9.17	-9.87	2.56e-21	7.97e-19	-3.86	0.000113773	-+----	0.000481058	1	0.64	0.89			13	29213141	29273094	129	15	54162	-0.74	0.76983	+	1
404672	GTF2H5	NP_997001.1	0.8	8.05	-11.45	1.94e-27	1e-24	0.82	8.05	-9.01	3.12e-18	4.38e-16	-4.71	2.5e-06	--?---	1.84e-05	0.0587118	0.67	0.84		-0.4797	6	158569379	158640376	206	20	54162	0.3	0.38304	+	1
51023	MRPS18C	NP_057151.1	0.69	7.71	-11.43	2.34e-27	1.18e-24	0.69	7.71	-10.35	4.15e-23	2.36e-20	-7.11	1.2e-12	------	1.44e-10	2.82e-08	0.63	0.82	-0.6087	-0.5037	4	84357085	84402929	73	5	54162	0.04	0.48467	+	1
7381	UQCRB	NP_006285.1	0.81	6.86	-11.37	3.93e-27	1.94e-24	0.81	6.86	-10.14	2.67e-22	1.15e-19	0.23	0.81437	-+-++-	0.867377	1	0.56	0.9			8	97218904	97267862	82	10	54162	1.85	0.031968	-	1
440567	LOC440567	NP_001083060.1	0.7	8.97	-11.37	4.14e-27	2e-24	0.71	8.97	-9.55	3.94e-20	9.15e-18	-3.43	0.000600592	???--?	0.00201942	1	0.84	0.89			1	16113657	16154194	180	13	54162	0.29	0.38669	-	1
54543	TOMM7	NP_061932.1	0.53	9.99	-11.36	4.34e-27	2.01e-24	0.54	9.75	-9.75	7.29e-21	1.91e-18	2.1	0.036161	???++?	0.0695991	1	1.05	1.03			7	22832251	22882471	210	23	54162	-0.44	0.66871	-	1
6728	SRP19	NP_003126.1	0.82	7.59	-11.35	4.67e-27	2.13e-24	0.82	7.59	-10.23	1.15e-22	5.8e-20	-4.59	4.46e-06	-+---+	3e-05	0.105022	0.75	0.89		-0.479	5	112176885	112248776	208	15	54162	0.52	0.30012	+	1
388720	LOC388720	XP_945786.1	0.72	12.9	-11.34	5.44e-27	2.43e-24	0.78	12.9	-7.6	1.23e-13	5.61e-12
54556	ING3	NP_061944.2	0.82	7.38	-11.33	5.94e-27	2.6e-24	0.81	7.38	-10.95	1.96e-25	3.43e-22	-2.66	0.00775229	--?---	0.0185278	1	0.81	0.92			7	120570817	120635711	98	9	54162	-0.3	0.61637	+	1
10094	ARPC3	NP_005710.1	0.74	10.88	-11.31	6.82e-27	2.93e-24	0.73	10.88	-10.47	1.43e-23	1.02e-20	-1.54	0.124143	-+---+	0.196613	1	0.76	0.95			12	110852695	110908222	70	8	54162	-0.44	0.66913	-	1
51019	CCDC53	NP_057137.1	0.79	7.85	-11.27	1.04e-26	4.4e-24	0.79	7.85	-9.93	1.57e-21	5.06e-19	-4.22	2.41e-05	--?---	0.000126304	0.567737	0.79	0.9			12	102386717	102475902	166	23	54162	-0.07	0.52616	-	1
1622	DBI	NP_001073332.1	0.6	8.22	-11.16	2.74e-26	1.09e-23	0.58	8.22	-10.58	5.47e-24	4.61e-21	6.68	2.34e-11	++?++-	1.48e-09	5.49e-07	1.51	1.21	0.6913	0.5402	2	120104504	120150122	153	16	54162	-0.16	0.56172	+	1
25983	NGDN	NP_001036100.1	0.81	7.6	-11.15	2.96e-26	1.16e-23	0.81	7.6	-9.66	1.49e-20	3.6e-18	-1.24	0.214488	-+?---	0.308641	1	0.77	0.94			14	23918898	23967402	106	7	54162	-0.34	0.63463	+	1	Yes
6229	RPS24	NP_148982.1	0.49	9.41	-11.14	3.35e-26	1.29e-23	0.5	9.41	-9.52	4.99e-20	1.11e-17	4.7	2.61e-06	++?+++	1.9e-05	0.0614098	1.12	1.06			10	79773518	79836571	65	8	54162	1.21	0.11295	+	1
221443	C6orf130	NP_659500.1	0.86	7.59	-11.13	3.71e-26	1.41e-23	0.86	7.59	-9.73	8.64e-21	2.18e-18	-3.04	0.00233211	------	0.00656865	1	0.67	0.9			6	41014526	41060207	99	10	54162	1.43	0.076485	-	1
23658	LSM5	NP_036454.1	0.76	7.88	-11.11	4.48e-26	1.67e-23	0.76	7.88	-9.78	5.49e-21	1.49e-18	-4.03	5.64e-05	------	0.000263289	1	0.58	0.87			7	32504945	32554870	171	17	54162	3.12	0.0008969	-	1	Yes
7347	UCHL3	NP_005993.1	0.86	7.21	-11.04	8.75e-26	3.21e-23	0.85	7.21	-10.03	6.65e-22	2.4e-19	-2.98	0.00285468	---+--	0.00782509	1	0.65	0.87			13	76103616	76200156	272	16	54162	-1.04	0.85059	+	1
84324	CIP29	NP_149073.1	0.69	7.89	-11.02	9.89e-26	3.46e-23	0.69	7.89	-9.77	5.91e-21	1.56e-18	-1.23	0.218555	++?---	0.313592	1	1.16	1.03			12	56126247	56231540	75	10	54162	0.45	0.3276	-	1
51650	MRPS33	NP_057155.1	0.8	7.35	-10.97	1.63e-25	5.61e-23	0.81	7.35	-9.19	7.53e-19	1.21e-16	-3.44	0.000591164	--?---	0.00199285	1	0.71	0.88			7	140685961	140734781	90	9	54162	-0.54	0.70378	-	1	Yes
642989	LOC642989	XP_931463.1	0.7	7.5	-10.97	1.67e-25	5.66e-23	0.71	7.5	-9.39	1.42e-19	2.86e-17
6727	SRP14	NP_003125.2	0.72	9.54	-10.95	1.95e-25	6.53e-23	0.73	9.54	-9.34	2.19e-19	4.02e-17	0.85	0.397417	+++-++	0.506183	1	1.23	1.05			15	40307891	40351389	84	15	54162	0.04	0.48251	-	1
27258	LSM3	NP_055278.1	0.66	7.51	-10.95	1.98e-25	6.53e-23	0.65	7.51	-10.04	6.34e-22	2.39e-19	-5.44	5.43e-08	------	7.64e-07	0.0012776	0.69	0.87			3	14200228	14259869	121	21	54162	0.19	0.42625	+	1
29093	MRPL22	NP_001014990.1	0.78	7.52	-10.89	3.24e-25	1.05e-22	0.77	7.52	-10.2	1.48e-22	7.04e-20	-1.28	0.200034	-+?---	0.291352	1	0.83	0.95			5	154300633	154368971	130	15	54162	-0.59	0.72224	+	1
6629	SNRPB2	NP_937863.1	0.79	8.55	-10.87	4.14e-25	1.33e-22	0.78	8.55	-10.26	9.35e-23	4.9e-20	-3.84	0.00012126	------	0.000508783	1	0.76	0.91			20	16690609	16742417	168	42	54162	-1.93	0.97316	+	1
153527	ZMAT2	NP_653324.1	0.73	8.73	-10.86	4.34e-25	1.37e-22	0.77	8.73	-7.96	9.12e-15	5.55e-13	-5.19	2.15e-07	------	2.34e-06	0.00505906	0.53	0.82	-0.637	-0.4788	5	140058265	140106248	80	6	54162	3.26	0.00054805	+	1
103910	MRLC2	NP_291024.1	0.79	11.05	-10.8	7.86e-25	2.42e-22	0.78	11.05	-10.05	5.46e-22	2.14e-19	-3.4	0.000670741	------	0.00222571	1	0.79	0.92		-0.4445	18	3242111	3298282	190	16	54162	-0.31	0.62258	+	1
4709	NDUFB3	NP_002482.1	0.64	8.12	-10.76	1.03e-24	3.13e-22	0.62	8.12	-10.26	9.05e-23	4.9e-20	-2.76	0.00586075	-+?---	0.0145714	1	0.61	0.84			2	201916462	201970473	95	9	54162	0.12	0.45301	+	1
3476	IGBP1	NP_001542.1	0.82	8	-10.75	1.17e-24	3.52e-22	0.82	8	-9.34	2.19e-19	4.02e-17	-2.85	0.00438307	--?---	0.0113408	1	0.79	0.92
54148	MRPL39	NP_059142.2	0.86	7.34	-10.74	1.28e-24	3.72e-22	0.86	7.34	-9.84	3.31e-21	9.91e-19	-2.15	0.0317918	-+?---	0.0623176	1	0.4	0.83			21	26937968	26999801	193	11	54162	1.45	0.073405	-	1
2171	FABP5	NP_001435.1	0.91	6.86	-10.67	2.34e-24	6.65e-22	0.91	6.86	-10.08	4.2e-22	1.74e-19	-0.22	0.826649	??+-+-	0.877118	1	1.09	0.99	-0.5447	-0.4836	8	82172718	82217012	52	7	54162	0.75	0.22543	+	1
51651	PTRH2	NP_057161.1	0.83	7.47	-10.66	2.58e-24	7.24e-22	0.81	7.47	-10.61	4.07e-24	3.66e-21	-3.67	0.000239493	--?---	0.000916303	1	0.65	0.87			17	57754667	57804856	55	8	54162	-2.08	0.9813	-	1
285900	LOC285900	XP_931716.1	0.69	9.64	-10.65	2.87e-24	7.96e-22	0.71	9.64	-8.72	3.21e-17	3.56e-15
341457	LOC341457	XP_292085.2	0.75	11.61	-10.65	2.9e-24	7.96e-22	0.76	11.61	-8.94	5.44e-18	6.84e-16	4.67	2.96e-06	???++?	2.11e-05	0.0695683	1.17	1.12
8087	FXR1	NP_005078.2	0.87	7.24	-10.63	3.51e-24	9.51e-22	0.88	7.24	-8.38	4.14e-16	3.36e-14	2.18	0.0290885	++?++-	0.057789	1	2.88	1.29			3	180610096	180720541	155	12	54162	0.9	0.18508	+	1	Yes
6647	SOD1	NP_000445.1	0.78	9.7	-10.56	6.54e-24	1.75e-21	0.8	9.7	-8.48	1.97e-16	1.75e-14	-3.69	0.000226483	-+?--+	0.000872913	1	0.6	0.86			21	33011935	33061244	101	14	54162	2.19	0.014304	+	1
11335	CBX3	NP_057671.2	0.81	7.62	-10.52	8.94e-24	2.36e-21	0.83	7.62	-8.44	2.72e-16	2.31e-14	-0.22	0.827271	++--+-	0.877504	1	1.75	1.08			7	26220831	26273227	93	11	54162	3.97	3.53e-05	+	0.643484
55299	BXDC2	NP_060791.3	0.84	7.51	-10.52	9.07e-24	2.37e-21	0.85	7.51	-9.01	3.14e-18	4.38e-16	-3.71	0.000209246	--?---	0.000814756	1	0.7	0.89			5	34895820	34945787	85	16	54162	-0.45	0.67409	+	1	Yes
51372	CCDC72	NP_057017.1	0.62	8.16	-10.51	9.74e-24	2.49e-21	0.6	8.16	-9.83	3.82e-21	1.13e-18	-0.57	0.568558	+-?-+-	0.666908	1	1.08	1.02			3	48461686	48505537	52	4	54162	-0.58	0.71984	+	1
10412	TINP1	NP_055701.1	0.73	9.09	-10.48	1.32e-23	3.33e-21	0.72	9.09	-9.75	7.44e-21	1.92e-18	-1.52	0.127795	-+----	0.20157	1	0.77	0.94			5	74042816	74092737	97	10	54162	0.78	0.218	+	1
5701	PSMC2	NP_002794.1	0.78	8.35	-10.46	1.56e-23	3.9e-21	0.77	8.35	-9.52	5.09e-20	1.12e-17	-2.81	0.00489379	--+---	0.0124771	1	0.65	0.89			7	102964852	103029842	79	11	54162	0.28	0.38958	+	1
6161	RPL32	NP_001007075.1	0.81	12.52	-10.46	1.6e-23	3.97e-21	0.83	12.52	-8.01	6.4e-15	4.03e-13	2.4	0.0164071	++?+++	0.0353663	1	1.26	1.08			3	12856444	12903081	138	14	54162	-0.53	0.70128	-	1
6154	RPL26	NP_000978.1	0.52	8.01	-10.44	1.93e-23	4.72e-21	0.52	8.01	-9.16	9.65e-19	1.49e-16	3.49	0.000485453	???+++	0.00168154	1	1.12	1.08			17	8260834	8306565	88	13	54162	1.01	0.15622	-	1
84268	RPAIN	NP_001028174.1	0.83	7.82	-10.43	2.05e-23	4.97e-21	0.82	7.82	-9.72	9.14e-21	2.29e-18	-5.89	3.89e-09	--?---	8.86e-08	9.16e-05	0.57	0.84			17	5302961	5356340	190	12	54162	2.68	0.003722	+	1	Yes
4724	NDUFS4	NP_002486.1	0.72	7.58	-10.42	2.21e-23	5.3e-21	0.72	7.58	-9.3	3.1e-19	5.47e-17	-4.25	2.17e-05	+-----	0.000115335	0.509779	1.33	0.94	-0.6379	-0.4872	5	52836464	52999171	453	24	54162	0.81	0.20936	+	1
51318	MRPL35	NP_663619.1	0.81	7.23	-10.42	2.24e-23	5.32e-21	0.79	7.23	-10.4	2.71e-23	1.62e-20	-4.24	2.25e-05	-+----	0.000119166	0.529694	0.78	0.92			2	86406478	86460913	160	12	54162	-0.27	0.60494	+	1	Yes
6742	SSBP1	NP_003134.1	0.84	8.78	-10.4	2.66e-23	6.2e-21	0.84	8.78	-9.3	3.03e-19	5.38e-17	-2.26	0.0235603	-++--?	0.0483536	1	0.55	0.9			7	141418121	141470288	81	3	54162	1.72	0.042298	+	1
6128	RPL6	NP_001019833.1	0.77	12.51	-10.4	2.68e-23	6.2e-21	0.79	12.51	-8.3	7.43e-16	5.68e-14	-0.43	0.667085	++?---	0.750957	1	1.08	1.01			12	112822994	112876647	45	10	54162	1.04	0.14829	-	1
51574	LARP7	NP_056269.1	0.79	7.32	-10.37	3.39e-23	7.72e-21	0.78	7.32	-9.61	2.27e-20	5.39e-18	4.36	1.27e-05	++?++-	7.3e-05	0.29939	1.34	1.15	0.6489	0.5995	4	113538120	113598748	115	20	54162	-1.14	0.87372	+	1
84298	C12orf31	NP_115714.1	0.88	7.22	-10.36	3.81e-23	8.58e-21	0.89	7.22	-8.34	5.85e-16	4.61e-14	2.12	0.0338197	++++++	0.0657341	1	1.26	1.08			12	66496849	66544533	92	9	54162	1.28	0.099684	-	1
10312	TCIRG1	NP_006044.1	1.26	9.91	10.35	4.31e-23	9.61e-21	1.24	9.91	8.58	9.42e-17	8.9e-15	7.39	1.49e-13	?+++++	3e-11	3.51e-09	1.58	1.29	0.6656	0.537	11	67786462	67838366	86	14	54162	-0.06	0.52318	+	1	Yes
7295	TXN	NP_003320.2	0.66	8.57	-10.34	4.38e-23	9.69e-21	0.63	8.57	-10.45	1.79e-23	1.2e-20	-5.16	2.45e-07	--?--+	2.6e-06	0.00577574	0.47	0.81	-0.6598	-0.5311	9	112986092	113038920	189	35	54162	-1.02	0.8463	-	1
3320	HSP90AA1	NP_001017963.2	0.69	8.5	-10.32	5.32e-23	1.15e-20	0.71	8.5	-8.79	1.72e-17	2.02e-15	1.29	0.198698	++?-+-	0.289838	1	1.56	1.13			14	102527075	102626086	203	20	54162	-1.18	0.88018	-	1
644863	LOC644863	XP_933048.1	0.74	9.41	-10.29	6.83e-23	1.44e-20	0.74	9.41	-8.93	5.86e-18	7.29e-16
4830	NME1	NP_000260.1	0.8	7.94	-10.29	7.3e-23	1.52e-20	0.8	7.94	-9.22	5.65e-19	9.46e-17	-6.42	1.38e-10	------	6.18e-09	3.25e-06	0.31	0.7	-0.6796	-0.5841	17	49210920	49259450	151	19	54162	0.63	0.26557	+	1	Yes
6637	SNRPG	NP_003087.1	0.61	8.53	-10.27	8.42e-23	1.74e-20	0.59	8.53	-9.82	4.1e-21	1.19e-18	1.2	0.228864	++++--	0.325526	1	1.15	1.04	-0.473		2	70488510	70540869	85	6	54162	0.92	0.17945	-	1
6645	SNTB2	NP_006741.1	1.18	8.55	10.26	9.19e-23	1.88e-20	1.2	8.55	10.15	2.38e-22	1.06e-19	3.04	0.00236303	++?++-	0.00664152	1	1.49	1.12	0.5182	0.459	16	69201050	69362955	302	18	54162	0.11	0.45757	+	1	Yes
731365	LOC731365		0.71	10.43	-10.25	1.04e-22	2.1e-20	0.74	10.43	-8	7.01e-15	4.36e-13
29081	METTL5	NP_054887.2	0.82	7.33	-10.24	1.11e-22	2.23e-20	0.82	7.33	-9.39	1.5e-19	2.97e-17	5.33	9.85e-08	++?++-	1.23e-06	0.00231773	1.22	1.12			2	170648267	170701439	161	23	54162	0.38	0.35231	-	1
219402	MTIF3	NP_690876.2	0.85	7.65	-10.19	1.61e-22	3.17e-20	0.86	7.65	-8.66	4.93e-17	5.03e-15	0.71	0.478267	-+-+--	0.584634	1	1.1	1			13	27989776	28044739	190	20	54162	0.58	0.27957	-	1
84661	DPY30	NP_115963.1	0.74	8.08	-10.19	1.66e-22	3.22e-20	0.72	8.08	-9.93	1.58e-21	5.06e-19	-2.97	0.00297818	-+?---	0.00811823	1	0.56	0.87			2	32225856	32284890	108	14	54162	-0.48	0.68388	-	1
23256	SCFD1	NP_057190.2	0.87	8.15	-10.18	1.81e-22	3.5e-20	0.86	8.15	-9.81	4.49e-21	1.29e-18	1.17	0.241476	+-?+--	0.340092	1	1.61	1.08		-0.4171	14	31071460	31225034	332	24	54162	0.09	0.46441	+	1
81892	C14orf156	NP_112487.1	0.7	8.05	-10.17	1.92e-22	3.67e-20	0.7	8.05	-9.07	1.95e-18	2.82e-16	-2.6	0.00930259	------	0.0216852	1	0.34	0.8			14	78154414	78203941	175	21	54162	-0.21	0.58145	+	1
7297	TYK2	NP_003322.2	1.22	10.23	10.17	1.94e-22	3.69e-20	1.21	10.23	8.98	4.14e-18	5.48e-16	6.04	1.57e-09	++++++	4.39e-08	3.68e-05	1.22	1.13	0.6721	0.5098	19	10441204	10511248	165	25	54162	0.97	0.1652	-	1
6633	SNRPD2	NP_004588.1	0.68	10.14	-10.15	2.3e-22	4.32e-20	0.68	10.14	-8.84	1.17e-17	1.39e-15	-2.17	0.029708	-----+	0.0588112	1	1.08	0.99			19	46170712	46215569	83	15	54162	3.79	7.52e-05	-	1
3945	LDHB	NP_002291.1	0.74	8.71	-10.14	2.55e-22	4.75e-20	0.79	8.71	-6.81	2.43e-11	6.43e-10	-2.59	0.00961246	--?---	0.0223014	1	0.6	0.88			12	21768275	21830789	102	4	54162	-0.91	0.8175	-	1	Yes
515	ATP5F1	NP_001679.2	0.76	9.46	-10.14	2.65e-22	4.9e-20	0.72	9.46	-10.75	1.2e-24	1.52e-21	-5.37	8.09e-08	--?---	1.06e-06	0.00190447	0.58	0.81	-0.6147	-0.4801	1	111971467	112024540	96	11	54162	0.81	0.20995	+	1
22826	DNAJC8	NP_055095.2	0.82	9.6	-10.13	2.8e-22	5.13e-20	0.83	9.6	-8.04	5.35e-15	3.48e-13	-5.34	9.4e-08	--?---	1.19e-06	0.00221273	0.64	0.85	-0.5932		1	28506789	28579542	181	11	54162	-1.39	0.91778	-	1
653147	LOC653147	NP_001087230.1	0.8	7.11	-10.12	3.06e-22	5.55e-20	0.78	7.11	-10.03	6.51e-22	2.39e-19
51668	C1orf41	NP_057210.1	0.82	7.02	-10.12	3.08e-22	5.55e-20	0.8	7.02	-10.13	2.87e-22	1.21e-19	-3.66	0.000250236	-----+	0.000951526	1	0.68	0.91			1	54367234	54431975	104	9	54162	-1.04	0.8498	-	1
51241	C14orf112	NP_057552.1	0.77	7.28	-10.1	3.66e-22	6.56e-20	0.76	7.28	-9.54	4.31e-20	9.91e-18	-5	5.75e-07	--?--?	5.31e-06	0.0135334	0.69	0.84			14	70771798	70846448	240	23	54162	-0.47	0.67916	-	1
9482	STX8	NP_004844.1	0.86	7.47	-10.08	4.43e-22	7.88e-20	0.87	7.47	-8.75	2.39e-17	2.74e-15	-2.28	0.0228847	-++---	0.0471678	1	0.53	0.89			17	9133788	9499275	876	103	54162	-1.02	0.84586	-	1
2958	GTF2A2	NP_004483.1	0.88	8.74	-10.07	4.56e-22	8.05e-20	0.86	8.74	-10.64	3.27e-24	3.24e-21	-2.15	0.0317147	-++---	0.0621977	1	0.87	0.96			15	59910261	59969737	184	9	54162	0.93	0.1773	-	1
648000	LOC648000	XP_371757.2	0.51	9.52	-10.07	4.64e-22	8.13e-20	0.52	9.52	-8.58	9.42e-17	8.9e-15
2079	ERH	NP_004441.1	0.77	7.92	-10.04	5.92e-22	1.02e-19	0.76	7.92	-9.45	9.08e-20	1.95e-17	-3.81	0.00013767	------	0.000567415	1	0.84	0.94			14	69826840	69885021	130	17	54162	-0.71	0.76018	-	1
9360	PPIG	NP_004783.2	0.83	7.13	-10.03	6.87e-22	1.18e-19	0.82	7.13	-9.3	2.95e-19	5.29e-17	2.52	0.011726	++?+--	0.0265191	1	2.72	1.26			2	170420850	170517916	304	15	54162	-0.3	0.61636	+	1
646483	LOC646483	XP_935644.1	0.72	9.94	-10.02	7.19e-22	1.21e-19	0.73	9.94	-8.48	1.95e-16	1.74e-14
25949	SYF2	NP_056299.1	0.81	8.92	-10.01	7.72e-22	1.29e-19	0.81	8.92	-8.9	7.39e-18	9.04e-16	-0.43	0.666312	-+?-+-	0.75034	1	0.86	0.96			1	25528767	25579013	14	5	54162	-2.25	0.98785	-	1
10671	DCTN6	NP_006562.1	0.86	7.07	-10.01	7.92e-22	1.32e-19	0.85	7.07	-10.06	5.3e-22	2.12e-19	-5.66	1.51e-08	------	2.69e-07	0.000354647	0.59	0.84			8	29993813	30061155	111	8	54162	-0.73	0.76737	+	1
3646	EIF3E	NP_001559.1	0.67	10.66	-9.97	1.11e-21	1.84e-19	0.68	10.66	-8.44	2.57e-16	2.19e-14	3.03	0.00245388	-+?++-	0.00686234	1	0.82	1			8	109193972	109280959	247	14	54162	1.38	0.083233	-	1	Yes
651064	LOC651064	XP_949582.1	0.78	7.22	-9.95	1.36e-21	2.22e-19	0.76	7.22	-9.66	1.54e-20	3.68e-18
8813	DPM1	NP_003850.1	0.76	7.85	-9.95	1.39e-21	2.25e-19	0.7	8.04	-10.19	1.75e-22	8.11e-20	-2.29	0.0223023	++----	0.0461462	1	0.89	0.96			20	49531404	49595081	88	11	54162	0.25	0.40248	-	1
4637	MYL6	NP_066299.2	0.73	12.11	-9.93	1.57e-21	2.52e-19	0.75	12.11	-8.07	4.35e-15	2.9e-13	3.98	6.78e-05	+-?+++	0.000308573	1	1.28	1.1			12	56532045	56575366	19	4	54162	0.31	0.37907	+	1	Yes
388962	BOLA3	NP_001030582.1	0.86	7.78	-9.93	1.57e-21	2.52e-19	0.87	7.78	-8.53	1.32e-16	1.21e-14	-5.14	2.74e-07	--?---	2.85e-06	0.00644125	0.64	0.86	-0.6989	-0.5948	2	74342528	74395039	131	16	54162	-0.75	0.77439	-	1
10987	COPS5	NP_006828.2	0.79	8.5	-9.93	1.62e-21	2.57e-19	0.77	8.5	-9.81	4.55e-21	1.3e-18	-4.14	3.53e-05	-+----	0.000175302	0.830582	0.47	0.82			8	67935314	67994562	62	5	54162	0.55	0.29025	-	1
1070	CETN3	NP_004356.2	0.85	6.91	-9.92	1.71e-21	2.7e-19	0.85	6.91	-8.67	4.66e-17	4.85e-15	0.59	0.552896	++?-+-	0.652832	1	0.86	1.02			5	89669528	89725611	53	9	54162	1.25	0.10501	-	1
10988	METAP2	NP_006829.1	0.79	8.1	-9.89	2.15e-21	3.37e-19	0.78	8.1	-9.1	1.48e-18	2.2e-16	2.97	0.00296916	+-?+++	0.00809551	1	1.23	1.05		0.4835	12	95847822	95929615	274	18	54162	1.48	0.069801	+	1	Yes
51639	SF3B14	NP_057131.1	0.73	8.24	-9.88	2.41e-21	3.75e-19	0.69	8.24	-10.35	4.14e-23	2.36e-20	-1.2	0.231822	-+?---	0.328858	1	0.8	0.95			2	24270454	24319314	132	11	54162	0.37	0.35679	-	1
5685	PSMA4	NP_002780.1	0.74	7.62	-9.85	2.99e-21	4.6e-19	0.66	8.13	-9.7	1.14e-20	2.83e-18	-1.01	0.311419	---+--	0.417532	1	0.85	0.93			15	78812747	78861562	118	8	54162	1.72	0.042592	+	1
651202	LOC651202	XP_945426.1	0.7	7.34	-9.85	3.13e-21	4.79e-19	0.72	7.34	-8.06	4.57e-15	3.03e-13
55339	WDR33	NP_001006623.1	0.87	7.95	-9.85	3.17e-21	4.82e-19	0.86	7.95	-9.38	1.57e-19	3.09e-17	-1.29	0.19873	???--?	0.289866	1	0.97	0.97			2	128441808	128588761	340	23	54162	0.6	0.27404	-	1
4116	MAGOH	NP_002361.1	0.85	7.13	-9.84	3.26e-21	4.88e-19	0.83	7.13	-10.22	1.32e-22	6.54e-20	-2.85	0.00435947	-++--+	0.011286	1	0.57	0.91			1	53672564	53724282	64	7	54162	1.1	0.13606	-	1
84265	POLR3GL	NP_115681.1	0.81	8.66	-9.84	3.36e-21	4.99e-19	0.81	8.66	-8.96	4.72e-18	6.14e-16	2.12	0.0336966	??+++-	0.0655507	1	0.9	1.01			1	145436236	145496081	23	5	54162	-0.13	0.55178	-	1
915	CD3D	NP_001035741.1	0.69	9.44	-9.83	3.56e-21	5.23e-19	0.71	9.44	-8.27	9.31e-16	7e-14	-1.2	0.229713	???--+	0.326473	1	0.92	0.97			11	118189789	118233459	70	12	54162	0.53	0.29714	-	1	Yes
1933	EEF1B2	NP_001032752.1	0.66	9.7	-9.83	3.56e-21	5.23e-19	0.69	9.7	-8.01	6.44e-15	4.05e-13	-1.41	0.157528	???--?	0.239431	1	0.88	0.93	-0.4705	-0.4111	2	207004318	207047653	95	8	54162	-0.72	0.76332	+	1	Yes
9168	TMSB10	NP_066926.1	0.86	12.59	-9.83	3.65e-21	5.32e-19	0.86	12.59	-8.68	4.07e-17	4.35e-15	-0.52	0.603826	--?+--	0.696814	1	0.83	0.94			2	85112763	85153799	92	8	54162	-1.27	0.89873	+	1
90843	TCEAL8	NP_001006685.1	0.87	7.14	-9.81	4.46e-21	6.46e-19	0.86	7.14	-8.89	8.21e-18	9.99e-16	-4.87	1.14e-06	-+?---	9.45e-06	0.0267836	0.6	0.87	-0.6618	-0.5011
6144	RPL21	NP_000973.2	0.62	9.09	-9.8	4.84e-21	6.96e-19	0.65	9.09	-7.79	3.27e-14	1.71e-12	0.36	0.719195	???-+?	0.793634	1	1.03	1.01			13	27805692	27850705	78	15	54162	-0.35	0.63678	+	1
10283	SDCCAG10	NP_005860.2	0.88	7.28	-9.78	5.45e-21	7.79e-19	0.88	7.28	-8.67	4.54e-17	4.76e-15	1.81	0.070359	++?++-	0.121857	1	2.59	1.2			5	64044755	64334590	500	23	54162	0.69	0.24642	+	1
57461	KIAA1160	XP_001130192.1	0.88	7.95	-9.77	5.91e-21	8.4e-19	0.87	7.95	-9.12	1.32e-18	2.02e-16	0.3	0.766399	+-?++?	0.83038	1	1.11	1.02			3	128826259	128900409	58	7	54162	-0.64	0.73753	-	1
84233	TMEM126A	NP_115649.1	0.81	7.3	-9.76	6.82e-21	9.63e-19	0.8	7.3	-9.21	6.25e-19	1.03e-16	-3.22	0.0013043	-----+	0.00394934	1	0.71	0.91			11	85338963	85387597	82	12	54162	0.92	0.17917	+	1
65109	UPF3B	NP_075386.1	0.89	7.2	-9.75	7.31e-21	1.03e-18	0.89	7.2	-8.49	1.76e-16	1.59e-14	0.33	0.741499	+++-+-	0.811132	1	0.9	1
63875	MRPL17	NP_071344.1	0.87	7.57	-9.74	8.09e-21	1.13e-18	0.86	7.57	-9.68	1.35e-20	3.31e-18	-0.38	0.701695	--++-+	0.780103	1	0.77	0.95			11	6681616	6724632	138	19	54162	-0.62	0.73288	-	1
79921	TCEAL4	NP_001006938.1	0.87	7.72	-9.72	9.6e-21	1.33e-18	0.89	7.72	-7.5	2.53e-13	1.08e-11	-4.87	1.09e-06	--?---	9.12e-06	0.0257162	0.72	0.89		-0.4625
6139	RPL17	NP_000976.1	0.74	8.11	-9.72	9.73e-21	1.34e-18	0.49	9.58	-8.91	6.76e-18	8.36e-16	-1.42	0.156052	??+--?	0.237526	1	1.14	1.02			18	46994851	47038935	170	16	54162	-0.02	0.50627	-	1	Yes
10569	SLU7	NP_006416.3	0.81	7.56	-9.7	1.09e-20	1.49e-18	0.8	7.56	-8.95	5.24e-18	6.66e-16	0.16	0.871394	++?+--	0.909304	1	1.29	1.04	0.466		5	159808648	159866168	125	20	54162	-1.55	0.93955	-	1
56945	MRPS22	NP_064576.1	0.81	7.85	-9.67	1.41e-20	1.92e-18	0.79	7.85	-9.86	2.85e-21	8.64e-19	-5.98	2.27e-09	------	5.92e-08	5.35e-05	0.56	0.85		-0.4583	3	139042861	139095888	117	14	54162	0.17	0.434	+	1
4733	DRG1	NP_004138.1	0.89	7.87	-9.64	1.76e-20	2.39e-18	0.9	7.87	-7.6	1.21e-13	5.53e-12	-4.79	1.68e-06	--?---	1.31e-05	0.0395256	0.72	0.89		-0.5286	22	31775539	31850172	129	17	54162	-0.73	0.76786	+	1
4190	MDH1	NP_005908.1	0.77	9.06	-9.63	1.92e-20	2.59e-18	0.75	9.06	-9.53	4.42e-20	1e-17	-5.81	6.43e-09	------	1.34e-07	0.000151354	0.39	0.7	-0.6526	-0.5438	2	63795743	63854331	96	10	54162	-0.06	0.52205	+	1
246184	CDC26	NP_644815.1	0.86	8.47	-9.62	2.16e-20	2.87e-18	0.87	8.47	-8.34	5.8e-16	4.58e-14	4.74	2.12e-06	+++++-	1.6e-05	0.0497793	1.24	1.09		0.5083	9	116009288	116057869	134	19	54162	-0.22	0.58795	-	1
64776	C11orf1	NP_073598.1	0.84	7.27	-9.61	2.39e-20	3.17e-18	0.83	7.27	-8.96	4.68e-18	6.11e-16	-2.56	0.0104528	--?---	0.0239884	1	0.64	0.87			11	111729948	111774798	68	8	54162	0.1	0.46211	+	1	Yes
650276	LOC650276	XP_944456.1	0.53	10.11	-9.6	2.56e-20	3.36e-18	0.54	10.11	-8.39	3.93e-16	3.24e-14
7266	DNAJC7	NP_003306.1	0.89	7.76	-9.57	3.15e-20	4.12e-18	0.9	7.76	-7	7.4e-12	2.24e-10	-3.17	0.00153886	-++---	0.00455579	1	0.55	0.89			17	40108439	40189715	91	12	54162	1.19	0.11615	-	1
6135	RPL11	NP_000966.2	0.74	11.47	-9.56	3.48e-20	4.51e-18	0.77	11.47	-7.16	2.53e-12	8.53e-11	2.96	0.00312128	-+++++	0.00845832	1	1.15	1.06			1	23998269	24042915	63	12	54162	-1.26	0.89541	+	1	Yes
5204	PFDN5	NP_002615.2	0.66	9.51	-9.53	4.4e-20	5.65e-18	0.67	9.51	-7.99	7.6e-15	4.69e-13	0.45	0.656103	-+?-++	0.741432	1	0.89	1.01			12	53669235	53713234	54	9	54162	1.03	0.15131	+	1
6129	RPL7	NP_000962.2	0.74	7.4	-9.53	4.75e-20	6.08e-18	0.75	7.4	-7.99	7.65e-15	4.69e-13	4.48	7.33e-06	++?+++	4.58e-05	0.172499	1.41	1.14			8	74182874	74225869	110	14	54162	-0.18	0.57013	-	1
23029	RBM34	NP_055829.1	0.88	7.36	-9.52	4.93e-20	6.23e-18	0.88	7.36	-8.22	1.41e-15	1.03e-13	-1.94	0.0529042	???--?	0.0958685	1	0.96	0.97			1	235274498	235344571	126	10	54162	-1.09	0.86272	-	1
3015	H2AFZ	NP_002097.1	0.8	10.38	-9.52	5.14e-20	6.47e-18	0.77	10.38	-10.05	5.68e-22	2.19e-19	-0.19	0.848582	-+?+--	0.893065	1	0.74	0.95			4	100849242	100891512	70	13	54162	1.09	0.13856	-	1
153222	C5orf41	NP_705835.1	1.2	9.78	9.51	5.39e-20	6.74e-18	1.12	9.78	5.27	1.98e-07	1.97e-06	4.64	3.47e-06	++?++-	2.43e-05	0.0816959	1.21	1.12	0.5616		5	172463355	172586291	267	17	54162	-0.91	0.81855	+	1
55781	RIOK2	NP_060813.1	0.86	7.15	-9.51	5.48e-20	6.8e-18	0.85	7.15	-9.43	1e-19	2.11e-17	-0.13	0.893555	-+-++-	0.926064	1	0.73	0.95			5	96476571	96539005	174	30	54162	0.8	0.21137	-	1	Yes
388532	LOC388532	XP_944819.1	0.66	8.32	-9.49	6.43e-20	7.91e-18	0.67	8.32	-7.88	1.73e-14	9.84e-13	0.79	0.427129	???-+?	0.535533	1	1.06	1.03
5356	PLRG1	NP_002660.1	0.85	7.95	-9.48	6.85e-20	8.38e-18	0.85	7.95	-8.7	3.73e-17	4.08e-15	-4.51	6.56e-06	--?---	4.17e-05	0.15446	0.73	0.86		-0.4316	4	155436149	155491585	154	14	54162	-0.64	0.73811	-	1
255758	TCTEX1D2	NP_689986.1	0.9	6.95	-9.48	7e-20	8.51e-18	0.89	6.95	-9.19	7.16e-19	1.16e-16	-3.29	0.000987033	-+?---	0.00310078	1	0.65	0.88		-0.4498	3	195998090	196065165	170	16	54162	-1.28	0.90058	-	1
23478	SEC11A	NP_055115.1	0.79	8.88	-9.47	7.55e-20	9.14e-18	0.78	8.88	-9.01	3.07e-18	4.33e-16	4.47	7.97e-06	-+++++	4.94e-05	0.187549	0.69	1.03	0.6665	0.5787	15	85192768	85279691	182	24	54162	2.1	0.01787	-	1
51399	TRAPPC4	NP_057230.1	0.87	8.49	-9.38	1.59e-19	1.91e-17	0.89	8.49	-6.97	8.8e-12	2.61e-10	-5.58	2.47e-08	--?--?	4.01e-07	0.000581125	0.64	0.83			11	118869241	118914384	92	8	54162	1.09	0.13713	+	1
84817	TXNDC17	NP_116120.1	0.76	8.17	-9.38	1.62e-19	1.93e-17	0.72	8.17	-9.96	1.22e-21	4.15e-19	-4.62	3.78e-06	--?---	2.6e-05	0.0890329	0.66	0.85			17	6524222	6567861	146	13	54162	0.07	0.47197	+	1
54534	MRPL50	NP_061924.1	0.86	7.01	-9.37	1.71e-19	2.02e-17	0.85	7.01	-8.71	3.29e-17	3.64e-15	-2.83	0.00459969	-----+	0.0118207	1	0.69	0.91			9	104131096	104180919	117	18	54162	-1.09	0.86264	-	1
127018	LYPLAL1	NP_620149.1	0.87	7.7	-9.36	1.93e-19	2.26e-17	0.85	7.7	-9.97	1.08e-21	3.79e-19	-3.21	0.00130482	------	0.00395038	1	0.81	0.9			1	219327192	219406207	104	10	54162	-0.88	0.81043	+	1
1349	COX7B	NP_001857.1	0.77	7.16	-9.35	2.07e-19	2.41e-17	0.76	7.16	-8.79	1.85e-17	2.15e-15	-3.76	0.000172272	-----+	0.000688342	1	0.46	0.83	-0.6134	-0.5108
9931	HELZ	NP_055692.2	1.12	8.11	9.34	2.21e-19	2.55e-17	1.12	8.11	8.58	8.83e-17	8.45e-15	3.48	0.000504595	-+?+++	0.00173762	1	0.89	1.02			17	65046554	65261349	330	17	54162	-0.3	0.61732	-	1
146225	CMTM2	NP_653274.1	0.7	9.72	-9.34	2.22e-19	2.55e-17	0.66	9.72	-9.73	8.49e-21	2.17e-18	2.82	0.00487048	???+++	0.0124284	1	1.11	1.06			16	66593351	66642178	87	7	54162	-0.51	0.69628	+	1
388621	LOC388621	XP_946288.1	0.64	8.61	-9.34	2.23e-19	2.55e-17	0.66	8.61	-7.59	1.35e-13	6.09e-12	3.91	9.4e-05	???++?	0.000408034	1	1.12	1.09
204	AK2	NP_001616.1	0.9	7.87	-9.33	2.38e-19	2.71e-17	0.92	7.87	-6.59	1.04e-10	2.34e-09	5.32	1.03e-07	+-++++	1.28e-06	0.00242623	1.32	1.11	-0.5213	-0.4529	1	33453541	33522512	87	6	54162	0.62	0.26729	-	1
219927	MRPL21	NP_852616.1	0.86	8.01	-9.3	3e-19	3.38e-17	0.86	8.01	-8.19	1.75e-15	1.25e-13	-2.68	0.0073749	--?--+	0.0177399	1	0.8	0.93		-0.4559	11	68638744	68691303	93	11	54162	0.4	0.34603	-	1
51121	RPL26L1	NP_057177.1	0.83	7.15	-9.3	3.04e-19	3.4e-17	0.88	6.85	-9.39	1.49e-19	2.97e-17	-3.6	0.000315447	-+---+	0.00116085	1	0.81	0.93		-0.451	5	172365917	172416774	127	19	54162	-1.09	0.86237	+	1
642210	LOC642210	XP_941967.1	0.84	13.14	-9.29	3.21e-19	3.58e-17	0.87	13.14	-6.61	8.8e-11	2.05e-09
729466	LOC729466		0.75	10.3	-9.28	3.45e-19	3.81e-17	0.75	10.3	-8.45	2.39e-16	2.07e-14
10539	TXNL2	NP_006532.2	0.87	7.42	-9.28	3.51e-19	3.85e-17	0.86	7.42	-9.26	4.16e-19	7.28e-17	1.52	0.128599	--?+++	0.202594	1	0.7	0.97	0.6052	0.4516	10	131914639	131998646	307	24	54162	-0.91	0.81848	+	1
4708	NDUFB2	NP_004537.1	0.74	9.03	-9.27	3.96e-19	4.33e-17	0.71	9.03	-9.42	1.15e-19	2.39e-17	-2.83	0.00461535	--+---	0.0118571	1	0.63	0.9	-0.6501	-0.5217	7	140376481	140426446	64	7	54162	-1.62	0.94764	+	1
401397	LOC401397	XP_001132317.1	0.82	7.31	-9.26	4.07e-19	4.43e-17	0.79	7.31	-9.6	2.45e-20	5.75e-18	-1.39	0.165067	-+?---	0.248632	1	0.92	0.97
731640	LOC731640	XP_001133089.1	0.65	8.39	-9.25	4.49e-19	4.86e-17	0.67	8.39	-7.78	3.45e-14	1.79e-12
51260	CXorf26	NP_057584.2	0.86	7.57	-9.25	4.51e-19	4.86e-17	0.86	7.57	-8.48	1.9e-16	1.7e-14	0.25	0.799308	--++--	0.856219	1	0.89	0.96
9349	RPL23	NP_000969.1	0.63	8.03	-9.25	4.59e-19	4.93e-17	0.64	8.03	-8.02	6.25e-15	3.95e-13	2.85	0.00440946	???++-	0.0113979	1	1.07	1.04			17	36986321	37030053	109	18	54162	0.14	0.44396	-	1
129531	MITD1	NP_620153.1	0.86	7.72	-9.24	5.05e-19	5.39e-17	0.84	7.72	-9.94	1.4e-21	4.61e-19	2.6	0.00939435	-+?++-	0.0218666	1	1.21	1.05	0.66	0.5307	2	99765726	99817524	115	10	54162	-0.84	0.80079	-	1
689	BTF3	NP_001032726.1	0.82	11.6	-9.23	5.38e-19	5.73e-17	0.87	11.6	-5.82	1e-08	1.39e-07	1.65	0.098604	++++++	0.16192	1	1.13	1.05			5	72774250	72821448	148	9	54162	1.03	0.15087	+	1
27089	UQCRQ	NP_055217.2	0.68	8.52	-9.23	5.41e-19	5.73e-17	0.64	8.52	-9.25	4.45e-19	7.73e-17	-5.35	8.86e-08	--?--+	1.13e-06	0.00208469	0.64	0.88	-0.7253	-0.572	5	132182319	132224536	72	9	54162	-0.5	0.6929	+	1
51138	COPS4	NP_057213.2	0.86	7.49	-9.23	5.54e-19	5.84e-17	0.84	7.49	-9	3.53e-18	4.78e-16	-5.17	2.35e-07	------	2.5e-06	0.00553239	0.54	0.78			4	83936239	84016971	73	10	54162	0.18	0.42948	+	1
730994	LOC730994	XP_001132373.1	1.19	8.91	9.2	6.66e-19	6.98e-17	1.21	8.91	8.69	3.96e-17	4.28e-15
6152	RPL24	NP_000977.1	0.75	11.03	-9.19	7.46e-19	7.72e-17	0.76	11.03	-7.92	1.29e-14	7.54e-13	0.1	0.920394	-+?-++	0.945013	1	1.12	1.02			3	101379934	101425564	76	10	54162	1.24	0.10678	-	1
648622	LOC648622	XP_942784.1	0.57	9.39	-9.19	7.72e-19	7.91e-17	0.56	9.39	-8.37	4.47e-16	3.61e-14
26354	GNL3	NP_055181.3	0.87	7.14	-9.18	7.98e-19	8.15e-17	0.86	7.14	-8.98	3.96e-18	5.33e-16	-2.51	0.0119145	+-?--?	0.0268919	1	0.9	0.97			3	52699936	52748513	74	6	54162	-0.64	0.73797	+	1	Yes
23218	NBEAL2	NP_055990.1	1.22	8.59	9.18	8.16e-19	8.29e-17	1.18	8.59	6.74	3.97e-11	9.96e-10	3.14	0.00171097	?+?+++	0.00499741	1	1.11	1.06			3	47001173	47071194	93	9	54162	-0.06	0.52567	+	1	Yes
2483	FRG1	NP_004468.1	0.85	7.66	-9.17	9.02e-19	9.12e-17	0.84	7.66	-8.6	7.77e-17	7.62e-15	-2.24	0.0248116	???--?	0.0504552	1	0.91	0.95			4	190841974	190904360	5	1	54162	1.38	0.084369	+	1
1337	COX6A1	NP_004364.2	0.86	8.52	-9.16	9.36e-19	9.38e-17	0.84	8.52	-9.33	2.47e-19	4.47e-17	-1.31	0.191394	------	0.28097	1	0.89	0.96			12	120855893	120898545	104	16	54162	1.28	0.099455	+	1
388789	LOC388789	XP_945047.2	0.87	7.89	-9.15	9.91e-19	9.89e-17	0.86	7.89	-9.18	7.74e-19	1.22e-16	-2.64	0.00835893	--?--?	0.0197654	1	0.51	0.83
1163	CKS1B	NP_001817.1	0.87	7.18	-9.15	1.02e-18	1.01e-16	0.88	7.18	-7.46	3.3e-13	1.38e-11	0.86	0.392205	-+++++	0.500901	1	0.7	0.97			1	154927118	154971725	42	5	54162	-0.45	0.67258	+	1
91942	NDUFAF2	NP_777549.1	0.89	7.16	-9.13	1.22e-18	1.2e-16	0.88	7.16	-8.96	4.56e-18	6e-16	-3.87	0.000110533	--?---	0.000469645	1	0.89	0.94			5	60220956	60468864	483	20	54162	1.21	0.11303	+	1
4925	NUCB2	NP_005004.1	0.88	7.05	-9.11	1.4e-18	1.37e-16	0.88	7.05	-7.74	4.51e-14	2.24e-12	-0.33	0.738152	++?+-+	0.808713	1	1.16	1.03			11	17261884	17391510	231	24	54162	2.24	0.012594	+	1	Yes
6643	SNX2	NP_003091.2	0.82	8.51	-9.1	1.5e-18	1.46e-16	0.81	8.51	-9	3.36e-18	4.61e-16	-0.62	0.536672	-+++--	0.638288	1	0.73	0.93			5	122090691	122190234	297	18	54162	-0.32	0.62623	+	1
642250	LOC642250	NP_001083061.1	0.52	10.34	-9.1	1.59e-18	1.55e-16	0.5	10.34	-8.45	2.53e-16	2.17e-14
84365	MKI67IP	NP_115766.2	0.84	7.48	-9.09	1.62e-18	1.57e-16	0.83	7.48	-9.12	1.35e-18	2.03e-16	-4.78	1.76e-06	------	1.36e-05	0.0413553	0.57	0.85			2	122464521	122514503	104	8	54162	-1.06	0.85449	-	1	Yes
9325	TRIP4	NP_057297.2	0.89	7.7	-9.09	1.67e-18	1.61e-16	0.9	7.7	-7.55	1.72e-13	7.64e-12	4.27	1.97e-05	++?++-	0.00010649	0.463871	1.16	1.08	0.641	0.5722	15	64660003	64767502	142	13	54162	0.78	0.21834	+	1		Yes
4026	LPP	NP_005569.1	1.16	9.72	9.08	1.76e-18	1.69e-16	1.13	9.72	6.71	4.72e-11	1.16e-09	4.07	4.8e-05	++?+++	0.000228842	1	2.06	1.3	0.6083	0.5137	3	187851097	188628460	1932	198	54162	-0.26	0.60305	+	1	Yes
55854	ZC3H15	NP_060941.2	0.86	7.14	-9.08	1.84e-18	1.75e-16	0.85	7.14	-8.68	4.21e-17	4.47e-15	-3.86	0.000113126	--?---	0.000478835	1	0.65	0.86			2	187330885	187394088	120	13	54162	0.66	0.25563	+	1
84707	BEX2	NP_116010.1	0.86	7.12	-9.07	1.99e-18	1.89e-16	0.86	7.12	-7.79	3.33e-14	1.73e-12	-4.94	7.94e-07	--?--+	6.91e-06	0.0186722	0.58	0.79	-0.6748	-0.5743											Yes
10199	MPHOSPH10	NP_005782.1	0.86	7.81	-9.06	2.19e-18	2.07e-16	0.87	7.81	-7.38	5.57e-13	2.2e-11	-1.49	0.136455	++----	0.212776	1	0.84	0.99			2	71337444	71397232	199	26	54162	1.81	0.035445	+	1	Yes
6160	RPL31	NP_000984.1	0.56	8.81	-9.05	2.23e-18	2.1e-16	0.53	8.81	-8.93	5.84e-18	7.29e-16	1.77	0.0771503	++?++-	0.131604	1	1.29	1.08			2	101598691	101656155	130	16	54162	0.13	0.44834	+	1
10632	ATP5L	NP_006467.4	0.76	9.96	-9.05	2.32e-18	2.17e-16	0.77	9.96	-7.78	3.55e-14	1.83e-12	-5.14	2.74e-07	--?---	2.86e-06	0.00645655	0.54	0.82	-0.655	-0.5238	11	118252104	118300562	67	9	54162	1.24	0.10692	+	1	Yes
5689	PSMB1	NP_002784.1	0.8	10.11	-9.03	2.62e-18	2.44e-16	0.78	10.11	-9.35	2.06e-19	3.88e-17	-3.09	0.00203109	-+---+	0.00581973	1	0.86	0.95	0.4846	0.4458	6	170824204	170882417	127	9	54162	1.47	0.07115	-	1
6218	RPS17	NP_001012.1	0.62	9.17	-9.03	2.76e-18	2.57e-16	0.6	9.17	-8.43	2.83e-16	2.39e-14	2.66	0.0078946	???++?	0.0188192	1	1.12	1.07
23053	KIAA0913	NP_055852.2	1.17	8.87	9.02	2.94e-18	2.72e-16	1.18	8.87	8.38	4.09e-16	3.33e-14	4.36	1.29e-05	++?+++	7.38e-05	0.303263	1.79	1.2	0.6091	0.4808	10	75525334	75581556	50	5	54162	1.54	0.062219	+	1	Yes
9551	ATP5J2	NP_004880.1	0.86	9.01	-9.01	3.04e-18	2.8e-16	0.86	9.01	-8.21	1.52e-15	1.1e-13	-3.93	8.38e-05	--?---	0.000369631	1	0.56	0.84	-0.6796	-0.5782	7	99035784	99083824	67	6	54162	0.86	0.19491	-	1
51538	ZCCHC17	NP_057589.2	0.88	7.69	-9	3.31e-18	3.04e-16	0.88	7.69	-7.86	2.01e-14	1.12e-12	-8.91	0	------	0	0	0.65	0.81	-0.7271	-0.5855	1	31749832	31858569	237	11	54162	-0.04	0.51505	+	1
79657	RPAP3	NP_078880.1	0.87	7.32	-9	3.52e-18	3.22e-16	0.86	7.32	-8.9	7.34e-18	9.03e-16	-4.81	1.47e-06	--?---	1.18e-05	0.0346778	0.79	0.86			12	48035715	48119844	171	20	54162	0.11	0.45791	-	1
648638	LOC648638	XP_942799.1	0.92	6.9	-8.98	3.87e-18	3.52e-16	0.92	6.9	-7.61	1.18e-13	5.39e-12
10482	NXF1	NP_006353.2	1.14	9.27	8.98	4.08e-18	3.69e-16	1.16	9.27	9.25	4.71e-19	7.99e-17	3.42	0.000623607	++?+++	0.00208756	1	1.09	1.07			11	62539597	62592964	65	7	54162	1.37	0.0858	-	1
90441	ZNF622	NP_219482.1	0.9	8.29	-8.97	4.28e-18	3.85e-16	0.9	8.29	-7.96	9.38e-15	5.68e-13	-4.64	3.42e-06	-----+	2.39e-05	0.080361	0.66	0.89			5	16431628	16485894	124	15	54162	2.41	0.007928	-	1
55262	C7orf43	NP_060745.3	1.15	8.04	8.97	4.45e-18	3.99e-16	1.12	8.04	6.21	1.05e-09	1.85e-08	-1.02	0.308143	?--+--	0.41399	1	0.92	0.96	-0.5559	-0.4028	7	99732043	99776338	47	8	54162	3.45	0.00027865	-	1
654194	LOC654194	XP_947762.1	0.63	9.4	-8.94	5.46e-18	4.87e-16	0.64	9.4	-7.78	3.41e-14	1.77e-12
5917	RARS	NP_002878.2	0.88	8.36	-8.94	5.6e-18	4.98e-16	0.87	8.36	-8.57	9.75e-17	9.13e-15	-2.66	0.00772061	---+--	0.0184587	1	0.58	0.87			5	167893463	167966311	216	12	54162	0.23	0.40931	+	1
59286	UBL5	NP_001041706.1	0.83	8.5	-8.94	5.71e-18	5.05e-16	0.8	8.5	-9.51	5.45e-20	1.19e-17	-4.93	8.25e-07	------	7.16e-06	0.0194184	0.78	0.92	-0.4513	-0.443	19	9918556	9960797	54	9	54162	-0.22	0.58609	+	1
4528	MTIF2	NP_001005369.1	0.9	7.5	-8.9	7.37e-18	6.5e-16	0.9	7.5	-8.02	5.9e-15	3.77e-13	0.3	0.761294	++?+--	0.826447	1	1.16	1.02			2	55443756	55516384	190	29	54162	-0.26	0.60326	-	1
51188	SS18L2	NP_057389.1	0.76	9.33	-8.9	7.83e-18	6.88e-16	0.74	9.33	-8.69	3.97e-17	4.28e-15	0.85	0.395139	-+?++-	0.503905	1	0.81	0.97			3	42603332	42656490	130	14	54162	1.7	0.04425	+	1
51065	RPS27L	NP_057004.1	0.69	7.73	-8.86	1.06e-17	9.21e-16	0.67	7.73	-8.71	3.33e-17	3.66e-15	4.69	2.68e-06	-+?++-	1.94e-05	0.0629904	0.7	1.04	0.6783	0.521	15	63425539	63469741	120	17	54162	1.28	0.10005	-	1
9535	GMFG	NP_004868.1	0.75	9.62	-8.82	1.41e-17	1.22e-15	0.71	9.62	-9.33	2.44e-19	4.44e-17	5.11	3.23e-07	?++++-	3.26e-06	0.0076003	1.25	1.12			19	39798999	39846726	89	11	54162	1.36	0.086166	-	1
38	ACAT1	NP_000010.1	0.84	7.5	-8.82	1.45e-17	1.25e-15	0.82	7.5	-9.04	2.41e-18	3.45e-16	-2.45	0.014136	------	0.0311647	1	0.75	0.91			11	107972258	108038895	92	15	54162	-0.67	0.74968	+	1
642236	LOC642236	XP_948098.2	0.87	7.85	-8.79	1.74e-17	1.49e-15	0.85	7.85	-8.73	2.93e-17	3.28e-15	3.15	0.00163444	++????	0.0047989	1	1.39	1.22
10330	TMEM4	NP_055070.1	0.9	7.42	-8.78	1.9e-17	1.63e-15	0.91	7.42	-7.68	6.86e-14	3.29e-12	-4.65	3.39e-06	--+---	2.38e-05	0.0797976	0.65	0.89			12	56684212	56730128	51	3	54162	0.87	0.19352	-	1
51808	RNUXA	NP_115553.2	0.92	7.1	-8.77	2.1e-17	1.79e-15	0.93	7.1	-7.09	3.89e-12	1.25e-10	-2.44	0.0148565	-+?---	0.0324852	1	0.65	0.91			5	125916607	125982944	160	17	54162	-1.3	0.90291	+	1
402057	LOC402057	NP_001073968.1	0.61	9.98	-8.77	2.11e-17	1.79e-15	0.58	9.98	-8.49	1.83e-16	1.65e-14	1.44	0.150897	???++?	0.230964	1	1.05	1.03
4712	NDUFB6	NP_002484.1	0.85	8.71	-8.76	2.18e-17	1.84e-15	0.85	8	-9.18	7.9e-19	1.24e-16	-5.2	1.96e-07	-+?---	2.15e-06	0.00460284	0.62	0.84	-0.6289	-0.4997	9	32533524	32593182	85	14	54162	-1.32	0.90583	-	1
6232	RPS27	NP_001021.1	0.6	9.28	-8.75	2.53e-17	2.13e-15	0.61	12.65	-8.33	5.95e-16	4.65e-14	3.2	0.00135998	++?+++	0.00409842	1	1.79	1.21	0.679	0.5534	1	153943239	153984631	32	7	54162	-0.76	0.77782	+	1
6224	RPS20	NP_001014.1	0.76	11.43	-8.74	2.69e-17	2.25e-15	0.79	11.43	-6.73	4.13e-11	1.03e-09	1.65	0.0980608	??+++?	0.161231	1	1.06	1.04			8	56960739	57007140	127	8	54162	1.64	0.05082	-	1	Yes
2029	ENSA	NP_997051.1	0.89	7.61	-8.73	2.77e-17	2.31e-15	0.87	7.61	-9.96	1.21e-21	4.15e-19	-5.23	1.71e-07	--?--+	1.93e-06	0.00403386	0.54	0.74	-0.6105	-0.4825	1	150574599	150622098	82	12	54162	-0.01	0.50212	-	1
101	ADAM8	NP_001100.2	1.2	9.51	8.73	2.8e-17	2.32e-15	1.2	9.51	7.77	3.68e-14	1.88e-12	3.17	0.00154173	???+++	0.00456256	1	1.09	1.07			10	135055920	135110489	116	10	54162	2.12	0.017057	-	1
5683	PSMA2	NP_002778.1	0.89	6.99	-8.73	2.88e-17	2.39e-15	0.88	6.99	-8.59	8.19e-17	7.96e-15	-1.81	0.0697586	-+----	0.121022	1	0.56	0.89			7	42936460	42991805	135	9	54162	0.45	0.32762	-	1
10436	EMG1	NP_006322.3	0.86	7.49	-8.73	2.9e-17	2.39e-15	0.86	7.49	-7.99	7.53e-15	4.66e-13	-0.48	0.633259	--?+--	0.721788	1	0.55	0.88
326624	RAB37	NP_001006639.1	1.2	8.89	8.71	3.43e-17	2.82e-15	1.18	8.89	6.92	1.24e-11	3.5e-10	-3.41	0.000644157	--?---	0.00214841	1	0.71	0.88	-0.4786	-0.403	17	72647256	72763474	155	28	54162	0.25	0.39989	+	1	Yes
746	C11orf10	NP_055021.1	0.87	10.56	-8.7	3.67e-17	3e-15	0.87	10.56	-7.75	4.18e-14	2.1e-12	0.36	0.722086	++?+-+	0.796041	1	1.08	1.02			11	61536602	61580085	46	7	54162	-0.09	0.53668	-	1
1316	KLF6	NP_001291.3	1.16	11.74	8.7	3.71e-17	3.03e-15	1.16	11.74	7.38	5.8e-13	2.27e-11	5.73	9.95e-09	++?+++	1.92e-07	0.000234144	1.96	1.29			10	3798188	3847473	186	23	54162	1.18	0.11849	-	1	Yes
8227	SFRS17A	NP_005079.2	1.12	8.13	8.7	3.75e-17	3.04e-15	1.08	8.13	5.12	4.14e-07	3.79e-06	-0.9	0.366225	+++--+	0.47499	1	1.11	1.03
6818	SULT1A3	NP_003157.1	1.14	7.65	8.69	4.01e-17	3.25e-15	1.15	7.65	8.32	6.71e-16	5.18e-14	0.11	0.914804	???-+?	0.941081	1	1.03	1.01			16	30190549	30235650	9	4	54162	-0.64	0.73902	+	1
60492	CCDC90B	NP_068597.2	0.85	7.99	-8.67	4.51e-17	3.64e-15	0.84	7.99	-8.49	1.87e-16	1.67e-14	0.46	0.646801	-+++--	0.733439	1	0.71	0.96			11	82952498	83017445	135	13	54162	-0.07	0.52611	-	1
85025	TMEM60	NP_116325.1	0.88	8.35	-8.67	4.74e-17	3.81e-15	0.86	8.35	-9.34	2.14e-19	3.99e-17	-0.26	0.791814	-+++--	0.850321	1	0.73	0.94			7	77403045	77447747	93	14	54162	0.88	0.18881	-	1
51389	RWDD1	NP_001007465.1	0.73	8.29	-8.65	5.16e-17	4.14e-15	0.71	8.29	-8.57	9.59e-17	9.01e-15	4.9	9.75e-07	-+?++-	8.3e-06	0.0229438	0.54	0.93			6	116872583	116934438	140	17	54162	-0.97	0.83495	+	1
653773	LOC653773	XP_943848.1	0.66	7.71	-8.65	5.4e-17	4.31e-15	0.66	7.71	-7.87	1.8e-14	1.02e-12
6164	RPL34	NP_296374.1	0.91	6.79	-8.62	6.49e-17	5.17e-15	0.91	6.79	-7.89	1.55e-14	8.88e-13	-0.82	0.414619	-+++--	0.523204	1	0.88	0.96		-0.4569	4	109521722	109571640	104	11	54162	-0.62	0.73114	+	1
51510	CHMP5	NP_057494.2	0.81	7.11	-8.62	6.91e-17	5.48e-15	0.77	7.11	-9.09	1.61e-18	2.39e-16	-4.11	3.92e-05	-+----	0.00019186	0.923367	0.67	0.89			9	33244877	33302067	53	5	54162	1.04	0.14938	+	1
25847	ANAPC13	NP_056206.1	0.83	8.98	-8.59	8.15e-17	6.42e-15	0.79	8.98	-9.25	4.49e-19	7.75e-17	-3.07	0.00216849	--?---	0.00616985	1	0.46	0.83			3	134176546	134224865	84	5	54162	0.84	0.20161	-	1
51637	C14orf166	NP_057123.1	0.84	7.83	-8.58	9.45e-17	7.39e-15	0.83	7.83	-8.02	6.1e-15	3.88e-13	1.39	0.165707	-+++--	0.249462	1	0.86	0.98			14	52436228	52491420	131	22	54162	-1.24	0.89318	+	1
649548	LOC649548	XP_943716.1	0.79	11.71	-8.57	9.75e-17	7.6e-15	0.81	11.71	-6.67	6.26e-11	1.51e-09
90701	SEC11C	NP_150596.1	0.85	7.63	-8.57	1.01e-16	7.86e-15	0.83	7.63	-8.66	4.82e-17	4.94e-15	-2.09	0.0369967	--?--+	0.0709175	1	0.75	0.93			18	56786709	56846069	177	18	54162	-0.01	0.50388	+	1
10357	HMG1L1	NP_001008735.1	0.83	7.36	-8.55	1.12e-16	8.66e-15	0.82	7.36	-8.15	2.3e-15	1.61e-13
58515	SELK	NP_067060.2	0.84	7.74	-8.55	1.14e-16	8.74e-15	0.83	7.74	-7.91	1.37e-14	7.97e-13	0.4	0.691053	+-?-++	0.77137	1	1.09	1.04			3	53899226	53945989	121	12	54162	-0.45	0.67512	-	1
7920	BAT5	NP_066983.1	1.1	8.33	8.53	1.38e-16	1.05e-14	1.08	8.33	5.78	1.23e-08	1.65e-07	-1.32	0.187262	??++--	0.275996	1	0.92	0.97			6	31634726	31691137	116	22	54162	1.26	0.10464	-	1	Yes
537	ATP6AP1	NP_001174.2	1.17	10.43	8.51	1.59e-16	1.21e-14	1.22	10.43	9.49	6.54e-20	1.42e-17	-4.69	2.69e-06	--?---	1.95e-05	0.0632541	0.52	0.82		-0.5183
11235	PDCD10	NP_665858.1	0.76	7.57	-8.51	1.62e-16	1.23e-14	0.72	7.57	-9.25	4.67e-19	7.99e-17	-4.71	2.51e-06	--?---	1.84e-05	0.0589819	0.83	0.91			3	167381692	167472693	119	6	54162	-0.87	0.80906	-	1
64979	MRPL36	NP_115868.1	0.87	7.81	-8.5	1.64e-16	1.24e-14	0.87	7.81	-7.85	2.16e-14	1.19e-12	-3.46	0.000530543	-++---	0.00181343	1	0.75	0.93			5	1778499	1819956	143	15	54162	-0.4	0.6544	-	1
79716	NPEPL1	NP_078939.3	1.16	8.68	8.5	1.69e-16	1.27e-14	1.15	8.68	7.48	2.87e-13	1.21e-11	0.13	0.894167	++?-+?	0.926494	1	1.14	1.05			20	57244187	57310900	183	20	54162	-0.15	0.56055	+	1
301	ANXA1	NP_000691.1	0.66	10.13	-8.5	1.71e-16	1.29e-14	0.62	10.13	-8.47	2.12e-16	1.85e-14	5.91	3.41e-09	++++++	8.07e-08	8.03e-05	1.58	1.27		0.4777	9	75746721	75805309	170	32	54162	-0.08	0.53234	+	1	Yes
51535	PPHLN1	NP_057572.5	0.9	8.32	-8.48	1.92e-16	1.44e-14	0.92	8.32	-5.96	4.35e-09	6.65e-08	0.59	0.557148	++?+--	0.65693	1	0.82	1			12	42699947	42862422	416	15	54162	0.24	0.4037	+	1
338692	ANKRD13D	XP_950664.1	1.24	8.8	8.48	1.97e-16	1.47e-14	1.27	8.8	8.27	9.46e-16	7.08e-14	6.43	1.29e-10	++?+++	5.87e-09	3.03e-06	2.53	1.36		0.4783	11	67036762	67089955	55	10	54162	-0.04	0.51416	+	1
9605	C16orf7	NP_004904.2	1.16	7.99	8.48	2.03e-16	1.51e-14	1.15	7.99	7.05	5.18e-12	1.62e-10	2.21	0.0268105	+-?+++	0.0539235	1	1.28	1.07			16	89753541	89807398	159	20	54162	0.29	0.38445	-	1
1350	COX7C	NP_001858.1	0.61	9.12	-8.47	2.09e-16	1.55e-14	0.59	9.12	-8.01	6.5e-15	4.07e-13	-0.87	0.383331	-+++--	0.492507	1	0.59	0.92			5	85893784	85936583	48	14	54162	0.35	0.36374	+	1
8802	SUCLG1	NP_003840.2	0.91	8.36	-8.45	2.42e-16	1.79e-14	0.88	8.36	-10.51	9.8e-24	7.2e-21	-2.44	0.0146212	--?---	0.0320662	1	0.91	0.95			2	84630647	84706586	146	11	54162	-0.55	0.70944	-	1
10969	EBNA1BP2	NP_006815.1	0.9	8.13	-8.44	2.69e-16	1.98e-14	0.91	8.13	-6.46	2.33e-10	4.83e-09	-7.18	6.99e-13	------	1e-10	1.65e-08	0.61	0.79	-0.6508	-0.5184	1	43609845	43658241	182	16	54162	-0.99	0.83859	-	1
10153	CEBPZ	NP_005751.2	0.81	7.9	-8.44	2.71e-16	1.99e-14	0.8	7.9	-8.05	4.98e-15	3.26e-13	4.4	1.07e-05	+-+++-	6.35e-05	0.252871	1.26	1.09		0.4435	2	37408772	37478740	217	24	54162	0.98	0.16428	-	1
8520	HAT1	NP_003633.1	0.85	7.06	-8.44	2.76e-16	2.02e-14	0.84	7.06	-7.87	1.77e-14	1.01e-12	0.8	0.421181	-+?++-	0.529373	1	0.89	0.99			2	172758935	172868600	222	25	54162	1.43	0.076509	+	1
3820	KLRB1	NP_002249.1	0.66	8.99	-8.42	3.12e-16	2.27e-14	0.66	8.99	-7.49	2.62e-13	1.12e-11	1.85	0.0645485	???+-+	0.113472	1	1.07	1.03													Yes
643007	LOC643007	XP_943182.1	0.92	6.76	-8.42	3.13e-16	2.27e-14	0.92	6.76	-7.02	6.23e-12	1.92e-10
1347	COX7A2	NP_001856.1	0.72	9.56	-8.41	3.37e-16	2.44e-14	0.65	9.56	-9.8	4.79e-21	1.31e-18	-4.74	2.12e-06	-+----	1.6e-05	0.0499122	0.72	0.88	-0.6639	-0.537	6	75927391	75973644	71	6	54162	0.69	0.24605	-	1
27257	LSM1	NP_055277.1	0.8	8.53	-8.41	3.4e-16	2.45e-14	0.77	8.53	-8.66	4.81e-17	4.94e-15	-0.47	0.641109	-++---	0.728512	1	0.88	0.98			8	38000839	38054248	55	5	54162	0.5	0.30915	-	1
9326	ZNHIT3	NP_004764.1	0.77	8.19	-8.41	3.43e-16	2.46e-14	0.74	8.19	-8.7	3.75e-17	4.08e-15	-4.94	7.83e-07	--?---	6.84e-06	0.018426	0.49	0.81	-0.6343	-0.4967	17	34822471	34875154	78	12	54162	-1.18	0.88104	+	1
51076	CUTC	NP_057044.2	0.88	7.5	-8.4	3.6e-16	2.58e-14	0.87	7.5	-8.34	5.87e-16	4.61e-14	-1.7	0.0884205	-+?--+	0.147765	1	0.81	0.95			10	101471958	101535894	72	12	54162	0.39	0.34647	+	1
653377	LOC653377	XP_934513.1	0.92	7.28	-8.38	4.12e-16	2.93e-14	0.92	7.28	-7.58	1.43e-13	6.44e-12
6206	RPS12	NP_001007.2	0.87	13.46	-8.37	4.38e-16	3.11e-14	0.92	13.46	-4.62	4.67e-06	3.34e-05	4.07	4.71e-05	++?+++	0.0002253	1	1.13	1.08			6	133115708	133162007	188	17	54162	-0.63	0.73617	+	1
132299	OCIAD2	NP_001014446.1	0.85	8.26	-8.37	4.62e-16	3.25e-14	0.88	8.26	-5.94	5.03e-09	7.55e-08	-4.73	2.29e-06	--?---	1.7e-05	0.0538224	0.55	0.81	-0.6713	-0.5303	4	48867405	48928815	83	12	54162	1.32	0.093752	-	1	Yes
653972	LOC653972	XP_943872.1	0.93	6.93	-8.37	4.62e-16	3.25e-14	0.93	6.93	-6.91	1.31e-11	3.71e-10
114932	MRFAP1L1	NP_982287.1	0.8	8.65	-8.36	4.91e-16	3.45e-14	0.78	8.65	-8.36	4.78e-16	3.82e-14	-2.95	0.00312965	--?--+	0.00847711	1	0.73	0.92			4	6689428	6731606	85	18	54162	0.42	0.33549	-	1
834	CASP1	NP_150636.1	0.8	9.19	-8.35	5.31e-16	3.72e-14	0.77	9.23	-8.75	2.53e-17	2.88e-15	7.08	1.44e-12	++?+++	1.66e-10	3.39e-08	1.56	1.25	0.6033	0.474	11	104876235	104925884	141	9	54162	-0.92	0.82191	-	1
6279	S100A8	NP_002955.2	0.63	11.93	-8.35	5.43e-16	3.79e-14	0.56	11.93	-9.12	1.33e-18	2.02e-16	6.24	4.52e-10	-+++++	1.59e-08	1.06e-05	3.25	1.81	0.5492		1	153342508	153415054	132	6	54162	-1.26	0.89596	-	1	Yes
10428	CFDP1	NP_006315.1	0.91	7.27	-8.34	5.56e-16	3.86e-14	0.92	7.27	-6.97	8.63e-12	2.57e-10	-1.72	0.0860346	++?---	0.144373	1	1.59	1.09			16	75307608	75487387	548	14	54162	1.1	0.13603	-	1
89846	FGD3	NP_149077.2	1.18	11.36	8.34	5.57e-16	3.86e-14	1.17	11.36	6.89	1.53e-11	4.22e-10	3.88	0.000102973	?+?+++	0.000442631	1	1.09	1.07			9	95689601	95818518	368	29	54162	-0.15	0.55989	+	1
7318	UBA7	NP_003326.2	1.17	8.99	8.34	5.84e-16	4.04e-14	1.19	8.99	8.23	1.28e-15	9.42e-14	3.15	0.00160845	??++++	0.0047303	1	1.18	1.11			3	49822638	49871391	55	8	54162	-1.21	0.88762	-	1
143884	CWF19L2	NP_689647.1	0.88	7.16	-8.32	6.68e-16	4.6e-14	0.88	7.16	-7.41	4.78e-13	1.91e-11	2.44	0.0145071	-++++-	0.0318694	1	0.68	0.97			11	107177071	107348572	609	23	54162	-0.48	0.68613	-	1
79991	OBFC1	NP_079204.1	0.89	7.9	-8.32	6.71e-16	4.61e-14	0.93	7.9	-4.96	9.32e-07	7.83e-06	-1.28	0.201517	---+--	0.293185	1	0.85	0.95			10	105617316	105698045	173	20	54162	0.73	0.2333	-	1
2000	ELF4	NP_001412.1	1.16	9.37	8.32	6.75e-16	4.63e-14	1.19	9.37	8.69	4.05e-17	4.35e-15	6.34	2.31e-10	++?+++	9.3e-09	5.43e-06	1.37	1.19		0.4747											Yes
8883	NAE1	NP_001018170.1	0.86	7.81	-8.3	7.62e-16	5.21e-14	0.84	7.81	-8.09	3.69e-15	2.48e-13	-3.8	0.000144318	--?---	0.00059119	1	0.61	0.85		-0.4247	16	66816781	66884880	93	7	54162	0.73	0.23416	-	1
114785	MBD6	NP_443129.3	1.22	9.46	8.3	7.9e-16	5.38e-14	1.26	9.46	8.35	5.18e-16	4.11e-14	4.32	1.54e-05	++?+++	8.64e-05	0.363363	1.78	1.19	0.6198	0.5215	12	57895463	57943931	51	4	54162	-0.2	0.57986	+	1
80135	BXDC5	NP_079341.2	0.9	7.08	-8.3	7.96e-16	5.41e-14	0.89	7.08	-8.55	1.19e-16	1.1e-14	-1.28	0.199819	+-?---	0.291129	1	1.29	1			1	84924920	84984033	232	25	54162	-0.66	0.7454	+	1
9550	ATP6V1G1	NP_004879.1	0.74	8.78	-8.29	8.14e-16	5.51e-14	0.68	8.78	-9.24	4.92e-19	8.3e-17	-3.79	0.000148814	-+?--+	0.000607369	1	0.79	0.93			9	117329994	117381152	162	21	54162	-0.05	0.52056	+	1
51020	HDDC2	NP_057147.2	0.85	8.27	-8.28	8.85e-16	5.98e-14	0.82	8.27	-8.47	2.19e-16	1.9e-14	1.77	0.0774042	-+?++-	0.131907	1	0.81	0.99			6	125576496	125643287	201	15	54162	-0.52	0.69872	-	1
10213	PSMD14	NP_005796.1	0.9	7.24	-8.28	9.06e-16	6.1e-14	0.9	7.24	-7.61	1.14e-13	5.26e-12	-4.4	1.06e-05	--?---	6.29e-05	0.249608	0.57	0.82			2	162144786	162288228	185	19	54162	-1.22	0.88847	+	1
7336	UBE2V2	NP_003341.1	0.89	7.32	-8.27	9.35e-16	6.28e-14	0.88	7.32	-7.93	1.14e-14	6.77e-13	-5.84	5.21e-09	------	1.13e-07	0.000122694	0.36	0.7	-0.6449	-0.5138	8	48900966	48997268	42	8	54162	0.07	0.47342	+	1
54065	C21orf51	NP_001035860.1	0.92	7.08	-8.27	9.7e-16	6.45e-14	0.91	7.08	-7.81	2.86e-14	1.53e-12	-5.12	3.02e-07	?-?---	3.08e-06	0.00709885	0.8	0.9			21	35727749	35781452	165	18	54162	0.72	0.23512	+	1	Yes
8559	PRPF18	NP_003666.1	0.94	6.84	-8.27	9.97e-16	6.61e-14	0.93	6.84	-7.88	1.72e-14	9.83e-13	-2.97	0.0029876	--?---	0.00813826	1	0.6	0.87			10	13608939	13692868	220	20	54162	-1.42	0.92217	+	1
84895	FAM73B	NP_116198.2	1.08	7.45	8.25	1.14e-15	7.52e-14	1.08	7.45	7.59	1.35e-13	6.09e-12	1.01	0.31178	++-++-	0.417826	1	1.13	1.03			9	131778899	131854361	72	14	54162	-0.59	0.72261	+	1
5527	PPP2R5C	NP_848703.1	0.88	8.08	-8.25	1.16e-15	7.63e-14	0.85	8.53	-8.18	1.82e-15	1.29e-13	-5.57	2.56e-08	--?---	4.12e-07	0.000601372	0.75	0.87	-0.672	-0.53	14	102206910	102414329	566	43	54162	-1.2	0.8851	+	1	Yes
51699	VPS29	NP_057310.1	0.8	8.69	-8.24	1.16e-15	7.64e-14	0.74	8.69	-9.8	4.7e-21	1.3e-18	-4.57	4.82e-06	--?---	3.21e-05	0.113349	0.67	0.86	-0.635	-0.5049	12	110909330	110959916	65	10	54162	0.02	0.49309	-	1
4697	NDUFA4	NP_002480.1	0.68	8.82	-8.24	1.17e-15	7.64e-14	0.62	8.82	-8.85	1.08e-17	1.3e-15	-3.86	0.000114642	-----+	0.000484468	1	0.65	0.87	-0.6474	-0.512	7	10951580	10999813	135	23	54162	0.48	0.31616	-	1
51642	MRPL48	NP_057139.1	0.92	6.9	-8.24	1.18e-15	7.72e-14	0.92	6.9	-7.16	2.59e-12	8.7e-11	-0.45	0.655874	-+?+--	0.741209	1	0.6	0.91			11	73478917	73595656	332	20	54162	0.39	0.34736	+	1
11262	SP140	NP_001005176.1	0.9	7.05	-8.23	1.26e-15	8.2e-14	0.91	7.05	-6.99	7.53e-12	2.27e-10	1.55	0.121126	???+++	0.192704	1	1.05	1.03			2	231070445	231197930	354	27	54162	0.65	0.25737	+	1
8896	BUD31	NP_003901.2	0.9	9.21	-8.23	1.29e-15	8.41e-14	0.91	9.21	-6.67	6.06e-11	1.47e-09	0.33	0.738478	--+---	0.808919	1	1.12	0.99			7	98986243	99037239	69	8	54162	1.8	0.036266	+	1
91057	CCDC34	NP_110398.1	0.91	7.21	-8.23	1.31e-15	8.47e-14	0.93	7.21	-5.83	9.29e-09	1.29e-07	-3.87	0.00010812	-+?---	0.000461047	1	0.58	0.83	-0.5958	-0.4698	11	27340061	27404795	158	24	54162	-1	0.84079	-	1	Yes
170622	COMMD6	NP_987093.1	0.6	8.03	-8.21	1.46e-15	9.4e-14	0.56	8.03	-8.32	6.82e-16	5.24e-14	1.39	0.164231	-+?++-	0.247635	1	0.74	0.94			13	76079350	76131991	140	17	54162	-1.32	0.90623	-	1
10307	APBB3	NP_573418.2	1.15	8.83	8.21	1.52e-15	9.75e-14	1.15	8.83	7.51	2.26e-13	9.86e-12	-6.71	1.91e-11	--?---	1.27e-09	4.5e-07	0.74	0.85	-0.6398	-0.5402	5	139917853	139964189	45	10	54162	3.51	0.00022614	-	1
3148	HMGB2	NP_002120.1	0.85	7.2	-8.2	1.56e-15	9.96e-14	0.81	7.2	-8.88	8.74e-18	1.06e-15	-0.11	0.91168	----++	0.938728	1	0.83	0.98			4	174232527	174275595	73	10	54162	-0.54	0.70561	-	1	Yes
55012	PPP2R3C	NP_060387.2	0.84	8.41	-8.2	1.57e-15	1e-13	0.8	8.41	-9.19	7.66e-19	1.22e-16	-0.03	0.974481	++-+--	0.982246	1	1.25	1.02			14	35534678	35611868	228	24	54162	0.07	0.47342	-	1
29078	C6orf66	NP_054884.1	0.93	6.94	-8.2	1.61e-15	1.02e-13	0.93	6.94	-7.99	7.63e-15	4.69e-13	-3.74	0.000185205	-+?---	0.000732538	1	0.69	0.87			6	97317187	97365767	142	20	54162	-0.98	0.83598	-	1
3684	ITGAM	NP_000623.2	1.22	9.46	8.19	1.72e-15	1.09e-13	1.16	9.46	5.34	1.35e-07	1.39e-06	5.96	2.52e-09	++?+++	6.44e-08	5.93e-05	1.32	1.18			16	31251288	31364213	236	15	54162	2.78	0.0027272	+	1	Yes
23350	SR140	NP_001073884.1	0.93	7.51	-8.19	1.79e-15	1.13e-13	0.95	7.51	-5.39	1.03e-07	1.1e-06	-3.93	8.54e-05	-+?--+	0.000375783	1	0.48	0.86	-0.4819	-0.4144	3	142700366	142799567	170	10	54162	-0.49	0.68721	+	1
79159	NOL12	NP_077289.1	1.11	7.94	8.19	1.8e-15	1.13e-13	1.1	7.94	6.68	5.77e-11	1.4e-09	-0.88	0.37962	++?--+	0.489101	1	1.24	1.05			22	38057680	38109718	132	19	54162	1.32	0.093766	+	1
6136	RPL12	NP_000967.1	0.84	11.9	-8.18	1.91e-15	1.19e-13	0.87	11.9	-5.81	1.07e-08	1.46e-07	-0.18	0.85852	--+-+-	0.900463	1	0.89	0.98			9	130189953	130233711	101	6	54162	0	0.50052	-	1
285381	DPH3	NP_001040899.1	0.89	7.22	-8.18	1.95e-15	1.21e-13	0.87	7.22	-8.86	1.03e-17	1.24e-15	0.78	0.433256	-+?+--	0.5418	1	0.78	0.96			3	16278568	16326496	145	15	54162	0.2	0.4191	-	1
79009	DDX50	NP_076950.1	0.89	7.16	-8.17	2.01e-15	1.25e-13	0.9	7.16	-7.05	5.23e-12	1.63e-10	-2.32	0.020265	-+----	0.0425366	1	0.62	0.92			10	70641034	70726603	191	19	54162	-0.45	0.67375	+	1
132160	PPM1M	NP_653242.1	1.11	9.83	8.15	2.39e-15	1.48e-13	1.1	9.83	6.6	9.37e-11	2.15e-09	2.46	0.0137589	--+++-	0.0304559	1	1.07	1.01			3	52259782	52304615	64	9	54162	-1.31	0.9043	+	1
54969	C4orf27	NP_060337.1	0.93	6.91	-8.14	2.49e-15	1.54e-13	0.93	6.91	-7.73	5.04e-14	2.47e-12	-4.33	1.5e-05	------	8.42e-05	0.352692	0.5	0.83			4	170630619	170699093	137	27	54162	-1.27	0.89769	-	1
53938	PPIL3	NP_570981.1	0.81	8.07	-8.14	2.51e-15	1.54e-13	0.79	8.07	-7.85	2.1e-14	1.16e-12	-3.43	0.000608553	------	0.00204356	1	0.73	0.89			2	201715630	201774048	72	13	54162	0.27	0.39262	-	1	Yes
64333	ARHGAP9	NP_001073626.1	1.18	11.19	8.14	2.55e-15	1.57e-13	1.14	11.19	5.79	1.14e-08	1.54e-07	5.9	3.56e-09	-+?+++	8.28e-08	8.37e-05	0.83	1.05			12	57846038	57902756	84	9	54162	0.28	0.38912	-	1
28957	MRPS28	NP_054737.1	0.91	6.88	-8.13	2.67e-15	1.64e-13	0.91	6.88	-7.84	2.18e-14	1.19e-12	-4.44	9e-06	-----?	5.47e-05	0.211704	0.49	0.81			8	80810952	80962516	150	14	54162	0.27	0.39494	-	1
84286	TMEM175	NP_115702.1	1.13	8.58	8.13	2.76e-15	1.69e-13	1.13	8.58	7.44	3.76e-13	1.54e-11	-3.65	0.000260789	-----+	0.000986079	1	0.89	0.95	-0.4972	-0.4502	4	906175	972444	146	22	54162	0.86	0.19525	+	1
8887	TAX1BP1	NP_001073333.1	0.76	8.86	-8.13	2.79e-15	1.7e-13	0.7	8.86	-9.21	6.46e-19	1.06e-16	-2.51	0.0121033	-+?--+	0.0272762	1	0.78	0.93			7	27758992	27889386	270	23	54162	-1.19	0.88265	+	1
10431	TIMM23	NP_006318.1	0.87	8.72	-8.12	2.9e-15	1.76e-13	0.87	8.72	-7.44	3.66e-13	1.51e-11	-4.27	1.98e-05	???--?	0.000106983	0.466875	0.78	0.84	-0.635	-0.5154
5706	PSMC6	NP_002797.2	0.77	7.66	-8.12	2.99e-15	1.82e-13	0.74	7.66	-8.38	4.29e-16	3.47e-14	-4.17	3.09e-05	------	0.00015595	0.726103	0.6	0.83			14	53153894	53214716	91	12	54162	2.23	0.012819	+	1
5108	PCM1	NP_006188.2	0.88	8.11	-8.11	3.19e-15	1.93e-13	0.88	8.11	-6.97	9.11e-12	2.69e-10	0.78	0.435471	+++--+	0.544027	1	1.22	1.05			8	17760364	17907457	617	23	54162	-0.39	0.65219	+	1
23275	POFUT2	NP_598368.2	1.1	7.68	8.1	3.35e-15	2.02e-13	1.09	7.79	6.63	7.73e-11	1.81e-09	0.48	0.632951	+-?++-	0.721542	1	1.16	1.01			21	46663843	46727811	225	11	54162	-1.17	0.87803	-	1
1345	COX6C	NP_004365.1	0.79	9.32	-8.1	3.42e-15	2.05e-13	0.82	9.32	-6.36	4.11e-10	7.99e-09	-3.47	0.000515347	-----+	0.00177005	1	0.57	0.87	-0.6198	-0.5197	8	100870223	100926242	90	10	54162	0.56	0.28698	-	1
84946	LTV1	NP_116249.2	0.91	7.47	-8.1	3.52e-15	2.11e-13	0.9	7.47	-8.21	1.45e-15	1.06e-13	-0.7	0.482235	-++---	0.58811	1	1.29	0.99			6	144144508	144204943	146	17	54162	-0.01	0.5038	+	1	Yes
6883	TAF12	NP_005635.1	0.9	7.76	-8.09	3.73e-15	2.23e-13	0.9	7.76	-7.5	2.47e-13	1.06e-11	2.91	0.00366572	?+?++-	0.00972756	1	1.09	1.05			1	28909608	28995416	92	12	54162	-1.66	0.95178	-	1
552900	BOLA2	NP_001026997.1	0.84	8.33	-8.09	3.74e-15	2.23e-13	0.82	8.33	-8.16	2.12e-15	1.5e-13	1.15	0.252163	++?++?	0.352193	1	1.07	1.03			16	29432601	29486285	3	1	54162	1.88	0.030007	-	1
55849	ALG13	NP_060936.1	0.89	7.18	-8.08	3.84e-15	2.28e-13	0.86	7.18	-8.98	4.07e-18	5.41e-16	-0.75	0.452455	???+-?	0.560064	1	0.92	0.97		-0.4423
9181	ARHGEF2	NP_004714.2	1.13	11.05	8.07	4.08e-15	2.42e-13	1.16	11.05	8.45	2.51e-16	2.16e-14	-2.82	0.00481482	-++---	0.012301	1	0.84	0.98			1	155896431	155973396	74	7	54162	-0.73	0.76834	-	1
55505	NOLA3	NP_061118.1	0.81	10.49	-8.06	4.65e-15	2.74e-13	0.75	10.49	-9.95	1.3e-21	4.36e-19	1.75	0.0802383	-+?+++	0.135919	1	0.84	0.99			15	34613917	34655362	173	17	54162	0.24	0.40535	-	1
29087	THYN1	NP_954995.1	0.91	7.79	-8.05	4.73e-15	2.77e-13	0.94	7.79	-4.45	1.04e-05	6.76e-05	-4.35	1.36e-05	--?---	7.72e-05	0.319186	0.49	0.83		-0.444	11	134098172	134143289	74	12	54162	-0.38	0.64945	-	1
93974	ATPIF1	NP_835498.1	0.9	7.48	-8.05	4.73e-15	2.77e-13	0.89	7.48	-7.7	5.94e-14	2.86e-12	-5.41	6.38e-08	--+--+	8.72e-07	0.00150229	0.55	0.83	-0.6761	-0.5922	1	28542602	28584616	124	9	54162	-1.37	0.91494	+	1
9443	CRSP9	NP_004261.1	0.92	6.92	-8.03	5.49e-15	3.2e-13	0.9	6.92	-8.25	1.1e-15	8.17e-14	-5.69	1.27e-08	--?---	2.33e-07	0.000299673	0.81	0.88	-0.6127	-0.4658	5	156545451	156589921	115	12	54162	0.28	0.39139	-	1
28977	MRPL42	NP_751917.1	0.94	6.9	-8.03	5.59e-15	3.25e-13	0.94	6.9	-7.44	3.67e-13	1.51e-11	-3.29	0.00100648	-+?---	0.00315598	1	0.83	0.93			12	93841266	93917548	203	17	54162	1.57	0.058096	+	1
11137	PWP1	NP_008993.1	0.9	8.03	-8.03	5.81e-15	3.37e-13	0.91	8.03	-6.16	1.4e-09	2.42e-08	-4.69	2.67e-06	------	1.94e-05	0.0628897	0.7	0.88			12	108059590	108126257	144	16	54162	-1.5	0.93273	+	1
9453	GGPS1	NP_001032354.1	0.89	7.94	-8.03	5.83e-15	3.38e-13	0.87	7.94	-8.5	1.64e-16	1.48e-14	0.16	0.87214	++?+--	0.909841	1	1.27	1.05		0.449	1	235471753	235527847	103	8	54162	0.04	0.48557	+	1
11222	MRPL3	NP_009139.1	0.79	7.91	-8	7.31e-15	4.2e-13	0.75	7.91	-8.32	6.45e-16	5e-14	-3.37	0.000744506	-----+	0.00243106	1	0.6	0.88		-0.463	3	131161045	131241860	151	19	54162	0.33	0.37093	-	1	Yes
8562	DENR	NP_003668.2	0.87	8.08	-8	7.32e-15	4.2e-13	0.85	8.08	-7.77	3.64e-14	1.86e-12	-5.94	2.89e-09	--?---	7.1e-08	6.8e-05	0.53	0.8	-0.6776	-0.5146	12	123217371	123275953	87	7	54162	0.26	0.39754	+	1	Yes
7419	VDAC3	NP_005653.3	0.88	9.82	-7.97	8.59e-15	4.92e-13	0.89	9.82	-6.5	1.77e-10	3.76e-09	-3.85	0.00012029	-+?---	0.000505432	1	0.43	0.78		-0.4693	8	42229279	42283455	93	11	54162	-0.01	0.50597	+	1
6170	RPL39	NP_000991.1	0.64	10.95	-7.97	8.88e-15	5.08e-13	0.66	10.95	-6.78	3.06e-11	7.87e-10	2.51	0.0122254	++++++	0.0275066	1	1.14	1.1
374403	TBC1D10C	NP_940919.1	1.13	10.43	7.96	9.56e-15	5.45e-13	1.15	10.43	7.79	3.25e-14	1.7e-12	0.61	0.542784	???+-+	0.6438	1	1.02	1			11	67151384	67197561	64	10	54162	1.12	0.1307	+	1
4068	SH2D1A	NP_002342.1	0.83	7.75	-7.96	9.78e-15	5.56e-13	0.83	7.75	-7.45	3.49e-13	1.46e-11	3.26	0.00112658	-+?+++	0.00347835	1	0.83	1.01
3608	ILF2	NP_004506.2	0.9	9.05	-7.95	9.83e-15	5.58e-13	0.91	9.05	-5.72	1.77e-08	2.28e-07	-2.16	0.0310557	---+--	0.061109	1	0.68	0.9			1	153614264	153663504	62	8	54162	-1.38	0.91645	-	1	Yes
79833	GEMIN6	NP_079051.9	0.91	7.02	-7.95	1.01e-14	5.69e-13	0.9	7.02	-8.02	6.15e-15	3.9e-13	-2.54	0.0111103	--+---	0.0253123	1	0.86	0.96			2	38985327	39029598	75	7	54162	0.6	0.27548	+	1
64983	MRPL32	NP_114109.1	0.87	7.37	-7.94	1.06e-14	5.96e-13	0.85	7.37	-8.43	2.93e-16	2.46e-14	-3.77	0.000163437	--+---	0.000657379	1	0.6	0.88			7	42951804	42997456	114	10	54162	0.68	0.24727	+	1
79023	NUP37	NP_076962.2	0.89	7.65	-7.94	1.08e-14	6.09e-13	0.86	7.65	-8.76	2.27e-17	2.6e-15	-1.04	0.296662	------	0.40166	1	0.77	0.94			12	102447967	102534025	173	21	54162	-0.21	0.58392	-	1
26156	RSL1D1	NP_056474.2	0.86	8.6	-7.93	1.14e-14	6.38e-13	0.89	8.6	-5.35	1.26e-07	1.31e-06	-5.49	4e-08	--?---	5.95e-07	0.000941403	0.75	0.88			16	11908053	11965442	128	14	54162	-0.3	0.61944	-	1	Yes
650518	LOC650518	XP_942378.1	0.74	8.51	-7.93	1.18e-14	6.57e-13	0.7	8.51	-8.33	6.14e-16	4.79e-14
402644	LOC402644	XP_943390.1	0.88	7.25	-7.92	1.29e-14	7.17e-13	0.87	7.25	-7.62	1.08e-13	5e-12
1653	DDX1	NP_004930.1	0.87	8.33	-7.91	1.36e-14	7.57e-13	0.86	8.33	-7.34	7.36e-13	2.81e-11	-4.69	2.79e-06	------	2.01e-05	0.0655864	0.58	0.83		-0.4611	2	15711745	15791235	217	18	54162	-0.67	0.74766	+	1	Yes
7324	UBE2E1	NP_872607.1	0.82	8.8	-7.9	1.48e-14	8.18e-13	0.76	8.8	-9.53	4.45e-20	1e-17	-1.03	0.302898	++?---	0.408318	1	1.12	1.02			3	23827384	23953131	235	29	54162	-0.09	0.53674	+	1
80145	THOC7	NP_079351.1	0.86	8.68	-7.9	1.5e-14	8.3e-13	0.84	8.68	-8.64	5.76e-17	5.78e-15	-5.76	8.46e-09	------	1.67e-07	0.000199115	0.66	0.85	-0.6777	-0.5409	3	63799546	63869597	91	17	54162	-0.25	0.5975	-	1
10923	SUB1	NP_006704.2	0.85	7.14	-7.89	1.52e-14	8.36e-13	0.83	7.14	-7.95	1.02e-14	6.13e-13	-7.05	1.85e-12	------	2.05e-10	4.36e-08	0.54	0.76	-0.7003	-0.5385	5	32565605	32624185	117	19	54162	-0.36	0.64217	+	1
64115	C10orf54	NP_071436.1	1.19	10.94	7.89	1.54e-14	8.49e-13	1.18	10.94	6.64	7.51e-11	1.77e-09	5.36	8.48e-08	++?+++	1.09e-06	0.00199462	1.79	1.28	0.6324	0.545	10	73487313	73553337	202	35	54162	0.41	0.33918	-	1
6499	SKIV2L	NP_008860.4	1.12	8.29	7.89	1.58e-14	8.68e-13	1.14	8.29	7.81	2.76e-14	1.49e-12	-0.86	0.388901	--?+-+	0.49795	1	0.85	0.97			6	31906581	31957532	118	24	54162	0.62	0.26671	+	1
54849	DEF8	NP_997397.1	1.17	10.1	7.88	1.71e-14	9.36e-13	1.14	10.1	5.96	4.44e-09	6.77e-08	-0.41	0.68368	++?--+	0.764482	1	1.15	1.03			16	89994560	90054468	213	23	54162	0.52	0.30311	+	1
23412	COMMD3	NP_036203.1	0.81	8.7	-7.88	1.71e-14	9.36e-13	0.76	8.7	-8.96	4.88e-18	6.3e-16	-2.86	0.00417159	--?---	0.0108774	1	0.64	0.89			10	22585312	22629246	16	2	54162	0.29	0.38662	+	1
346950	LOC346950	XP_294473.1	0.92	7.01	-7.88	1.75e-14	9.51e-13	0.92	7.01	-6.55	1.28e-10	2.79e-09	1.46	0.143682	???++?	0.221767	1	1.1	1.05
51315	KRCC1	NP_057702.1	0.87	7.62	-7.87	1.78e-14	9.69e-13	0.85	7.62	-7.7	5.93e-14	2.86e-12	2.86	0.00428231	+++++-	0.0111193	1	1.52	1.13		0.5465	2	88306724	88375315	118	14	54162	-1.93	0.97315	-	1
6921	TCEB1	NP_005639.1	0.88	8.21	-7.87	1.8e-14	9.76e-13	0.85	8.21	-9	3.46e-18	4.71e-16	-5.27	1.37e-07	------	1.6e-06	0.00321842	0.62	0.86	-0.6839	-0.5509	8	74837373	74904522	181	19	54162	1.24	0.10753	-	1
7009	TEGT	NP_003208.2	1.14	12.1	7.87	1.83e-14	9.89e-13	1.15	12.1	7.57	1.48e-13	6.64e-12	1.22	0.220588	+-?++-	0.315951	1	1.67	1.12	0.6112	0.499	12	50115293	50178717	140	11	54162	-0.12	0.54814	+	1
646900	LOC646900	XP_934955.1	0.93	6.82	-7.86	1.96e-14	1.05e-12	0.92	6.82	-7.28	1.12e-12	4.07e-11
6738	TROVE2	NP_001035829.1	1.08	7.45	7.85	2.16e-14	1.16e-12	1.09	7.45	7.21	1.79e-12	6.29e-11	4.79	1.67e-06	++?++-	1.31e-05	0.0393767	1.93	1.2		0.4559	1	193008552	193080907	109	12	54162	-0.51	0.69455	+	1
37	ACADVL	NP_001029031.1	1.14	9.85	7.84	2.19e-14	1.17e-12	1.16	9.85	7.73	5.06e-14	2.48e-12	3.93	8.57e-05	++?+++	0.000376425	1	2.08	1.23	0.6372	0.5165	17	7100444	7148586	51	8	54162	1.23	0.10878	+	1	Yes
79031	PDCL3	NP_076970.1	0.92	7.23	-7.84	2.2e-14	1.17e-12	0.92	7.23	-7.53	1.95e-13	8.59e-12	-2.76	0.00581301	???---	0.0144725	1	0.82	0.91			2	101159418	101213201	129	16	54162	0.16	0.43486	+	1	Yes
10240	MRPS31	NP_005821.1	0.87	7.77	-7.84	2.29e-14	1.22e-12	0.85	7.77	-8.35	5.15e-16	4.1e-14	0.42	0.67723	++--+-	0.759109	1	1.07	1.01			13	41283432	41365347	76	7	54162	-0.56	0.71231	-	1	Yes
10636	RGS14	NP_006471.2	1.1	7.49	7.83	2.33e-14	1.24e-12	1.06	7.49	4.14	3.95e-05	0.000222642	-2.73	0.00641532	--?--+	0.0157111	1	0.88	0.95			5	176764704	176819599	55	6	54162	0.14	0.44535	+	1
64780	MICAL1	NP_073602.2	1.16	8.7	7.83	2.37e-14	1.26e-12	1.18	8.7	7.86	1.93e-14	1.08e-12	-0.2	0.843667	++---+	0.890002	1	1.63	1.09			6	109745265	109807171	111	13	54162	1.82	0.034239	-	1
393	ARHGAP4	NP_001657.2	1.15	9.57	7.83	2.41e-14	1.28e-12	1.18	9.57	8.37	4.54e-16	3.65e-14	3.14	0.00168943	?+++++	0.00494062	1	1.09	1.05	-0.5834	-0.4904
80349	WDR61	NP_079510.1	0.89	8.01	-7.83	2.46e-14	1.3e-12	0.88	8.01	-7.2	1.91e-12	6.66e-11	-5.51	3.49e-08	------	5.32e-07	0.000821983	0.55	0.82	-0.6009	-0.4709	15	78555575	78611977	142	20	54162	-0.39	0.65329	-	1
6305	SBF1	NP_002963.1	1.14	8.76	7.82	2.66e-14	1.4e-12	1.19	8.76	9.42	1.11e-19	2.31e-17	-2.74	0.00621903	+-+---	0.0153181	1	1.42	1.02			22	50863429	50933467	159	25	54162	0.46	0.32265	-	1
401505	C9orf105	NP_001001790.1	0.9	6.95	-7.81	2.7e-14	1.42e-12	0.88	6.95	-7.79	3.22e-14	1.69e-12	-0.92	0.357192	-+?+-?	0.465558	1	0.54	0.86		0.4121	9	37568410	37612636	92	11	54162	0.58	0.28005	-	1
6760	SS18	NP_005628.2	0.9	7.35	-7.81	2.74e-14	1.44e-12	0.89	7.35	-7.83	2.42e-14	1.31e-12	-0.28	0.783187	--?-+-	0.843752	1	0.9	0.97		0.4949	18	23576217	23691176	220	14	54162	-0.46	0.67568	-	1
55847	CISD1	NP_060934.1	0.87	8.01	-7.81	2.76e-14	1.44e-12	0.85	8.01	-7.8	3.06e-14	1.62e-12	-4.85	1.24e-06	--?---	1.02e-05	0.0292785	0.43	0.75	-0.6331	-0.5132	10	60008862	60070752	181	10	54162	2.08	0.018659	+	1
83605	CCM2	NP_001025006.1	1.12	10.31	7.81	2.84e-14	1.48e-12	1.09	10.31	5.32	1.51e-07	1.55e-06	-2.52	0.0116782	+-?---	0.0264322	1	0.92	0.98		-0.4624	7	45019345	45136069	337	18	54162	0.36	0.35978	+	1
3101	HK3	NP_002106.1	1.19	9.16	7.8	2.96e-14	1.54e-12	1.15	9.16	5.65	2.57e-08	3.18e-07	4.34	1.41e-05	???+++	7.98e-05	0.331387	1.2	1.12			5	176287870	176346333	106	22	54162	-0.08	0.53093	-	1	Yes
5687	PSMA6	NP_002782.1	0.79	7.87	-7.8	2.98e-14	1.55e-12	0.75	7.87	-8.21	1.55e-15	1.11e-13	-1.94	0.0518786	??+--?	0.0942628	1	0.9	0.99			14	35727811	35806680	220	21	54162	-0.48	0.68362	+	1
34	ACADM	NP_000007.1	0.89	7.25	-7.8	3.03e-14	1.57e-12	0.88	7.25	-7.58	1.38e-13	6.23e-12	-3.27	0.00107388	-+----	0.00333798	1	0.9	0.95			1	76170043	76249355	268	15	54162	0.08	0.46989	+	1	Yes
2242	FES	NP_001996.1	1.18	8.87	7.79	3.16e-14	1.64e-12	1.18	8.87	6.74	3.8e-11	9.58e-10	4.68	2.91e-06	???+++	2.08e-05	0.0684823	1.15	1.09			15	91407665	91459006	110	18	54162	-0.22	0.58547	+	1
23234	DNAJC9	NP_056005.1	0.9	7.84	-7.79	3.18e-14	1.64e-12	0.91	7.84	-6.02	3.18e-09	5.01e-08	1.14	0.252935	-+-+++	0.352957	1	0.72	0.97		0.4596	10	74982582	75027025	85	1	54162	-1.04	0.8507	-	1
55860	ACTR10	NP_060947.1	0.88	7.93	-7.78	3.41e-14	1.75e-12	0.85	7.93	-8.55	1.17e-16	1.09e-14	-5.15	2.54e-07	--?---	2.67e-06	0.00597002	0.53	0.79	-0.6521	-0.4909	14	58646833	58722354	88	12	54162	1.55	0.060189	+	1
51128	SAR1B	NP_001028675.1	0.86	7.3	-7.78	3.47e-14	1.78e-12	0.83	7.3	-8.39	3.98e-16	3.26e-14	1.1	0.271054	++?-+-	0.373742	1	1.37	1.1			5	133916839	133988533	81	11	54162	-1.27	0.89835	-	1
6171	RPL41	NP_001030344.1	0.69	12.54	-7.78	3.53e-14	1.8e-12	0.7	12.54	-6.67	6.12e-11	1.48e-09	-5.23	1.66e-07	--?--+	1.88e-06	0.00389848	0.78	0.95	-0.6968	-0.5228	12	56490374	56531616	30	6	54162	-0.25	0.60015	+	1
509	ATP5C1	NP_005165.1	0.8	7.8	-7.77	3.61e-14	1.84e-12	0.75	7.8	-8.63	6.2e-17	6.16e-15	-5.47	4.53e-08	--+---	6.53e-07	0.00106493	0.41	0.79	-0.6386	-0.5201	10	7810093	7869764	167	18	54162	-0.84	0.79911	+	1
6494	SIPA1	NP_006738.2	1.16	9.78	7.77	3.62e-14	1.85e-12	1.18	9.78	7.95	1.01e-14	6.09e-13	6.11	1.01e-09	?+?++?	3.05e-08	2.37e-05	1.38	1.23	0.6993	0.5608	11	65385578	65438391	71	13	54162	0.72	0.23688	+	1
51264	MRPL27	NP_683412.1	0.91	7.41	-7.77	3.65e-14	1.85e-12	0.92	7.41	-5.74	1.5e-08	1.97e-07	-0.59	0.554593	-+?+-+	0.654444	1	0.63	0.92			17	48425228	48470562	134	12	54162	-0.33	0.62833	-	1
51074	APIP	NP_057041.1	0.89	7.16	-7.75	4.31e-14	2.18e-12	0.87	7.16	-8.52	1.42e-16	1.3e-14	3.22	0.00127298	-+?+++	0.00386438	1	0.81	1.02			11	34883842	34957939	375	14	54162	1.27	0.10231	-	1
6156	RPL30	NP_000980.1	0.78	11.99	-7.75	4.43e-14	2.23e-12	0.78	11.99	-7.03	6.02e-12	1.87e-10	4.29	1.82e-05	++++++	9.96e-05	0.429278	1.2	1.12			8	99033938	99077818	91	17	54162	-0.81	0.78982	-	1	Yes
56942	C16orf61	NP_064573.1	0.83	8.03	-7.75	4.44e-14	2.23e-12	0.8	8.03	-8.43	2.93e-16	2.46e-14	-3.59	0.000333057	-+----	0.00121595	1	0.83	0.93			16	80989699	81060713	341	11	54162	-1.03	0.84858	-	1
6124	RPL4	NP_000959.2	0.8	10.64	-7.74	4.47e-14	2.25e-12	0.83	10.64	-5.65	2.57e-08	3.18e-07	1.97	0.049149	??+-++	0.0900191	1	1.14	1.09			15	66771653	66836870	180	19	54162	-2.05	0.97997	-	1	Yes
84280	BTBD10	NP_115696.2	0.9	7.47	-7.74	4.66e-14	2.34e-12	0.89	7.47	-7.8	2.94e-14	1.57e-12	-4.62	3.88e-06	--?---	2.66e-05	0.0913394	0.53	0.8	-0.6197	-0.5195	11	13389555	13504838	241	15	54162	-1.46	0.92845	-	1
533	ATP6V0B	NP_004038.1	1.15	11.2	7.74	4.75e-14	2.38e-12	1.09	11.2	4.17	3.57e-05	0.000203396	0.16	0.869402	--?++-	0.907991	1	0.61	0.91			1	44420118	44463972	57	8	54162	-0.01	0.50509	+	1
10299	2006-03-01	NP_005876.2	1.21	8.66	7.73	4.93e-14	2.46e-12	1.23	8.66	7.7	6.29e-14	3.03e-12	2.37	0.0177746	-++++-	0.037942	1	0.72	1			5	10333751	10460500	116	6	54162	-0.45	0.67184	+	1
65056	GPBP1	NP_075064.1	0.83	8.23	-7.73	5.01e-14	2.5e-12	0.81	8.23	-8.03	5.79e-15	3.72e-13	-0.6	0.551437	-+--+-	0.651535	1	1.06	0.99			5	56449676	56580506	174	20	54162	-0.02	0.50655	+	1
84186	ZCCHC7	NP_115602.2	0.87	7.71	-7.73	5.08e-14	2.52e-12	0.84	7.71	-8.8	1.71e-17	2.01e-15	-5.71	1.13e-08	+-?---	2.14e-07	0.000266689	1.47	1.01			9	37100161	37378146	345	19	54162	-0.41	0.65873	+	1	Yes
54499	TMCO1	NP_061899.1	0.75	8.31	-7.73	5.1e-14	2.53e-12	0.7	8.31	-8.4	3.54e-16	2.95e-14	-3.26	0.00109607	--?---	0.00339528	1	0.75	0.91			1	165673528	165758159	172	22	54162	-1.92	0.97251	-	1
9933	KIAA0020	NP_055693.4	0.9	7.28	-7.72	5.31e-14	2.63e-12	0.89	7.28	-7.45	3.62e-13	1.5e-11	2.17	0.0299343	--?++-	0.0592192	1	0.88	0.98			9	2784152	2864130	166	21	54162	1.42	0.07766	-	1	Yes
7270	TTF1	NP_031370.2	0.94	7.1	-7.72	5.47e-14	2.7e-12	0.95	7.1	-5.73	1.61e-08	2.1e-07	-1.27	0.203739	+-+---	0.296052	1	1.57	1.06			9	135230935	135302238	148	21	54162	0.51	0.30609	-	1
84458	LCOR	NP_115816.1	1.1	8	7.71	5.53e-14	2.72e-12	1.06	8	4.53	7.12e-06	4.85e-05	1.75	0.0807249	+++++-	0.136647	1	1.35	1.1			10	98572017	98744198	161	8	54162	0.23	0.40812	+	1
643997	LOC643997	XP_292963.5	0.91	7.12	-7.7	5.95e-14	2.93e-12	0.91	7.12	-6.96	9.21e-12	2.71e-10	-2.43	0.0152294	???--?	0.0331865	1	0.86	0.91
84987	C12orf62	NP_116290.1	0.93	7.01	-7.7	5.99e-14	2.94e-12	0.93	7.01	-7.13	3.01e-12	9.92e-11	-1.45	0.145712	-++--+	0.22443	1	0.79	0.95		-0.4419	12	50483418	50534240	68	6	54162	-0.28	0.6105	+	1
6191	RPS4X	NP_000998.1	0.83	11.36	-7.7	6.01e-14	2.94e-12	0.88	11.36	-4.77	2.31e-06	1.78e-05	2.58	0.00978111	-+++++	0.0226369	1	0.73	1.01													Yes
55848	C9orf46	NP_060935.1	0.89	7.83	-7.69	6.35e-14	3.1e-12	0.86	7.83	-8.62	6.68e-17	6.61e-15	-4.1	4.2e-05	?-?---	0.000204199	0.988322	0.91	0.92			9	5337966	5458381	370	33	54162	0.7	0.24053	-	1
3396	ICT1	NP_001536.1	0.92	7.24	-7.69	6.5e-14	3.17e-12	0.91	7.24	-7.25	1.38e-12	4.97e-11	-4.34	1.42e-05	--+---	8.05e-05	0.334953	0.82	0.94			17	72988760	73037356	121	16	54162	3.97	3.67e-05	+	0.669004
23550	PSD4	NP_036587.2	1.15	8.61	7.69	6.54e-14	3.18e-12	1.16	8.61	7.23	1.62e-12	5.75e-11	2.7	0.00688862	?+?+++	0.0167295	1	1.09	1.04			2	113894976	113980677	237	42	54162	1.11	0.13375	+	1
338758	LOC338758	XP_936452.1	1.17	9	7.69	6.66e-14	3.23e-12	1.16	9	6.46	2.32e-10	4.82e-09	-6.07	1.26e-09	--?--?	3.69e-08	2.96e-05	0.75	0.79
51611	DPH5	NP_001070862.1	0.9	7.13	-7.68	6.84e-14	3.3e-12	0.91	7.13	-6.02	3.12e-09	4.93e-08	-3.27	0.00108396	-+?--+	0.0033644	1	0.63	0.89			1	101435179	101511365	90	9	54162	-0.61	0.72896	-	1	Yes
91289	LMF2	NP_149977.1	1.11	8.16	7.68	7.07e-14	3.41e-12	1.14	8.16	8.59	8.73e-17	8.38e-15	-0.76	0.446888	+-+--+	0.554896	1	0.96	1			22	50921376	50966148	117	24	54162	0.72	0.23511	-	1
55813	UTP6	NP_060898.2	0.88	8.16	-7.68	7.14e-14	3.44e-12	0.88	8.16	-7.34	7.7e-13	2.94e-11	-1.6	0.109289	+-?--+	0.176606	1	1.11	1			17	30170190	30248729	164	14	54162	2.01	0.022321	-	1
150684	COMMD1	NP_689729.1	0.91	8.42	-7.67	7.39e-14	3.55e-12	0.93	8.42	-5	7.68e-07	6.6e-06	-1	0.316605	--?+-+	0.423088	1	0.73	0.93			2	62095904	62383205	500	33	54162	-0.39	0.65089	+	1
6990	DYNLT3	NP_006511.1	0.88	7.09	-7.67	7.59e-14	3.63e-12	0.86	7.09	-8.15	2.43e-15	1.69e-13	-4.79	1.71e-06	------	1.33e-05	0.0401391	0.52	0.8	-0.5994	-0.4763
27247	NFU1	NP_001002755.1	0.91	7.3	-7.67	7.7e-14	3.68e-12	0.9	7.3	-7.18	2.18e-12	7.49e-11	-4.61	3.94e-06	-+?---	2.7e-05	0.0926809	0.51	0.82	-0.5966	-0.4514	2	69603245	69684760	154	9	54162	0.83	0.20334	-	1
9978	RBX1	NP_055063.1	0.77	8.29	-7.67	7.74e-14	3.69e-12	0.75	8.29	-7.52	2.15e-13	9.42e-12	-5.01	5.53e-07	------	5.15e-06	0.0130161	0.65	0.89			22	41327351	41389019	41	9	54162	2.37	0.0088044	+	1
4666	NACA	NP_005585.1	0.88	12.28	-7.66	8.31e-14	3.96e-12	0.85	11.09	-5.7	1.9e-08	2.42e-07	1.34	0.179131	-+++++	0.265954	1	0.79	1.01			12	57086211	57139326	67	8	54162	-1.06	0.85618	-	1	Yes
7555	CNBP	NP_003409.1	0.83	9.44	-7.65	8.41e-14	4e-12	0.81	9.44	-7.95	1.03e-14	6.16e-13	-1.75	0.0800716	-+---+	0.135702	1	0.65	0.92			3	128866658	128922810	51	9	54162	-0.04	0.51732	-	1
9013	TAF1C	NP_647610.1	1.16	8.86	7.65	8.64e-14	4.09e-12	1.14	8.86	6.14	1.55e-09	2.63e-08	4.69	2.74e-06	+++++-	1.97e-05	0.0643779	1.46	1.13	0.6137	0.4599	16	84191453	84240676	295	30	54162	-0.41	0.66038	-	1
644162	LOC644162	XP_939049.1	0.89	7.92	-7.65	8.65e-14	4.09e-12	0.88	7.92	-7.68	7.1e-14	3.4e-12
2799	GNS	NP_002067.1	1.17	11.15	7.64	9.09e-14	4.29e-12	1.17	11.15	6.77	3.24e-11	8.3e-10	-1.41	0.158682	+-?--+	0.240843	1	1.26	1			12	65087222	65173226	117	12	54162	2.12	0.017149	-	1	Yes
5557	PRIM1	NP_000937.1	0.92	7.19	-7.64	9.29e-14	4.38e-12	0.93	7.19	-6.37	3.98e-10	7.76e-09	0.17	0.862639	-+?++-	0.903495	1	0.75	0.94	-0.53	-0.4378	12	57105364	57166146	61	7	54162	-0.89	0.81305	-	1	Yes
6165	RPL35A	NP_000987.2	0.8	11.42	-7.64	9.31e-14	4.38e-12	0.81	11.42	-6.58	1.08e-10	2.42e-09	2.17	0.0301084	++++++	0.0594894	1	1.44	1.09			3	197657023	197702722	113	12	54162	0.71	0.23735	+	1
9678	PHF14	NP_001007158.1	0.93	7.08	-7.64	9.64e-14	4.52e-12	0.94	7.02	-5.21	2.62e-07	2.52e-06	-4.52	6.05e-06	-+?---	3.9e-05	0.142365	0.52	0.81	-0.6513	-0.4965	7	10993495	11229250	567	24	54162	0.65	0.25665	+	1	Yes
114790	STK11IP	NP_443134.2	1.09	7.54	7.63	9.87e-14	4.62e-12	1.12	7.54	8.42	3.19e-16	2.67e-14	4	6.21e-05	-+?++-	0.000286381	1	1.08	1.04			2	220442593	220501173	49	12	54162	-1.32	0.90654	+	1
79958	DENND1C	NP_079174.2	1.13	7.97	7.63	9.94e-14	4.65e-12	1.18	7.97	9.07	1.95e-18	2.82e-16	1.28	0.200065	++?+++	0.291379	1	1.06	1.03			19	6447218	6501798	107	19	54162	-0.95	0.82859	-	1
65010	SLC26A6	NP_602298.2	1.09	7.38	7.63	1.02e-13	4.77e-12	1.08	7.38	5.72	1.71e-08	2.21e-07	6.32	2.57e-10	++?+++	1.02e-08	6.04e-06	1.66	1.24	0.6925	0.5718	3	48643156	48692926	38	4	54162	0.55	0.29171	-	1	Yes
57799	RAB40C	NP_066991.2	1.14	9.15	7.62	1.09e-13	5.08e-12	1.14	9.15	6.95	1.03e-11	2.97e-10	-5.56	2.68e-08	+-?---	4.28e-07	0.0006307	1.56	0.99	-0.6034	-0.5204	16	619357	699273	193	8	54162	1.14	0.12638	+	1
79898	ZNF613	NP_079116.2	0.91	7.08	-7.61	1.12e-13	5.22e-12	0.91	7.08	-6.97	8.86e-12	2.62e-10	2.82	0.00478536	???++-	0.0122351	1	1.05	1.01			19	52410688	52469011	187	18	54162	0.49	0.31079	+	1
58493	C9orf80	NP_067041.1	0.91	7.31	-7.61	1.15e-13	5.32e-12	0.91	7.31	-6.9	1.35e-11	3.79e-10	-3.57	0.000350756	-++---	0.00127287	1	0.47	0.88			9	115428786	115500387	134	18	54162	-1.53	0.93739	-	1
59348	ZNF350	NP_067645.3	0.93	6.95	-7.61	1.16e-13	5.37e-12	0.92	6.95	-8.02	6e-15	3.82e-13	2.58	0.00998015	++?++-	0.0230386	1	1.13	1.05		0.4433	19	52447593	52510079	207	17	54162	0.01	0.4963	-	1
645688	LOC645688		0.85	9.79	-7.6	1.2e-13	5.55e-12	0.87	9.79	-5.47	6.77e-08	7.52e-07
3312	HSPA8	NP_006588.1	0.84	10.58	-7.6	1.27e-13	5.85e-12	0.88	10.58	-4.99	8.2e-07	6.96e-06	-1.22	0.221976	??+--?	0.31761	1	0.84	0.96			11	122908200	122953074	145	15	54162	0.54	0.29437	-	1	Yes
6125	RPL5	NP_000960.2	0.78	9.8	-7.59	1.29e-13	5.95e-12	0.78	9.8	-6.71	4.82e-11	1.18e-09	0.55	0.583085	???++?	0.678985	1	1.02	1.01			1	93277594	93327481	65	7	54162	0.58	0.28031	+	1	Yes
26472	PPP1R14B	NP_619634.1	1.1	8.33	7.57	1.5e-13	6.88e-12	1.1	8.33	6.8	2.69e-11	7.02e-10	5.25	1.55e-07	++?+++	1.78e-06	0.00365495	1.53	1.2	0.6468	0.4836	11	63991951	64034413	69	14	54162	0.59	0.27806	-	1
79180	EFHD2	NP_077305.2	1.15	11.91	7.56	1.64e-13	7.49e-12	1.12	11.91	5.62	2.94e-08	3.6e-07	-2.89	0.00380993	-----?	0.0100536	1	0.72	0.88		-0.4761	1	15716391	15776839	135	27	54162	1.55	0.060796	+	1	Yes
23265	EXOC7	NP_001013861.1	1.11	8.81	7.56	1.64e-13	7.49e-12	1.14	8.81	8.3	7.65e-16	5.82e-14	-0.3	0.762855	+-?+--	0.827646	1	1.32	1.02			17	74057086	74119868	89	6	54162	0.81	0.20783	-	1
9126	SMC3	NP_005436.1	0.88	7.65	-7.56	1.66e-13	7.57e-12	0.89	7.65	-6.61	9.17e-11	2.12e-09	4.96	7.17e-07	++?++-	6.36e-06	0.0168772	4.88	1.46	0.6423	0.5879	10	112307449	112384392	205	18	54162	0.57	0.28507	+	1
9521	EEF1E1	NP_004271.1	0.89	7	-7.55	1.71e-13	7.76e-12	0.87	7	-8.15	2.28e-15	1.61e-13	-4.46	8.03e-06	-----?	4.98e-05	0.189054	0.46	0.78			6	8053593	8122828	201	25	54162	0.65	0.25675	-	1
5580	PRKCD	NP_006245.2	1.17	10.65	7.55	1.8e-13	8.18e-12	1.14	10.65	5.86	8.08e-09	1.14e-07	-4.27	1.95e-05	?-?---	0.000105513	0.458421	0.81	0.9			3	53175223	53246733	161	24	54162	-1.17	0.87985	+	1
23429	RYBP	NP_036366.3	1.19	9.72	7.54	1.82e-13	8.22e-12	1.19	9.72	6.65	6.81e-11	1.62e-09	0.79	0.430615	++?-+-	0.539042	1	1.35	1.09			3	72403744	72515774	137	24	54162	0.58	0.2798	-	1
3094	HINT1	NP_005331.1	0.67	9.04	-7.54	1.83e-13	8.24e-12	0.63	9.04	-7.8	3.08e-14	1.63e-12	-3.59	0.00033602	--?--+	0.00122601	1	0.49	0.82	-0.647	-0.5146	5	130474976	130521041	107	7	54162	0.4	0.34277	-	1
2963	GTF2F2	NP_004119.1	0.88	7.65	-7.54	1.85e-13	8.34e-12	0.85	7.65	-8.13	2.74e-15	1.89e-13	-1.18	0.238455	++----	0.336584	1	1.1	1			13	45674631	45878240	308	12	54162	1.13	0.12862	+	1
3687	ITGAX	NP_000878.2	1.23	9.87	7.54	1.92e-13	8.65e-12	1.23	9.87	6.52	1.53e-10	3.29e-09	3.16	0.00159996	???+++	0.00470764	1	1.12	1.08			16	31346488	31414320	137	18	54162	1.82	0.034444	+	1
25994	HIGD1A	NP_001093138.1	0.87	7.7	-7.54	1.93e-13	8.67e-12	0.81	7.89	-7.96	9.24e-15	5.61e-13	-4.23	2.39e-05	------	0.000125201	0.561779	0.54	0.82	-0.6598	-0.5639	3	42804400	42866027	94	13	54162	0.16	0.43581	-	1
9170	EDG4	NP_004711.2	1.2	9.42	7.54	1.94e-13	8.7e-12	1.22	9.42	7.09	4.01e-12	1.28e-10	0.87	0.382384	?-?+++	0.49172	1	0.96	1			19	19714464	19759039	71	13	54162	-1.37	0.9141	-	1
79590	MRPL24	NP_663781.1	0.91	8.17	-7.53	2.03e-13	9.07e-12	0.9	8.17	-7.18	2.24e-12	7.67e-11	-6.25	4.23e-10	-----+	1.51e-08	9.94e-06	0.61	0.83			1	156687094	156730923	68	12	54162	2.05	0.020174	-	1	Yes
79415	C17orf62	NP_001093878.1	1.14	9.84	7.53	2.03e-13	9.07e-12	1.16	9.84	7.78	3.38e-14	1.76e-12	2.24	0.0253629	+-?+++	0.0514341	1	1.55	1.13			17	80380462	80428707	115	10	54162	-1.22	0.88874	-	1
84067	C11orf56	NP_001092264.1	1.11	7.96	7.52	2.2e-13	9.77e-12	1.12	7.96	6.86	1.78e-11	4.84e-10	-5.6	2.09e-08	--?---	3.49e-07	0.000491164	0.72	0.86			11	6212564	6275941	112	17	54162	0.47	0.32058	-	1	Yes
55003	PAK1IP1	NP_060376.2	0.91	7.35	-7.52	2.24e-13	9.9e-12	0.92	7.35	-6.15	1.45e-09	2.49e-08	-3.44	0.000572283	++?---	0.00193845	1	1.41	1			6	10675180	10730015	28	6	54162	0.7	0.24173	+	1	Yes
80305	TRABD	NP_079480.2	1.13	10.38	7.51	2.25e-13	9.95e-12	1.11	10.38	5.81	1.05e-08	1.43e-07	7.07	1.53e-12	+-++++	1.75e-10	3.6e-08	1.37	1.14	0.7372	0.5698	22	50604344	50658027	164	25	54162	-0.69	0.75603	+	1
29950	SERTAD1	NP_037508.2	1.13	8.47	7.51	2.32e-13	1.02e-11	1.16	8.47	8.12	2.83e-15	1.94e-13	5.61	2.03e-08	++?+++	3.41e-07	0.000476622	1.37	1.15	0.6368	0.4944	19	40908408	40951932	74	11	54162	-0.22	0.58825	-	1
653702	LOC653702	NP_001087232.1	0.92	6.84	-7.51	2.36e-13	1.04e-11	0.93	6.84	-5.75	1.43e-08	1.89e-07
39	ACAT2	NP_005882.2	0.92	7.58	-7.51	2.37e-13	1.04e-11	0.91	7.58	-6.7	5.14e-11	1.26e-09	-3.51	0.000449726	-+----	0.00157307	1	0.61	0.86			6	160162989	160220087	167	13	54162	-1.16	0.87613	+	1
285148	IAH1	NP_001034702.1	0.88	7.73	-7.5	2.46e-13	1.08e-11	0.86	7.73	-7.48	2.88e-13	1.21e-11	-2.62	0.00879177	-+?---	0.0206581	1	0.75	0.94			2	9594670	9648604	99	7	54162	-0.17	0.56559	+	1
5464	PPA1	NP_066952.1	0.81	8.84	-7.5	2.55e-13	1.12e-11	0.81	8.84	-6.94	1.1e-11	3.16e-10	0.86	0.391722	-+?+--	0.500473	1	0.58	0.91			10	71942586	72013667	234	26	54162	0.97	0.16494	-	1	Yes
11025	LILRB3	NP_006855.2	1.21	11.68	7.5	2.56e-13	1.12e-11	1.18	11.68	5.77	1.29e-08	1.73e-07	5.61	2.04e-08	???++?	3.43e-07	0.000480998	1.9	1.58	0.6143		19	54700147	54746997	114	10	54162	0.71	0.24002	-	1
6778	STAT6	NP_003144.3	1.17	9.03	7.5	2.57e-13	1.12e-11	1.13	9.03	5.05	5.83e-07	5.15e-06	2.27	0.0231716	--?+++	0.0476764	1	0.84	1			12	57469187	57525196	86	17	54162	-1.06	0.85517	-	1
10393	ANAPC10	NP_055700.2	0.93	6.86	-7.49	2.62e-13	1.14e-11	0.91	6.86	-8.65	5.38e-17	5.46e-15	-4.43	9.45e-06	--?---	5.71e-05	0.222452	0.66	0.87			4	145895727	146039693	111	16	54162	2.46	0.0069296	-	1
58986	TMEM8	NP_067082.1	1.17	8.71	7.48	2.77e-13	1.2e-11	1.16	8.71	6.31	5.68e-10	1.07e-08	-0.62	0.533812	++?--+	0.635626	1	1.07	1.01			16	400776	451950	217	25	54162	2.17	0.01485	-	1
23016	EXOSC7	NP_055819.1	0.92	7.48	-7.46	3.33e-13	1.44e-11	0.94	7.48	-5.17	3.33e-07	3.13e-06	-5.18	2.16e-07	------	2.35e-06	0.00508707	0.63	0.86			3	44997741	45074160	150	16	54162	2.01	0.022118	+	1
91304	C19orf6	NP_001028198.1	1.11	8.05	7.45	3.4e-13	1.46e-11	1.1	8.05	6.37	3.87e-10	7.58e-09	-0.68	0.493857	--?-++	0.598961	1	0.88	0.97			19	989650	1041173	241	31	54162	2.91	0.0018294	-	1
5880	RAC2	NP_002863.1	1.13	12.72	7.45	3.51e-13	1.51e-11	1.11	12.72	5.98	3.9e-09	6.02e-08	4.24	2.28e-05	?+?+++	0.000120422	0.536481	1.15	1.11			22	37601301	37660339	215	28	54162	-0.24	0.59502	-	1
4927	NUP88	NP_002523.2	0.88	8.03	-7.44	3.64e-13	1.56e-11	0.88	8.03	-6.67	6e-11	1.45e-09	-0.47	0.638959	-++---	0.726781	1	0.82	0.97			17	5269346	5343400	282	8	54162	3.02	0.0012673	-	1	Yes
11214	AKAP13	NP_009131.2	1.14	9.38	7.44	3.72e-13	1.59e-11	1.14	9.38	6.86	1.86e-11	5.01e-10	5.95	2.71e-09	+-?+++	6.77e-08	6.38e-05	2.1	1.23			15	85903818	86312589	1381	42	54162	1.95	0.025772	+	1	Yes
6418	SET	NP_003002.1	0.87	9.01	-7.44	3.81e-13	1.63e-11	0.84	9.01	-8.14	2.56e-15	1.77e-13	-2.1	0.0357375	-+?---	0.068904	1	0.67	0.91			9	131425934	131478675	22	7	54162	0.73	0.23187	+	1	Yes
51335	NGRN	NP_057729.1	0.89	8.88	-7.43	4e-13	1.7e-11	0.9	8.88	-6.17	1.32e-09	2.29e-08	-2.61	0.00904255	-+?--+	0.0211586	1	0.72	0.92	-0.6263	-0.4683	15	90788895	90835443	118	11	54162	-0.04	0.51677	+	1
1877	E4F1	NP_004415.2	1.11	8.49	7.43	4.01e-13	1.7e-11	1.11	8.49	6.99	7.95e-12	2.38e-10	-1.48	0.138798	+-?--+	0.215743	1	0.94	0.99			16	2253490	2305743	85	11	54162	0.28	0.39051	+	1
25900	IFFO	NP_542768.1	1.12	8.99	7.42	4.36e-13	1.85e-11	1.09	8.99	4.8	2.05e-06	1.59e-05	-0.69	0.488579	-+---+	0.59423	1	0.78	0.96			12	6628694	6685249	107	15	54162	2.08	0.018795	-	1
805	CALM2	NP_001734.1	0.83	10.87	-7.42	4.42e-13	1.87e-11	0.77	10.87	-8.98	3.98e-18	5.33e-16	-4.04	5.35e-05	------	0.000251165	1	0.64	0.86			2	47367221	47424229	141	20	54162	1.13	0.12909	-	1
9166	EBAG9	NP_936056.1	0.87	7.92	-7.41	4.48e-13	1.89e-11	0.85	7.92	-7.79	3.25e-14	1.7e-12	-2.7	0.00699713	-++---	0.016956	1	0.71	0.93			8	110531929	110598225	114	15	54162	-0.83	0.79675	+	1	Yes
5889	RAD51C	NP_002867.1	0.95	6.81	-7.41	4.56e-13	1.92e-11	0.93	7.01	-7.06	5.03e-12	1.58e-10	-7.23	4.86e-13	------	7.68e-11	1.14e-08	0.68	0.79	-0.6139	-0.5484	17	56749934	56831703	137	16	54162	1.42	0.077551	+	1
54468	FLJ20323	NP_061878.3	0.92	7.2	-7.41	4.65e-13	1.95e-11	0.92	7.2	-6.66	6.56e-11	1.58e-09	1.63	0.103053	-+?++-	0.167925	1	0.74	0.95			7	7586522	7667112	242	19	54162	-0.64	0.73858	+	1
5695	PSMB7	NP_002790.1	0.9	8.18	-7.41	4.69e-13	1.96e-11	0.91	8.18	-5.83	9.41e-09	1.3e-07	-5.14	2.8e-07	------	2.9e-06	0.00659417	0.61	0.86	-0.6458	-0.5095	9	127095744	127197752	135	15	54162	-0.44	0.67152	-	1
8408	ULK1	NP_003556.1	1.18	10.03	7.41	4.76e-13	1.99e-11	1.17	10.03	6.34	4.69e-10	9e-09	1.38	0.166794	--+-++	0.250809	1	1.2	1.02			12	132359279	132427707	123	12	54162	0.09	0.46415	+	1
7385	UQCRC2	NP_003357.2	0.9	7.52	-7.4	4.89e-13	2.04e-11	0.9	7.52	-6.24	8.51e-10	1.54e-08	-5.64	1.72e-08	--?--+	3e-07	0.000405003	0.59	0.82	-0.6528	-0.5342	16	21944609	22014668	38	5	54162	-0.01	0.50574	+	1
26019	UPF2	NP_542166.1	0.88	8.82	-7.4	4.94e-13	2.06e-11	0.87	8.82	-7.26	1.31e-12	4.72e-11	0.53	0.592738	-+-++-	0.68726	1	0.8	0.95			10	11942021	12105169	510	23	54162	0.2	0.42194	-	1
55246	CCDC25	NP_060716.2	0.94	6.85	-7.4	4.97e-13	2.07e-11	0.94	6.85	-7	7.45e-12	2.25e-10	-2.18	0.029332	--?+--	0.0581843	1	0.63	0.87			8	27570833	27650170	266	15	54162	1.01	0.15593	-	1
53917	RAB24	NP_570137.1	1.14	8.04	7.4	5.12e-13	2.13e-11	1.12	8.04	5.65	2.56e-08	3.17e-07	3.4	0.000675989	-+?++?	0.00224123	1	0.79	0.97			5	176708199	176750744	80	15	54162	0.3	0.38087	-	1	Yes
8649	MAP2K1IP1	NP_068805.1	0.8	7.88	-7.39	5.21e-13	2.16e-11	0.73	7.88	-9.17	8.42e-19	1.31e-16	-2.86	0.00427795	------	0.0111116	1	0.51	0.84			4	100779495	100835703	88	16	54162	0.9	0.18315	-	1
28998	MRPL13	NP_054797.2	0.89	7.05	-7.39	5.3e-13	2.19e-11	0.87	7.05	-8.19	1.74e-15	1.25e-13	-3.71	0.000206785	------	0.000805706	1	0.65	0.87			8	121388083	121477647	128	12	54162	-0.01	0.50492	-	1
11321	XAB1	NP_009197.1	0.89	8.26	-7.38	5.54e-13	2.29e-11	0.9	8.26	-5.62	3.06e-08	3.73e-07	-3.72	0.000200003	--?---	0.000781741	1	0.59	0.85			2	27831515	27893713	86	9	54162	-0.56	0.71368	+	1
90379	LOC90379	NP_612362.2	1.08	7.75	7.38	5.62e-13	2.32e-11	1.07	7.75	5.46	7.13e-08	7.85e-07	-1.01	0.313226	--?++-	0.419286	1	0.83	0.94			19	14043319	14092256	27	9	54162	-1.3	0.90244	+	1
23294	ANKS1A	NP_056060.2	1.1	7.86	7.38	5.82e-13	2.39e-11	1.08	7.86	5.46	7.16e-08	7.87e-07	5.57	2.6e-08	++?+++	4.17e-07	0.00061173	1.57	1.18			6	34837038	35105802	595	32	54162	-0.36	0.6391	+	1	Yes
10300	KATNB1	NP_005877.2	1.1	7.91	7.38	5.83e-13	2.4e-11	1.11	7.91	7.4	5.04e-13	2e-11	-1.87	0.0619905	--?---	0.109688	1	0.69	0.9			16	57749623	57811162	154	26	54162	-0.02	0.50827	+	1
55904	MLL5	NP_891847.1	1.11	8.53	7.37	6.06e-13	2.48e-11	1.11	8.53	6.81	2.47e-11	6.55e-10	4.85	1.23e-06	++?+++	1.01e-05	0.0290166	1.86	1.22	0.6176	0.4968	7	104634637	104774532	169	12	54162	0.08	0.4664	+	1
11215	AKAP11	NP_652761.1	0.93	6.98	-7.37	6.07e-13	2.48e-11	0.94	6.98	-6.33	5.03e-10	9.56e-09	-4.12	3.72e-05	-----+	0.000183511	0.875897	0.74	0.88		-0.458	13	42826261	42917403	204	20	54162	-1.06	0.85655	+	1
196752	LOC196752	NP_001010864.1	1.15	7.99	7.36	6.41e-13	2.62e-11	1.17	7.99	7.41	4.58e-13	1.85e-11
441246	LOC441246	XP_496890.1	0.76	10.51	-7.36	6.61e-13	2.69e-11	0.74	10.51	-7.22	1.64e-12	5.83e-11	-1.55	0.121797	???-+?	0.193576	1	0.95	0.99
5281	PIGF	NP_002634.1	0.91	7.21	-7.35	6.88e-13	2.8e-11	0.9	7.21	-7.67	7.79e-14	3.69e-12	-1.67	0.0940254	-+?---	0.155694	1	0.84	0.94			2	46788413	46864251	171	20	54162	0.01	0.49563	-	1
6650	SOLH	NP_005623.1	1.15	7.76	7.35	6.91e-13	2.81e-11	1.16	7.76	7.1	3.71e-12	1.2e-10	5.14	2.68e-07	++?+++	2.8e-06	0.00631488	1.17	1.08			16	557816	624636	99	18	54162	0.28	0.39092	+	1
10023	FRAT1	NP_005470.2	1.15	7.87	7.35	7.02e-13	2.85e-11	1.11	7.87	4.82	1.85e-06	1.45e-05	3.84	0.000125539	++?+++	0.000524306	1	1.18	1.1			10	99059022	99101672	131	11	54162	-1.1	0.86492	+	1
647340	LOC647340		0.78	9.09	-7.35	7.09e-13	2.87e-11	0.73	9.09	-8.31	7.34e-16	5.63e-14
10938	EHD1	NP_006786.2	1.15	10.91	7.34	7.68e-13	3.1e-11	1.18	10.91	7.74	4.51e-14	2.24e-12	5.24	1.59e-07	++++++	1.81e-06	0.00373184	1.34	1.15	0.5994	0.4906	11	64600206	64667181	105	12	54162	1.46	0.071835	-	1
3385	ICAM3	NP_002153.1	1.18	12.46	7.33	7.79e-13	3.14e-11	1.19	12.46	7	7.33e-12	2.22e-10	-3.33	0.00087636	-+?---	0.00280021	1	0.8	0.93	-0.6088	-0.5568	19	10424452	10470345	129	23	54162	1.61	0.053391	-	1
646849	LOC646849	XP_939063.1	0.9	7.59	-7.33	7.82e-13	3.15e-11	0.91	7.59	-5.49	6.09e-08	6.86e-07
25829	TMEM184B	NP_036396.2	1.12	7.93	7.32	8.41e-13	3.38e-11	1.12	7.93	6.31	5.78e-10	1.08e-08	2.6	0.00939993	++?++-	0.0218752	1	1.22	1.07			22	38592415	38689040	205	25	54162	-0.05	0.51917	-	1
1441	CSF3R	NP_758519.1	1.2	12.9	7.32	8.42e-13	3.38e-11	1.19	12.9	6.3	5.94e-10	1.11e-08	6.14	8.21e-10	?+++++	2.6e-08	1.93e-05	1.41	1.25			1	36911644	36968915	158	22	54162	-0.62	0.73313	-	1
55863	TMEM126B	NP_060950.2	0.86	7.21	-7.32	8.58e-13	3.44e-11	0.81	7.21	-8.59	8.43e-17	8.13e-15	-4.59	4.42e-06	------	2.98e-05	0.10405	0.7	0.88			11	85319617	85367583	87	12	54162	1.19	0.11717	+	1
647037	LOC647037	XP_935122.1	0.94	6.91	-7.32	8.61e-13	3.44e-11	0.93	6.91	-7.44	3.73e-13	1.53e-11
83608	C18orf21	NP_113634.3	0.93	7.33	-7.31	8.95e-13	3.57e-11	0.92	7.33	-7.99	7.45e-15	4.62e-13	-5.86	4.67e-09	--?---	1.04e-07	0.000109977	0.78	0.88	-0.6416	-0.4965	18	33532588	33579250	77	7	54162	0.83	0.20334	+	1
4729	NDUFV2	NP_066552.1	0.9	8.76	-7.3	9.64e-13	3.84e-11	0.91	8.76	-5.85	8.21e-09	1.16e-07	-3.75	0.000177088	-+----	0.000704937	1	0.6	0.86	-0.5986	-0.4977	18	9082628	9154343	141	20	54162	-0.85	0.80206	+	1
55900	ZNF302	NP_060913.2	0.85	7.29	-7.3	9.65e-13	3.84e-11	0.82	7.29	-7.71	5.83e-14	2.82e-12	1.39	0.164137	-+?++-	0.247509	1	1.19	1.02			19	35148553	35197302	174	17	54162	-0.65	0.74158	+	1	Yes
26205	GMEB2	NP_036516.1	1.1	8.38	7.3	9.78e-13	3.88e-11	1.12	8.38	7.35	6.79e-13	2.62e-11	2	0.0457741	+-+++-	0.0848684	1	1.49	1.08			20	62198955	62278381	237	22	54162	0.15	0.44016	-	1
26140	TTLL3	NP_056459.3	1.11	7.97	7.3	9.92e-13	3.93e-11	1.12	7.97	6.82	2.32e-11	6.19e-10	2.52	0.0118789	+-?+++	0.026827	1	1.36	1.1			3	9831632	9898040	150	17	54162	-0.24	0.59451	+	1	Yes
57665	RDH14	NP_065956.1	0.85	7.86	-7.29	1.04e-12	4.11e-11	0.83	7.86	-7.75	4.28e-14	2.14e-12	-0.98	0.326507	??-+--	0.433072	1	0.93	0.96			2	18715989	18761959	99	23	54162	-0.1	0.54069	-	1	Yes
10294	DNAJA2	NP_005871.1	0.87	8.64	-7.29	1.04e-12	4.13e-11	0.83	8.64	-8.22	1.44e-15	1.05e-13	-3.1	0.00190646	------	0.00550889	1	0.51	0.84			16	46969274	47027625	46	7	54162	0.97	0.16535	-	1
1178	CLC	NP_001819.2	0.66	9.66	-7.29	1.08e-12	4.27e-11	0.68	9.66	-6.15	1.45e-09	2.49e-08	-2	0.0456162	?+?---	0.0846022	1	1.05	0.99			19	40201893	40248669	171	15	54162	-0.25	0.60032	-	1
1915	EEF1A1	NP_001393.1	0.86	13.86	-7.28	1.11e-12	4.37e-11	0.85	13.86	-6.65	6.78e-11	1.62e-09	3.89	9.97e-05	++?+++	0.000430241	1	1.27	1.13		0.4742	6	74205473	74250755	86	9	54162	0.22	0.41462	-	1
3308	HSPA4	NP_940833.1	0.89	7.76	-7.28	1.12e-12	4.42e-11	0.89	7.76	-7	7.07e-12	2.15e-10	1.06	0.290707	-++++-	0.395327	1	1.62	1.08			5	132367662	132460709	190	14	54162	1.66	0.048903	+	1
115106	CCDC5	NP_612452.1	0.94	6.82	-7.28	1.15e-12	4.53e-11	0.94	6.82	-6.26	7.52e-10	1.37e-08	2.28	0.0227072	-+?++-	0.0468562	1	0.92	1.01			18	43664298	43728299	184	16	54162	-0.81	0.78981	+	1
652864	LOC652864	XP_947664.1	0.94	7.35	-7.27	1.17e-12	4.6e-11	0.95	7.35	-5.8	1.08e-08	1.47e-07
7443	VRK1	NP_003375.1	0.94	6.9	-7.27	1.19e-12	4.65e-11	0.93	6.9	-7.52	2.18e-13	9.53e-12	-5.66	1.52e-08	--?---	2.69e-07	0.00035695	0.67	0.83	-0.6125	-0.5028	14	97243684	97367951	332	26	54162	-0.16	0.56176	+	1	Yes
23480	SEC61G	NP_055117.1	0.89	9.36	-7.27	1.22e-12	4.78e-11	0.88	9.36	-7.25	1.35e-12	4.86e-11	-4.43	9.55e-06	--?---	5.77e-05	0.224786	0.58	0.83			7	54799940	54846939	208	16	54162	0.79	0.21595	-	1
10600	USP16	NP_006438.1	0.87	7.55	-7.26	1.25e-12	4.86e-11	0.88	7.53	-7.73	5.02e-14	2.47e-12	1.4	0.162838	++?++-	0.245898	1	1.8	1.13		-0.4412	21	30376938	30446809	90	12	54162	-0.41	0.65917	+	1
643031	LOC643031	XP_931495.1	1.3	10.87	7.26	1.29e-12	5.04e-11	1.43	10.87	8.76	2.21e-17	2.56e-15
55759	WDR12	NP_060726.2	0.93	7.03	-7.26	1.3e-12	5.04e-11	0.93	6.89	-8.05	4.85e-15	3.18e-13	-2.36	0.018405	------	0.0391175	1	0.93	0.96			2	203725323	203796949	131	9	54162	2.37	0.0088265	-	1	Yes
10077	TSPAN32	NP_005696.1	1.13	8.25	7.26	1.33e-12	5.14e-11	1.13	8.25	6.32	5.15e-10	9.76e-09	4.13	3.61e-05	-+?++-	0.00017887	0.85017	1.11	1.03			11	2303195	2359430	243	24	54162	-0.53	0.70123	+	1
4034	LRCH4	NP_002310.2	1.18	9.34	7.25	1.37e-12	5.3e-11	1.22	9.34	7.53	2e-13	8.78e-12	5.47	4.39e-08	++?+++	6.39e-07	0.00103261	1.43	1.21	0.637	0.5344	7	100151634	100203806	49	8	54162	1.25	0.10626	-	1
5863	RGL2	NP_004752.1	1.11	7.86	7.25	1.42e-12	5.47e-11	1.1	7.86	6.12	1.75e-09	2.94e-08	4.7	2.63e-06	+++++-	1.91e-05	0.0618981	1.25	1.12	0.6396	0.5524	6	33239431	33287386	89	15	54162	0.37	0.35545	-	1
26054	SENP6	NP_056386.1	0.89	7.45	-7.23	1.53e-12	5.91e-11	0.87	7.45	-7.36	6.67e-13	2.59e-11	0.09	0.924909	-+-+-+	0.948449	1	0.84	0.97			6	76291596	76447997	331	18	54162	0.14	0.44476	+	1
55726	C12orf11	NP_060634.1	0.93	7.08	-7.23	1.54e-12	5.92e-11	0.92	7.08	-7.11	3.41e-12	1.12e-10	1.26	0.207392	++?++-	0.300211	1	1.18	1.04			12	27038112	27111254	168	30	54162	0.63	0.26321	-	1
55856	THEM2	NP_060943.1	0.92	7.17	-7.23	1.54e-12	5.92e-11	0.93	7.17	-5.86	7.96e-09	1.13e-07	-3.59	0.000327241	-+----	0.00119769	1	0.47	0.85			6	24647263	24725297	232	30	54162	0.68	0.24721	+	1
51192	CKLF	NP_001035229.1	0.81	9.77	-7.23	1.54e-12	5.92e-11	0.75	9.77	-9.05	2.31e-18	3.32e-16	4.46	8.09e-06	++?++?	5.01e-05	0.190453	1.16	1.1		0.4743	16	66566466	66623832	119	6	54162	-0.64	0.73925	+	1
29880	ALG5	NP_037470.1	0.91	7.35	-7.23	1.59e-12	6.09e-11	0.89	7.35	-7.64	9.03e-14	4.22e-12	-2.68	0.00731119	--+---	0.0176064	1	0.78	0.93			13	37503907	37593504	127	12	54162	-0.08	0.53285	-	1
6548	SLC9A1	NP_003038.2	1.15	8.65	7.23	1.59e-12	6.1e-11	1.19	8.65	7.73	4.77e-14	2.36e-12	-2.66	0.00789478	--+---	0.0188192	1	0.89	0.97	-0.4897	-0.4578	1	27405300	27501621	108	6	54162	-0.6	0.72636	-	1
3689	ITGB2	NP_000202.1	1.15	13.21	7.23	1.61e-12	6.15e-11	1.15	13.21	6.43	2.69e-10	5.5e-09	6.37	1.88e-10	++?+++	7.9e-09	4.42e-06	1.56	1.28			21	46285864	46368753	304	50	54162	-0.72	0.76545	-	1
56655	POLE4	NP_063949.2	0.85	9.05	-7.22	1.71e-12	6.5e-11	0.83	9.05	-7.63	9.67e-14	4.5e-12	-0.54	0.591846	--++--	0.686591	1	0.64	0.93			2	75165775	75216859	115	12	54162	-0.28	0.61041	+	1
23144	ZC3H3	NP_055932.1	1.12	8.41	7.21	1.77e-12	6.72e-11	1.15	8.41	8.01	6.47e-15	4.05e-13	2.52	0.0118947	+-?++-	0.0268523	1	1.21	1.05			8	144499825	144644449	430	35	54162	-1.29	0.9016	-	1
11104	KATNA1	NP_008975.1	0.92	7.64	-7.21	1.79e-12	6.8e-11	0.93	7.64	-5.88	6.95e-09	1e-07	2.72	0.00649869	-++++-	0.0158954	1	1.11	1.02	0.6307	0.5508	6	149896009	149990154	126	4	54162	-0.7	0.75715	-	1
11017	RY1	NP_006848.1	0.89	7.6	-7.2	1.93e-12	7.3e-11	0.86	7.6	-8.4	3.65e-16	3.02e-14	-0.62	0.53228	---++-	0.634187	1	0.81	0.92			2	70101075	70152368	72	5	54162	-0.72	0.76518	+	1
26133	TRPC4AP	NP_056453.1	1.12	8.99	7.19	2.06e-12	7.77e-11	1.13	8.99	6.86	1.79e-11	4.87e-10	-3.03	0.00242565	--?--+	0.0067939	1	0.94	0.97			20	33570207	33700618	308	13	54162	1.53	0.063155	-	1
57226	LYRM2	NP_065199.1	0.89	7.49	-7.18	2.18e-12	8.24e-11	0.88	7.49	-6.91	1.35e-11	3.78e-10	-0.81	0.417615	+-?--+	0.525902	1	1.42	1.06			6	90321943	90368474	80	15	54162	-1.23	0.89103	-	1
1120	CHKB	NP_005189.2	1.13	8.72	7.18	2.2e-12	8.31e-11	1.15	8.72	7.63	1.02e-13	4.74e-12	5.01	5.45e-07	++?++?	5.09e-06	0.0128256	1.37	1.14			22	50997387	51041428	190	28	54162	-0.28	0.61105	-	1
79074	C2orf49	NP_076998.1	0.95	6.91	-7.18	2.22e-12	8.35e-11	0.93	6.91	-7.94	1.07e-14	6.37e-13	0.63	0.530031	++++--	0.632307	1	1.68	1.09		0.405	2	105933714	105996514	178	23	54162	0.3	0.38355	+	1
4607	MYBPC3	NP_000247.1	1.12	7.34	7.18	2.25e-12	8.44e-11	1.11	7.34	5.86	8.03e-09	1.13e-07	-0.18	0.853834	???-++	0.896907	1	1.04	1.01			11	47332957	47394253	124	18	54162	4.17	1.56e-05	-	0.284372
57456	KIAA1143	NP_065747.1	0.95	6.83	-7.18	2.25e-12	8.45e-11	0.94	6.83	-7.86	1.93e-14	1.08e-12	-2.29	0.0220256	+-?--+	0.0456417	1	1.13	1			3	44770236	44823173	55	9	54162	1.87	0.030487	-	1
4702	NDUFA8	NP_055037.1	0.9	8.56	-7.17	2.3e-12	8.6e-11	0.89	8.56	-7.61	1.16e-13	5.34e-12	-4.45	8.45e-06	------	5.19e-05	0.198921	0.63	0.87	-0.6123	-0.5042	9	124874745	124942098	217	27	54162	-0.15	0.55906	-	1
64431	ACTR6	NP_071941.1	0.86	7.13	-7.17	2.32e-12	8.65e-11	0.84	7.13	-7.38	5.62e-13	2.22e-11	-3.74	0.000180524	-+?---	0.000716751	1	0.67	0.88			12	100573865	100638202	142	20	54162	0.63	0.26451	+	1
23644	EDC4	NP_055144.3	1.11	8.33	7.17	2.34e-12	8.74e-11	1.14	8.33	7.57	1.48e-13	6.63e-12	-0.13	0.893787	+-?-+-	0.926182	1	1.16	1.02			16	67886926	67938417	60	10	54162	-0.66	0.74395	+	1
5791	PTPRE	NP_569119.1	1.13	9.54	7.17	2.38e-12	8.86e-11	1.04	7.08	3.84	0.000134776	0.000669789	-1.76	0.0777252	+-?---	0.132393	1	1.21	0.99			10	129685325	129904180	775	88	54162	-0.04	0.51477	+	1
2098	ESD	NP_001975.1	0.9	9.39	-7.16	2.56e-12	9.52e-11	0.91	9.39	-5.93	5.36e-09	7.96e-08	-0.82	0.413903	-+-+-+	0.522485	1	0.63	0.92			13	47325391	47391423	119	14	54162	-0.25	0.59801	-	1
283870	C16orf79	NP_872369.1	1.06	7.07	7.15	2.63e-12	9.74e-11	1.06	7.07	6.41	3.1e-10	6.23e-09	3.34	0.000851121	-+++++	0.00272957	1	1.11	1.04			16	2239254	2283541	75	8	54162	1.14	0.12776	-	1
54951	COMMD8	NP_060315.1	0.84	7.27	-7.15	2.73e-12	1.01e-10	0.8	7.27	-8.08	3.81e-15	2.56e-13	-3.98	6.97e-05	-+?---	0.000316071	1	0.79	0.9			4	47432815	47485676	122	15	54162	-2	0.97703	-	1
6621	SNAPC4	NP_003077.2	1.1	7.99	7.15	2.78e-12	1.03e-10	1.11	7.99	6.78	2.98e-11	7.71e-10	-2.08	0.0370934	--?--+	0.0710698	1	0.93	0.97			9	139250021	139314655	195	18	54162	-0.2	0.57901	-	1
113802	C1orf59	NP_653185.1	0.87	8.29	-7.14	2.95e-12	1.09e-10	0.86	8.29	-6.91	1.35e-11	3.79e-10	-2.99	0.00279856	---+--	0.00769006	1	0.49	0.84			1	109170910	109224148	65	7	54162	0.6	0.2728	-	1
29109	FHOD1	NP_037373.2	1.09	7.83	7.14	2.97e-12	1.09e-10	1.09	7.83	6.69	5.39e-11	1.32e-09	2.15	0.031425	--?++-	0.0617169	1	1.07	1.01			16	67243292	67301425	50	7	54162	-0.36	0.63932	-	1	Yes
9419	CRIPT	NP_054890.1	0.9	7.56	-7.13	3.01e-12	1.1e-10	0.89	7.56	-6.93	1.14e-11	3.26e-10	3.46	0.000540937	-++++-	0.00184467	1	1.14	1.02	0.5791	0.4824	2	46824325	46872881	124	15	54162	0.15	0.43968	+	1
125893	ZNF816A	NP_001026835.1	0.89	7.16	-7.13	3.09e-12	1.13e-10	0.87	7.16	-7.17	2.33e-12	7.96e-11	0.34	0.732354	???+-?	0.804316	1	1.02	1.01			19	53432632	53486164	185	26	54162	2.71	0.0033369	-	1
55902	ACSS2	NP_061147.1	1.13	8.96	7.12	3.2e-12	1.17e-10	1.14	8.96	6.53	1.47e-10	3.18e-09	3.71	0.000204964	-+?+++	0.000799273	1	1.11	1.05			20	33442766	33535769	131	9	54162	1.31	0.094285	+	1
54529	ASNSD1	NP_061921.1	0.83	7.96	-7.12	3.22e-12	1.18e-10	0.79	7.96	-7.98	8.26e-15	5.05e-13	-0.89	0.371637	-+++--	0.480659	1	0.8	0.95			2	190506125	190555557	72	10	54162	1.06	0.14434	+	1
201294	UNC13D	NP_954712.1	1.11	7.51	7.12	3.26e-12	1.19e-10	1.1	7.51	5.93	5.39e-09	8e-08	2.46	0.0140285	???+++	0.0309624	1	1.16	1.07			17	73803306	73860798	132	15	54162	0.47	0.31869	-	1
54518	APBB1IP	NP_061916.3	1.19	10.66	7.12	3.28e-12	1.19e-10	1.18	10.66	6.09	2.08e-09	3.43e-08	5.09	3.54e-07	++?+++	3.53e-06	0.00832061	1.3	1.16			10	26707253	26876732	496	53	54162	-0.19	0.57655	+	1
3305	HSPA1L	NP_005518.3	1.1	7.84	7.12	3.3e-12	1.2e-10	1.1	7.84	6.65	7.06e-11	1.68e-09	0.71	0.476932	-??++-	0.583459	1	0.9	0.98	0.4664	0.465	6	31757396	31810093	121	29	54162	0.6	0.27361	-	1
119710	C11orf74	NP_620142.2	0.97	6.72	-7.12	3.34e-12	1.21e-10	0.96	6.72	-7.07	4.6e-12	1.45e-10	-3.74	0.000185846	-+----	0.000734212	1	0.56	0.85			11	36596043	36700841	314	11	54162	0.1	0.4596	+	1
51742	ARID4B	NP_057458.4	0.89	8.49	-7.12	3.38e-12	1.22e-10	0.89	8.49	-5.84	8.65e-09	1.21e-07	-0.07	0.944943	-+?-+-	0.962158	1	0.75	0.96			1	235310210	235511532	361	10	54162	-0.05	0.51805	-	1
65008	MRPL1	NP_064621.2	0.93	6.81	-7.11	3.42e-12	1.24e-10	0.93	6.81	-6.75	3.76e-11	9.48e-10	-6.44	1.21e-10	------	5.55e-09	2.84e-06	0.52	0.81	-0.6251	-0.5076	4	78763805	78893944	271	14	54162	0.43	0.33377	+	1
64422	ATG3	NP_071933.2	0.85	8.96	-7.11	3.49e-12	1.26e-10	0.82	8.96	-7.85	2.13e-14	1.17e-12	-0.53	0.596826	-++---	0.690699	1	1.11	1			3	112231354	112300810	190	11	54162	-0.77	0.78072	-	1
23140	ZZEF1	NP_055928.3	1.09	7.95	7.1	3.67e-12	1.32e-10	1.09	7.95	6.16	1.34e-09	2.33e-08	1.83	0.0679906	++?+++	0.118444	1	1.21	1.07			17	3887739	4066314	549	15	54162	0.54	0.29486	-	1
548593	GIYD1	NP_001014999.1	1.1	7.58	7.1	3.78e-12	1.36e-10	1.08	7.01	6.6	9.26e-11	2.13e-09										16	30185164	30228887	17	5	54162	-1.02	0.84596	+	1
29080	CCDC59	NP_054886.1	0.86	8.27	-7.09	3.96e-12	1.42e-10	0.83	8.27	-7.91	1.38e-14	7.99e-13	1.54	0.123714	+-?+++	0.196052	1	1.28	1.06			12	82726083	82772584	105	7	54162	0.41	0.3412	-	1
1497	CTNS	NP_004928.2	1.08	7.81	7.09	4.05e-12	1.45e-10	1.11	7.81	8.64	5.83e-17	5.82e-15	2.97	0.00297345	+-?++-	0.00810627	1	1.1	1.03			17	3519762	3586397	224	26	54162	1.14	0.12721	+	1
6722	SRF	NP_003122.1	1.1	8.91	7.09	4.09e-12	1.46e-10	1.11	8.91	7.06	4.76e-12	1.5e-10	-3.92	8.86e-05	+-?--+	0.000387365	1	0.92	0.96			6	43118920	43169244	91	9	54162	-0.56	0.71192	+	1
80279	CDK5RAP3	NP_788276.1	1.13	9.4	7.08	4.23e-12	1.51e-10	1.18	9.4	8.33	6.35e-16	4.93e-14	3.25	0.00115279	-+++++	0.00354763	1	1.17	1.06		0.4414	17	46027894	46079152	140	16	54162	0.62	0.2668	+	1
26061	HACL1	NP_036392.2	0.91	7.86	-7.08	4.26e-12	1.52e-10	0.9	7.86	-7.01	6.76e-12	2.07e-10	-5.79	7.02e-09	--?---	1.43e-07	0.000165194	0.6	0.79	-0.6298	-0.468	3	15582239	15663359	142	23	54162	0.27	0.39336	-	1
3329	HSPD1	NP_002147.2	0.85	8.89	-7.08	4.31e-12	1.54e-10	0.85	8.89	-6.18	1.21e-09	2.12e-08	1.34	0.180115	-++-+-	0.267119	1	0.68	0.99			2	198331308	198384998	40	5	54162	-0.36	0.64217	-	1	Yes
23398	PPWD1	NP_056157.1	0.9	7.34	-7.08	4.41e-12	1.57e-10	0.88	7.34	-7.29	1.03e-12	3.79e-11	-1.19	0.232358	++---+	0.32942	1	1.36	1.05			5	64839063	64903376	178	12	54162	0.19	0.42271	+	1	Yes
63915	MUTED	NP_958437.1	0.92	7.27	-7.07	4.49e-12	1.6e-10	0.9	7.27	-7.54	1.82e-13	8.03e-12	4.45	8.67e-06	??+++?	5.3e-05	0.203911	1.13	1.08	0.6385	0.5473	6	7993800	8084647	355	21	54162	-0.8	0.78885	-	1
896	CCND3	NP_001751.1	1.13	11.82	7.07	4.58e-12	1.62e-10	1.11	11.82	5.43	8.46e-08	9.15e-07	1.36	0.173764	+++-++	0.259466	1	1.19	1.05			6	41882671	42036610	399	53	54162	-0.05	0.51922	-	1
121260	SLC15A4	NP_663623.1	1.17	9.48	7.07	4.63e-12	1.64e-10	1.15	9.48	5.6	3.32e-08	4e-07	2.12	0.0337959	+++++-	0.0656987	1	1.38	1.08			12	129257739	129328541	268	20	54162	-0.8	0.78675	-	1
9600	PITPNM1	NP_004901.1	1.13	9.33	7.07	4.69e-12	1.66e-10	1.17	9.33	7.86	2.01e-14	1.12e-12	2.22	0.0262132	+++++-	0.0529167	1	1.14	1.05			11	67239231	67292843	41	8	54162	2.29	0.011136	-	1
11193	WBP4	NP_009118.1	0.91	7.12	-7.06	4.78e-12	1.68e-10	0.87	7.12	-8.68	4.38e-17	4.62e-15	-5.21	1.87e-07	-+----	2.08e-06	0.00440905	0.65	0.84			13	41614973	41678142	57	12	54162	-0.46	0.67735	+	1
334	APLP2	NP_001633.1	1.14	8.3	7.06	4.95e-12	1.74e-10	1.15	8.3	6.62	8.55e-11	1.99e-09	-0.71	0.476043	---++-	0.582642	1	0.58	0.89			11	129919716	130034706	264	12	54162	0.08	0.46873	+	1	Yes
57567	ZNF319	NP_065858.1	1.09	8.26	7.06	4.97e-12	1.74e-10	1.09	8.26	6.61	9.12e-11	2.11e-09	1.42	0.155671	++?++-	0.237073	1	1.19	1.04			16	58008572	58054551	88	12	54162	0.62	0.26716	-	1
9552	SPAG7	NP_004881.2	0.92	7.41	-7.06	5.05e-12	1.76e-10	0.93	7.41	-5.26	2.02e-07	2e-06	-6.23	4.69e-10	--?---	1.64e-08	1.1e-05	0.7	0.88	-0.6022	-0.5254	17	4842521	4891132	97	15	54162	2.49	0.0063256	-	1
5965	RECQL	NP_116559.1	0.9	7.45	-7.05	5.29e-12	1.85e-10	0.89	7.45	-7.43	4.15e-13	1.68e-11	3.05	0.00227344	++?++-	0.00642879	1	1.62	1.16			12	21601844	21674603	315	21	54162	-0.82	0.79263	-	1
440055	LOC440055	XP_495885.1	0.84	10.54	-7.05	5.32e-12	1.85e-10	0.91	10.54	-3.44	0.000631816	0.00259853	2.53	0.0114825	???++?	0.0260293	1	1.1	1.07
27249	C2orf25	NP_056517.1	0.88	8.74	-7.05	5.38e-12	1.87e-10	0.85	8.74	-8.15	2.34e-15	1.64e-13	-2.54	0.0112033	-+----	0.0254789	1	0.71	0.91			2	150406147	150464330	135	13	54162	-0.31	0.62129	-	1
6667	SP1	NP_612482.2	1.12	8.57	7.04	5.42e-12	1.88e-10	1.08	8.57	4.17	3.53e-05	0.000201158	4.81	1.53e-06	++++++	1.21e-05	0.0361001	1.32	1.15		0.4419	12	53753979	53830230	121	9	54162	2.92	0.0017481	+	1
51319	RSRC1	NP_057709.2	0.94	6.91	-7.04	5.44e-12	1.89e-10	0.94	6.91	-6.54	1.36e-10	2.97e-09	0.85	0.393807	-+?++-	0.502631	1	0.65	0.94			3	157803690	158282624	1340	20	54162	-1.21	0.88776	+	1
6189	RPS3A	NP_000997.1	0.65	9.29	-7.04	5.49e-12	1.9e-10	0.59	9.21	-6.77	3.22e-11	8.25e-10	-0.44	0.659712	???-+?	0.744651	1	0.97	1			4	152000725	152045804	63	7	54162	0.21	0.41851	+	1
91860	CALML4	NP_001026903.2	0.89	7.55	-7.04	5.5e-12	1.9e-10	0.87	7.55	-7.32	8.37e-13	3.17e-11	5.44	5.42e-08	-+?+++	7.64e-07	0.00127479	1.36	1.09	0.6949	0.5769	15	68463043	68518448	69	5	54162	2.55	0.0053462	-	1	Yes
440737	LOC440737	XP_496446.1	0.79	8.89	-7.04	5.52e-12	1.91e-10	0.76	8.89	-7.31	9.21e-13	3.46e-11	-2.44	0.0145145	???-+?	0.0318796	1	0.94	0.97
8764	TNFRSF14	NP_003811.2	1.11	10.94	7.04	5.55e-12	1.91e-10	1.1	10.94	5.32	1.53e-07	1.56e-06	2.15	0.0315753	++++++	0.0619862	1	1.25	1.07			1	2467291	2515268	81	6	54162	-1.47	0.92952	+	1
5393	EXOSC9	NP_001029366.1	0.94	7.42	-7.04	5.57e-12	1.92e-10	0.94	7.42	-5.62	2.93e-08	3.59e-07	-6.85	7.45e-12	------	6.02e-10	1.75e-07	0.74	0.86		-0.4402	4	122702445	122758176	111	14	54162	-1.51	0.93474	+	1
728492	LOC728492	XP_001130874.1	0.91	7.3	-7.04	5.74e-12	1.97e-10	0.91	7.3	-5.93	5.28e-09	7.86e-08									-0.4576
10576	CCT2	NP_006422.1	0.86	7.94	-7.04	5.77e-12	1.98e-10	0.85	7.94	-6.82	2.39e-11	6.35e-10	-3.48	0.00049697	--?---	0.00171487	1	0.76	0.88			12	69959206	70030595	205	25	54162	1.11	0.13421	+	1	Yes
728417	LOC728417	XP_001130364.1	1.17	7.79	7.03	5.78e-12	1.98e-10	1.17	7.79	6.04	2.77e-09	4.43e-08
401466	C8orf59	NP_001093142.1	0.86	7.47	-7.03	5.84e-12	2e-10	0.83	7.47	-7.61	1.18e-13	5.39e-12	-2.19	0.0282531	++?---	0.0563517	1	0.76	0.96			8	86106288	86152643	46	6	54162	0.91	0.18205	-	1
85444	LRRCC1	NP_208325.3	0.94	6.91	-7.03	5.84e-12	2e-10	0.94	6.91	-5.92	5.6e-09	8.25e-08	-1.11	0.265383	++?---	0.367105	1	0.89	0.99			8	85999323	86078315	95	9	54162	-0.04	0.51567	+	1
201895	C4orf34	NP_777581.1	0.89	8.86	-7.03	5.95e-12	2.03e-10	0.87	8.86	-7.32	8.62e-13	3.26e-11	-3.32	0.000912477	-++---	0.00289986	1	0.63	0.93	-0.4742	-0.4205	4	39528917	39660481	301	30	54162	1.13	0.12908	-	1	Yes
4335	MNT	NP_064706.1	1.12	8.5	7.02	6.21e-12	2.11e-10	1.15	8.5	7.56	1.67e-13	7.44e-12	1.84	0.0658294	--?+++	0.115362	1	1.14	1.02			17	2267354	2324258	138	23	54162	0.12	0.45211	-	1
128346	C1orf162	NP_777556.1	1.14	11.57	7.02	6.33e-12	2.15e-10	1.1	11.57	4.54	6.87e-06	4.7e-05	7.41	1.28e-13	-+++++	2.82e-11	3.01e-09	1.76	1.27	0.6913	0.5251	1	111996474	112041134	104	21	54162	-0.36	0.63891	+	1	Yes
8673	VAMP8	NP_003752.2	0.83	9.62	-7.01	6.97e-12	2.36e-10	0.87	9.62	-4.44	1.06e-05	6.89e-05	7.15	8.4e-13	++++++	1.15e-10	1.98e-08	1.69	1.31	0.6045	0.4687	2	85784614	85829156	121	17	54162	-1.16	0.87759	+	1
29927	SEC61A1	NP_037468.1	1.12	9.45	7	7.11e-12	2.4e-10	1.14	9.45	7.17	2.34e-12	7.97e-11	5.63	1.83e-08	+-?++-	3.15e-07	0.000429597	1.3	1.09	0.6297	0.5131	3	127750402	127810526	142	5	54162	-0.35	0.63664	+	1
5937	RBMS1	NP_002888.1	1.11	9.55	7	7.15e-12	2.41e-10	1.1	9.55	5.88	6.97e-09	1e-07	3.8	0.000144771	-+?+++	0.000592636	1	0.64	0.99			2	161108662	161370366	557	29	54162	1.33	0.091494	-	1
84240	ZCCHC9	NP_115656.1	0.92	7.71	-7	7.36e-12	2.48e-10	0.89	7.71	-9.14	1.08e-18	1.67e-16	-1.33	0.181938	-+----	0.269517	1	0.83	0.94			5	80577402	80628966	113	14	54162	0.93	0.17497	+	1
85441	PRIC285	NP_208384.2	1.2	9.32	7	7.39e-12	2.49e-10	1.17	9.32	5.48	6.39e-08	7.17e-07	3.98	6.99e-05	???+++	0.00031697	1	1.37	1.18			20	62169439	62225592	129	22	54162	-0.07	0.5276	-	1
55743	CHFR	NP_060693.1	1.09	9.41	7	7.41e-12	2.49e-10	1.08	9.41	5.28	1.84e-07	1.84e-06	-2	0.0456869	-----+	0.0847248	1	0.94	0.98	-0.492	0.4511	12	133396937	133501459	366	20	54162	-1.12	0.86962	-	1
9556	C14orf2	NP_004885.1	0.88	7.46	-6.99	7.57e-12	2.54e-10	0.85	7.46	-7.84	2.25e-14	1.23e-12	-5.32	1.04e-07	------	1.28e-06	0.00244097	0.6	0.83	-0.6305	-0.5212	14	104358625	104407903	192	18	54162	-0.68	0.75271	-	1
728653	LOC728653	XP_001127710.1	1.12	8.02	6.99	7.72e-12	2.59e-10	1.13	8.02	7.02	6.38e-12	1.97e-10
6235	RPS29	NP_001023.1	0.79	12.7	-6.99	7.74e-12	2.59e-10	0.77	12.7	-6.79	2.79e-11	7.27e-10	-0.12	0.907161	-+?-+-	0.935837	1	0.87	0.98			14	50023390	50073134	80	6	54162	-1.65	0.95045	-	1	Yes
126014	OSCAR	NP_570127.2	1.18	8.8	6.99	7.83e-12	2.62e-10	1.16	8.8	5.5	5.69e-08	6.45e-07	3.69	0.000226897	?+?+++	0.000874366	1	1.07	1.05			19	54577933	54624159	112	20	54162	-0.09	0.53465	-	1
84950	PRPF38A	NP_116253.2	0.94	7.36	-6.99	7.87e-12	2.63e-10	0.94	7.36	-6.62	8.13e-11	1.9e-09	-1.01	0.312226	-+?-++	0.418294	1	0.85	0.98		0.4437	1	52850219	52903992	40	7	54162	1.33	0.092319	+	1
54961	SSH3	NP_060327.2	1.1	7.61	6.99	8.02e-12	2.67e-10	1.09	7.61	5.59	3.63e-08	4.32e-07	3.76	0.000171496	++?+++	0.000685578	1	1.31	1.11		0.4512	11	67050919	67100078	61	10	54162	0.16	0.43521	+	1
80325	ABTB1	NP_115937.1	1.17	10.09	6.97	8.63e-12	2.87e-10	1.14	10.09	5.1	4.54e-07	4.14e-06	0.5	0.618805	-+++-+	0.709679	1	0.91	1			3	127371781	127419769	89	17	54162	0.07	0.47147	+	1
64976	MRPL40	NP_003767.2	0.96	6.76	-6.97	9.03e-12	2.99e-10	0.95	6.76	-7.31	8.95e-13	3.38e-11	-3.72	0.000200589	------	0.000783769	1	0.89	0.94			22	19399302	19443600	74	11	54162	1.9	0.028418	+	1
1454	CSNK1E	NP_689407.1	0.95	6.82	-6.95	1.01e-11	3.35e-10	1.09	8.25	5.61	3.25e-08	3.93e-07	3.35	0.000801949	+-?++?	0.00259308	1	1.69	1.17	0.5772	0.4563	22	38666697	38734089	107	26	54162	-0.32	0.62433	-	1
646766	LOC646766		0.78	9.84	-6.95	1.02e-11	3.38e-10	0.74	9.84	-7.24	1.46e-12	5.22e-11
401357	LOC401357	NP_001013707.1	1.26	9.85	6.95	1.04e-11	3.42e-10	1.27	9.85	6.44	2.59e-10	5.33e-09	-0.13	0.897796	?????-	0.928945	1	0.99	0.99
1990	ELA1	NP_001962.3	0.95	6.76	-6.95	1.04e-11	3.42e-10	0.94	6.76	-6.89	1.49e-11	4.14e-10	3.77	0.000161361	???+++	0.000650364	1	1.12	1.1			12	51702227	51760463	135	12	54162	1.26	0.10421	-	1	Yes
6093	ROCK1	NP_005397.1	0.92	6.86	-6.94	1.05e-11	3.46e-10	0.91	6.86	-7.54	1.89e-13	8.35e-12	4.56	5.22e-06	++?++-	3.43e-05	0.122847	1.54	1.14			18	18509701	18711812	101	6	54162	1.03	0.15156	-	1
1164	CKS2	NP_001818.1	0.95	6.86	-6.94	1.06e-11	3.49e-10	0.93	6.86	-8.03	5.61e-15	3.63e-13	0.66	0.507589	-+-++-	0.611895	1	1.2	0.99		0.4206	9	91906113	91951618	91	18	54162	0.27	0.39249	+	1
51643	TMBIM4	NP_057140.2	0.86	10.82	-6.94	1.09e-11	3.58e-10	0.8	10.82	-9.01	3.16e-18	4.38e-16	-0.46	0.647167	++?--+	0.733765	1	1.28	1.04		0.4635	12	66510717	66583808	160	13	54162	0.72	0.23662	-	1
7873	ARMET	NP_006001.2	0.89	8.63	-6.94	1.11e-11	3.63e-10	0.9	8.63	-5.76	1.38e-08	1.83e-07	0.86	0.389555	-+?+++	0.498591	1	0.6	0.94			3	51402692	51446828	49	6	54162	0.74	0.2306	+	1
1186	CLCN7	NP_001278.1	1.16	9.74	6.93	1.12e-11	3.66e-10	1.19	9.74	7.3	9.5e-13	3.55e-11	5.09	3.55e-07	+++++-	3.54e-06	0.00835176	1.36	1.13	0.6168	0.4961	16	1474934	1545085	388	37	54162	-1.47	0.92867	-	1
158345	LOC158345		0.81	9.41	-6.93	1.15e-11	3.75e-10	0.81	9.41	-6.22	9.41e-10	1.68e-08	-0.91	0.362982	???-+?	0.471495	1	0.96	1
2629	GBA	NP_001005742.1	1.14	8.59	6.93	1.16e-11	3.77e-10	1.15	8.59	6.83	2.2e-11	5.89e-10	-3.47	0.000517932	?-----	0.00177808	1	0.88	0.93			1	155184239	155234653	59	5	54162	-1.16	0.87687	-	1	Yes
11224	RPL35	NP_009140.1	0.78	10.38	-6.92	1.21e-11	3.92e-10	0.75	10.38	-7.42	4.45e-13	1.8e-11	1.01	0.312721	++?-++	0.418657	1	1.29	1.07			9	127600158	127644240	74	8	54162	-0.38	0.6463	-	1	Yes
29964	PRICKLE4	NP_037529.3	0.88	8.58	-6.92	1.22e-11	3.95e-10	0.87	8.58	-6.48	1.99e-10	4.17e-09	-2.66	0.00788284	???--?	0.0188022	1	0.98	0.98			6	41728500	41775110	91	17	54162	-0.14	0.55611	+	1
84259	DCUN1D5	NP_115675.1	0.92	7	-6.92	1.26e-11	4.08e-10	0.88	7.16	-7.28	1.12e-12	4.1e-11	-5.97	2.43e-09	------	6.26e-08	5.72e-05	0.67	0.86			11	102901413	102982944	109	19	54162	-0.69	0.75614	-	1
114926	C8orf40	NP_612445.1	0.91	7.56	-6.91	1.29e-11	4.19e-10	0.88	7.56	-7.82	2.68e-14	1.45e-12	-4.27	1.98e-05	------	0.000106892	0.466369	0.8	0.91	-0.5092	0.5471	8	42376298	42428140	117	8	54162	2.89	0.0019327	+	1
2205	FCER1A	NP_001992.1	0.73	8.39	-6.91	1.34e-11	4.33e-10	0.7	8.39	-6.9	1.44e-11	4e-10	3.14	0.00169205	++?+++	0.00494769	1	1.39	1.11			1	159233678	159298014	159	21	54162	-0.32	0.62373	+	1
51690	LSM7	NP_057283.1	0.88	8.19	-6.9	1.36e-11	4.37e-10	0.88	8.19	-5.9	6.25e-09	9.12e-08	-0.56	0.574738	--+-+-	0.67218	1	0.77	0.97			19	2301520	2348614	159	23	54162	-0.86	0.8049	-	1
392	ARHGAP1	NP_004299.1	1.13	9.49	6.9	1.38e-11	4.45e-10	1.18	9.49	8.17	2.07e-15	1.47e-13	0.57	0.568894	+-+-++	0.667103	1	1.33	1.06			11	46678625	46742215	61	9	54162	1.45	0.074155	-	1
1051	CEBPB	NP_005185.2	1.18	12.04	6.9	1.41e-11	4.55e-10	1.1	12.04	3.43	0.000648283	0.00265856	7.84	4.44e-15	++++++	2.18e-12	1.04e-10	2.09	1.38	0.6617	0.4968	20	48787120	48829227	52	8	54162	-1.03	0.8485	+	1
8725	C19orf2	NP_604431.1	0.84	8.74	-6.89	1.47e-11	4.72e-10	0.92	7.18	-6.65	6.75e-11	1.61e-09	1.21	0.22474	-++++-	0.320862	1	0.84	1			19	30394551	30527519	209	14	54162	-1.46	0.92815	+	1	Yes
9541	CIR	NP_004873.3	0.91	7.55	-6.89	1.48e-11	4.76e-10	0.92	7.55	-5.25	2.12e-07	2.09e-06	-2.92	0.0034891	-+?---	0.00932938	1	0.88	0.94			2	175192878	175280443	163	16	54162	0.56	0.28869	-	1
10598	AHSA1	NP_036243.1	0.93	7.85	-6.88	1.58e-11	5.06e-10	0.96	7.85	-3.48	0.000536659	0.00225526	2.04	0.0409824	-++++-	0.0773122	1	1.28	1.05	0.4671	0.4482	14	77904373	77955815	148	17	54162	-0.17	0.56876	+	1	Yes
2319	FLOT2	NP_004466.2	1.16	12.01	6.88	1.58e-11	5.07e-10	1.17	12.01	6.22	9.73e-10	1.73e-08	0.56	0.576339	--?++-	0.673584	1	0.81	0.95			17	27186356	27244715	69	14	54162	-0.39	0.65143	-	1
55573	CDV3	NP_060018.1	0.87	8.54	-6.88	1.62e-11	5.18e-10	0.85	8.54	-6.96	9.56e-12	2.81e-10	4.64	3.48e-06	++?+++	2.43e-05	0.0819982	1.21	1.08			3	133272434	133329118	131	18	54162	-1.19	0.88278	+	1
80017	C14orf159	NP_079228.3	1.13	9.71	6.88	1.64e-11	5.22e-10	1.14	9.71	6.57	1.12e-10	2.5e-09	0.76	0.44699	++?-++	0.554963	1	1.31	1.09			14	91506677	91711976	413	48	54162	0.13	0.44982	+	1
5716	PSMD10	NP_002805.1	0.88	7.74	-6.88	1.64e-11	5.22e-10	0.86	7.74	-7.45	3.56e-13	1.48e-11	-5.94	2.88e-09	--?---	7.09e-08	6.78e-05	0.58	0.82
6404	SELPLG	NP_002997.1	1.16	8.6	6.87	1.64e-11	5.23e-10	1.15	8.6	5.51	5.49e-08	6.26e-07	5.97	2.35e-09	++?++-	6.1e-08	5.54e-05	1.29	1.18			12	108995671	109047735	99	22	54162	-1.1	0.86475	-	1
647361	LOC647361	XP_941523.1	0.74	11.29	-6.87	1.7e-11	5.4e-10	0.73	11.29	-6.59	1.01e-10	2.3e-09
5110	PCMT1	NP_005380.1	0.84	9.01	-6.87	1.73e-11	5.48e-10	0.81	9.01	-7.44	3.81e-13	1.56e-11	-5.33	9.78e-08	------	1.22e-06	0.00230061	0.36	0.72	-0.6223	-0.4811	6	150050831	150152557	179	3	54162	-0.68	0.75106	+	1
7862	BRPF1	NP_004625.2	1.11	9.61	6.86	1.8e-11	5.69e-10	1.14	9.61	7.51	2.27e-13	9.86e-12	2.57	0.010105	+-?++-	0.0232972	1	1.4	1.08			3	9753413	9809699	88	23	54162	-0.18	0.56987	+	1
51380	CSAD	NP_057073.3	1.15	8.22	6.86	1.83e-11	5.78e-10	0.97	6.85	-3.74	0.00020315	0.000968345	-3.08	0.00204907	+++--+	0.00586552	1	1.35	1.09			12	53531447	53595422	106	10	54162	2.54	0.0055287	-	1
78994	PRR14	NP_076936.1	1.12	9.64	6.85	1.91e-11	6.01e-10	1.12	9.64	6.15	1.48e-09	2.52e-08	5.68	1.36e-08	++++++	2.47e-07	0.000319519	1.27	1.12	0.5943	0.4804	16	30642038	30687734	28	6	54162	1.44	0.074456	+	1
89849	ATG16L2	NP_203746.1	1.16	8.37	6.85	1.94e-11	6.08e-10	1.18	8.37	6.63	7.91e-11	1.85e-09	3.77	0.000160874	++?+++	0.000648736	1	1.16	1.09			11	72505451	72573793	83	13	54162	-0.7	0.75926	+	1
8509	NDST2	NP_003626.1	1.09	7.92	6.85	1.97e-11	6.17e-10	1.1	7.92	6.88	1.57e-11	4.33e-10	-1.21	0.225077	+-+--+	0.32113	1	1.23	1.03			10	75541669	75591589	38	5	54162	1.54	0.061892	-	1
286053	NSMCE2	NP_775956.1	0.95	6.82	-6.85	1.97e-11	6.17e-10	0.94	6.82	-6.49	1.91e-10	4.02e-09	-3	0.00267821	------	0.00739825	1	0.69	0.91			8	126084083	126399367	683	46	54162	-0.15	0.5593	+	1
57654	KIAA1530	NP_065945.1	1.12	7.89	6.84	2.04e-11	6.37e-10	1.11	7.89	5.57	3.93e-08	4.66e-07	-0.65	0.515697	++?--?	0.619416	1	1.42	1.1			4	1321043	1401837	235	19	54162	-0.36	0.63989	+	1
50807	DDEF1	NP_060952.2	1.17	9.85	6.84	2.05e-11	6.41e-10	1.15	9.85	5.39	1.04e-07	1.11e-06	-3.35	0.000817543	--?---	0.0026359	1	0.75	0.91			8	131044350	131475906	1218	37	54162	-1.12	0.86929	-	1
131076	CCDC58	NP_001017928.1	0.94	6.8	-6.84	2.07e-11	6.45e-10	0.94	6.8	-6.16	1.4e-09	2.41e-08	-0.47	0.635855	++?--+	0.724256	1	1.08	1.01			3	122058436	122122074	159	20	54162	-0.53	0.70074	-	1
90850	ZNF598	NP_835461.1	1.09	8.18	6.84	2.11e-11	6.56e-10	1.11	8.18	7.52	2.21e-13	9.65e-12	2.11	0.0351297	-+?+++	0.0678989	1	0.92	1			16	2027653	2079822	171	17	54162	0.77	0.21924	-	1
3001	GZMA	NP_006135.1	0.72	9.36	-6.83	2.19e-11	6.79e-10	0.71	9.36	-6.49	1.87e-10	3.94e-09	1.3	0.192273	???+--	0.281951	1	1.05	1.01			5	54378474	54426080	69	9	54162	0.1	0.4594	+	1	Yes
55108	BSDC1	NP_060515.2	1.09	8.93	6.83	2.19e-11	6.79e-10	1.12	8.93	7.81	2.84e-14	1.52e-12	2.11	0.0346066	++?-++	0.067031	1	1.41	1.1			1	32810704	32880062	15	7	54162	-0.14	0.5553	-	1
81609	SNX27	NP_112180.4	1.14	9.58	6.83	2.27e-11	7.01e-10	1.1	9.58	4.31	1.94e-05	0.000118309	0.31	0.756917	++?-+-	0.823215	1	1.12	1.03		0.4336	1	151564454	151691559	137	13	54162	1.67	0.047565	+	1
115209	OMA1	NP_660286.1	0.91	7.56	-6.82	2.29e-11	7.07e-10	0.89	7.56	-7.22	1.74e-12	6.13e-11	0.86	0.388321	++?-+-	0.497398	1	1.41	1.11			1	58861052	59032469	655	41	54162	-0.98	0.83643	-	1
4722	NDUFS3	NP_004542.1	0.9	8.73	-6.82	2.4e-11	7.38e-10	0.9	8.73	-6.21	1e-09	1.78e-08	-5	5.63e-07	------	5.22e-06	0.0132445	0.58	0.86	-0.6712	-0.5347	11	47580562	47626115	41	9	54162	4.94	3.96e-07	+	0.00721868		Yes
6916	TBXAS1	NP_001052.1	1.14	9.85	6.82	2.4e-11	7.38e-10	1.14	9.85	5.92	5.59e-09	8.25e-08	6.75	1.52e-11	?+?+++	1.07e-09	3.58e-07	1.54	1.27		0.4579	7	139458047	139740125	570	73	54162	0.57	0.28388	+	1	Yes
10844	TUBGCP2	NP_006650.1	1.09	8.05	6.82	2.4e-11	7.38e-10	1.13	8.05	8.52	1.4e-16	1.29e-14	-1.45	0.147772	--?+-+	0.226933	1	0.83	0.95			10	135072134	135145841	114	7	54162	2.08	0.01899	-	1
9946	CRYZL1	NP_665857.2	0.93	7.39	-6.81	2.56e-11	7.84e-10	0.93	7.39	-6.56	1.23e-10	2.7e-09	-4.72	2.4e-06	-+?---	1.78e-05	0.0564426	0.68	0.9	0.6785	0.5521	21	34941647	35034160	92	17	54162	0.21	0.41542	-	1
10808	HSPH1	NP_006635.2	0.87	7.85	-6.8	2.59e-11	7.94e-10	0.87	7.85	-5.73	1.61e-08	2.1e-07	1.03	0.300985	++--+-	0.406198	1	2.15	1.16			13	31690762	31757246	160	18	54162	-0.01	0.50391	-	1	Yes
10347	ABCA7	NP_061985.2	1.17	8.12	6.8	2.61e-11	7.97e-10	1.19	8.12	6.56	1.21e-10	2.68e-09	5.32	1.05e-07	++?+++	1.3e-06	0.00247253	1.29	1.13			19	1020102	1085571	234	37	54162	6.11	4.92e-10	+	8.97e-06		Yes
220869	CBWD5	NP_001020087.2	0.93	7.05	-6.8	2.63e-11	8.01e-10	0.92	7.05	-7.35	6.75e-13	2.61e-11
6016	RIT1	NP_008843.1	0.92	7.18	-6.8	2.63e-11	8.01e-10	0.9	7.18	-8.3	7.72e-16	5.85e-14	3.93	8.67e-05	++?++-	0.00038012	1	1.77	1.2	0.4928	0.4623	1	155847599	155901193	57	5	54162	-1.37	0.91492	-	1
51634	RBMX2	NP_057108.2	0.93	7.16	-6.8	2.66e-11	8.11e-10	0.92	7.16	-6.8	2.6e-11	6.84e-10	-2.28	0.022573	+-?---	0.0466202	1	1.19	1
84319	C3orf26	NP_115735.1	0.94	7.09	-6.8	2.71e-11	8.24e-10	0.94	7.09	-5.93	5.26e-09	7.84e-08	-6.27	3.56e-10	------	1.32e-08	8.39e-06	0.56	0.78	-0.6547	-0.5483	3	99516678	99917476	463	24	54162	-0.14	0.55758	+	1	Yes
646434	LOC646434	XP_938707.1	1.13	7.44	6.8	2.74e-11	8.31e-10	1.16	7.44	6.91	1.32e-11	3.72e-10
5293	PIK3CD	NP_005017.2	1.15	9.46	6.8	2.75e-11	8.34e-10	1.19	9.46	7.66	7.88e-14	3.72e-12	3.18	0.00147899	--+++-	0.00440013	1	0.67	0.97	0.635	0.4991	1	9691789	9809172	181	28	54162	-0.2	0.57765	+	1
29922	NME7	NP_037462.1	0.95	6.85	-6.79	2.81e-11	8.51e-10	0.95	6.85	-6.41	3.15e-10	6.32e-09	-2.56	0.0104069	-++---	0.0239089	1	0.68	0.9			1	169081258	169357186	939	25	54162	-1.13	0.87173	-	1
51186	WBP5	NP_001006613.1	0.96	6.76	-6.78	2.97e-11	8.95e-10	0.98	6.76	-2.91	0.00372501	0.0122124	5.72	1.06e-08	++?++-	2.03e-07	0.000249927	1.24	1.12		0.4948
28985	MCTS1	NP_054779.1	0.94	6.88	-6.78	3.07e-11	9.26e-10	0.93	6.88	-6.33	5.13e-10	9.74e-09	-5.33	9.65e-08	------	1.21e-06	0.00226994	0.46	0.77	-0.6217	-0.4926
3727	JUND	NP_005345.3	1.13	12.5	6.78	3.12e-11	9.38e-10	1.15	12.5	6.87	1.69e-11	4.62e-10	3.43	0.00061091	++?++-	0.0020506	1	1.45	1.14			19	18370563	18412432	157	19	54162	-0.84	0.79854	-	1
79089	TMUB2	NP_001070142.1	1.09	8.06	6.77	3.15e-11	9.48e-10	1.09	8.06	6.09	2.12e-09	3.5e-08	-2.44	0.0145102	--?--+	0.0318732	1	0.85	0.94			17	42244300	42289099	68	9	54162	0.95	0.17025	+	1
170954	KIAA1949	NP_597728.1	1.12	10.98	6.77	3.27e-11	9.82e-10	1.12	10.98	5.74	1.53e-08	2e-07	5.82	5.76e-09	?+?+++	1.22e-07	0.000135434	1.46	1.21	0.6628	0.5069	6	30624166	30675672	196	25	54162	1.43	0.075968	-	1
27436	EML4	NP_061936.2	0.87	8.53	-6.77	3.31e-11	9.93e-10	0.87	8.53	-6.07	2.32e-09	3.79e-08	2.54	0.0112302	--+++-	0.025531	1	0.89	1			2	42376490	42579688	505	18	54162	2.6	0.0046377	+	1	Yes
56647	BCCIP	NP_057651.1	0.94	7.14	-6.76	3.38e-11	1.01e-09	0.94	7.14	-5.77	1.34e-08	1.78e-07	-5.71	1.11e-08	------	2.11e-07	0.000261116	0.56	0.82	-0.5908	-0.4929	10	127492102	127562264	81	8	54162	-0.67	0.74968	+	1	Yes
6625	SNRP70	NP_003080.2	1.14	10.2	6.76	3.39e-11	1.01e-09	1.15	10.2	6.79	2.78e-11	7.24e-10	3.27	0.00108711	+-?+++	0.00337327	1	1.19	1.08			19	49568465	49631870	153	24	54162	1.03	0.15259	+	1
127253	TYW3	NP_612476.1	0.94	6.93	-6.76	3.45e-11	1.03e-09	0.94	6.93	-6.19	1.14e-09	2.01e-08	1.23	0.21871	--+++-	0.313738	1	0.77	0.94			1	75178836	75252361	246	20	54162	1.56	0.059818	+	1
64926	FLJ21438	NP_075055.1	1.16	10.16	6.76	3.45e-11	1.03e-09	1.2	10.16	7.41	4.65e-13	1.87e-11	5.91	3.49e-09	?+?+++	8.18e-08	8.22e-05	1.3	1.13		0.4625	19	15542435	15595382	68	12	54162	-0.55	0.70728	-	1
27141	CIDEB	NP_055245.2	1.1	7.95	6.76	3.48e-11	1.04e-09	1.07	7.95	4.47	9.57e-06	6.28e-05	0.63	0.530216	?-?++-	0.632496	1	1.04	1.01			14	24754393	24800576	118	15	54162	0.17	0.43358	-	1
4704	NDUFA9	NP_004993.1	0.92	7.93	-6.76	3.51e-11	1.04e-09	0.93	7.93	-5.29	1.74e-07	1.76e-06	-6.58	4.86e-11	------	2.68e-09	1.14e-06	0.63	0.82	-0.6673	-0.502	12	4738264	4816720	257	25	54162	0.74	0.23092	+	1
7411	VBP1	NP_003363.1	0.82	7.95	-6.75	3.72e-11	1.11e-09	0.77	7.95	-7.9	1.51e-14	8.68e-13	-6.08	1.24e-09	--?---	3.64e-08	2.91e-05	0.63	0.85	-0.6207	-0.5105
10287	RGS19	NP_005864.1	1.11	8.63	6.75	3.78e-11	1.12e-09	1.04	8.63	2.18	0.0293667	0.0717952	5.52	3.48e-08	-+?+++	5.31e-07	0.000818704	1.2	1.1			20	62684534	62731356	74	13	54162	-0.3	0.61739	-	1
83707	TRPT1	NP_113660.1	1.09	8.41	6.74	3.86e-11	1.14e-09	1.08	8.41	5.71	1.86e-08	2.38e-07	0.01	0.991514	-+?+-+	0.994269	1	0.92	0.99			11	63971271	64013726	64	12	54162	0.75	0.22596	-	1
1857	DVL3	NP_004414.3	1.08	7.55	6.74	3.93e-11	1.16e-09	1.09	7.55	6.84	2.12e-11	5.68e-10	-1.45	0.145947	+++---	0.224673	1	1.32	1.05			3	183853099	183911314	104	14	54162	0.57	0.2836	+	1
56889	TM9SF3	NP_064508.2	0.92	7.35	-6.74	3.98e-11	1.17e-09	0.91	7.35	-6.99	7.69e-12	2.32e-10	2.48	0.0131098	--+++-	0.0291867	1	0.82	0.98			10	98257867	98366809	230	18	54162	0.2	0.42159	-	1
23162	MAPK8IP3	NP_001035529.1	1.1	8.7	6.74	4e-11	1.18e-09	1.12	8.7	6.81	2.52e-11	6.64e-10	0.37	0.708603	+-?+--	0.785678	1	0.9	1			16	1736184	1840318	181	20	54162	-1.04	0.85003	+	1
2961	GTF2E2	NP_002086.1	0.9	8.69	-6.74	4.02e-11	1.18e-09	0.9	8.69	-6.33	5.12e-10	9.72e-09	1.77	0.0773928	-+?++-	0.131903	1	0.61	0.92			8	30416031	30535738	228	23	54162	-0.46	0.67596	-	1
84274	COQ5	NP_115690.3	0.88	7.91	-6.73	4.09e-11	1.2e-09	0.87	7.91	-6.59	1.02e-10	2.32e-09	-0.54	0.587231	-+?-+-	0.682618	1	0.79	0.95			12	120921082	120986964	185	17	54162	1.42	0.078503	-	1
23031	MAST3	NP_055831.1	1.17	9.46	6.72	4.33e-11	1.27e-09	1.19	9.46	6.64	7.45e-11	1.76e-09	-5.47	4.41e-08	+-?--+	6.41e-07	0.00103882	0.77	0.89	-0.6504	-0.5743	19	18188585	18282502	264	22	54162	-2.27	0.98825	+	1
80162	ATHL1	NP_079368.2	1.26	9.11	6.72	4.36e-11	1.28e-09	1.32	9.11	7.19	2.01e-12	6.97e-11	4.94	7.8e-07	++?+++	6.82e-06	0.0183526	1.28	1.15			11	268480	317511	104	23	54162	-1.08	0.8597	+	1
10109	ARPC2	NP_005722.1	0.91	12	-6.72	4.58e-11	1.34e-09	0.89	12	-7.71	5.6e-14	2.73e-12	-2.85	0.00438117	-++---	0.0113372	1	0.84	0.95		-0.4738	2	219061817	219139071	119	9	54162	-0.41	0.66036	+	1
57325	CSRP2BP	NP_065397.1	0.94	7.01	-6.71	4.64e-11	1.35e-09	0.93	7.01	-6.59	9.78e-11	2.24e-09	-1.06	0.288569	---+--	0.39301	1	0.67	0.89			20	18102868	18189031	285	31	54162	-1.47	0.92889	+	1
643284	LOC643284	XP_933273.1	0.74	10.3	-6.71	4.78e-11	1.39e-09	0.7	10.3	-6.95	9.95e-12	2.88e-10
85450	KIAA1754	NP_203755.1	1.15	9.45	6.71	4.84e-11	1.41e-09	1.12	9.45	4.7	3.23e-06	2.4e-05	2.31	0.0207607	?+?+++	0.043426	1	1.14	1.07			10	106049454	106118251	115	14	54162	-0.05	0.51929	-	1	Yes
837	CASP4	NP_001216.1	0.85	9.51	-6.7	5.01e-11	1.45e-09	0.84	9.51	-6.16	1.36e-09	2.36e-08	7.01	2.32e-12	++?+++	2.43e-10	5.46e-08	1.56	1.25	0.63	0.485	11	104793594	104859325	176	16	54162	-2.16	0.98445	-	1
5959	RDH5	NP_002896.2	1.08	7.27	6.7	5.02e-11	1.46e-09	1.08	7.27	6.3	6.09e-10	1.13e-08	3.5	0.000463604	++?+++	0.00161394	1	1.46	1.14		0.4457	12	56094151	56138526	43	9	54162	0.22	0.41143	+	1
51816	CECR1	NP_803124.1	1.19	11.02	6.69	5.33e-11	1.54e-09	1.25	11.02	7.4	4.83e-13	1.93e-11	1.97	0.0493174	+-+??+	0.0902785	1	1.49	1.17			22	17639681	17722744	324	46	54162	-1.57	0.94137	-	1
50856	CLEC4A	NP_919429.2	0.86	8.31	-6.69	5.35e-11	1.55e-09	0.81	8.31	-8.24	1.23e-15	9.09e-14	2.08	0.0373056	++?++-	0.0714124	1	1.16	1.07
6777	STAT5B	NP_036580.2	1.12	8.81	6.69	5.35e-11	1.55e-09	1.1	8.81	4.93	1.06e-06	8.79e-06	3.99	6.6e-05	-+?+++	0.000301332	1	1.12	1.03	0.6172	0.5114	17	40331195	40448478	80	8	54162	-0.04	0.51732	-	1
23299	BICD2	NP_001003800.1	1.12	9.06	6.69	5.42e-11	1.57e-09	1.08	9.06	3.76	0.000187018	0.000899172	0.68	0.49945	++?+--	0.604307	1	1.67	1.11			9	95453645	95547083	203	15	54162	0.69	0.24356	-	1
51649	MRPS23	NP_057154.2	0.94	6.99	-6.68	5.64e-11	1.63e-09	0.93	6.99	-6.84	2.11e-11	5.66e-10	-5.6	2.14e-08	------	3.57e-07	0.00050379	0.53	0.81	-0.6066	-0.4583	17	55896287	55947433	133	20	54162	1.47	0.070295	-	1
285282	RABL3	NP_776186.2	0.95	6.86	-6.68	5.7e-11	1.64e-09	0.95	6.86	-6.52	1.53e-10	3.29e-09	-7.18	6.92e-13	--?---	9.99e-11	1.63e-08	0.76	0.87		-0.4484	3	120385528	120481384	212	29	54162	-0.31	0.62068	-	1
92799	SHKBP1	NP_612401.1	1.19	8.61	6.68	5.71e-11	1.64e-09	1.21	8.61	6.45	2.43e-10	5.02e-09	2.34	0.019507	???+++	0.0411622	1	1.06	1.04			19	41062757	41117305	114	19	54162	3.04	0.0011911	+	1
122769	PPIL5	NP_982292.1	0.93	7.25	-6.68	5.85e-11	1.68e-09	0.93	7.25	-6.57	1.13e-10	2.52e-09	5.39	6.98e-08	-+?++-	9.31e-07	0.00164229	1.16	1.06	0.6001	0.4876	14	50045383	50101390	128	9	54162	-1.9	0.97106	+	1
54971	BANP	NP_524576.2	1.11	8.61	6.67	5.91e-11	1.7e-09	1.14	8.61	7.3	1e-12	3.7e-11	4.88	1.04e-06	++?+++	8.74e-06	0.0243932	1.25	1.12		-0.4744	16	87964231	88130924	634	20	54162	1.05	0.1471	+	1
706	TSPO	NP_000705.2	1.12	12.29	6.67	6.11e-11	1.75e-09	1.09	12.29	4.22	2.82e-05	0.000164409	6.5	8.02e-11	++?+++	4.03e-09	1.89e-06	1.28	1.18	0.6746	0.5419	22	43527520	43579248	162	27	54162	-1.26	0.89606	+	1	Yes
10494	STK25	NP_006365.2	1.07	8.01	6.67	6.16e-11	1.76e-09	1.07	8.01	5.76	1.37e-08	1.82e-07	-3.61	0.000303851	-----+	0.00112522	1	0.91	0.95		-0.4441	2	242414122	242469145	142	23	54162	-2.21	0.98656	-	1
57591	MKL1	NP_065882.1	1.11	7.94	6.67	6.2e-11	1.77e-09	1.14	7.94	7.65	9e-14	4.21e-12	1.97	0.0493948	--?+++	0.090392	1	0.84	0.98			22	40786292	41052690	387	17	54162	-0.3	0.61886	-	1
29926	GMPPA	NP_995319.1	1.12	8.06	6.66	6.3e-11	1.8e-09	1.16	8.06	7.93	1.19e-14	7.06e-13	1.3	0.192547	+-?+++	0.282267	1	1.03	1.01			2	220343587	220391718	75	7	54162	0.14	0.44624	+	1
64801	ARV1	NP_073623.1	0.93	7.02	-6.66	6.31e-11	1.8e-09	0.91	7.02	-7.43	3.99e-13	1.62e-11	-5.32	1.06e-07	------	1.31e-06	0.00249716	0.82	0.87	-0.61	-0.4685	1	231094823	231156479	200	19	54162	-0.64	0.74016	+	1
1523	CUTL1	NP_853530.1	1.13	8.29	6.64	7.16e-11	2.04e-09	1.1	8.29	4.5	8.13e-06	5.45e-05	3.17	0.00154142	++?+++	0.00456223	1	2.06	1.2	-0.5742	-0.4977	7	101439184	101947250	1133	61	54162	2.69	0.0035491	+	1
11033	CENTA1	NP_006860.1	1.13	10.24	6.64	7.3e-11	2.07e-09	1.14	10.24	6.33	5.01e-10	9.54e-09	0.53	0.5968	+-+++?	0.690699	1	1.2	1.03			7	917537	1015208	181	38	54162	0.79	0.2146	-	1
79585	CORO7	NP_078811.2	1.14	8.68	6.64	7.45e-11	2.11e-09	1.18	8.68	7.43	4.03e-13	1.64e-11	-3.23	0.00124806	--?--?	0.00380103	1	0.71	0.89			16	4384543	4486962	181	17	54162	-0.71	0.75966	-	1
10666	CD226	NP_006557.1	0.92	6.98	-6.63	8.03e-11	2.27e-09	0.92	6.98	-6.06	2.5e-09	4.05e-08	-0.38	0.706624	?+?-+-	0.784212	1	0.91	0.98			18	67510192	67644412	297	28	54162	-0.31	0.62217	-	1
27068	PPA2	NP_789842.2	0.89	7.51	-6.63	8.08e-11	2.28e-09	0.85	7.51	-8.12	2.98e-15	2.03e-13	-1.39	0.164705	-+?---	0.248192	1	0.61	0.93			4	106270234	106415227	490	25	54162	1	0.15899	-	1
23247	KIAA0556	NP_056017.1	1.09	7.69	6.62	8.28e-11	2.33e-09	1.05	7.69	3.68	0.000258362	0.00118965	1.91	0.0563488	++?+++	0.101236	1	1.17	1.06			16	27541441	27811692	317	22	54162	-0.04	0.51413	+	1
55677	IWS1	NP_060439.1	0.93	7.64	-6.62	8.35e-11	2.35e-09	0.94	7.64	-5.57	3.99e-08	4.72e-07	0.07	0.941731	+++---	0.959926	1	1.22	1.04			2	128218383	128304462	195	18	54162	-0.53	0.70123	-	1
10276	NET1	NP_001040625.1	0.93	7.04	-6.62	8.47e-11	2.38e-09	0.94	7.04	-5.12	4.2e-07	3.84e-06	-2.05	0.0401331	+-?---	0.0760087	1	1.72	1.04			10	5434514	5521019	200	12	54162	-0.58	0.71862	+	1	Yes
641710	LOC641710	XP_935741.1	1.18	7.97	6.62	8.53e-11	2.4e-09	1.21	7.97	6.56	1.23e-10	2.7e-09
240	ALOX5	XP_001127464.1	1.18	11.63	6.61	8.8e-11	2.47e-09	1.12	11.63	4.01	7e-05	0.000373341	5.32	1.02e-07	++?+++	1.27e-06	0.00240361	1.51	1.29			10	45849624	45961569	292	24	54162	-0.12	0.54822	+	1
8540	AGPS	NP_003650.1	0.94	7.12	-6.61	8.81e-11	2.47e-09	0.93	7.12	-6.41	3.01e-10	6.08e-09	-3.19	0.00143245	------	0.00428486	1	0.56	0.83			2	178237471	178428564	364	15	54162	0.82	0.20524	+	1
9147	SDCCAG1	NP_004704.2	0.93	7.71	-6.61	9.04e-11	2.53e-09	0.97	7.71	-2.32	0.0209141	0.0539226	4.37	1.24e-05	++?++-	7.15e-05	0.291382	1.95	1.2			14	50230528	50339763	59	5	54162	0.34	0.36826	-	1
54505	DHX29	NP_061903.2	0.92	7.61	-6.61	9.05e-11	2.53e-09	0.91	7.61	-6.93	1.18e-11	3.34e-10	-0.97	0.333545	-+?---	0.440654	1	0.71	0.94			5	54532073	54623521	156	14	54162	0.13	0.44958	-	1
9512	PMPCB	NP_004270.2	0.91	8.27	-6.6	9.25e-11	2.58e-09	0.89	8.27	-7.47	2.98e-13	1.25e-11	-3.1	0.00196568	-+?---	0.00565847	1	0.78	0.9			7	102917873	102990349	82	12	54162	-0.27	0.60655	+	1
55840	EAF2	NP_060926.2	0.95	6.77	-6.6	9.26e-11	2.58e-09	0.95	6.77	-6.29	6.34e-10	1.18e-08	-1.57	0.116875	-+?---	0.187093	1	0.9	0.96			3	121534030	121625373	241	18	54162	-1.08	0.8604	+	1
51602	NOP5/NOP58	NP_057018.1	0.89	7.44	-6.6	9.28e-11	2.58e-09	0.87	7.44	-7.17	2.34e-12	7.97e-11	-0.07	0.945625	++--+-	0.962674	1	1.14	1.02			2	203110515	203188384	129	11	54162	1.54	0.062029	+	1	Yes
4245	MGAT1	NP_002397.1	1.11	9.93	6.6	9.64e-11	2.68e-09	1.14	9.93	7.14	2.89e-12	9.55e-11	6.75	1.48e-11	++++++	1.04e-09	3.48e-07	1.45	1.16	0.635	0.5381	5	180197541	180257939	156	11	54162	1.29	0.098642	-	1
160760	PPTC7	NP_644812.1	1.11	8.77	6.6	9.71e-11	2.69e-09	1.11	8.77	5.97	4.18e-09	6.41e-08	2.66	0.00787803	-+?++-	0.0187945	1	0.82	1			12	110952237	111041064	94	13	54162	0.26	0.39865	-	1
653598	LOC653598	XP_933431.1	0.93	7	-6.59	9.92e-11	2.75e-09	0.95	7	-4	7.08e-05	0.00037721
4650	MYO9B	NP_004136.2	1.13	8.45	6.59	1.03e-10	2.85e-09	1.16	8.45	7.08	4.27e-12	1.35e-10	4.85	1.21e-06	-+++++	9.98e-06	0.028526	1.34	1.13		0.4631	19	17166591	17344104	617	56	54162	1.63	0.051083	+	1
10476	ATP5H	NP_001003785.1	0.89	9.91	-6.59	1.04e-10	2.86e-09	0.88	9.91	-6.53	1.46e-10	3.16e-09	-4.38	1.21e-05	--?---	7e-05	0.283869	0.74	0.87	-0.6656	-0.536	17	73014955	73063074	140	19	54162	3.59	0.0001639	-	1
27346	TMEM97	NP_055388.2	0.92	7.35	-6.58	1.07e-10	2.95e-09	0.9	7.35	-7.35	6.83e-13	2.64e-11	-1.26	0.2072	--?+-+	0.300007	1	0.66	0.89			17	26626121	26675711	54	10	54162	-1.41	0.92145	+	1	Yes
3895	KTN1	NP_004977.2	0.88	7.26	-6.58	1.1e-10	3.03e-09	0.86	7.26	-7.01	6.64e-12	2.04e-10	7.4	1.35e-13	++?+++	2.91e-11	3.17e-09	3.33	1.53	0.7064	0.6059	14	56026925	56171302	367	11	54162	0.56	0.28672	+	1
10507	SEMA4D	NP_006369.2	1.12	10.78	6.57	1.12e-10	3.06e-09	1.15	10.78	7.05	5.19e-12	1.62e-10	0.28	0.775679	+++--+	0.838142	1	1.44	1.08			9	91955706	92132906	549	47	54162	1.12	0.13083	-	1
90933	TRIM41	NP_963921.1	1.08	8.11	6.57	1.14e-10	3.12e-09	1.1	8.11	6.65	7.13e-11	1.69e-09	-0.76	0.446411	++?-+-	0.554538	1	1.14	1.01			5	180630263	180682808	152	23	54162	0.27	0.39321	+	1
29	ABR	NP_001083.2	1.12	9.31	6.57	1.15e-10	3.15e-09	1.12	9.31	5.77	1.31e-08	1.75e-07	-3.91	9.28e-05	------	0.000403358	1	0.87	0.92			17	886758	1110616	631	79	54162	-0.01	0.50498	-	1	Yes
375690	FAM39E	NP_878908.2	1.15	10.5	6.57	1.17e-10	3.21e-09	1.19	10.5	7.33	7.81e-13	2.97e-11
112398	EGLN2	NP_444274.1	1.09	8.46	6.56	1.2e-10	3.27e-09	1.08	11.02	4.92	1.13e-06	9.3e-06	4.22	2.47e-05	??+++?	0.000128724	0.580289	1.14	1.1			19	41285048	41334346	137	22	54162	-1.44	0.9252	+	1
126432	FLJ45909	NP_940847.1	1.1	8	6.56	1.2e-10	3.27e-09	1.1	8	5.42	8.69e-08	9.36e-07	1.09	0.274388	???+-+	0.37746	1	1.03	1.01			19	39338470	39388919	76	13	54162	2.4	0.0082524	-	1
1936	EEF1D	NP_115754.2	0.9	8.32	-6.56	1.21e-10	3.3e-09	0.92	7.61	-4.38	1.44e-05	9.05e-05	5.55	2.86e-08	++?+++	4.52e-07	0.000672409	1.7	1.24	0.6645	0.5617	8	144641867	144699845	216	25	54162	0.16	0.43563	-	1
1106	CHD2	NP_001036037.1	0.94	7.15	-6.56	1.22e-10	3.32e-09	0.95	7.15	-4.96	9.34e-07	7.84e-06	1.14	0.254554	?????+	0.35469	1	1.04	1.04			15	93422286	93591237	441	41	54162	0.67	0.25184	+	1
2108	ETFA	NP_000117.1	0.89	8.58	-6.56	1.23e-10	3.33e-09	0.87	8.58	-7.31	9e-13	3.39e-11	-2.02	0.0436687	-+?---	0.0816078	1	0.88	0.95			15	76488628	76623810	262	14	54162	-0.28	0.611	-	1
64786	TBC1D15	NP_073608.2	0.89	7.57	-6.55	1.29e-10	3.49e-09	0.87	7.57	-7.05	5.2e-12	1.63e-10	0.85	0.394029	+++-++	0.502794	1	1.13	1.04			12	72213487	72340629	229	18	54162	-0.76	0.77632	+	1
7155	TOP2B	NP_001059.2	0.89	9.1	-6.55	1.3e-10	3.51e-09	0.89	9.1	-5.51	5.35e-08	6.11e-07	-5.29	1.23e-07	-+----	1.47e-06	0.00288524	0.76	0.89	-0.5597	-0.5109	3	25619396	25726396	212	18	54162	-0.01	0.50264	-	1	Yes
9267	PSCD1	NP_059430.2	1.08	8.77	6.55	1.3e-10	3.51e-09	1.07	8.77	5.35	1.27e-07	1.32e-06	2.36	0.0183081	+++-++	0.0389308	1	1.25	1.1			17	76650130	76798376	295	17	54162	1.55	0.060842	-	1
10295	BCKDK	NP_005872.1	1.13	9.18	6.55	1.32e-10	3.55e-09	1.14	9.18	6.31	5.64e-10	1.06e-08	-4.97	6.6e-07	------	5.93e-06	0.0155293	0.85	0.91	-0.484	-0.4741	16	31099615	31144112	51	5	54162	2.63	0.0042876	+	1
55147	RBM23	NP_001070820.1	1.12	9.84	6.55	1.33e-10	3.57e-09	1.1	9.84	5.08	5.17e-07	4.65e-06	0.78	0.435273	--?+--	0.543884	1	0.76	0.94			14	23349854	23408396	121	12	54162	-0.14	0.5568	-	1
988	CDC5L	NP_001244.1	0.93	7.16	-6.54	1.34e-10	3.61e-09	0.92	7.16	-6.29	6.44e-10	1.19e-08	-4.1	4.17e-05	--+---	0.000202748	0.980893	0.71	0.9	0.466		6	44335251	44438161	194	29	54162	0.03	0.48726	+	1
149428	BNIPL	NP_612122.2	1.05	6.97	6.54	1.35e-10	3.62e-09	1.05	6.97	5.83	9.34e-09	1.29e-07	4.22	2.39e-05	???++-	0.000125465	0.56334	1.31	1.11	0.5822	0.5289	1	150989029	151040076	99	22	54162	0.75	0.2257	+	1
55629	PNRC2	NP_060231.1	0.82	8.51	-6.54	1.39e-10	3.71e-09	0.77	8.51	-7.65	8.63e-14	4.05e-12	1.84	0.0651753	??-++-	0.114395	1	0.92	1.01		0.527
51691	LSM8	NP_057284.1	0.96	6.74	-6.53	1.42e-10	3.8e-09	0.96	6.74	-6.4	3.17e-10	6.35e-09	1.58	0.113092	-+?++-	0.181916	1	0.71	0.96			7	117804086	117864093	228	10	54162	-0.39	0.65252	+	1
222229	LRWD1	NP_690852.1	1.11	7.86	6.53	1.45e-10	3.87e-09	1.1	7.86	5.55	4.49e-08	5.22e-07	0.33	0.741589	??++-?	0.811156	1	1.04	1.01			7	102085335	102133615	107	14	54162	-0.69	0.75466	+	1
54931	RG9MTD1	NP_060289.2	0.94	6.87	-6.53	1.48e-10	3.94e-09	0.95	6.87	-5.38	1.07e-07	1.14e-06	-4.99	6.13e-07	--?---	5.58e-06	0.0144303	0.53	0.8		-0.4426	3	101260680	101305290	117	15	54162	2.04	0.020533	+	1
23524	SRRM2	NP_057417.2	1.15	10.03	6.53	1.48e-10	3.94e-09	1.19	10.03	7.39	5.45e-13	2.16e-11	5.33	1.01e-07	++++++	1.25e-06	0.00236758	3.27	1.32	0.5897	0.4908	16	2782330	2841413	53	7	54162	-0.31	0.6202	+	1
7337	UBE3A	NP_000453.2	0.9	7.53	-6.53	1.5e-10	3.98e-09	0.87	7.53	-7.77	3.78e-14	1.92e-12	-3.26	0.00110582	+-?---	0.00342187	1	4.06	1.25			15	25562394	25704190	263	15	54162	-0.3	0.61868	-	1
29924	EPN1	NP_037465.2	1.13	10.4	6.53	1.51e-10	4e-09	1.19	10.4	8.6	7.9e-17	7.72e-15	1.36	0.17351	--++++	0.259153	1	0.89	0.98			19	56166561	56227141	147	17	54162	-1.68	0.95315	+	1
196883	ADCY4	NP_640340.2	1.09	7.18	6.52	1.55e-10	4.1e-09	1.09	7.18	5.84	8.72e-09	1.22e-07	2.23	0.0256845	??+++-	0.0520234	1	1.14	1.06			14	24767555	24824277	161	21	54162	0.29	0.38601	-	1
26505	CNNM3	NP_060093.3	1.13	8.22	6.52	1.57e-10	4.16e-09	1.21	8.22	8.65	5.42e-17	5.47e-15	3.39	0.000702999	++?++-	0.00231804	1	1.39	1.11	0.621	0.5022	2	97460950	97521121	51	5	54162	1.79	0.036731	+	1
7705	ZNF146	NP_009076.1	0.89	7.29	-6.52	1.6e-10	4.23e-09	0.89	7.29	-6.12	1.76e-09	2.94e-08	3.11	0.00187234	-+?+++	0.00542298	1	0.83	1.03	0.6305	0.4765	19	36685504	36749676	149	11	54162	-1.93	0.97332	+	1	Yes
51013	EXOSC1	XP_001131367.1	0.92	7.58	-6.51	1.64e-10	4.32e-09	0.91	8.54	-6.19	1.13e-09	1.99e-08	-3.97	7.29e-05	+-?---	0.000328005	1	1.86	1.05			10	99175666	99225808	76	16	54162	0.27	0.39172	-	1
55357	TBC1D2	NP_060891.2	1.09	7.61	6.51	1.68e-10	4.43e-09	1.07	7.61	4.27	2.29e-05	0.000137024	1.55	0.122114	++?-++	0.194026	1	1.26	1.08			9	100941280	101038003	449	35	54162	2.27	0.011704	-	1	Yes
5252	PHF1	NP_077084.1	1.08	7.68	6.51	1.68e-10	4.43e-09	1.1	7.68	7.21	1.84e-12	6.43e-11	2.9	0.0037167	++-+++	0.00984178	1	1.16	1.07		0.4749	6	33358773	33404230	79	15	54162	-1.73	0.9586	+	1
6059	ABCE1	NP_001035809.1	0.89	7.27	-6.51	1.69e-10	4.43e-09	0.88	7.27	-6.8	2.68e-11	7.02e-10	-5.46	4.88e-08	------	6.98e-07	0.00114744	0.76	0.86		-0.4141	4	145999156	146070676	53	12	54162	2.36	0.0090204	+	1	Yes
57117	INTS12	NP_065128.2	0.94	7.9	-6.5	1.76e-10	4.62e-09	0.95	7.9	-5.42	8.75e-08	9.43e-07	2.59	0.00958519	-++++-	0.0222469	1	1.13	1.01		0.4025	4	106583784	106649881	122	9	54162	0.28	0.39144	-	1
51002	TPRKB	NP_057142.1	0.94	6.98	-6.5	1.8e-10	4.72e-09	0.92	6.98	-7.09	3.98e-12	1.27e-10	-2.78	0.0053683	-++---	0.0135184	1	0.76	0.94			2	73935744	73984765	74	3	54162	-0.57	0.71458	-	1
83940	TATDN1	NP_114415.1	0.94	6.97	-6.5	1.81e-10	4.73e-09	0.94	6.97	-6.1	1.96e-09	3.25e-08	-4.98	6.23e-07	--?---	5.65e-06	0.0146541	0.51	0.82			8	125480735	125571329	168	20	54162	1.78	0.037905	-	1
3683	ITGAL	NP_002200.1	1.15	9.19	6.5	1.81e-10	4.73e-09	1.23	9.19	8.74	2.66e-17	3.01e-15	3.43	0.000610751	?+?+++	0.00205036	1	1.2	1.09			16	30463983	30554506	123	23	54162	0.6	0.27307	+	1	Yes
79651	RHBDF2	NP_078875.3	1.13	8.63	6.5	1.82e-10	4.75e-09	1.14	8.63	6.16	1.42e-09	2.44e-08	7.69	1.44e-14	++?+++	5.39e-12	3.4e-10	1.85	1.36	0.7058	0.5338	17	74446975	74517509	201	32	54162	-1.07	0.85811	-	1
81576	CCDC130	NP_110445.1	1.12	9.74	6.49	1.83e-10	4.77e-09	1.12	9.74	5.87	7.28e-09	1.04e-07	0.19	0.852011	+++-++	0.895512	1	1.16	1.05			19	13822574	13894108	151	16	54162	-1.26	0.89576	+	1
5447	POR	NP_000932.3	1.1	7.67	6.49	1.85e-10	4.81e-09	1.12	7.67	6.81	2.53e-11	6.68e-10	1.34	0.179897	--?+++	0.266846	1	0.9	0.98			7	75524420	75636173	168	31	54162	0.47	0.32052	+	1
57455	REXO1	NP_065746.3	1.08	7.5	6.49	1.85e-10	4.81e-09	1.11	7.5	8.03	5.76e-15	3.71e-13	2.56	0.0105517	???+++	0.0241825	1	1.08	1.05			19	1795245	1868520	143	14	54162	1.12	0.13228	-	1
51307	FAM53C	NP_057689.1	1.16	9.57	6.49	1.85e-10	4.81e-09	1.12	9.57	4.39	1.34e-05	8.49e-05	1.85	0.0649493	+++-+-	0.114092	1	1.2	1.06			5	137653224	137705418	93	13	54162	1.11	0.13306	+	1
27128	PSCD4	NP_037517.1	1.13	10.96	6.49	1.85e-10	4.82e-09	1.16	10.96	7.06	4.77e-12	1.5e-10	4.56	5.2e-06	-+?+++	3.42e-05	0.122375	1.27	1.11			22	37658495	37731389	196	36	54162	0.79	0.21411	+	1
653103	LOC653103	XP_931129.1	1.07	7.7	6.49	1.92e-10	4.96e-09	1.08	7.7	6.15	1.48e-09	2.53e-08
5295	PIK3R1	NP_852664.1	0.91	8.14	-6.49	1.92e-10	4.97e-09	0.9	8.14	-6.15	1.49e-09	2.53e-08	-1.84	0.0662709	+-----	0.115989	1	1.17	0.99			5	67491584	67617649	293	44	54162	0.22	0.41124	+	1
7913	DEK	NP_003463.1	0.83	7.86	-6.49	1.93e-10	4.99e-09	0.78	7.86	-7.5	2.51e-13	1.08e-11	5.17	2.32e-07	++++++	2.47e-06	0.00545646	1.23	1.14		0.5181	6	18204400	18284799	173	23	54162	0.84	0.19938	-	1
84128	WDR75	NP_115544.1	0.9	7.74	-6.48	2.01e-10	5.18e-09	0.88	7.74	-6.91	1.29e-11	3.65e-10	-4.01	5.96e-05	-+----	0.000276793	1	0.89	0.94			2	190286159	190360287	246	11	54162	-0.42	0.66261	+	1	Yes
57129	MRPL47	NP_817125.1	0.96	6.77	-6.48	2.03e-10	5.23e-09	0.95	6.77	-6.33	5.08e-10	9.66e-09	-3.69	0.000220913	-+----	0.000853684	1	0.49	0.85			3	179286253	179342434	74	5	54162	-1.17	0.87916	-	1
81	ACTN4	NP_004915.2	1.14	8.51	6.47	2.07e-10	5.33e-09	1.19	8.51	7.8	3.05e-14	1.62e-12	3.58	0.00035011	++++++	0.00127108	1	1.23	1.09		0.4606	19	39118256	39241336	319	17	54162	1.04	0.14919	+	1	Yes
64005	MYO1G	NP_149043.1	1.14	9.95	6.47	2.09e-10	5.38e-09	1.19	9.95	7.4	4.92e-13	1.96e-11	1.38	0.167021	-+?+++	0.251071	1	0.92	1.01			7	44982260	45038704	113	18	54162	1.12	0.13117	-	1
7439	BEST1	NP_004174.1	1.15	8.16	6.47	2.13e-10	5.48e-09	1.1	8.16	4.03	6.47e-05	0.000347447	1.3	0.194335	-+?-++	0.28446	1	1.28	1.07			11	61697356	61751935	131	27	54162	1.12	0.13134	+	1
10188	TNK2	NP_005772.3	1.11	9.31	6.47	2.15e-10	5.52e-09	1.14	9.31	7.35	6.85e-13	2.64e-11	2.06	0.039448	+-?+++	0.0748678	1	1.41	1.08			3	195570235	195655880	217	36	54162	0.58	0.28216	-	1
388969	LOC388969	NP_001013671.1	1.11	8.17	6.46	2.25e-10	5.76e-09	1.12	8.17	6.07	2.38e-09	3.89e-08	1.03	0.30426	++?-++	0.409802	1	1.31	1.08			2	85812376	85859179	73	14	54162	-0.54	0.70674	-	1
57763	ANKRA2	NP_075526.1	1.11	8.21	6.46	2.31e-10	5.91e-09	1.08	8.21	4.37	1.48e-05	9.26e-05	-2.86	0.00426288	-+?---	0.0110761	1	0.76	0.92		-0.4812	5	72828025	72881521	134	14	54162	-2.66	0.99611	-	1
23355	VPS8	NP_056118.2	1.1	8.46	6.46	2.32e-10	5.93e-09	1.1	8.46	5.81	1.05e-08	1.44e-07	-2.91	0.00360453	???---	0.00958899	1	0.94	0.97			3	184509925	184790402	508	21	54162	-0.77	0.77803	+	1
6813	STXBP2	NP_008880.1	1.17	10.15	6.46	2.32e-10	5.94e-09	1.23	10.15	7.59	1.32e-13	6.01e-12	4.6	4.31e-06	?+?+++	2.92e-05	0.101494	1.11	1.08			19	7681987	7732760	105	8	54162	-1.23	0.88997	+	1
4690	NCK1	NP_006144.1	0.89	7.96	-6.45	2.37e-10	6.06e-09	0.85	7.96	-8	6.95e-15	4.33e-13	2	0.0453679	-+++--	0.0842082	1	0.8	0.99		0.4496	3	136561050	136690446	254	9	54162	1.51	0.065206	+	1
5162	PDHB	NP_000916.1	0.9	9.49	-6.45	2.38e-10	6.07e-09	0.91	9.49	-5.42	8.79e-08	9.46e-07	-6.11	9.9e-10	------	3.01e-08	2.33e-05	0.61	0.82	-0.627	-0.4863	3	58393357	58439579	184	15	54162	-1.3	0.90249	-	1
3066	HDAC2	NP_001518.2	0.89	8.01	-6.45	2.42e-10	6.16e-09	0.86	8.01	-7.01	6.89e-12	2.11e-10	-2.49	0.0128455	++?---	0.0286845	1	0.87	0.99			6	114237320	114312359	164	23	54162	1.6	0.05511	-	1	Yes
50852	TRAT1	NP_057472.2	0.87	7.24	-6.45	2.44e-10	6.22e-09	0.85	7.24	-6.68	5.74e-11	1.39e-09	3.3	0.00097527	???+++	0.00306793	1	1.14	1.11			3	108521631	108593714	193	30	54162	-0.14	0.55495	+	1	Yes
9704	DHX34	NP_055496.2	1.13	8.07	6.44	2.51e-10	6.37e-09	1.14	8.07	6.17	1.27e-09	2.21e-08	3.74	0.000183125	?+?+++	0.00072553	1	1.31	1.11			19	47832538	47905961	235	20	54162	0.95	0.17093	+	1
4738	NEDD8	NP_006147.1	0.93	7.88	-6.44	2.56e-10	6.49e-09	0.93	7.88	-5.27	1.96e-07	1.96e-06	-3.31	0.000930521	-----?	0.00294646	1	0.85	0.92	-0.687	-0.5821	14	24666057	24721576	84	14	54162	0.66	0.25618	-	1
3176	HNMT	NP_001019245.1	0.9	7.2	-6.44	2.56e-10	6.49e-09	0.87	7.2	-7.55	1.75e-13	7.75e-12	1.52	0.127508	++?+--	0.201198	1	1.24	1.04			2	138701808	138793934	160	14	54162	1.22	0.11045	+	1	Yes
2872	MKNK2	NP_060042.2	1.14	10.7	6.44	2.56e-10	6.49e-09	1.16	10.7	6.35	4.46e-10	8.6e-09	5.89	3.77e-09	++++++	8.63e-08	8.86e-05	2.65	1.55	0.4703	0.5081	19	2017470	2071243	127	23	54162	-0.96	0.83022	-	1
7571	ZNF23	NP_666016.1	0.93	6.97	-6.43	2.71e-10	6.85e-09	0.93	6.97	-5.51	5.54e-08	6.3e-07	-3.22	0.00126073	------	0.00383319	1	0.84	0.92			16	71461500	71516295	105	16	54162	1.32	0.093545	-	1
22937	SCAP	NP_036367.2	1.15	9.37	6.43	2.8e-10	7.07e-09	1.19	9.37	7.22	1.74e-12	6.13e-11	0.61	0.54174	+-?-++	0.642821	1	1.08	1.03			3	47435184	47537603	89	9	54162	-0.03	0.51203	-	1
8837	CFLAR	NP_003870.3	1.18	10.91	6.42	2.83e-10	7.15e-09	1.14	10.91	4.53	7.13e-06	4.85e-05	6	1.96e-09	++?+++	5.22e-08	4.62e-05	1.58	1.23	0.6821	0.5376	2	201960877	202057411	178	19	54162	-0.09	0.53709	+	1	Yes
11070	TMEM115	NP_008955.1	1.07	7.75	6.42	2.89e-10	7.3e-09	1.09	7.75	7.37	6.05e-13	2.36e-11	2.56	0.0103686	--+++-	0.0238325	1	1.21	1.01			3	50372180	50416939	26	5	54162	-1.18	0.88184	-	1
2189	FANCG	NP_004620.1	1.07	7.21	6.42	2.92e-10	7.37e-09	1.08	7.21	6.62	8.13e-11	1.9e-09	1.94	0.052711	+-+++-	0.0955613	1	1.17	1.04			9	35053833	35100043	83	12	54162	-0.54	0.706	-	1
1955	MEGF9	NP_001073966.1	1.12	7.62	6.42	2.95e-10	7.42e-09	1.07	7.62	3.36	0.000826029	0.00328334	0.12	0.902728	++?---	0.932449	1	1.3	1.07			9	123343196	123496765	172	9	54162	-0.41	0.65936	-	1	Yes
26589	MRPL46	NP_071446.2	0.93	7.49	-6.41	3.06e-10	7.7e-09	0.92	7.49	-6.41	3.14e-10	6.3e-09	-3.63	0.000286426	--+---	0.00106893	1	0.64	0.87			15	88982709	89030633	18	4	54162	0.73	0.23196	-	1
51118	UTP11L	NP_057121.1	0.93	7.46	-6.41	3.07e-10	7.72e-09	0.92	7.46	-6.78	3.01e-11	7.78e-10	-6.09	1.16e-09	--?---	3.46e-08	2.73e-05	0.73	0.87	-0.6067	-0.5251	1	38458384	38510497	66	14	54162	-0.57	0.71537	+	1
3423	IDS	NP_006114.1	1.11	8.92	6.41	3.1e-10	7.76e-09	1.07	8.92	3.6	0.000346783	0.00153888	-6.99	2.76e-12	--?---	2.8e-10	6.49e-08	0.79	0.83	-0.717	-0.6179											Yes
5210	PFKFB4	NP_004558.1	1.16	9.8	6.41	3.1e-10	7.76e-09	1.1	9.8	3.59	0.000354058	0.00156652	3.26	0.00113355	+-++++	0.0034971	1	1.27	1.08			3	48535117	48618607	76	9	54162	1.32	0.092788	-	1	Yes
55153	SDAD1	NP_060585.2	0.9	8.94	-6.41	3.1e-10	7.76e-09	0.91	8.94	-5.18	3.06e-07	2.91e-06	-1.21	0.227728	+-?+--	0.324184	1	1.34	1.01			4	76851064	76932115	167	16	54162	2.42	0.0078119	-	1
404093	CUEDC1	NP_060419.1	1.15	8.51	6.41	3.11e-10	7.78e-09	1.13	8.51	5.01	7.34e-07	6.33e-06	2.26	0.0241251	++++++	0.049332	1	1.63	1.18			17	55918604	56052684	305	49	54162	0.98	0.1637	-	1
153339	TMEM167	NP_777569.1	0.94	6.96	-6.4	3.2e-10	7.98e-09	0.94	6.96	-5.67	2.27e-08	2.86e-07	-0.88	0.380751	++?---	0.490075	1	1.21	1.02			5	82328665	82393272	133	10	54162	-0.92	0.82228	-	1
5330	PLCB2	NP_004564.2	1.15	9.29	6.4	3.22e-10	8.03e-09	1.21	9.29	7.63	9.74e-14	4.52e-12	3.04	0.00235399	???+++	0.00661999	1	1.1	1.07			15	40556461	40620174	133	30	54162	2.13	0.016697	-	1	Yes
57037	ANKMY2	NP_064715.1	0.94	7.04	-6.4	3.27e-10	8.14e-09	0.92	7.04	-7.43	4.12e-13	1.67e-11	-5.18	2.24e-07	------	2.42e-06	0.00527036	0.72	0.84	-0.5975	-0.4744	7	16619401	16705442	257	30	54162	-1.13	0.87027	-	1
3654	IRAK1	NP_001020414.1	1.09	8.65	6.4	3.31e-10	8.23e-09	1.07	8.65	4.39	1.37e-05	8.68e-05	4.84	1.29e-06	++?++-	1.06e-05	0.0304629	1.52	1.16
11188	NISCH	NP_009115.2	1.1	8.49	6.4	3.31e-10	8.23e-09	1.12	8.49	6.84	2.03e-11	5.45e-10	1.92	0.0544904	--?+++	0.0983553	1	0.93	1.01			3	52469524	52547088	99	10	54162	0.34	0.36704	+	1
10616	RBCK1	NP_006453.1	1.11	8.31	6.39	3.37e-10	8.34e-09	1.14	8.31	6.97	8.73e-12	2.59e-10	3.77	0.000165965	++?+++	0.000666752	1	1.2	1.11			20	368696	431610	165	30	54162	0.63	0.26297	+	1
2580	GAK	NP_005246.1	1.12	9.78	6.39	3.5e-10	8.63e-09	1.16	9.78	7.17	2.43e-12	8.24e-11	3.3	0.000962146	+-?+++	0.00303354	1	1.45	1.1			4	823065	946174	410	36	54162	-0.06	0.5259	-	1
84270	C9orf89	NP_115686.3	1.09	8.17	6.38	3.68e-10	9.06e-09	1.06	8.17	3.77	0.000179497	0.000867412	0.31	0.759109	--?-++	0.824874	1	0.94	0.99			9	95838450	95895565	176	29	54162	1.86	0.031142	+	1
90324	CCDC97	NP_443080.1	1.08	8.4	6.38	3.75e-10	9.23e-09	1.09	8.4	6.44	2.54e-10	5.22e-09	0.36	0.716717	+-+---	0.79142	1	1.3	1.04			19	41796094	41850788	79	6	54162	1.63	0.051643	+	1
9922	IQSEC1	NP_055684.3	1.11	8.76	6.38	3.8e-10	9.33e-09	1.11	8.76	5.62	2.96e-08	3.62e-07	-4.59	4.43e-06	--?---	2.98e-05	0.104291	0.67	0.87		-0.4844	3	12918542	13134652	588	65	54162	0.61	0.27197	-	1
56996	SLC12A9	NP_064631.2	1.13	9.96	6.37	3.86e-10	9.46e-09	1.15	9.96	6.64	7.48e-11	1.76e-09	2.91	0.0036461	--++++	0.00968533	1	1.2	1.04			7	100430337	100484634	97	13	54162	0.06	0.47767	+	1
20	ABCA2	NP_997698.1	1.07	7.07	6.37	3.87e-10	9.47e-09	1.05	7.07	4.71	3.09e-06	2.31e-05	3.11	0.00185277	++?+++	0.00537025	1	1.59	1.17			9	139881686	139943374	97	11	54162	-0.88	0.80922	-	1
3276	PRMT1	NP_938075.2	0.92	8.52	-6.37	3.89e-10	9.52e-09	0.96	7.49	-2.91	0.00378325	0.0123748	-3.99	6.55e-05	--+---	0.000299516	1	0.77	0.91	-0.4772		19	50160409	50211707	68	11	54162	-1.19	0.88304	+	1	Yes
10043	TOM1	NP_005479.1	1.14	9.18	6.37	3.92e-10	9.59e-09	1.13	9.18	5	7.5e-07	6.46e-06	-1.84	0.0661568	?-----	0.115824	1	0.92	0.97			22	35675268	35763987	227	20	54162	-0.68	0.75203	+	1
729776	LOC729776	XP_001133820.1	0.95	7.28	-6.37	4.01e-10	9.78e-09	0.95	7.28	-5.62	3.08e-08	3.74e-07
23214	XPO6	NP_055986.1	1.17	10.29	6.37	4.02e-10	9.79e-09	1.14	10.29	4.92	1.13e-06	9.31e-06	-2.96	0.00305458	+-?--+	0.0082989	1	1.26	1.02			16	28089297	28243281	135	6	54162	0.33	0.3717	-	1
51522	TMEM14C	NP_057546.1	0.87	8.44	-6.37	4.04e-10	9.82e-09	0.82	8.44	-8.09	3.63e-15	2.45e-13	-0.65	0.513055	-++---	0.61684	1	1.13	0.99			6	10703148	10761577	64	7	54162	-0.61	0.72783	+	1
8417	STX7	NP_003560.1	0.91	7.41	-6.36	4.09e-10	9.93e-09	0.89	7.41	-6.77	3.15e-11	8.08e-10	-4	6.34e-05	--+---	0.000291331	1	0.72	0.92			6	132758663	132854337	257	28	54162	-0.67	0.74819	-	1
4296	MAP3K11	NP_002410.1	1.13	8.47	6.36	4.09e-10	9.93e-09	1.16	8.47	6.85	1.97e-11	5.29e-10	3.28	0.00104889	++?+++	0.00326894	1	1.38	1.13			11	65345226	65401720	79	14	54162	1.05	0.14628	-	1
4851	NOTCH1	NP_060087.3	1.15	9.21	6.36	4.11e-10	9.97e-09	1.15	9.21	5.81	1.05e-08	1.44e-07	3.22	0.00128716	++?++-	0.00390143	1	1.53	1.16		0.4837	9	139368896	139460238	213	35	54162	-1.47	0.92882	-	1
130355	LOC130355	NP_001017927.2	0.95	6.83	-6.36	4.17e-10	1.01e-08	0.95	6.83	-6.16	1.42e-09	2.44e-08	-2.09	0.0365779	-+?---	0.070225	1	0.92	0.97			2	120039793	120144451	340	26	54162	0.78	0.21869	-	1
51150	SDF4	NP_057260.2	0.91	8.01	-6.36	4.2e-10	1.02e-08	0.97	8.01	-2.18	0.0299338	0.0729776	0.16	0.869889	+-+-++	0.908257	1	1.18	1.04			1	1132288	1187447	173	10	54162	-0.88	0.81103	-	1
8517	IKBKG	NP_001093326.1	1.09	9.17	6.35	4.32e-10	1.04e-08	1.11	9.17	6.58	1.09e-10	2.44e-09	2.41	0.0160297	--?++?	0.0346767	1	0.68	0.92
4602	MYB	NP_005366.2	0.93	7.11	-6.35	4.55e-10	1.1e-08	0.93	7.11	-5.43	8.29e-08	8.98e-07	-6.49	8.4e-11	???---	4.17e-09	1.98e-06	0.8	0.88	-0.645	-0.5095	6	135482453	135560311	145	24	54162	0.43	0.33304	+	1
54989	ZNF770	NP_054825.2	0.92	7.18	-6.35	4.56e-10	1.1e-08	0.91	7.18	-6.41	3.15e-10	6.32e-09	2.07	0.038516	+-?+++	0.0733832	1	1.33	1.09			15	35250542	35300497	134	14	54162	1.28	0.10062	-	1
375	ARF1	NP_001019398.1	1.09	9.8	6.34	4.59e-10	1.1e-08	1.07	9.8	4.1	4.76e-05	0.000263689	-4.52	6.23e-06	--?--?	4e-05	0.146626	0.89	0.95		-0.4892	1	228250361	228306913	59	10	54162	0.12	0.45279	+	1
9647	PPM1F	NP_055449.1	1.17	10.36	6.34	4.61e-10	1.11e-08	1.14	10.36	4.78	2.25e-06	1.73e-05	1.58	0.115148	++++++	0.184742	1	1.13	1.06	-0.5413	-0.4854	22	22253792	22327250	170	16	54162	-0.95	0.83006	-	1
2745	GLRX	NP_002055.1	0.82	9.06	-6.34	4.72e-10	1.13e-08	0.74	9.06	-8.37	4.59e-16	3.68e-14	-0.96	0.336262	-+?-+-	0.44361	1	0.49	0.85			5	95129553	95178577	144	27	54162	0.45	0.32775	-	1
49856	WDR8	NP_060288.2	1.06	8.25	6.34	4.84e-10	1.16e-08	1.05	8.25	4.62	4.72e-06	3.37e-05	0.71	0.479872	+++-+-	0.586139	1	1.22	1.04			1	3527331	3586671	129	19	54162	-1.3	0.90379	-	1
10623	POLR3C	NP_006459.3	0.94	8.15	-6.33	4.86e-10	1.16e-08	0.97	8.15	-2.52	0.0119029	0.0334191	-4.32	1.53e-05	???---	8.6e-05	0.360951	0.81	0.9	-0.4911	-0.4587	1	145572605	145630972	33	4	54162	-0.04	0.51711	-	1
10542	HBXIP	NP_006393.2	0.91	9.66	-6.33	4.95e-10	1.18e-08	0.85	9.66	-9.43	1e-19	2.11e-17	-4.49	7.14e-06	--+---	4.49e-05	0.168091	0.64	0.9			1	110923875	110970546	99	11	54162	0.11	0.45554	-	1
57189	KIAA1147	NP_001073861.1	0.89	8.35	-6.33	5.09e-10	1.22e-08	0.91	8.35	-4.53	7.22e-06	4.91e-05	0.13	0.897184	-+?+--	0.928638	1	0.74	0.96			7	141336528	141421953	122	15	54162	1.52	0.064682	-	1	Yes
2287	FKBP3	NP_002004.1	0.92	7.12	-6.33	5.12e-10	1.22e-08	0.91	7.12	-6.13	1.68e-09	2.83e-08	-4.42	9.93e-06	-+----	5.95e-05	0.233754	0.82	0.91	-0.6356	-0.5075	14	45564802	45623732	72	7	54162	0.39	0.34816	-	1
2841	GPR18	NP_001091670.1	0.9	7.52	-6.32	5.17e-10	1.23e-08	0.9	7.52	-5.46	7.25e-08	7.96e-07	1.17	0.24102	???++-	0.339572	1	1.05	1.02			13	99886967	99930682	61	13	54162	-0.75	0.77352	-	1	Yes
10725	NFAT5	NP_775322.1	1.1	7.79	6.32	5.19e-10	1.24e-08	1.1	7.79	5.46	7.14e-08	7.86e-07	5.62	1.88e-08	++++++	3.22e-07	0.00044325	2.63	1.29	0.607	0.5062	16	69579869	69758569	324	17	54162	1.29	0.098946	+	1
10620	ARID3B	NP_006456.1	1.09	8.26	6.32	5.24e-10	1.25e-08	1.09	8.26	5.94	5.03e-09	7.55e-08	2.95	0.00319039	+??+++	0.00861881	1	1.27	1.11			15	74813518	74910472	127	9	54162	1.44	0.074635	+	1
4037	LRP3	NP_002324.1	1.11	7.47	6.32	5.34e-10	1.27e-08	1.09	7.47	4.59	5.53e-06	3.87e-05	1.96	0.0499599	++++-+	0.0912983	1	1.52	1.12			19	33665599	33719773	135	25	54162	0.18	0.43049	+	1
11153	FICD	NP_009007.2	1.08	7.46	6.32	5.35e-10	1.27e-08	1.09	7.46	6.29	6.35e-10	1.18e-08	1.98	0.0475869	+-+++-	0.0876494	1	1.21	1.06			12	108889051	108933380	152	20	54162	-0.29	0.61413	+	1
26173	INTS1	XP_947637.2	1.08	7.33	6.32	5.37e-10	1.27e-08	1.11	7.33	7.92	1.3e-14	7.59e-13	-2.45	0.0143593	-----+	0.0315889	1	0.88	0.96			7	1489913	1564018	166	7	54162	1.74	0.041032	-	1
7593	MZF1	NP_932172.1	1.1	8.17	6.32	5.43e-10	1.29e-08	1.12	8.17	7.02	6.4e-12	1.97e-10	3.47	0.00052676	++?+++	0.00180338	1	1.27	1.08			19	59053284	59105757	82	10	54162	-1.32	0.90724	-	1	Yes
642031	LOC642031	XP_941194.2	1.09	8.02	6.32	5.45e-10	1.29e-08	1.13	8.02	7.8	3.09e-14	1.63e-12	2.61	0.00895866	???++?	0.0209971	1	1.12	1.1
221302	ZUFSP	NP_659499.1	0.94	6.95	-6.31	5.51e-10	1.3e-08	0.93	6.95	-6.68	5.71e-11	1.39e-09	-3.52	0.000439596	------	0.00154314	1	0.76	0.91			6	116936781	117009973	168	16	54162	0.1	0.46038	-	1
488	ATP2A2	NP_733765.1	1.06	7.45	6.31	5.55e-10	1.31e-08	1.06	7.45	5.06	5.64e-07	5.02e-06	-6.05	1.41e-09	------	4.05e-08	3.31e-05	0.51	0.77	-0.6726	-0.5462	12	110699032	110808898	111	18	54162	0.05	0.48063	+	1
1174	AP1S1	NP_001274.1	0.95	7.03	-6.31	5.58e-10	1.32e-08	0.93	7.03	-7.43	3.97e-13	1.62e-11	-5.96	2.54e-09	--?---	6.46e-08	5.97e-05	0.73	0.81	-0.6904	-0.5752	7	100777685	100824557	128	19	54162	1.85	0.032107	+	1
642361	LOC642361	XP_935841.2	1.05	7.17	6.31	5.59e-10	1.32e-08	1.04	7.17	4.21	2.97e-05	0.000172328	3.22	0.00126017	++????	0.00383197	1	1.53	1.33
10247	HRSP12	NP_005827.1	0.96	6.77	-6.31	5.67e-10	1.33e-08	0.95	6.77	-7.11	3.47e-12	1.13e-10	-3.32	0.000900149	--?---	0.00286417	1	0.79	0.88			8	99094567	99149418	167	26	54162	-1.06	0.85503	-	1
3678	ITGA5	NP_002196.2	1.15	8.77	6.31	5.69e-10	1.34e-08	1.17	8.77	6.52	1.52e-10	3.28e-09	6.05	1.42e-09	?+?+++	4.06e-08	3.35e-05	1.71	1.32	0.6536	0.4901	12	54769045	54833050	58	15	54162	0.34	0.36615	-	1
79720	VPS37B	NP_078943.1	1.12	8.73	6.31	5.75e-10	1.35e-08	1.13	8.73	6.04	2.87e-09	4.56e-08	-1.09	0.274424	+-+-+-	0.37746	1	1.06	1			12	123329875	123400712	91	8	54162	0.73	0.23421	-	1
23569	PADI4	NP_036519.1	1.24	10.82	6.3	5.84e-10	1.37e-08	1.15	10.82	3.63	0.00030672	0.00138306	-2.16	0.030837	???---	0.0607277	1	0.92	0.94			1	17614690	17710495	467	35	54162	-0.5	0.69184	+	1	Yes
23315	SLC9A8	NP_056081.1	1.1	7.79	6.3	5.87e-10	1.37e-08	1.09	7.79	4.89	1.33e-06	1.08e-05	2.16	0.0304311	++?+++	0.0600424	1	1.14	1.05			20	48409250	48528779	335	22	54162	2.49	0.0064611	+	1
23517	SKIV2L2	NP_056175.2	0.91	7.16	-6.3	5.97e-10	1.39e-08	0.9	7.16	-6.73	4.1e-11	1.03e-09	-2.61	0.00896095	-+?---	0.020999	1	0.65	0.9			5	54583576	54741409	297	8	54162	0.41	0.34156	+	1
8241	RBM10	NP_690595.1	1.1	9.95	6.3	6.01e-10	1.4e-08	1.16	9.95	8.24	1.22e-15	9.05e-14	0.65	0.516923	+-+-++	0.62054	1	1.37	1.07
51588	PIAS4	NP_056981.2	1.11	9.05	6.29	6.19e-10	1.44e-08	1.15	9.05	7.81	2.77e-14	1.49e-12	5.89	3.75e-09	++++++	8.62e-08	8.83e-05	1.78	1.27			19	3987749	4058067	135	12	54162	-0.38	0.64799	+	1
10908	PNPLA6	NP_006693.3	1.12	9.19	6.29	6.44e-10	1.5e-08	1.18	9.19	8.48	1.98e-16	1.75e-14	3.82	0.000133701	++?+++	0.000554065	1	1.15	1.09			19	7579033	7646653	244	29	54162	-0.85	0.80279	+	1	Yes
10904	BLCAP	NP_006689.1	0.95	7.94	-6.29	6.46e-10	1.5e-08	0.97	7.94	-3.28	0.00109438	0.00420385	-4.5	6.79e-06	+-?---	4.3e-05	0.159847	0.79	0.91	-0.6089	-0.4921	20	36125819	36176333	62	5	54162	0	0.50189	-	1
151888	BTLA	NP_861445.2	0.92	7.02	-6.29	6.48e-10	1.51e-08	0.9	7.02	-6.38	3.72e-10	7.36e-09	0.48	0.632762	???+--	0.721361	1	1.03	1			3	112162813	112238438	133	15	54162	-1.69	0.95479	-	1	Yes
1207	CLNS1A	NP_001284.1	0.87	8.35	-6.29	6.49e-10	1.51e-08	0.85	8.35	-6.61	8.81e-11	2.05e-09	-3.04	0.00239114	++----	0.00671003	1	1.78	1.06			11	77307196	77368851	109	10	54162	-0.3	0.61738	-	1	Yes
54815	GATAD2A	NP_060130.2	1.1	9.59	6.28	6.63e-10	1.54e-08	1.12	9.59	6.53	1.44e-10	3.12e-09	5.82	5.72e-09	++++++	1.22e-07	0.000134695	1.27	1.14		0.4556	19	19476642	19639741	218	12	54162	0.47	0.31781	+	1
3551	IKBKB	NP_001547.1	1.07	8.08	6.28	6.65e-10	1.54e-08	1.08	8.08	6.07	2.35e-09	3.84e-08	5.23	1.73e-07	+++++-	1.95e-06	0.00408085	1.85	1.24	0.6772	0.5866	8	42108820	42210171	139	12	54162	-0.46	0.67548	+	1
340371	NRBP2	NP_848659.1	1.07	7.41	6.28	6.66e-10	1.54e-08	1.06	7.41	4.69	3.43e-06	2.53e-05	-5.29	1.24e-07	+----+	1.48e-06	0.00292616	0.77	0.95			8	144895755	144944200	50	7	54162	0.3	0.38395	-	1
10480	EIF3M	NP_006351.2	0.89	9.14	-6.28	6.72e-10	1.55e-08	0.91	9.14	-4.89	1.3e-06	1.06e-05	-2.34	0.019473	--?+--	0.0411053	1	0.71	0.88			11	32585313	32644037	168	21	54162	0.41	0.3393	+	1	Yes
51025	Magmas	NP_057153.8	1.07	8.11	6.28	6.83e-10	1.58e-08	1.07	8.11	5.14	3.79e-07	3.51e-06	-2.17	0.0299552	--+--?	0.0592457	1	0.82	0.94	-0.6176	-0.5544	16	4370252	4421373	87	11	54162	-1.21	0.88767	-	1
5423	POLB	NP_002681.1	0.9	8.27	-6.28	6.85e-10	1.58e-08	0.86	8.27	-7.35	7.06e-13	2.71e-11	-4.67	2.97e-06	------	2.12e-05	0.0699584	0.69	0.87			8	42175973	42249331	116	11	54162	-0.41	0.65955	+	1
1738	DLD	NP_000099.2	0.93	7.14	-6.28	6.85e-10	1.58e-08	0.92	7.14	-6.38	3.66e-10	7.27e-09	-4.71	2.5e-06	--?---	1.84e-05	0.0587111	0.66	0.83			7	107511586	107581643	129	9	54162	-0.44	0.6716	+	1
51001	MTERFD1	NP_057026.3	0.92	7.3	-6.28	6.91e-10	1.59e-08	0.91	7.2	-7.15	2.74e-12	9.1e-11	-2.66	0.00784615	-+----	0.0187222	1	0.81	0.93			8	97231645	97293796	82	8	54162	1.26	0.10416	-	1	Yes
26065	LSM14A	NP_056393.1	0.89	8.9	-6.27	7.11e-10	1.63e-08	0.86	8.9	-7.15	2.71e-12	9.02e-11	4.14	3.49e-05	+++++-	0.000173579	0.821377	1.7	1.16	0.4202		19	34643352	34740420	216	17	54162	-1.62	0.94756	+	1
728554	LOC728554		0.87	8.41	-6.27	7.26e-10	1.67e-08	0.89	8.41	-4.6	5.24e-06	3.69e-05
5777	PTPN6	NP_536858.1	1.12	10.59	6.27	7.27e-10	1.67e-08	1.17	10.59	7.71	5.66e-14	2.75e-12	5.48	4.27e-08	++?+++	6.26e-07	0.00100491	1.21	1.11
3059	HCLS1	NP_005326.1	1.13	12.14	6.26	7.4e-10	1.69e-08	1.12	12.14	5.3	1.69e-07	1.71e-06	7.71	1.31e-14	++++++	5.05e-12	3.08e-10	1.63	1.34	0.6431	0.4898	3	121330246	121399791	162	22	54162	-1.3	0.90388	-	1
51018	RRP15	NP_057136.2	0.94	6.94	-6.26	7.47e-10	1.71e-08	0.93	6.94	-7.24	1.51e-12	5.4e-11	0.67	0.505414	--?++-	0.610085	1	0.72	0.93			1	218438629	218531325	138	12	54162	1.19	0.11722	+	1	Yes
2976	GTF3C2	NP_001030598.1	1.07	7.42	6.26	7.47e-10	1.71e-08	1.08	7.42	6.17	1.34e-09	2.32e-08	1.51	0.130323	-+?+++	0.204816	1	0.85	0.98			2	27528716	27600243	57	10	54162	0.29	0.38442	-	1
9667	SAFB2	NP_055464.1	1.09	8.85	6.26	7.48e-10	1.71e-08	1.11	8.85	6.59	1.04e-10	2.34e-09	6.27	3.58e-10	++?+++	1.32e-08	8.43e-06	1.55	1.24	0.6777	0.526	19	5567007	5642991	154	17	54162	-1.43	0.92433	-	1
253018	HCG27	NP_859068.2	1.16	8.73	6.26	7.48e-10	1.71e-08	1.06	8.73	2.26	0.024334	0.0614365	2.27	0.0234002	???+++	0.0480669	1	1.14	1.07													Yes
7360	UGP2	NP_006750.3	0.89	8.85	-6.26	7.55e-10	1.72e-08	0.87	8.85	-6.98	8.14e-12	2.44e-10	-3.52	0.000426908	++?---	0.00150534	1	1.55	1.02	-0.6166	-0.4696	2	64048084	64138696	169	27	54162	-0.76	0.77527	+	1
10922	FASTK	NP_148936.2	1.06	7.31	6.26	7.63e-10	1.74e-08	1.07	7.31	6.27	7.09e-10	1.3e-08	2.79	0.00532091	+-?+++	0.0134163	1	1.32	1.08			7	150753708	150797970	93	13	54162	-1.09	0.86181	-	1
9861	PSMD6	NP_055629.1	0.91	9.21	-6.26	7.76e-10	1.76e-08	0.87	9.21	-7.92	1.23e-14	7.19e-13	-2.7	0.00683285	-+----	0.0166143	1	0.58	0.88		0.4881	3	63976225	64029686	125	23	54162	-1.36	0.91312	-	1
5871	MAP4K2	NP_004570.2	1.1	9.89	6.26	7.77e-10	1.76e-08	1.1	9.89	5.92	5.49e-09	8.12e-08	-0.27	0.784145	?++---	0.844552	1	1.08	1			11	64536609	64590720	42	7	54162	-1.17	0.87817	-	1
9948	WDR1	NP_005103.2	1.11	11.2	6.25	7.96e-10	1.81e-08	1.11	11.2	5.6	3.29e-08	3.97e-07	2.83	0.00460827	+-?++-	0.0118415	1	1.82	1.14		0.4744	4	10055963	10138612	342	21	54162	-0.09	0.53451	-	1	Yes
7414	VCL	NP_054706.1	1.15	10.73	6.25	8.21e-10	1.86e-08	1.15	10.73	5.54	4.73e-08	5.48e-07	3.59	0.000327625	++?+++	0.00119854	1	1.32	1.12			10	75737836	75899918	211	22	54162	1.72	0.042322	+	1	Yes
51060	TXNDC12	NP_056997.1	0.85	9.56	-6.25	8.28e-10	1.87e-08	0.86	9.56	-5.22	2.53e-07	2.45e-06	-0.7	0.482519	-+--+-	0.588395	1	0.89	0.96	0.5415		1	52465803	52541843	100	8	54162	0.37	0.35696	-	1
55471	C2orf56	NP_001077415.1	0.94	7.22	-6.24	8.37e-10	1.89e-08	0.92	7.22	-7.74	4.72e-14	2.34e-12	-4	6.39e-05	+-?---	0.000293389	1	1.14	0.97			2	37438774	37496303	153	22	54162	1.97	0.024611	+	1
29933	GPR132	NP_037477.1	1.06	7.34	6.24	8.44e-10	1.91e-08	1.08	7.34	7.1	3.65e-12	1.18e-10	7.19	6.71e-13	???+++	9.75e-11	1.58e-08	1.27	1.17			14	105495726	105551887	105	9	54162	2.27	0.011502	-	1
2268	FGR	NP_001036194.1	1.12	11.85	6.24	8.49e-10	1.92e-08	1.1	11.85	4.44	1.09e-05	7.06e-05	5.21	1.9e-07	?+?+++	2.1e-06	0.00446241	1.28	1.14	0.6193	0.4769	1	27918800	27981727	39	5	54162	-1.03	0.8479	-	1	Yes
56970	ATXN7L3	NP_001092303.1	1.08	8.44	6.24	8.51e-10	1.92e-08	1.12	8.44	7.76	3.89e-14	1.97e-12	-1.14	0.254009	--?+--	0.35409	1	0.73	0.91			17	42249173	42295747	68	10	54162	0.85	0.19691	-	1
57414	RHBDD2	NP_001035546.1	1.11	9.39	6.24	8.58e-10	1.93e-08	1.18	9.27	8.55	1.17e-16	1.09e-14	-5.08	3.85e-07	--?---	3.79e-06	0.00906086	0.59	0.78	-0.6705	-0.5593	7	75488317	75538244	75	15	54162	0.84	0.19928	+	1
56985	C17orf48	NP_064618.3	0.94	6.99	-6.24	8.74e-10	1.97e-08	0.92	6.99	-7.33	8.14e-13	3.09e-11	-0.59	0.552259	--?+-+	0.652244	1	0.78	0.94			17	10580927	10636264	121	2	54162	-0.46	0.67716	+	1	Yes
84527	ZNF559	NP_115886.1	0.93	7.2	-6.23	8.86e-10	1.99e-08	0.93	7.2	-5.85	8.32e-09	1.17e-07	-0.26	0.793	--++--	0.851323	1	0.73	0.94	-0.4995	-0.4551	19	9414448	9481838	129	8	54162	1.4	0.080988	+	1
1609	DGKQ	NP_001338.2	1.13	8.23	6.23	8.93e-10	2.01e-08	1.17	8.23	7.37	5.99e-13	2.34e-11	-3.31	0.000927164	+-?--+	0.00293741	1	0.9	0.98			4	932672	987348	125	20	54162	1.51	0.06492	-	1
84520	C14orf142	NP_115879.2	0.93	6.92	-6.23	9.02e-10	2.02e-08	0.92	6.92	-6.77	3.25e-11	8.3e-10	0.92	0.35514	-+?+--	0.4635	1	0.79	0.95			14	93649237	93693459	105	17	54162	0.19	0.42536	-	1
1196	CLK2	XP_946485.1	1.07	7.85	6.23	9.08e-10	2.04e-08	1.08	7.85	6.6	9.32e-11	2.14e-09	3.87	0.000108607	-+?+++	0.000462789	1	0.79	1		0.4424	1	155212659	155263305	59	3	54162	-0.87	0.80669	-	1
5430	POLR2A	NP_000928.1	1.15	9.54	6.23	9.12e-10	2.04e-08	1.19	9.54	6.74	3.84e-11	9.65e-10	0.63	0.528838	--+++-	0.631204	1	0.87	0.98			17	7367698	7437935	239	15	54162	-0.61	0.72837	+	1
11083	DIDO1	NP_542987.2	1.07	7.6	6.23	9.14e-10	2.05e-08	1.06	7.6	4.43	1.11e-05	7.2e-05	-4	6.42e-05	-+?---	0.000294379	1	1.2	0.95	-0.5007	-0.4047	20	61489090	61589304	276	29	54162	0.74	0.22854	-	1
57153	SLC44A2	NP_065161.2	1.14	10.52	6.23	9.24e-10	2.06e-08	1.13	10.52	4.99	7.85e-07	6.72e-06	2.92	0.00351947	+-++++	0.00940096	1	1.45	1.12			19	10693121	10775235	191	21	54162	0.5	0.30833	+	1
8569	MKNK1	NP_003675.2	1.13	9.18	6.23	9.38e-10	2.09e-08	1.1	9.18	4.32	1.88e-05	0.000114501	5.01	5.54e-07	++?+++	5.16e-06	0.0130473	2.42	1.27			1	47003079	47089966	164	18	54162	0.64	0.26	-	1
84875	PARP10	NP_116178.1	1.13	8.2	6.22	9.39e-10	2.09e-08	1.12	8.2	5.19	2.92e-07	2.79e-06	4.56	5.01e-06	++?+++	3.32e-05	0.117774	1.63	1.19		0.4564	8	145031320	145080635	74	5	54162	1.14	0.12695	-	1
8907	AP1M1	NP_115882.1	1.11	9.13	6.22	9.4e-10	2.1e-08	1.14	9.13	6.64	7.56e-11	1.78e-09	-1.77	0.0760306	---+--	0.130052	1	0.73	0.9		-0.4697	19	16288665	16366156	225	11	54162	0.93	0.17667	+	1
9146	HGS	NP_004703.1	1.1	9.51	6.22	9.57e-10	2.13e-08	1.13	9.51	7.49	2.68e-13	1.14e-11	1.13	0.259848	+-++++	0.360743	1	1.12	1.02	-0.5337	-0.4644	17	79630962	79689151	238	15	54162	-0.21	0.58261	+	1
6845	VAMP7	NP_005629.1	0.87	8.03	-6.22	9.66e-10	2.15e-08	0.82	8.03	-7.97	9.06e-15	5.53e-13	-3.15	0.00160846	------	0.0047303	1	0.69	0.89
161253	REM2	NP_775798.2	1.12	7.63	6.22	9.73e-10	2.16e-08	1.08	7.63	3.62	0.000325356	0.00145773	-5.77	8.14e-09	-??---	1.62e-07	0.000191581	0.86	0.92	-0.552	-0.4781	14	23332374	23376889	63	11	54162	0.08	0.46829	+	1
81622	UNC93B1	NP_112192.2	1.13	8.96	6.22	9.76e-10	2.17e-08	1.11	8.96	4.97	8.89e-07	7.49e-06	4.4	1.11e-05	???+++	6.51e-05	0.260376	1.2	1.13		0.4585	11	67738575	67791593	127	11	54162	-0.04	0.5167	-	1
414059	TBC1D3B	NP_001001417.4	1.09	7.33	6.22	9.79e-10	2.17e-08	1.1	7.33	6.44	2.61e-10	5.35e-09	0.45	0.651407	???-+?	0.737329	1	1.05	1.02
79699	ZYG11B	NP_078922.1	1.13	9.31	6.22	9.93e-10	2.2e-08	1.14	9.31	5.97	4.16e-09	6.39e-08	-3.16	0.0015658	++?---	0.0046211	1	1.28	0.99		-0.453	1	53172126	53313014	318	14	54162	-0.52	0.69854	+	1
55072	RNF31	NP_060469.4	1.11	8.28	6.21	1.01e-09	2.25e-08	1.14	8.28	7.15	2.65e-12	8.83e-11	-4.07	4.74e-05	???---	0.000226486	1	0.9	0.94	-0.5442	-0.4657	14	24596101	24649870	71	15	54162	-0.27	0.60583	+	1
441155	LOC441155	XP_941527.1	1.06	7.3	6.21	1.03e-09	2.27e-08	1.06	7.3	5.22	2.51e-07	2.44e-06										6	65991311	66035506	95	13	54162	0.86	0.19482	+	1
87	ACTN1	NP_001093.1	1.21	10.72	6.21	1.03e-09	2.27e-08	1.26	10.72	6.73	4.29e-11	1.07e-09	0.16	0.871114	+-+-++	0.909139	1	1.35	1.1	-0.631	-0.5018	14	69320840	69466083	539	53	54162	0.07	0.47348	-	1
116985	CENTD2	NP_001035207.1	1.1	7.97	6.2	1.08e-09	2.38e-08	1.11	7.97	5.61	3.1e-08	3.77e-07	5.46	4.84e-08	++?+++	6.95e-07	0.00113903	1.43	1.18	0.6833	0.5541	11	72376114	72483465	261	20	54162	-0.77	0.77978	-	1
22898	DENND3	NP_055772.2	1.14	8.54	6.2	1.08e-09	2.39e-08	1.13	8.54	5.17	3.33e-07	3.13e-06	1.95	0.0510516	-+?+++	0.0929756	1	0.86	1.02	0.4839		8	142118720	142225903	191	32	54162	0.14	0.44391	+	1
387841	LOC387841	XP_937771.1	0.87	9.34	-6.2	1.1e-09	2.41e-08	0.89	12.51	-4.73	2.84e-06	2.14e-05	1.09	0.275148	???++-	0.378232	1	1.05	1.01
26524	LATS2	NP_055387.2	1.05	7.03	6.2	1.1e-09	2.42e-08	1.04	7.03	4.34	1.65e-05	0.000102123	8.12	4.44e-16	++?+++	3.37e-13	1.04e-11	3.57	1.57	0.712	0.5713	13	21527175	21655722	350	28	54162	-1.07	0.85779	-	1
2584	GALK1	NP_000145.1	1.1	9.31	6.19	1.14e-09	2.5e-08	1.09	9.31	5.08	5.06e-07	4.56e-06	2.53	0.0112764	??++++	0.0256212	1	1.07	1.05			17	73734018	73781280	82	22	54162	-0.87	0.8074	-	1
60626	RIC8A	NP_068751.4	1.08	8.91	6.19	1.17e-09	2.57e-08	1.09	8.91	6.77	3.28e-11	8.34e-10	0.17	0.861189	---++-	0.902457	1	0.87	0.95			11	187499	235113	165	18	54162	-0.63	0.73661	+	1
54820	NDE1	NP_060138.1	1.15	10.25	6.18	1.19e-09	2.61e-08	1.16	10.25	5.86	7.95e-09	1.13e-07	4.55	5.26e-06	++++++	3.45e-05	0.123742	1.83	1.26		0.441	16	15717124	15840210	273	24	54162	-0.05	0.51925	+	1
221955	DAGLB	NP_631918.1	1.08	8.08	6.18	1.22e-09	2.67e-08	1.1	8.08	6.64	7.48e-11	1.76e-09	-1.16	0.245265	---++-	0.344379	1	0.63	0.9			7	6428747	6507837	256	24	54162	2.44	0.007255	-	1
84938	ATG4C	NP_116241.2	0.94	7.3	-6.18	1.23e-09	2.69e-08	0.93	7.3	-5.93	5.4e-09	8e-08	-0.97	0.331436	++?---	0.438326	1	1.2	1.02			1	63229777	63350941	242	12	54162	1.37	0.085035	+	1
5093	PCBP1	NP_006187.1	1.11	11.68	6.18	1.23e-09	2.69e-08	1.07	11.68	3.64	0.000295633	0.00133852	2.2	0.0279351	-++++-	0.0558227	1	0.67	0.97			2	70293972	70336335	63	4	54162	-0.05	0.51909	+	1
51126	NAT5	NP_852669.1	0.9	7.74	-6.18	1.24e-09	2.7e-08	0.89	7.74	-6.36	4.16e-10	8.06e-09	-5.35	8.75e-08	--?---	1.12e-06	0.00205787	0.58	0.84	-0.624	-0.4945	20	19977934	20034273	132	18	54162	2.04	0.020502	+	1
6419	SETMAR	NP_006506.1	0.95	7.06	-6.18	1.24e-09	2.71e-08	0.94	7.06	-6.21	1.04e-09	1.84e-08	0.53	0.593999	-++++-	0.688207	1	0.84	0.98			3	4324988	4378949	130	19	54162	0.55	0.29281	+	1
51291	GMIP	NP_057657.1	1.12	8.44	6.18	1.25e-09	2.72e-08	1.15	8.44	6.93	1.17e-11	3.34e-10	2.19	0.0283292	???+++	0.0564807	1	1.05	1.02			19	19720285	19774457	93	18	54162	-1.25	0.89357	-	1
10983	CCNI	NP_006826.1	1.12	12.79	6.17	1.26e-09	2.75e-08	1.14	12.79	6.59	9.99e-11	2.27e-09	-1.45	0.146851	-++---	0.225873	1	0.64	0.92	-0.6833	-0.554	4	77948308	78018719	117	18	54162	-1.1	0.86387	-	1
6653	SORL1	NP_003096.1	1.21	10.87	6.17	1.29e-09	2.8e-08	1.31	10.87	7.87	1.81e-14	1.02e-12	-2.97	0.00293259	-++---	0.00800669	1	0.62	0.89			11	121302912	121524471	354	49	54162	5.27	6.87e-08	+	0.00125233		Yes
91	ACVR1B	NP_004293.1	1.09	7.74	6.17	1.32e-09	2.85e-08	1.07	7.74	4.34	1.69e-05	0.00010446	-2.92	0.00352621	------	0.00941685	1	0.83	0.92			12	52325451	52410863	132	21	54162	-0.26	0.60295	+	1
652595	LOC652595	XP_947210.1	0.93	7.47	-6.16	1.35e-09	2.92e-08	0.93	7.47	-5.21	2.61e-07	2.52e-06
9842	PLEKHM1	XP_001128220.1	1.09	7.99	6.16	1.35e-09	2.92e-08	1.1	7.99	5.96	4.32e-09	6.61e-08	4.22	2.45e-05	++?++-	0.000127905	0.576086	1.16	1.08	0.5939	0.5116	17	43493266	43588146	200	8	54162	1.85	0.031843	-	1
55839	CENPN	NP_060925.1	0.97	6.76	-6.16	1.35e-09	2.92e-08	0.97	6.76	-5.61	3.25e-08	3.93e-07	-0.73	0.46695	++?---	0.574171	1	0.86	0.99			16	81020103	81086712	217	9	54162	-1.24	0.89186	+	1
54165	DCUN1D1	NP_065691.2	1.13	7.87	6.16	1.39e-09	3e-08	1.08	7.87	3.26	0.00116102	0.00442547	0.05	0.961187	++++--	0.972888	1	1.22	1.02			3	182640153	182723731	108	12	54162	-0.78	0.78333	-	1
79081	C11orf48	NP_077004.2	0.92	8.11	-6.16	1.41e-09	3.03e-08	0.95	8.11	-3.45	0.00060507	0.00250436	-1.15	0.250294	--?--+	0.35004	1	0.96	0.99			11	62410289	62459241	41	4	54162	-0.62	0.73224	-	1
54470	ARMCX6	NP_061880.2	0.94	7.25	-6.16	1.42e-09	3.05e-08	0.93	7.25	-6.37	4.02e-10	7.83e-09	3.5	0.000461541	++?++-	0.00160794	1	1.13	1.05		0.4852
8106	PABPN1	NP_004634.1	1.08	8.7	6.15	1.43e-09	3.07e-08	1.08	8.7	5.37	1.14e-07	1.2e-06	-0.25	0.801365	++--+?	0.857993	1	0.9	1			14	23769397	23815394	50	10	54162	-0.17	0.56791	+	1
80071	CCDC15	NP_079280.1	0.93	7	-6.15	1.45e-09	3.11e-08	0.94	7	-4.54	6.94e-06	4.74e-05	-0.36	0.719422	?-?-+-	0.793736	1	1.1	0.99			11	124804017	124931385	342	20	54162	1.62	0.052539	+	1
8933	FAM127A	NP_001071639.1	1.08	8.03	6.15	1.45e-09	3.12e-08	1.11	8.03	7.51	2.31e-13	1e-11	-3.12	0.00180302	--?--+	0.00523444	1	0.73	0.9		-0.5521
7076	TIMP1	NP_003245.1	1.17	11.14	6.15	1.48e-09	3.17e-08	1.2	11.14	6.22	9.63e-10	1.72e-08	5.11	3.29e-07	+-?+++	3.32e-06	0.00774593	1.76	1.36													Yes
391	RHOG	NP_001656.2	1.14	12.1	6.15	1.48e-09	3.18e-08	1.16	12.1	5.96	4.33e-09	6.63e-08	5.17	2.38e-07	++?+++	2.52e-06	0.00559447	1.32	1.16			11	3828208	3882213	119	18	54162	-0.63	0.73495	-	1
57085	AGTRAP	NP_001035286.1	1.12	8.6	6.14	1.54e-09	3.3e-08	1.08	8.6	4.04	6e-05	0.000324272	4.51	6.52e-06	++?+++	4.15e-05	0.153358	1.45	1.15			1	11776142	11830828	111	20	54162	1.72	0.042558	+	1
8498	RANBP3	NP_015559.1	1.07	8.27	6.14	1.57e-09	3.36e-08	1.1	8.27	7.13	3.1e-12	1.02e-10	3.97	7.1e-05	+-++++	0.000320339	1	1.35	1.09		0.4588	19	5896150	5998320	151	17	54162	-0.62	0.73112	-	1
2597	GAPDH	NP_002037.2	1.09	11.59	6.14	1.59e-09	3.4e-08	1.09	11.59	5.22	2.56e-07	2.47e-06	-2.46	0.0137665	--?---	0.03047	1	0.74	0.9			12	6623585	6667537	100	13	54162	1.76	0.039114	+	1
6426	SFRS1	NP_001071634.1	0.88	8.98	-6.14	1.6e-09	3.41e-08	0.84	8.98	-7.25	1.37e-12	4.94e-11	4.48	7.62e-06	++?+++	4.74e-05	0.1794	1.5	1.16	0.6363	0.5329	17	56058280	56104707	54	6	54162	0.2	0.41884	-	1	Yes
83590	TMUB1	NP_113622.1	1.08	8.34	6.13	1.61e-09	3.44e-08	1.12	8.34	8.09	3.53e-15	2.39e-13	3.4	0.000664137	-+++++	0.00220598	1	1.32	1.07			7	150758172	150800620	96	13	54162	-1.08	0.86075	-	1
4850	CNOT4	NP_037448.2	0.95	7.98	-6.13	1.63e-09	3.47e-08	0.97	7.98	-2.69	0.0073051	0.0219626	0.98	0.327452	++?-+-	0.434028	1	1.2	1.05	0.533	0.4703	7	135026547	135214875	341	31	54162	1.15	0.12465	-	1
10365	KLF2	NP_057354.1	1.12	12.48	6.13	1.64e-09	3.48e-08	1.14	12.48	6.55	1.27e-10	2.78e-09	3.78	0.00015494	++?+++	0.000628142	1	2.33	1.3			19	16415651	16458345	123	18	54162	0.35	0.3638	+	1
207	AKT1	NP_001014432.1	1.11	9.94	6.13	1.64e-09	3.48e-08	1.13	9.94	6.14	1.55e-09	2.63e-08	2.21	0.0273502	++?+++	0.054845	1	1.09	1.03			14	105215686	105282080	131	20	54162	0.51	0.30452	-	1
126208	ZNF787	NP_001002836.2	1.1	8.48	6.13	1.64e-09	3.49e-08	1.1	8.48	5.43	8.16e-08	8.86e-07	2.11	0.0345537	?+?++-	0.0669396	1	1.06	1.03			19	56578732	56652649	98	16	54162	0.92	0.17904	-	1
387680	FAM21A	NP_001005751.1	1.08	7.3	6.13	1.66e-09	3.52e-08	1.08	7.3	5.64	2.63e-08	3.25e-07	-2.44	0.014536	???--?	0.031915	1	0.84	0.9			10	51807610	51913269	82	6	54162	1.96	0.024782	+	1
58527	C6orf115	NP_067066.1	0.91	8.03	-6.13	1.67e-09	3.55e-08	0.89	8.03	-6.97	9.1e-12	2.69e-10	-5.14	2.68e-07	--?---	2.8e-06	0.00630376	0.43	0.76	-0.7013	-0.5682	6	139329819	139384439	147	22	54162	1.31	0.094831	+	1
6341	SCO1	NP_004580.1	0.94	7.6	-6.12	1.71e-09	3.62e-08	0.94	7.6	-5.27	1.96e-07	1.96e-06	-3.79	0.000152103	------	0.000618558	1	0.81	0.91			17	10563649	10620885	125	7	54162	-0.71	0.76181	-	1
10211	FLOT1	NP_005794.1	1.14	9.53	6.12	1.73e-09	3.66e-08	1.14	9.53	5.41	9.19e-08	9.87e-07	2.52	0.0116596	--++++	0.0264001	1	0.72	0.98			6	30675506	30730687	271	21	54162	-0.11	0.5424	-	1
152926	PPM1K	NP_689755.2	0.94	6.99	-6.12	1.77e-09	3.73e-08	0.94	6.99	-5.72	1.69e-08	2.2e-07	1.13	0.257167	+-+++-	0.35771	1	1.26	1.05	0.4723	0.449	4	89158761	89225983	123	24	54162	-1.61	0.94582	-	1
23787	MTCH1	NP_055156.1	1.09	10.66	6.12	1.78e-09	3.75e-08	1.05	10.66	3.4	0.000716415	0.00289907	-4.41	1.01e-05	------	6.04e-05	0.237688	0.76	0.91		-0.4474	6	36915911	36974327	215	25	54162	-0.3	0.6174	-	1
2548	GAA	NP_001073272.1	1.12	7.79	6.11	1.82e-09	3.84e-08	1.16	7.79	6.99	7.82e-12	2.35e-10	0.14	0.888832	---++-	0.92282	1	0.71	0.94			17	78055339	78113680	254	16	54162	-0.92	0.82189	+	1
9857	CEP350	NP_055625.3	1.08	8.37	6.11	1.85e-09	3.89e-08	1.05	8.37	3.36	0.000829717	0.00329569	4.23	2.38e-05	++?+++	0.000124868	0.560032	1.7	1.21	0.6589	0.5799	1	179903908	180104015	474	20	54162	-1.1	0.86365	+	1
84669	USP32	NP_115971.2	1.11	8.06	6.11	1.86e-09	3.92e-08	1.13	8.06	6.3	5.82e-10	1.09e-08	-3.61	0.000308069	++?---	0.00113832	1	1.32	1			17	58234551	58489586	136	5	54162	0.29	0.38426	-	1
7178	TPT1	NP_003286.1	0.82	13.39	-6.1	1.97e-09	4.14e-08	0.81	13.39	-5.7	1.94e-08	2.47e-07	4.55	5.35e-06	-++++?	3.5e-05	0.125778	1.33	1.09		0.4419	13	45891005	45935505	151	19	54162	1.18	0.11988	-	1	Yes
90864	SPSB3	NP_543137.2	1.11	9.69	6.1	2.02e-09	4.25e-08	1.12	9.69	6.04	2.82e-09	4.5e-08	-0.83	0.405586	++---+	0.51446	1	1.16	1.01			16	1806713	1852582	188	13	54162	-0.07	0.52701	-	1
51526	C20orf111	NP_057554.4	0.9	9.2	-6.09	2.05e-09	4.31e-08	0.86	9.2	-7.91	1.39e-14	8.04e-13	0	0.997173	-++--+	0.998064	1	0.69	0.96			20	42804579	42859702	150	27	54162	1.51	0.064936	-	1
93081	C13orf27	NP_620134.2	0.86	7.54	-6.09	2.07e-09	4.34e-08	0.83	7.54	-6.34	4.81e-10	9.2e-09	-2.5	0.0123087	-+?---	0.0276676	1	0.52	0.83			13	103398460	103446168	104	14	54162	-1.38	0.9165	-	1
26269	FBXO8	NP_036312.2	0.94	7.27	-6.09	2.08e-09	4.35e-08	0.93	7.27	-6.95	9.88e-12	2.87e-10	4.47	7.96e-06	++?++-	4.94e-05	0.187408	1.22	1.12	0.605	0.524	4	175137809	175225415	139	19	54162	-1.12	0.86835	-	1
929	CD14	NP_001035110.1	1.17	12.59	6.09	2.09e-09	4.36e-08	1.14	12.59	4.6	5.27e-06	3.71e-05	5.2	1.94e-07	-+?+++	2.14e-06	0.00457019	1.64	1.21			5	139991313	140033286	81	9	54162	3	0.0013332	-	1
51185	CRBN	NP_057386.2	0.84	7.9	-6.09	2.1e-09	4.39e-08	0.8	7.9	-7.3	9.96e-13	3.7e-11	-3.87	0.000108525	-+----	0.000462522	1	0.6	0.85			3	3171317	3241401	276	20	54162	-0.66	0.74497	-	1
10875	FGL2	NP_006673.1	0.85	11.23	-6.09	2.11e-09	4.4e-08	0.85	11.23	-5.37	1.15e-07	1.2e-06	6.39	1.68e-10	++?+++	7.23e-09	3.95e-06	1.62	1.38		0.4596	7	76802688	76849150	77	13	54162	0.04	0.48506	-	1	Yes
1314	COPA	NP_004362.2	1.1	9.64	6.08	2.17e-09	4.51e-08	1.11	9.64	6.04	2.87e-09	4.56e-08	0.6	0.547799	-+-++-	0.648408	1	0.81	0.96			1	160238377	160333354	127	15	54162	0.39	0.34845	-	1
7565	ZNF17	NP_008890.2	0.94	7.04	-6.08	2.17e-09	4.51e-08	0.91	7.04	-7.45	3.6e-13	1.49e-11	-0.37	0.714595	--?++-	0.790152	1	0.94	0.97			19	57902529	57953307	78	14	54162	1.72	0.042589	+	1
25972	UNC50	NP_054763.2	0.91	8.91	-6.08	2.17e-09	4.51e-08	0.88	8.91	-7.17	2.35e-12	7.99e-11	-2.09	0.0363667	-+----	0.069913	1	0.78	0.94			2	99205032	99254978	69	5	54162	0.33	0.37235	+	1
83642	SELO	NP_113642.1	1.07	7.67	6.08	2.17e-09	4.51e-08	1.08	7.67	5.79	1.18e-08	1.59e-07	2.63	0.00856086	-+++++	0.0201881	1	0.78	0.99			22	50619408	50676045	156	23	54162	-0.79	0.78411	+	1
29071	C1GALT1C1	NP_689905.1	0.92	7.31	-6.08	2.18e-09	4.52e-08	0.9	7.31	-6.6	9.19e-11	2.12e-09	0.79	0.426978	-+?+--	0.535401	1	0.74	0.94
4580	MTX1	NP_942584.1	1.1	8.37	6.08	2.18e-09	4.53e-08	1.08	8.37	4.64	4.37e-06	3.14e-05	-0.45	0.656151	+-?+-+	0.741451	1	1.07	1.01			1	155158490	155203625	47	6	54162	-1.18	0.8808	+	1
23130	ATG2A	NP_055919.1	1.13	7.99	6.08	2.21e-09	4.57e-08	1.14	7.99	5.84	8.7e-09	1.22e-07	0.4	0.691705	--?++-	0.771769	1	0.85	0.96	-0.4726		11	64642004	64704722	90	9	54162	2.34	0.0096027	-	1
81559	TRIM11	NP_660215.1	1.06	7.47	6.08	2.23e-09	4.62e-08	1.07	7.47	6.21	1.04e-09	1.85e-08	1.2	0.228244	+-++++	0.324756	1	1.18	1.04			1	228561373	228614584	83	10	54162	1.09	0.13719	-	1
4627	MYH9	NP_002464.1	1.17	11.57	6.08	2.24e-09	4.63e-08	1.21	11.57	6.44	2.61e-10	5.35e-09	4.63	3.63e-06	+-?+++	2.52e-05	0.0854547	1.28	1.14	0.6277	0.4782	22	36657323	36804107	417	43	54162	0.94	0.17311	-	1
1639	DCTN1	NP_075408.1	1.11	8.51	6.08	2.24e-09	4.63e-08	1.13	8.51	6.76	3.46e-11	8.78e-10	-2.77	0.005692	------	0.0142239	1	0.63	0.88		-0.5335	2	74568281	74639214	66	6	54162	-0.92	0.82031	-	1
8634	RTCD1	NP_003720.1	0.94	7.29	-6.08	2.24e-09	4.63e-08	0.93	7.29	-6.51	1.71e-10	3.65e-09	-4.76	1.95e-06	--?---	1.49e-05	0.0457924	0.67	0.83	-0.4655		1	100711714	100778325	129	7	54162	-0.68	0.75186	+	1
28988	DBNL	NP_001014436.1	1.1	10.67	6.08	2.28e-09	4.7e-08	1.13	10.67	6.56	1.23e-10	2.7e-09	-4.41	1.04e-05	--?---	6.18e-05	0.244303	0.83	0.9	-0.4909		7	44064239	44121315	125	9	54162	-0.51	0.69639	+	1
7376	NR1H2	NP_009052.2	1.09	8.18	6.07	2.32e-09	4.78e-08	1.11	8.18	6.19	1.17e-09	2.04e-08	1.67	0.0946302	+-?++-	0.15641	1	1.1	1.01			19	50859680	50906285	72	7	54162	0.54	0.29414	+	1
8487	SIP1	NP_001009182.1	0.97	6.76	-6.07	2.34e-09	4.82e-08	0.96	6.76	-6.88	1.59e-11	4.38e-10	-3.43	0.000600387	--?---	0.00201902	1	0.8	0.92			14	39563488	39626177	166	21	54162	0.56	0.28922	+	1
9422	ZNF264	NP_003408.1	0.93	7.26	-6.07	2.37e-09	4.88e-08	0.96	7.26	-3.17	0.00158013	0.00579306	0.77	0.440283	-+?++-	0.548967	1	0.74	0.96			19	57682868	57754214	182	21	54162	-0.32	0.62497	+	1
730953	LOC730953	XP_001128891.1	1.1	7.18	6.07	2.38e-09	4.89e-08	1.1	7.18	5.56	4.14e-08	4.88e-07
79794	C12orf49	NP_079014.1	0.96	6.87	-6.07	2.38e-09	4.89e-08	0.95	6.87	-5.93	5.31e-09	7.9e-08	-5.92	3.13e-09	--?---	7.55e-08	7.38e-05	0.66	0.84	-0.6022	-0.518	12	117131289	117195868	170	27	54162	-1.24	0.89179	-	1
9968	MED12	NP_005111.1	1.08	7.41	6.07	2.4e-09	4.91e-08	1.12	7.41	7.71	5.75e-14	2.79e-12	6.13	8.97e-10	++++++	2.8e-08	2.11e-05	1.22	1.12	0.6288	0.4574
80851	SH3BP5L	NP_085148.1	1.1	8.05	6.06	2.44e-09	4.98e-08	1.09	8.05	5.12	4.13e-07	3.79e-06	0.08	0.93567	--+-++	0.955776	1	0.64	0.94			1	249084645	249140154	78	8	54162	0.68	0.24732	-	1	Yes
10001	MED6	NP_005457.2	0.93	8.7	-6.06	2.45e-09	5e-08	0.92	8.7	-6.38	3.74e-10	7.39e-09	-1.42	0.155509	--?-+-	0.236898	1	0.84	0.93			14	71030306	71087401	194	15	54162	-0.05	0.52163	-	1
80198	MUS81	NP_079404.2	1.06	7.69	6.06	2.5e-09	5.09e-08	1.06	7.69	5.91	5.86e-09	8.59e-08	1.83	0.0666936	++++++	0.116581	1	1.09	1.04			11	65607872	65653914	71	9	54162	1.08	0.13992	+	1
23166	STAB1	NP_055951.2	1.08	7.02	6.06	2.51e-09	5.11e-08	1.05	7.02	3.8	0.000157334	0.000769625	6.34	2.23e-10	++?+++	9.1e-09	5.26e-06	1.46	1.23			3	52509354	52578512	103	15	54162	-0.58	0.71738	+	1
55762	ZNF701	NP_060730.1	0.95	6.89	-6.06	2.55e-09	5.18e-08	0.94	6.89	-7.41	4.7e-13	1.89e-11	-0.13	0.895106	++?--+	0.927095	1	1.1	1.03			19	53053526	53110427	215	27	54162	1.08	0.14085	+	1
221	ALDH3B1	NP_000685.1	1.12	8.33	6.05	2.59e-09	5.25e-08	1.12	8.33	5.35	1.26e-07	1.31e-06	2.98	0.00289992	++?+++	0.0079334	1	1.19	1.07			11	67756048	67816743	109	14	54162	-0.15	0.56065	+	1
64601	VPS16	NP_072097.2	1.1	8.54	6.05	2.6e-09	5.27e-08	1.11	8.54	6.37	3.8e-10	7.49e-09	-0.71	0.475705	--?+-?	0.582319	1	0.94	0.98			20	2801373	2867378	111	10	54162	0.03	0.48877	+	1
10262	SF3B4	NP_005841.1	1.11	9.66	6.05	2.6e-09	5.27e-08	1.14	9.66	6.88	1.55e-11	4.29e-10	2.07	0.0383153	--?+++	0.0730669	1	1.11	1.02			1	149875209	149921449	47	4	54162	2	0.022507	-	1
4122	MAN2A2	NP_006113.2	1.09	7.79	6.05	2.61e-09	5.29e-08	1.05	7.79	3.21	0.00141434	0.00526122	3.26	0.00109761	++?+++	0.00339915	1	1.21	1.1			15	91427420	91485815	146	18	54162	-0.7	0.75702	+	1
567	B2M	NP_004039.1	0.83	12.03	-6.05	2.62e-09	5.3e-08	0.77	12.72	-7.3	9.65e-13	3.6e-11	4.7	2.65e-06	++++++	1.92e-05	0.0624081	1.97	1.33			15	44983685	45030357	83	10	54162	-0.23	0.59075	+	1
79017	C7orf24	NP_076956.1	0.94	7.07	-6.04	2.78e-09	5.63e-08	0.93	7.07	-7.06	4.79e-12	1.51e-10	-5.26	1.41e-07	------	1.65e-06	0.00332779	0.57	0.8	-0.6355	-0.485	7	30516237	30564457	112	17	54162	-0.3	0.61839	-	1
64965	MRPS9	NP_872578.1	0.93	7.59	-6.04	2.85e-09	5.76e-08	0.96	7.59	-3.2	0.00143424	0.00532159	-5.43	5.7e-08	------	7.96e-07	0.00134135	0.61	0.86		-0.4608	2	105634483	105736418	278	10	54162	0.12	0.45202	+	1	Yes
8427	ZNF282	NP_003566.1	1.06	7.28	6.03	2.94e-09	5.93e-08	1.08	7.28	6.49	1.86e-10	3.93e-09	0	0.999423	?-?+++	0.999635	1	0.93	1			7	148872560	148943339	173	23	54162	1.05	0.1458	+	1
10403	NDC80	NP_006092.1	0.97	6.72	-6.03	2.98e-09	6.01e-08	0.97	6.72	-5.96	4.52e-09	6.88e-08	4.06	4.91e-05	???++?	0.000233363	1	1.17	1.14			18	2551510	2636634	285	24	54162	-1.23	0.89153	+	1
25957	C6orf111	NP_116259.1	0.89	8.08	-6.03	2.99e-09	6.01e-08	0.85	8.08	-7.13	3.06e-12	1.01e-10	3.57	0.000359616	++-+++	0.00129914	1	2.84	1.28			6	99826534	99893263	153	16	54162	0.86	0.19491	-	1
22838	RNF44	NP_055716.1	1.09	8.49	6.03	2.99e-09	6.01e-08	1.08	8.49	4.86	1.55e-06	1.24e-05	-3.59	0.000329364	--+---	0.00120397	1	0.76	0.93			5	175933700	175985026	104	17	54162	0.03	0.48933	-	1
90592	ZNF700	NP_653167.1	0.9	8.08	-6.03	3.01e-09	6.05e-08	0.88	8.08	-6.51	1.64e-10	3.53e-09	-0.27	0.786524	-+?--+	0.84603	1	0.91	0.99			19	12015883	12081588	158	10	54162	-0.59	0.72112	+	1
389787	LOC389787	XP_497072.2	0.76	9.1	-6.02	3.05e-09	6.12e-08	0.74	9.1	-6.04	2.77e-09	4.43e-08	5.79	6.93e-09	???++?	1.42e-07	0.000163122	1.22	1.19
221154	EFHA1	NP_689939.1	0.87	7.99	-6.02	3.14e-09	6.29e-08	0.83	7.99	-7.34	7.32e-13	2.8e-11	-2.22	0.0264276	++?---	0.0532856	1	0.84	1		-0.4537	13	22046828	22198355	364	21	54162	0.25	0.40238	-	1
908	CCT6A	NP_001009186.1	0.93	7.35	-6.02	3.18e-09	6.36e-08	0.93	7.35	-5.95	4.72e-09	7.14e-08	-2.14	0.0324149	-+?---	0.0633911	1	0.67	0.89			7	56099378	56151682	128	17	54162	0.26	0.39798	+	1	Yes
3455	IFNAR2	NP_997468.1	1.12	9.23	6.02	3.2e-09	6.4e-08	1.14	9.23	6.2	1.09e-09	1.91e-08	2.97	0.00293658	++?++-	0.00801505	1	1.79	1.16			21	34582231	34656831	192	23	54162	0.69	0.24399	+	1
80315	CPEB4	NP_085130.1	1.14	7.57	6.02	3.2e-09	6.41e-08	1.07	7.57	2.7	0.00721674	0.0217179	-0.67	0.500241	++?---	0.604895	1	2.59	1.22			5	173295331	173407313	283	20	54162	-0.04	0.51726	+	1
8624	PSMG1	NP_982257.1	0.94	7.07	-6.02	3.22e-09	6.42e-08	0.92	7.07	-7.19	2.09e-12	7.22e-11	-5.57	2.58e-08	--?--+	4.15e-07	0.000607455	0.51	0.78	-0.6506	-0.541	21	40429076	40575440	423	39	54162	-0.03	0.5107	-	1
162073	LOC162073	NP_001030013.1	1.14	8.11	6.02	3.22e-09	6.43e-08	1.15	8.11	5.7	1.98e-08	2.51e-07	2.88	0.00400618	++???+	0.0105055	1	1.97	1.34	0.7094	0.5308	16	19105254	19152952	83	13	54162	0.45	0.32772	+	1
2309	FOXO3	NP_963853.1	1.2	11.08	6.01	3.27e-09	6.51e-08	1.28	11.08	7.08	4.24e-12	1.35e-10	2.49	0.0127521	++-++-	0.0285007	1	0.8	1.01	0.4304		6	108861026	109025972	248	24	54162	1.6	0.05524	+	1
64072	CDH23	NP_071407.3	1.1	7.45	6.01	3.31e-09	6.6e-08	1.12	7.45	6.43	2.69e-10	5.5e-09	6.73	1.67e-11	???+++	1.15e-09	3.93e-07	1.35	1.24	-0.6152	0.522	10	73136691	73595704	1303	149	54162	0.53	0.29759	+	1
86	ACTL6A	NP_817126.1	0.92	7.98	-6.01	3.32e-09	6.61e-08	0.91	7.98	-6.06	2.45e-09	3.98e-08	5.01	5.44e-07	++?++-	5.08e-06	0.0127963	1.35	1.19	0.6795	0.5774	3	179260708	179326193	77	7	54162	-1.01	0.84359	+	1
89941	RHOT2	NP_620124.1	1.08	8.12	6.01	3.32e-09	6.61e-08	1.12	8.12	7.19	2.12e-12	7.32e-11	-2.55	0.0108161	+----+	0.0247115	1	0.85	0.96			16	698083	744174	117	8	54162	1.38	0.084023	+	1
11000	SLC27A3	NP_077306.1	1.1	8.6	6.01	3.37e-09	6.71e-08	1.12	8.6	6.15	1.46e-09	2.49e-08	0.82	0.40996	+--+++	0.518733	1	1.37	1.03	-0.4681	-0.4331	1	153726830	153772633	62	14	54162	0.16	0.43826	+	1	Yes
5986	RFNG	XP_001132711.1	1.11	8.73	6.01	3.41e-09	6.77e-08	1.17	8.73	8.03	5.59e-15	3.63e-13	4.44	9.11e-06	++?+++	5.53e-05	0.214389	1.1	1.06			17	79985778	80029650	80	9	54162	-1.34	0.90977	-	1
9782	MATR3	NP_954659.1	0.8	8.84	-6	3.46e-09	6.85e-08	0.76	8.84	-6.77	3.25e-11	8.3e-10	0.27	0.790213	++?+-?	0.84895	1	1.35	1.07			5	138589441	138687366	71	8	54162	0.16	0.43664	+	1
285908	LOC285908	NP_859073.2	1.06	7.23	6	3.51e-09	6.95e-08	1.07	7.23	5.61	3.09e-08	3.76e-07	3.98	6.82e-05	???++?	0.000310077	1	1.26	1.16
867	CBL	NP_005179.2	1.1	7.93	6	3.53e-09	6.99e-08	1.07	7.93	3.76	0.000191085	0.000916402	5.03	5.02e-07	++?++-	4.74e-06	0.011805	1.4	1.12			11	119056986	119198859	135	12	54162	-0.72	0.76293	+	1
51406	NOL7	NP_057251.2	0.92	9.53	-6	3.55e-09	7.02e-08	0.9	9.53	-6.36	4.17e-10	8.09e-09	-2.62	0.0088105	++----	0.0206897	1	0.88	0.97			6	13592531	13653089	75	13	54162	-0.32	0.62578	+	1
3840	KPNA4	NP_002259.1	0.89	8.54	-6	3.59e-09	7.09e-08	0.85	8.54	-7.67	7.34e-14	3.49e-12	-1.32	0.18814	-+-+--	0.277221	1	0.79	0.94			3	160192783	160303376	175	17	54162	1.7	0.044805	-	1
23001	WDFY3	NP_848698.1	1.08	7.33	5.99	3.73e-09	7.36e-08	1.04	7.33	2.5	0.0125274	0.0349269	3.12	0.0017942	-+?+++	0.00521398	1	0.77	1		0.4757	4	85570690	85907544	290	19	54162	-0.06	0.52335	-	1
29992	PILRA	NP_840056.1	1.16	9.75	5.99	3.82e-09	7.51e-08	1.11	8.82	4	7.03e-05	0.000374963	6.17	6.65e-10	++?+++	2.19e-08	1.56e-05	1.16	1.12	0.6127	0.5146	7	99951068	100017722	80	7	54162	1.11	0.13288	+	1
51693	TRAPPC2L	NP_057293.1	0.91	8.42	-5.98	3.87e-09	7.62e-08	0.91	8.42	-5.18	3.09e-07	2.93e-06	-6.26	3.89e-10	--?---	1.41e-08	9.16e-06	0.49	0.75	-0.7017	-0.5879	16	88903465	88949086	146	18	54162	-0.85	0.80261	+	1
51726	DNAJB11	NP_057390.1	0.92	8.55	-5.98	3.92e-09	7.7e-08	0.91	8.55	-6.16	1.4e-09	2.42e-08	-1.56	0.118384	-+?---	0.189121	1	0.7	0.91			3	186268467	186323589	114	9	54162	-0.34	0.63355	+	1
8897	MTMR3	NP_066576.1	1.07	7.28	5.98	3.93e-09	7.72e-08	1.1	7.69	4.88	1.35e-06	1.09e-05	3.7	0.000215922	+-?+++	0.000837839	1	1.28	1.07	0.6594	0.5246	22	30259149	30446857	377	23	54162	0.46	0.32154	+	1
55297	CCDC91	NP_060788.3	0.94	6.93	-5.98	3.96e-09	7.77e-08	0.92	6.93	-6.5	1.78e-10	3.77e-09	-4.08	4.49e-05	-+?---	0.000216419	1	0.51	0.82	-0.5899		12	28323360	28723099	946	17	54162	-0.24	0.59611	+	1
642233	LOC642233	XP_947888.1	0.95	6.86	-5.98	3.99e-09	7.83e-08	0.95	6.86	-5.72	1.71e-08	2.21e-07
10463	SLC30A9	NP_006336.3	0.91	7.43	-5.98	4e-09	7.83e-08	0.87	7.43	-7.67	7.33e-14	3.49e-12	-4.59	4.39e-06	--?---	2.96e-05	0.103237	0.74	0.85	-0.6334	-0.4957	4	41972516	42109551	424	11	54162	-0.12	0.54782	+	1
119392	C10orf78	NP_660290.3	0.95	6.94	-5.98	4.03e-09	7.89e-08	0.93	6.94	-6.75	3.69e-11	9.32e-10	-1.99	0.0463389	-+?---	0.0857669	1	0.76	0.92			10	105860059	105906143	68	6	54162	-1.11	0.8674	+	1
22993	KIAA0194	XP_945302.1	1.07	7.58	5.98	4.03e-09	7.89e-08	1.07	7.58	5.7	1.94e-08	2.46e-07	0.24	0.810316	--?+++	0.864304	1	0.82	0.96			5	149360169	149452706	177	14	54162	0.13	0.44661	+	1
94120	SYTL3	NP_001009991.2	1.11	8.4	5.98	4.07e-09	7.94e-08	1.1	8.4	4.8	2.04e-06	1.59e-05	-0.76	0.444635	?+?---	0.552889	1	1.08	0.99			6	159045931	159205908	487	54	54162	-1.32	0.90674	+	1
26873	OPLAH	NP_060040.1	1.1	7.23	5.97	4.11e-09	8.02e-08	1.06	7.23	3.44	0.000627339	0.00258244	-0.04	0.965616	+-?--+	0.976449	1	1.15	1.02			8	145086167	145135584	37	4	54162	1	0.15945	-	1
84693	MCEE	NP_115990.2	0.92	7.29	-5.97	4.14e-09	8.08e-08	0.88	7.29	-7.88	1.75e-14	9.95e-13	-4.7	2.66e-06	------	1.93e-05	0.062705	0.8	0.9	-0.4733	-0.4184	2	71316806	71377394	176	19	54162	1.86	0.031774	-	1
83939	EIF2A	NP_114414.2	0.88	7.69	-5.97	4.15e-09	8.08e-08	0.84	7.69	-6.87	1.72e-11	4.7e-10	-0.87	0.382759	++?+--	0.492014	1	0.91	0.99			3	150244465	150323803	214	25	54162	-0.3	0.61706	+	1	Yes
56271	BEXL1	XP_941560.1	0.91	7.92	-5.97	4.18e-09	8.12e-08	0.94	7.25	-4.99	8e-07	6.82e-06	-5.58	2.43e-08	--?---	3.96e-07	0.00057189	0.54	0.8	-0.6452	-0.5557
79088	ZNF426	NP_077011.1	0.96	6.88	-5.97	4.23e-09	8.23e-08	0.96	6.88	-5.37	1.18e-07	1.23e-06	1.5	0.133106	-++++-	0.208401	1	1.16	1.03			19	9618667	9669638	209	3	54162	2.35	0.0094237	-	1
113878	DTX2	NP_065943.1	1.11	8.75	5.97	4.27e-09	8.29e-08	1.15	8.75	6.91	1.34e-11	3.76e-10	3.94	8.1e-05	???++-	0.000359298	1	1.15	1.04	0.6344	0.5363	7	76070972	76155312	89	7	54162	0.66	0.25469	+	1
6636	SNRPF	NP_003086.1	0.88	8.76	-5.97	4.27e-09	8.29e-08	0.87	8.76	-5.87	7.53e-09	1.07e-07	-3.53	0.000408442	--?---	0.00145066	1	0.75	0.89			12	96232709	96280238	158	19	54162	0.97	0.1652	+	1	Yes
29888	STRN4	NP_001034966.1	1.08	7.52	5.97	4.28e-09	8.29e-08	1.1	7.52	6.64	7.23e-11	1.71e-09	0.43	0.668663	+-?++-	0.752229	1	1.11	1.01			19	47202768	47270251	136	19	54162	2.55	0.0054351	-	1
29123	ANKRD11	NP_037407.4	1.09	8.44	5.96	4.34e-09	8.41e-08	1.05	8.44	3.23	0.00128971	0.00485102	2.62	0.00879821	++?++-	0.0206712	1	1.86	1.15			16	89314029	89576969	465	28	54162	1.03	0.15143	-	1
80347	COASY	NP_001035997.1	1.08	8.67	5.96	4.4e-09	8.51e-08	1.07	7.26	6.35	4.36e-10	8.42e-09	3.5	0.000462169	++?+++	0.00160989	1	1.1	1.05		0.416	17	40693485	40738299	77	7	54162	0.3	0.38221	+	1
146705	C17orf56	NP_653280.1	1.05	7.15	5.96	4.46e-09	8.62e-08	1.07	7.15	7.18	2.19e-12	7.54e-11	4.88	1.07e-06	+-++++	8.93e-06	0.0250797	1.56	1.14		0.5063	17	79182072	79232891	160	26	54162	0.77	0.22184	-	1
80345	ZSCAN16	NP_079507.1	0.94	7.36	-5.96	4.5e-09	8.68e-08	0.92	7.36	-7.05	5.3e-12	1.65e-10	0.86	0.38986	++++--	0.498853	1	1.22	1.04			6	28072334	28117864	132	10	54162	1.14	0.12686	+	1
11126	CD160	NP_008984.1	0.89	7.28	-5.95	4.6e-09	8.85e-08	0.89	7.28	-5.09	4.93e-07	4.45e-06	-3.83	0.000130585	???---	0.000542587	1	0.96	0.97			1	145675798	145735639	55	7	54162	1.38	0.084195	-	1
651894	LOC651894	XP_946248.1	0.88	12.35	-5.95	4.63e-09	8.91e-08	0.92	12.35	-3.24	0.00128494	0.00483465
8821	INPP4B	NP_003857.1	0.94	7.13	-5.95	4.75e-09	9.13e-08	0.96	7.13	-3.89	0.000113004	0.000572084	-0.06	0.952947	+++---	0.967503	1	1.59	1.1			4	142929181	143787604	2106	84	54162	-0.23	0.5914	-	1
10509	SEMA4B	NP_945119.1	1.13	8.8	5.95	4.75e-09	9.13e-08	1.14	8.8	5.86	7.71e-09	1.09e-07	1.56	0.117749	++?-++	0.188223	1	1.18	1.07			15	90707985	90792897	258	18	54162	-0.18	0.57235	+	1
140823	C20orf52	NP_542786.1	0.89	9.04	-5.95	4.76e-09	9.14e-08	0.85	9.04	-6.87	1.68e-11	4.6e-10	0.65	0.514641	--+++-	0.618431	1	0.67	0.94			20	34267232	34308902	100	9	54162	0.19	0.42372	+	1
83706	FERMT3	NP_113659.3	1.11	10.03	5.95	4.77e-09	9.16e-08	1.14	10.03	6.64	7.31e-11	1.73e-09	6.25	3.98e-10	???+++	1.44e-08	9.37e-06	1.63	1.3	0.6062	0.4627	11	63954152	64011363	90	13	54162	0.86	0.19597	+	1
5590	PRKCZ	NP_002735.3	1.09	7.81	5.95	4.79e-09	9.17e-08	1.09	7.81	5.53	4.98e-08	5.72e-07	-4.41	1.03e-05	--?---	6.13e-05	0.242476	0.79	0.9	-0.6152	-0.5327	1	1961909	2136834	299	17	54162	-0.87	0.80748	+	1
81788	NUAK2	NP_112214.1	1.14	8.99	5.94	4.87e-09	9.33e-08	1.16	8.99	6.12	1.71e-09	2.87e-08	5.25	1.5e-07	???+++	1.73e-06	0.00353733	1.39	1.21			1	205251191	205310883	191	17	54162	-0.72	0.76316	-	1
9985	REC8	NP_005123.2	1.13	8.06	5.94	4.92e-09	9.43e-08	1.16	8.06	6.5	1.73e-10	3.7e-09	1.55	0.120394	-+?+++	0.191747	1	1.08	1.02			14	24621062	24669735	80	14	54162	-0.09	0.53531	+	1
1820	ARID3A	NP_005215.1	1.15	9.32	5.94	4.99e-09	9.54e-08	1.15	9.32	5.35	1.3e-07	1.34e-06	4.34	1.46e-05	+-?+++	8.2e-05	0.342542	1.63	1.14			19	905733	992816	208	27	54162	1.03	0.15112	+	1
22980	TCF25	NP_055787.1	1.1	9.22	5.94	5.07e-09	9.68e-08	1.11	9.22	5.9	6.39e-09	9.27e-08	-2.29	0.0220176	+----+	0.0456372	1	1.71	1.04		-0.4944	16	89919994	89997795	201	13	54162	-0.24	0.59521	+	1
219931	TPCN2	NP_620714.1	1.08	7.45	5.93	5.2e-09	9.92e-08	1.06	7.45	3.7	0.000238544	0.00111076	2.1	0.0354727	++?+++	0.0684719	1	1.21	1.07			11	68796350	68878072	228	16	54162	-0.56	0.71255	+	1
63874	ABHD4	NP_071343.2	1.07	7.29	5.93	5.3e-09	1.01e-07	1.07	7.29	5.75	1.5e-08	1.97e-07	4.09	4.23e-05	++?++-	0.00020552	0.996356	1.3	1.13	0.6506	0.5193	14	23047147	23101265	200	33	54162	0.34	0.36632	+	1
54780	NSMCE4A	NP_060085.1	0.89	8.05	-5.93	5.31e-09	1.01e-07	0.86	8.05	-7.16	2.59e-12	8.7e-11	-0.37	0.714372	-++--+	0.790017	1	0.84	0.98			10	123696603	123754743	204	14	54162	0.35	0.36346	-	1
57701	KIAA1602	NP_065992.1	1.09	7.49	5.93	5.37e-09	1.02e-07	1.12	7.49	6.68	5.88e-11	1.42e-09	3	0.00273408	?-?++-	0.00752783	1	1.12	1.03			12	50164929	50242208	164	17	54162	-0.47	0.67984	-	1
2073	ERCC5	NP_000114.2	0.93	7.9	-5.93	5.38e-09	1.02e-07	0.95	7.9	-3.6	0.000352342	0.00156045	3.8	0.000142735	++?++?	0.00058552	1	1.19	1.1		0.4757	13	103478191	103548351	158	19	54162	-0.55	0.70979	+	1
6729	SRP54	NP_003127.1	0.92	8.63	-5.93	5.39e-09	1.02e-07	0.91	8.63	-5.88	6.98e-09	1e-07	-3.65	0.000262189	--?---	0.000990101	1	0.49	0.84			14	35431901	35518773	321	17	54162	0.82	0.20475	+	1
6880	TAF9	NP_057367.1	0.97	6.75	-5.93	5.4e-09	1.03e-07	0.98	6.75	-3.62	0.000321463	0.0014437	-4.85	1.24e-06	--?--?	1.02e-05	0.0292454	0.42	0.71	-0.6162	-0.4805	5	68627551	68685840	77	8	54162	0.05	0.48043	-	1
2665	GDI2	NP_001485.2	0.86	8.96	-5.93	5.41e-09	1.03e-07	0.83	8.96	-6.38	3.58e-10	7.11e-09	0.9	0.370041	+-++-+	0.478963	1	0.93	1.01			10	5787186	5875512	207	26	54162	-0.84	0.79854	-	1
415116	PIM3	XP_943264.2	1.07	7.47	5.92	5.56e-09	1.05e-07	1.05	7.47	3.79	0.00016649	0.000810406	4.7	2.64e-06	++?+++	1.92e-05	0.062044	1.19	1.12	0.5173	0.4486	22	50334143	50377720	47	6	54162	-1.71	0.95598	+	1
5451	POU2F1	NP_002688.2	1.07	7.26	5.92	5.71e-09	1.08e-07	1.1	7.26	6.86	1.84e-11	4.98e-10	3.79	0.00015029	++++++	0.000612455	1	1.34	1.16			1	167170066	167416582	385	27	54162	0.03	0.4883	+	1
2539	G6PD	NP_000393.4	1.15	9.91	5.91	5.78e-09	1.09e-07	1.18	9.91	6.23	9.22e-10	1.65e-08	-0.74	0.460978	?-?-++	0.568044	1	0.89	0.98
8533	COPS3	NP_003644.2	0.91	9.05	-5.91	5.8e-09	1.1e-07	0.9	9.05	-6.08	2.16e-09	3.56e-08	-5.64	1.74e-08	------	3.02e-07	0.000408432	0.49	0.81	-0.5972	-0.4818	17	17129938	17204617	214	19	54162	-1.02	0.84562	-	1
10227	MFSD10	NP_001111.2	1.1	9.94	5.91	5.8e-09	1.1e-07	1.14	9.94	7.29	1.08e-12	3.98e-11	3.03	0.00246588	+-?+++	0.00689016	1	1.5	1.1			4	2912288	2956586	89	15	54162	0.47	0.31935	-	1	Yes
83463	MXD3	NP_112590.1	1.07	7.25	5.91	5.83e-09	1.1e-07	1.05	7.25	3.64	0.000292523	0.00132656	2.37	0.0180188	???+++	0.0384042	1	1.11	1.06			5	176712501	176761096	83	17	54162	0.21	0.416	-	1
226	ALDOA	NP_908932.1	1.13	10.83	5.91	5.88e-09	1.11e-07	1.15	10.83	5.88	7.18e-09	1.03e-07	-2.58	0.00987288	------	0.0228225	1	0.7	0.87			16	30044411	30101741	54	6	54162	2.17	0.014963	+	1
25996	REXO2	NP_056338.1	0.9	8.44	-5.91	5.91e-09	1.11e-07	0.9	8.44	-5.49	6.01e-08	6.78e-07	1.33	0.184178	-+?++-	0.272287	1	0.69	0.93			11	114290108	114341001	155	17	54162	0.99	0.16135	+	1
2771	GNAI2	NP_002061.1	1.11	11.35	5.91	5.95e-09	1.12e-07	1.12	11.35	5.43	8.56e-08	9.25e-07	5.11	3.18e-07	+-?+++	3.22e-06	0.0074719	1.23	1.1			3	50244120	50316786	62	12	54162	-1.01	0.84314	+	1
283991	FAM100B	NP_872371.1	1.1	8.21	5.91	5.98e-09	1.12e-07	1.08	8.21	4.42	1.18e-05	7.59e-05	6.03	1.6e-09	++++++	4.44e-08	3.76e-05	1.45	1.2	0.6006	0.4775	17	74241286	74287379	130	15	54162	0.06	0.47448	+	1
10920	COPS8	NP_006701.1	0.95	6.97	-5.91	6.07e-09	1.14e-07	0.9	7.26	-6.64	7.5e-11	1.77e-09	-6.86	6.86e-12	------	5.62e-10	1.61e-07	0.61	0.82	-0.6537	-0.5284	2	237973870	238027489	96	8	54162	0.87	0.19115	+	1
114782	KIAA1881	XP_001130790.1	1.1	7.24	5.9	6.1e-09	1.14e-07	1.11	7.24	5.86	7.67e-09	1.09e-07
5351	PLOD1	NP_000293.2	1.13	8.9	5.9	6.13e-09	1.15e-07	1.12	8.9	4.71	3.09e-06	2.31e-05	5.42	5.96e-08	++++++	8.24e-07	0.00140133	1.5	1.17	0.6356	0.4947	1	11974724	12055599	206	22	54162	0.63	0.26493	+	1	Yes
79671	NLRX1	NP_733840.1	1.11	7.95	5.9	6.14e-09	1.15e-07	1.1	7.95	4.84	1.68e-06	1.33e-05	1.58	0.114312	??+++-	0.183576	1	1.07	1.02	-0.4716		11	119019036	119074725	55	9	54162	-1.49	0.93225	+	1
10465	PPIH	NP_006338.1	0.93	7.76	-5.9	6.15e-09	1.15e-07	0.95	7.76	-4.19	3.29e-05	0.00018896	-5.82	5.72e-09	------	1.22e-07	0.000134528	0.61	0.85	-0.5247	-0.4618	1	43103706	43162429	99	14	54162	1.25	0.10562	+	1
65123	INTS3	NP_075391.3	1.1	8.56	5.9	6.19e-09	1.16e-07	1.12	8.56	6.32	5.18e-10	9.79e-09	0.56	0.574427	---+++	0.671949	1	1.06	1			1	153680526	153766555	107	12	54162	0.07	0.47325	+	1
25798	BRI3	NP_056194.1	1.12	10.3	5.9	6.19e-09	1.16e-07	1.05	10.3	2.32	0.0205716	0.0531946	5.43	5.49e-08	++?+++	7.71e-07	0.00129212	1.3	1.14			7	97890972	97972972	174	8	54162	-0.29	0.61419	+	1
6311	ATXN2	NP_002964.2	1.08	9.12	5.9	6.19e-09	1.16e-07	1.11	9.12	7.21	1.8e-12	6.33e-11	-1.97	0.0494067	+-?--+	0.0904068	1	1.04	1			12	111870018	112057480	134	9	54162	1.4	0.08132	-	1
27250	PDCD4	NP_663314.1	0.93	7.39	-5.9	6.29e-09	1.17e-07	0.92	7.39	-5.51	5.39e-08	6.15e-07	-0.09	0.927473	--?++-	0.950043	1	0.94	0.97			10	112611553	112679764	118	17	54162	2.74	0.0030827	+	1	Yes
10694	CCT8	NP_006576.2	0.9	9.34	-5.9	6.32e-09	1.18e-07	0.92	9.34	-4.54	6.89e-06	4.71e-05	-1.15	0.248788	--?+--	0.348099	1	0.59	0.89		0.5294	21	30408647	30466010	80	11	54162	-0.28	0.60837	-	1	Yes
197258	FUK	NP_659496.2	1.07	7.44	5.9	6.33e-09	1.18e-07	1.08	7.44	5.84	9.04e-09	1.26e-07	2.38	0.0171959	++?+++	0.0368137	1	1.09	1.04		0.4429	16	70468498	70534177	41	7	54162	1.23	0.10852	+	1
199704	ZNF585A	NP_689868.1	0.96	6.86	-5.9	6.39e-09	1.19e-07	0.94	6.86	-7.5	2.55e-13	1.09e-11	1.62	0.105916	++?-+-	0.171983	1	1.57	1.12			19	37618340	37683643	121	11	54162	-0.56	0.7133	-	1
7431	VIM	NP_003371.2	1.14	12.3	5.89	6.55e-09	1.22e-07	1.1	12.3	3.69	0.000244822	0.00113535	5.59	2.34e-08	+-?+++	3.83e-07	0.000549856	3.42	1.57	0.6094	0.5125	10	17249934	17299592	121	16	54162	-1.75	0.95975	+	1	Yes
6201	RPS7	NP_001002.1	0.96	6.89	-5.89	6.55e-09	1.22e-07	0.95	6.89	-5.99	3.81e-09	5.9e-08	1.95	0.0508702	-+?+++	0.0927098	1	1.09	1.01			2	3602853	3648509	149	22	54162	-0.69	0.75477	+	1
26137	ZBTB20	NP_056457.2	1.08	7.75	5.89	6.58e-09	1.22e-07	1.09	7.75	6.28	6.61e-10	1.22e-08	3.97	7.33e-05	++?+++	0.000329578	1	2.99	1.4	0.6472	0.5529	3	114013348	114886132	1402	93	54162	0.35	0.36331	-	1
2896	GRN	NP_002078.1	1.16	9.16	5.89	6.59e-09	1.22e-07	1.21	10.22	6.01	3.33e-09	5.23e-08	3.95	7.8e-05	-+-+++	0.000347418	1	0.86	1.03		0.4403	17	42402491	42450474	62	13	54162	1.69	0.045532	+	1		Yes
8449	DHX16	NP_003578.1	1.08	8.75	5.89	6.76e-09	1.25e-07	1.08	8.75	5.47	6.92e-08	7.64e-07	2.54	0.0111821	--++-+	0.0254511	1	0.82	1.01			6	30600896	30660830	150	22	54162	1.9	0.029028	-	1
7086	TKT	NP_001055.1	1.14	11.57	5.89	6.78e-09	1.25e-07	1.11	11.57	4.22	2.87e-05	0.000166939	3.59	0.00032929	-+++++	0.00120388	1	0.77	1.03			3	53238723	53310130	255	15	54162	-0.8	0.78898	-	1
79786	C16orf44	NP_079007.2	1.06	7.62	5.88	6.86e-09	1.27e-07	1.05	7.62	4.68	3.65e-06	2.67e-05	4.77	1.8e-06	++?+++	1.39e-05	0.0422972	1.21	1.1	0.4884	0.4622	16	84662131	84721187	226	29	54162	1.08	0.14078	+	1
83478	ARHGAP24	NP_001020787.2	1.08	7.22	5.88	6.87e-09	1.27e-07	0.98	6.8	-2.83	0.00489178	0.0154995	1.6	0.108789	++?+--	0.175979	1	1.26	1.08			4	86048860	86943823	2680	85	54162	0.08	0.46899	+	1	Yes
9749	PHACTR2	NP_001093634.1	1.07	7.74	5.88	7.14e-09	1.32e-07	1.09	7.74	6.15	1.47e-09	2.51e-08	2.9	0.00375362	+-?++-	0.00992724	1	1.26	1.06			6	143909317	144172322	689	52	54162	0.39	0.34647	+	1
8535	CBX4	NP_003646.2	1.07	7.99	5.88	7.15e-09	1.32e-07	1.04	7.99	3.55	0.000424153	0.00183815	-3	0.00267215	-+?---	0.00738584	1	0.9	0.98		-0.4691	17	77786955	77833222	89	17	54162	0.96	0.16906	-	1
10235	RASGRP2	NP_722541.1	1.08	9.11	5.88	7.22e-09	1.33e-07	1.09	9.11	5.85	8.29e-09	1.17e-07	2.11	0.0351291	++?+-+	0.0678989	1	1.27	1.07			11	64474383	64532928	58	5	54162	-0.94	0.82591	-	1	Yes
1109	AKR1C4	NP_001809.2	0.95	6.87	-5.87	7.36e-09	1.35e-07	0.95	6.87	-5.72	1.72e-08	2.22e-07	-1.53	0.126623	???--+	0.200015	1	0.94	0.99			10	5218798	5280910	330	18	54162	-0.37	0.64492	+	1
9121	SLC16A5	NP_004686.1	1.12	8.42	5.87	7.37e-09	1.35e-07	1.08	7.21	5.83	9.32e-09	1.29e-07	0.22	0.827108	?-?+-+	0.87745	1	0.85	0.99		-0.443	17	73063822	73122257	194	23	54162	3.63	0.00014039	+	1
7454	WAS	NP_000368.1	1.14	12.09	5.87	7.58e-09	1.39e-07	1.16	12.09	6.04	2.83e-09	4.5e-08	4.92	8.67e-07	-++++-	7.49e-06	0.02039	1.42	1.1
3188	HNRPH2	NP_062543.1	0.92	7.69	-5.87	7.6e-09	1.39e-07	0.91	7.69	-5.87	7.52e-09	1.07e-07	-4.99	5.97e-07	???--?	5.47e-06	0.0140579	0.9	0.92		-0.44
54530	C1orf218	NP_061922.1	1.11	8.38	5.86	7.7e-09	1.41e-07	1.08	8.38	3.74	0.000205152	0.000976864	0.87	0.381908	??++-?	0.491323	1	1.31	1.09
1201	CLN3	NP_001035897.1	1.08	7.9	5.86	7.71e-09	1.41e-07	1.1	7.9	6.49	1.89e-10	3.98e-09	2.22	0.0264975	-+?+++	0.0533989	1	0.8	0.99			16	28468600	28525897	45	5	54162	0.43	0.33434	-	1
221120	ALKBH3	NP_631917.1	0.94	7.29	-5.86	7.72e-09	1.41e-07	0.95	7.29	-4.66	3.94e-06	2.85e-05	-4.3	1.73e-05	-----+	9.53e-05	0.407267	0.61	0.87			11	43882357	43961825	265	26	54162	-0.76	0.77679	+	1
51547	SIRT7	NP_057622.1	1.06	7.5	5.86	7.84e-09	1.43e-07	1.05	7.5	4.15	3.84e-05	0.00021748	4.07	4.63e-05	-+?+++	0.000221911	1	1.17	1.06		0.487
9869	SETDB1	NP_036564.2	1.07	8.05	5.86	7.98e-09	1.46e-07	1.1	8.05	6.65	6.8e-11	1.62e-09	4.08	4.58e-05	--++++	0.000219663	1	1.13	1.03			1	150878815	150957389	129	11	54162	-0.59	0.72392	+	1
7156	TOP3A	NP_004609.1	1.1	8.21	5.86	8.04e-09	1.47e-07	1.13	8.21	6.44	2.61e-10	5.35e-09	0.01	0.99552	--?-+-	0.996876	1	0.93	0.98			17	18157235	18238321	152	11	54162	0.93	0.1773	-	1
9051	PSTPIP1	NP_003969.2	1.1	8.53	5.85	8.15e-09	1.48e-07	1.13	8.53	6.55	1.27e-10	2.78e-09	3.64	0.00027191	??++++	0.00102173	1	1.21	1.1			15	77267021	77349673	136	21	54162	-0.95	0.82859	+	1
642788	LOC642788	XP_937181.1	1.11	7.37	5.85	8.17e-09	1.49e-07	1.13	7.37	5.9	6.38e-09	9.27e-08
641693	LOC641693	XP_930976.1	1.1	7.17	5.85	8.47e-09	1.54e-07	1.08	7.17	4.3	2.04e-05	0.000123224
4150	MAZ	NP_001036004.1	1.06	7.3	5.85	8.53e-09	1.55e-07	1.04	7.3	3.65	0.000283653	0.001292	-2.99	0.00279717	--?--+	0.00768715	1	0.83	0.94	-0.6467	-0.5436	16	29797417	29842504	22	3	54162	0.42	0.33664	+	1
5828	PXMP3	NP_000309.1	0.9	7.3	-5.84	8.61e-09	1.56e-07	0.87	7.3	-7	7.28e-12	2.21e-10	1.27	0.205738	++?-+-	0.298349	1	1.08	1.03			8	77872494	77933280	150	18	54162	0.12	0.45122	-	1
9489	PGS1	NP_077733.3	1.12	9.08	5.84	8.7e-09	1.58e-07	1.07	9.08	3.27	0.00113928	0.00435648	3.65	0.00025752	++?++-	0.000975912	1	1.09	1.04		0.4611	17	76354705	76440740	331	21	54162	1.01	0.15537	+	1
6050	RNH1	NP_976319.1	1.08	7.59	5.84	8.71e-09	1.58e-07	1.12	8.22	6.22	9.88e-10	1.76e-08	-0.22	0.828304	++?--+	0.878402	1	1.09	1.02			11	474512	527283	177	14	54162	-1.54	0.93819	-	1
5298	PI4KB	NP_002642.1	1.06	8.06	5.84	8.77e-09	1.59e-07	1.08	8.06	6.72	4.4e-11	1.09e-09	3.47	0.000518411	+-++++	0.00177894	1	1.36	1.09			1	151244273	151320191	58	8	54162	-0.58	0.71849	-	1
9698	PUM1	NP_001018494.1	1.1	9.6	5.84	8.81e-09	1.59e-07	1.15	9.6	7.66	8.37e-14	3.94e-12	0.1	0.919772	-+?++-	0.944622	1	0.78	0.96			1	31384353	31558838	295	15	54162	0.36	0.35916	-	1
1880	EBI2	NP_004942.1	0.87	7.75	-5.84	8.84e-09	1.6e-07	0.86	7.75	-6	3.54e-09	5.52e-08	4.55	5.34e-06	?+?++-	3.5e-05	0.125713	1.43	1.23			13	99926789	99979749	111	21	54162	-0.87	0.80877	-	1
55552	HSZFP36	NP_001073962.1	0.95	6.86	-5.84	8.96e-09	1.62e-07	0.94	6.86	-6.22	9.57e-10	1.71e-08	1.25	0.212106	++?++-	0.305757	1	1.09	1.03			19	11812080	11869824	124	13	54162	0.55	0.29242	-	1
10190	TXNDC9	NP_005774.2	0.94	6.87	-5.84	8.98e-09	1.62e-07	0.92	6.87	-6.65	6.73e-11	1.61e-09	-5.75	8.95e-09	--?---	1.76e-07	0.000210695	0.42	0.75	-0.6266	-0.4852	2	99915487	99977155	140	16	54162	-0.11	0.54532	-	1
728973	LOC728973		0.85	7.6	-5.84	8.99e-09	1.62e-07	0.84	7.6	-5.37	1.13e-07	1.19e-06
29088	MRPL15	NP_054894.1	0.93	7.2	-5.84	9.04e-09	1.63e-07	0.92	7.2	-5.6	3.27e-08	3.95e-07	-6.26	3.83e-10	------	1.4e-08	9.02e-06	0.46	0.77	-0.6563	-0.5374	8	55027781	55081074	84	5	54162	-1.19	0.88331	+	1
3421	IDH3G	NP_777358.1	1.1	8.81	5.83	9.3e-09	1.67e-07	1.16	8.81	8.21	1.47e-15	1.07e-13	-3.82	0.000132679	------	0.000550606	1	0.61	0.88		-0.5022
57122	NUP107	NP_065134.1	0.94	7.4	-5.83	9.33e-09	1.68e-07	0.92	7.4	-6.42	2.92e-10	5.9e-09	-0.95	0.339873	-+?-+-	0.447271	1	0.79	0.95			12	69060731	69156473	185	24	54162	-1.46	0.92748	+	1	Yes
652578	LOC652578	XP_947190.1	1.1	7.24	5.83	9.43e-09	1.69e-07	1.09	7.24	4.85	1.61e-06	1.28e-05
6811	STX5	NP_003155.2	1.08	9.67	5.82	9.67e-09	1.73e-07	1.1	9.67	6.27	7.24e-10	1.32e-08	1.1	0.272723	--?++-	0.375603	1	0.9	0.98			11	62554332	62619563	100	6	54162	1.16	0.12394	-	1
10972	TMED10	NP_006818.3	0.9	8.01	-5.82	9.69e-09	1.74e-07	0.89	8.01	-6.24	8.61e-10	1.55e-08	3.7	0.000216877	++?+++	0.000840589	1	1.53	1.17		0.4581	14	75578171	75663349	114	5	54162	-0.19	0.57408	-	1
51296	SLC15A3	NP_057666.1	1.14	9.82	5.82	9.71e-09	1.74e-07	1.19	9.82	6.68	5.62e-11	1.37e-09	6.45	1.14e-10	?+++++	5.29e-09	2.69e-06	1.79	1.26	0.6304	0.5072	11	60684555	60739257	131	19	54162	0.3	0.38059	-	1
57639	CCDC146	NP_065930.2	0.95	7	-5.82	9.88e-09	1.77e-07	0.96	7	-3.99	7.48e-05	0.000396412	2.47	0.0134326	++?++-	0.0298093	1	1.12	1.04	0.4959		7	76731934	76944534	571	29	54162	-0.26	0.60247	+	1
54940	OCIAD1	NP_060300.1	0.91	8.8	-5.82	9.95e-09	1.78e-07	0.87	8.8	-7.36	6.56e-13	2.55e-11	-5.7	1.22e-08	------	2.27e-07	0.000288197	0.57	0.83	-0.6568	-0.5483	4	48812599	48883834	86	13	54162	1.56	0.058891	+	1	Yes
275	AMT	NP_000472.2	1.07	7.29	5.81	1.02e-08	1.81e-07	1.08	7.29	6.06	2.54e-09	4.1e-08	-0.05	0.958415	+-?-++	0.971009	1	1.05	1.01	-0.5597	-0.4812	3	49434211	49480111	71	8	54162	-0.18	0.56994	-	1
114769	COP1	NP_443121.1	0.91	7.38	-5.81	1.02e-08	1.83e-07	0.87	7.38	-7.23	1.56e-12	5.56e-11	5.23	1.72e-07	-+?+++	1.93e-06	0.0040355	1.26	1.12			11	104892053	104936051	124	9	54162	-0.58	0.71784	-	1
5775	PTPN4	NP_002821.1	0.88	8	-5.81	1.03e-08	1.83e-07	0.86	8	-6.09	2.06e-09	3.4e-08	0.3	0.7611	++++--	0.826339	1	1.62	1.11			2	120497207	120762496	387	17	54162	1	0.15936	+	1
5495	PPM1B	NP_808907.1	0.85	8.45	-5.81	1.03e-08	1.83e-07	0.8	8.45	-7.39	5.48e-13	2.17e-11	4.09	4.34e-05	++?++-	0.000209851	1	1.23	1.11		0.4888	2	44375984	44491570	251	22	54162	-0.58	0.71875	+	1
29801	ZDHHC8	NP_037505.1	1.1	9.14	5.81	1.05e-08	1.87e-07	1.13	9.14	6.42	2.84e-10	5.78e-09	-3.61	0.000308028	++?--+	0.00113832	1	0.77	0.98	-0.6522	-0.5969	22	20099364	20155530	165	19	54162	-1.17	0.87937	+	1
55841	WWC3	NP_056506.2	1.09	8.05	5.81	1.05e-08	1.87e-07	1.09	8.05	5.13	4.07e-07	3.73e-06	6.51	7.29e-11	++++++	3.74e-09	1.72e-06	1.99	1.28	0.6692	0.5165
91663	MYADM	NP_001018656.1	1.2	11.65	5.81	1.06e-08	1.88e-07	1.21	11.65	5.33	1.42e-07	1.46e-06	-1.61	0.106625	--?+--	0.173051	1	0.68	0.89			19	54349611	54399689	66	11	54162	-1.61	0.94588	+	1
9332	CD163	NP_981961.1	1.13	7.88	5.81	1.07e-08	1.9e-07	1.1	7.88	4.05	5.72e-05	0.000310871	6.73	1.68e-11	-+?+++	1.15e-09	3.96e-07	2.06	1.49	0.5977	0.4788											Yes
6283	S100A12	NP_005612.1	0.76	8.88	-5.81	1.07e-08	1.9e-07	0.67	8.88	-7.65	8.42e-14	3.96e-12	5.17	2.35e-07	?+?+++	2.5e-06	0.00552948	2.04	1.66	0.4889		1	153326184	153368075	71	5	54162	-0.61	0.7289	-	1	Yes
23405	DICER1	NP_085124.2	1.11	8.28	5.8	1.09e-08	1.93e-07	0.97	7.1	-3	0.00285005	0.00967129	0.55	0.580682	+-+-++	0.67718	1	2.04	1.12			14	95532565	95643759	158	20	54162	-0.09	0.5358	-	1
998	CDC42	NP_001034891.1	0.89	8.75	-5.8	1.09e-08	1.93e-07	0.87	8.75	-6.43	2.79e-10	5.69e-09	-5.59	2.24e-08	------	3.7e-07	0.000526699	0.32	0.69	-0.6451	-0.5508	1	22359120	22439439	228	24	54162	0.42	0.33674	+	1
51227	PIGP	NP_710149.1	0.92	7.6	-5.8	1.09e-08	1.93e-07	0.9	7.6	-6.85	1.88e-11	5.07e-10	-3.41	0.000647782	--?---	0.00215866	1	0.54	0.84			21	38417664	38465458	175	15	54162	0.24	0.40332	-	1	Yes
5256	PHKA2	NP_000283.1	1.11	8.65	5.8	1.11e-08	1.96e-07	1.13	8.65	6.16	1.39e-09	2.41e-08	4.83	1.38e-06	++++++	1.11e-05	0.0323811	1.39	1.13	0.6656	0.5422
83693	HSDL1	NP_113651.3	0.97	6.78	-5.8	1.11e-08	1.96e-07	0.96	6.78	-5.88	6.93e-09	1e-07	-1.3	0.193312	-+++--	0.283192	1	0.66	0.92			16	84135744	84198800	188	31	54162	-0.98	0.83743	-	1
29082	CHMP4A	NP_054888.2	0.93	8.36	-5.8	1.11e-08	1.96e-07	0.95	8.36	-3.67	0.0002687	0.00123103	1.57	0.117274	+++++-	0.18759	1	1.23	1.05			14	24658787	24703036	80	14	54162	0.33	0.37125	-	1
349236	C9orf164	NP_872441.1	1.13	8.73	5.8	1.12e-08	1.97e-07	1.16	8.73	6.1	1.99e-09	3.3e-08	-1.84	0.066002	??+--?	0.115613	1	1.25	1.01
64386	MMP25	NP_071913.1	1.23	10.71	5.8	1.12e-08	1.98e-07	1.19	10.71	4.4	1.3e-05	8.27e-05	4.27	1.94e-05	???+++	0.000104999	0.455727	1.2	1.11			16	3076682	3130727	154	21	54162	0.12	0.45043	+	1
7094	TLN1	NP_006280.2	1.16	9.22	5.8	1.12e-08	1.98e-07	1.25	9.22	7.55	1.76e-13	7.81e-12	4.94	7.81e-07	-+++++	6.83e-06	0.0183741	1.43	1.14	0.689	0.5513	9	35677334	35752392	105	19	54162	-1.41	0.9201	-	1	Yes
55133	SRBD1	NP_060549.3	0.92	7.7	-5.79	1.15e-08	2.03e-07	0.89	7.7	-6.95	9.81e-12	2.85e-10	-1.49	0.135027	---+--	0.210884	1	0.83	0.94	-0.4727		2	45595819	45858434	686	29	54162	0.19	0.42622	-	1	Yes
8312	AXIN1	NP_851393.1	1.09	8.9	5.79	1.18e-08	2.07e-07	1.11	8.9	6.28	6.81e-10	1.25e-08	3.84	0.00012159	?++++-	0.000510074	1	1.35	1.1		0.4427	16	317440	425244	368	27	54162	1.86	0.031703	-	1
9905	SGSM2	NP_055668.2	1.12	9.42	5.79	1.18e-08	2.07e-07	1.14	9.42	5.96	4.39e-09	6.71e-08	-1.16	0.245426	+-?--+	0.344542	1	1.43	1.05			17	2220806	2304353	202	30	54162	0.44	0.33027	+	1
79145	CHCHD7	NP_001011671.1	0.94	7.63	-5.79	1.19e-08	2.08e-07	0.93	7.63	-5.48	6.28e-08	7.05e-07	-7.06	1.61e-12	--?---	1.83e-10	3.79e-08	0.57	0.8	-0.6314	-0.527	8	57104315	57151178	42	12	54162	-0.04	0.51609	+	1
51182	HSPA14	NP_057383.2	0.92	7.13	-5.79	1.19e-08	2.08e-07	0.9	7.13	-6.77	3.27e-11	8.32e-10	-3.16	0.00159093	--?---	0.00468343	1	0.63	0.87			10	14860159	14933740	87	13	54162	-0.01	0.50276	+	1
9997	SCO2	NP_005129.1	1.15	8.55	5.78	1.21e-08	2.13e-07	1.14	8.55	4.88	1.36e-06	1.1e-05	-0.52	0.59959	--++-+	0.692843	1	0.68	0.95			22	50941997	50984868	140	26	54162	0.7	0.24214	-	1
9296	ATP6V1F	NP_004222.2	1.1	10.3	5.78	1.22e-08	2.14e-07	1.09	10.3	4.44	1.07e-05	6.95e-05	-4.26	2.04e-05	------	0.000109298	0.479273	0.8	0.89	-0.648	-0.5237	7	128482857	128525903	103	12	54162	-1.37	0.91417	+	1
26030	PLEKHG3	NP_056364.1	1.11	8.3	5.78	1.24e-08	2.16e-07	1.1	8.3	4.64	4.4e-06	3.16e-05	3.79	0.000153349	++?+++	0.000622786	1	1.49	1.18			14	65151132	65233623	168	23	54162	0.53	0.29858	+	1
58190	CTDSP1	NP_067021.1	1.09	9.52	5.78	1.24e-08	2.16e-07	1.1	9.52	5.72	1.73e-08	2.23e-07	5.41	6.22e-08	++++++	8.55e-07	0.00146432	1.7	1.25		0.4496	2	219243061	219290664	58	12	54162	1.74	0.041211	+	1
1329	COX5B	NP_001853.2	0.92	10.49	-5.78	1.25e-08	2.18e-07	0.88	10.49	-7.2	1.98e-12	6.88e-11	-2.75	0.00592793	-+----	0.0147213	1	0.7	0.92		-0.4613	2	98242521	98284657	44	7	54162	-0.96	0.83108	+	1
662	BNIP1	NP_053582.1	0.97	6.81	-5.77	1.3e-08	2.27e-07	0.97	6.81	-4.49	8.76e-06	5.82e-05	-4.96	7e-07	--?---	6.24e-06	0.0164698	0.84	0.9			5	172551445	172611390	138	18	54162	-1.21	0.88744	+	1
8522	GAS7	NP_958839.1	1.12	8.19	5.77	1.32e-08	2.3e-07	1.11	8.19	4.77	2.31e-06	1.77e-05	-4	6.31e-05	--?--+	0.000290446	1	0.73	0.87		-0.4937	17	9793926	10121868	1212	164	54162	0.8	0.21174	-	1	Yes
3614	IMPDH1	NP_000874.2	1.15	9.89	5.77	1.33e-08	2.32e-07	1.16	9.89	5.72	1.72e-08	2.22e-07	4.31	1.63e-05	++++++	9.07e-05	0.384446	1.5	1.14	0.6247	0.5168	7	128012331	128070045	158	24	54162	-1.13	0.8711	-	1
8263	F8A1	NP_036283.2	1.12	8.28	5.77	1.34e-08	2.33e-07	1.17	8.28	7.13	3.11e-12	1.02e-10	-2.89	0.00383108	???--?	0.0100981	1	0.86	0.91	-0.6125	-0.5389
8694	DGAT1	NP_036211.1	1.08	7.64	5.76	1.35e-08	2.34e-07	1.07	7.64	4.93	1.09e-06	9e-06	0.77	0.441908	+-+++-	0.550484	1	1.17	1.03			8	145518246	145570582	55	5	54162	0.51	0.30499	-	1
6556	SLC11A1	NP_000569.3	1.22	10.61	5.76	1.35e-08	2.35e-07	1.17	10.61	4.16	3.68e-05	0.000208938	4.52	6.07e-06	-+?+++	3.9e-05	0.142734	1.37	1.11			2	219226752	219281617	88	19	54162	1.39	0.082406	+	1
84321	THOC3	NP_115737.1	0.94	7.12	-5.76	1.37e-08	2.37e-07	0.93	7.12	-5.4	9.6e-08	1.03e-06	-2.74	0.0061696	???--?	0.0152202	1	0.87	0.91			5	175366534	175415318	3	1	54162	-1.98	0.97616	-	1
64689	GORASP1	NP_114105.1	1.07	7.89	5.76	1.37e-08	2.38e-07	1.06	7.89	4.42	1.19e-05	7.65e-05	-0.11	0.910963	--+++-	0.938278	1	0.97	0.99			3	39118090	39169854	137	19	54162	0.17	0.43264	-	1
55603	FAM46A	NP_060103.2	1.1	9.6	5.76	1.38e-08	2.39e-07	1.12	9.6	5.77	1.3e-08	1.73e-07	5.48	4.22e-08	+-?+++	6.2e-07	0.000992276	1.53	1.25		0.4951	6	82346829	82482607	323	36	54162	-0.49	0.6865	-	1	Yes
5901	RAN	NP_006316.1	0.94	7.19	-5.76	1.39e-08	2.4e-07	0.93	7.19	-5.96	4.42e-09	6.75e-08	-5.76	8.22e-09	------	1.63e-07	0.000193439	0.62	0.79	-0.6384	-0.4639	12	131336617	131382220	130	14	54162	-0.12	0.54639	+	1
339344	LOC339344	NP_001012661.1	1.07	8.43	5.76	1.39e-08	2.41e-07	1.08	8.43	6.26	7.73e-10	1.4e-08	-0.32	0.748625	--?+-+	0.816764	1	0.81	0.95			19	46373281	46425862	157	24	54162	1.8	0.035916	-	1
8216	LZTR1	NP_006758.2	1.09	8.43	5.76	1.4e-08	2.41e-07	1.13	8.43	7.03	5.94e-12	1.85e-10	4.26	2.03e-05	++?++-	0.000109215	0.478796	1.24	1.09		0.4446	22	21316558	21373326	172	32	54162	1.3	0.097387	+	1
51187	C15orf15	NP_057388.1	0.77	7.79	-5.76	1.4e-08	2.42e-07	0.7	7.79	-6.98	8.38e-12	2.5e-10	-5.37	7.7e-08	------	1.01e-06	0.0018108	0.48	0.82			15	55453512	55509231	251	14	54162	0.48	0.3139	-	1
5579	PRKCB1	NP_002729.2	1.1	11.19	5.76	1.4e-08	2.42e-07	1.07	11.19	3.94	9.21e-05	0.000477261	-2.68	0.00726541	+-?---	0.017508	1	1.51	0.98		-0.4738	16	23827300	24251932	1177	100	54162	1.8	0.035676	+	1
1429	CRYZ	NP_001880.2	0.9	7.16	-5.76	1.41e-08	2.43e-07	0.89	7.16	-5.72	1.71e-08	2.21e-07	-0.03	0.978422	-+?++-	0.984742	1	0.67	0.9			1	75151170	75219092	188	26	54162	0.92	0.17874	-	1
85378	TUBGCP6	NP_065194.2	1.09	7.62	5.75	1.42e-08	2.45e-07	1.08	7.62	4.81	1.97e-06	1.54e-05	1.44	0.150714	+-?++-	0.230699	1	1.09	1.03			22	50636118	50703453	168	25	54162	-0.6	0.7274	-	1
55738	ARFGAP1	NP_060679.1	1.07	7.51	5.75	1.44e-08	2.47e-07	1.09	7.51	6.82	2.29e-11	6.13e-10	0	0.999586	---+++	0.999643	1	0.89	0.97			20	61884137	61941145	160	19	54162	0.17	0.43098	+	1
64170	CARD9	NP_434700.2	1.1	8.11	5.75	1.45e-08	2.49e-07	1.1	8.11	4.91	1.17e-06	9.59e-06	4.88	1.05e-06	++?+++	8.8e-06	0.0246107	1.23	1.1			9	139238408	139288133	147	15	54162	-0.05	0.52024	-	1
10559	SLC35A1	NP_006407.1	0.86	8.03	-5.75	1.45e-08	2.49e-07	0.8	8.03	-7.5	2.44e-13	1.06e-11	-4.39	1.12e-05	--?--?	6.57e-05	0.263634	0.9	0.93		-0.5176	6	88162637	88242057	245	21	54162	0.56	0.28874	+	1
23075	SWAP70	NP_055870.2	0.92	7.56	-5.75	1.47e-08	2.52e-07	0.93	7.56	-4.25	2.46e-05	0.000145829	6.12	9.37e-10	++?+++	2.9e-08	2.2e-05	1.42	1.2	0.6811	0.5699	11	9665624	9794508	343	16	54162	0.32	0.37374	+	1
55421	C17orf85	NP_061023.1	0.95	7.03	-5.75	1.47e-08	2.53e-07	0.95	7.03	-5.71	1.79e-08	2.3e-07	1.61	0.107564	+++++-	0.174273	1	1.85	1.13			17	3690042	3769545	138	21	54162	0.31	0.37753	-	1
83931	STK40	NP_114406.1	1.13	10.77	5.75	1.49e-08	2.55e-07	1.14	10.77	5.47	6.81e-08	7.56e-07	3.55	0.000389468	+-+++-	0.00139167	1	1.37	1.11			1	36785225	36871525	133	16	54162	0.81	0.20918	-	1
53635	PTOV1	NP_059128.2	1.09	9.09	5.75	1.5e-08	2.57e-07	1.14	9.09	7.93	1.16e-14	6.86e-13	2.21	0.0272853	++?++-	0.0547287	1	1.07	1.03		0.4397	19	50333667	50383999	83	14	54162	-0.22	0.5863	+	1
10588	MTHFS	NP_006432.1	0.9	8.13	-5.74	1.5e-08	2.57e-07	0.86	8.13	-7.05	5.32e-12	1.66e-10	2.62	0.00871948	???++?	0.0205128	1	1.07	1.05			15	80115889	80209627	270	21	54162	1.24	0.10761	-	1
338339	CLEC4D	NP_525126.2	0.94	6.84	-5.74	1.58e-08	2.7e-07	0.91	6.84	-7.3	1.01e-12	3.73e-11	3.82	0.000134216	?-?+++	0.000555568	1	1.11	1.06
8743	TNFSF10	NP_003801.1	0.84	9.49	-5.73	1.6e-08	2.73e-07	0.79	9.49	-7.08	4.23e-12	1.34e-10	-0.94	0.348275	++?--+	0.456111	1	1.2	1.04			3	172203298	172261297	246	28	54162	0.07	0.47345	-	1
64425	POLR1E	NP_071935.1	0.93	7.5	-5.73	1.6e-08	2.74e-07	0.96	7.5	-2.61	0.00936748	0.0272412	-3.8	0.000144114	------	0.000590561	1	0.8	0.92		-0.4078	9	37465945	37523694	217	15	54162	-0.09	0.53436	+	1	Yes
1890	ECGF1	NP_001944.1	1.16	11.99	5.73	1.61e-08	2.75e-07	1.15	11.99	4.75	2.56e-06	1.95e-05	5	5.64e-07	++++++	5.22e-06	0.0132659	1.36	1.19			22	50944181	50988514	145	28	54162	0.81	0.20861	-	1
23385	NCSTN	NP_056146.1	1.12	9.63	5.73	1.61e-08	2.75e-07	1.15	9.63	6.13	1.6e-09	2.72e-08	2.69	0.00717944	++?++-	0.0173299	1	1.2	1.06			1	160293063	160348742	95	14	54162	0.53	0.29759	+	1
138151	BTBD14A	NP_653254.1	1.08	7.39	5.73	1.66e-08	2.83e-07	1.06	7.39	3.94	9.15e-05	0.000474283	6.69	2.2e-11	++?+++	1.41e-09	5.17e-07	3.88	1.58	0.6573	0.5514	9	138878383	139007131	365	55	54162	-0.56	0.71252	-	1	Yes
1455	CSNK1G2	NP_001310.2	1.2	10.27	5.73	1.67e-08	2.84e-07	1.12	10.27	3.19	0.00148036	0.00547134	4.99	6.07e-07	+++++-	5.54e-06	0.0142907	1.82	1.15			19	1921148	2001337	244	22	54162	0.5	0.31021	+	1
257415	FAM133B	NP_690002.2	0.92	7.26	-5.72	1.69e-08	2.87e-07	0.91	7.26	-5.71	1.78e-08	2.29e-07	-0.62	0.536536	???--?	0.638174	1	0.98	0.99			7	92170072	92239706	123	15	54162	1.01	0.15583	-	1
581	BAX	NP_620120.1	0.9	8.04	-5.72	1.69e-08	2.87e-07	0.94	8.04	-3.27	0.00113901	0.00435648	4.19	2.84e-05	-+?+++	0.000145362	0.66929	0.86	1.03			19	49438117	49485055	114	17	54162	0.46	0.32099	+	1
126308	MOBKL2A	NP_570719.1	1.14	9.12	5.72	1.73e-08	2.94e-07	1.17	9.12	5.99	3.75e-09	5.82e-08	5.02	5.14e-07	++++++	4.84e-06	0.0120841	1.51	1.17			19	2051031	2116501	150	24	54162	-0.02	0.50773	-	1
84064	HDHD2	NP_115500.1	0.94	7.36	-5.72	1.76e-08	2.99e-07	0.93	7.36	-5.95	4.63e-09	7.03e-08	-4.35	1.36e-05	-+?---	7.73e-05	0.319484	0.8	0.91			18	44613781	44696891	233	20	54162	-0.73	0.76878	-	1
63916	ELMO2	NP_573403.1	1.07	8.59	5.71	1.78e-08	3.01e-07	1.08	8.59	6.1	2.03e-09	3.35e-08	-6.49	8.34e-11	--?---	4.16e-09	1.96e-06	0.84	0.9	-0.6078	-0.4872	20	44974689	45055690	76	7	54162	2.61	0.004524	-	1
200942	KLHDC8B	NP_775817.1	1.13	7.68	5.71	1.79e-08	3.02e-07	1.09	7.68	3.39	0.000752593	0.00302473	0.64	0.522101	+-?++-	0.625004	1	1.1	0.99			3	49188987	49233919	54	7	54162	0.34	0.36646	+	1
51397	COMMD10	NP_057228.1	0.92	7.22	-5.71	1.8e-08	3.04e-07	0.89	7.22	-6.98	8.45e-12	2.52e-10	-1.47	0.1413	-+---+	0.218942	1	0.59	0.9			5	115400727	115648978	1130	22	54162	-0.56	0.71241	+	1
103	ADAR	NP_056655.2	1.13	10.03	5.71	1.8e-08	3.05e-07	1.14	10.03	5.45	7.45e-08	8.15e-07	-4.04	5.3e-05	--?--+	0.000249227	1	0.92	0.98			1	154534533	154620456	129	12	54162	0.65	0.25905	-	1	Yes
3636	INPPL1	NP_001558.2	1.11	8.72	5.71	1.81e-08	3.05e-07	1.17	8.72	7.5	2.47e-13	1.06e-11	5.95	2.71e-09	++++++	6.77e-08	6.37e-05	1.35	1.21	0.6632	0.5312	11	71914916	71970191	82	14	54162	0.17	0.43147	+	1	Yes
23352	UBR4	NP_065816.2	1.1	8.9	5.71	1.83e-08	3.08e-07	1.14	8.9	6.9	1.36e-11	3.8e-10	-0.78	0.432805	--?+-+	0.541351	1	0.93	0.98			1	19381000	19556812	338	21	54162	1.49	0.06854	-	1
3150	HMGN1	NP_004956.5	0.9	8.79	-5.71	1.83e-08	3.08e-07	0.9	8.79	-4.98	8.54e-07	7.23e-06	-2.37	0.017575	--?-+-	0.0375576	1	0.88	0.95	-0.643	-0.5299	21	40694241	40741047	135	14	54162	-0.53	0.70179	-	1	Yes
6905	TBCE	NP_001072983.1	0.94	7.31	-5.71	1.85e-08	3.11e-07	0.93	7.31	-6.32	5.15e-10	9.75e-09	-3.17	0.00154251	-+?---	0.00456429	1	0.84	0.94	-0.5108	-0.4155	1	235510728	235632280	268	17	54162	0.07	0.47245	+	1
56886	UGCGL1	NP_064505.1	1.11	7.85	5.71	1.85e-08	3.11e-07	1.12	7.85	5.56	4.06e-08	4.79e-07	1.14	0.252925	-+?++-	0.352957	1	0.9	1			2	128828754	128973251	412	20	54162	0.01	0.49765	+	1
387066	C6orf160	XP_948792.1	0.86	8.53	-5.71	1.87e-08	3.15e-07	0.84	8.53	-5.7	1.88e-08	2.41e-07	-0.21	0.836387	???--?	0.884771	1	0.98	0.99
8654	PDE5A	NP_001074.2	1.09	7.3	5.71	1.87e-08	3.15e-07	1.06	7.3	3.49	0.000522165	0.00220166	3.34	0.000826786	?+?+++	0.00266205	1	1.15	1.1			4	120395550	120569981	433	17	54162	-0.81	0.79081	-	1
2664	GDI1	NP_001484.1	1.09	8.15	5.7	1.88e-08	3.16e-07	1.09	8.15	5.2	2.72e-07	2.62e-06	-1.22	0.222748	---++-	0.318559	1	0.85	0.94
79153	GDPD3	NP_077283.2	1.09	7.54	5.7	1.89e-08	3.18e-07	1.11	7.54	6.07	2.31e-09	3.79e-08	3.99	6.69e-05	++?++-	0.0003048	1	1.33	1.14	0.591	0.4847	16	30095977	30145264	45	9	54162	1.21	0.11259	-	1
5694	PSMB6	NP_002789.1	0.91	9.8	-5.7	1.91e-08	3.2e-07	0.92	9.8	-4.4	1.28e-05	8.14e-05	-1.75	0.0798076	---+--	0.135342	1	0.54	0.88			17	4679439	4721798	95	21	54162	0.21	0.41803	+	1
255520	ELMOD2	NP_714913.1	0.95	6.87	-5.7	1.94e-08	3.25e-07	0.94	6.87	-6.53	1.46e-10	3.16e-09	2.74	0.00612343	++?++-	0.0151286	1	1.1	1.04			4	141425312	141494924	124	11	54162	0.68	0.24796	+	1
4253	CTAGE5	NP_976231.1	1.08	7.74	5.7	1.94e-08	3.25e-07	1.1	7.74	5.94	4.99e-09	7.5e-08	2.86	0.00424332	-+?++-	0.0110326	1	0.83	1			14	39714476	39840397	276	16	54162	0.38	0.35164	+	1
647673	LOC647673	XP_941824.1	0.86	7.64	-5.7	1.97e-08	3.29e-07	0.83	7.64	-6.24	8.61e-10	1.55e-08
85464	SSH2	NP_203747.2	1.13	10.28	5.69	1.99e-08	3.33e-07	1.11	10.28	4.32	1.82e-05	0.000111387	7.17	7.23e-13	-+++++	1.03e-10	1.7e-08	1.35	1.14	0.6917	0.559	17	27932956	28277231	355	12	54162	1.64	0.050499	-	1
400077	FLJ42957	NP_997319.1	1.12	7.64	5.69	2e-08	3.34e-07	1.14	7.64	5.67	2.34e-08	2.92e-07	-0.17	0.862168	???-+?	0.903161	1	1.06	1.01		-0.4165
10548	TM9SF1	NP_006396.2	1.07	7.62	5.69	2.01e-08	3.35e-07	1.06	7.62	4.91	1.17e-06	9.59e-06	3.68	0.000233531	+-?++-	0.000896703	1	1.12	1.04	0.6416	0.5562	14	24638353	24686288	98	18	54162	0.07	0.47052	-	1
5199	CFP	NP_002612.1	1.12	8.65	5.69	2.01e-08	3.36e-07	1.11	8.65	4.94	1.05e-06	8.69e-06	2.59	0.0096671	???++-	0.0224083	1	1.08	1.04
4689	NCF4	NP_038202.1	1.12	8.01	5.69	2.02e-08	3.36e-07	1.11	8.01	4.6	5.19e-06	3.66e-05	6.95	3.71e-12	?+?++-	3.5e-10	8.72e-08	1.52	1.24	0.6077	0.4707	22	37237030	37294059	138	28	54162	1.36	0.087641	+	1
23399	DULLARD	NP_056158.2	1.08	7.82	5.69	2.05e-08	3.42e-07	1.1	7.82	5.97	4.22e-09	6.47e-08	4.28	1.87e-05	++++++	0.000101918	0.440695	1.33	1.1			17	7126906	7175259	51	6	54162	1.54	0.061911	-	1
9112	MTA1	NP_004680.2	1.06	7.64	5.69	2.05e-08	3.42e-07	1.06	7.64	5.02	6.85e-07	5.95e-06	1.91	0.0556699	+-?++-	0.100167	1	1.66	1.12			14	105866186	105957066	4	2	54162	1.98	0.023884	+	1
11315	PARK7	NP_009193.2	0.9	8.14	-5.69	2.08e-08	3.46e-07	0.88	8.14	-5.84	8.74e-09	1.22e-07	-0.38	0.706022	-+++-+	0.78378	1	0.94	0.99			1	8001714	8065342	98	10	54162	0.06	0.47646	+	1
3211	HOXB1	NP_002135.2	0.97	6.83	-5.69	2.08e-08	3.46e-07	0.97	6.83	-4.33	1.74e-05	0.000106946	2.48	0.0133162	???+++	0.0295874	1	1.1	1.05			17	46586807	46628272	107	13	54162	1.33	0.092534	-	1
3996	LLGL1	NP_004131.3	1.07	7.7	5.69	2.08e-08	3.46e-07	1.11	7.7	7.76	4.11e-14	2.08e-12	2.59	0.00971247	++?+++	0.0225024	1	1.67	1.17			17	18108907	18168189	110	12	54162	0.15	0.44136	+	1
285172	FAM126B	NP_776183.1	1.15	8.69	5.69	2.09e-08	3.47e-07	1.08	8.69	2.78	0.00568273	0.0176565	-1.89	0.0584702	-+?---	0.104497	1	0.62	0.89			2	201818441	201956392	188	14	54162	0.16	0.43593	-	1	Yes
6879	TAF7	NP_005633.2	0.89	7.52	-5.68	2.17e-08	3.59e-07	0.86	7.52	-6.87	1.65e-11	4.52e-10	-0.02	0.983052	-+-+--	0.988302	1	0.83	0.95			5	140678057	140720351	110	16	54162	-0.47	0.6792	-	1
64770	CCDC14	NP_073594.3	0.9	7.55	-5.68	2.18e-08	3.6e-07	0.86	7.55	-6.72	4.49e-11	1.11e-09	-4.34	1.43e-05	-+----	8.08e-05	0.336619	0.75	0.91			3	123596152	123700255	160	15	54162	0.17	0.43302	-	1
23287	AGTPBP1	NP_056054.1	0.89	8.59	-5.68	2.19e-08	3.62e-07	0.86	8.59	-6.96	9.7e-12	2.83e-10	-3.87	0.000107296	-+----	0.000458359	1	0.52	0.84	0.6287	0.464	9	88141454	88376944	589	18	54162	0.65	0.25728	-	1
83641	FAM107B	NP_113641.2	0.9	9.36	-5.68	2.2e-08	3.64e-07	0.88	9.36	-6.05	2.57e-09	4.14e-08	3.31	0.000924994	++++++	0.00293212	1	2.31	1.34			10	14540556	14836896	1030	91	54162	-0.56	0.71279	-	1
29074	MRPL18	NP_054880.2	0.91	7.99	-5.67	2.24e-08	3.7e-07	0.91	7.99	-4.88	1.41e-06	1.14e-05	-2.23	0.0259539	-++---	0.0525103	1	0.59	0.91			6	160191492	160239461	161	14	54162	-1.16	0.87724	+	1
8851	CDK5R1	NP_003876.1	1.1	7.65	5.67	2.24e-08	3.7e-07	1.02	7.65	1.16	0.245508	0.391401	-5.44	5.44e-08	-----+	7.65e-07	0.00127944	0.76	0.86	-0.6544	-0.5102	17	30794105	30838271	51	11	54162	0.88	0.18956	+	1
58505	DC2	NP_067050.1	0.89	8.42	-5.67	2.25e-08	3.71e-07	0.86	8.42	-6.81	2.48e-11	6.55e-10	1.95	0.0507515	-+?++-	0.092515	1	0.69	0.96			4	109551741	109608978	105	5	54162	-1.06	0.85627	+	1
5569	PKIA	NP_862822.1	0.92	7.14	-5.67	2.25e-08	3.72e-07	0.91	7.14	-5.7	1.93e-08	2.45e-07	-4.66	3.09e-06	-+----	2.19e-05	0.0726265	0.71	0.86			8	79408336	79537502	260	16	54162	-0.24	0.59509	+	1	Yes
8728	ADAM19	NP_150377.1	1.14	9.84	5.67	2.26e-08	3.72e-07	1.13	9.84	4.71	3.14e-06	2.34e-05	4.61	3.94e-06	-+?+++	2.7e-05	0.0926702	1.22	1.07			5	156802071	157022831	698	34	54162	-1.36	0.91328	-	1
219844	HYLS1	NP_659451.1	0.95	7.16	-5.67	2.28e-08	3.76e-07	0.95	7.16	-4.81	1.96e-06	1.53e-05	-4.04	5.23e-05	------	0.000246909	1	0.63	0.86			11	125733509	125790541	158	18	54162	1.13	0.1294	+	1
10801	Septin 9	NP_006631.2	1.1	12.32	5.67	2.29e-08	3.76e-07	1.13	12.32	6.47	2.14e-10	4.48e-09	1.43	0.15316	--?++-	0.233925	1	0.92	0.99			17	75257492	75516678	687	71	54162	-0.5	0.69195	+	1	Yes
7695	ZNF136	XP_001126650.1	0.95	6.99	-5.67	2.29e-08	3.76e-07	0.97	6.77	-5.15	3.67e-07	3.41e-06	-0.16	0.876491	-+?+--	0.913177	1	0.79	0.94			19	12253872	12320064	85	8	54162	0.86	0.1957	+	1
57103	C12orf5	NP_065108.1	0.96	6.99	-5.67	2.3e-08	3.77e-07	0.95	6.99	-6.27	7.26e-10	1.33e-08	-3.26	0.00110444	-+?---	0.00341852	1	0.64	0.84			12	4410359	4489194	181	28	54162	-2.11	0.98244	+	1
7568	ZNF20	NP_066966.2	0.95	7.17	-5.67	2.31e-08	3.78e-07	0.94	7.17	-5.79	1.15e-08	1.56e-07	-2.38	0.0171377	???--?	0.0367092	1	0.97	0.97			19	12222165	12271222	64	7	54162	0.68	0.24947	-	1
64132	XYLT2	NP_071450.2	1.07	8.24	5.67	2.34e-08	3.83e-07	1.09	8.24	6.59	1.03e-10	2.33e-09	-0.48	0.631876	+-?--+	0.720687	1	1.2	1.03			17	48403393	48460512	183	14	54162	-0.31	0.62277	+	1
6195	RPS6KA1	NP_002944.2	1.1	9.41	5.66	2.37e-08	3.88e-07	1.13	9.41	6.16	1.37e-09	2.37e-08	4.96	6.97e-07	++?+++	6.22e-06	0.0164034	1.23	1.11	0.5928	0.4594	1	26836249	26921520	162	21	54162	0.98	0.1644	+	1	Yes
2717	GLA	NP_000160.1	1.09	8.73	5.66	2.41e-08	3.94e-07	1.07	8.73	3.8	0.000157897	0.000772212	2.12	0.0339018	-+?++-	0.0658719	1	0.94	1.01													Yes
55325	UFSP2	NP_060829.1	0.96	7.05	-5.66	2.41e-08	3.95e-07	0.96	7.05	-5.03	6.64e-07	5.78e-06	-3.8	0.00014576	------	0.000596269	1	0.6	0.87			4	186300691	186367139	164	18	54162	0.15	0.43886	-	1
8766	RAB11A	NP_004654.1	0.88	8.55	-5.66	2.42e-08	3.95e-07	0.82	8.55	-7.69	6.75e-14	3.24e-12	-4.91	9.24e-07	------	7.93e-06	0.0217372	0.3	0.74	-0.6484	-0.538	15	66141629	66204329	111	10	54162	0.07	0.47088	+	1
6821	SUOX	NP_000447.2	1.07	7.53	5.66	2.42e-08	3.95e-07	1.06	7.53	4.55	6.69e-06	4.59e-05	-5.37	7.76e-08	+-?---	1.02e-06	0.00182557	0.86	0.94			12	56371043	56419309	57	7	54162	0.49	0.31138	+	1
84464	BTBD12	NP_115820.2	1.06	7.37	5.65	2.49e-08	4.06e-07	1.08	7.37	6.56	1.19e-10	2.64e-09	-5.17	2.3e-07	+-?--+	2.46e-06	0.00541217	0.87	0.95		-0.436	16	3611182	3681585	170	8	54162	0.29	0.38586	-	1
2217	FCGRT	NP_004098.1	1.12	10.75	5.65	2.5e-08	4.07e-07	1.13	10.75	5.43	8.2e-08	8.89e-07	5.9	3.63e-09	?+++++	8.4e-08	8.53e-05	1.42	1.17	0.6091	0.5115	19	49995536	50049685	137	7	54162	1.46	0.071527	+	1
441124	LOC441124	XP_499022.2	1.08	7.17	5.65	2.52e-08	4.1e-07	1.09	7.17	5.61	3.13e-08	3.79e-07	-0.49	0.624426	?-????	0.71435	1	0.97	0.97
22985	ACIN1	NP_055792.1	1.06	8.62	5.65	2.58e-08	4.19e-07	1.08	8.62	6.35	4.4e-10	8.5e-09	5.85	4.9e-09	++?+++	1.07e-07	0.000115252	1.45	1.15	0.6329	0.4974	14	23507773	23584823	151	22	54162	0.86	0.19509	-	1
57184	C15orf17	NP_065180.1	1.05	7.58	5.65	2.6e-08	4.21e-07	1.06	7.58	5.47	6.8e-08	7.54e-07	-5.96	2.59e-09	--?---	6.54e-08	6.08e-05	0.79	0.88	-0.615	-0.5119	15	75172328	75219462	56	7	54162	0.81	0.20825	-	1
80173	IFT74	NP_001092692.1	0.96	6.77	-5.65	2.61e-08	4.22e-07	0.95	6.77	-6.5	1.75e-10	3.72e-09	3.04	0.00234608	++?+++	0.00660327	1	1.59	1.14			9	26927037	27082931	378	24	54162	-1.67	0.95286	+	1	Yes
1827	RCAN1	NP_981962.1	0.94	7.06	-5.64	2.62e-08	4.24e-07	0.93	7.06	-6.32	5.35e-10	1.01e-08	-0.71	0.474965	-+?---	0.581595	1	0.73	0.95			21	35868782	36007382	540	30	54162	0.21	0.41822	-	1
6293	VPS52	NP_072047.4	1.07	7.75	5.64	2.63e-08	4.25e-07	1.1	7.75	6.95	9.78e-12	2.85e-10	-1.07	0.284772	+-?+--	0.388851	1	0.75	0.94			6	33198049	33259723	138	20	54162	0.08	0.46935	-	1
10450	PPIE	NP_982282.1	0.93	7.38	-5.64	2.63e-08	4.25e-07	0.96	7.38	-3.26	0.00118055	0.00449016	-3.67	0.000243293	--+--+	0.000928878	1	0.62	0.91			1	40184517	40249586	155	25	54162	-0.95	0.82955	+	1
84246	MED10	NP_115662.2	0.93	7.93	-5.64	2.64e-08	4.26e-07	0.93	7.93	-4.83	1.72e-06	1.36e-05	-5.98	2.26e-09	--?---	5.89e-08	5.31e-05	0.72	0.87	-0.6392	-0.4888	5	6352039	6398639	143	19	54162	0.46	0.32123	-	1
115207	KCTD12	NP_612453.1	1.15	9.59	5.64	2.64e-08	4.27e-07	1.1	9.59	3.32	0.000945716	0.00369074	4.89	1.01e-06	++?+++	8.51e-06	0.0236498	1.46	1.22			13	77434304	77480540	114	21	54162	1.02	0.15402	-	1
5976	UPF1	NP_002902.2	1.09	7.93	5.64	2.66e-08	4.29e-07	1.11	7.93	6.28	6.89e-10	1.26e-08	0.24	0.813321	--?++-	0.866496	1	0.85	0.96			19	18922744	18999039	141	19	54162	-0.14	0.55482	+	1
7916	BAT2	NP_542417.2	1.09	7.77	5.64	2.68e-08	4.32e-07	1.13	7.77	7.15	2.65e-12	8.83e-11	0.37	0.711431	--?+++	0.787875	1	0.93	1			6	31568450	31625554	190	32	54162	1.86	0.03175	+	1
5598	MAPK7	NP_620601.1	1.06	7.27	5.64	2.69e-08	4.33e-07	1.08	7.27	7	7.26e-12	2.21e-10	4.69	2.71e-06	?-+++-	1.96e-05	0.0637032	1.26	1.08			17	19261034	19306857	41	8	54162	0.62	0.26778	+	1
10379	IRF9	NP_006075.3	1.12	10.73	5.63	2.79e-08	4.49e-07	1.08	10.73	3.26	0.00118438	0.0045017	2.17	0.0303159	-+?+++	0.0598384	1	1.22	1.07			14	24610422	24655774	60	12	54162	0.04	0.48319	+	1	Yes
5589	PRKCSH	NP_001001329.1	1.08	8.27	5.63	2.81e-08	4.52e-07	1.13	8.27	8.05	4.81e-15	3.16e-13	3.24	0.00119163	+-++++	0.00365092	1	1.26	1.1			19	11526111	11581783	81	11	54162	0.25	0.40024	+	1
6888	TALDO1	NP_006746.1	1.13	12.73	5.63	2.82e-08	4.52e-07	1.1	12.73	3.73	0.000212083	0.00100566	-1.19	0.235802	--?--+	0.333499	1	0.82	0.96			11	727417	785024	107	13	54162	0.87	0.19312	+	1
3705	ITPK1	NP_055031.2	1.13	8.57	5.63	2.82e-08	4.52e-07	1.09	8.57	3.52	0.000458915	0.00196742	4.87	1.12e-06	++++++	9.29e-06	0.0262794	1.2	1.13			14	93383259	93602263	610	40	54162	-0.97	0.83511	-	1
128061	C1orf131	NP_689592.2	0.92	7.63	-5.63	2.82e-08	4.52e-07	0.9	7.63	-6.59	9.97e-11	2.27e-09	-3.39	0.000687691	--?--+	0.00227522	1	0.85	0.94			1	231339509	231396933	159	25	54162	0.8	0.21216	-	1
11165	NUDT3	NP_006694.1	0.93	8.22	-5.63	2.85e-08	4.57e-07	0.92	8.22	-5.79	1.15e-08	1.55e-07	1.75	0.0800455	?++++?	0.135667	1	1.07	1.04	0.4734	0.4505	6	34234971	34380457	276	10	54162	1.29	0.09905	-	1
80727	TTYH3	NP_079526.1	1.08	7.72	5.63	2.85e-08	4.57e-07	1.1	7.72	5.72	1.7e-08	2.21e-07	-5.3	1.17e-07	--?---	1.41e-06	0.00275019	0.85	0.88	-0.528	-0.4404	7	2651603	2724436	179	28	54162	-0.67	0.74799	+	1	Yes
23466	CBX6	NP_055107.3	1.09	8.56	5.62	2.94e-08	4.7e-07	1.11	8.56	6.33	4.93e-10	9.41e-09	-1.21	0.225321	+-?---	0.321418	1	1.16	1			22	39237468	39288258	109	17	54162	-0.63	0.73623	-	1
115825	WDFY2	NP_443182.1	1.07	7.94	5.62	2.96e-08	4.73e-07	1.07	7.94	5.06	5.66e-07	5.03e-06	3.75	0.00017345	?+?+++	0.000692328	1	1.15	1.08	0.5971	0.4565	13	52138484	52360935	252	25	54162	2.38	0.0085777	+	1	Yes
253980	KCTD13	NP_849194.1	1.06	8.13	5.62	2.98e-08	4.77e-07	1.09	8.13	6.89	1.52e-11	4.2e-10	-2.66	0.0078313	---+--	0.0186906	1	0.75	0.9			16	29897657	29957545	53	6	54162	1.61	0.053722	-	1
29894	CPSF1	NP_037423.2	1.09	7.77	5.62	3.02e-08	4.83e-07	1.12	7.77	6.56	1.2e-10	2.66e-09	5.75	8.7e-09	???++?	1.72e-07	0.000204768	1.2	1.16			8	145598446	145654733	65	7	54162	-0.47	0.6813	-	1
7846	TUBA1A	NP_006000.2	1.1	11.74	5.62	3.07e-08	4.9e-07	1.09	11.74	4.6	5.12e-06	3.61e-05	-3.88	0.000103138	+-----	0.000443256	1	0.76	0.92		-0.5202	12	49558578	49603107	45	3	54162	-0.93	0.8229	-	1
140459	ASB6	NP_821066.1	1.05	7.37	5.61	3.1e-08	4.94e-07	1.07	7.37	7.03	6.06e-12	1.88e-10	-4.84	1.32e-06	--+---	1.08e-05	0.031145	0.62	0.91	-0.6059	-0.5544	9	132376883	132424496	134	22	54162	-0.86	0.80601	-	1
80306	MED28	NP_079481.2	0.92	8.1	-5.61	3.1e-08	4.94e-07	0.89	8.1	-7.29	1.02e-12	3.75e-11	-2.61	0.00915984	-+?---	0.0213969	1	0.69	0.91	0.6431	0.5614	4	17596273	17646160	124	4	54162	-0.66	0.74526	+	1
3482	IGF2R	NP_000867.2	1.18	10.96	5.61	3.12e-08	4.96e-07	1.15	10.96	4.17	3.54e-05	0.000201848	3.13	0.0017699	++?+++	0.005151	1	1.32	1.11	0.6823	0.5309	6	160370131	160547583	376	44	54162	0.17	0.43339	+	1
84885	ZDHHC12	NP_116188.2	1.06	7.7	5.61	3.15e-08	5e-07	1.04	7.7	2.95	0.00330122	0.0110102	1.05	0.296021	???+++	0.401023	1	1.02	1.01			9	131463148	131506451	23	5	54162	1.68	0.046885	-	1
6256	RXRA	NP_002948.1	1.13	10.78	5.61	3.15e-08	5e-07	1.14	10.78	5.24	2.32e-07	2.28e-06	5.5	3.7e-08	++++++	5.57e-07	0.000870114	1.52	1.21	0.661	0.5371	9	137198316	137352431	361	30	54162	0.85	0.19812	+	1
83852	SETDB2	NP_114121.1	0.93	7.46	-5.61	3.18e-08	5.06e-07	0.91	7.46	-6.52	1.52e-10	3.28e-09	3.08	0.00207223	+++++-	0.00592246	1	1.11	1.06			13	49998429	50089139	211	20	54162	-0.95	0.82918	+	1
11180	WDR6	NP_060501.2	1.12	9.23	5.61	3.21e-08	5.09e-07	1.18	9.23	7.44	3.68e-13	1.51e-11	5.6	2.16e-08	++?+++	3.59e-07	0.000508036	1.59	1.2	0.6657	0.5546	3	49024637	49073386	30	6	54162	0.26	0.39745	+	1
6843	VAMP1	NP_954740.1	1.09	8.48	5.61	3.23e-08	5.13e-07	1.06	8.48	3.42	0.000682079	0.00277962	-5.85	4.87e-09	--?---	1.07e-07	0.000114603	0.36	0.73	-0.6129	-0.4906	12	6551403	6599843	171	16	54162	1.49	0.067773	-	1
10147	SFRS14	NP_055699.1	1.09	8.91	5.61	3.25e-08	5.15e-07	1.1	8.91	5.22	2.5e-07	2.43e-06	3.99	6.47e-05	++?+++	0.000296243	1	1.34	1.11			19	19081697	19164861	139	13	54162	-0.89	0.81308	-	1
65110	UPF3A	NP_542418.1	0.93	7.3	-5.6	3.27e-08	5.19e-07	0.92	7.3	-5.95	4.7e-09	7.11e-08	-1.64	0.100389	-+----	0.164484	1	0.7	0.93			13	115027059	115091292	129	15	54162	0.04	0.48222	+	1
25799	ZNF324	NP_055162.1	1.09	8.26	5.6	3.29e-08	5.21e-07	1.12	8.26	6.59	1.03e-10	2.33e-09	2.81	0.00495031	+-++++	0.0126116	1	1.37	1.07			19	58958412	59004945	70	8	54162	-1.56	0.94059	+	1
359948	IRF2BP2	NP_892017.2	1.05	7.29	5.6	3.34e-08	5.28e-07	1.06	7.29	5.55	4.28e-08	5.02e-07	4.79	1.65e-06	++?+++	1.29e-05	0.0389156	1.55	1.2	0.6199	0.4967	1	234720015	234765271	120	22	54162	-0.97	0.83356	-	1
29103	DNAJC15	NP_037370.2	0.92	7.17	-5.6	3.36e-08	5.32e-07	0.9	7.17	-6.65	6.87e-11	1.64e-09	-0.24	0.812641	-+?++-	0.865929	1	0.77	0.94			13	43577362	43703306	275	14	54162	1.54	0.061209	+	1
90594	ZNF439	NP_689475.1	0.94	6.96	-5.6	3.37e-08	5.32e-07	0.93	6.96	-6.16	1.41e-09	2.42e-08	-1.84	0.0650857	-+?---	0.11428	1	0.7	0.91			19	11939541	12000306	194	18	54162	-0.97	0.83521	+	1	Yes
55148	C14orf130	NP_001093887.1	0.96	6.9	-5.6	3.37e-08	5.33e-07	0.96	6.9	-5.44	8.03e-08	8.73e-07	-4.6	4.29e-06	--?---	2.91e-05	0.100938	0.65	0.84			14	93653401	93715561	154	28	54162	-0.04	0.51542	+	1
6118	RPA2	NP_002937.1	0.91	9.28	-5.59	3.45e-08	5.44e-07	0.9	9.28	-5.47	6.95e-08	7.67e-07	-3.89	0.000100839	------	0.000434568	1	0.72	0.9			1	28198035	28261255	188	13	54162	0.26	0.39812	-	1
25998	IBTK	NP_056340.2	0.92	7.08	-5.59	3.47e-08	5.47e-07	0.91	7.08	-5.79	1.14e-08	1.55e-07	-1.86	0.0629769	-+?---	0.111158	1	1.07	0.98		-0.4565	6	82859956	82977448	256	13	54162	0.16	0.43694	-	1
53340	SPA17	NP_059121.1	0.97	6.77	-5.59	3.48e-08	5.49e-07	0.97	6.77	-5.3	1.63e-07	1.65e-06	-4.81	1.51e-06	--?---	1.2e-05	0.0355252	0.56	0.79	-0.6634	-0.518	11	124523740	124584690	72	7	54162	0.24	0.40523	+	1
642267	LOC642267	XP_935798.1	1.08	7.15	5.59	3.62e-08	5.7e-07	1.07	7.15	4.25	2.45e-05	0.00014531
6155	RPL27	NP_000979.1	0.8	11.21	-5.59	3.63e-08	5.7e-07	0.78	11.21	-5.43	8.21e-08	8.91e-07	-1.08	0.278284	++?-+-	0.381764	1	1.07	1			17	41130446	41174976	60	7	54162	-0.31	0.62277	+	1
29121	CLEC2D	NP_037401.1	0.84	10.61	-5.58	3.65e-08	5.73e-07	0.82	10.61	-5.84	9.01e-09	1.25e-07	2.71	0.00680739	?+?+++	0.0165576	1	1.08	1.05													Yes
79951	FLJ11783	NP_079167.1	1.05	7.21	5.58	3.7e-08	5.8e-07	1.06	7.21	5.42	8.77e-08	9.45e-07	1.91	0.0555258	??+-+?	0.0999558	1	1.21	1.09
8477	GPR65	NP_003599.2	0.88	7.46	-5.58	3.71e-08	5.81e-07	0.85	7.46	-6.45	2.42e-10	5.01e-09	5.9	3.64e-09	?+?+++	8.41e-08	8.57e-05	1.48	1.25			14	88451468	88501155	147	14	54162	0.64	0.2607	+	1
644511	LOC644511	XP_946727.1	0.85	9.82	-5.58	3.75e-08	5.88e-07	0.88	9.82	-4.08	5.21e-05	0.000286856	0.74	0.458534	?????+	0.565536	1	1.03	1.03
79894	ZNF672	NP_079112.1	1.07	8.17	5.58	3.77e-08	5.9e-07	1.11	8.17	7.12	3.34e-12	1.09e-10	3.18	0.00145756	-+++++	0.00434956	1	1.32	1.04			1	249112409	249163716	70	8	54162	-0.05	0.5199	+	1
25981	DNAH1	NP_056327.3	1.07	7.68	5.58	3.77e-08	5.9e-07	1.08	7.68	6.04	2.8e-09	4.46e-08	-4.23	2.3e-05	--?--+	0.000121367	0.541783	0.87	0.92	-0.559	-0.4778	3	52330335	52454513	143	11	54162	-0.08	0.53109	+	1
55486	PARL	NP_061092.3	0.93	8.46	-5.58	3.83e-08	5.99e-07	0.93	7.57	-5.08	5.06e-07	4.56e-06	-5.92	3.22e-09	--?--+	7.72e-08	7.58e-05	0.74	0.88	-0.6204	-0.5037	3	183523522	183622693	292	17	54162	0.92	0.1785	-	1
6402	SELL	NP_000646.1	1.15	11.73	5.57	3.85e-08	6.02e-07	1.14	11.73	4.68	3.66e-06	2.68e-05	6.32	2.53e-10	++?+++	1.01e-08	5.96e-06	1.67	1.29	0.6332	0.4834	1	169639806	169700843	232	27	54162	0.69	0.24609	-	1
7125	TNNC2	NP_003270.1	0.97	6.71	-5.57	3.85e-08	6.02e-07	0.98	6.71	-4.37	1.48e-05	9.24e-05	0.55	0.581544	-??+++	0.677929	1	0.79	0.96			20	44431853	44475953	104	15	54162	1.1	0.13537	-	1
90673	PPP1R3E	XP_932122.1	1.05	7.18	5.57	3.9e-08	6.09e-07	1.07	7.18	5.86	7.67e-09	1.09e-07	-1.87	0.0620356	--?--+	0.109752	1	0.71	0.92			14	23744861	23792071	54	12	54162	0.19	0.42423	-	1	Yes
260294	NSUN5C	NP_684281.1	1.09	7.47	5.57	3.94e-08	6.14e-07	1.11	7.47	6.4	3.35e-10	6.68e-09	-0.91	0.363916	???-+?	0.472439	1	0.98	1
2194	FASN	NP_004095.4	1.11	7.76	5.57	3.95e-08	6.15e-07	1.19	7.76	8.07	4.36e-15	2.9e-13	-0.15	0.8832	---+++	0.91861	1	0.72	0.94			17	80016214	80076106	109	11	54162	-0.39	0.65042	-	1
64651	AXUD1	NP_149016.1	1.13	8.74	5.57	3.98e-08	6.19e-07	1.13	8.74	4.91	1.18e-06	9.7e-06	6.31	2.74e-10	+++++-	1.07e-08	6.46e-06	2.13	1.3	0.5807	0.4533	3	39163342	39216093	151	22	54162	0.64	0.26061	-	1
23303	KIF13B	NP_056069.2	1.06	7.51	5.57	4.03e-08	6.27e-07	1.08	7.51	6.44	2.61e-10	5.35e-09	2.62	0.00885913	++?+++	0.0207977	1	1.85	1.19			8	28904795	29140610	392	35	54162	-0.01	0.50284	-	1	Yes
5770	PTPN1	NP_002818.1	1.1	9.39	5.56	4.09e-08	6.35e-07	1.1	9.39	5.05	6e-07	5.29e-06	0.54	0.590259	---+++	0.685324	1	0.92	0.99			20	49106858	49221299	271	22	54162	-0.41	0.6588	+	1
6872	TAF1	NP_620278.1	0.96	6.9	-5.56	4.12e-08	6.39e-07	0.96	6.9	-5.71	1.8e-08	2.31e-07	0.86	0.38754	+-?+-+	0.49664	1	1.37	1.06
513	ATP5D	NP_001678.1	1.1	10.12	5.56	4.13e-08	6.41e-07	1.13	10.12	6.29	6.52e-10	1.2e-08	0.73	0.468128	--?+++	0.575139	1	0.81	0.95			19	1221749	1264824	43	6	54162	-1.05	0.85339	+	1
83538	TTC25	NP_113609.1	0.91	7.09	-5.56	4.24e-08	6.58e-07	0.95	7.09	-2.81	0.00505047	0.0159247	-2.04	0.0417685	--?---	0.0786061	1	0.96	0.97			17	40066888	40137669	101	12	54162	-0.05	0.51864	+	1
55646	LYAR	NP_060286.1	0.9	8.47	-5.56	4.27e-08	6.62e-07	0.91	8.47	-4.59	5.42e-06	3.8e-05	4.74	2.17e-06	++?++-	1.63e-05	0.0510863	1.42	1.13	0.6382	0.5324	4	4249428	4311896	238	27	54162	-0.8	0.78871	-	1
5971	RELB	NP_006500.2	1.08	7.56	5.55	4.29e-08	6.64e-07	1.08	7.56	4.77	2.34e-06	1.79e-05	0.45	0.649661	?-?++-	0.735849	1	0.97	1			19	45484707	45561456	115	20	54162	8.79	7.25e-19	+	1.32e-14
2794	GNL1	NP_005266.2	1.06	7.54	5.55	4.29e-08	6.64e-07	1.06	7.54	5.3	1.7e-07	1.71e-06	0.67	0.500615	--?++-	0.605285	1	0.69	0.91			6	30489154	30545371	100	10	54162	1.72	0.042944	-	1
256364	EML3	NP_694997.2	1.11	9.23	5.55	4.3e-08	6.65e-07	1.18	9.23	8.05	4.73e-15	3.13e-13	3.94	8.2e-05	+-?+++	0.000363135	1	1.4	1.13			11	62349690	62400492	40	4	54162	-0.19	0.5737	-	1
3779	KCNMB1	NP_004128.1	1.06	7.38	5.55	4.33e-08	6.69e-07	1.04	7.38	3.19	0.00148517	0.00548466	1.09	0.277263	?-?+++	0.380631	1	1.17	1.03			5	169785165	169836681	175	32	54162	-0.89	0.81379	-	1
729021	LOC729021		1.19	9.61	5.55	4.37e-08	6.74e-07	1.2	9.61	5.25	2.19e-07	2.15e-06
6993	DYNLT1	NP_006510.1	0.88	9.03	-5.55	4.37e-08	6.74e-07	0.82	9.03	-7.73	4.81e-14	2.37e-12	4.99	6.05e-07	+++++-	5.52e-06	0.0142382	1.28	1.12	0.6718	0.5484	6	159037506	159085804	124	13	54162	-0.79	0.78573	-	1	Yes
9546	APBA3	NP_004877.1	1.07	8.33	5.55	4.45e-08	6.85e-07	1.13	8.33	8.13	2.7e-15	1.86e-13	3.51	0.000446759	++?+++	0.00156386	1	1.42	1.11	0.6005	0.4756	19	3730771	3781673	174	31	54162	0.17	0.43282	-	1
3055	HCK	NP_002101.2	1.12	10.27	5.55	4.46e-08	6.87e-07	1.1	10.27	3.93	9.54e-05	0.000492514	5.12	2.99e-07	++?+++	3.07e-06	0.00704335	1.66	1.22			20	30619991	30709659	124	19	54162	-0.21	0.58249	+	1
10771	ZMYND11	NP_006615.1	0.87	8.47	-5.55	4.47e-08	6.88e-07	0.86	8.47	-5.11	4.32e-07	3.94e-06	-2.03	0.0422514	++?--+	0.0794007	1	1.31	1.01			10	160405	320577	242	22	54162	1.6	0.0547	+	1
4338	MOCS2	NP_789776.1	0.97	6.74	-5.54	4.57e-08	7.02e-07	0.97	6.74	-5.88	6.96e-09	1e-07	-4.5	6.64e-06	-+?---	4.22e-05	0.156343	0.53	0.83		-0.4441	5	52371509	52425602	189	20	54162	1.24	0.10743	-	1
26272	FBXO4	NP_036308.1	0.96	6.84	-5.54	4.59e-08	7.06e-07	0.94	6.84	-7.08	4.16e-12	1.32e-10	-3.27	0.00108763	--?---	0.003374	1	0.68	0.89	-0.5139	-0.451	5	41905352	41961672	78	6	54162	0.77	0.22055	+	1
7317	UBE1	NP_003325.2	1.13	9.42	5.54	4.6e-08	7.07e-07	1.18	9.42	6.79	2.9e-11	7.52e-10	2.96	0.00309719	--?+++	0.00839982	1	0.78	0.98
54851	ANKRD49	NP_060174.2	0.89	7.5	-5.54	4.62e-08	7.08e-07	0.85	7.5	-7.06	4.91e-12	1.54e-10	2.98	0.0028736	-++++-	0.0078733	1	1.1	1.02	0.6562	0.5513	11	94207153	94252744	93	10	54162	-0.13	0.55351	+	1
84191	FAM96A	NP_115607.1	0.88	8.51	-5.54	4.67e-08	7.16e-07	0.8	8.51	-8.04	5.11e-15	3.33e-13	2.16	0.03116	-+?++-	0.0612784	1	1.17	1.03			15	64344761	64406207	97	8	54162	2.99	0.0013953	-	1
22820	COPG	NP_057212.1	1.08	7.81	5.54	4.71e-08	7.22e-07	1.09	7.81	5.76	1.42e-08	1.87e-07	-2	0.0454188	---+--	0.084276	1	0.85	0.94		-0.4808	3	128948453	129016616	102	6	54162	0.63	0.26297	+	1
22900	CARD8	NP_055774.1	1.12	8.94	5.54	4.75e-08	7.27e-07	1.06	8.94	2.4	0.0167645	0.0447181	5.5	3.75e-08	++?+++	5.64e-07	0.000883376	1.48	1.22			19	48691343	48779203	346	26	54162	-1	0.84022	-	1
85478	CCDC65	NP_149115.1	0.96	6.79	-5.53	4.91e-08	7.51e-07	0.95	6.79	-5.43	8.48e-08	9.16e-07	-3.28	0.0010245	?-?---	0.00320095	1	0.82	0.92			12	49277893	49345696	158	10	54162	0.31	0.37736	+	1
54878	DPP8	NP_060213.2	1.06	8.05	5.53	4.92e-08	7.52e-07	1.05	8.05	4.07	5.35e-05	0.000293363	-5.54	3.03e-08	--?---	4.73e-07	0.0007127	0.74	0.85	-0.6116	-0.5037	15	65714805	65830040	217	13	54162	-0.7	0.75838	-	1
1241	LTB4R	NP_858043.1	1.09	7.61	5.53	4.93e-08	7.52e-07	1.06	7.61	3.41	0.000685729	0.002791	2.03	0.0423288	+-+++-	0.0795016	1	1.14	1.04			14	24760705	24807242	111	17	54162	0.05	0.48097	+	1
151903	CCDC12	NP_653317.1	0.93	8.63	-5.53	4.94e-08	7.53e-07	0.96	8.63	-2.5	0.0128342	0.0356426	2.76	0.00584496	++?+++	0.0145352	1	1.16	1.06			3	46943220	47043500	125	13	54162	-0.37	0.64398	-	1
28958	CCDC56	NP_001035521.1	0.92	8.7	-5.53	5.02e-08	7.65e-07	0.93	8.7	-4.51	7.76e-06	5.22e-05	-6.08	1.19e-09	--?---	3.53e-08	2.8e-05	0.58	0.83	-0.6854	-0.5167	17	40929636	40970743	13	8	54162	0.17	0.43092	-	1
64427	TTC31	NP_071937.3	1.07	8.11	5.52	5.06e-08	7.71e-07	1.1	8.11	6.93	1.17e-11	3.33e-10	5.21	1.93e-07	++?+++	2.13e-06	0.00454516	1.25	1.12	0.6457	0.531	2	74690200	74741691	41	5	54162	-0.25	0.5995	+	1
79709	GLT25D1	NP_078932.2	1.09	9.13	5.52	5.13e-08	7.81e-07	1.15	9.13	7.61	1.18e-13	5.39e-12	6.75	1.43e-11	++++++	1.02e-09	3.36e-07	1.54	1.16	0.7163	0.5806	19	17646511	17713968	190	30	54162	0.89	0.18548	+	1
5230	PGK1	NP_000282.1	1.09	10.5	5.52	5.14e-08	7.81e-07	0.95	8.62	-2.63	0.00872489	0.025602	-3.84	0.000124799	------	0.000521583	1	0.46	0.79		-0.4611
353514	LILRA5	NP_067073.1	1.16	10.43	5.52	5.16e-08	7.85e-07	1.14	10.43	4.39	1.35e-05	8.55e-05	5.13	2.92e-07	?+?++-	3e-06	0.00686095	1.26	1.11			19	54798353	54844409	101	15	54162	1.81	0.035397	-	1	Yes
1052	CEBPD	NP_005186.2	1.14	11.33	5.52	5.17e-08	7.85e-07	1.05	11.33	1.76	0.0792843	0.161927	7.16	7.85e-13	++?+++	1.1e-10	1.85e-08	2.76	1.64	0.6714	0.5094	8	48629476	48670726	19	5	54162	0.18	0.42691	-	1
51499	TRIAP1	NP_057483.1	0.94	7.19	-5.52	5.18e-08	7.86e-07	0.95	7.19	-3.98	7.67e-05	0.000405943	-2.36	0.0181021	--+---	0.0385539	1	0.69	0.92			12	120861764	120904215	99	14	54162	1.42	0.078459	-	1
54623	PAF1	NP_061961.2	1.09	8.24	5.52	5.23e-08	7.93e-07	1.13	8.24	7.47	3.15e-13	1.32e-11	3.14	0.00167265	+-+++-	0.0048956	1	1.16	1.04			19	39856269	39901835	77	13	54162	0.08	0.46718	-	1
2357	FPR1	NP_002020.1	1.17	12.39	5.52	5.25e-08	7.96e-07	1.08	12.39	2.49	0.0129318	0.0358655	4.65	3.4e-06	-+++++	2.38e-05	0.0799579	1.81	1.25			19	52229023	52275150	190	36	54162	1.99	0.023067	-	1
3916	LAMP1	NP_005552.2	1.11	10.37	5.51	5.34e-08	8.08e-07	1.16	10.37	7.11	3.45e-12	1.13e-10	-0.33	0.74153	+-+--+	0.811132	1	1.16	0.99			13	113931436	113997746	33	3	54162	-0.7	0.75905	+	1
9804	TOMM20	NP_055580.1	0.91	7.8	-5.51	5.34e-08	8.09e-07	0.89	7.8	-6.4	3.21e-10	6.43e-09	-6.18	6.49e-10	------	2.16e-08	1.53e-05	0.49	0.73	-0.6599	-0.5149	1	235252656	235312256	114	10	54162	-1.49	0.93249	-	1	Yes
51010	EXOSC3	NP_057126.2	0.93	7.91	-5.51	5.38e-08	8.13e-07	0.89	7.91	-7.5	2.5e-13	1.07e-11	-2.72	0.00649465	-+?---	0.0158872	1	0.76	0.9			9	37759711	37805089	102	11	54162	-1.49	0.93128	-	1
5184	PEPD	NP_000276.2	1.08	8.66	5.51	5.38e-08	8.13e-07	1.07	8.66	4.38	1.44e-05	9.05e-05	0.31	0.759414	-+?+--	0.825096	1	0.9	0.98			19	33857855	34032799	648	38	54162	1.91	0.027862	-	1
26275	HIBCH	NP_932164.1	0.94	7.31	-5.51	5.43e-08	8.2e-07	0.93	7.31	-5.94	4.98e-09	7.49e-08	0.45	0.654411	+++---	0.739982	1	1.26	1.07			2	191049355	191204771	388	11	54162	-0.47	0.68031	-	1
25946	ZNF385A	NP_056296.1	1.09	7.55	5.51	5.5e-08	8.29e-07	1.12	7.55	6.57	1.16e-10	2.59e-09	2.61	0.00911956	-+++++	0.0213219	1	1.37	1.06			12	54742913	54805083	59	14	54162	-0.63	0.73435	-	1	Yes
128308	MRPL55	NP_852127.1	0.93	7.18	-5.51	5.55e-08	8.36e-07	0.93	7.18	-4.67	3.75e-06	2.74e-05	-5.31	1.1e-07	--?--+	1.34e-06	0.00257953	0.74	0.87	-0.6555	-0.5522	1	228274380	228317037	49	9	54162	-0.17	0.56925	-	1
5473	PPBP	NP_002695.1	0.82	8.69	-5.51	5.55e-08	8.36e-07	0.82	8.69	-4.85	1.6e-06	1.27e-05	3.84	0.000120829	?+-++-	0.000507065	1	1.63	1.22			4	74832156	74873907	65	6	54162	-0.79	0.78638	-	1
64216	TFB2M	NP_071761.1	0.93	7.22	-5.51	5.56e-08	8.38e-07	0.89	7.22	-7.28	1.1e-12	4.02e-11	-3.18	0.00146086	--?---	0.004355	1	0.83	0.9			1	246683863	246749565	269	24	54162	-0.33	0.62878	-	1	Yes
29803	REPIN1	NP_055189.1	1.09	8.97	5.51	5.57e-08	8.38e-07	1.1	8.97	5.3	1.69e-07	1.71e-06	3.06	0.00224976	+++++-	0.00637025	1	1.41	1.13			7	150045361	150091133	127	13	54162	1.41	0.079953	+	1
51172	NAGPA	NP_057340.2	1.08	8.01	5.51	5.6e-08	8.41e-07	1.11	8.01	6.91	1.34e-11	3.76e-10	-1.87	0.0611777	--?---	0.108495	1	0.91	0.96			16	5054845	5103942	133	20	54162	1.2	0.11438	-	1
8357	HIST1H3H	NP_003527.1	1.1	7.32	5.5	5.62e-08	8.44e-07	1.1	7.32	4.76	2.51e-06	1.91e-05	1.85	0.0641874	???++?	0.11293	1	1.11	1.06			6	27757842	27798314	73	14	54162	0.39	0.34656	+	1	Yes
80223	RAB11FIP1	NP_001002814.1	1.13	11.18	5.5	5.66e-08	8.5e-07	1.09	11.18	3.34	0.000882026	0.00347196	-2.34	0.0191541	+-?--+	0.0405266	1	1.12	1			8	37696465	37777015	45	11	54162	0.76	0.22313	-	1
8751	ADAM15	NP_997078.1	1.13	9.26	5.5	5.76e-08	8.63e-07	1.16	9.26	6.11	1.88e-09	3.13e-08	1.1	0.269586	?-?+++	0.372001	1	1.1	1.03			1	155003748	155055252	68	17	54162	0.83	0.20363	+	1
58486	ZBED5	NP_067034.2	0.88	7.83	-5.5	5.8e-08	8.68e-07	0.83	7.83	-6.95	9.99e-12	2.89e-10	-2.67	0.00754319	--?--?	0.0180892	1	0.73	0.9			11	10854251	10899620	109	17	54162	-0.07	0.52727	-	1	Yes
92335	LYK5	NP_001003786.1	1.08	8.71	5.5	5.8e-08	8.68e-07	1.06	7.22	6.38	3.69e-10	7.32e-09	-4.23	2.29e-05	--?---	0.000120704	0.5381	0.85	0.93			17	61760192	61839330	125	7	54162	1.06	0.14365	-	1
2956	MSH6	NP_000170.1	0.94	7.66	-5.5	5.82e-08	8.7e-07	0.94	7.66	-4.79	2.16e-06	1.67e-05	4.2	2.7e-05	+++++-	0.000139052	0.634633	1.34	1.14	0.609	0.4887	2	47990221	48054092	157	18	54162	1.18	0.11925	+	1	Yes
23163	GGA3	NP_054720.1	1.08	7.72	5.5	5.9e-08	8.82e-07	1.09	7.72	5.64	2.67e-08	3.3e-07	-0.81	0.416655	+-----	0.525199	1	2.13	1.1			17	73212694	73278444	102	9	54162	-0.51	0.69625	-	1
4676	NAP1L4	NP_005960.1	0.92	9.84	-5.49	5.95e-08	8.89e-07	0.95	9.84	-3.23	0.00129739	0.00487486	4.22	2.45e-05	++?+++	0.000127841	0.57567	1.26	1.12			11	2945660	3033607	248	22	54162	1.35	0.088959	-	1
2033	EP300	NP_001420.2	1.1	8.1	5.49	6.05e-08	9.04e-07	1.1	8.1	5.17	3.21e-07	3.04e-06	4.02	5.82e-05	++?+++	0.000270868	1	1.69	1.17		0.4885	22	41468614	41596081	177	16	54162	2.5	0.006233	+	1
9961	MVP	NP_059447.2	1.08	7.82	5.49	6.08e-08	9.07e-07	1.14	9.84	6.46	2.27e-10	4.73e-09	4.48	7.38e-06	+-++++	4.61e-05	0.173689	1.47	1.17			16	29811715	29879360	54	4	54162	0.52	0.30242	+	1	Yes
56925	LXN	NP_064554.2	0.93	7.24	-5.49	6.14e-08	9.15e-07	0.9	7.24	-6.7	5.06e-11	1.24e-09	-2.13	0.0331898	--?--+	0.0647184	1	0.86	0.97	-0.4821	-0.4079	3	158364203	158410482	151	8	54162	-0.58	0.71898	-	1
654341	TBC1D3G	NP_001035372.1	1.06	7.22	5.49	6.19e-08	9.22e-07	1.06	7.22	5.23	2.38e-07	2.33e-06
4515	MTCP1	NP_055036.1	0.94	7.56	-5.49	6.21e-08	9.23e-07	0.93	7.56	-5.67	2.34e-08	2.93e-07	2.83	0.00463507	???+++	0.0119	1	1.08	1.05		0.4511
56927	GPR108	NP_001073921.1	1.07	7.84	5.48	6.38e-08	9.49e-07	1.09	7.84	5.85	8.47e-09	1.19e-07	2.14	0.0319858	-+?+++	0.0626562	1	0.78	0.98			19	6709925	6757633	90	21	54162	-1.42	0.92158	-	1
9774	BCLAF1	NP_001070908.1	0.87	8.51	-5.48	6.4e-08	9.51e-07	0.81	8.51	-7.21	1.83e-12	6.42e-11	2.47	0.0136541	+-?+++	0.0302438	1	1.5	1.07			6	136558001	136631783	22	2	54162	-0.13	0.5505	-	1
4987	OPRL1	NP_000904.1	1.1	8.44	5.48	6.41e-08	9.52e-07	1.12	8.44	5.82	1.01e-08	1.39e-07	-3.18	0.00148877	?-+---	0.00442474	1	0.84	0.93		-0.4582	20	62691451	62751996	114	15	54162	-0.48	0.68569	+	1
200316	APOBEC3F	NP_001006667.1	0.93	7.17	-5.48	6.42e-08	9.52e-07	0.95	7.17	-3.72	0.000215721	0.00101994	1.94	0.0527999	--?+++	0.0957003	1	0.88	1.01			22	39416609	39471977	70	5	54162	0.26	0.39803	+	1
5686	PSMA5	NP_002781.2	0.92	9.41	-5.48	6.44e-08	9.55e-07	0.91	9.41	-5.21	2.69e-07	2.59e-06	-5.18	2.24e-07	------	2.42e-06	0.00526715	0.4	0.77	-0.662	-0.5543	1	109921653	109989108	73	6	54162	-0.93	0.82429	-	1
26233	FBXL6	NP_036294.1	1.04	7.04	5.48	6.47e-08	9.59e-07	1.06	7.26	5.62	3.03e-08	3.69e-07	0.52	0.604339	+-?++-	0.697234	1	1.09	1			8	145559088	145602183	47	7	54162	-0.08	0.53248	-	1
79034	C7orf26	NP_076972.2	1.07	8.66	5.48	6.48e-08	9.6e-07	1.1	8.66	6.6	9.2e-11	2.12e-09	-0.26	0.793675	-++---	0.851892	1	1.19	0.99			7	6609681	6668357	164	15	54162	0.9	0.18518	+	1
114881	OSBPL7	NP_665741.1	1.08	7.83	5.48	6.57e-08	9.72e-07	1.12	7.83	7.15	2.73e-12	9.09e-11	4.37	1.22e-05	++?+++	7.05e-05	0.286395	1.6	1.16		0.4437	17	45864733	45919169	163	24	54162	0	0.49932	-	1
9528	TMEM59	NP_004863.2	0.89	9.64	-5.47	6.68e-08	9.87e-07	0.84	9.64	-6.86	1.84e-11	4.98e-10	-2.15	0.0317782	-+----	0.0623014	1	0.52	0.89			1	54477346	54539135	103	14	54162	-0.83	0.79677	-	1
7332	UBE2L3	NP_937800.1	1.09	8.25	5.47	6.7e-08	9.89e-07	1.15	8.25	7.5	2.46e-13	1.06e-11	2.9	0.00368079	-+?++-	0.00976315	1	0.73	0.98			22	21883736	21998323	108	4	54162	3.49	0.00024316	+	1
90231	KIAA2013	NP_612355.1	1.08	8.56	5.47	6.8e-08	1e-06	1.09	8.56	5.16	3.49e-07	3.27e-06	-1.69	0.0910631	----++	0.151578	1	0.81	0.95			1	11959645	12006485	153	19	54162	1.72	0.042664	-	1
7316	UBC	NP_066289.2	1.07	14	5.47	6.83e-08	1.01e-06	1.04	14	3.15	0.00173397	0.00626122	0.15	0.882016	-+?++-	0.917621	1	0.84	0.97			12	125376192	125419587	96	16	54162	-0.64	0.73782	-	1
30000	TNPO2	NP_038461.2	1.07	8.45	5.47	6.87e-08	1.01e-06	1.1	8.45	7.38	5.75e-13	2.26e-11	0.42	0.674011	+-?+-+	0.756654	1	1.73	1.09			19	12790008	12854838	88	4	54162	-0.3	0.61618	-	1
50619	DEF6	NP_071330.2	1.09	8.96	5.46	7.02e-08	1.03e-06	1.1	8.96	5.1	4.59e-07	4.17e-06	4.39	1.14e-05	?++++?	6.68e-05	0.268699	1.45	1.16			6	35245595	35309548	128	15	54162	-0.06	0.52229	+	1
6638	SNRPN	NP_073717.1	0.93	7.36	-5.46	7.04e-08	1.04e-06	0.93	7.36	-4.37	1.51e-05	9.4e-05	-2.81	0.00501502	+-?--?	0.0127516	1	1.67	1.04		-0.5228	15	25048794	25243730	675	93	54162	1.25	0.10552	+	1	Yes
648210	LOC648210		0.85	8.41	-5.46	7.09e-08	1.04e-06	0.85	8.41	-5.17	3.19e-07	3.02e-06
23309	SIN3B	NP_056075.1	1.06	7.34	5.46	7.1e-08	1.04e-06	1.07	7.34	5.33	1.39e-07	1.42e-06	2.12	0.0338996	+-?+++	0.0658719	1	1.13	1.05			19	16920209	17011166	148	19	54162	-0.98	0.83551	+	1
646144	LOC646144	XP_940389.1	1.08	7.43	5.46	7.31e-08	1.07e-06	1.09	7.43	5.21	2.65e-07	2.56e-06
51604	PIGT	NP_057021.2	1.07	8.06	5.45	7.34e-08	1.08e-06	1.09	8.06	6.56	1.23e-10	2.7e-09	-1.82	0.0685807	+-?--+	0.119348	1	1.22	1.01			20	44024707	44074885	80	14	54162	1.26	0.10399	+	1
9846	GAB2	NP_536739.1	1.14	8.8	5.45	7.4e-08	1.08e-06	1.1	8.8	3.55	0.000417083	0.00181198	0.13	0.894844	-++-++	0.926928	1	1.23	1.04			11	77906336	78148868	343	5	54162	2.4	0.0081098	-	1
114915	TIGA1	NP_443726.1	0.91	8.4	-5.45	7.43e-08	1.09e-06	0.93	8.4	-3.78	0.000171142	0.000830742	-1.16	0.246515	-+?+--	0.345721	1	0.61	0.89													Yes
642334	LOC642334	XP_935976.1	1.05	7.01	5.45	7.48e-08	1.1e-06	1.05	7.01	4.32	1.85e-05	0.000113315
6837	MED22	NP_852468.1	1.08	8.64	5.45	7.54e-08	1.1e-06	1.09	8.64	5.17	3.26e-07	3.07e-06	-1.78	0.0751479	--?--+	0.128816	1	0.95	0.97	-0.4837	-0.4029	9	136187751	136235011	111	12	54162	-0.73	0.76881	-	1
51000	SLC35B3	NP_057032.2	0.93	7.13	-5.45	7.55e-08	1.1e-06	0.91	7.13	-6.45	2.37e-10	4.91e-09	-1.04	0.297832	--+---	0.402943	1	0.74	0.94			6	8393301	8455794	239	14	54162	-0.07	0.52826	-	1
8603	C4orf8	NP_003695.3	1.06	7.5	5.45	7.58e-08	1.11e-06	1.06	7.5	5.46	7.3e-08	8e-07	0.57	0.57132	++?-++	0.669214	1	1.16	1.05			4	2607159	2754302	338	22	54162	1.18	0.11852	+	1
79567	FAM65A	NP_078795.2	1.1	8.68	5.45	7.62e-08	1.11e-06	1.15	8.68	6.95	9.8e-12	2.85e-10	1.47	0.142528	+-+++-	0.220405	1	0.84	1			16	67542717	67600691	58	12	54162	-0.94	0.82594	+	1
160365	CLECL1	NP_742001.1	0.94	6.79	-5.45	7.64e-08	1.12e-06	0.93	6.79	-5.82	1.01e-08	1.39e-07	3.36	0.000779755	???+++	0.00253393	1	1.19	1.14
57187	THOC2	NP_065182.1	0.92	7.59	-5.45	7.67e-08	1.12e-06	0.94	7.59	-3.68	0.000256976	0.00118471	3.86	0.000111162	++?+++	0.000471881	1	2.16	1.24	0.6883	0.5344
57190	SEPN1	NP_996809.1	1.09	7.96	5.45	7.7e-08	1.12e-06	1.12	7.96	6.51	1.68e-10	3.6e-09	2.34	0.0190343	?-?+++	0.0402948	1	1.11	1.04			1	26106667	26164713	113	8	54162	-0.43	0.66527	+	1
6737	TRIM21	NP_003132.2	1.11	8.82	5.44	7.79e-08	1.13e-06	1.07	8.82	3.2	0.00147323	0.00545121	5.21	1.9e-07	-+?+++	2.1e-06	0.00445901	1.23	1.1	0.5994	0.483	11	4386127	4434926	229	18	54162	0.15	0.43842	-	1	Yes
2011	MARK2	NP_004945.3	1.12	8.13	5.44	7.79e-08	1.13e-06	1.13	8.13	5.17	3.25e-07	3.06e-06	-2.54	0.0112016	?-?---	0.0254789	1	0.9	0.94			11	63586400	63698492	140	11	54162	3.66	0.00012571	+	1
654364	NME1-NME2	NP_001018146.1	0.9	9.08	-5.44	7.85e-08	1.14e-06	0.9	9.08	-4.69	3.5e-06	2.58e-05										17	49210897	49269105	174	21	54162	0.41	0.34248	+	1
8906	AP1G2	NP_003908.1	1.08	8.26	5.44	7.89e-08	1.15e-06	1.12	8.26	6.99	7.89e-12	2.37e-10	4.42	9.67e-06	++-+++	5.83e-05	0.227584	1.28	1.14	0.5913		14	24008777	24058754	48	11	54162	0.07	0.47118	-	1
9123	SLC16A3	NP_004198.1	1.13	10.48	5.44	7.97e-08	1.16e-06	1.11	10.48	3.98	7.78e-05	0.000410871	4.72	2.38e-06	++?+++	1.77e-05	0.0560672	1.27	1.14			17	80166282	80217375	76	7	54162	0.44	0.33027	+	1
64174	DPEP2	NP_071750.1	1.13	10.22	5.44	8.04e-08	1.17e-06	1.11	10.22	4.16	3.63e-05	0.000206498	-0.5	0.619908	???+-+	0.710597	1	0.95	0.99			16	68001293	68054493	61	8	54162	-1.01	0.84449	-	1
22904	SBNO2	NP_055778.2	1.11	8	5.44	8.1e-08	1.17e-06	1.09	8	4	7.12e-05	0.000378782	6.16	7.33e-10	++?+++	2.37e-08	1.73e-05	1.52	1.18	0.6535	0.4634	19	1087633	1194282	277	34	54162	0.83	0.20386	-	1
6687	SPG7	NP_003110.1	1.09	8.94	5.43	8.45e-08	1.22e-06	1.11	8.94	6.15	1.49e-09	2.54e-08	-1.49	0.137147	++---+	0.2136	1	3.06	1.23			16	89554802	89644174	240	12	54162	1.55	0.061114	+	1
23595	ORC3L	NP_862820.1	0.95	7.18	-5.43	8.46e-08	1.22e-06	0.93	7.18	-6.32	5.24e-10	9.88e-09	-5.09	3.5e-07	------	3.49e-06	0.00823239	0.67	0.87		-0.4527	6	88279785	88397172	254	15	54162	0.82	0.20723	+	1
219771	CCNY	NP_659449.3	1.09	9.53	5.43	8.56e-08	1.24e-06	1.05	9.53	2.86	0.00443644	0.0142383	-3.47	0.000524776	--+---	0.00179816	1	0.67	0.91			10	35515953	35880848	489	24	54162	2.39	0.0083629	+	1
8237	USP11	NP_004642.2	1.06	7.37	5.43	8.58e-08	1.24e-06	1.11	7.37	7.95	1.02e-14	6.11e-13	-5.4	6.77e-08	--?---	9.09e-07	0.0015928	0.71	0.84	-0.6287	-0.5741											Yes
535	ATP6V0A1	NP_005168.2	1.12	9.04	5.43	8.59e-08	1.24e-06	1.16	9.04	5.99	3.73e-09	5.79e-08	-2.92	0.00350347	--?---	0.00936142	1	0.82	0.9		-0.4831	17	40590862	40694597	125	14	54162	1.47	0.07081	+	1
84276	NICN1	NP_115692.1	1.07	7.93	5.43	8.6e-08	1.24e-06	1.08	7.93	5.93	5.41e-09	8.01e-08	-3.74	0.000187086	--?---	0.000738006	1	0.78	0.89		-0.5033	3	49439766	49486777	65	8	54162	-0.15	0.56015	-	1
1601	DAB2	NP_001334.2	1.09	7.52	5.43	8.6e-08	1.24e-06	1.12	7.52	6.37	3.85e-10	7.56e-09	4.56	5.2e-06	+-?+++	3.42e-05	0.12232	1.27	1.14			5	39351776	39445335	277	21	54162	-0.94	0.82727	-	1
23099	ZBTB43	NP_054726.1	1.06	7.83	5.42	8.64e-08	1.24e-06	1.06	7.83	5.22	2.47e-07	2.4e-06	1.34	0.179347	++?+--	0.266182	1	1.49	1.11			9	129547285	129620489	73	14	54162	0.27	0.39175	+	1
55968	NSFL1C	NP_057227.2	1.09	8.23	5.42	8.66e-08	1.25e-06	1.06	8.23	3.47	0.000555117	0.00232125	-1.01	0.313112	+++--+	0.419157	1	1.44	1.05	-0.471		20	1402807	1468345	164	22	54162	0.49	0.31275	-	1
10712	C1orf2	NP_006580.2	1.06	7.81	5.42	8.7e-08	1.25e-06	1.08	7.81	5.9	6.09e-09	8.91e-08	1.33	0.184916	-+++-+	0.273174	1	1.17	1.02			1	155196996	155245274	60	4	54162	-0.97	0.83328	-	1
55035	NOL8	NP_060418.4	0.93	7.78	-5.42	8.75e-08	1.26e-06	0.91	7.78	-6.15	1.45e-09	2.49e-08	2.06	0.0393926	++?+++	0.0747747	1	1.1	1.04			9	95039640	95107876	142	12	54162	-0.43	0.66631	-	1	Yes
9632	SEC24C	NP_940999.1	1.08	9.43	5.42	8.83e-08	1.27e-06	1.12	9.43	7.31	9.37e-13	3.51e-11	3.16	0.00156666	++++++	0.00462295	1	1.44	1.09			10	75484039	75551933	68	6	54162	0.98	0.16393	+	1
5034	P4HB	NP_000909.2	1.08	9.59	5.42	8.83e-08	1.27e-06	1.1	9.59	6.03	2.95e-09	4.67e-08	2.03	0.0422588	--?+++	0.0794082	1	0.84	0.99			17	79781034	79838566	88	2	54162	0.53	0.2966	-	1
131474	CHCHD4	NP_653237.1	0.95	7.44	-5.42	8.95e-08	1.28e-06	0.94	7.44	-5.5	5.74e-08	6.5e-07	-1.87	0.061202	-+?---	0.108505	1	0.59	0.89			3	14133577	14186371	102	15	54162	0.49	0.3115	-	1
644846	LOC644846	XP_937535.1	0.96	6.82	-5.42	8.96e-08	1.28e-06	0.96	6.82	-5.14	3.86e-07	3.56e-06
23240	KIAA0922	NP_056011.2	1.07	8.26	5.42	8.98e-08	1.29e-06	1.08	8.26	5.43	8.19e-08	8.89e-07	0.31	0.754873	++?-++	0.821866	1	1.13	1.04			4	154367498	154578760	462	59	54162	0.28	0.39094	+	1	Yes
8798	DYRK4	NP_003836.1	0.94	7.37	-5.42	8.99e-08	1.29e-06	0.94	7.37	-5.17	3.25e-07	3.06e-06	-2.31	0.0208302	------	0.0435249	1	0.64	0.91			12	4651375	4743041	262	27	54162	1.43	0.075889	+	1
8161	COIL	NP_004636.1	0.95	7.44	-5.42	9.07e-08	1.3e-06	0.94	7.44	-5.81	1.04e-08	1.42e-07	-1.32	0.188236	-+++--	0.277327	1	0.7	0.93			17	54995560	55058411	93	15	54162	0.9	0.18453	-	1
149076	ZNF362	NP_689706.2	1.06	8.11	5.41	9.09e-08	1.3e-06	1.07	8.11	5.54	4.69e-08	5.44e-07	-0.62	0.53502	+-+--+	0.636722	1	1.13	1.02			1	33701908	33786321	137	17	54162	-0.12	0.54767	+	1
25865	PRKD2	NP_057541.2	1.1	7.94	5.41	9.1e-08	1.3e-06	1.08	7.24	5.93	5.4e-09	8e-08	5.88	4.08e-09	++?++-	9.22e-08	9.61e-05	1.3	1.15		0.5024	19	47157573	47240384	147	19	54162	3.05	0.0011501	-	1
8443	GNPAT	NP_055051.1	0.94	7.7	-5.41	9.17e-08	1.31e-06	0.92	7.7	-6.61	8.84e-11	2.05e-09	-0.55	0.582054	-+?---	0.678303	1	0.8	0.95			1	231356919	231433719	172	19	54162	0.66	0.25458	+	1
7743	ZNF189	NP_003443.2	0.95	7.08	-5.41	9.2e-08	1.31e-06	0.94	7.08	-6.05	2.7e-09	4.32e-08	1.03	0.302779	-+-++-	0.408204	1	0.67	0.95			9	104141136	104192942	138	16	54162	-0.99	0.83905	+	1	Yes
54816	ZNF280D	NP_001002843.1	0.97	6.76	-5.4	9.67e-08	1.38e-06	0.97	6.76	-4.29	2.1e-05	0.000126678	-1.99	0.0466704	++?--+	0.086299	1	1.3	1.04		-0.4255	15	56902374	57046279	240	18	54162	1.1	0.13497	-	1
55909	BIN3	NP_061158.1	1.08	7.73	5.4	9.68e-08	1.38e-06	1.09	7.73	5.55	4.29e-08	5.02e-07	2.39	0.0169296	++?++?	0.0363594	1	1.11	1.07			8	22457931	22546661	191	15	54162	-1.42	0.92151	-	1
3665	IRF7	NP_004020.1	1.15	9.27	5.4	9.9e-08	1.41e-06	1.15	9.27	4.86	1.54e-06	1.23e-05	6.13	8.86e-10	++?+++	2.77e-08	2.08e-05	1.61	1.25	0.6129	0.4746	11	592555	635999	102	11	54162	-1.04	0.85069	-	1
6146	RPL22	NP_000974.1	0.89	9.62	-5.4	9.91e-08	1.41e-06	0.93	9.62	-3.04	0.00244991	0.00849178	-0.59	0.556065	++?-+-	0.655871	1	1.26	1.03			1	6225080	6279679	113	14	54162	-0.57	0.71602	-	1	Yes
23095	KIF1B	NP_904325.2	1.07	7.15	5.4	9.94e-08	1.41e-06	1.04	7.15	3.2	0.00145481	0.00539005	2.97	0.00302052	++-++-	0.00822031	1	2.15	1.17	0.6087	0.5264	1	10250606	10461664	583	15	54162	0.86	0.19544	+	1	Yes
318	NUDT2	NP_671702.1	0.93	7.47	-5.4	1e-07	1.42e-06	0.93	7.47	-4.88	1.35e-06	1.1e-05	-6.29	3.21e-10	------	1.2e-08	7.55e-06	0.65	0.84		-0.4402	9	34309504	34363711	99	13	54162	0.72	0.23451	+	1
23011	RAB21	NP_055814.1	0.91	7.6	-5.4	1e-07	1.42e-06	0.88	7.6	-6.67	6.14e-11	1.48e-09	-2.88	0.00400578	-+?---	0.0105055	1	0.84	0.94			12	72128658	72201150	129	8	54162	0.05	0.48089	+	1
162989	DEDD2	NP_579874.1	1.11	10.11	5.39	1.02e-07	1.44e-06	1.1	10.11	4.55	6.45e-06	4.44e-05	1.36	0.175163	-++++-	0.261173	1	1.22	1.03		0.4155	19	42682745	42744304	50	3	54162	-0.33	0.62864	-	1
57002	C7orf36	NP_064577.1	0.97	6.75	-5.39	1.02e-07	1.45e-06	0.97	6.75	-5.55	4.48e-08	5.2e-07	-4.74	2.15e-06	--?---	1.62e-05	0.0505946	0.81	0.89	-0.5175	-0.4492	7	39585984	39671681	239	32	54162	-1.14	0.87253	+	1
83442	SH3BGRL3	NP_112576.1	1.12	11.76	5.39	1.02e-07	1.45e-06	1.15	11.76	5.98	3.95e-09	6.1e-08	3.9	9.71e-05	-+?++-	0.000420181	1	1.18	1.05			1	26586213	26628013	134	12	54162	-0.79	0.78567	+	1	Yes
1200	TPP1	NP_000382.3	1.13	9.83	5.39	1.02e-07	1.45e-06	1.2	9.83	7.07	4.51e-12	1.43e-10	2.44	0.0148029	+-?+++	0.0323816	1	1.54	1.12			11	6613997	6660692	91	15	54162	1.36	0.086462	-	1
10799	RPP40	NP_006629.2	0.96	7.19	-5.39	1.03e-07	1.46e-06	0.95	7.19	-4.98	8.33e-07	7.06e-06	-5.36	8.25e-08	--?---	1.07e-06	0.00194052	0.47	0.77	-0.6397	-0.5414	6	4975280	5024292	240	19	54162	-1.07	0.85669	-	1	Yes
6648	SOD2	NP_000627.2	0.97	6.71	-5.39	1.04e-07	1.47e-06	0.97	6.71	-5.2	2.77e-07	2.66e-06	3.55	0.000385239	-+?++?	0.00137866	1	1.48	1.11	0.4952		6	160080148	160134353	130	12	54162	-0.93	0.82286	-	1
8664	EIF3D	NP_003744.1	0.92	9.81	-5.39	1.04e-07	1.47e-06	0.97	9.81	-1.66	0.097985	0.191905	-0.94	0.346889	--?--+	0.454826	1	0.87	0.97			22	36886897	36945277	226	28	54162	0.33	0.37065	-	1	Yes
84034	EMILIN2	NP_114437.2	1.11	8.79	5.39	1.05e-07	1.48e-06	1.13	8.79	5.67	2.29e-08	2.87e-07	5.66	1.51e-08	?+?+++	2.69e-07	0.000356103	1.38	1.19	0.5945	0.4598	18	2826786	2934090	238	55	54162	1.09	0.13759	+	1
58477	SRPRB	NP_067026.2	0.92	8.08	-5.39	1.05e-07	1.48e-06	0.94	8.08	-3.69	0.000248345	0.00114935	-4.9	9.41e-07	--+---	8.06e-06	0.0221431	0.66	0.89			3	133482877	133560336	182	26	54162	-0.69	0.75622	+	1	Yes
27097	TAF5L	NP_055224.1	0.98	6.68	-5.39	1.06e-07	1.5e-06	0.98	6.68	-5.12	4.11e-07	3.77e-06	-1.85	0.0644664	-+?---	0.113345	1	0.83	0.95			1	229708858	229781794	140	16	54162	0.14	0.44371	-	1
347862	PDDC1	NP_872418.1	1.06	7.27	5.38	1.07e-07	1.51e-06	1.08	7.27	6.28	6.67e-10	1.23e-08	1.24	0.216297	+-?+++	0.310867	1	1.73	1.12			11	747222	797501	82	11	54162	0.63	0.26419	-	1
27148	STK36	NP_056505.1	1.06	7.48	5.38	1.07e-07	1.51e-06	1.06	7.48	4.78	2.24e-06	1.73e-05	5.24	1.63e-07	++++++	1.86e-06	0.0038401	1.21	1.12			2	219516749	219587440	75	6	54162	-0.75	0.77438	+	1
9585	MPHOSPH1	NP_057279.2	0.94	7	-5.38	1.07e-07	1.51e-06	0.92	7	-6.57	1.12e-10	2.51e-09	-4.65	3.35e-06	-+?--?	2.35e-05	0.0787622	0.73	0.88			10	91441264	91554700	323	11	54162	-1.62	0.94721	+	1
1662	DDX10	NP_004389.2	0.95	7.25	-5.38	1.09e-07	1.53e-06	0.96	7.25	-3.57	0.000386048	0.00169462	-5.18	2.2e-07	------	2.38e-06	0.00517392	0.54	0.82	-0.5944	-0.4922	11	108515816	108831650	487	21	54162	0.03	0.48676	+	1	Yes
374395	LOC374395	NP_955369.1	1.08	10.48	5.38	1.09e-07	1.54e-06	1.07	10.48	4.43	1.13e-05	7.28e-05	2.91	0.00364216	--++++	0.00967598	1	1.27	1.03		0.4447	11	62534281	62577872	55	8	54162	1.45	0.07369	+	1
9577	BRE	NP_954662.1	1.06	7.82	5.38	1.1e-07	1.54e-06	1.13	8.16	7.67	7.68e-14	3.64e-12	-6.23	4.77e-10	--?--+	1.66e-08	1.12e-05	0.6	0.83	-0.6742	-0.5594	2	28093482	28581768	933	48	54162	0.94	0.17317	+	1
5898	RALA	NP_005393.2	0.9	8.49	-5.38	1.11e-07	1.56e-06	0.88	8.49	-5.96	4.43e-09	6.75e-08	3.3	0.000965098	+++++-	0.00304122	1	1.37	1.09			7	39643152	39767723	251	31	54162	-0.62	0.73202	+	1	Yes
162	AP1B1	NP_663782.1	1.07	7.85	5.37	1.13e-07	1.59e-06	1.07	7.85	4.74	2.69e-06	2.03e-05	-1.18	0.238328	------	0.336479	1	0.93	0.97			22	29703669	29804754	175	21	54162	0.35	0.36164	-	1
7580	ZNF32	NP_001005368.1	0.95	7.16	-5.37	1.15e-07	1.62e-06	0.95	7.16	-4.14	3.98e-05	0.000224237	3.24	0.00118208	-+?++-	0.00362779	1	0.88	1			10	44119307	44164326	128	14	54162	1.05	0.14728	-	1
9793	CKAP5	NP_001008938.1	1.08	8.18	5.37	1.18e-07	1.65e-06	1.12	8.18	6.61	8.62e-11	2.01e-09	-2.69	0.00712663	--?---	0.0172166	1	0.59	0.88			11	46745084	46887859	187	19	54162	0.2	0.42026	-	1
56949	XAB2	NP_064581.2	1.08	8.51	5.37	1.18e-07	1.65e-06	1.13	8.51	7.48	2.84e-13	1.21e-11	1.28	0.200753	--?+++	0.292255	1	1.08	1.02			19	7664411	7714439	105	8	54162	-1.14	0.87271	-	1
55096	FLJ10213	NP_060499.3	1.09	8.13	5.36	1.18e-07	1.66e-06	1.09	8.13	4.7	3.28e-06	2.43e-05	4.99	6.08e-07	+++++-	5.54e-06	0.0142966	1.27	1.13	0.6705	0.5491	3	73090810	73132488	96	8	54162	0.81	0.20957	+	1
51030	FAM18B	NP_057162.4	0.92	7.16	-5.36	1.19e-07	1.66e-06	0.93	6.9	-7.49	2.72e-13	1.16e-11	2.37	0.0180132	++?++?	0.0383957	1	1.26	1.12			17	18664458	18730027	122	13	54162	-0.21	0.58302	+	1
94097	SFXN5	NP_653180.1	1.06	7.19	5.36	1.19e-07	1.66e-06	1.04	7.19	2.8	0.00522044	0.0163857	0.08	0.935864	+-+-++	0.955891	1	1.65	1.08			2	73149165	73318965	218	15	54162	-1.24	0.89193	-	1
645058	LOC645058	XP_935516.1	0.92	9.27	-5.36	1.19e-07	1.67e-06	0.86	9.27	-8.84	1.19e-17	1.42e-15
79169	C1orf35	NP_077295.1	1.05	7.35	5.36	1.2e-07	1.67e-06	1.04	7.35	4.64	4.42e-06	3.17e-05	0.67	0.505579	+++-++	0.610201	1	1.14	1.04			1	228268428	228313112	51	10	54162	-0.13	0.54995	-	1
123920	CMTM3	NP_653202.1	1.08	9.69	5.36	1.2e-07	1.68e-06	1.14	7.81	4.12	4.27e-05	0.000238992	6.38	1.79e-10	++?+++	7.61e-09	4.21e-06	1.65	1.27	0.6907	0.5788	16	66617935	66667795	81	10	54162	-0.9	0.81469	+	1	Yes
201965	RWDD4A	NP_689895.2	0.94	7.2	-5.36	1.21e-07	1.69e-06	0.92	7.2	-6.06	2.51e-09	4.05e-08	2.84	0.00446713	--?++-	0.0115254	1	1.14	1			4	184540789	184600331	194	28	54162	-0.49	0.68737	-	1
64759	TNS3	NP_073585.8	1.08	7.61	5.36	1.22e-07	1.7e-06	1.06	7.61	3.87	0.000120267	0.000604929	2.76	0.00580935	++?+++	0.014465	1	3.04	1.36		0.4233	7	47294752	47641742	822	83	54162	0.62	0.26758	-	1
1054	CEBPG	NP_001797.1	0.93	7.55	-5.36	1.23e-07	1.71e-06	0.89	7.55	-7.34	7.28e-13	2.79e-11	3.2	0.00139246	+++++-	0.00417968	1	1.21	1.11			19	33844575	33893592	187	23	54162	1.05	0.14746	+	1
23223	RRP12	NP_055994.1	1.11	7.83	5.36	1.23e-07	1.71e-06	1.11	7.83	4.65	4.07e-06	2.94e-05	0.97	0.331504	++++-+	0.438392	1	1.13	1.04			10	99096458	99181127	263	11	54162	1.17	0.121	-	1
91050	CCDC149	NP_775734.1	1.06	7.01	5.36	1.24e-07	1.73e-06	1.07	7.01	5.81	1.06e-08	1.45e-07	4.16	3.19e-05	++?++-	0.000160456	0.750774	1.57	1.14		0.4424	4	24787739	25001826	582	47	54162	1.98	0.023869	-	1
652489	LOC652489	XP_947043.1	0.93	8.28	-5.36	1.24e-07	1.73e-06	0.91	8.28	-6.25	7.98e-10	1.45e-08
24146	CLDN15	NP_055158.1	1.07	8	5.35	1.27e-07	1.76e-06	1.1	8	6.53	1.49e-10	3.23e-09	6.13	8.57e-10	?+++++	2.69e-08	2.02e-05	1.74	1.25		0.5085	7	100855373	100902101	131	10	54162	-0.78	0.78114	-	1
6197	RPS6KA3	NP_004577.1	0.93	7.21	-5.35	1.27e-07	1.77e-06	0.93	7.21	-5.14	3.77e-07	3.49e-06	-2.47	0.0133722	-+?---	0.0296916	1	0.79	0.93
25915	C3orf60	NP_951032.1	1.09	10.42	5.35	1.27e-07	1.77e-06	1.1	10.42	5.26	2.02e-07	2.01e-06	-3.39	0.000696642	--?---	0.00230128	1	0.81	0.92			3	49037908	49080928	24	6	54162	0.33	0.37022	+	1
3611	ILK	NP_004508.1	1.08	10.56	5.35	1.29e-07	1.78e-06	1.1	10.56	5.58	3.64e-08	4.34e-07	5.61	2.01e-08	++?+++	3.39e-07	0.000472139	1.09	1.07	0.6039	0.4805	11	6604938	6652105	94	19	54162	1.27	0.10142	+	1	Yes
646567	LOC646567	XP_934596.1	0.91	7.81	-5.35	1.29e-07	1.79e-06	0.88	7.81	-6.66	6.42e-11	1.55e-09
83862	TMEM120A	NP_114131.1	1.08	7.78	5.35	1.3e-07	1.8e-06	1.02	7.78	1.13	0.257284	0.405089	6.62	3.6e-11	++++++	2.1e-09	8.47e-07	1.28	1.12	0.619	0.4966	7	75596155	75643992	93	15	54162	0.03	0.48767	-	1
4542	MYO1F	NP_036467.2	1.14	8.86	5.35	1.31e-07	1.81e-06	1.14	8.86	5.01	7.42e-07	6.39e-06	6.75	1.47e-11	?+?+++	1.04e-09	3.45e-07	1.44	1.23	0.61	0.4802	19	8565674	8662331	199	20	54162	-0.77	0.77864	-	1
902	CCNH	NP_001230.1	0.96	7.16	-5.34	1.32e-07	1.82e-06	0.94	7.02	-5.57	3.93e-08	4.66e-07	-4.28	1.85e-05	-----+	0.000100823	0.435437	0.46	0.81		-0.4693	5	86667310	86728850	62	8	54162	-1.37	0.91511	-	1
25843	PREI3	NP_056202.2	0.97	6.79	-5.34	1.32e-07	1.83e-06	0.96	6.79	-6.47	2.11e-10	4.42e-09	-4.85	1.22e-06	--?--?	1e-05	0.0287072	0.66	0.79			2	198360295	198438423	68	7	54162	-0.06	0.52441	+	1
57583	TMEM181	NP_065874.1	0.86	8.29	-5.34	1.32e-07	1.83e-06	0.82	8.29	-6.37	4e-10	7.81e-09	-1.92	0.0551457	--?--+	0.0993779	1	0.8	0.93			6	158937468	159076467	395	29	54162	-0.32	0.62574	+	1
1072	CFL1	NP_005498.1	1.1	11.66	5.34	1.33e-07	1.84e-06	1.09	11.66	4.66	3.93e-06	2.85e-05	-0.9	0.365661	--?+--	0.474494	1	0.6	0.87	-0.65	-0.5463	11	65602282	65645804	61	9	54162	1.01	0.15682	-	1
7132	TNFRSF1A	NP_001056.1	1.12	10.57	5.34	1.35e-07	1.86e-06	1.13	10.57	5.07	5.42e-07	4.85e-06	7.53	5.17e-14	+-++++	1.4e-11	1.22e-09	1.89	1.41	0.701	0.5242	12	6417923	6471283	73	14	54162	0.18	0.42764	-	1
8178	ELL	NP_006523.1	1.1	8.04	5.34	1.35e-07	1.86e-06	1.06	8.04	2.89	0.00404961	0.0131309	3.72	0.000198466	--?+++	0.000777022	1	1.2	1.05	0.6198	0.5222	19	18533473	18652937	215	12	54162	3.9	4.83e-05	-	0.880461
26048	ZNF500	NP_067678.1	1.06	7.47	5.34	1.38e-07	1.9e-06	1.08	7.47	6.14	1.55e-09	2.63e-08	1.84	0.0660416	++?++-	0.115665	1	1.28	1.08			16	4780815	4837219	177	18	54162	0.72	0.23456	-	1
5571	PRKAG1	NP_002724.1	0.95	7.48	-5.33	1.4e-07	1.93e-06	0.96	7.48	-3.65	0.000289409	0.001314	-6.36	1.99e-10	--?---	8.25e-09	4.69e-06	0.65	0.85	-0.6739	-0.5253	12	49376055	49433012	45	8	54162	-0.24	0.59635	-	1
6601	SMARCC2	NP_620706.1	1.1	8.74	5.33	1.41e-07	1.94e-06	1.16	8.74	7.59	1.37e-13	6.17e-12	2.7	0.00688874	+++++-	0.0167295	1	1.74	1.16			12	56535636	56603351	29	5	54162	0.65	0.25739	-	1
5876	RABGGTB	NP_004573.2	0.94	7.57	-5.33	1.41e-07	1.94e-06	0.92	7.02	-6.98	8.15e-12	2.44e-10	-2.04	0.0413266	--+--?	0.0778741	1	0.47	0.86			1	76231879	76280775	157	19	54162	-0.19	0.57455	+	1	Yes
7726	TRIM26	NP_003440.1	1.09	8.37	5.33	1.43e-07	1.97e-06	1.14	8.37	7.74	4.46e-14	2.23e-12	2.6	0.00939019	--?+++	0.0218655	1	0.85	1.01			6	30132232	30201271	271	23	54162	1.11	0.13413	-	1
9616	RNF7	NP_899060.1	0.89	9.18	-5.33	1.43e-07	1.97e-06	0.87	9.18	-5.79	1.16e-08	1.56e-07	1.67	0.0947526	-+?++-	0.156557	1	0.86	0.97			3	141437051	141485645	107	11	54162	0.46	0.32412	+	1
11252	PACSIN2	NP_009160.1	1.11	10.02	5.33	1.43e-07	1.97e-06	1.09	10.02	3.91	0.000102218	0.000524245	4.9	9.75e-07	-+++++	8.3e-06	0.0229419	1.15	1.06	0.6477	0.528	22	43245772	43431184	518	15	54162	0.3	0.3821	-	1
8723	SNX4	NP_003785.1	0.95	6.89	-5.33	1.44e-07	1.98e-06	0.94	6.89	-5.76	1.39e-08	1.84e-07	-6.69	2.19e-11	------	1.41e-09	5.16e-07	0.75	0.85			3	125145488	125259058	319	22	54162	-1.19	0.88289	-	1
54480	CSGlcA-T	NP_061888.1	1.06	7.35	5.33	1.46e-07	2e-06	1.06	7.35	4.68	3.64e-06	2.67e-05	0.15	0.877519	--?+--	0.913878	1	0.89	0.97	-0.6386	-0.5583	7	150909575	150955913	122	15	54162	0.15	0.43973	+	1
29998	GLTSCR1	NP_056526.2	1.07	7.63	5.32	1.46e-07	2e-06	1.11	7.63	7.22	1.66e-12	5.89e-11	2.95	0.00315268	++?++-	0.00853136	1	1.1	1.04			19	48091453	48226534	342	27	54162	1.54	0.062222	+	1
1434	CSE1L	NP_001307.2	0.93	7.83	-5.32	1.46e-07	2e-06	0.92	7.83	-5.51	5.4e-08	6.15e-07	2.27	0.0233823	-+-++-	0.048051	1	0.68	0.94			20	47642783	47733497	208	15	54162	-0.54	0.70501	+	1
826	CAPNS1	NP_001003962.1	1.11	10	5.32	1.47e-07	2e-06	1.18	10	7.56	1.64e-13	7.3e-12	-2.9	0.00368199	--?---	0.00976413	1	0.53	0.85		-0.4722	19	36610918	36661255	132	28	54162	-0.7	0.75699	+	1	Yes
8884	SLC5A6	NP_066918.1	1.06	7.42	5.32	1.47e-07	2e-06	1.09	7.42	7.48	2.83e-13	1.2e-11	-1.1	0.270491	+-----	0.373074	1	1.11	0.99			2	27402455	27455175	111	9	54162	-1.46	0.92839	-	1
51479	ANKFY1	NP_065791.1	1.08	7.62	5.32	1.47e-07	2.01e-06	1.08	7.62	4.96	9.42e-07	7.91e-06	3.84	0.00012272	++?+++	0.0005139	1	1.2	1.09	0.667	0.5118	17	4046665	4187274	257	13	54162	0.55	0.29072	-	1
25950	RWDD3	NP_056300.2	0.97	6.74	-5.32	1.47e-07	2.01e-06	0.97	6.74	-5.13	4.05e-07	3.72e-06	-1.18	0.23659	++?--+	0.334413	1	1.08	1.01			1	95679711	95732781	139	20	54162	1.19	0.11624	+	1
59345	GNB4	NP_067642.1	0.94	6.98	-5.32	1.48e-07	2.02e-06	0.94	6.98	-5.64	2.71e-08	3.34e-07	3.02	0.00251601	+++++-	0.00700944	1	1.24	1.1			3	179093876	179189371	161	25	54162	1.3	0.096911	-	1
9403	Selenoprotein 15	NP_004252.2	0.87	9.17	-5.32	1.48e-07	2.02e-06	0.82	9.17	-6.99	7.55e-12	2.28e-10	-3.46	0.00054673	++?---	0.00186281	1	0.91	0.97			1	87308128	87400107	183	11	54162	0.62	0.26647	-	1
9141	PDCD5	NP_004699.1	0.94	7.39	-5.32	1.49e-07	2.04e-06	0.93	7.39	-5.92	5.66e-09	8.33e-08	-2.31	0.0209111	--+---	0.0436746	1	0.8	0.95			19	33052071	33098358	129	16	54162	0.55	0.29004	+	1
6238	RRBP1	NP_001036041.1	1.1	8.25	5.32	1.51e-07	2.05e-06	1.15	8.25	7	7.36e-12	2.23e-10	2.54	0.0111961	++?++-	0.0254757	1	1.81	1.18			20	17574323	17682934	235	37	54162	2.8	0.0025246	-	1
23604	DAPK2	NP_055141.2	1.09	7.4	5.32	1.52e-07	2.07e-06	1.08	7.4	4.15	3.9e-05	0.00022013	4	6.32e-05	?+?+++	0.000290893	1	1.05	1.04			15	64179235	64383614	599	34	54162	1.04	0.14998	-	1
8644	AKR1C3	NP_003730.4	0.86	7.51	-5.32	1.52e-07	2.07e-06	0.84	7.51	-5.72	1.72e-08	2.22e-07	5.44	5.18e-08	+++++?	7.36e-07	0.00121933	2.5	1.46	0.6001	0.5261	10	5070958	5169878	475	39	54162	0.83	0.20416	+	1	Yes
8291	DYSF	NP_003485.1	1.22	10.5	5.31	1.56e-07	2.12e-06	1.21	10.5	4.56	6.14e-06	4.25e-05	4.21	2.57e-05	+++++-	0.000133207	0.604361	1.52	1.14			2	71660347	71933895	793	85	54162	0.6	0.27588	+	1	Yes
57459	GATAD2B	NP_065750.1	1.09	8.12	5.31	1.56e-07	2.12e-06	1.1	8.12	5.47	6.72e-08	7.48e-07	1.57	0.116145	++?++-	0.186189	1	1.21	1.06			1	153757201	153915451	225	15	54162	-0.09	0.53597	-	1
11237	RNF24	NP_009150.1	1.17	9.95	5.31	1.58e-07	2.14e-06	1.22	9.95	5.93	5.15e-09	7.7e-08	3.73	0.000192921	+-+++-	0.000757201	1	1.32	1.09	0.6556	0.524	20	3892068	4016216	217	15	54162	-0.18	0.56969	-	1
7100	TLR5	NP_003259.2	1.13	8.23	5.31	1.61e-07	2.19e-06	1.09	8.23	3.24	0.00126907	0.00478782	5.47	4.38e-08	++?+++	6.39e-07	0.00103124	1.52	1.18		0.4493	1	223262748	223336624	166	9	54162	-1.4	0.91985	-	1
157680	VPS13B	NP_060360.3	1.06	7.26	5.3	1.62e-07	2.2e-06	1.07	7.26	5.94	5.11e-09	7.64e-08	-0.5	0.615988	+-?--+	0.707276	1	2.08	1.13			8	100005299	100910447	1331	19	54162	1.4	0.080639	+	1
1975	EIF4B	NP_001408.2	0.91	10.7	-5.3	1.64e-07	2.23e-06	0.95	10.7	-2.58	0.0101068	0.0290464	1.44	0.14935	--?++-	0.228983	1	0.67	0.93			12	53379942	53455993	174	15	54162	1.37	0.085859	+	1	Yes
6122	RPL3	NP_001029025.1	0.86	11.16	-5.3	1.67e-07	2.25e-06	0.89	11.16	-3.52	0.000462174	0.00197916	-1.01	0.311622	--?-+?	0.417685	1	0.77	0.93	-0.5621	-0.5215	22	39688887	39735670	191	22	54162	-0.12	0.54949	-	1
10910	SUGT1	NP_006695.1	0.96	6.98	-5.3	1.67e-07	2.26e-06	0.97	6.98	-3.37	0.000812748	0.00323903	-2.8	0.00513012	-+----	0.0129979	1	0.67	0.91			13	53206830	53282433	186	7	54162	2.91	0.0017803	+	1
124044	SPATA2L	NP_689552.2	1.08	7.59	5.3	1.67e-07	2.26e-06	1.08	7.59	4.85	1.58e-06	1.26e-05	-3.3	0.0009732	+-----	0.00306323	1	1.44	0.98	-0.6508	-0.494	16	89742765	89788131	118	17	54162	-0.75	0.77336	-	1
91662	NLRP12	NP_653288.1	1.1	7.8	5.3	1.68e-07	2.27e-06	1.08	7.8	3.83	0.000141479	0.000698526	1.01	0.313632	???+--	0.419638	1	1.04	1			19	54276838	54347657	253	32	54162	0.79	0.21459	-	1	Yes
60491	NIF3L1	NP_068596.2	0.92	8.12	-5.3	1.68e-07	2.27e-06	0.89	8.12	-6.57	1.15e-10	2.56e-09	-4.17	2.98e-05	-+?---	0.000151271	0.701417	0.49	0.82			2	201734050	201788655	61	10	54162	0.39	0.34838	+	1
4792	NFKBIA	NP_065390.1	1.12	10.92	5.3	1.69e-07	2.28e-06	1.12	10.92	4.57	6.04e-06	4.19e-05	8.28	2.22e-16	++?+++	2.01e-13	5.22e-12	2.38	1.54	0.7472	0.5844	14	35850716	35893960	158	33	54162	0.24	0.40324	-	1
9410	WDR57	NP_004805.1	0.94	8.02	-5.29	1.73e-07	2.34e-06	0.97	8.02	-2.09	0.037005	0.0868398	-2.73	0.00625803	?-+---	0.0153932	1	0.92	0.96			1	31712415	31789644	175	9	54162	0.04	0.48364	-	1
55969	C20orf24	NP_061328.1	1.09	11.43	5.29	1.74e-07	2.35e-06	0.96	10.15	-2.03	0.0425683	0.0975907	-2.8	0.00509104	???---	0.0129254	1	0.9	0.93			20	35214137	35260960	34	11	54162	0.82	0.20519	+	1
28232	SLCO3A1	NP_037404.1	1.09	7.68	5.29	1.75e-07	2.35e-06	1.13	9.06	5.81	1.04e-08	1.42e-07	3.28	0.0010216	++?+++	0.00319362	1	1.97	1.24			15	92376938	92735665	1061	85	54162	-1.38	0.9162	+	1	Yes
648710	LOC648710	XP_942887.1	1.05	6.96	5.29	1.75e-07	2.36e-06	1.06	6.96	5.72	1.73e-08	2.23e-07
3021	H3F3B	NP_005315.1	0.91	8.85	-5.29	1.76e-07	2.36e-06	0.88	8.85	-6.26	7.41e-10	1.35e-08	-0.68	0.494037	??+-+?	0.599119	1	0.92	1.01			17	73752515	73795860	76	13	54162	-0.64	0.73731	-	1
29108	PYCARD	NP_037390.2	1.1	11.1	5.29	1.79e-07	2.4e-06	1.04	11.1	2.19	0.0291843	0.0714411	5.43	5.48e-08	???+++	7.7e-07	0.00129029	1.2	1.13		0.4472	16	31192807	31234097	20	4	54162	2.9	0.0018493	-	1
1453	CSNK1D	NP_001884.2	1.09	8.66	5.28	1.82e-07	2.44e-06	1.08	8.02	4.49	8.75e-06	5.81e-05	0.2	0.843001	--++++	0.889602	1	1.12	1			17	80177523	80251594	75	11	54162	0.67	0.25027	-	1
23492	CBX7	NP_783640.1	1.08	9.01	5.28	1.84e-07	2.46e-06	1.06	9.01	3.72	0.000222967	0.00104831	-4.2	2.63e-05	--?---	0.000135963	0.619038	0.87	0.93			22	39506777	39568661	165	16	54162	-0.55	0.71003	-	1
80709	AKNA	NP_110394.3	1.1	10.29	5.28	1.85e-07	2.48e-06	1.16	10.29	7.44	3.74e-13	1.53e-11	-0.22	0.826683	++?--+	0.877118	1	1.16	1.05			9	117076429	117180783	223	29	54162	1.77	0.038254	-	1
171017	ZNF384	NP_597733.2	1.04	7.23	5.28	1.86e-07	2.49e-06	1.03	7.23	2.88	0.00415922	0.0134385	3.79	0.000149609	?+?+++	0.000610105	1	1.09	1.05	0.6751	0.5492	12	6755643	6818738	52	9	54162	1.57	0.058755	-	1
1520	CTSS	NP_004070.3	1.12	9.44	5.28	1.89e-07	2.52e-06	1.04	9.44	1.41	0.159323	0.282935	5.74	9.38e-09	++?+++	1.83e-07	0.000220594	1.35	1.2			1	150682672	150758433	133	11	54162	-0.21	0.5814	-	1
6194	RPS6	NP_001001.2	0.85	10.61	-5.28	1.89e-07	2.52e-06	0.86	10.61	-4.49	8.62e-06	5.74e-05	5.83	5.62e-09	++++++	1.2e-07	0.00013215	1.54	1.19		0.4576	9	19356253	19400272	67	10	54162	0.92	0.17835	-	1	Yes
84851	TRIM52	NP_116154.1	0.94	7.41	-5.27	1.91e-07	2.55e-06	0.95	7.41	-4.13	4.15e-05	0.00023283	2.48	0.013165	-+?+++	0.0292902	1	1.12	1.04			5	180663373	180708161	108	11	54162	-0.02	0.5086	-	1
55829	SELS	NP_060915.2	0.92	8.68	-5.27	1.92e-07	2.56e-06	0.89	8.68	-6.51	1.68e-10	3.6e-09	1	0.318678	--+++-	0.425157	1	0.91	0.99			15	101791214	101837700	126	15	54162	-0.49	0.68707	-	1
8681	PLA2G4B	NP_005081.1	1.1	8.65	5.27	1.92e-07	2.57e-06	1.14	8.65	6.61	8.89e-11	2.06e-09	2.63	0.0084833	???++?	0.0200273	1	1.1	1.07			15	42100283	42160346	161	19	54162	1.35	0.088207	+	1
154141	MBOAT1	NP_001073949.1	1.06	7.76	5.27	1.94e-07	2.59e-06	1.02	7.76	1.8	0.0723589	0.150594	2.27	0.0233918	?+?+++	0.0480581	1	1.1	1.05			6	20079915	20232695	426	69	54162	2.05	0.020255	-	1	Yes
731486	LOC731486	XP_001133149.1	1.08	7.39	5.27	1.95e-07	2.61e-06	1.09	7.39	5.56	4.22e-08	4.96e-07
7905	REEP5	NP_005660.4	0.86	8.73	-5.27	1.98e-07	2.64e-06	0.79	8.73	-7.46	3.37e-13	1.41e-11	-3.28	0.00104464	--?---	0.00325785	1	0.61	0.83			5	112192081	112278339	232	17	54162	0.67	0.25002	-	1
6605	SMARCE1	NP_003070.3	0.93	7.44	-5.26	1.99e-07	2.66e-06	0.93	7.44	-5.17	3.3e-07	3.1e-06	-3.43	0.000595827	-+?--+	0.00200625	1	0.64	0.89	-0.4921	-0.4102	17	38761214	38825658	97	11	54162	-1.35	0.91107	-	1
6627	SNRPA1	NP_003081.2	0.92	8.71	-5.26	2e-07	2.66e-06	0.91	8.71	-5.6	3.42e-08	4.11e-07	-4.09	4.41e-05	--?--+	0.000212793	1	0.46	0.82			15	101801715	101855481	149	19	54162	-1.37	0.91396	-	1
6773	STAT2	NP_005410.1	1.13	10.3	5.26	2.02e-07	2.69e-06	1.13	10.3	4.52	7.54e-06	5.09e-05	2.83	0.00459953	+-++++	0.0118207	1	1.28	1.08			12	56715381	56774058	41	2	54162	0.91	0.18252	-	1	Yes
4673	NAP1L1	NP_631946.1	0.88	8.48	-5.26	2.02e-07	2.69e-06	0.85	8.48	-5.74	1.54e-08	2.02e-07	3.55	0.000381587	-+++++	0.00136829	1	0.54	0.98		0.513	12	76418672	76498738	84	8	54162	0.64	0.26271	-	1	Yes
10554	AGPAT1	NP_006402.1	1.08	7.66	5.26	2.03e-07	2.69e-06	1.1	7.66	5.96	4.34e-09	6.64e-08	-2.4	0.0164066	--?---	0.0353663	1	0.67	0.87			6	32115983	32165888	120	23	54162	1.29	0.09901	-	1
90007	MIDN	NP_796375.3	1.12	9.28	5.26	2.04e-07	2.71e-06	1.16	9.28	6.07	2.31e-09	3.78e-08	-0.37	0.71421	-+?-++	0.790012	1	0.89	0.99			19	1228552	1279142	38	6	54162	-0.77	0.77927	+	1
55695	NSUN5	NP_683759.1	1.07	7.78	5.26	2.06e-07	2.74e-06	1.1	7.78	6.34	4.75e-10	9.09e-09	-1.52	0.128897	+++-+-	0.202967	1	1.11	1.01			7	72696513	72742864	10	2	54162	-0.28	0.60929	-	1	Yes
124565	SLC38A10	NP_001033073.1	1.07	7.46	5.26	2.09e-07	2.78e-06	1.11	7.46	7.2	1.91e-12	6.66e-11	3.27	0.00108396	++?+++	0.0033644	1	1.21	1.08			17	79198799	79289233	277	31	54162	-0.38	0.64908	-	1
29057	FAM156A	NP_054857.2	1.05	7.58	5.25	2.1e-07	2.78e-06	1.06	7.58	5.19	2.92e-07	2.79e-06	-4.89	1.03e-06	???--?	8.7e-06	0.0242924	0.94	0.94	-0.6058	-0.4892
10121	ACTR1A	NP_005727.1	1.07	8.62	5.25	2.11e-07	2.79e-06	1.12	8.62	7.24	1.49e-12	5.31e-11	-3.85	0.000118553	------	0.000499116	1	0.49	0.84		-0.5024	10	104218986	104282580	175	10	54162	-0.3	0.61695	-	1
11322	TMC6	NP_009198.3	1.1	8.93	5.25	2.12e-07	2.8e-06	1.15	8.93	7.18	2.24e-12	7.67e-11	2.42	0.0155109	++?++-	0.0337125	1	1.59	1.16			17	76088999	76148488	144	31	54162	0.31	0.37642	-	1
29948	OKL38	NP_037502.2	1.07	7.16	5.25	2.13e-07	2.82e-06	1.06	7.16	3.99	7.43e-05	0.000394195	3.74	0.000186357	???+++	0.000735734	1	1.08	1.07			16	83962594	84019937	282	30	54162	0.27	0.39299	+	1
112942	CCDC104	NP_542398.2	0.96	6.9	-5.25	2.14e-07	2.82e-06	0.95	6.9	-5.08	5.24e-07	4.7e-06	-3.66	0.000250138	--+---	0.000951307	1	0.63	0.88		-0.4497	2	55726740	55792216	151	21	54162	0.35	0.36291	+	1
2219	FCN1	NP_001994.2	1.13	12.79	5.25	2.14e-07	2.82e-06	1.11	12.79	3.96	8.4e-05	0.000439865	3.94	8.26e-05	???+++	0.000365499	1	1.23	1.13			9	137777711	137829849	179	31	54162	0.5	0.30847	-	1
55727	BTBD7	NP_060637.1	0.96	6.96	-5.25	2.16e-07	2.85e-06	0.96	6.96	-5.02	6.95e-07	6.03e-06	0.78	0.432721	++?+--	0.541275	1	1.61	1.11			14	93683896	93819385	393	26	54162	-0.56	0.71388	-	1
64393	ZMAT3	NP_689426.1	1.09	8.48	5.25	2.18e-07	2.87e-06	1.12	8.48	6.6	9.69e-11	2.22e-09	-1.23	0.219448	-++---	0.314605	1	0.65	0.95			3	178715011	178810067	179	21	54162	1.37	0.085318	-	1
80233	C17orf70	NP_079437.3	1.08	8.63	5.25	2.2e-07	2.9e-06	1.11	8.63	6.38	3.63e-10	7.21e-09	-3.57	0.000358488	+-?--+	0.00129593	1	1.23	0.99	-0.6314	-0.5346	17	79486911	79539429	129	19	54162	-1.21	0.88778	-	1
64744	SMAP2	NP_073570.1	1.13	12.43	5.25	2.2e-07	2.9e-06	1.09	12.43	3.33	0.000931068	0.00364169	-5.7	1.19e-08	------	2.23e-07	0.000280698	0.54	0.82	-0.6284	-0.539	1	40819378	40908998	201	35	54162	-1.49	0.93143	+	1
54741	LEPROT	NP_059996.1	1.1	9.17	5.24	2.21e-07	2.91e-06	1.1	9.17	4.51	7.79e-06	5.24e-05	2.89	0.00387717	++-++?	0.0102093	1	2.37	1.26			1	65866131	66127242	645	30	54162	0.57	0.28371	+	1
6793	STK10	NP_005981.3	1.09	8.78	5.24	2.24e-07	2.95e-06	1.14	8.78	7.21	1.85e-12	6.48e-11	5.39	6.9e-08	++?+++	9.23e-07	0.0016246	1.2	1.13	0.6031	0.4752	5	171449074	171635346	565	54	54162	-0.98	0.83698	-	1
84304	NUDT22	NP_115720.1	1.05	7.61	5.24	2.25e-07	2.95e-06	1.05	7.61	4.59	5.46e-06	3.82e-05	0.77	0.443136	?-++-+	0.551663	1	1.16	1.02			11	63973730	64017491	72	13	54162	0.71	0.23847	+	1
51311	TLR8	NP_057694.2	1.13	8.7	5.24	2.25e-07	2.95e-06	1.07	8.7	2.54	0.0112036	0.0317892	5.13	2.94e-07	?+?+++	3.03e-06	0.00691864	1.43	1.23
11257	TP53AP1	NP_009164.1	0.97	6.87	-5.24	2.3e-07	3.01e-06	0.97	6.87	-4.97	8.71e-07	7.36e-06	3.75	0.00017393	++?+++	0.00069406	1	1.24	1.1
8621	CDC2L5	NP_003709.3	1.05	8.06	5.24	2.33e-07	3.05e-06	1.04	8.06	4.25	2.5e-05	0.000147976	4.68	2.9e-06	+++++?	2.08e-05	0.0681488	1.78	1.2		0.4675	7	39969959	40156733	294	18	54162	0.2	0.42214	+	1
9220	TIAF1	NP_004731.2	1.1	8.8	5.23	2.33e-07	3.05e-06	1.14	8.8	5.99	3.72e-09	5.78e-08	2.09	0.0369988	++?++?	0.0709175	1	1.18	1.06			17	27380539	27422627	77	11	54162	-0.46	0.6789	-	1
29945	ANAPC4	NP_037499.2	0.92	7.86	-5.23	2.33e-07	3.05e-06	0.9	7.86	-5.7	1.89e-08	2.41e-07	-0.62	0.533084	-+-++-	0.63492	1	0.84	0.96			4	25358848	25440120	225	18	54162	-0.51	0.6954	+	1
339804	LOC339804	XP_291016.1	0.96	6.85	-5.23	2.34e-07	3.06e-06	0.96	6.85	-4.41	1.25e-05	7.99e-05	-3.21	0.00132515	???--?	0.0040042	1	0.81	0.87			2	61352221	61411964	143	9	54162	-0.61	0.72871	+	1
10629	TAF6L	NP_006464.1	1.06	7.38	5.23	2.34e-07	3.07e-06	1.08	7.38	6.56	1.2e-10	2.66e-09	-4.37	1.23e-05	--+---	7.1e-05	0.289185	0.77	0.92	-0.7125	-0.5608	11	62518775	62574814	60	11	54162	1.58	0.056881	+	1
56674	TMEM9B	NP_065695.1	0.92	8.64	-5.23	2.37e-07	3.09e-06	0.89	8.64	-6.6	9.57e-11	2.2e-09	-3.17	0.00154909	+-+---	0.00458089	1	0.88	0.97			11	8948840	9006553	141	11	54162	1.91	0.028226	-	1
29110	TBK1	NP_037386.1	0.9	7.84	-5.23	2.37e-07	3.09e-06	0.86	7.84	-7.09	3.99e-12	1.27e-10	-1.17	0.242697	-+----	0.341527	1	0.63	0.92			12	64825840	64915899	151	20	54162	-0.88	0.81078	+	1
56834	GPR137	NP_064540.2	1.1	8.81	5.23	2.37e-07	3.1e-06	1.18	8.81	7.79	3.12e-14	1.64e-12	2.03	0.0419725	--?++-	0.0789396	1	0.83	0.96			11	64031781	64076972	39	10	54162	0.86	0.1952	+	1
1535	CYBA	NP_000092.2	1.1	12.46	5.23	2.38e-07	3.11e-06	1.08	12.46	3.93	9.47e-05	0.000489003	4.36	1.29e-05	?+-+++	7.37e-05	0.302556	1.37	1.12	0.6015	0.4497	16	88689697	88737492	143	27	54162	0.54	0.29328	-	1
8500	PPFIA1	NP_003617.1	1.08	8.21	5.23	2.39e-07	3.11e-06	1.02	7.11	1.64	0.101916	0.198214	6.43	1.24e-10	++++++	5.69e-09	2.92e-06	2.27	1.27	0.6864	0.5233	11	70096806	70250607	265	8	54162	0.42	0.33656	+	1
116369	SLC26A8	NP_443193.1	1.13	7.52	5.23	2.39e-07	3.11e-06	1.05	7.52	2.06	0.0394629	0.0916251	1.11	0.266053	-+?++-	0.367881	1	0.95	1			6	35891291	36012413	282	27	54162	0.81	0.20787	-	1	Yes
372	ARCN1	NP_001646.2	1.08	9.37	5.23	2.39e-07	3.12e-06	1.1	9.37	5.53	4.8e-08	5.54e-07	-4.31	1.62e-05	------	9.01e-05	0.381304	0.84	0.94			11	118423078	118493748	95	7	54162	0.46	0.32219	+	1
7016	TESK1	NP_006276.2	1.06	7.67	5.23	2.42e-07	3.15e-06	1.11	7.67	8.05	4.77e-15	3.15e-13	1.23	0.219376	+-?++-	0.314579	1	1.24	1.05			9	35585281	35630038	84	12	54162	-0.37	0.64264	+	1
51645	PPIL1	NP_057143.1	0.96	6.9	-5.23	2.44e-07	3.17e-06	0.94	6.9	-6.65	7.01e-11	1.67e-09	1	0.316217	-+-+--	0.42264	1	0.73	0.95			6	36802605	36862800	184	23	54162	-0.18	0.57147	-	1	Yes
825	CAPN3	NP_077320.1	1.06	7.36	5.23	2.44e-07	3.17e-06	1.07	7.36	5.33	1.39e-07	1.43e-06	3.46	0.000533316	++?++?	0.00182159	1	1.74	1.21			15	42626545	42724515	231	12	54162	1.26	0.10391	+	1
6942	TCF20	NP_852469.1	1.06	7.89	5.23	2.44e-07	3.17e-06	1.07	7.89	5.55	4.37e-08	5.09e-07	-0.36	0.71567	++---+	0.790894	1	1.42	1.06		0.4137	22	42536019	42684768	303	19	54162	1.32	0.094044	-	1
9586	CREB5	NP_001011666.1	1.17	9.22	5.22	2.47e-07	3.21e-06	0.87	9.28	-3.9	0.000109577	0.000556346	-1.26	0.208056	-+?-+?	0.300951	1	0.88	0.97			7	28318940	28885511	1588	152	54162	1.64	0.050086	+	1
54476	RNF216	NP_996994.1	1.06	8.24	5.22	2.5e-07	3.25e-06	1.07	8.24	5.35	1.28e-07	1.32e-06	2.91	0.00356159	++?+++	0.00949839	1	1.72	1.15			7	5639672	5841361	617	27	54162	1.57	0.057651	-	1
5411	PNN	NP_002678.2	0.91	8.13	-5.22	2.5e-07	3.25e-06	0.91	8.13	-4.67	3.83e-06	2.79e-05	0.55	0.585591	-+?+++	0.681148	1	0.7	0.97			14	39624387	39672422	104	16	54162	-0.01	0.50474	+	1	Yes
352954	GATS	NP_849153.3	1.09	8.02	5.22	2.54e-07	3.3e-06	1.06	8.02	3.38	0.000763058	0.00305922	-2.2	0.0277387	--???+	0.0554915	1	0.69	0.86			7	99778276	99889855	169	16	54162	3.57	0.00018125	-	1
8878	SQSTM1	NP_003891.1	1.12	10.48	5.22	2.55e-07	3.3e-06	1.12	10.48	4.52	7.42e-06	5.02e-05	4.1	4.12e-05	++?+++	0.000200718	0.969671	1.65	1.22			5	179213388	179285078	175	28	54162	3	0.0013607	+	1
79930	DOK3	NP_079148.1	1.06	7.2	5.22	2.56e-07	3.31e-06	1.05	7.2	3.83	0.000140711	0.000695485	8.3	0	++?+++	0	0	1.38	1.27	0.6124	0.4991	5	176908905	176957490	26	4	54162	3	0.0013402	-	1
55746	NUP133	NP_060700.2	0.95	7.76	-5.22	2.56e-07	3.31e-06	0.96	7.76	-3.94	9.11e-05	0.000472772	-2.54	0.0111506	------	0.0253919	1	0.85	0.93			1	229557044	229664088	170	7	54162	-0.31	0.62089	-	1
313	AOAH	NP_001628.1	1.09	8.28	5.22	2.56e-07	3.31e-06	1.08	8.28	4.07	5.42e-05	0.000296252	4.7	2.58e-06	-+?+++	1.88e-05	0.0606524	0.81	1.06			7	36532549	36784154	623	63	54162	-1.16	0.87746	-	1	Yes
50808	AK3	NP_057366.2	0.92	7.93	-5.22	2.57e-07	3.33e-06	0.91	7.93	-4.92	1.11e-06	9.2e-06	1.86	0.0622343	++-+++	0.110054	1	1.91	1.15			9	4689556	4762043	283	31	54162	-0.83	0.79784	-	1
9184	BUB3	NP_004716.1	0.89	9.68	-5.21	2.59e-07	3.34e-06	0.88	9.68	-5.05	5.86e-07	5.17e-06	2.11	0.0348747	-+?++-	0.0674615	1	0.69	0.96	0.5056		10	124893760	124944886	76	9	54162	-0.77	0.77901	+	1
653158	LOC653158	XP_931907.1	1.13	8.47	5.21	2.59e-07	3.34e-06	1.19	8.47	6.44	2.61e-10	5.35e-09
23401	FRAT2	NP_036215.1	1.14	11.34	5.21	2.6e-07	3.35e-06	1.05	11.34	1.62	0.106274	0.205069	5.78	7.61e-09	++++++	1.53e-07	0.000179124	1.32	1.14	0.5312	0.4516	10	99072254	99114458	109	11	54162	-0.43	0.66548	-	1
6227	RPS21	NP_001015.1	0.92	7.39	-5.21	2.62e-07	3.38e-06	0.88	7.39	-6.91	1.35e-11	3.79e-10	1.61	0.108143	++?++-	0.175068	1	1.46	1.1			20	60942121	60983576	164	16	54162	0.37	0.35694	+	1
11340	EXOSC8	NP_852480.1	0.94	7.41	-5.21	2.63e-07	3.39e-06	0.93	7.41	-5.07	5.47e-07	4.89e-06	-1.14	0.255331	-+----	0.355626	1	1.06	0.99			13	37554678	37603751	54	7	54162	0.03	0.48654	+	1	Yes
10390	CEPT1	NP_001007795.1	0.9	8.18	-5.21	2.64e-07	3.4e-06	0.87	7.58	-7.26	1.29e-12	4.66e-11	4.18	2.86e-05	-+?++-	0.000145908	0.672925	0.84	1.02	0.5082	0.4701	1	111662249	111747724	142	23	54162	-1.3	0.9028	+	1	Yes
80331	DNAJC5	NP_079495.1	1.07	7.66	5.21	2.64e-07	3.4e-06	1.09	7.66	5.93	5.24e-09	7.82e-08	-4.53	5.77e-06	--?--+	3.74e-05	0.135809	0.74	0.87		-0.5204	20	62506455	62587384	182	20	54162	1.14	0.12817	+	1
8943	AP3D1	NP_003929.4	1.06	7.7	5.21	2.66e-07	3.43e-06	1.09	7.7	7.3	9.79e-13	3.64e-11	-3.12	0.0017865	+-?---	0.00519481	1	2.56	1.15			19	2080987	2171556	268	21	54162	-0.22	0.58849	-	1
286451	YIPF6	NP_776195.1	1.1	8.79	5.21	2.67e-07	3.43e-06	1.13	8.79	6.02	3.2e-09	5.04e-08	2.12	0.0343896	+++++-	0.0666822	1	1.44	1.09
79133	C20orf7	NP_077025.2	0.95	7.01	-5.21	2.67e-07	3.43e-06	0.95	7.01	-4.99	7.9e-07	6.75e-06	-5.84	5.35e-09	--?---	1.15e-07	0.000125845	0.58	0.77	-0.6199	-0.458	20	13745672	13819067	185	26	54162	0.1	0.46168	+	1
8675	STX16	NP_001001433.1	1.1	9.66	5.21	2.67e-07	3.43e-06	1.06	9.66	2.83	0.00477444	0.0151975	-2.09	0.0366374	-+?--?	0.070299	1	0.86	0.96			20	57206309	57274582	139	21	54162	-0.55	0.71025	+	1
6001	RGS10	NP_001005339.1	0.85	9.57	-5.21	2.69e-07	3.46e-06	0.89	9.57	-3.32	0.000962581	0.00374628	3.73	0.000191859	?+?+++	0.000753744	1	1.4	1.16			10	121239339	121322222	223	35	54162	1.08	0.13995	-	1
11059	WWP1	NP_008944.1	0.9	7.76	-5.2	2.74e-07	3.51e-06	0.88	7.76	-5.51	5.59e-08	6.35e-07	2.6	0.00937358	-+++--	0.0218377	1	0.73	1.01			8	87334965	87500181	404	19	54162	1.51	0.065897	+	1
9903	KLHL21	NP_055666.2	1.08	7.66	5.2	2.75e-07	3.53e-06	1.07	7.66	4.07	5.39e-05	0.000295308	5.05	4.43e-07	++?++-	4.26e-06	0.0104243	1.46	1.18	0.6217	0.516	1	6630784	6682958	81	15	54162	1.08	0.14071	-	1
57609	DIP2B	NP_775873.2	1.07	7.77	5.2	2.76e-07	3.54e-06	1.04	7.77	2.47	0.0139075	0.0381485	0.34	0.736395	++?-++	0.807352	1	1.23	1.07			12	50878768	51162450	450	18	54162	-1.14	0.87298	+	1
57559	STAMBPL1	NP_065850.1	0.91	7.54	-5.2	2.79e-07	3.57e-06	0.89	7.54	-5.52	5.11e-08	5.85e-07	-4.59	4.37e-06	--?---	2.94e-05	0.102776	0.51	0.8	-0.6191	-0.5282	10	90619597	90755343	304	31	54162	-0.07	0.52878	+	1
9987	HNRPDL	NP_112740.1	0.92	7.43	-5.2	2.83e-07	3.61e-06	0.92	7.43	-4.77	2.35e-06	1.79e-05	-0.4	0.692842	-+-+-+	0.772634	1	0.75	0.97	-0.4765	-0.4387	4	83323717	83371378	111	14	54162	-0.5	0.68974	-	1	Yes
4067	LYN	NP_002341.1	1.13	12.22	5.2	2.83e-07	3.61e-06	1.1	12.22	3.52	0.000464002	0.00198586	5.4	6.62e-08	+++++-	8.97e-07	0.00155773	1.31	1.17			8	56772386	56945006	496	37	54162	1.96	0.025221	+	1
1471	CST3	NP_000090.1	1.12	12.56	5.2	2.84e-07	3.64e-06	1.13	12.56	4.83	1.72e-06	1.36e-05	-0.3	0.767943	+-+-+-	0.831747	1	1.3	1.03			20	23588534	23638685	167	8	54162	1.31	0.094302	-	1
9447	AIM2	NP_004824.1	0.88	7.61	-5.2	2.85e-07	3.64e-06	0.83	7.61	-7.18	2.21e-12	7.59e-11	6.81	9.83e-12	???+++	7.56e-10	2.31e-07	1.23	1.19			1	159008790	159066685	109	10	54162	0.09	0.46293	-	1
55186	SLC25A36	NP_060625.1	0.95	6.97	-5.19	2.89e-07	3.69e-06	0.93	6.97	-6.56	1.23e-10	2.7e-09	-2.12	0.0336358	--?+--	0.0654633	1	0.62	0.85			3	140640662	140718785	155	7	54162	-1.05	0.85368	+	1
84081	CCDC55	NP_115517.1	0.97	6.81	-5.19	2.92e-07	3.72e-06	0.98	6.81	-4.41	1.21e-05	7.76e-05	0.95	0.342075	++?++-	0.449566	1	1.14	1.04			17	28423821	28533493	143	7	54162	1.81	0.035268	+	1
23526	HMHA1	NP_036424.2	1.09	8.72	5.19	2.95e-07	3.77e-06	1.14	8.72	6.78	3.06e-11	7.87e-10	6.73	1.72e-11	++?+++	1.17e-09	4.05e-07	1.4	1.2	0.6489	0.5032	19	1045922	1106627	221	39	54162	5.53	1.6e-08	+	0.000291664
57210	SLC45A4	XP_938889.2	1.14	8.66	5.19	2.97e-07	3.79e-06	1.17	8.66	5.48	6.31e-08	7.09e-07	2.49	0.012677	++?++-	0.0283654	1	1.3	1.08			8	142197273	142330241	399	46	54162	-1.15	0.87406	-	1
473	RERE	NP_001036147.1	1.1	9.18	5.19	2.98e-07	3.8e-06	1.1	9.18	4.28	2.24e-05	0.000134117	3.16	0.00157157	++-+++	0.00463396	1	1.2	1.07			1	8392464	8897699	669	26	54162	1.42	0.078422	-	1
113	ADCY7	NP_001105.1	1.05	7.76	5.19	3.01e-07	3.83e-06	1.04	7.76	3.49	0.000524829	0.00221085	1.97	0.0490949	-+?+++	0.089934	1	0.83	1.02			16	50258830	50372046	216	36	54162	-0.45	0.67245	+	1
116461	C1orf19	NP_443197.1	0.92	7.37	-5.19	3.01e-07	3.83e-06	0.89	7.37	-6.78	3.06e-11	7.87e-10	-2.56	0.0105728	-+---+	0.0242238	1	0.64	0.91			1	184000811	184063346	89	15	54162	-0.55	0.71017	+	1
146542	ZNF688	NP_001019854.1	1.04	7.28	5.18	3.03e-07	3.85e-06	1.05	7.28	5	7.74e-07	6.64e-06	1.95	0.0506539	++?++-	0.0923702	1	1.3	1.07			16	30560998	30605243	23	9	54162	1.93	0.026944	-	1
836	CASP3	NP_116786.1	0.88	7.62	-5.18	3.03e-07	3.85e-06	0.83	7.62	-7.01	6.75e-12	2.07e-10	-0.65	0.512902	++?---	0.616688	1	1.31	1.04			4	185528850	185590629	130	14	54162	-1.4	0.91943	-	1
7428	VHL	NP_937799.1	1.09	9.61	5.18	3.05e-07	3.87e-06	1.11	9.61	5.79	1.14e-08	1.54e-07	-0.35	0.725844	?-+--+	0.79891	1	1.5	1.07			3	10163319	10215354	175	17	54162	-0.51	0.69606	+	1
649555	LOC649555	XP_950672.1	0.94	7	-5.18	3.06e-07	3.88e-06	0.93	7	-5.87	7.43e-09	1.06e-07
84514	GHDC	NP_115873.1	1.07	7.85	5.18	3.06e-07	3.88e-06	1.1	7.85	6.81	2.5e-11	6.61e-10	3.18	0.00145824	-+++++	0.00435004	1	1.26	1.03			17	40321105	40366550	16	9	54162	-1.15	0.87568	-	1
51111	SUV420H1	NP_057112.3	0.94	7.51	-5.18	3.09e-07	3.92e-06	0.93	7.51	-5.31	1.55e-07	1.57e-06	-3.9	9.58e-05	--?---	0.000415179	1	0.49	0.81	-0.5315	-0.4813	11	67902330	68001250	155	16	54162	0.37	0.3547	-	1
134266	GRPEL2	NP_689620.2	0.92	7.4	-5.18	3.1e-07	3.92e-06	0.9	7.4	-5.85	8.45e-09	1.19e-07	-3.79	0.00014897	--?---	0.000607814	1	0.7	0.85			5	148704364	148754146	78	13	54162	-0.86	0.80457	+	1	Yes
10162	MBOAT5	NP_005759.4	1.08	7.88	5.18	3.15e-07	3.99e-06	1.09	7.88	5.49	6.01e-08	6.77e-07	2.67	0.00750625	+-+++-	0.0180136	1	1.12	1.04
26024	PTCD1	NP_056360.2	1.06	7.6	5.17	3.18e-07	4.03e-06	1.08	7.6	6.43	2.75e-10	5.6e-09	-1.39	0.163706	??---?	0.24697	1	0.97	0.98			7	98994362	99065811	104	9	54162	1.33	0.09173	-	1
147657	ZNF480	NP_653285.1	0.95	6.97	-5.17	3.19e-07	4.03e-06	0.93	6.97	-6.98	8.17e-12	2.44e-10	2.18	0.0292595	?++??-	0.0580747	1	1.29	1.09			19	52780426	52849180	268	27	54162	0	0.49882	+	1	Yes
642197	LOC642197	XP_941447.2	0.95	7.27	-5.17	3.21e-07	4.06e-06	0.93	7.27	-6.15	1.49e-09	2.54e-08
55924	C1orf183	NP_945120.1	1.18	8.35	5.17	3.22e-07	4.07e-06	1.16	8.35	4.28	2.16e-05	0.00012979	-0.31	0.755279	--?+--	0.822054	1	0.8	0.94			1	112244686	112318419	222	28	54162	0.09	0.46612	-	1
79086	C19orf42	NP_077009.2	0.95	7.34	-5.17	3.23e-07	4.07e-06	0.93	7.34	-7.1	3.86e-12	1.24e-10	-3.62	0.000289246	--?---	0.00107791	1	0.57	0.85			19	16721562	16790968	132	19	54162	0.56	0.28859	-	1
64928	MRPL14	NP_115487.2	0.93	7.58	-5.17	3.23e-07	4.07e-06	0.93	7.58	-4.45	1.04e-05	6.77e-05	-3.04	0.00237428	-+?---	0.00666986	1	0.61	0.88		-0.4437	6	44061372	44115191	180	20	54162	-0.64	0.74014	-	1
27034	ACAD8	NP_055199.1	1.05	7.72	5.17	3.26e-07	4.1e-06	1.02	7.72	2.02	0.0438283	0.0998756	-1.02	0.306441	-+?-++	0.412196	1	0.82	0.96			11	134103428	134155749	99	17	54162	-0.64	0.73828	+	1
3620	INDO	NP_002155.1	0.94	6.83	-5.17	3.28e-07	4.13e-06	0.94	6.83	-5.06	5.59e-07	4.98e-06	0.57	0.571628	???++-	0.669407	1	1.01	1.01			8	39751328	39806309	178	17	54162	1.05	0.14623	+	1
51028	VPS36	NP_057159.2	0.89	7.55	-5.17	3.29e-07	4.14e-06	0.86	7.55	-6.35	4.54e-10	8.74e-09	-4.64	3.51e-06	-+?---	2.45e-05	0.0825289	0.54	0.82			13	52966737	53044798	133	7	54162	3.09	0.00099871	-	1
374882	TMEM205	NP_940938.1	1.1	9.27	5.17	3.32e-07	4.17e-06	1.11	9.27	4.77	2.3e-06	1.76e-05	-3.93	8.49e-05	--?--+	0.000373868	1	0.82	0.93			19	11433452	11477065	85	8	54162	-1.37	0.9148	-	1
8890	EIF2B4	NP_056451.3	1.07	8.47	5.17	3.32e-07	4.17e-06	1.08	8.47	5.37	1.15e-07	1.21e-06	3.96	7.46e-05	+++++-	0.000334799	1	1.13	1.05			2	27567219	27613324	50	8	54162	0.41	0.34008	-	1
27173	SLC39A1	NP_055252.2	1.06	8.47	5.17	3.33e-07	4.19e-06	1.05	8.47	3.58	0.000372707	0.00164144	5.88	4.03e-09	+++++-	9.13e-08	9.48e-05	1.48	1.17	0.6507	0.4986	1	153911575	153960660	47	6	54162	-0.2	0.5794	-	1	Yes
55701	FLJ10357	NP_060541.3	1.09	7.46	5.16	3.34e-07	4.19e-06	1.11	7.46	5.55	4.4e-08	5.12e-07	5.52	3.31e-08	++?++-	5.1e-07	0.000779183	3.56	1.42	0.6853	0.5587	14	21518419	21578407	142	31	54162	-0.11	0.54355	+	1	Yes
55122	C6orf166	NP_060534.1	1.1	9.22	5.16	3.35e-07	4.2e-06	1.05	9.22	2.47	0.0139888	0.0383298	-3.75	0.000177696	------	0.000706997	1	0.63	0.85			6	88364578	88431985	141	19	54162	1.01	0.15618	-	1	Yes
51068	NMD3	NP_057022.2	0.93	7.01	-5.16	3.36e-07	4.22e-06	0.92	7.01	-5.78	1.23e-08	1.65e-07	-2.77	0.00561189	-+?---	0.0140596	1	0.66	0.9			3	160919050	160990082	138	14	54162	-1	0.84168	+	1
664	BNIP3	NP_004043.2	0.93	7.42	-5.16	3.4e-07	4.26e-06	0.93	7.42	-4.94	1.03e-06	8.54e-06	-5.32	1.03e-07	------	1.28e-06	0.0024325	0.76	0.86			10	133761204	133815435	137	10	54162	-1.61	0.94635	-	1	Yes
1785	DNM2	NP_004936.2	1.07	7.58	5.16	3.42e-07	4.28e-06	1.08	7.58	5.52	5.03e-08	5.77e-07	3.35	0.000814244	?+?+++	0.00262742	1	1.16	1.08	0.5925		19	10808729	10964169	321	27	54162	-0.05	0.51871	+	1
441193	LOC441193	NP_001013744.1	1.09	7.28	5.16	3.45e-07	4.32e-06	1.14	7.28	6.7	5.08e-11	1.25e-09	0.87	0.386991	???-+?	0.496072	1	1.06	1.03
5973	RENBP	NP_002901.1	1.11	8.64	5.16	3.45e-07	4.32e-06	1.12	8.64	5.19	2.99e-07	2.85e-06	1.14	0.252543	?+?+++	0.352577	1	1.03	1.02
55862	ECHDC1	NP_060949.2	0.94	6.94	-5.16	3.5e-07	4.38e-06	0.92	6.94	-6.38	3.76e-10	7.41e-09	-6.15	7.88e-10	--?---	2.52e-08	1.85e-05	0.55	0.79			6	127589857	127685214	180	14	54162	-0.88	0.81145	-	1
4302	MLLT6	NP_005928.2	1.09	8.68	5.16	3.51e-07	4.38e-06	1.13	8.68	6.63	7.83e-11	1.83e-09	2.85	0.00439848	++?+++	0.0113758	1	1.6	1.14			17	36841873	36906056	77	17	54162	-1.87	0.96903	+	1
4739	NEDD9	NP_892011.2	0.96	6.87	-5.15	3.61e-07	4.5e-06	0.96	6.87	-4.77	2.29e-06	1.76e-05	3.8	0.000146809	+-?+++	0.000600351	1	1.22	1.1	0.5329		6	11163531	11402581	772	81	54162	1.52	0.06483	-	1	Yes
8273	SLC10A3	NP_062822.1	1.06	7.91	5.15	3.62e-07	4.51e-06	1.1	7.91	7.31	9.11e-13	3.43e-11	0.32	0.749377	???-++	0.817319	1	1.06	1.02
79631	EFTUD1	NP_078856.4	0.96	7.04	-5.15	3.62e-07	4.52e-06	0.96	7.08	-4.77	2.33e-06	1.79e-05	0.26	0.798129	--?+--	0.855385	1	0.89	0.96			15	82402561	82575104	475	40	54162	4.19	1.38e-05	-	0.25156
965	CD58	NP_001770.1	0.89	7.64	-5.15	3.64e-07	4.54e-06	0.82	7.64	-7.92	1.24e-14	7.25e-13	4.99	5.97e-07	++?+++	5.47e-06	0.0140507	1.29	1.17		0.5137	1	117037156	117133715	79	9	54162	0.17	0.43262	-	1	Yes
1176	AP3S1	NP_001002924.1	0.94	7.45	-5.15	3.65e-07	4.54e-06	0.89	7.45	-7.87	1.87e-14	1.05e-12	-5.69	1.26e-08	--?---	2.31e-07	0.000295369	0.59	0.85	-0.6356	-0.5091	5	115157303	115269778	185	31	54162	0.62	0.26853	+	1
3425	IDUA	NP_000194.2	1.05	7.19	5.15	3.65e-07	4.54e-06	1.07	7.19	5.99	3.78e-09	5.86e-08	1.61	0.107809	?-?+++	0.174598	1	1.08	1.02			4	960785	1018317	147	26	54162	1.79	0.036707	+	1
55343	SLC35C1	NP_060859.3	1.06	7.61	5.15	3.65e-07	4.54e-06	1.08	7.61	6.1	1.94e-09	3.22e-08	-4.42	9.84e-06	--?---	5.91e-05	0.2316	0.84	0.91	-0.5969	-0.5017	11	45805623	45854568	133	24	54162	2.15	0.015583	+	1
3927	LASP1	NP_006139.1	1.1	11.63	5.15	3.65e-07	4.54e-06	1.1	11.63	4.53	7.33e-06	4.96e-05	-1.12	0.264434	+-+---	0.36603	1	1.37	1.05			17	37006112	37098023	217	43	54162	2.23	0.012859	+	1
8859	STK19	NP_004188.1	1.06	8.17	5.15	3.66e-07	4.55e-06	1.06	8.17	5.09	4.79e-07	4.34e-06	3.49	0.000478658	+--++-	0.00166045	1	1.45	1.06			6	31918952	31969223	83	20	54162	0.95	0.17126	+	1
51031	GLOD4	NP_057164.2	0.93	7.72	-5.15	3.66e-07	4.55e-06	0.91	7.72	-5.71	1.8e-08	2.3e-07	-6.55	5.93e-11	------	3.12e-09	1.39e-06	0.49	0.8	-0.6425	-0.5457	17	642549	705571	149	27	54162	0.21	0.41796	-	1
7570	ZNF22	NP_008894.2	0.9	7.7	-5.15	3.67e-07	4.55e-06	0.86	7.7	-6.48	2e-10	4.2e-09	0.93	0.351194	++?++-	0.459445	1	0.91	1.02			10	45476273	45520777	126	14	54162	0.48	0.31469	+	1	Yes
7263	TST	NP_003303.2	1.11	9.5	5.15	3.68e-07	4.57e-06	1.1	9.5	3.96	8.32e-05	0.000436112	1.11	0.268075	+-+-++	0.370176	1	1.59	1.09			22	37386900	37436224	169	21	54162	-0.49	0.6872	-	1
64411	CENTD3	NP_071926.4	1.15	9.5	5.14	3.75e-07	4.65e-06	1.15	9.5	4.57	6.01e-06	4.18e-05	2.29	0.0221338	+-?+++	0.045854	1	1.14	1.07			5	141012968	141081800	216	48	54162	1.49	0.068698	-	1
7077	TIMP2	NP_003246.1	1.12	8.18	5.14	3.77e-07	4.68e-06	1.12	8.18	4.7	3.25e-06	2.41e-05	4.28	1.83e-05	-+?+++	0.000100085	0.431366	1.23	1.06			17	76829059	76941472	355	30	54162	-0.35	0.6351	-	1
54861	SNRK	NP_060189.2	0.86	9.24	-5.14	3.83e-07	4.75e-06	0.8	9.24	-6.93	1.17e-11	3.33e-10	-4.41	1.04e-05	------	6.21e-05	0.245851	0.83	0.9	-0.6344	-0.4636	3	43308004	43412635	94	17	54162	-0.42	0.66126	+	1
5428	POLG	NP_002684.1	1.07	7.83	5.13	3.91e-07	4.84e-06	1.1	7.83	6.52	1.53e-10	3.29e-09	5.53	3.17e-08	+++++-	4.92e-07	0.000745778	1.45	1.12			15	89839536	89898026	90	7	54162	-0.58	0.71769	-	1
23623	RUSC1	NP_055143.2	1.06	8.11	5.13	3.92e-07	4.85e-06	1.09	8.11	6.94	1.08e-11	3.12e-10	-2.05	0.0407293	---+--	0.0769274	1	0.65	0.9		-0.4559	1	155270640	155320909	29	4	54162	-1.11	0.86663	+	1
402251	LOC402251	XP_377933.3	0.82	10.36	-5.13	3.92e-07	4.85e-06	0.82	10.36	-4.71	3.09e-06	2.31e-05
8926	SNURF	NP_005669.2	0.9	8.49	-5.13	3.98e-07	4.91e-06	0.93	8.49	-3.01	0.00268707	0.00918951	-3.57	0.000360087	???--?	0.00130051	1	0.86	0.87	-0.6266	-0.5188	15	25180070	25243729	120	14	54162	-0.35	0.63797	+	1
642780	LOC642780	XP_937161.1	1.08	7.26	5.13	3.99e-07	4.92e-06	1.09	7.26	5.07	5.51e-07	4.92e-06
23643	LY96	NP_056179.1	0.8	8.2	-5.13	3.99e-07	4.92e-06	0.7	8.2	-7.4	5.09e-13	2.02e-11	5.68	1.33e-08	-+++++	2.42e-07	0.000312092	1.42	1.22	0.4878		8	74883564	74961314	203	18	54162	0.63	0.26576	+	1
11182	SLC2A6	NP_060055.1	1.09	8.09	5.13	4.01e-07	4.94e-06	1.09	8.09	4.78	2.25e-06	1.73e-05	-0.87	0.38387	+----+	0.492958	1	1.25	1.01			9	136316216	136364276	112	19	54162	1.84	0.032986	-	1
28512	NKIRAS1	NP_065078.1	0.96	6.85	-5.13	4.01e-07	4.94e-06	0.96	6.85	-5.49	6.23e-08	7.01e-07	-5.3	1.17e-07	--?---	1.41e-06	0.00274506	0.52	0.76	-0.6386	-0.4817	3	23913552	23978537	142	13	54162	0.18	0.43045	-	1
6836	SURF4	NP_149351.1	1.06	8.65	5.13	4.02e-07	4.95e-06	1.09	8.65	6.82	2.39e-11	6.34e-10	1.22	0.223434	--+++-	0.319347	1	0.74	0.96			9	136208325	136264820	123	9	54162	-0.96	0.83094	-	1
6945	MLX	NP_937847.1	1.05	7.61	5.13	4.03e-07	4.97e-06	1.03	7.61	2.95	0.00336115	0.0111904	2.33	0.0198608	--++++	0.0417897	1	0.87	1			17	40699078	40745221	76	7	54162	0.3	0.38371	+	1
79184	BRCC3	NP_077308.1	0.96	6.88	-5.13	4.06e-07	5e-06	0.95	6.88	-5.73	1.59e-08	2.08e-07	-2.58	0.00987884	--???-	0.0228316	1	0.86	0.9
51290	ERGIC2	NP_057654.2	0.94	7.03	-5.12	4.1e-07	5.04e-06	0.93	7.03	-5.68	2.14e-08	2.7e-07	-0.69	0.492493	-+?---	0.597739	1	0.85	0.97			12	29473579	29554143	187	21	54162	-0.24	0.59613	-	1
5870	RAB6A	NP_002860.2	0.94	7.46	-5.12	4.1e-07	5.04e-06	0.92	7.46	-5.76	1.41e-08	1.87e-07	-5.87	4.37e-09	--?---	9.78e-08	0.000102897	0.74	0.84	-0.6827	-0.5598	11	73366683	73492201	279	20	54162	0.92	0.17868	-	1
5932	RBBP8	NP_976036.1	0.94	7.01	-5.12	4.12e-07	5.06e-06	0.92	7.01	-6.37	3.86e-10	7.56e-09	1.46	0.143773	-+?++-	0.221855	1	1.12	1			18	20493295	20626451	270	13	54162	0	0.49843	+	1
8870	IER3	NP_003888.2	1.09	7.72	5.12	4.13e-07	5.07e-06	1.06	7.72	2.79	0.00545562	0.0170346	5.67	1.47e-08	++?+++	2.64e-07	0.000345843	1.58	1.26		0.4935	6	30690976	30732327	212	24	54162	-0.09	0.53548	-	1
642816	LOC642816	XP_937015.1	1.05	7	5.12	4.17e-07	5.11e-06	1.05	7	4.7	3.29e-06	2.44e-05
10651	MTX2	NP_006545.1	0.94	7	-5.12	4.22e-07	5.17e-06	0.91	7	-6.78	2.96e-11	7.68e-10	-4.95	7.38e-07	--?---	6.51e-06	0.0173611	0.44	0.77		-0.5096	2	177114123	177222753	183	19	54162	0.84	0.20106	+	1
9847	KIAA0528	NP_055617.1	0.89	7.9	-5.12	4.24e-07	5.19e-06	0.85	7.9	-6.39	3.52e-10	7.01e-09	-3.58	0.000343647	-----+	0.00124996	1	0.6	0.87			12	22581511	22717452	166	6	54162	0.1	0.45885	-	1
51363	GALNAC4S-6ST	NP_056976.2	1.14	10.49	5.12	4.24e-07	5.19e-06	1.11	10.49	3.58	0.000376637	0.00165843	0.84	0.403552	+-?+-+	0.512555	1	1.08	1			10	125745669	125873200	206	29	54162	2.75	0.0029675	-	1
284370	ZNF615	NP_940882.2	0.95	7.26	-5.12	4.27e-07	5.22e-06	0.94	7.26	-5.18	3.09e-07	2.93e-06	-0.14	0.887793	-+?++-	0.922082	1	0.75	0.92			19	52474587	52531494	168	16	54162	-0.16	0.56527	-	1
1794	DOCK2	NP_004937.1	1.1	10.33	5.12	4.27e-07	5.22e-06	1.1	10.33	4.55	6.46e-06	4.44e-05	6.32	2.68e-10	?+?+++	1.05e-08	6.31e-06	1.4	1.23			5	169044251	169530386	1447	125	54162	1.03	0.1505	+	1
10198	MPHOSPH9	NP_073619.2	0.96	6.95	-5.12	4.28e-07	5.22e-06	0.96	6.95	-5.35	1.25e-07	1.3e-06	-1.1	0.270385	++?--+	0.37295	1	1.47	1.08			12	123620943	123737785	258	9	54162	2.32	0.010053	-	1	Yes
9159	PCSK7	NP_004707.2	1.09	8.83	5.12	4.28e-07	5.22e-06	1.14	8.83	6.87	1.72e-11	4.68e-10	3.61	0.000310042	+-++++	0.00114382	1	1.23	1.07			11	117055788	117122811	183	28	54162	1.91	0.0283	-	1
11183	MAP4K5	NP_942089.1	0.94	6.99	-5.12	4.3e-07	5.24e-06	0.92	6.99	-6.12	1.8e-09	3e-08	1.15	0.251266	++?-++	0.351211	1	1.38	1.12			14	50865211	51019376	227	24	54162	0.04	0.48526	-	1
54978	C2orf18	NP_060347.2	1.05	7.26	5.12	4.3e-07	5.24e-06	1.06	7.26	5.49	6e-08	6.77e-07	-4.4	1.1e-05	--?---	6.49e-05	0.25928	0.86	0.94			2	26967131	27024099	74	6	54162	0.67	0.25206	+	1
1974	EIF4A2	NP_001958.2	0.86	10.36	-5.11	4.31e-07	5.25e-06	0.84	10.36	-5.26	2.02e-07	2.01e-06	-5.09	3.66e-07	--?---	3.64e-06	0.00862201	0.62	0.8	-0.6014	-0.4674	3	186481361	186527686	74	14	54162	0.89	0.188	+	1	Yes
51593	ARS2	NP_056992.4	1.09	9.57	5.11	4.35e-07	5.29e-06	1.13	9.57	6.33	4.99e-10	9.52e-09	4.22	2.47e-05	+-?++-	0.000128786	0.580696	1.53	1.11		0.4998	7	100452701	100506285	109	10	54162	-0.39	0.65219	+	1
1436	CSF1R	NP_005202.2	1.14	10.11	5.11	4.39e-07	5.34e-06	1.19	10.11	5.94	4.96e-09	7.47e-08	7.3	2.93e-13	++++++	5.19e-11	6.9e-09	1.48	1.3			5	149412854	149512935	249	42	54162	1.18	0.11966	-	1	Yes
80149	ZC3H12A	NP_079355.1	1.06	7.55	5.11	4.4e-07	5.34e-06	1.06	7.55	5.03	6.44e-07	5.63e-06	5.76	8.38e-09	???+++	1.66e-07	0.000197121	1.26	1.14			1	37920119	37969978	116	21	54162	-0.68	0.75051	+	1
645345	CHCHD9	XP_933474.1	0.91	8.76	-5.11	4.45e-07	5.4e-06	0.87	8.76	-6.55	1.31e-10	2.85e-09
5771	PTPN2	NP_536347.1	0.94	7.26	-5.11	4.46e-07	5.41e-06	0.92	7.26	-5.53	4.78e-08	5.53e-07	5.45	5.02e-08	++-+++	7.16e-07	0.001182	2.28	1.19	0.6864	0.4973	18	12765477	12904337	366	29	54162	1	0.15751	-	1
145173	B3GALTL	NP_919299.3	0.97	6.79	-5.11	4.48e-07	5.43e-06	0.97	6.79	-4.45	1.03e-05	6.74e-05	1.29	0.198331	++?+--	0.289409	1	1.1	1.03			13	31754112	31926413	360	21	54162	1.08	0.13992	+	1
60343	FAM3A	NP_068578.1	1.09	8.99	5.11	4.49e-07	5.43e-06	1.14	8.99	7.1	3.64e-12	1.18e-10	2.17	0.0297464	+-++++	0.0588773	1	1.24	1.07
285464	CRIPAK	NP_787114.1	1.12	7.99	5.11	4.51e-07	5.47e-06	1.18	7.99	6.35	4.52e-10	8.71e-09	0.98	0.327732	-+-+++	0.434305	1	0.84	1			4	1365340	1409782	95	10	54162	-0.38	0.64649	+	1
5265	SERPINA1	NP_001002235.1	1.14	11.16	5.1	4.54e-07	5.49e-06	1.14	11.16	4.36	1.56e-05	9.66e-05	6.08	1.21e-09	-+?+++	3.57e-08	2.86e-05	1.49	1.26	0.4788		14	94823084	94877029	231	35	54162	0.74	0.22915	-	1
23207	PLEKHM2	NP_055979.1	1.07	8.96	5.1	4.6e-07	5.57e-06	1.1	8.96	6.12	1.75e-09	2.94e-08	4.42	9.76e-06	++?+++	5.86e-05	0.229607	1.25	1.13			1	15990632	16081264	215	17	54162	0.32	0.37498	+	1
650215	LOC650215		0.95	7.34	-5.1	4.63e-07	5.59e-06	0.94	7.34	-4.9	1.26e-06	1.03e-05
1736	DKC1	NP_001354.1	0.94	8.34	-5.1	4.63e-07	5.59e-06	0.94	8.34	-4.51	7.91e-06	5.31e-05	-0.36	0.716225	??---?	0.791285	1	0.99	0.99													Yes
375260	MGC52000	NP_945181.1	1.08	7.77	5.1	4.64e-07	5.6e-06	1.09	7.77	5.15	3.53e-07	3.29e-06	3.6	0.000321968	???++?	0.00118134	1	1.15	1.11
23244	PDS5A	NP_056015.1	0.93	7.5	-5.1	4.65e-07	5.61e-06	0.91	7.5	-5.88	6.88e-09	9.93e-08	3.88	0.000104971	-+++++	0.000450231	1	0.6	0.99	0.6381	0.5204	4	39804483	39999576	491	34	54162	2.6	0.0046854	-	1
10168	ZNF197	NP_001020026.1	0.97	6.88	-5.1	4.66e-07	5.61e-06	0.97	6.88	-3.71	0.000227861	0.00106779	-4.16	3.24e-05	--?---	0.000162726	0.763024	0.86	0.91			3	44646511	44709963	65	9	54162	1.81	0.035441	+	1
1778	DYNC1H1	NP_001367.2	1.08	7.97	5.1	4.66e-07	5.61e-06	1.12	7.97	6.13	1.68e-09	2.83e-08	-3.92	8.78e-05	--+---	0.000384612	1	0.78	0.9		-0.4756	14	102410865	102537135	228	19	54162	-2.06	0.98018	+	1
27072	VPS41	NP_055211.1	0.93	8.67	-5.1	4.66e-07	5.61e-06	0.91	8.67	-5.46	6.97e-08	7.69e-07	-3.97	7.16e-05	--?--+	0.000322676	1	0.73	0.89			7	38743543	38968800	691	31	54162	-2.4	0.99187	-	1
54811	ZNF562	NP_060126.1	1.07	7.79	5.1	4.67e-07	5.62e-06	1.09	7.79	5.75	1.47e-08	1.93e-07	3.51	0.000440331	++?++-	0.00154503	1	1.43	1.07			19	9739330	9805776	114	7	54162	-0.51	0.69545	-	1
6428	SFRS3	NP_003008.1	0.93	7.44	-5.1	4.7e-07	5.65e-06	0.91	7.44	-5.37	1.18e-07	1.23e-06	-4.43	9.61e-06	-+---+	5.8e-05	0.226198	0.68	0.89			6	36542090	36592244	164	13	54162	-0.68	0.75101	+	1
10549	PRDX4	NP_006397.1	0.93	7.79	-5.1	4.71e-07	5.66e-06	0.92	7.79	-4.93	1.07e-06	8.84e-06	-0.29	0.768091	+++---	0.83183	1	1.18	1.03
83443	SF3B5	NP_112577.1	0.93	9.09	-5.1	4.73e-07	5.69e-06	0.94	9.09	-3.41	0.000702427	0.00285131	-4.53	5.78e-06	-----+	3.74e-05	0.136115	0.83	0.93			6	144396018	144436754	100	18	54162	-0.21	0.58194	-	1
23403	FBXO46	NP_001073938.1	1.05	7.22	5.1	4.74e-07	5.69e-06	1.08	8.03	5.54	4.72e-08	5.47e-07	1.73	0.0828297	++?+++	0.139742	1	1.15	1.05		0.4473	19	46193887	46254151	82	17	54162	5.32	5.25e-08	-	0.000957023
54897	CASZ1	NP_060236.3	1.06	7.6	5.1	4.75e-07	5.7e-06	1.09	7.6	6.74	3.97e-11	9.97e-10	4.04	5.27e-05	-+?++-	0.000248211	1	1.11	1.01		0.4933	1	10676661	10876733	349	63	54162	-0.32	0.62434	-	1
1843	DUSP1	NP_004408.1	1.17	10.86	5.09	4.78e-07	5.73e-06	1.06	10.86	1.55	0.122193	0.229178	5.63	1.82e-08	++++++	3.14e-07	0.000427393	2.47	1.42			5	172175093	172218203	137	27	54162	-1.22	0.88933	-	1
55810	FOXJ2	NP_060886.1	1.1	9.16	5.09	4.84e-07	5.8e-06	1.15	9.16	6.96	9.62e-12	2.82e-10	-3.6	0.000315661	------	0.00116127	1	0.73	0.92
399909	PCNXL3	XP_374898.4	1.07	7.59	5.09	4.85e-07	5.81e-06	1.1	7.59	6.73	4.26e-11	1.06e-09	1.99	0.0464123	?-?+++	0.0858891	1	0.95	1			11	65363686	65424910	84	16	54162	0.89	0.18748	+	1
2314	FLII	NP_002009.1	1.08	8.23	5.09	4.86e-07	5.82e-06	1.12	8.23	6.59	9.96e-11	2.27e-09	4.93	8.34e-07	++++++	7.23e-06	0.0196341	1.28	1.13			17	18128129	18182230	87	11	54162	0.43	0.33241	-	1
10845	CLPX	NP_006651.2	0.95	7.36	-5.09	4.86e-07	5.82e-06	0.93	7.36	-6.11	1.86e-09	3.1e-08	-5.36	8.26e-08	------	1.07e-06	0.00194251	0.85	0.92			15	65422784	65497563	82	11	54162	-0.76	0.77574	-	1
55191	NADSYN1	NP_060631.2	1.06	8.01	5.09	4.89e-07	5.85e-06	1.05	8.01	3.81	0.00015519	0.000760279	2.43	0.0149219	++++++	0.0325996	1	1.34	1.11			11	71144217	71232586	241	14	54162	0.45	0.32669	+	1
155061	ZNF746	NP_689770.3	1.11	9.21	5.09	4.91e-07	5.87e-06	1.07	9.21	3.07	0.00227195	0.00795272	-0.85	0.393897	-+?--+	0.502707	1	0.86	0.99			7	149149884	149214928	82	11	54162	-0.58	0.71845	-	1
387103	C6orf173	NP_001012525.1	0.97	6.82	-5.09	4.91e-07	5.87e-06	0.98	6.82	-3.38	0.00077827	0.00311527	-3.82	0.000132837	--?---	0.000550942	1	0.73	0.87			6	126640660	126690548	40	7	54162	-0.68	0.75276	+	1
10059	DNM1L	NP_036192.1	0.95	7.39	-5.09	4.96e-07	5.92e-06	0.93	7.39	-6.35	4.33e-10	8.37e-09	-5.7	1.23e-08	------	2.27e-07	0.000288447	0.7	0.82	-0.6309	-0.4902	12	32812134	32918584	353	7	54162	-1.06	0.8561	+	1
1432	MAPK14	NP_001306.1	1.07	7.18	5.09	4.98e-07	5.95e-06	1.03	7.18	1.9	0.0585689	0.126812	-4.19	2.82e-05	--?---	0.000144216	0.662816	0.79	0.9			6	35975412	36099013	271	19	54162	1.5	0.067431	+	1	Yes
54865	GPATCH4	NP_872620.1	0.95	7.25	-5.09	4.99e-07	5.95e-06	0.99	6.7	-3.18	0.0015713	0.0057653	-3.78	0.000159448	--?---	0.000643978	1	0.64	0.85	-0.6056	-0.4492	1	156544100	156591288	128	7	54162	-0.16	0.56538	-	1	Yes
128637	TBC1D20	NP_653229.1	1.05	7.59	5.08	5.01e-07	5.97e-06	1.08	7.59	6.74	3.81e-11	9.6e-10	-2.58	0.00980237	++?--+	0.0226794	1	0.87	0.99			20	396124	463187	159	23	54162	0.42	0.33567	-	1
284757	LOC284757	NP_001004305.1	1.12	7.95	5.08	5.02e-07	5.98e-06	1.1	7.95	3.69	0.000244463	0.00113392	2.18	0.0292887	++?+++	0.0581131	1	1.64	1.13
1615	DARS	NP_001340.2	0.92	9.95	-5.08	5.06e-07	6.02e-06	0.94	9.95	-3.26	0.00117718	0.00447883	-0.66	0.506481	+++-++	0.610981	1	1.11	1.03			2	136644252	136763254	113	5	54162	-0.68	0.75264	-	1
55250	ELP2	NP_060725.1	0.95	7.53	-5.08	5.07e-07	6.03e-06	0.96	7.53	-3.53	0.000443435	0.00190861	-3.45	0.000568829	-----+	0.00192889	1	0.82	0.92			18	33689837	33774688	212	19	54162	-0.9	0.81626	+	1	Yes
4924	NUCB1	NP_006175.2	1.12	11.93	5.08	5.17e-07	6.15e-06	1.19	11.93	6.95	1.03e-11	2.97e-10	0.59	0.556782	--+++-	0.656597	1	0.79	0.95			19	49383307	49446540	196	24	54162	-0.28	0.60926	+	1
651612	LOC651612	XP_945887.1	1.12	7.37	5.08	5.18e-07	6.16e-06	1.12	7.37	4.62	4.7e-06	3.36e-05
835	CASP2	NP_116765.2	1.06	7.74	5.08	5.21e-07	6.19e-06	1.07	7.74	5.64	2.75e-08	3.39e-07	0.7	0.485051	++?-++	0.591024	1	1.22	1.07			7	142965308	143024789	45	14	54162	0.33	0.36955	+	1
23228	PLCL2	NP_055999.1	0.95	9.06	-5.07	5.31e-07	6.3e-06	0.95	9.06	-3.77	0.000180892	0.000873594	-4.34	1.42e-05	--?---	8.04e-05	0.334646	0.5	0.78	-0.598	-0.4963	3	16954582	17152098	420	24	54162	0.48	0.3147	+	1
22884	WDR37	NP_054742.2	1.05	7.55	5.07	5.32e-07	6.31e-06	1.04	7.55	3.32	0.000950545	0.00370641	-2.62	0.00873457	-+?--+	0.0205401	1	0.52	0.91			10	1075423	1198237	334	31	54162	-1.75	0.96025	+	1
4706	NDUFAB1	NP_004994.1	0.9	8.5	-5.07	5.4e-07	6.4e-06	0.87	8.5	-6.37	3.81e-10	7.5e-09	-4.8	1.62e-06	------	1.27e-05	0.0381885	0.4	0.77	-0.6465	-0.511	16	23572335	23627639	145	16	54162	1.27	0.10245	-	1
8615	USO1	NP_003706.1	0.91	7.71	-5.07	5.41e-07	6.41e-06	0.87	7.71	-6.56	1.22e-10	2.68e-09	-3.62	0.000296253	--?---	0.00109975	1	0.65	0.87			4	76629829	76755366	264	14	54162	-0.07	0.52918	+	1
8175	SF3A2	NP_009096.2	1.11	9.32	5.07	5.46e-07	6.46e-06	1.19	9.32	7.77	3.76e-14	1.91e-12	1.44	0.149323	--?+++	0.228957	1	1.11	1.02			19	2216816	2268678	106	21	54162	-0.42	0.66167	+	1
6240	RRM1	NP_001024.1	0.92	8.25	-5.07	5.53e-07	6.55e-06	0.93	8.25	-3.83	0.000144645	0.0007123	-3.58	0.000344454	------	0.00125212	1	0.62	0.87			11	4095791	4180116	251	18	54162	-0.8	0.78712	+	1
5883	RAD9A	NP_004575.1	1.06	7.32	5.06	5.54e-07	6.55e-06	1.09	7.32	6.93	1.14e-11	3.26e-10	-0.62	0.537732	-+?-++	0.639194	1	1.1	1.01			11	67139423	67185883	63	10	54162	0.95	0.17007	+	1
22861	NLRP1	NP_127500.1	1.07	7.59	5.06	5.54e-07	6.55e-06	1.07	7.59	4.67	3.8e-06	2.77e-05	-3.01	0.00263856	-+?--?	0.00730874	1	0.85	0.93			17	5384719	5507832	506	18	54162	-1.13	0.87009	-	1
3157	HMGCS1	NP_002121.4	0.94	7.16	-5.06	5.65e-07	6.67e-06	0.92	7.16	-5.98	3.85e-09	5.95e-08	-5.4	6.81e-08	--?---	9.14e-07	0.00160247	0.58	0.78	-0.633	-0.5135	5	43267572	43333614	171	10	54162	-0.4	0.65634	-	1
144363	LYRM5	NP_001001660.2	0.92	7.68	-5.06	5.67e-07	6.69e-06	0.88	7.68	-6.82	2.33e-11	6.21e-10	-2.82	0.00473506	-+?---	0.0121183	1	0.81	0.95			12	25328150	25377949	127	13	54162	-0.06	0.52291	+	1
3490	IGFBP7	NP_001544.1	1.09	7.6	5.06	5.68e-07	6.69e-06	1.04	7.6	2.06	0.039874	0.0924571	5.5	3.74e-08	+++++-	5.63e-07	0.000881055	3.02	1.32			4	57877237	57996551	491	54	54162	0.62	0.26694	-	1	Yes
10955	SERINC3	NP_006802.1	1.1	9.4	5.06	5.68e-07	6.69e-06	1.1	9.4	4.6	5.19e-06	3.65e-05	-6.3	2.89e-10	------	1.11e-08	6.79e-06	0.51	0.78		-0.4461	20	43104864	43170726	85	8	54162	1.52	0.064275	-	1
196549	LOC196549	NP_660336.1	1.05	7.11	5.06	5.7e-07	6.71e-06	1.07	7.11	5.98	4.07e-09	6.26e-08	4.17	3.06e-05	???++?	0.000154685	0.719441	1.13	1.09
23513	SCRIB	NP_056171.2	1.06	7.54	5.06	5.75e-07	6.77e-06	1.08	7.54	5.76	1.36e-08	1.8e-07	4.9	9.69e-07	++?+++	8.26e-06	0.0228058	2.26	1.29	0.6126	0.4833	8	144853090	144917890	90	11	54162	-0.54	0.7067	-	1
6774	STAT3	NP_998827.1	1.12	9.89	5.06	5.77e-07	6.79e-06	1.13	8.72	5.01	7.38e-07	6.36e-06	7.2	5.9e-13	++?+++	8.79e-11	1.39e-08	1.81	1.29	0.6846	0.5114	17	40445342	40560586	224	20	54162	1.08	0.14107	-	1	Yes
9537	TP53I11	NP_006025.2	1.08	7.28	5.06	5.79e-07	6.8e-06	1.08	7.28	4.23	2.76e-05	0.00016162	1.46	0.143826	--?+++	0.221902	1	0.81	0.97			11	44887454	44992919	266	44	54162	0.25	0.40257	-	1	Yes
9080	CLDN9	NP_066192.1	1.06	7.19	5.05	5.86e-07	6.88e-06	1.07	7.19	5.15	3.52e-07	3.29e-06	1.25	0.210253	?+-++-	0.303718	1	1.05	1.01			16	3042457	3084506	75	11	54162	-0.75	0.77277	+	1
23558	WBP2	NP_036610.2	1.12	12.4	5.05	6.05e-07	7.09e-06	1.15	12.4	5.54	4.73e-08	5.48e-07	-4.4	1.1e-05	--?---	6.46e-05	0.257911	0.72	0.88		-0.4804	17	73821780	73871501	116	11	54162	0.78	0.21721	-	1
27439	CECR6	NP_114096.1	1.12	7.64	5.05	6.1e-07	7.15e-06	1.08	7.64	3.23	0.00132007	0.00494539	-6.57	4.96e-11	--?---	2.72e-09	1.17e-06	0.7	0.81	-0.69	-0.5946	22	17577189	17622257	152	26	54162	-0.2	0.57829	-	1
64748	LPPR2	NP_073574.1	1.12	8.2	5.05	6.1e-07	7.15e-06	1.09	8.2	3.65	0.000283208	0.00129048	-1.45	0.147267	----+-	0.226321	1	0.74	0.92			19	11446062	11496374	58	8	54162	-1.37	0.91408	+	1
4831	NME2	NP_001018148.1	0.98	6.8	-5.04	6.17e-07	7.22e-06	0.98	6.8	-3.78	0.000173423	0.000840554	1.21	0.226189	???+-?	0.322378	1	1.04	1.01			17	49222796	49269105	138	18	54162	0.56	0.28622	+	1
11035	RIPK3	NP_006862.2	1.05	7.63	5.04	6.18e-07	7.23e-06	1.05	7.63	4.52	7.69e-06	5.19e-05	2.55	0.0107116	???+++	0.024506	1	1.1	1.05			14	24785227	24829242	160	19	54162	0.02	0.49069	-	1	Yes
8554	PIAS1	NP_057250.1	1.08	9.35	5.04	6.19e-07	7.24e-06	1.08	9.35	4.24	2.64e-05	0.000155372	6.05	1.41e-09	-+-+++	4.06e-08	3.33e-05	0.72	1.02		0.4582	15	68326572	68503797	177	16	54162	2.75	0.0030215	+	1
23274	CLEC16A	NP_056041.1	1.07	8.19	5.04	6.22e-07	7.27e-06	1.1	8.19	6.85	1.89e-11	5.09e-10	-0.76	0.445159	+-?--+	0.553362	1	0.95	0.99			16	11018345	11296046	741	36	54162	3.86	5.74e-05	+	1
641649	TMEM91	NP_001036060.1	1.14	9.37	5.04	6.25e-07	7.31e-06	1.12	9.37	3.86	0.000123966	0.000621909	0.02	0.983747	+-???+	0.988916	1	1.01	1			19	41836873	41909988	112	10	54162	0.31	0.37668	+	1
9416	DDX23	NP_004809.2	1.06	8.29	5.04	6.26e-07	7.31e-06	1.09	8.29	6.38	3.74e-10	7.39e-09	5.52	3.38e-08	-++++-	5.18e-07	0.000796041	1.27	1.04		0.4897	12	49203539	49265957	101	21	54162	-0.64	0.73851	-	1
92667	C20orf72	NP_443097.1	0.94	7.85	-5.04	6.29e-07	7.33e-06	0.94	7.85	-4.67	3.74e-06	2.74e-05	3.1	0.00195659	+++++-	0.00563444	1	1.36	1.11		0.4588	20	17929534	17991765	196	13	54162	0.65	0.258	+	1
94005	PIGS	NP_149975.1	1.05	7.64	5.04	6.34e-07	7.39e-06	1.07	7.64	6.37	4.03e-10	7.84e-09	-3.49	0.000474163	--+---	0.00164631	1	0.89	0.95			17	26860405	26918887	39	12	54162	0.57	0.28547	-	1
653226	LOC653226	XP_932544.1	0.84	8.87	-5.04	6.38e-07	7.43e-06	0.77	8.87	-6.95	9.79e-12	2.85e-10
1387	CREBBP	NP_001073315.1	1.11	9.11	5.03	6.48e-07	7.54e-06	1.1	9.11	4.09	5.02e-05	0.000277264	4.96	7.15e-07	++++++	6.34e-06	0.0168163	1.62	1.16			16	3755055	3950121	134	37	54162	-1.04	0.85071	-	1
54826	FLJ20125	NP_060146.1	0.97	6.77	-5.03	6.49e-07	7.55e-06	0.96	6.77	-6.32	5.21e-10	9.84e-09	-3.83	0.00012669	-+?---	0.000528173	1	0.62	0.87			5	102401704	102475842	206	9	54162	1.19	0.1175	-	1
23246	BOP1	NP_056016.1	1.07	7.92	5.03	6.57e-07	7.64e-06	1.09	7.92	6	3.46e-09	5.4e-08	0.63	0.526685	--+++-	0.629088	1	0.77	0.96			8	145466056	145535120	64	3	54162	0.87	0.19153	-	1
54682	MANSC1	NP_060520.2	1.09	7.3	5.03	6.58e-07	7.64e-06	1.04	7.3	1.83	0.0679385	0.143255	-5.35	8.59e-08	-+----	1.1e-06	0.00202041	0.83	0.91	-0.6447	-0.4911	12	12462195	12523475	233	29	54162	-0.43	0.66599	-	1
51195	RAPGEFL1	NP_057423.1	1.04	6.97	5.03	6.62e-07	7.69e-06	1.03	6.97	3.69	0.000250166	0.00115683	-3.46	0.00053808	+-?--+	0.00183626	1	0.83	0.96		-0.4574	17	38314242	38371906	70	12	54162	1.46	0.072365	+	1
5211	PFKL	NP_002617.3	1.08	7.91	5.03	6.63e-07	7.7e-06	1.14	7.91	7.83	2.5e-14	1.36e-12	-0.06	0.953424	+-?-++	0.967736	1	1.23	1.03			21	45699925	45767261	201	29	54162	0.39	0.35001	+	1
649150	LOC649150		0.87	12.92	-5.03	6.73e-07	7.81e-06	0.86	12.92	-4.7	3.2e-06	2.38e-05
10133	OPTN	NP_001008214.1	0.9	7.96	-5.02	6.79e-07	7.88e-06	0.92	7.96	-3.7	0.00023822	0.00110948	-1.82	0.069501	-+?--+	0.120664	1	0.75	0.92			10	13121425	13200291	176	32	54162	-0.35	0.637	+	1
55113	XKR8	NP_060523.2	1.1	8.73	5.02	6.82e-07	7.91e-06	1.09	8.73	4.06	5.53e-05	0.000301283	5.04	4.68e-07	--+++-	4.47e-06	0.0110116	1.25	1.07	0.651		1	28266504	28314604	96	22	54162	0.79	0.2139	+	1
2023	ENO1	NP_001419.1	1.1	11.56	5.02	6.84e-07	7.92e-06	1.14	11.56	6.03	2.94e-09	4.67e-08	2.28	0.0224552	--+++-	0.0464095	1	0.89	1			1	8901059	8959151	102	12	54162	1.65	0.049762	-	1
9465	AKAP7	NP_057461.1	0.93	6.91	-5.02	6.84e-07	7.92e-06	0.93	7.25	-4.15	3.83e-05	0.000216792	-2.31	0.0210842	-++---	0.0439855	1	0.88	0.98			6	131436826	131624675	431	40	54162	-1.22	0.88819	+	1	Yes
2161	F12	NP_000496.2	1.05	7.01	5.02	6.86e-07	7.94e-06	1.04	7.01	3.64	0.000297422	0.00134529	-2.24	0.0251038	--?--+	0.050957	1	0.63	0.88			5	176809139	176856577	36	9	54162	-0.29	0.61325	-	1
5504	PPP1R2	NP_006232.1	0.9	7.95	-5.02	6.92e-07	8e-06	0.87	7.95	-6.4	3.2e-10	6.4e-09	-5.84	5.08e-09	------	1.11e-07	0.000119649	0.64	0.78		-0.4449	3	195221221	195290224	149	15	54162	0.51	0.30466	-	1
8803	SUCLA2	NP_003841.1	0.94	7.09	-5.02	7.06e-07	8.15e-06	0.93	7.09	-5.09	4.82e-07	4.36e-06	-4.62	3.78e-06	-+----	2.6e-05	0.0890418	0.43	0.77	-0.6132	-0.4661	13	48496791	48632125	501	22	54162	2.46	0.0068919	-	1
10181	RBM5	NP_005769.1	1.07	10.17	5.02	7.07e-07	8.16e-06	1.07	10.17	4.07	5.38e-05	0.000294701	1.03	0.300899	+++--+	0.406135	1	1.9	1.14			3	50106341	50176397	87	10	54162	0.45	0.3249	+	1
10813	UTP14A	NP_006640.2	0.96	7.57	-5.02	7.09e-07	8.18e-06	0.98	7.57	-2.22	0.026865	0.0666528	-4.15	3.34e-05	--+---	0.000166876	0.785984	0.89	0.93													Yes
55048	VPS37C	NP_060436.4	1.1	9.54	5.02	7.09e-07	8.18e-06	1.12	9.54	5.3	1.68e-07	1.7e-06	2.42	0.0154245	++?+++	0.033565	1	1.11	1.04			11	60877728	60948916	152	10	54162	0.18	0.4291	-	1
134145	LOC134145	NP_954584.2	0.97	6.88	-5.02	7.1e-07	8.18e-06	0.96	6.88	-5.55	4.33e-08	5.05e-07	0.33	0.739758	-++++-	0.810095	1	0.82	0.96			5	10205619	10270145	246	26	54162	-0.19	0.57581	-	1
55623	THUMPD1	NP_060206.2	0.91	7.66	-5.02	7.1e-07	8.18e-06	0.88	7.66	-5.72	1.7e-08	2.2e-07	-0.53	0.592895	++?---	0.687402	1	1.51	1.07			16	20712498	20773405	136	11	54162	0.73	0.23374	-	1
10197	PSME3	NP_005780.2	1.06	8.24	5.02	7.11e-07	8.18e-06	1.09	8.24	6.24	8.41e-10	1.52e-08	-1.31	0.190083	--++--	0.279532	1	0.64	0.9			17	40965159	41015777	13	6	54162	-0.71	0.76115	+	1
8940	TOP3B	NP_003926.1	1.07	7.72	5.01	7.11e-07	8.18e-06	1.1	7.72	6.37	3.96e-10	7.74e-09	2.42	0.0156978	?++-++	0.0340778	1	1.28	1.1			22	22291397	22357219	147	17	54162	-0.52	0.70008	-	1
79932	KIAA0319L	NP_079150.3	1.09	8.14	5.01	7.18e-07	8.26e-06	1.06	7.29	4.27	2.33e-05	0.000139148	-2.52	0.0116688	-----+	0.0264159	1	0.87	0.96			1	35879091	36043037	111	7	54162	0.97	0.16507	-	1	Yes
23211	ZC3H4	NP_055983.1	1.07	8.56	5.01	7.27e-07	8.36e-06	1.08	8.56	5.53	5.03e-08	5.77e-07	3.12	0.0017997	++?++-	0.0052261	1	1.23	1.07			19	47547444	47637009	104	10	54162	-0.28	0.60912	-	1
55700	RPRC1	NP_060537.2	1.09	10.45	5.01	7.32e-07	8.41e-06	1.1	10.45	4.99	7.94e-07	6.78e-06	-0.9	0.365969	--+--+	0.474763	1	0.86	0.99			1	36601751	36666450	55	6	54162	-0.06	0.52315	+	1
79576	NKAP	NP_078804.1	0.98	6.69	-5.01	7.34e-07	8.43e-06	0.98	6.69	-3.8	0.000158031	0.000772701	1.96	0.0504652	-++++-	0.0920929	1	0.91	1.01
23580	CDC42EP4	NP_036253.2	1.07	8.11	5.01	7.38e-07	8.47e-06	1.08	8.11	5.38	1.09e-07	1.15e-06	4.37	1.27e-05	++?+++	7.29e-05	0.29857	2.93	1.37		0.4783	17	71259763	71328314	163	27	54162	0.27	0.39468	-	1	Yes
6772	STAT1	NP_644671.1	1.15	11.29	5.01	7.39e-07	8.48e-06	1.1	11.29	3.07	0.00224319	0.0078617	-3.81	0.000137444	-----+	0.000566783	1	0.59	0.88	-0.4758	-0.4293	2	191813762	191898976	172	26	54162	-1.98	0.97635	-	1	Yes
64218	SEMA4A	NP_071762.2	1.15	9.14	5.01	7.41e-07	8.5e-06	1.2	9.14	5.82	9.82e-09	1.36e-07	-3.01	0.00262683	?-----	0.0072794	1	0.82	0.92			1	156097145	156167542	147	20	54162	0.15	0.44162	+	1
56683	C21orf59	NP_067077.1	0.95	7.72	-5	7.62e-07	8.73e-06	0.98	6.93	-2.59	0.00973053	0.0281536	-4.42	1.01e-05	-----+	6.01e-05	0.236587	0.84	0.91	-0.4787	-0.446	21	33953977	34005174	147	20	54162	1.74	0.041299	-	1
4242	MFNG	NP_002396.2	1.07	9.91	5	7.72e-07	8.84e-06	1.07	9.91	4.52	7.59e-06	5.13e-05	4.94	8e-07	++?++-	6.96e-06	0.0188216	1.25	1.11	0.6184	0.5151	22	37845101	37902499	93	12	54162	-0.55	0.70984	-	1	Yes
8726	EED	NP_003788.2	0.96	6.92	-5	7.81e-07	8.94e-06	0.96	6.92	-4.99	7.94e-07	6.78e-06	2.73	0.00625903	-+-++-	0.0153941	1	0.85	1.01	0.4829	0.4763	11	85935586	86009785	149	15	54162	0.82	0.20742	+	1
653506	LOC653506	XP_932862.1	1.1	9.16	4.99	7.92e-07	9.07e-06	1.11	9.16	4.62	4.74e-06	3.38e-05	4.17	3.03e-05	???++?	0.000153674	0.713815	1.27	1.23
1043	CD52	NP_001794.2	0.79	10.6	-4.99	8.05e-07	9.2e-06	0.73	10.6	-5.84	8.94e-09	1.24e-07	0.55	0.58463	???+--	0.680267	1	0.91	0.97			1	26624411	26667014	120	14	54162	1.25	0.10586	+	1
3310	HSPA6	NP_002146.2	1.13	10.41	4.99	8.05e-07	9.2e-06	1.04	10.41	1.56	0.119808	0.225672	3.03	0.00244652	-+?+++	0.00684793	1	1.27	1.12			1	161474036	161516687	92	14	54162	-0.49	0.68735	+	1	Yes
261726	TIPRL	NP_690866.1	0.95	7.51	-4.99	8.12e-07	9.27e-06	0.93	7.51	-6.26	7.68e-10	1.4e-08	-4.46	8.26e-06	--?---	5.09e-05	0.194336	0.75	0.87		-0.4654	1	168128171	168191352	153	15	54162	2.11	0.017605	+	1
3622	ING2	NP_001555.1	0.96	7.06	-4.99	8.16e-07	9.31e-06	0.95	7.06	-6.06	2.49e-09	4.04e-08	-2.58	0.00984121	+-?---	0.0227559	1	1.19	0.97			4	184406220	184453422	106	18	54162	0.31	0.37867	+	1
7584	ZNF35	NP_003411.3	0.97	6.89	-4.98	8.39e-07	9.57e-06	0.97	6.89	-5.14	3.75e-07	3.47e-06	1.55	0.121608	--?++-	0.193353	1	0.85	0.97			3	44670108	44722283	45	8	54162	1.63	0.051712	+	1
6391	SDHC	NP_001030590.1	0.96	7.21	-4.98	8.43e-07	9.6e-06	0.94	7.21	-6.03	3.02e-09	4.77e-08	-3.83	0.000129896	--+---	0.000540199	1	0.66	0.9			1	161264166	161354541	336	12	54162	-0.47	0.68102	+	1
23125	CAMTA2	NP_055914.2	1.03	6.81	4.98	8.6e-07	9.8e-06	1.02	6.81	3.53	0.00045754	0.00196189	-2.09	0.0368186	+-?---	0.070609	1	1.09	0.98			17	4851287	4910960	114	15	54162	2.63	0.004237	-	1
284406	ZNF545	NP_597723.1	0.96	6.96	-4.97	8.69e-07	9.89e-06	0.96	6.96	-4.08	5.24e-05	0.000288219	-1.76	0.0781977	-+?---	0.133092	1	0.7	0.91			19	36862861	36929550	128	12	54162	-1.59	0.9441	-	1
51053	GMNN	NP_056979.1	0.98	6.72	-4.97	8.71e-07	9.91e-06	0.98	6.72	-4.81	1.93e-06	1.51e-05	2.66	0.00785907	+++++-	0.0187512	1	1.24	1.06	0.4929	0.5197	6	24755159	24806327	122	26	54162	0.25	0.39987	+	1
642684	LOC642684	XP_931230.1	1.07	7.09	4.97	8.74e-07	9.94e-06	1.04	7.09	2.71	0.00700596	0.0212005
90075	ZNF30	NP_001092907.1	0.96	6.92	-4.97	8.87e-07	1.01e-05	0.96	6.92	-3.98	7.69e-05	0.000406691	3.28	0.00104771	++?++-	0.00326611	1	1.08	1.04			19	35397807	35456076	151	9	54162	1.26	0.10314	+	1	Yes
131408	FAM131A	NP_653236.2	1.05	7.21	4.97	8.89e-07	1.01e-05	1.02	7.21	1.75	0.0800436	0.163188	-6.18	6.23e-10	+-----	2.08e-08	1.47e-05	1.81	0.98	-0.7414	-0.5937	3	184033717	184084063	91	22	54162	-0.12	0.54896	+	1
762	CA4	NP_000708.1	1.17	8.55	4.97	8.9e-07	1.01e-05	1.07	8.55	1.83	0.0676727	0.142872	-5.14	2.76e-07	-----+	2.87e-06	0.00650262	0.65	0.83	-0.669	-0.5427	17	58207302	58256907	58	8	54162	0.49	0.31033	+	1
284207	METRNL	XP_946559.1	1.1	8.67	4.97	8.97e-07	1.02e-05	1.11	8.67	4.88	1.38e-06	1.12e-05	1.67	0.0948446	+-???+	0.156676	1	1.28	1.11													Yes
147807	ZNF524	NP_694951.1	1.07	8.25	4.97	9.03e-07	1.02e-05	1.09	8.25	5.85	8.25e-09	1.16e-07	4.32	1.54e-05	??++++	8.61e-05	0.361695	1.25	1.1			19	56091730	56134504	102	17	54162	-0.25	0.59678	+	1
5297	PIK4CA	NP_002641.1	1.09	9.09	4.97	9.06e-07	1.03e-05	1.1	9.09	5.08	5.08e-07	4.56e-06	-4.08	4.58e-05	------	0.000219721	1	0.81	0.91	-0.6189	-0.545	22	21041979	21233100	416	12	54162	-0.54	0.70538	-	1
5226	PGD	NP_002622.2	1.13	10.7	4.97	9.1e-07	1.03e-05	1.1	10.7	3.46	0.00057339	0.00238975	-0.43	0.664813	-++--+	0.749045	1	0.65	0.95			1	10438884	10500565	157	16	54162	0.63	0.26435	+	1	Yes
23067	SETD1B	XP_037523.11	1.05	7.32	4.96	9.15e-07	1.04e-05	1.05	7.32	4.79	2.16e-06	1.67e-05	2.37	0.0176434	--?++-	0.0376916	1	1.05	1			12	122221879	122290562	97	11	54162	1.02	0.15429	+	1
5431	POLR2B	NP_000929.1	0.93	7.81	-4.96	9.18e-07	1.04e-05	0.91	7.81	-5.67	2.3e-08	2.88e-07	-2.29	0.0221388	-+----	0.0458602	1	0.63	0.89			4	57824944	57917334	301	27	54162	0.31	0.37657	+	1
197370	NSMCE1	NP_659547.2	0.94	8.04	-4.96	9.21e-07	1.04e-05	0.99	8.04	-0.56	0.577092	0.716633	-1.22	0.223859	--?-++	0.319876	1	0.73	0.93			16	27216315	27300113	146	14	54162	0.94	0.17236	-	1	Yes
10558	SPTLC1	NP_847894.1	0.98	6.73	-4.96	9.27e-07	1.05e-05	0.92	8.31	-4.54	6.76e-06	4.63e-05	-4.42	9.75e-06	-+----	5.86e-05	0.2295	0.79	0.91			9	94773416	94897756	395	24	54162	0.09	0.46517	-	1
6904	TBCD	NP_005984.3	1.1	8.33	4.96	9.27e-07	1.05e-05	1.19	8.33	8.26	1.04e-15	7.79e-14	0.48	0.630309	+-?+-+	0.719401	1	1.31	1.03	-0.5977	-0.497	17	80689938	80921062	740	27	54162	-0.99	0.83849	+	1
23370	ARHGEF18	NP_056133.2	1.09	10.57	4.96	9.4e-07	1.06e-05	1.11	10.57	5.37	1.16e-07	1.22e-06	-0.15	0.877708	+++-++	0.914028	1	1.2	1.06			19	7400481	7557371	508	21	54162	-0.36	0.63896	+	1	Yes
158	ADSL	NP_000017.1	0.93	8.93	-4.96	9.44e-07	1.06e-05	0.94	8.93	-3.88	0.000118578	0.000597643	0.12	0.904028	---++-	0.933423	1	0.61	0.91			22	40722504	40782577	69	7	54162	1.35	0.088924	+	1	Yes
155435	RBM33	NP_001008408.2	1.08	9.22	4.96	9.46e-07	1.07e-05	1.06	9.22	3.29	0.00105417	0.00406514	3.36	0.000777844	++?+++	0.00252869	1	2.46	1.26			7	155417188	155594179	379	11	54162	-0.86	0.80466	+	1
11320	MGAT4A	NP_036346.1	0.95	7.17	-4.96	9.47e-07	1.07e-05	0.92	7.17	-6.81	2.57e-11	6.77e-10	1.41	0.158278	-++++-	0.240356	1	1.09	1.02			2	99215569	99367589	284	23	54162	0.48	0.31446	-	1
9517	SPTLC2	NP_004854.1	1.05	7.31	4.96	9.52e-07	1.07e-05	1.05	7.31	4	7.07e-05	0.000376705	-1.33	0.182907	-+?---	0.27073	1	0.77	0.95			14	77952340	78103110	549	45	54162	0.14	0.44256	-	1
651149	LOC651149	XP_945371.1	0.92	7.35	-4.96	9.54e-07	1.07e-05	0.93	7.35	-3.82	0.000145362	0.000715521
84223	IQCG	NP_115639.1	0.97	6.78	-4.96	9.57e-07	1.08e-05	0.97	6.78	-4.94	1.03e-06	8.55e-06	-2.2	0.0279466	-++---	0.0558283	1	0.61	0.9			3	197595946	197706982	268	15	54162	0.94	0.17248	-	1	Yes
168544	ZNF467	NP_997219.1	1.14	9.47	4.95	9.58e-07	1.08e-05	1.11	9.47	3.53	0.000447059	0.00192259	3.34	0.00084382	++?+++	0.00270837	1	1.14	1.07			7	149441452	149490295	145	23	54162	-0.45	0.67249	-	1
51569	UFM1	NP_057701.1	0.93	7.34	-4.95	9.63e-07	1.08e-05	0.9	7.34	-6.36	4.21e-10	8.15e-09	-2.89	0.00384136	++?---	0.0101218	1	1.16	1.02			13	38903942	38957143	68	3	54162	-0.5	0.6914	+	1	Yes
56905	C15orf39	NP_056307.2	1.14	9.34	4.95	9.76e-07	1.1e-05	1.21	9.34	6.3	6.14e-10	1.14e-08	3.59	0.00032697	--?+++	0.00119689	1	1.07	1.03			15	75471219	75524510	34	9	54162	-1.22	0.88877	+	1
9764	KIAA0513	NP_055547.1	1.11	8.73	4.95	9.8e-07	1.1e-05	1.13	8.73	5.3	1.67e-07	1.69e-06	-4.57	4.81e-06	--?---	3.2e-05	0.113128	0.61	0.82		-0.5086	16	85041374	85147836	525	33	54162	0.33	0.36987	+	1
25936	NSL1	NP_001036014.1	0.91	8.94	-4.95	9.95e-07	1.12e-05	0.87	8.94	-6.59	1.01e-10	2.29e-09	2.72	0.00644245	++?++-	0.0157677	1	1.92	1.18			1	212879495	212985139	428	17	54162	1.88	0.030189	-	1
7378	UPP1	NP_003355.1	1.09	9.35	4.95	9.98e-07	1.12e-05	1.08	9.35	3.94	9.22e-05	0.000477438	5.04	4.75e-07	--++++	4.52e-06	0.0111714	1.41	1.1	0.4864	0.4454	7	48108355	48168330	102	15	54162	-0.95	0.83018	+	1	Yes
55802	DCP1A	NP_060873.3	1.06	7.83	4.94	1.01e-06	1.14e-05	1.09	7.83	7.32	8.51e-13	3.22e-11	-0.74	0.45768	-+?-++	0.564773	1	0.77	0.96			3	53297443	53401654	140	15	54162	-1.02	0.84534	-	1
57714	KIAA1618	XP_946332.2	1.05	6.97	4.94	1.01e-06	1.14e-05	1.04	6.97	3.99	7.38e-05	0.000391694	4.74	2.09e-06	???++?	1.58e-05	0.0492186	1.24	1.2		0.448
11027	LILRA2	NP_006857.1	1.15	10.05	4.94	1.02e-06	1.15e-05	1.06	10.05	1.75	0.0814804	0.165536	6.36	1.97e-10	++?+++	8.17e-09	4.63e-06	1.55	1.23	0.6303	0.5349	19	55064469	55119027	237	14	54162	2.37	0.008941	+	1
152007	C9orf19	NP_071738.1	1.08	11.6	4.94	1.04e-06	1.16e-05	1.04	11.6	2.17	0.0303596	0.073755	-0.13	0.898573	+++-++	0.929382	1	1.27	1.06			9	36116730	36183910	227	34	54162	0.61	0.27028	+	1	Yes
8812	CCNK	NP_003849.2	1.07	9.05	4.94	1.04e-06	1.16e-05	1.06	9.05	3.84	0.000139365	0.000689731	-0.07	0.94788	-+?-++	0.964106	1	0.95	1			14	99927695	99997852	85	9	54162	-0.14	0.55657	+	1
9684	LRRC14	NP_055480.1	1.05	7.27	4.94	1.04e-06	1.16e-05	1.05	7.27	4.02	6.59e-05	0.000353598	2.42	0.015616	++++++	0.0339128	1	1.21	1.08			8	145723349	145770562	32	3	54162	0.2	0.42217	+	1
7871	SLMAP	NP_009090.2	0.91	7.82	-4.94	1.04e-06	1.16e-05	0.85	7.82	-7.3	9.98e-13	3.7e-11	2.53	0.0114764	++?+-+	0.0260179	1	0.87	1.02			3	57721948	57935597	283	19	54162	0.23	0.41006	+	1
3717	JAK2	NP_004963.1	0.93	7.17	-4.94	1.05e-06	1.17e-05	0.9	7.17	-6.3	6.02e-10	1.12e-08	1.2	0.230987	-+?+-+	0.327792	1	1.15	1.01			9	4965245	5149948	422	17	54162	-0.19	0.5758	+	1
115817	DHRS1	NP_612461.1	1.08	8.59	4.94	1.05e-06	1.18e-05	1.11	8.59	5.73	1.66e-08	2.17e-07	-1.27	0.205291	+++--+	0.297885	1	1.07	1.02			14	24739804	24789039	100	13	54162	0.29	0.38491	-	1
55907	CMAS	NP_061156.1	0.93	7.55	-4.93	1.06e-06	1.18e-05	0.92	7.55	-5.22	2.52e-07	2.44e-06	-5.22	1.78e-07	-+----	2e-06	0.00419793	0.49	0.77	-0.6457	-0.5103	12	22179108	22238608	131	15	54162	0.37	0.35691	+	1
57658	CALCOCO1	NP_065949.1	1.06	7.64	4.93	1.06e-06	1.18e-05	1.09	7.64	6.21	1.03e-09	1.82e-08	3.75	0.000175706	-+++++	0.000700266	1	0.76	1.02		0.459	12	54084902	54141307	144	24	54162	1.23	0.10944	-	1	Yes
51246	SHISA5	NP_057563.3	1.1	10.89	4.93	1.06e-06	1.18e-05	1.12	10.89	5.2	2.75e-07	2.64e-06	1.09	0.277891	--++++	0.381314	1	1.09	1.02			3	48489197	48562259	78	10	54162	1.07	0.14315	-	1
8992	ATP6V0E1	NP_003936.1	0.93	11.12	-4.93	1.07e-06	1.2e-05	0.88	10.28	-6.96	9.69e-12	2.83e-10	4.67	3e-06	++-+++	2.13e-05	0.0705756	1.58	1.15	0.6874	0.5873	5	172390763	172481900	192	27	54162	-0.76	0.77726	+	1
9189	ZBED1	NP_004720.1	1.08	9.01	4.93	1.09e-06	1.21e-05	1.06	9.01	3.55	0.000417832	0.00181489	-0.25	0.804416	-+?+--	0.860085	1	0.88	0.98
23253	ANKRD12	NP_056023.3	0.89	7.59	-4.93	1.09e-06	1.22e-05	0.84	7.59	-6.56	1.19e-10	2.64e-09	1.48	0.139678	++?+-+	0.216895	1	2	1.18			18	9116751	9305983	426	22	54162	-0.58	0.71758	+	1
26058	TNRC15	NP_056390.2	1.04	7.39	4.93	1.1e-06	1.22e-05	1.04	7.39	4.51	7.74e-06	5.22e-05	1.88	0.0603619	-++++-	0.107266	1	0.92	1.01			2	233542015	233745287	456	21	54162	0.39	0.3498	+	1
79042	TSEN34	NP_001070914.1	1.11	9.82	4.93	1.1e-06	1.22e-05	1.07	9.82	2.7	0.00711514	0.0214595	0.23	0.821545	--?++-	0.872826	1	0.97	1			19	54674112	54718394	135	17	54162	0.29	0.38502	+	1
5710	PSMD4	NP_002801.1	0.93	9.19	-4.93	1.1e-06	1.22e-05	0.98	9.19	-0.87	0.386422	0.542938	-2.58	0.0097713	--?---	0.0226164	1	0.64	0.89		-0.4417	1	151207176	151259955	52	7	54162	-0.77	0.78031	+	1
56681	SAR1A	NP_064535.1	0.93	7.7	-4.93	1.1e-06	1.22e-05	0.92	7.7	-4.86	1.56e-06	1.24e-05	-1.43	0.153967	--+---	0.234853	1	0.69	0.92			10	71889960	71950285	200	24	54162	0.86	0.19612	-	1
201176	ARHGAP27	NP_954976.1	1.05	7.1	4.93	1.1e-06	1.22e-05	1.02	7.1	1.88	0.0607003	0.130673	3.4	0.000677899	++++++	0.0022463	1	1.54	1.16			17	43451268	43530282	173	11	54162	1.37	0.084857	-	1
25926	NOL11	NP_056277.2	0.93	7.72	-4.92	1.11e-06	1.23e-05	0.91	7.72	-5.39	1.06e-07	1.12e-06	1.55	0.120715	-+?++-	0.19218	1	0.86	0.98			17	65693949	65760319	159	11	54162	-0.75	0.77201	+	1	Yes
83596	BCL2L12	NP_001035758.1	1.05	7.72	4.92	1.12e-06	1.24e-05	1.04	7.72	3.47	0.000556776	0.00232733	3.8	0.000147231	?-?+++	0.000601608	1	1.17	1.06		0.4598	19	50148399	50197173	50	10	54162	-0.89	0.81371	+	1
26036	ZNF451	NP_001026794.1	0.94	7.3	-4.92	1.12e-06	1.24e-05	0.92	7.3	-5.75	1.43e-08	1.89e-07	3.99	6.56e-05	++?+++	0.000299616	1	1.23	1.09			6	56934808	57055103	120	8	54162	0.62	0.26617	+	1
10550	ARL6IP5	NP_006398.1	0.86	9.96	-4.92	1.12e-06	1.24e-05	0.8	9.96	-6.55	1.3e-10	2.84e-09	1.01	0.311674	-+?+--	0.417707	1	0.79	0.96			3	69114090	69175239	117	19	54162	0.4	0.34526	+	1
8539	API5	NP_006586.1	0.92	8.07	-4.92	1.15e-06	1.27e-05	0.88	8.07	-6.17	1.29e-09	2.25e-08	-2.51	0.0120753	-+----	0.0272184	1	0.37	0.82			11	43313505	43386080	118	22	54162	-0.46	0.67782	+	1
6944	VPS72	NP_005988.1	1.04	7.45	4.92	1.15e-06	1.27e-05	1.07	7.45	6.87	1.65e-11	4.52e-10	-0.77	0.441446	-+++--	0.549996	1	0.93	0.98			1	151128776	151182689	35	7	54162	-1.21	0.88709	-	1
7407	VARS	NP_006286.1	1.08	7.62	4.92	1.15e-06	1.28e-05	1.11	7.62	6.29	6.49e-10	1.2e-08	-1.42	0.154288	--?---	0.235313	1	0.9	0.96			6	31725295	31783712	120	28	54162	0.89	0.18695	-	1	Yes
399744	LOC399744	XP_001133357.1	1.13	8.3	4.91	1.18e-06	1.3e-05	1.17	8.3	5.55	4.28e-08	5.02e-07	0.99	0.322076	?????+	0.428403	1	1.05	1.05
80745	THUMPD2	NP_079540.1	0.96	6.91	-4.91	1.18e-06	1.31e-05	0.95	6.91	-6.31	5.76e-10	1.08e-08	2.46	0.0138306	-+?++-	0.0305829	1	0.79	0.95			2	39943200	40026416	181	12	54162	1.56	0.058815	-	1
648099	LOC648099	XP_942247.1	0.97	6.84	-4.91	1.18e-06	1.31e-05	0.97	6.84	-4.62	4.8e-06	3.41e-05
84166	NLRC5	NP_115582.3	1.07	7.6	4.91	1.19e-06	1.32e-05	1.07	7.6	4.63	4.47e-06	3.21e-05	1.25	0.211543	++?-++	0.305131	1	1.49	1.12			16	57003469	57137438	470	82	54162	1.55	0.060548	+	1	Yes
83985	SPNS1	NP_114427.1	1.06	7.73	4.91	1.21e-06	1.33e-05	1.09	7.73	6.36	4.18e-10	8.09e-09	1.33	0.185137	+-+++-	0.273394	1	1.15	1.04			16	28966028	29015869	64	11	54162	0.98	0.16431	+	1
115294	PCMTD1	NP_443169.1	0.88	7.64	-4.91	1.21e-06	1.33e-05	0.81	7.64	-7.23	1.58e-12	5.61e-11	4.35	1.35e-05	-++++-	7.67e-05	0.316607	1.2	1.03	0.6147	0.5487	8	52710140	52831735	383	15	54162	2.27	0.011481	-	1
126074	C19orf39	NP_787067.1	1.05	7.18	4.91	1.21e-06	1.33e-05	1.02	7.18	2.03	0.0428931	0.0981966	3.29	0.00100721	+-++++	0.00315772	1	1.32	1.08			19	11465383	11507627	47	7	54162	-1.21	0.88722	+	1
9014	TAF1B	NP_005671.1	0.96	7.01	-4.91	1.21e-06	1.34e-05	0.95	7.01	-5.23	2.33e-07	2.28e-06	-1.57	0.11579	++----	0.185658	1	1.15	0.98			2	9963571	10094545	543	23	54162	-0.76	0.77592	+	1
3937	LCP2	NP_005556.1	1.05	7.55	4.91	1.22e-06	1.34e-05	1.04	7.55	3.36	0.000823235	0.00327452	4.32	1.58e-05	-+?+++	8.82e-05	0.372218	1.38	1.1			5	169655088	169744822	146	38	54162	0.42	0.33787	-	1
6204	RPS10	NP_001005.1	0.86	12	-4.9	1.22e-06	1.35e-05	0.86	12	-4.27	2.25e-05	0.000134502	3.31	0.000920981	++?++?	0.00292176	1	1.21	1.1			6	34365231	34413902	92	11	54162	0.53	0.29704	-	1
23416	KCNH3	NP_036416.1	1.05	6.97	4.9	1.23e-06	1.35e-05	1.05	6.97	4.49	8.83e-06	5.85e-05	1.17	0.242206	---+++	0.340987	1	0.84	0.97			12	49912834	49972091	70	8	54162	-2.12	0.98307	+	1
10943	MSL3L1	NP_523352.1	1.05	7.48	4.9	1.23e-06	1.35e-05	0.91	8.38	-4.28	2.2e-05	0.000132327	-3.26	0.00112378	-+?---	0.00347139	1	0.71	0.9
84991	RBM17	NP_116294.1	0.92	7.93	-4.9	1.24e-06	1.36e-05	0.91	7.93	-5.25	2.14e-07	2.11e-06	5.26	1.47e-07	+++++-	1.7e-06	0.00346017	1.59	1.19	0.7024	0.5924	10	6110949	6179422	255	33	54162	0.27	0.39463	+	1	Yes
131965	METTL6	NP_689609.2	0.98	6.69	-4.9	1.24e-06	1.36e-05	0.98	6.69	-5.19	2.91e-07	2.78e-06	-5.78	7.4e-09	--?---	1.5e-07	0.00017423	0.8	0.86	-0.6659	-0.5138	3	15402782	15489054	183	20	54162	1.3	0.096202	-	1
55892	MYNN	NP_061127.1	0.94	7.04	-4.9	1.24e-06	1.36e-05	0.9	7.04	-6.51	1.65e-10	3.55e-09	1.52	0.128153	-+?++-	0.202012	1	0.68	0.95			3	169470619	169527504	79	6	54162	-0.41	0.65876	+	1
124583	CANT1	NP_620148.1	1.09	8.96	4.9	1.25e-06	1.37e-05	1.1	8.96	4.82	1.88e-06	1.47e-05	-0.65	0.517888	--++--	0.621381	1	1.18	0.97			17	76967798	77025899	141	23	54162	0.38	0.35145	-	1
1506	CTRL	NP_001898.1	1.04	7.02	4.9	1.26e-06	1.37e-05	1.04	7.02	3.64	0.000299189	0.00135247	3.43	0.000603949	++?+++	0.00202926	1	1.15	1.06		0.4957	16	67943473	67985778	27	5	54162	-0.6	0.72484	-	1
53916	RAB4B	NP_057238.2	1.06	7.9	4.9	1.26e-06	1.37e-05	1.07	7.9	5.53	4.89e-08	5.63e-07	-0.78	0.438019	???--?	0.546478	1	0.98	0.99			19	41263670	41322849	163	21	54162	-1.57	0.94199	+	1
80213	TM2D3	NP_510883.2	0.91	8.45	-4.9	1.27e-06	1.39e-05	0.86	8.45	-6.77	3.32e-11	8.43e-10	-4.98	6.49e-07	--?---	5.85e-06	0.0152705	0.49	0.8	-0.6012	-0.4911	15	102153429	102212594	133	17	54162	-1.17	0.87988	-	1
53829	P2RY13	NP_795713.1	0.9	7.69	-4.9	1.28e-06	1.39e-05	0.86	7.69	-6.12	1.75e-09	2.93e-08	1.52	0.1294	?+?+--	0.20361	1	1.08	1.03			3	151024096	151067337	97	13	54162	2.7	0.0034991	-	1
64718	UNKL	NP_075564.3	1.07	7.54	4.9	1.28e-06	1.4e-05	1.07	7.54	4.69	3.41e-06	2.52e-05	-0.88	0.380067	++?--+	0.489532	1	1.09	1.03			16	1393206	1484750	163	14	54162	-0.6	0.72517	-	1
23172	KIAA0157	NP_115558.3	0.94	7.8	-4.9	1.28e-06	1.4e-05	0.93	7.8	-5.63	2.91e-08	3.57e-07	-3.57	0.00035949	--?---	0.00129896	1	0.63	0.88			10	126470354	126545239	106	14	54162	-0.87	0.80835	+	1
645683	LOC645683		0.89	12.09	-4.89	1.29e-06	1.41e-05	0.91	12.09	-3.76	0.000187753	0.000902133	0.67	0.502889	?????+	0.60766	1	1.03	1.03													Yes
79717	PPCS	NP_078940.2	0.93	8.41	-4.89	1.31e-06	1.42e-05	0.9	8.41	-6.29	6.38e-10	1.18e-08	-6.64	3.05e-11	--?---	1.82e-09	7.17e-07	0.66	0.82	-0.6432	-0.5034	1	42901968	42959088	133	10	54162	-0.88	0.8099	+	1
6877	TAF5	NP_008882.2	0.96	7	-4.89	1.34e-06	1.46e-05	0.94	7	-6.3	5.89e-10	1.1e-08	1.67	0.0941473	-+?++-	0.155852	1	0.85	0.98			10	105107724	105168822	59	8	54162	-0.7	0.75825	+	1
113419	TEX261	NP_653183.2	1.04	7.17	4.89	1.35e-06	1.47e-05	1.06	7.17	5.72	1.7e-08	2.2e-07	3.05	0.00231264	+++++-	0.00652085	1	1.32	1.07			2	71193068	71242001	105	19	54162	-1.73	0.95839	-	1
92400	RBM18	NP_149108.1	0.95	7.21	-4.88	1.35e-06	1.47e-05	0.94	7.21	-5.89	6.57e-09	9.52e-08	-4.1	4.11e-05	-+?---	0.000200322	0.967365	0.63	0.84			9	124981834	125047143	95	14	54162	1	0.15939	-	1
10552	ARPC1A	NP_006400.2	1.06	7.86	4.88	1.37e-06	1.49e-05	1.04	7.86	2.79	0.00543207	0.016978	-4.3	1.72e-05	-----+	9.46e-05	0.4038	0.51	0.85	-0.6217	-0.4856	7	98903496	98983885	116	11	54162	2.49	0.0063504	+	1
58478	ENOPH1	NP_067027.1	0.93	7.38	-4.88	1.37e-06	1.49e-05	0.9	7.38	-6.13	1.69e-09	2.85e-08	-5.96	2.52e-09	--?---	6.44e-08	5.94e-05	0.71	0.86	-0.6352	-0.4753	4	83331726	83402245	157	24	54162	-0.63	0.73572	+	1
51626	DYNC2LI1	NP_057092.2	0.98	6.72	-4.88	1.39e-06	1.51e-05	0.97	6.72	-6.06	2.46e-09	4e-08	-5.4	6.77e-08	--?--+	9.09e-07	0.00159296	0.69	0.84		-0.4934	2	43981178	44075095	299	24	54162	-0.1	0.53868	+	1
1981	EIF4G1	NP_886553.2	1.08	8.2	4.88	1.39e-06	1.51e-05	1.12	7.78	7.09	3.91e-12	1.25e-10	2.64	0.00818329	+-?++-	0.0194047	1	1.5	1.09			3	184012283	184073146	114	22	54162	0.13	0.44699	+	1
7791	ZYX	NP_003452.1	1.13	10.95	4.88	1.39e-06	1.51e-05	1.18	10.06	5.7	1.9e-08	2.42e-07	0.01	0.988471	+-?--+	0.992139	1	1.16	1.03			7	143058338	143108204	100	25	54162	5.56	1.38e-08	+	0.00025156
28969	BZW2	NP_054757.1	0.95	7.72	-4.88	1.39e-06	1.51e-05	0.95	7.72	-4.06	5.53e-05	0.000301587	-6.3	3.01e-10	------	1.15e-08	7.09e-06	0.71	0.86	-0.6799	-0.5941	7	16665759	16766148	291	35	54162	-1.18	0.88106	+	1	Yes
1495	CTNNA1	NP_001894.2	1.1	9.04	4.88	1.39e-06	1.51e-05	1.08	9.04	3.59	0.000361344	0.00159665	-2.21	0.0268481	+++--+	0.0539899	1	1.41	1.06	-0.6798	-0.5735	5	138069075	138290723	297	5	54162	-0.16	0.56299	+	1	Yes
10592	SMC2	NP_001036015.1	0.97	6.8	-4.88	1.4e-06	1.52e-05	0.96	6.8	-6.56	1.18e-10	2.62e-09	-1.8	0.0717716	-+?---	0.123966	1	0.63	0.89			9	106836213	106923700	198	14	54162	0.74	0.23101	+	1
6208	RPS14	NP_001020242.1	0.89	10.89	-4.88	1.41e-06	1.52e-05	0.9	10.89	-3.78	0.000176715	0.000855783	-0.06	0.950457	++?-+-	0.965892	1	1.29	1.05			5	149802712	149849351	116	9	54162	1.36	0.087313	-	1	Yes
2123	EVI2A	NP_055025.2	0.82	7.95	-4.88	1.41e-06	1.52e-05	0.73	7.95	-6.9	1.37e-11	3.81e-10	-1.18	0.239284	++?---	0.337612	1	1.27	0.99			17	29623428	29668767	48	3	54162	1.55	0.060314	-	1
7745	ZNF192	NP_006289.2	0.98	6.7	-4.88	1.41e-06	1.53e-05	0.98	6.7	-5.28	1.87e-07	1.87e-06	-1.13	0.258331	?-?-+-	0.359103	1	0.87	0.95		0.4738	6	28089688	28147250	164	11	54162	1.14	0.12644	+	1
55625	ZDHHC7	NP_060210.1	1.07	9.65	4.87	1.42e-06	1.54e-05	1.07	9.65	4.59	5.35e-06	3.75e-05	3.11	0.00188233	---+++	0.00544789	1	0.95	1.01		0.4531	16	84988066	85065141	314	25	54162	-0.31	0.62027	-	1
596	BCL2	NP_000624.2	0.9	8.33	-4.87	1.43e-06	1.54e-05	0.92	7.78	-4.55	6.52e-06	4.48e-05	3.6	0.000322232	++?++-	0.00118194	1	1.97	1.24	0.6238	0.548	18	60770579	61007011	561	86	54162	-0.2	0.57985	-	1
79746	ECHDC3	NP_078969.2	1.1	7.3	4.87	1.43e-06	1.54e-05	1.02	7.3	0.76	0.446275	0.602696	6.24	4.3e-10	?+?++-	1.53e-08	1.01e-05	1.39	1.19		0.4602	10	11764356	11826065	191	19	54162	1.26	0.10309	+	1
54442	KCTD5	NP_061865.1	1.06	8.42	4.87	1.44e-06	1.55e-05	1.03	8.42	2.58	0.0101701	0.0291988	0.53	0.599153	+-?-+-	0.692576	1	1.13	1.03			16	2712495	2779031	90	9	54162	-0.08	0.53037	+	1
56254	RNF20	NP_062538.5	0.93	8.06	-4.87	1.45e-06	1.57e-05	0.94	8.06	-4.28	2.17e-05	0.000130449	-0.49	0.622532	-++-+-	0.712668	1	0.72	0.97			9	104276131	104345626	160	25	54162	-0.03	0.51011	+	1
55257	C20orf20	NP_060740.1	0.94	7.76	-4.87	1.46e-06	1.57e-05	0.92	7.76	-5.58	3.65e-08	4.35e-07	0.2	0.844629	-++---	0.890412	1	1.2	1.01			20	61407804	61451945	126	24	54162	-0.51	0.69617	+	1
4051	CYP4F3	NP_000887.1	1.19	9.77	4.87	1.46e-06	1.57e-05	1.04	9.77	0.98	0.325183	0.480573	0.18	0.860394	-+???+	0.901785	1	0.96	1			19	15731701	15791570	359	25	54162	-0.29	0.61283	+	1
8972	MGAM	NP_004659.1	1.11	7.59	4.87	1.48e-06	1.59e-05	1.07	7.59	3.02	0.00265096	0.00908375	3.29	0.000988171	???+++	0.00310353	1	1.25	1.13			7	141675676	141826547	255	32	54162	-0.6	0.72636	+	1	Yes
389125	MUSTN1	NP_995325.2	1.04	6.94	4.86	1.5e-06	1.61e-05	1.05	6.94	5.41	9.26e-08	9.93e-07	-0.12	0.904422	???+-?	0.933719	1	0.97	0.99			3	52847131	52889235	86	8	54162	-0.35	0.63537	-	1
64210	MMS19L	NP_071757.2	1.07	8.59	4.86	1.5e-06	1.61e-05	1.11	8.59	6.86	1.83e-11	4.97e-10	2.42	0.0154522	-+++++	0.0336128	1	0.82	1.01			10	99198081	99278521	137	19	54162	-0.6	0.72579	-	1
23254	KIAA1026	NP_001018000.1	1.07	7.09	4.86	1.5e-06	1.61e-05	1.04	7.09	2.54	0.0112158	0.0318142	-3.66	0.000251526	+-?---	0.000955506	1	1.69	1.04			1	14199646	15464544	4086	312	54162	0.13	0.44706	+	1
2153	F5	NP_000121.2	1.1	7.73	4.86	1.51e-06	1.62e-05	1.05	7.73	2.28	0.0231227	0.0588436	4.98	6.43e-07	-+?++-	5.81e-06	0.0151248	1.3	1.1		0.4435	1	169461192	169575769	411	33	54162	-0.14	0.55529	-	1	Yes
648470	LOC648470	XP_942607.1	0.94	7.17	-4.86	1.51e-06	1.62e-05	0.95	7.17	-3.68	0.000258576	0.0011904
84248	FYTTD1	NP_001011537.1	0.97	6.94	-4.86	1.51e-06	1.62e-05	0.94	7.26	-3.76	0.000189503	0.00090958	-1.04	0.300449	-+?+--	0.405621	1	0.69	0.92			3	197456424	197531317	123	11	54162	0.18	0.42722	+	1
23046	KIF21B	NP_060066.2	1.08	7.68	4.86	1.51e-06	1.62e-05	1.07	7.68	3.99	7.62e-05	0.000403236	-2.06	0.0395195	+-?---	0.0749733	1	1.22	0.99			1	200918514	201012828	212	22	54162	3.66	0.00012753	-	1
63892	THADA	NP_071348.3	1.05	7.5	4.86	1.53e-06	1.64e-05	1.08	7.5	6.81	2.5e-11	6.61e-10	2.7	0.00691431	-+?++-	0.0167812	1	1.08	1.02	-0.6734	-0.5881	2	43437975	43843185	932	26	54162	2.19	0.014444	-	1
4043	LRPAP1	NP_002328.1	1.05	7.33	4.86	1.53e-06	1.64e-05	1.03	7.33	2.79	0.00538202	0.016851	-4.23	2.37e-05	--+--+	0.000124733	0.558804	0.67	0.89	-0.6083	-0.4617	4	3485324	3554224	264	18	54162	-0.46	0.67785	-	1
80152	C16orf56	NP_079358.1	1.07	7.97	4.86	1.54e-06	1.65e-05	1.11	7.97	6.31	5.64e-10	1.06e-08	2.18	0.0289233	?--+++	0.0574899	1	1.09	1.03			16	67842060	67901361	71	9	54162	-0.89	0.81344	-	1
25874	BRP44	NP_056230.1	0.94	8.13	-4.86	1.54e-06	1.65e-05	0.92	8.13	-5.67	2.28e-08	2.86e-07	-5.98	2.21e-09	--?---	5.79e-08	5.2e-05	0.62	0.82	-0.6645	-0.5378	1	167865913	167926307	76	6	54162	1.38	0.083425	-	1
6948	TCN2	NP_000346.2	1.05	7.03	4.86	1.54e-06	1.65e-05	1.04	7.03	3.77	0.000179726	0.000868334	3.96	7.53e-05	+-++++	0.00033753	1	1.36	1.15			22	30983070	31043047	294	26	54162	0.09	0.46351	+	1	Yes
51550	CINP	NP_116019.1	0.98	6.78	-4.86	1.55e-06	1.65e-05	0.98	6.78	-3.46	0.000575688	0.00239845	-3.58	0.000344304	+-+---	0.00125177	1	0.9	0.97			14	102794619	102849253	108	17	54162	-0.64	0.73892	-	1
27101	CACYBP	NP_055227.1	0.95	7.35	-4.86	1.56e-06	1.66e-05	0.95	7.35	-4.38	1.41e-05	8.9e-05	-0.3	0.766699	-+?-+-	0.830629	1	0.67	0.92			1	174948571	175001163	68	13	54162	-1.56	0.94077	+	1	Yes
728564	LOC728564		0.95	7.82	-4.86	1.56e-06	1.67e-05	0.96	7.82	-3.49	0.000525217	0.00221167
51735	RAPGEF6	NP_057424.2	1.08	8.99	4.85	1.57e-06	1.67e-05	1.1	8.99	5.33	1.42e-07	1.46e-06	-0.22	0.824817	++?--+	0.875573	1	1.13	1.04			5	130739614	130990929	308	11	54162	0.29	0.38465	-	1	Yes
1742	DLG4	NP_001356.1	1.05	7.06	4.85	1.57e-06	1.67e-05	1.05	7.06	4.43	1.14e-05	7.32e-05	1.13	0.257875	+-?++-	0.358575	1	1.57	1.08			17	7073209	7143369	78	15	54162	0.98	0.16326	-	1
9135	RABEP1	NP_001077054.1	0.9	7.81	-4.85	1.58e-06	1.68e-05	0.87	7.81	-5.99	3.67e-09	5.71e-08	-2.59	0.00970427	--?---	0.0224856	1	0.61	0.86			17	5165558	5309132	457	25	54162	3.77	8.25e-05	+	1
641978	LOC641978	XP_940845.1	1.04	7.1	4.85	1.59e-06	1.7e-05	1.04	7.1	3.61	0.000328223	0.00146884
23108	GARNL4	NP_055900.3	1.08	8.86	4.85	1.59e-06	1.7e-05	1.1	8.86	5.2	2.86e-07	2.73e-06	-0.37	0.70825	+-?--?	0.785387	1	1.11	1			17	2639050	2961035	899	126	54162	1.1	0.13538	+	1	Yes
27235	COQ2	NP_056512.4	0.93	7.6	-4.85	1.63e-06	1.74e-05	0.89	7.6	-6.46	2.3e-10	4.77e-09	-2.53	0.0112919	--?---	0.0256489	1	0.84	0.93			4	84164972	84226067	160	9	54162	0.24	0.40434	-	1
79171	RBM42	NP_077297.2	1.07	8.41	4.84	1.64e-06	1.75e-05	1.1	8.41	6.05	2.57e-09	4.14e-08	1.8	0.0719321	+-+++-	0.12418	1	1.1	1.03			19	36099980	36148587	84	16	54162	0.17	0.43272	+	1
8558	CDK10	NP_443714.2	1.08	7.63	4.84	1.65e-06	1.75e-05	1.09	7.63	5.02	7.05e-07	6.1e-06	2.33	0.0198514	+-?+++	0.0417766	1	2.46	1.21			16	89733076	89782772	135	16	54162	-0.68	0.75159	+	1
5333	PLCD1	NP_006216.2	1.05	7.19	4.84	1.66e-06	1.76e-05	1.06	7.19	5.56	4.25e-08	4.99e-07	3	0.00267311	+-++++	0.00738762	1	1.21	1.07		0.4655	3	38028987	38091154	157	22	54162	1.15	0.12498	-	1
645385	LOC645385	XP_933520.1	0.89	9.45	-4.84	1.66e-06	1.76e-05	0.92	9.45	-3.14	0.00178772	0.00643589
27185	DISC1	NP_001012977.1	1.08	7.26	4.84	1.66e-06	1.77e-05	1.09	7.26	4.61	4.95e-06	3.51e-05	4.31	1.67e-05	???+++	9.23e-05	0.392191	1.14	1.08			1	231742561	232197018	1080	98	54162	1.9	0.028843	+	1
3931	LCAT	NP_000220.1	1.02	6.77	4.84	1.69e-06	1.8e-05	1.01	6.77	2.69	0.00742385	0.0222344	5.94	2.79e-09	?+?+++	6.92e-08	6.58e-05	1.3	1.15		0.471	16	67953787	67998656	35	6	54162	-0.99	0.83846	-	1
8566	PDXK	NP_003672.1	1.08	8.77	4.84	1.7e-06	1.81e-05	1.11	8.77	5.85	8.19e-09	1.15e-07	-2.63	0.00854917	+-?--+	0.0201646	1	1.46	1.01			21	45118978	45202188	263	35	54162	-0.21	0.58277	+	1
5279	PIGC	NP_714969.1	0.96	7.31	-4.84	1.7e-06	1.81e-05	0.97	8.38	-2.38	0.0174472	0.0462522	2.59	0.00969457	???+-?	0.0224653	1	1.04	1.02			1	172390597	172433230	108	15	54162	1.24	0.10708	-	1
65249	ZSWIM4	NP_075560.1	1.07	7.67	4.84	1.7e-06	1.81e-05	1.08	7.67	4.56	6.25e-06	4.31e-05	1.06	0.288529	???++-	0.392978	1	0.95	1			19	13886258	13963068	130	12	54162	-0.1	0.54082	+	1
9726	ZNF646	NP_055514.2	1.04	7.06	4.84	1.71e-06	1.81e-05	1.05	7.06	5	7.82e-07	6.7e-06	3.47	0.000523118	???++-	0.00179274	1	1.16	1.07		0.4722	16	31065581	31114833	53	5	54162	2.54	0.0055034	+	1
25796	PGLS	NP_036220.1	1.07	9.49	4.84	1.71e-06	1.81e-05	1.07	9.49	4.28	2.17e-05	0.000130193	4.4	1.07e-05	++++++	6.33e-05	0.251812	1.47	1.15			19	17602278	17652097	120	21	54162	-0.9	0.81643	+	1
7538	ZFP36	NP_003398.1	1.11	10.5	4.83	1.72e-06	1.82e-05	1.09	10.5	3.35	0.000869041	0.00343076	4.67	2.98e-06	++?+++	2.12e-05	0.0701497	1.45	1.24			19	39877487	39920052	82	17	54162	-0.32	0.62538	+	1
90522	YIF1B	NP_291035.1	1.06	7.48	4.83	1.73e-06	1.83e-05	1.06	7.48	4.88	1.38e-06	1.12e-05	1.25	0.212181	--?+++	0.305834	1	0.7	0.94			19	38774200	38826615	133	15	54162	0.54	0.29385	-	1
645436	LOC645436	XP_933566.1	0.9	9.69	-4.83	1.75e-06	1.84e-05	0.93	9.69	-3.05	0.00242	0.00840394
11284	PNKP	NP_009185.2	1.07	8.35	4.83	1.75e-06	1.84e-05	1.1	8.35	6.11	1.85e-09	3.09e-08	-1.56	0.118543	------	0.189338	1	0.92	0.96		-0.4563	19	50344460	50390840	74	11	54162	-0.29	0.61575	-	1
83716	CRISPLD2	NP_113664.1	1.19	9.89	4.83	1.75e-06	1.85e-05	1.12	9.89	2.9	0.00389072	0.0126808	3.22	0.00126706	+-?+++	0.00384895	1	1.52	1.16	0.5784		16	84833587	84963116	607	64	54162	0.16	0.43468	+	1	Yes
139596	UPRT	NP_659489.1	0.95	7.1	-4.83	1.75e-06	1.85e-05	0.94	7.1	-5.47	6.67e-08	7.43e-07	-4.89	1.01e-06	------	8.57e-06	0.0238321	0.6	0.86
9368	SLC9A3R1	NP_004243.1	1.09	9.77	4.83	1.77e-06	1.87e-05	1.1	9.77	4.75	2.62e-06	1.98e-05	3.08	0.00206958	++?+++	0.00591703	1	1.69	1.18			17	72724751	72785499	97	10	54162	1.58	0.056515	+	1
55973	BCAP29	NP_061332.2	0.96	6.95	-4.83	1.8e-06	1.9e-05	0.96	6.92	-5.31	1.57e-07	1.59e-06	-0.5	0.617959	--?+-+	0.708946	1	0.63	0.86	-0.6289	-0.536	7	107200422	107283762	106	11	54162	-0.59	0.7226	+	1
10072	DPP3	NP_005691.2	1.05	7.39	4.82	1.82e-06	1.91e-05	1.07	7.39	5.6	3.27e-08	3.95e-07	2.77	0.00566739	++?++-	0.0141745	1	1.19	1.06	0.6077	0.5291	11	66227484	66297130	107	6	54162	-0.26	0.60319	+	1
55285	RBM41	NP_060771.2	0.98	6.81	-4.82	1.82e-06	1.92e-05	1.04	6.96	3.49	0.00052363	0.00220744	2.45	0.0143666	++?++-	0.0315994	1	1.47	1.1
80254	CEP63	NP_079456.2	0.91	8.72	-4.82	1.83e-06	1.93e-05	0.88	8.72	-6	3.44e-09	5.38e-08	-0.9	0.368003	-+?--+	0.476796	1	0.84	0.97			3	134184575	134313855	255	5	54162	0.79	0.21483	+	1
55745	C14orf108	NP_060699.2	0.94	7.52	-4.82	1.84e-06	1.93e-05	0.9	7.52	-7.24	1.49e-12	5.31e-11	-1.23	0.218706	--?+--	0.313738	1	0.6	0.87			14	57715606	57776797	57	5	54162	-0.13	0.5529	+	1
1998	ELF2	NP_973728.1	1.07	7.37	4.82	1.85e-06	1.95e-05	0.9	8.01	-5.55	4.3e-08	5.03e-07	3.88	0.000106528	+++++-	0.00045583	1	1.23	1.1			4	139958871	140118372	239	26	54162	-0.21	0.58383	-	1
5725	PTBP1	NP_002810.1	1.08	10.33	4.82	1.85e-06	1.95e-05	1.12	10.33	6.22	9.52e-10	1.7e-08	7.43	1.11e-13	++++++	2.5e-11	2.6e-09	1.69	1.29	0.701	0.5553	19	777392	832327	150	21	54162	-0.31	0.62245	+	1
10475	TRIM38	NP_006346.1	1.09	8.94	4.82	1.85e-06	1.95e-05	1.1	8.94	5.06	5.66e-07	5.03e-06	6.6	4.25e-11	++?+++	2.39e-09	1e-06	1.33	1.19	0.5931	0.4873	6	25942917	26007557	140	17	54162	-0.18	0.5701	+	1	Yes
4343	MOV10	NP_066014.1	1.07	7.53	4.82	1.86e-06	1.95e-05	1.09	7.53	5.64	2.66e-08	3.28e-07	2.59	0.00946696	?+?+++	0.0220051	1	1.12	1.07			1	113197048	113263368	99	14	54162	-0.26	0.60112	+	1
3105	HLA-A	NP_002107.3	1.08	13.97	4.82	1.86e-06	1.95e-05	1.13	11.44	3.95	8.77e-05	0.000456607	3.84	0.000120765	++?+++	0.000506994	1	1.38	1.2			6	29890247	29933661	1298	29	54162	1.1	0.13661	+	1
152100	C3orf68	NP_872329.1	0.97	6.92	-4.82	1.87e-06	1.96e-05	0.96	6.92	-5.55	4.29e-08	5.02e-07	-2.73	0.00631793	-+?---	0.015513	1	0.82	0.93			3	28262838	28381264	192	18	54162	0.05	0.48108	+	1
9679	FAM53B	NP_055476.3	1.09	9.04	4.81	1.89e-06	1.98e-05	1.13	9.04	6.22	9.41e-10	1.68e-08	2.16	0.0307349	++?-+-	0.0605435	1	1.5	1.13	0.5915	0.4518	10	126287861	126452930	375	34	54162	0.6	0.27551	-	1	Yes
90799	CCDC45	NP_612372.1	0.94	7.72	-4.81	1.89e-06	1.98e-05	0.95	7.72	-4.05	5.76e-05	0.00031249	1.24	0.215465	++--++	0.309884	1	1.33	1.08		0.4765	17	62482878	62554069	90	7	54162	0.68	0.24922	+	1
23013	SPEN	NP_055816.2	1.07	8.89	4.81	1.9e-06	1.99e-05	1.06	8.89	3.68	0.000250837	0.0011597	5.9	3.66e-09	++++++	8.43e-08	8.6e-05	1.94	1.23	0.65	0.526	1	16154359	16286951	208	20	54162	0.2	0.42017	+	1
5955	RCN2	NP_002893.1	0.92	7.3	-4.81	1.9e-06	1.99e-05	0.88	7.3	-6.41	3.02e-10	6.08e-09	-6.1	1.09e-09	------	3.26e-08	2.56e-05	0.71	0.85	-0.6097	-0.467	15	77203962	77262601	89	18	54162	0.89	0.18622	+	1	Yes
917	CD3G	NP_000064.1	0.9	8.13	-4.81	1.9e-06	1.99e-05	0.92	8.13	-3.29	0.00105119	0.00405577	1.61	0.108104	???+++	0.175017	1	1.05	1.03			11	118195032	118244497	79	12	54162	0.74	0.22981	+	1
23383	KIAA0892	NP_056144.3	1.07	7.96	4.81	1.93e-06	2.02e-05	1.07	7.96	4.24	2.59e-05	0.000152855	-0.59	0.552305	+-?-++	0.652266	1	1.32	1.06			19	19411496	19489563	139	10	54162	0.68	0.24922	+	1
84318	CCDC77	NP_115734.1	0.96	7.21	-4.81	1.93e-06	2.02e-05	0.95	7.21	-5.55	4.5e-08	5.22e-07	0.55	0.582952	-+-++-	0.678952	1	0.87	0.98			12	478516	571811	193	21	54162	-1.16	0.87634	+	1
6602	SMARCD1	NP_003067.2	1.07	8.69	4.81	1.96e-06	2.05e-05	1.1	8.69	6.06	2.53e-09	4.09e-08	-0.72	0.474469	--?-+-	0.581271	1	0.8	0.95			12	50458760	50514494	71	8	54162	-0.12	0.54797	+	1
64419	MTMR14	NP_071930.2	1.06	7.98	4.81	1.97e-06	2.05e-05	1.07	7.98	4.94	1.01e-06	8.46e-06	1.03	0.303933	+-?+--	0.40946	1	1.38	1.06			3	9671117	9764078	115	15	54162	-0.5	0.69202	+	1
2137	EXTL3	NP_001431.1	1.1	8.08	4.81	1.97e-06	2.06e-05	1.13	8.08	5.56	4.26e-08	5e-07	-2.39	0.0166803	---+--	0.0358828	1	0.79	0.9			8	28538990	28631207	104	12	54162	2.44	0.0073299	+	1
83636	C19orf12	NP_001026896.2	1.08	7.59	4.81	1.98e-06	2.06e-05	1.09	7.59	4.88	1.39e-06	1.13e-05	-1.21	0.227724	+-?---	0.324184	1	1.36	1.02		-0.4433	19	30169793	30226696	187	25	54162	-1.11	0.8656	-	1
1627	DBN1	NP_004386.2	1.06	7.21	4.81	1.98e-06	2.07e-05	1.07	7.21	4.87	1.46e-06	1.17e-05	4.53	5.87e-06	+-+++-	3.79e-05	0.138183	1.63	1.12	0.4762	0.4417	5	176863613	176920694	55	4	54162	-0.07	0.5268	-	1
64121	RRAGC	NP_071440.1	1.06	8.34	4.8	2.01e-06	2.1e-05	1.07	8.34	5.04	6.41e-07	5.61e-06	1.48	0.138213	-+++--	0.214962	1	0.65	0.99			1	39283869	39345495	130	19	54162	0.83	0.2033	-	1
8527	DGKD	NP_003639.2	1.05	7.62	4.8	2.04e-06	2.13e-05	1.04	7.62	3.24	0.00126912	0.00478782	3.01	0.0026014	+++++-	0.00721742	1	1.16	1.07			2	234243149	234400744	311	25	54162	1.81	0.035482	+	1
5914	RARA	NP_000955.1	1.11	10.15	4.8	2.05e-06	2.13e-05	1.16	10.15	6.14	1.53e-09	2.61e-08	1.77	0.0765844	++?++-	0.13081	1	1.19	1.09			17	38445423	38533895	91	9	54162	1.47	0.070854	+	1
4085	MAD2L1	NP_002349.1	0.97	6.78	-4.79	2.08e-06	2.17e-05	0.96	6.78	-5.6	3.36e-08	4.04e-07	-5.43	5.66e-08	--?---	7.92e-07	0.00133143	0.63	0.8		-0.4836	4	120960577	121008013	105	16	54162	1.07	0.14141	-	1
1649	DDIT3	NP_004074.2	0.95	7.13	-4.79	2.08e-06	2.17e-05	0.93	7.13	-6.05	2.63e-09	4.22e-08	-0.28	0.778257	--?-+-	0.840095	1	1.04	1			12	57890371	57934300	43	3	54162	-0.12	0.54626	-	1
641996	LOC641996	XP_941136.1	1.09	7.5	4.79	2.09e-06	2.17e-05	1.11	7.5	4.78	2.26e-06	1.74e-05
64756	ATPAF1	NP_073582.2	0.95	7.54	-4.79	2.09e-06	2.17e-05	0.95	7.54	-4.09	4.84e-05	0.000267991	-5.27	1.33e-07	--?---	1.57e-06	0.00313257	0.65	0.84	-0.6048	-0.5487	1	47080711	47154099	112	7	54162	1.39	0.082684	-	1
8772	FADD	NP_003815.1	1.06	8.32	4.79	2.1e-06	2.18e-05	1	8.32	-0.02	0.987046	0.993162	1.64	0.101548	-+?++-	0.166139	1	0.85	0.99			11	70029269	70073508	102	19	54162	2.1	0.017661	+	1
10179	RBM7	NP_057174.1	0.95	6.96	-4.79	2.1e-06	2.18e-05	0.94	6.96	-5.29	1.72e-07	1.74e-06	4.86	1.16e-06	++?++-	9.61e-06	0.0273336	1.38	1.09		0.5067	11	114251283	114299636	108	14	54162	1.17	0.12151	+	1
6892	TAPBP	NP_757345.1	1.04	7.09	4.79	2.11e-06	2.19e-05	1.19	10.6	7.46	3.26e-13	1.37e-11	3.4	0.000671238	+-++++	0.00222705	1	1.36	1.1			6	33247471	33302164	96	12	54162	0.65	0.25897	-	1
24144	TFIP11	NP_036275.1	1.07	8.2	4.79	2.11e-06	2.19e-05	1.09	8.2	5.72	1.71e-08	2.21e-07	1.5	0.132906	--?++-	0.208221	1	0.83	0.97			22	26867893	26928462	183	31	54162	0.69	0.24628	-	1
6018	RLF	NP_036553.1	0.96	6.99	-4.79	2.12e-06	2.2e-05	0.95	6.99	-5.7	1.91e-08	2.43e-07	-0.53	0.596456	-+?--+	0.690475	1	1.07	1			1	40607041	40726593	118	18	54162	0.4	0.34279	+	1
4055	LTBR	NP_002333.1	1.09	8.51	4.79	2.13e-06	2.21e-05	1.08	8.51	3.79	0.000168395	0.00081863	4.86	1.17e-06	?-?+++	9.66e-06	0.0274895	1.51	1.18	0.6598	0.5017	12	6464534	6520737	130	27	54162	-1.81	0.96472	+	1
30827	CXXC1	NP_055408.1	1.09	9.31	4.79	2.13e-06	2.21e-05	1.17	9.31	7.77	3.62e-14	1.85e-12	3.64	0.000268959	++?++-	0.00101209	1	1.15	1.08			18	47788713	47834692	90	19	54162	-0.29	0.61399	-	1
340542	BEX5	NP_001012996.1	0.97	6.8	-4.78	2.19e-06	2.26e-05	0.98	6.8	-3.8	0.000163502	0.000797053	-5.42	5.92e-08	--?---	8.2e-07	0.00139315	0.38	0.69	-0.6995	-0.578
752	FMNL1	NP_005883.2	1.07	7.38	4.78	2.19e-06	2.26e-05	1.1	7.38	5.63	2.9e-08	3.55e-07	0.72	0.472422	?+?+-+	0.579445	1	1.04	1.01			17	43279192	43344685	136	24	54162	1.64	0.050005	+	1
29956	LASS2	NP_859530.1	1.06	8.42	4.78	2.19e-06	2.27e-05	1.05	8.26	4.05	5.76e-05	0.00031249	2.8	0.00509934	++?+++	0.0129408	1	1.26	1.12		0.4519	1	150917649	150967479	96	14	54162	-0.33	0.62755	-	1
2926	GRSF1	NP_001091947.1	0.94	7.81	-4.78	2.21e-06	2.28e-05	0.92	7.81	-5.38	1.1e-07	1.17e-06	-4.2	2.7e-05	-+?---	0.000139238	0.635902	0.7	0.9		-0.4567	4	71661499	71725627	135	10	54162	-0.9	0.81539	-	1
1375	CPT1B	NP_689452.1	1.07	7.41	4.78	2.22e-06	2.29e-05	1.09	7.41	5.29	1.75e-07	1.77e-06	5.68	1.34e-08	???++?	2.44e-07	0.000315827	1.39	1.27	0.6584	0.5632	22	50987290	51037096	233	27	54162	-0.05	0.52	-	1
10970	CKAP4	NP_006816.2	1.12	9.44	4.78	2.24e-06	2.31e-05	1.06	9.44	2.37	0.0182215	0.0480139	-3.83	0.000127719	--+--+	0.000531993	1	0.86	0.95			12	106611659	106661713	121	24	54162	0.39	0.34958	-	1	Yes
84905	ZNF341	NP_116208.3	1.05	7.35	4.78	2.24e-06	2.31e-05	1.07	7.35	5.66	2.44e-08	3.04e-07	1.49	0.136768	+-?+-+	0.213147	1	1.04	1.01			20	32299566	32400075	127	19	54162	0.5	0.30771	+	1
55039	TRMT12	NP_060426.1	0.95	7.21	-4.78	2.25e-06	2.32e-05	0.96	7.21	-3.63	0.000313994	0.0014135	-2.89	0.00379749	--?---	0.0100285	1	0.69	0.88			8	125443048	125485267	84	13	54162	0.99	0.16002	+	1
3181	HNRPA2B1	NP_112533.1	0.9	9.9	-4.78	2.26e-06	2.33e-05	0.88	9.9	-4.91	1.21e-06	9.87e-06	3.84	0.00012237	++?+++	0.000512706	1	1.44	1.18		0.4643	7	26209547	26260413	97	10	54162	3.77	8.06e-05	-	1
652481	LOC652481	XP_947035.1	0.96	7.17	-4.78	2.26e-06	2.33e-05	0.96	7.17	-3.74	0.00020602	0.00098059
57169	ZNFX1	NP_066363.1	1.11	9.12	4.77	2.29e-06	2.36e-05	1.13	9.12	5.1	4.64e-07	4.21e-06	5.27	1.38e-07	++?+++	1.61e-06	0.00323971	1.26	1.1	0.603	0.4805	20	47842437	47914756	258	13	54162	0.07	0.47196	-	1
84300	C6orf125	NP_115716.1	0.95	7.05	-4.77	2.3e-06	2.37e-05	0.95	7.05	-4.7	3.34e-06	2.47e-05	-1.97	0.048598	--?---	0.0891835	1	0.79	0.94		-0.462	6	33644538	33699528	208	19	54162	0.41	0.33999	-	1
56666	PANX2	NP_443071.1	1.14	8.18	4.77	2.32e-06	2.38e-05	1.08	8.18	2.49	0.0131724	0.0364438	0.83	0.409246	-+?+++	0.518099	1	1.07	1.01			22	50589160	50638724	170	29	54162	-0.35	0.63662	+	1
2889	RAPGEF1	NP_941372.1	1.08	9.34	4.77	2.32e-06	2.38e-05	1.14	9.34	7.04	5.61e-12	1.75e-10	0.97	0.330719	-+?+-+	0.437575	1	0.87	0.98		-0.4657	9	134432157	134635364	493	30	54162	-0.29	0.61385	-	1
5274	SERPINI1	NP_005016.1	0.98	6.79	-4.77	2.32e-06	2.38e-05	0.98	6.79	-4.36	1.53e-05	9.51e-05	-4.8	1.57e-06	--?---	1.23e-05	0.0368247	0.43	0.7	-0.6251	-0.5173	3	167433432	167563357	335	23	54162	1.37	0.084896	+	1
55654	TMEM127	NP_060319.1	1.06	7.43	4.77	2.32e-06	2.38e-05	1.06	7.43	4.28	2.22e-05	0.000133068	-3.53	0.000419142	--+---	0.00148129	1	0.7	0.92		-0.4552	2	96895946	96951751	58	13	54162	1.16	0.1227	-	1
161	AP2A2	NP_036437.1	1.04	7.19	4.77	2.32e-06	2.38e-05	1.07	7.19	6.73	4.14e-11	1.04e-09	-4.25	2.1e-05	--?--+	0.000111931	0.493056	0.59	0.85			11	905809	1032245	306	11	54162	4.16	1.62e-05	+	0.29531
9589	WTAP	NP_004897.2	0.92	8.69	-4.77	2.33e-06	2.39e-05	0.86	8.69	-7.37	6.23e-13	2.43e-11	6.55	5.8e-11	-+++++	3.07e-09	1.36e-06	0.66	1.06	0.6526	0.5178	6	160127712	160197351	169	16	54162	-0.87	0.80809	+	1
4176	MCM7	NP_877577.1	1.07	8.8	4.77	2.35e-06	2.41e-05	1.09	8.8	5.21	2.71e-07	2.61e-06	5.28	1.31e-07	++?+++	1.55e-06	0.00307596	1.58	1.21			7	99670351	99719563	75	11	54162	2.65	0.00402	-	1
7574	ZNF26	NP_062537.2	0.96	7.1	-4.77	2.36e-06	2.42e-05	0.93	7.1	-7.2	1.98e-12	6.88e-11	-2.98	0.00291851	??----	0.00797526	1	0.87	0.94
84245	MGC3207	NP_115661.1	1.08	8.12	4.77	2.37e-06	2.43e-05	1.09	8.12	4.47	9.44e-06	6.21e-05	-2.17	0.0302029	+-?--+	0.0596404	1	1.35	1.03			19	13855328	13905096	119	13	54162	-1.12	0.86784	+	1	Yes
196527	TMEM16F	NP_001020527.1	1.06	7.72	4.77	2.39e-06	2.45e-05	1.02	7.72	1.2	0.231853	0.375591	2.44	0.0148234	++?+++	0.0324189	1	1.56	1.17			12	45589770	45854187	434	18	54162	-0.21	0.58351	+	1
3304	HSPA1B	NP_005337.1	1.12	8.42	4.76	2.4e-06	2.46e-05	1.11	8.42	4	7.1e-05	0.000378017	3.82	0.000134064	??+++?	0.000555079	1	1.76	1.39			6	31769964	31818032	111	28	54162	0.42	0.33759	+	1
6222	RPS18	NP_072045.1	0.84	9.86	-4.76	2.42e-06	2.47e-05	0.81	9.86	-4.9	1.28e-06	1.05e-05	1.88	0.0602809	++?+++	0.107155	1	1.27	1.1			6	33219852	33264281	99	15	54162	0.01	0.49648	+	1	Yes
140901	STK35	NP_543026.1	1.04	7.09	4.76	2.43e-06	2.48e-05	1.04	7.09	3.74	0.000202857	0.000967353	2.48	0.0131781	++++++	0.0293165	1	1.44	1.12			20	2062528	2149201	224	21	54162	-0.14	0.55437	+	1
51081	MRPS7	NP_057055.1	0.95	7.3	-4.76	2.44e-06	2.48e-05	0.94	7.3	-5.24	2.31e-07	2.26e-06	-3.54	0.00039572	--+---	0.00141123	1	0.8	0.92	-0.5961		17	73237749	73282457	88	8	54162	-0.88	0.81169	+	1
114882	OSBPL8	NP_065892.1	0.91	8.01	-4.76	2.44e-06	2.49e-05	0.88	8.01	-5.67	2.31e-08	2.89e-07	-2.22	0.0261351	-+?---	0.0527966	1	0.75	0.93			12	76725577	76973589	407	19	54162	0.17	0.43176	-	1
23560	GTPBP4	NP_036473.2	0.93	8.14	-4.76	2.44e-06	2.49e-05	0.93	8.14	-4.04	6e-05	0.000324272	-4.7	2.57e-06	-+?---	1.88e-05	0.0604059	0.52	0.85			10	1014349	1083708	189	18	54162	-0.12	0.54781	+	1	Yes
57617	VPS18	NP_065908.1	1.07	7.67	4.76	2.45e-06	2.5e-05	1.09	7.67	5.49	6.1e-08	6.86e-07	-0.82	0.410799	--++--	0.519442	1	0.75	0.94			15	41166628	41216173	93	12	54162	-0.78	0.78335	+	1
55229	PANK4	NP_060686.1	1.04	7.22	4.76	2.47e-06	2.51e-05	1.05	7.22	5.31	1.6e-07	1.62e-06	0.13	0.894597	-+-+--	0.926776	1	0.82	0.97			1	2419975	2478061	102	10	54162	-1.24	0.89301	-	1
94101	ORMDL1	NP_057551.1	0.91	8.23	-4.76	2.49e-06	2.53e-05	0.85	8.23	-7.17	2.36e-12	8.01e-11	-1.58	0.114962	--?-+-	0.184494	1	0.62	0.87			2	190614993	190669097	96	10	54162	1.13	0.12989	-	1
10533	ATG7	NP_006386.1	1.08	8.28	4.76	2.49e-06	2.53e-05	1.08	8.28	4.08	5.17e-05	0.000284814	-5.35	8.98e-08	------	1.14e-06	0.00211314	0.8	0.88	-0.6583	-0.5577	3	11294010	11619139	646	22	54162	-1.91	0.97171	+	1	Yes
641	BLM	NP_000048.1	0.97	6.85	-4.75	2.53e-06	2.57e-05	0.97	6.85	-4	7.1e-05	0.000378017	1.25	0.209745	++?++-	0.303039	1	1.16	1.03			15	91240579	91378686	368	19	54162	-1.22	0.88839	+	1
117177	RAB3IP	NP_783323.1	0.94	7.5	-4.75	2.56e-06	2.59e-05	1.05	8	3.11	0.00199176	0.00708083	-0.69	0.48896	++?---	0.594586	1	1.22	1.02			12	70112466	70236984	300	21	54162	0.63	0.26391	+	1
3106	HLA-B	NP_005505.2	1.1	12.94	4.75	2.56e-06	2.6e-05	1.09	12.94	3.97	8.19e-05	0.000429864	3.86	0.000113482	++?+++	0.000479997	1	1.39	1.2			6	31301649	31344989	1526	46	54162	1.46	0.071496	-	1	Yes
10445	MCRS1	NP_006328.2	1.06	8.88	4.75	2.56e-06	2.6e-05	1.07	8.88	5.1	4.63e-07	4.2e-06	1.78	0.0749669	--?++-	0.12856	1	1.05	1			12	49932077	49981928	64	6	54162	-1.78	0.96248	-	1
84328	LZIC	NP_115744.2	0.97	6.96	-4.75	2.57e-06	2.6e-05	0.96	6.96	-5.78	1.22e-08	1.64e-07	-2.03	0.0427361	-+?---	0.0801579	1	0.75	0.92			1	9962168	10023460	91	12	54162	-0.26	0.603	-	1
27183	VPS4A	NP_037377.1	1.04	7.44	4.75	2.57e-06	2.6e-05	1.06	7.44	5.42	8.67e-08	9.35e-07	-1.35	0.178054	+-+---	0.264613	1	1.16	1.02			16	69325242	69378951	102	12	54162	1.03	0.15191	+	1
2873	GPS1	NP_004118.3	1.07	8.76	4.75	2.58e-06	2.61e-05	1.12	8.76	7.03	6.13e-12	1.89e-10	-2.82	0.00483934	--?--+	0.012357	1	0.69	0.91			17	79989746	80035346	83	10	54162	-1.38	0.91567	+	1
56848	SPHK2	NP_064511.2	1.06	8.19	4.75	2.58e-06	2.61e-05	1.09	8.19	6.36	4.16e-10	8.06e-09	3.27	0.00105935	-++++-	0.00329759	1	1.19	1.05			19	49102548	49153974	87	13	54162	-1.68	0.95304	+	1
23514	KIAA0146	NP_001073863.1	1.04	7.45	4.75	2.59e-06	2.62e-05	1.04	7.45	3.53	0.000447107	0.00192259	1.67	0.0941982	++?+++	0.155904	1	1.14	1.07			8	48153489	48668563	307	19	54162	-0.27	0.60599	+	1
10383	TUBB2C	NP_006079.1	1.09	8.35	4.75	2.59e-06	2.62e-05	1.14	8.35	6.8	2.59e-11	6.81e-10	-4.74	2.13e-06	--?---	1.61e-05	0.0502323	0.68	0.82		-0.4753
84190	C12orf26	NP_115606.1	0.94	7.24	-4.75	2.62e-06	2.64e-05	0.91	7.24	-6.71	4.67e-11	1.16e-09	3.09	0.00202913	-++++-	0.00581483	1	1.09	1.02			12	82732276	82893018	305	9	54162	0.51	0.30616	+	1	Yes
26276	VPS33B	NP_061138.3	1.05	7.58	4.74	2.65e-06	2.67e-05	1.05	7.58	4.47	9.36e-06	6.17e-05	-5.14	2.77e-07	--?---	2.88e-06	0.00651988	0.61	0.85		-0.5403	15	91521774	91585833	205	29	54162	0.43	0.33188	-	1
6257	RXRB	NP_068811.1	1.05	8.11	4.74	2.68e-06	2.7e-05	1.06	8.11	4.66	4.03e-06	2.91e-05	-4.95	7.36e-07	--+--+	6.49e-06	0.0173105	0.81	0.94			6	33141362	33188630	104	18	54162	-1.14	0.87264	-	1
91151	TIGD7	NP_149985.2	0.97	6.79	-4.74	2.69e-06	2.71e-05	0.95	6.79	-5.65	2.6e-08	3.21e-07	-5.79	6.83e-09	------	1.4e-07	0.000160802	0.65	0.84	-0.5617	-0.4732	16	3328808	3375439	47	4	54162	-0.18	0.57338	-	1	Yes
5134	PDCD2	NP_659005.1	0.95	7.22	-4.74	2.7e-06	2.71e-05	0.94	7.22	-4.91	1.2e-06	9.86e-06	-7.86	3.77e-15	-----+	1.97e-12	8.88e-11	0.56	0.81	-0.7352	-0.5695	6	170864660	170913780	112	9	54162	1.44	0.075606	-	1
55004	C11orf59	NP_060377.1	1.07	9.87	4.74	2.71e-06	2.72e-05	1.06	9.87	3.22	0.00136448	0.00509437	-0.89	0.375583	+-+--+	0.485015	1	1.32	1.05			11	71785371	71834433	90	5	54162	-1.04	0.85018	-	1
6207	RPS13	NP_001008.1	0.89	11.22	-4.74	2.72e-06	2.73e-05	0.87	11.22	-5.05	6.08e-07	5.35e-06	3.04	0.00238821	??+++?	0.00670313	1	1.1	1.07			11	17075939	17119220	78	10	54162	1.81	0.034775	-	1	Yes
84080	C16orf48	NP_115516.1	1.04	7.29	4.74	2.73e-06	2.73e-05	1.03	7.29	3.47	0.000551895	0.0023099	1.68	0.0927649	+-+-++	0.154008	1	1.41	1.1			16	67676850	67720628	43	7	54162	-1.15	0.87548	-	1
50640	PNPLA8	NP_056538.1	0.94	7.02	-4.74	2.75e-06	2.76e-05	0.93	7.02	-5.19	2.97e-07	2.83e-06	3.19	0.00140425	++?++-	0.00421238	1	1.39	1.09		0.4735	7	108090866	108188605	250	20	54162	-0.71	0.76055	-	1
221178	SPATA13	NP_694568.1	1.1	8.31	4.73	2.8e-06	2.81e-05	1.1	8.31	3.98	7.87e-05	0.00041502	4.77	1.88e-06	++?+++	1.44e-05	0.0441197	2.08	1.31	0.6085	0.4769	13	24533765	24901212	1406	154	54162	-0.29	0.61382	+	1
290	ANPEP	NP_001141.1	1.16	9.32	4.73	2.82e-06	2.82e-05	1.19	9.32	4.72	3.02e-06	2.26e-05	3.84	0.00012526	?-?+++	0.00052323	1	1.19	1.1			15	90308126	90378119	213	22	54162	0.56	0.28795	-	1
22849	CPEB3	NP_055727.3	1.05	7.57	4.73	2.82e-06	2.82e-05	1.02	7.57	1.79	0.0745167	0.154155	1.23	0.217081	++?+--	0.311801	1	1.53	1.1	0.515	0.459	10	93786452	94070875	335	16	54162	0.57	0.28493	-	1	Yes
7553	ZNF7	NP_003407.1	0.95	7.2	-4.73	2.85e-06	2.86e-05	0.95	7.2	-4.48	9.2e-06	6.08e-05	-2.69	0.0071303	------	0.0172219	1	0.77	0.93			8	146032855	146092893	117	7	54162	0.58	0.28029	+	1
27010	TPK1	NP_001035947.1	0.93	7.78	-4.73	2.88e-06	2.88e-05	0.91	7.78	-5.27	1.92e-07	1.92e-06	-3.35	0.000810805	--?---	0.00261884	1	0.44	0.81			7	144129034	144553488	983	63	54162	-1.03	0.84749	-	1
25953	PNKD	NP_056303.3	0.98	6.8	-4.73	2.89e-06	2.89e-05	0.97	6.8	-4.99	8.12e-07	6.91e-06	-4.36	1.28e-05	------	7.32e-05	0.300078	0.51	0.84		-0.5077	2	219115115	219231516	241	17	54162	0.09	0.46286	+	1
11186	RASSF1	NP_733830.1	1.09	9.01	4.73	2.89e-06	2.89e-05	1.08	7.68	4.99	8e-07	6.82e-06	4.87	1.09e-06	?+++++	9.12e-06	0.0257198	1.19	1.09		0.4466	3	50347217	50398367	29	9	54162	-0.87	0.80772	-	1	Yes
10577	NPC2	NP_006423.1	1.09	12.11	4.73	2.9e-06	2.9e-05	1.05	12.11	2.43	0.0152557	0.041289	7.25	4.27e-13	++++++	6.93e-11	1.01e-08	1.38	1.27	0.6758	0.5556	14	74922900	74980084	126	13	54162	-1.18	0.88119	-	1	Yes
117289	TAGAP	NP_620165.1	1.08	8.26	4.73	2.91e-06	2.9e-05	1.07	8.13	3.54	0.000429759	0.00185783	3.45	0.000553716	-+?+++	0.00188334	1	1.27	1.1			6	159435500	159486184	154	14	54162	-0.5	0.69176	-	1	Yes
[truncated: 4,391 more rows]
