# Supplementary material for: Systematic Analysis and Biomarker Study for Alzheimer’s Disease
Source: Sci Rep. 2018 Nov 26;8:17394. doi: 10.1038/s41598-018-35789-3 (PMC6255913; doi:10.1038/s41598-018-35789-3)
Supplement: Supplementary file 3 — Supplementary Table 3 [file 41598_2018_35789_MOESM3_ESM.xlsx]

## Sheet: AD up-regulated
Ingenuity Canonical Pathways	-log(B-H p-value)	Ratio
iNOS Signaling	6.01	0.488
B Cell Receptor Signaling	5.45	0.27
JAK/Stat Signaling	5.45	0.349
Production of Nitric Oxide and Reactive Oxygen Species in Macrophages	5.45	0.26
NGF Signaling	5.16	0.302
Apoptosis Signaling	5.05	0.33
Erythropoietin Signaling	5.05	0.342
TREM1 Signaling	5.05	0.357
PI3K/AKT Signaling	4.91	0.289
Death Receptor Signaling	4.9	0.319
NF-κB Signaling	4.83	0.256
Toll-like Receptor Signaling	4.83	0.342
Role of JAK1, JAK2 and TYK2 in Interferon Signaling	4.69	0.542
PPARα/RXRα Activation	4.6	0.253
Gap Junction Signaling	4.6	0.253
Role of PKR in Interferon Induction and Antiviral Response	4.6	0.425
Type I Diabetes Mellitus Signaling	4.6	0.297
FLT3 Signaling in Hematopoietic Progenitor Cells	4.5	0.317
PI3K Signaling in B Lymphocytes	4.5	0.274
TWEAK Signaling	4.5	0.455
IL-10 Signaling	4.5	0.338
Induction of Apoptosis by HIV1	4.47	0.356
GNRH Signaling	4.32	0.268
IL-6 Signaling	4.32	0.268
TNFR1 Signaling	4.31	0.383
Phagosome Maturation	4.23	0.261
Tec Kinase Signaling	4.2	0.245
Germ Cell-Sertoli Cell Junction Signaling	4.2	0.243
Fcγ Receptor-mediated Phagocytosis in Macrophages and Monocytes	4.18	0.293
Integrin Signaling	4.14	0.226
Interferon Signaling	4.09	0.417
Prolactin Signaling	4.09	0.301
ERK/MAPK Signaling	3.99	0.228
PPAR Signaling	3.93	0.289
Leukocyte Extravasation Signaling	3.9	0.224
PTEN Signaling	3.87	0.263
NF-κB Activation by Viruses	3.85	0.291
Remodeling of Epithelial Adherens Junctions	3.82	0.318
Molecular Mechanisms of Cancer	3.79	0.193
IL-17A Signaling in Fibroblasts	3.64	0.4
Phospholipase C Signaling	3.6	0.214
14-3-3-mediated Signaling	3.53	0.248
TNFR2 Signaling	3.43	0.429
LPS-stimulated MAPK Signaling	3.43	0.279
Sertoli Cell-Sertoli Cell Junction Signaling	3.4	0.225
Acute Phase Response Signaling	3.4	0.228
Natural Killer Cell Signaling	3.4	0.25
Caveolar-mediated Endocytosis Signaling	3.39	0.296
Role of NFAT in Regulation of the Immune Response	3.37	0.224
Dendritic Cell Maturation	3.37	0.224
Inflammasome pathway	3.33	0.476
RANK Signaling in Osteoclasts	3.33	0.263
Role of JAK family kinases in IL-6-type Cytokine Signaling	3.33	0.44
Lymphotoxin β Receptor Signaling	3.33	0.299
autophagy	3.33	0.327
PKCθ Signaling in T Lymphocytes	3.33	0.246
Cholecystokinin/Gastrin-mediated Signaling	3.28	0.26
Oncostatin M Signaling	3.26	0.382
Neuregulin Signaling	3.16	0.271
IL-2 Signaling	3.14	0.297
Role of Macrophages, Fibroblasts and Endothelial Cells in Rheumatoid Arthritis	3.08	0.192
B Cell Activating Factor Signaling	3.08	0.35
4-1BB Signaling in T Lymphocytes	3.07	0.387
Growth Hormone Signaling	3.07	0.272
Role of RIG1-like Receptors in Antiviral Innate Immunity	2.97	0.341
Role of JAK2 in Hormone-like Cytokine Signaling	2.94	0.375
IL-3 Signaling	2.92	0.265
ERK5 Signaling	2.88	0.29
IL-22 Signaling	2.85	0.417
PDGF Signaling	2.83	0.256
April Mediated Signaling	2.78	0.342
HGF Signaling	2.78	0.237
Antioxidant Action of Vitamin C	2.75	0.247
Breast Cancer Regulation by Stathmin1	2.73	0.203
CD28 Signaling in T Helper Cells	2.73	0.231
IL-8 Signaling	2.72	0.204
Prostate Cancer Signaling	2.72	0.25
FAK Signaling	2.71	0.245
IL-15 Signaling	2.66	0.263
Regulation of IL-2 Expression in Activated and Anergic T Lymphocytes	2.66	0.263
Activation of IRF by Cytosolic Pattern Recognition Receptors	2.64	0.283
T Cell Receptor Signaling	2.58	0.236
RAR Activation	2.57	0.203
Thrombin Signaling	2.57	0.2
Crosstalk between Dendritic Cells and Natural Killer Cells	2.56	0.247
Type II Diabetes Mellitus Signaling	2.54	0.224
Renin-Angiotensin Signaling	2.54	0.227
IL-12 Signaling and Production in Macrophages	2.53	0.215
CD27 Signaling in Lymphocytes	2.53	0.294
Glucocorticoid Receptor Signaling	2.52	0.184
Role of IL-17F in Allergic Inflammatory Airway Diseases	2.52	0.317
Virus Entry via Endocytic Pathways	2.51	0.235
IL-15 Production	2.48	0.37
ErbB2-ErbB3 Signaling	2.48	0.265
EGF Signaling	2.48	0.265
IL-1 Signaling	2.47	0.242
Tight Junction Signaling	2.41	0.205
ILK Signaling	2.41	0.198
Endometrial Cancer Signaling	2.37	0.266
IGF-1 Signaling	2.35	0.229
p70S6K Signaling	2.33	0.215
iCOS-iCOSL Signaling in T Helper Cells	2.31	0.223
Thrombopoietin Signaling	2.31	0.262
Glycolysis I	2.31	0.375
VEGF Signaling	2.31	0.23
Acute Myeloid Leukemia Signaling	2.25	0.236
Melanocyte Development and Pigmentation Signaling	2.25	0.232
CXCR4 Signaling	2.25	0.201
fMLP Signaling in Neutrophils	2.23	0.217
PEDF Signaling	2.21	0.238
Signaling by Rho Family GTPases	2.18	0.183
p38 MAPK Signaling	2.17	0.217
GM-CSF Signaling	2.17	0.247
Chronic Myeloid Leukemia Signaling	2.16	0.223
Chemokine Signaling	2.12	0.25
G-Protein Coupled Receptor Signaling	2.08	0.178
Role of JAK1 and JAK3 in γc Cytokine Signaling	2.05	0.246
Ceramide Signaling	2.04	0.226
P2Y Purigenic Receptor Signaling Pathway	2.02	0.206

## Sheet: AD down-regulated
Ingenuity Canonical Pathways	-log(B-H p-value)	Ratio
EIF2 Signaling	14.4	0.305
Oxidative Phosphorylation	13.7	0.424
Mitochondrial Dysfunction	10.8	0.309
Protein Ubiquitination Pathway	10.1	0.248
Regulation of eIF4 and p70S6K Signaling	6.17	0.255
mTOR Signaling	3.79	0.206
Assembly of RNA Polymerase II Complex	3.22	0.32
Systemic Lupus Erythematosus Signaling	2.15	0.181

## Sheet: MCI up-regulated
Ingenuity Canonical Pathways	-log(B-H p-value)	Ratio
PPARα/RXRα Activation	4.16	0.301
PI3K Signaling in B Lymphocytes	3.62	0.315
Apoptosis Signaling	3.54	0.341
B Cell Receptor Signaling	3.54	0.275
PI3K/AKT Signaling	3.54	0.306
Role of NFAT in Regulation of the Immune Response	3.54	0.276
iCOS-iCOSL Signaling in T Helper Cells	3.54	0.312
Death Receptor Signaling	3.43	0.33
NGF Signaling	3.33	0.302
Lymphotoxin β Receptor Signaling	3.33	0.358
CD28 Signaling in T Helper Cells	3.33	0.298
PKCθ Signaling in T Lymphocytes	3.28	0.295
Integrin Signaling	3.28	0.255
Tec Kinase Signaling	3.19	0.27
JAK/Stat Signaling	3.15	0.325
T Cell Receptor Signaling	3.15	0.302
Erythropoietin Signaling	3.13	0.329
Production of Nitric Oxide and Reactive Oxygen Species in Macrophages	3.08	0.255
Acute Myeloid Leukemia Signaling	3.08	0.315
Regulation of IL-2 Expression in Activated and Anergic T Lymphocytes	3.04	0.329
PPAR Signaling	3.02	0.311
NF-κB Activation by Viruses	2.99	0.314
iNOS Signaling	2.99	0.395
Fcγ Receptor-mediated Phagocytosis in Macrophages and Monocytes	2.89	0.304
Phospholipase C Signaling	2.87	0.241
Virus Entry via Endocytic Pathways	2.87	0.294
NF-κB Signaling	2.86	0.256
CTLA4 Signaling in Cytotoxic T Lymphocytes	2.86	0.301
TWEAK Signaling	2.81	0.424
PTEN Signaling	2.81	0.28
IL-15 Signaling	2.76	0.316
Induction of Apoptosis by HIV1	2.68	0.339
TNFR1 Signaling	2.58	0.362
Phagosome Maturation	2.43	0.261
Caveolar-mediated Endocytosis Signaling	2.4	0.31
Natural Killer Cell Signaling	2.37	0.267
Thrombin Signaling	2.3	0.235
FLT3 Signaling in Hematopoietic Progenitor Cells	2.29	0.293
IL-10 Signaling	2.29	0.309
Gαq Signaling	2.29	0.247
GNRH Signaling	2.29	0.26
Germ Cell-Sertoli Cell Junction Signaling	2.29	0.243
Clathrin-mediated Endocytosis Signaling	2.29	0.235
Calcium-induced T Lymphocyte Apoptosis	2.28	0.327
Breast Cancer Regulation by Stathmin1	2.28	0.233
CD27 Signaling in Lymphocytes	2.24	0.333
Lipid Antigen Presentation by CD1	2.17	0.474
p70S6K Signaling	2.17	0.254
Actin Cytoskeleton Signaling	2.15	0.225
PDGF Signaling	2.15	0.278
D-myo-inositol (1,4,5)-Trisphosphate Biosynthesis	2.12	0.407
IL-1 Signaling	2.09	0.275
DNA Methylation and Transcriptional Repression Signaling	2.03	0.45
Th1 and Th2 Activation Pathway	2.03	0.233
RAR Activation	2.03	0.23
AMPK Signaling	2.03	0.23
Role of JAK1, JAK2 and TYK2 in Interferon Signaling	2.02	0.417
TNFR2 Signaling	2.02	0.393
GM-CSF Signaling	2.02	0.288
Prolactin Signaling	2.02	0.277
FAK Signaling	2.02	0.265
14-3-3-mediated Signaling	2.02	0.248
Role of RIG1-like Receptors in Antiviral Innate Immunity	2.01	0.341

## Sheet: MCI down-regulated
Ingenuity Canonical Pathways	-log(B-H p-value)	Ratio
EIF2 Signaling	10.4	0.343
Protein Ubiquitination Pathway	9.8	0.315
Oxidative Phosphorylation	9.68	0.446
Mitochondrial Dysfunction	8.56	0.355
Regulation of eIF4 and p70S6K Signaling	3.78	0.288
Assembly of RNA Polymerase II Complex	3.32	0.4
mTOR Signaling	2.78	0.253
RAN Signaling	2.21	0.562
Nucleotide Excision Repair Pathway	2.08	0.4

## Sheet: 19BrainRegion
Ingenuity Canonical Pathways	-log(B-H p-value)	Ratio
Protein Ubiquitination Pathway	13.2	0.467
EIF2 Signaling	11	0.462
Protein Kinase A Signaling	8.45	0.38
Integrin Signaling	7.67	0.425
Rac Signaling	6.92	0.487
Ephrin Receptor Signaling	6.92	0.437
mTOR Signaling	6.92	0.422
HIPPO signaling	6.92	0.529
Regulation of eIF4 and p70S6K Signaling	6.84	0.446
Breast Cancer Regulation by Stathmin1	6.54	0.414
Insulin Receptor Signaling	5.74	0.44
Signaling by Rho Family GTPases	5.7	0.385
Axonal Guidance Signaling	5.53	0.341
Ephrin B Signaling	5.52	0.521
Hypoxia Signaling in the Cardiovascular System	5.52	0.538
Gap Junction Signaling	5.38	0.412
IGF-1 Signaling	5.32	0.462
Clathrin-mediated Endocytosis Signaling	5.29	0.396
Molecular Mechanisms of Cancer	5.26	0.348
Actin Nucleation by ARP-WASP Complex	5.26	0.554
PTEN Signaling	5.26	0.445
Cardiac Hypertrophy Signaling	5.19	0.379
ERK/MAPK Signaling	5.18	0.392
CREB Signaling in Neurons	5.06	0.397
CXCR4 Signaling	5.06	0.406
HGF Signaling	5.06	0.443
Cardiac β-adrenergic Signaling	5.02	0.423
Actin Cytoskeleton Signaling	5.01	0.377
Glucocorticoid Receptor Signaling	4.91	0.359
Huntington's Disease Signaling	4.79	0.369
Relaxin Signaling	4.79	0.408
B Cell Receptor Signaling	4.74	0.389
Paxillin Signaling	4.59	0.434
CDK5 Signaling	4.42	0.444
fMLP Signaling in Neutrophils	4.38	0.421
Pancreatic Adenocarcinoma Signaling	4.37	0.424
VEGF Signaling	4.32	0.437
PAK Signaling	4.19	0.436
Role of NFAT in Cardiac Hypertrophy	4.13	0.375
Amyotrophic Lateral Sclerosis Signaling	4.11	0.423
Virus Entry via Endocytic Pathways	4.11	0.431
Thrombin Signaling	4.11	0.369
FAK Signaling	4.11	0.434
Sumoylation Pathway	4.11	0.438
Germ Cell-Sertoli Cell Junction Signaling	4.11	0.382
RhoGDI Signaling	4.11	0.382
Fcγ Receptor-mediated Phagocytosis in Macrophages and Monocytes	4.11	0.441
PDGF Signaling	4.11	0.444
Estrogen Receptor Signaling	4.06	0.406
GM-CSF Signaling	3.98	0.466
SAPK/JNK Signaling	3.91	0.423
Neuropathic Pain Signaling In Dorsal Horn Neurons	3.86	0.412
JAK/Stat Signaling	3.85	0.446
IL-8 Signaling	3.83	0.365
PI3K/AKT Signaling	3.83	0.403
RAN Signaling	3.78	0.75
Renal Cell Carcinoma Signaling	3.74	0.444
Macropinocytosis Signaling	3.74	0.444
RhoA Signaling	3.73	0.402
Role of Tissue Factor in Cancer	3.73	0.402
ILK Signaling	3.67	0.362
Wnt/β-catenin Signaling	3.67	0.373
HER-2 Signaling in Breast Cancer	3.66	0.432
Glioma Invasiveness Signaling	3.63	0.457
14-3-3-mediated Signaling	3.6	0.392
Tec Kinase Signaling	3.6	0.371
Gαq Signaling	3.6	0.375
p70S6K Signaling	3.52	0.389
Non-Small Cell Lung Cancer Signaling	3.52	0.442
EGF Signaling	3.51	0.456
Dopamine-DARPP32 Feedback in cAMP Signaling	3.44	0.37
Mouse Embryonic Stem Cell Pluripotency	3.43	0.406
GNRH Signaling	3.42	0.388
Aldosterone Signaling in Epithelial Cells	3.4	0.367
Glioma Signaling	3.36	0.4
Renin-Angiotensin Signaling	3.34	0.392
CCR3 Signaling in Eosinophils	3.34	0.385
NGF Signaling	3.33	0.393
Telomerase Signaling	3.28	0.396
Melanocyte Development and Pigmentation Signaling	3.27	0.411
GABA Receptor Signaling	3.27	0.448
UVA-Induced MAPK Signaling	3.21	0.402
Prolactin Signaling	3.21	0.422
Valine Degradation I	3.15	0.667
Semaphorin Signaling in Neurons	3.15	0.472
Epithelial Adherens Junction Signaling	3.14	0.37
Prostate Cancer Signaling	3.05	0.404
Remodeling of Epithelial Adherens Junctions	3.03	0.435
Amyloid Processing	3.02	0.471
CNTF Signaling	3.02	0.444
Androgen Signaling	2.99	0.387
GDNF Family Ligand-Receptor Interactions	2.94	0.421
Colorectal Cancer Metastasis Signaling	2.94	0.332
Myc Mediated Apoptosis Signaling	2.92	0.429
Endometrial Cancer Signaling	2.9	0.438
IL-2 Signaling	2.9	0.438
Tight Junction Signaling	2.86	0.353
Sphingosine-1-phosphate Signaling	2.83	0.374
Role of NFAT in Regulation of the Immune Response	2.83	0.346
Synaptic Long Term Potentiation	2.8	0.375
Production of Nitric Oxide and Reactive Oxygen Species in Macrophages	2.77	0.342
Chronic Myeloid Leukemia Signaling	2.74	0.385
Regulation of Actin-based Motility by Rho	2.73	0.396
G Beta Gamma Signaling	2.71	0.398
ErbB4 Signaling	2.71	0.417
ErbB Signaling	2.7	0.388
Agrin Interactions at Neuromuscular Junction	2.7	0.42
ErbB2-ErbB3 Signaling	2.7	0.42
P2Y Purigenic Receptor Signaling Pathway	2.68	0.364
ERK5 Signaling	2.68	0.429
Ephrin A Signaling	2.67	0.433
autophagy	2.67	0.433
Neurotrophin/TRK Signaling	2.64	0.408
PPARα/RXRα Activation	2.63	0.343
T Cell Receptor Signaling	2.63	0.376
G-Protein Coupled Receptor Signaling	2.62	0.32
AMPK Signaling	2.61	0.339
NRF2-mediated Oxidative Stress Response	2.59	0.337
Cellular Effects of Sildenafil (Viagra)	2.59	0.362
Nitric Oxide Signaling in the Cardiovascular System	2.59	0.372
α-Adrenergic Signaling	2.53	0.391
Growth Hormone Signaling	2.47	0.395
Hereditary Breast Cancer Signaling	2.47	0.352
Thrombopoietin Signaling	2.47	0.415
Fatty Acid β-oxidation I	2.42	0.5
Sertoli Cell-Sertoli Cell Junction Signaling	2.42	0.337
Phospholipase C Signaling	2.39	0.321
Reelin Signaling in Neurons	2.38	0.38
Ovarian Cancer Signaling	2.34	0.347
Phagosome Maturation	2.34	0.347
BMP signaling pathway	2.34	0.395
Endothelin-1 Signaling	2.32	0.332
Dopamine Receptor Signaling	2.24	0.39
Cholecystokinin/Gastrin-mediated Signaling	2.19	0.366
Caveolar-mediated Endocytosis Signaling	2.18	0.394
Melanoma Signaling	2.18	0.418
Docosahexaenoic Acid (DHA) Signaling	2.16	0.423
Neuregulin Signaling	2.15	0.375
FLT3 Signaling in Hematopoietic Progenitor Cells	2.12	0.376
Role of p14/p19ARF in Tumor Suppression	2.12	0.442
Gα12/13 Signaling	2.11	0.346
CTLA4 Signaling in Cytotoxic T Lymphocytes	2.09	0.364
Glioblastoma Multiforme Signaling	2.07	0.333
Erythropoietin Signaling	2.07	0.38
LPS-stimulated MAPK Signaling	2.05	0.372
NF-κB Activation by Viruses	2.05	0.372
CD28 Signaling in T Helper Cells	2.05	0.344
Telomere Extension by Telomerase	2.04	0.6
IL-3 Signaling	2.02	0.373
