# Supplementary material for: Systematic Analysis and Biomarker Study for Alzheimer’s Disease
Source: Sci Rep. 2018 Nov 26;8:17394. doi: 10.1038/s41598-018-35789-3 (PMC6255913; doi:10.1038/s41598-018-35789-3)
Supplement: Supplementary file 4 — Supplementary Table 4 [file 41598_2018_35789_MOESM4_ESM.xlsx]

## Sheet: Brian DEGs in 17 regions
The digital suffix 0-16 indicates the 17 brain regions: "AC" "CN" "DPC" "FP" "HIP" "IFG" "ITG" "MTG" "OVC" "PHG" "PCC" "PG" "PC" "PU" "SPL" "STG" "TP"
Probesets	Entrez.Gene	Symbol	logFC	P.Value	logFC.1	P.Value.1	logFC.2	P.Value.2	logFC.3	P.Value.3	logFC.4	P.Value.4	logFC.5	P.Value.5	logFC.6	P.Value.6	logFC.7	P.Value.7	logFC.8	P.Value.8	logFC.9	P.Value.9	logFC.10	AveExpr.10	t.10	P.Value.10	adj.P.Val.10	logFC.11	P.Value.11	logFC.12	P.Value.12	logFC.13	P.Value.13	logFC.14	AveExpr.14	t.14	P.Value.14	logFC.15	P.Value.15	logFC.16	P.Value.16
209348_s_at	4094	MAF	0.345	0.00112	-0.028	0.809	0.0763	0.475	0.15	0.145	0.0344	0.779	-0.0182	0.877	0.0862	0.432	0.168	0.126	0.128	0.3	0.247	0.0195	0.158	5.21	1.44	0.149	1	0.131	0.385	0.179	0.14	0.0649	0.574	0.000832	5.21	0.00674	0.995	0.0799	0.439	0.327	0.00345
200926_at	6228	RPS23	0.237	0.00709	0.000195	0.998	0.077	0.386	0.152	0.0751	0.0517	0.613	0.162	0.0984	0.224	0.0144	0.123	0.178	0.0256	0.803	0.317	0.00032	0.0214	11.7	0.235	0.814	1	-0.0876	0.487	0.183	0.0704	0.0419	0.662	-0.146	11.7	-1.43	0.154	0.147	0.0881	0.253	0.00653
202883_s_at	5519	PPP2R1B	0.323	0.00871	-0.257	0.0567	0.289	0.02	0.195	0.103	0.0545	0.703	-0.055	0.687	0.312	0.0146	0.158	0.218	0.125	0.386	0.177	0.148	0.0494	6.61	0.387	0.699	1	0.0941	0.593	0.168	0.234	-0.0917	0.494	0.0504	6.61	0.352	0.725	0.0212	0.86	0.332	0.0106
202808_at	54838	WBP1L	0.335	0.000727	-0.121	0.266	0.26	0.00947	0.259	0.00705	0.125	0.279	0.157	0.155	0.126	0.222	0.0593	0.565	0.036	0.756	0.155	0.116	0.00185	7.68	0.018	0.986	1	-0.00291	0.984	0.00494	0.965	-0.000874	0.994	0.0562	7.68	0.486	0.627	0.0647	0.503	0.262	0.0124
223536_at	84249	PSD2	0.379	0.00275	0.214	0.123	0.295	0.021	0.272	0.0269	0.208	0.156	0.273	0.052	0.292	0.0262	0.228	0.0828	0.276	0.062	0.101	0.422	-0.00396	9.02	-0.0302	0.976	0.996	0.175	0.334	0.302	0.0378	0.191	0.165	-0.142	9.02	-0.965	0.335	0.129	0.296	0.33	0.0136
209297_at	6453	ITSN1	0.186	0.00416	0.0228	0.748	-0.0358	0.585	0.105	0.0944	0.194	0.0102	0.065	0.367	0.0345	0.608	0.138	0.0412	0.0135	0.859	0.0601	0.353	0.0789	7.86	1.17	0.241	1	0.0768	0.408	0.287	0.000125	0.123	0.0827	0.00843	7.86	0.112	0.911	0.104	0.101	0.169	0.0138
227810_at	148156	ZNF558	0.186	0.00974	-0.0436	0.582	0.181	0.013	0.15	0.032	0.0333	0.691	0.0577	0.471	0.109	0.144	0.0667	0.374	0.108	0.199	0.0227	0.752	0.163	6.55	2.18	0.0295	0.923	-0.00596	0.954	-0.109	0.191	0.00495	0.95	-0.0769	6.55	-0.914	0.361	-0.0416	0.555	0.185	0.0155
213629_x_at	4494	MT1F	0.594	0.00359	0.256	0.253	0.508	0.0138	0.734	0.00022	0.558	0.0186	0.518	0.0225	0.3	0.156	0.431	0.0425	0.244	0.306	0.524	0.01	0.493	10.2	2.33	0.02	1	0.269	0.357	0.569	0.0154	0.216	0.332	0.145	10.2	0.612	0.541	0.418	0.0359	0.519	0.016
212120_at	23433	RHOQ	0.332	0.00752	-0.0711	0.601	0.162	0.196	0.205	0.0882	0.383	0.008	0.00152	0.991	0.201	0.119	0.192	0.137	0.234	0.107	0.117	0.343	0.121	8.74	0.939	0.348	1	0.0257	0.885	0.241	0.0914	0.0255	0.851	-0.215	8.74	-1.48	0.138	-0.0787	0.516	0.307	0.0192
204979_s_at	6450	SH3BGR	0.269	0.00741	0.0816	0.458	0.256	0.0118	0.204	0.0365	0.208	0.0751	0.127	0.255	0.278	0.00767	0.261	0.0125	0.0192	0.87	0.312	0.00187	0.0358	6.48	0.344	0.731	1	0.075	0.601	0.0915	0.428	0.127	0.245	0.0434	6.48	0.371	0.711	0.0329	0.737	0.238	0.0248
217165_x_at	4494	MT1F	0.48	0.00738	0.0804	0.683	0.298	0.0999	0.52	0.00288	0.44	0.0347	0.441	0.0272	0.169	0.363	0.32	0.0869	0.226	0.281	0.38	0.0337	0.29	10.4	1.56	0.119	1	0.102	0.691	0.314	0.127	0.169	0.386	-0.0164	10.4	-0.0783	0.938	0.354	0.0431	0.423	0.0257
205151_s_at	9865	TRIL	0.494	0.00218	0.162	0.359	0.294	0.0711	0.348	0.026	0.328	0.0799	0.196	0.275	0.328	0.0502	0.252	0.134	0.0453	0.81	0.452	0.00496	0.128	7.55	0.763	0.446	1	0.504	0.0291	0.482	0.00938	0.253	0.151	0.0998	7.55	0.531	0.596	0.0638	0.685	0.36	0.0345
209307_at	23075	SWAP70	0.372	0.00243	-0.194	0.149	0.17	0.168	0.169	0.154	0.238	0.0942	-0.0836	0.539	0.208	0.103	0.18	0.158	0.0932	0.515	0.0944	0.439	0.268	4.84	2.11	0.0353	1	0.168	0.338	0.175	0.213	-0.0274	0.837	-0.0374	4.84	-0.262	0.793	-0.086	0.472	0.273	0.0348
217197_x_at	90634	N4BP2L1	-0.233	0.00973	0.0449	0.65	-0.348	0.000139	-0.112	0.2	-0.12	0.252	0.0488	0.626	-0.176	0.0604	-0.124	0.187	-0.0232	0.826	-0.0276	0.758	0.0759	6.36	0.812	0.417	1	-0.0538	0.676	0.222	0.0319	-0.00103	0.992	0.119	6.36	1.13	0.259	-0.0353	0.688	-0.2	0.0352
203935_at	90	ACVR1	0.208	0.00808	-0.0864	0.315	0.0603	0.447	0.0898	0.238	0.109	0.231	-0.0385	0.659	0.0416	0.609	0.119	0.146	0.0124	0.892	0.0145	0.852	0.0653	5.52	0.803	0.422	1	0.209	0.0626	0.015	0.868	-0.00506	0.953	-0.0864	5.52	-0.945	0.345	-0.153	0.0455	0.172	0.0381
214577_at	4131	MAP1B	-0.778	0.00212	0.00476	0.986	-0.424	0.0973	-0.346	0.159	-0.000482	0.999	-0.361	0.199	0.0412	0.875	-0.152	0.564	0.274	0.354	-0.147	0.559	0.249	5.59	0.948	0.343	1	-0.134	0.712	0.779	0.00754	-0.267	0.333	0.242	5.59	0.82	0.413	-0.225	0.362	-0.553	0.0386
201308_s_at	55752	2011-09-01	-0.208	0.00555	-0.0554	0.501	-0.0925	0.223	-0.0435	0.55	-0.0064	0.941	-0.0648	0.437	-0.0922	0.237	-0.0487	0.534	0.00334	0.97	-0.0109	0.884	0.0579	4.48	0.742	0.458	1	0.0297	0.782	0.118	0.171	-0.0647	0.429	0.0249	4.48	0.285	0.776	0.0423	0.564	-0.162	0.0405
205923_at	5649	RELN	0.477	0.0016	0.25	0.132	0.471	0.00208	0.345	0.0186	0.212	0.227	0.27	0.108	0.128	0.414	0.326	0.0387	0.434	0.0141	0.672	9.31e-06	0.177	7.18	1.13	0.258	1	0.507	0.0191	0.339	0.0508	0.208	0.206	0.245	7.18	1.39	0.165	0.188	0.203	0.324	0.0421
200845_s_at	9588	PRDX6	0.431	0.00808	0.0249	0.889	0.282	0.086	0.316	0.045	0.476	0.0118	0.0523	0.772	0.386	0.0224	0.197	0.244	0.0692	0.716	0.449	0.00565	0.0687	8.98	0.407	0.684	1	0.371	0.111	0.228	0.223	0.215	0.226	-0.141	8.98	-0.745	0.456	0.152	0.339	0.343	0.0458
208623_s_at	7430	EZR	0.542	0.00178	-0.146	0.442	0.463	0.00842	0.282	0.0944	0.455	0.0242	0.0721	0.708	0.547	0.00244	0.32	0.0764	0.211	0.299	0.182	0.291	0.0957	7.47	0.532	0.595	1	0.373	0.133	0.448	0.0247	-0.275	0.146	-0.14	7.47	-0.692	0.489	0.18	0.287	0.363	0.0477
213085_s_at	23286	WWC1	0.448	7.46e-05	0.0415	0.737	0.387	0.000702	0.321	0.00343	0.369	0.00489	0.221	0.0784	0.146	0.213	0.187	0.111	0.249	0.0587	0.197	0.0798	0.127	7.48	1.08	0.279	1	0.0156	0.923	0.0882	0.496	0.07	0.569	0.163	7.48	1.24	0.214	0.258	0.0194	0.233	0.0504
218699_at	8934	RAB7L1	0.314	0.00619	-0.132	0.296	0.217	0.0615	0.198	0.0747	0.265	0.0465	0.03	0.813	0.174	0.143	0.217	0.0698	0.136	0.31	0.272	0.0173	0.0473	7.29	0.397	0.691	1	0.221	0.178	0.14	0.288	0.114	0.362	-0.147	7.29	-1.1	0.271	-0.103	0.355	0.237	0.0505
215739_s_at	10426	TUBGCP3	-0.167	0.000184	0.00301	0.951	-0.0428	0.343	0.0318	0.462	-0.00905	0.861	0.0207	0.676	0.0303	0.512	-0.0273	0.557	0.0496	0.341	0.0126	0.777	0.026	4.08	0.562	0.574	1	0.0158	0.805	0.0952	0.0637	0.0626	0.198	0.0531	4.08	1.02	0.308	-0.0316	0.468	-0.0921	0.0509
203961_at	10529	NEBL	0.531	6.45e-05	-0.0324	0.823	0.385	0.00407	0.287	0.0254	0.486	0.00164	0.223	0.13	0.386	0.00512	0.36	0.00911	0.294	0.0577	0.322	0.0149	0.0637	10	0.463	0.643	1	0.113	0.551	0.332	0.0292	0.0298	0.837	-0.131	10	-0.847	0.397	0.214	0.0974	0.27	0.0535
235867_at	2947	GSTM3	0.301	0.0075	0.315	0.0109	0.207	0.0687	0.264	0.0157	0.59	7.19e-06	0.183	0.144	0.429	0.000251	0.373	0.0015	0.16	0.224	0.136	0.224	0.13	7.89	1.11	0.267	0.923	0.185	0.251	-0.133	0.304	0.199	0.105	-0.105	7.89	-0.802	0.423	0.198	0.072	0.228	0.0554
228214_at	55553	SOX6	0.228	0.0018	-0.02	0.802	0.061	0.407	0.151	0.0323	0.0657	0.437	0.0346	0.669	0.0702	0.353	-0.0681	0.37	-0.127	0.137	0.0339	0.641	-0.00252	7.46	-0.0333	0.973	0.995	0.0792	0.448	0.175	0.0367	0.0623	0.433	0.032	7.46	0.377	0.706	0.15	0.0346	0.145	0.059
227498_at	55553	SOX6	0.325	0.00348	-0.0532	0.663	0.051	0.65	0.236	0.0289	0.0486	0.707	-0.114	0.358	0.316	0.00626	0.107	0.356	0.043	0.741	0.0231	0.835	0.0347	6.6	0.3	0.764	0.964	0.127	0.423	0.13	0.31	-0.0709	0.559	-0.198	6.6	-1.52	0.128	0.0513	0.636	0.222	0.0594
201579_at	2195	FAT1	0.342	0.00728	-0.153	0.274	0.107	0.404	0.343	0.00557	0.253	0.0869	0.0277	0.845	0.105	0.426	0.266	0.0453	-0.0123	0.934	0.203	0.11	0.0491	7.44	0.371	0.711	1	0.238	0.191	0.435	0.00308	-0.0703	0.613	-0.0971	7.44	-0.654	0.514	0.00553	0.964	0.248	0.0657
201967_at	10180	RBM6	0.38	0.00276	0.116	0.404	0.416	0.00121	0.16	0.192	0.281	0.057	0.187	0.185	0.253	0.0547	0.274	0.0385	0.311	0.036	0.138	0.274	-0.0128	7.17	-0.0973	0.923	1	0.0219	0.904	0.144	0.324	0.193	0.163	0.0546	7.17	0.369	0.712	0.117	0.345	0.246	0.0658
201826_s_at	51097	SCCPDH	0.297	0.00208	0.0267	0.801	0.149	0.127	0.0387	0.679	0.0637	0.569	0.0704	0.511	0.0935	0.35	0.0476	0.636	-0.0864	0.443	0.0774	0.42	-0.0502	7.82	-0.501	0.616	1	0.0452	0.743	0.0533	0.63	-0.00599	0.955	-0.193	7.82	-1.72	0.0867	-0.00496	0.958	0.184	0.0702
207971_s_at	23177	CEP68	-0.293	0.0037	-0.0347	0.754	-0.0958	0.347	-0.112	0.254	0.0158	0.892	-0.0649	0.563	-0.0973	0.353	-0.0939	0.371	-0.0299	0.8	-0.0331	0.742	0.0343	5.84	0.327	0.743	1	-0.237	0.101	0.275	0.018	0.0313	0.776	0.174	5.84	1.48	0.14	-0.0334	0.734	-0.193	0.0705
242565_x_at	54059	YBEY	-0.397	0.00703	-0.0673	0.677	-0.0896	0.547	-0.151	0.292	-0.166	0.332	-0.0389	0.812	0.138	0.366	-0.00619	0.968	0.13	0.451	-0.228	0.121	-0.0928	6.44	-0.607	0.544	0.934	-0.172	0.415	0.17	0.316	-0.0631	0.694	-0.115	6.44	-0.666	0.505	-0.202	0.159	-0.281	0.0706
218298_s_at	80017	C14orf159	0.28	0.00871	-0.0477	0.683	0.15	0.165	-0.00992	0.924	0.0766	0.536	-0.0321	0.787	0.0705	0.524	-0.0308	0.782	0.0589	0.636	0.0232	0.827	-0.123	7.97	-1.11	0.268	1	-0.0704	0.645	0.199	0.105	-0.0884	0.447	-0.105	7.97	-0.841	0.401	-0.169	0.106	-0.203	0.0718
35776_at	6453	ITSN1	0.26	0.00571	-0.00792	0.939	0.12	0.207	0.325	0.000399	0.179	0.101	0.132	0.207	0.205	0.0358	0.195	0.0471	0.0115	0.917	0.189	0.044	0.119	7.82	1.21	0.225	1	-0.0634	0.638	0.227	0.0358	0.112	0.277	0.142	7.82	1.3	0.195	0.268	0.0036	0.178	0.0732
244403_at	23418	CRB1	0.371	0.00188	-0.0255	0.845	0.213	0.078	0.245	0.0342	0.401	0.00391	-0.00399	0.976	0.285	0.0216	0.192	0.123	0.172	0.217	0.269	0.0238	0.102	5.29	0.827	0.409	0.923	0.298	0.0816	0.239	0.0812	-0.00177	0.989	-0.102	5.29	-0.733	0.464	0.091	0.435	0.225	0.0737
219255_x_at	55540	IL17RB	0.455	0.00158	0.0415	0.793	0.149	0.306	0.239	0.0867	0.36	0.0316	0.268	0.0943	0.0933	0.532	0.315	0.036	0.057	0.735	0.0394	0.783	0.12	7.13	0.805	0.421	1	0.199	0.333	0.335	0.0433	0.339	0.0308	-0.0403	7.13	-0.24	0.81	0.00989	0.944	0.271	0.0745
203841_x_at	22924	MAPRE3	-0.545	0.00873	0.288	0.207	-0.302	0.15	-0.355	0.0787	0.115	0.634	0.185	0.423	0.0244	0.91	-0.17	0.433	0.1	0.68	-0.251	0.225	0.0703	5.99	0.326	0.745	1	-0.00778	0.979	0.471	0.0489	0.0688	0.761	0.452	5.99	1.86	0.0627	-0.157	0.44	-0.391	0.0748
201219_at	1488	CTBP2	0.24	0.00384	0.133	0.145	0.0292	0.728	0.199	0.0138	0.0977	0.31	0.056	0.543	0.0794	0.356	0.0789	0.362	-0.0537	0.58	0.0138	0.867	-0.0523	5.8	-0.607	0.544	1	0.163	0.171	-0.025	0.793	0.122	0.179	-0.0183	5.8	-0.189	0.85	0.0295	0.716	0.155	0.0763
212944_at	6526	SLC5A3	0.644	0.0038	0.213	0.383	0.307	0.171	0.405	0.0601	0.6	0.0202	0.062	0.802	0.0425	0.854	0.275	0.235	0.346	0.184	0.358	0.106	0.491	6.62	2.13	0.0335	1	0.387	0.224	0.211	0.408	0.0507	0.834	0.0604	6.62	0.233	0.816	0.0257	0.906	0.416	0.0764
235155_at	56898	BDH2	0.336	0.000923	0.152	0.171	0.211	0.0391	0.313	0.00146	0.223	0.0584	0.0517	0.645	0.187	0.0744	0.257	0.0147	0.0443	0.708	-0.0422	0.676	0.0676	4.75	0.643	0.52	0.932	0.106	0.465	0.0975	0.402	0.202	0.0674	-0.0766	4.75	-0.649	0.516	0.0199	0.84	0.188	0.078
213164_at	6526	SLC5A3	0.611	0.00718	0.339	0.174	0.268	0.243	0.257	0.244	0.694	0.00869	0.142	0.575	0.136	0.563	0.0737	0.755	0.561	0.0352	0.317	0.162	0.535	8.3	2.27	0.0238	1	0.163	0.617	0.649	0.0133	0.112	0.65	0.133	8.3	0.5	0.617	0.265	0.232	0.423	0.0782
212371_at	51029	DESI2	0.331	0.00469	-0.026	0.839	0.049	0.679	0.0667	0.557	0.13	0.34	-0.129	0.323	0.0342	0.778	0.139	0.253	0.086	0.53	0.276	0.0181	0.0551	6.45	0.453	0.65	1	0.131	0.435	0.00559	0.967	0.0241	0.85	-0.127	6.45	-0.932	0.352	-0.141	0.217	0.218	0.0782
227376_at	2737	GLI3	0.27	0.00454	0.000128	0.999	0.103	0.283	0.191	0.0384	-0.0292	0.791	0.153	0.148	0.141	0.153	0.14	0.156	0.00309	0.978	-0.0174	0.854	0.0932	6.08	0.945	0.345	0.923	0.0882	0.517	0.14	0.202	-0.0296	0.775	-0.0507	6.08	-0.457	0.648	-0.0109	0.906	0.175	0.0822
212493_s_at	29072	SETD2	0.263	0.00352	0.0066	0.947	0.15	0.0997	0.133	0.128	0.144	0.169	0.019	0.849	0.103	0.269	0.0181	0.847	0.107	0.308	0.064	0.476	0.0949	7.64	1.01	0.311	1	0.0788	0.541	-0.0604	0.56	0.0229	0.816	0.0105	7.64	0.0999	0.92	-0.101	0.253	0.165	0.0829
228308_at	51303	FKBP11	-0.323	0.00153	0.168	0.134	-0.0866	0.4	-0.15	0.128	-0.0724	0.54	-0.275	0.0153	0.165	0.118	-0.126	0.235	0.074	0.534	-0.0769	0.448	0.0274	7.26	0.26	0.795	0.975	0.0425	0.77	0.0685	0.558	-0.058	0.601	0.0659	7.26	0.555	0.579	-0.0923	0.353	-0.184	0.0868
218389_s_at	51107	APH1A	-0.266	0.00258	0.00101	0.992	0.0257	0.773	-0.0164	0.848	-0.0272	0.791	-0.245	0.0127	0.121	0.187	0.066	0.473	-0.0197	0.848	-0.0368	0.676	-0.0869	6.1	-0.948	0.343	1	0.0933	0.46	0.0793	0.435	0.00286	0.976	0.0275	6.1	0.267	0.79	-0.0217	0.801	-0.159	0.0885
224780_at	84991	RBM17	0.365	0.00426	0.0543	0.698	0.364	0.00482	0.271	0.0287	0.376	0.0113	-0.042	0.767	0.611	4.6e-06	0.302	0.0233	0.371	0.0131	0.203	0.111	0.0129	7.6	0.0976	0.922	0.986	0.148	0.418	-0.0252	0.864	0.0692	0.619	-0.248	7.6	-1.67	0.0956	-0.164	0.189	0.229	0.09
224551_s_at	57731	SPTBN4	-0.325	0.00466	-0.0402	0.749	-0.0397	0.732	-0.165	0.138	0.0317	0.812	0.145	0.254	0.125	0.294	0.0668	0.576	0.215	0.109	0.0927	0.418	-0.0419	5.23	-0.352	0.725	0.961	-0.0985	0.549	0.342	0.00974	-0.0365	0.77	0.0564	5.23	0.421	0.674	0.161	0.15	-0.204	0.092
225913_at	79834	PEAK1	0.244	0.00957	0.181	0.08	0.165	0.082	0.0356	0.696	0.126	0.249	0.0516	0.621	0.354	0.000307	0.106	0.281	0.234	0.0333	0.0208	0.824	-0.0391	9.06	-0.4	0.689	0.956	0.00291	0.983	0.0506	0.64	-0.0515	0.616	-0.145	9.06	-1.32	0.187	-0.106	0.25	0.166	0.0939
210216_x_at	5810	RAD1	-0.187	0.00969	0.0145	0.854	-0.166	0.0226	0.022	0.753	-0.118	0.16	-0.0199	0.804	-0.0898	0.23	0.0097	0.897	-0.0608	0.471	-0.0309	0.668	0.094	7.05	1.25	0.21	1	-0.114	0.271	0.179	0.0315	0.0641	0.415	0.0359	7.05	0.427	0.67	-0.0749	0.288	0.127	0.0965
214906_x_at	90634	N4BP2L1	-0.223	0.00697	0.0746	0.411	-0.2	0.0166	-0.0232	0.772	-0.0827	0.389	0.00929	0.919	-0.226	0.00848	-0.11	0.2	0.0105	0.913	-0.0203	0.806	-0.00877	7.26	-0.102	0.919	1	0.103	0.384	0.264	0.00562	0.00738	0.935	0.0893	7.26	0.926	0.355	0.092	0.254	-0.145	0.0965
201248_s_at	6721	SREBF2	-0.348	0.00331	-0.102	0.432	-0.192	0.109	-0.199	0.0829	-0.0123	0.929	-0.0984	0.454	-0.0487	0.691	-0.197	0.11	0.0447	0.746	0.00268	0.982	-0.0524	7.93	-0.427	0.669	1	-0.00236	0.989	0.268	0.0489	-0.0688	0.593	0.0814	7.93	0.59	0.555	0.011	0.924	-0.207	0.0974
213347_x_at	6191	RPS4X	0.267	0.00566	-0.0467	0.659	0.0999	0.305	0.0865	0.355	0.106	0.345	0.108	0.311	0.0389	0.697	0.00467	0.963	-0.0113	0.92	0.217	0.0242	-0.0913	11	-0.913	0.362	1	-0.0466	0.735	-0.0743	0.503	0.0583	0.579	-0.157	11	-1.4	0.163	0.121	0.197	0.165	0.105
207629_s_at	9181	ARHGEF2	-0.31	0.00268	0.0496	0.661	0.0751	0.471	-0.0173	0.863	-0.098	0.414	0.0441	0.701	0.125	0.243	-0.0542	0.614	0.000407	0.997	-0.0477	0.643	-0.0156	6.94	-0.145	0.884	1	-0.0633	0.668	0.134	0.261	-0.115	0.307	0.145	6.94	1.21	0.228	0.172	0.0872	-0.176	0.107
205895_s_at	9221	NOLC1	-0.322	0.00411	-0.00976	0.937	-0.258	0.0227	-0.102	0.347	0.0777	0.55	-0.00951	0.939	0.0172	0.883	-0.099	0.396	-0.128	0.329	0.00344	0.975	-0.00729	6.37	-0.0627	0.95	1	-0.13	0.418	0.165	0.201	-0.122	0.318	0.041	6.37	0.314	0.754	-0.0504	0.644	-0.19	0.108
235614_at	256472	TMEM151A	-0.321	0.00929	-0.0263	0.846	0.27	0.0301	-0.0916	0.443	-0.169	0.237	-0.0631	0.645	0.222	0.0822	0.134	0.296	0.0383	0.79	0.193	0.117	-0.304	7.14	-2.38	0.0176	0.923	-0.0791	0.654	0.0231	0.871	-0.0871	0.517	0.159	7.14	1.1	0.27	0.0121	0.92	-0.209	0.109
209015_s_at	10049	DNAJB6	0.418	0.00119	0.129	0.361	0.126	0.333	0.133	0.286	0.161	0.282	0.176	0.218	0.132	0.325	0.178	0.185	0.113	0.453	0.172	0.18	0.214	4.99	1.6	0.111	1	0.209	0.258	0.062	0.676	0.173	0.219	-0.00123	4.99	-0.00819	0.993	0.188	0.135	0.217	0.111
210933_s_at	6624	FSCN1	-0.367	0.00344	-0.175	0.203	0.135	0.287	-0.158	0.193	-0.129	0.375	0.0954	0.493	4.79e-05	1	-0.234	0.0733	0.121	0.41	-0.203	0.104	-0.15	6.59	-1.15	0.25	1	0.0266	0.882	0.11	0.443	-0.258	0.0592	0.0231	6.59	0.158	0.874	-0.45	0.000249	-0.209	0.115
219872_at	51313	FAM198B	-0.272	0.00761	-0.169	0.132	-0.182	0.0776	-0.12	0.224	-0.0079	0.947	-0.0589	0.603	-0.0829	0.433	-0.118	0.268	-0.00869	0.942	0.105	0.304	0.0329	4.69	0.311	0.756	1	0.0318	0.827	0.286	0.0149	-0.111	0.317	0.0297	4.69	0.249	0.803	-0.0061	0.951	-0.168	0.118
210872_x_at	8522	GAS7	-0.582	0.000532	0.142	0.439	-0.267	0.115	-0.292	0.0729	-0.234	0.229	-0.0281	0.88	-0.0413	0.812	-0.175	0.315	0.0215	0.913	-0.09	0.59	0.0714	6.68	0.411	0.681	1	0.0033	0.989	0.398	0.039	-0.0262	0.886	0.123	6.68	0.628	0.53	-0.153	0.35	-0.276	0.119
214336_s_at	1314	COPA	-0.324	0.00978	-0.104	0.447	-0.233	0.066	0.0107	0.93	-0.0876	0.547	0.0935	0.502	-0.00764	0.953	-0.0342	0.793	-0.00971	0.947	0.147	0.238	0.0517	5.36	0.398	0.691	1	0.27	0.133	0.283	0.0496	0.025	0.855	0.148	5.36	1.01	0.313	0.171	0.162	-0.206	0.119
239208_s_at	54059	YBEY	-0.33	0.00737	-0.192	0.154	-0.0888	0.475	-0.0202	0.866	-0.115	0.42	-0.134	0.326	0.184	0.15	-0.0505	0.693	-0.0875	0.542	-0.156	0.203	-0.0689	6.58	-0.54	0.59	0.94	-0.164	0.351	0.0478	0.735	-0.0509	0.704	-0.0775	6.58	-0.541	0.589	-0.297	0.0134	-0.202	0.12
212574_x_at	91304	TMEM259	-0.566	0.000107	0.192	0.23	-0.0765	0.603	-0.22	0.119	0.0895	0.597	0.094	0.561	0.156	0.303	0.0212	0.889	-0.0019	0.991	-0.0844	0.561	0.0302	5.56	0.2	0.842	1	0.232	0.265	0.271	0.105	0.21	0.186	0.123	5.56	0.723	0.47	0.0516	0.717	-0.236	0.125
226520_at	84458	LCOR	0.438	0.00428	-0.0187	0.911	0.169	0.274	0.12	0.42	0.245	0.169	-0.245	0.15	0.45	0.00477	0.0597	0.708	0.434	0.0154	-0.0764	0.616	-0.049	6.48	-0.308	0.758	0.962	0.165	0.452	0.0413	0.814	-0.24	0.15	-0.414	6.48	-2.32	0.0208	-0.369	0.0136	0.248	0.125
214686_at	10781	ZNF266	0.265	0.00407	0.104	0.302	0.117	0.21	0.103	0.248	-0.00359	0.973	0.103	0.314	0.0804	0.4	0.281	0.00351	0.0419	0.697	0.00869	0.925	-0.0765	6.95	-0.8	0.424	1	0.107	0.419	0.117	0.271	0.0146	0.884	-0.08	6.95	-0.744	0.457	-0.0622	0.489	0.149	0.125
202365_at	84747	UNC119B	0.393	3.68e-05	-0.215	0.0391	0.175	0.0676	0.164	0.0753	0.156	0.158	0.0119	0.91	0.101	0.306	0.175	0.0769	0.124	0.264	0.135	0.153	0.00247	7.14	0.0251	0.98	1	0.0123	0.928	0.0832	0.446	-0.129	0.212	-0.105	7.14	-0.953	0.341	-0.00126	0.989	0.153	0.126
201494_at	5547	PRCP	0.274	0.00293	-0.0209	0.836	0.145	0.118	0.151	0.09	0.233	0.0294	0.0952	0.352	0.136	0.155	0.125	0.193	0.0761	0.479	0.299	0.00115	0.13	8.31	1.36	0.174	1	0.0449	0.733	0.101	0.342	0.0495	0.622	-0.0839	8.31	-0.782	0.435	0.0259	0.773	0.146	0.134
226892_at	26148	C10orf12	0.24	0.00215	0.0332	0.699	0.148	0.0608	0.00546	0.943	0.0737	0.416	-0.106	0.223	0.21	0.00979	-0.0405	0.618	0.0216	0.813	0.0422	0.587	-0.0199	6.65	-0.246	0.806	0.976	0.0678	0.544	-0.0751	0.403	0.0706	0.407	-0.101	6.65	-1.11	0.268	0.0132	0.863	0.122	0.14
227820_at	4943	TBC1D25	-0.245	0.00237	-0.0293	0.741	0.0587	0.471	0.0817	0.296	0.0339	0.717	0.124	0.166	-0.013	0.877	0.109	0.193	-0.0924	0.327	0.195	0.0152	-0.0486	7.62	-0.581	0.561	0.934	-0.0873	0.449	-0.00881	0.924	0.0352	0.688	0.139	7.62	1.48	0.14	0.103	0.189	-0.126	0.14
212718_at	10914	PAPOLA	0.511	0.00242	-0.174	0.345	0.333	0.0501	0.252	0.122	0.0858	0.66	0.0563	0.763	0.277	0.113	0.206	0.239	0.199	0.312	0.205	0.222	0.0775	7.91	0.444	0.657	1	0.114	0.636	0.17	0.379	-0.0976	0.595	-0.223	7.91	-1.14	0.256	0.0433	0.792	0.262	0.141
200028_s_at	56910	STARD7	0.378	0.00142	0.14	0.377	0.344	0.00414	0.165	0.151	0.316	0.0217	0.113	0.392	0.55	0.000248	0.195	0.194	0.469	0.00538	0.353	0.0141	0.081	9.38	0.659	0.51	1	0.11	0.594	0.17	0.211	0.0323	0.837	-0.162	9.2	-0.964	0.336	-0.0973	0.488	0.184	0.141
234021_at	24139	EML2	-0.293	0.00896	-0.00554	0.964	0.12	0.29	-0.0107	0.922	-0.119	0.361	0.0693	0.579	0.0266	0.819	0.075	0.521	-0.00999	0.939	0.184	0.0997	0.0264	5.6	0.226	0.821	0.977	-0.158	0.327	0.234	0.0703	0.00751	0.951	0.137	5.6	1.05	0.295	0.276	0.0119	-0.173	0.143
58780_s_at	55701	ARHGEF40	0.288	0.00613	-0.0472	0.682	0.206	0.0522	0.187	0.0662	0.187	0.125	0.15	0.199	0.204	0.0611	0.206	0.06	0.0975	0.427	0.304	0.00377	0.116	6.02	1.06	0.288	1	0.0869	0.563	0.175	0.147	0.125	0.277	0.191	6.02	1.56	0.12	0.0745	0.467	0.162	0.144
230832_at	23168	RTF1	-0.212	0.000623	-0.0517	0.446	-0.0539	0.388	-0.0492	0.412	0.00849	0.906	0.0296	0.667	-0.0426	0.506	-0.0475	0.461	-0.181	0.0124	0.00256	0.967	-0.0414	7.16	-0.646	0.519	0.932	0.0654	0.46	-0.0135	0.849	0.0195	0.773	-0.0339	7.16	-0.47	0.638	0.00965	0.873	0.0955	0.144
203430_at	23593	HEBP2	0.356	0.00702	-0.2	0.167	-0.0528	0.692	0.127	0.322	0.0395	0.797	-0.0702	0.632	0.175	0.2	0.24	0.0805	-0.0914	0.553	0.197	0.134	0.0503	7.14	0.367	0.714	1	0.0896	0.635	-0.0147	0.923	-0.174	0.227	-0.155	7.14	-1.01	0.313	-0.0555	0.667	0.203	0.145
225504_at	79618	HMBOX1	0.259	0.00467	0.00226	0.982	0.213	0.0216	0.29	0.00112	0.217	0.042	0.0888	0.383	0.482	5.02e-07	0.292	0.00231	0.138	0.196	0.124	0.175	-0.0188	8.34	-0.198	0.843	0.979	0.106	0.417	0.0661	0.53	0.0891	0.372	-0.156	8.34	-1.46	0.144	-0.036	0.687	0.141	0.146
230309_at	23743	BHMT2	-0.166	0.00883	0.0354	0.611	-0.0521	0.417	0.033	0.592	-0.0516	0.484	-0.201	0.00445	0.159	0.0163	0.0026	0.969	-0.14	0.06	0.0614	0.332	-0.00611	5.51	-0.0926	0.926	0.986	-0.0677	0.456	-0.0589	0.42	-0.0714	0.302	0.00701	5.51	0.0946	0.925	0.0605	0.329	0.0974	0.147
214270_s_at	22924	MAPRE3	-0.553	0.00851	0.412	0.0744	-0.19	0.37	-0.312	0.126	0.07	0.774	0.0895	0.702	-0.0457	0.834	-0.274	0.211	0.282	0.252	-0.357	0.089	0.133	5.95	0.61	0.542	1	0.109	0.718	0.426	0.0783	0.000481	0.998	0.286	5.95	1.17	0.243	-0.189	0.356	-0.317	0.154
225185_at	22808	MRAS	0.405	0.00284	0.298	0.0457	0.244	0.0753	0.296	0.0245	0.302	0.0549	0.169	0.261	0.342	0.0153	0.314	0.0263	0.311	0.0497	0.116	0.391	0.121	9.11	0.859	0.391	0.923	0.12	0.535	0.0515	0.741	0.234	0.114	-0.156	9.11	-0.989	0.323	0.0575	0.664	0.203	0.157
209243_s_at	5178	PEG3	-1.08	0.00656	0.24	0.58	-0.647	0.106	-0.601	0.117	-0.152	0.741	-0.461	0.294	-0.298	0.467	-0.337	0.413	0.753	0.103	0.00127	0.997	0.162	5.87	0.396	0.692	1	-0.303	0.593	1.12	0.0137	-0.411	0.34	0.515	5.87	1.12	0.264	-0.689	0.0743	-0.59	0.158
204559_s_at	51690	LSM7	0.408	0.00944	0.0423	0.806	0.21	0.186	-0.0546	0.72	0.128	0.482	0.162	0.354	0.337	0.039	0.131	0.423	0.154	0.401	0.0194	0.901	-0.221	5.89	-1.35	0.177	1	0.109	0.628	0.245	0.175	-0.0821	0.632	0.056	5.89	0.306	0.76	-0.0952	0.535	-0.233	0.16
226140_s_at	220213	OTUD1	0.209	0.00711	0.0651	0.444	0.0799	0.307	0.0434	0.564	0.117	0.195	0.0521	0.546	0.181	0.025	0.0591	0.464	0.149	0.101	0.189	0.0147	0.0918	7.93	1.14	0.254	0.923	0.0353	0.751	-0.0412	0.644	0.0513	0.544	-0.116	7.93	-1.28	0.201	0.00749	0.921	0.115	0.162
227247_at	84725	PLEKHA8	0.265	0.00918	0.0331	0.767	0.0999	0.331	0.00253	0.98	0.0502	0.671	-0.0924	0.414	0.297	0.00505	0.206	0.0527	0.138	0.248	-0.0457	0.652	0.1	5.82	0.946	0.344	0.923	0.128	0.381	-0.00757	0.948	-0.0744	0.503	-0.0425	5.82	-0.358	0.72	-0.0109	0.913	0.15	0.162
213055_at	961	CD47	-0.289	0.00771	-0.0146	0.902	-0.2	0.0673	-0.00088	0.993	-0.0584	0.643	-0.112	0.354	-0.103	0.359	-0.17	0.132	-0.0696	0.583	0.165	0.127	0.0116	6.94	0.103	0.918	1	-0.0143	0.927	0.192	0.124	-0.0196	0.868	0.0684	6.94	0.541	0.589	0.103	0.331	-0.16	0.162
31874_at	10634	GAS2L1	0.498	0.000504	0.00315	0.984	0.254	0.0788	0.136	0.325	0.284	0.0868	0.0685	0.666	0.0226	0.879	0.0799	0.591	0.187	0.262	0.0788	0.579	0.0799	8.11	0.539	0.59	1	0.257	0.209	-0.156	0.341	0.0378	0.808	-0.00556	8.11	-0.0334	0.973	0.0942	0.499	0.211	0.162
230507_at	6310	ATXN1	-0.196	0.00583	0.0283	0.717	0.0219	0.76	0.0105	0.879	-0.127	0.123	0.064	0.418	-0.155	0.036	0.133	0.0737	-0.0911	0.274	0.0703	0.322	0.177	4.33	2.4	0.0168	0.923	-0.00585	0.954	0.00255	0.975	0.0683	0.379	0.073	4.33	0.879	0.38	0.0107	0.878	0.105	0.162
225817_at	84952	CGNL1	0.378	0.00855	-0.0268	0.865	0.2	0.169	0.292	0.0365	0.183	0.272	0.0415	0.795	0.564	0.00017	0.234	0.118	0.171	0.309	0.379	0.00835	0.0699	7.55	0.468	0.64	0.951	0.00937	0.964	0.14	0.395	0.0163	0.917	-0.167	7.55	-0.994	0.32	0.274	0.051	0.211	0.164
212549_at	6777	STAT5B	0.204	0.00818	-0.0877	0.299	0.141	0.071	0.0182	0.807	0.0806	0.367	0.0884	0.301	0.115	0.149	0.0678	0.398	0.063	0.484	0.245	0.00146	-0.135	7.4	-1.69	0.0918	1	-0.00133	0.99	-0.0286	0.747	0.0459	0.584	-0.0172	7.4	-0.192	0.848	0.00997	0.894	0.113	0.165
203903_s_at	9843	HEPH	0.47	0.00635	-0.194	0.304	0.332	0.057	0.301	0.0722	-0.0667	0.739	-0.087	0.649	0.151	0.398	0.234	0.192	-0.166	0.411	0.135	0.432	-0.0914	6.88	-0.511	0.61	1	0.0695	0.778	0.279	0.16	0.0105	0.955	-0.182	6.88	-0.904	0.366	-0.113	0.502	0.252	0.166
211063_s_at	4690	NCK1	0.289	0.00428	-0.208	0.0619	0.113	0.271	0.0113	0.908	-0.0397	0.735	-0.223	0.0474	0.049	0.641	0.0841	0.425	0.0945	0.424	0.268	0.00801	-0.0335	6	-0.319	0.75	1	0.0974	0.501	0.0111	0.924	-0.0827	0.453	-0.137	6	-1.16	0.247	-0.0635	0.52	0.147	0.169
202696_at	9943	OXSR1	0.201	0.00528	-0.0788	0.319	0.0403	0.58	0.0181	0.795	0.0312	0.71	0.0058	0.942	0.112	0.133	0.109	0.147	0.0771	0.361	0.0606	0.399	0.0438	7.37	0.586	0.558	1	-0.0493	0.633	0.0892	0.282	-0.086	0.274	-0.0648	7.37	-0.77	0.441	-0.00804	0.909	0.104	0.171
202461_at	8892	EIF2B2	0.288	0.000637	0.106	0.253	0.06	0.481	0.014	0.863	0.185	0.0585	0.148	0.114	0.0996	0.254	0.0587	0.503	0.0455	0.643	0.105	0.211	0.0816	7.17	0.934	0.351	1	0.18	0.135	0.103	0.285	-0.0373	0.684	0.0393	7.17	0.401	0.689	0.0416	0.613	0.121	0.172
212077_at	800	CALD1	0.558	0.00815	-0.175	0.449	0.276	0.195	0.293	0.152	-0.0309	0.899	-0.0196	0.933	0.225	0.304	0.35	0.111	0.102	0.678	0.0628	0.765	0.0924	7.98	0.423	0.673	1	0.0925	0.759	0.309	0.202	0.0725	0.752	-0.504	7.98	-2.05	0.0407	-0.0901	0.661	0.304	0.172
226388_at	6920	TCEA3	0.309	0.0013	0.103	0.329	0.174	0.0732	0.104	0.266	0.185	0.0974	0.337	0.00165	0.124	0.212	0.0612	0.541	0.151	0.178	0.0543	0.57	0.086	5.15	0.862	0.389	0.923	0.174	0.207	0.0523	0.636	0.127	0.225	0.16	5.15	1.43	0.153	0.049	0.601	0.138	0.173
209102_s_at	26959	HBP1	0.323	0.0011	0.0219	0.84	0.188	0.0607	0.111	0.246	0.158	0.169	-0.0185	0.866	0.209	0.0418	0.177	0.0868	0.0443	0.702	0.188	0.0564	0.0598	7.87	0.582	0.56	1	0.0231	0.87	0.117	0.306	-0.0114	0.916	-0.0217	7.87	-0.188	0.851	0.0457	0.636	0.142	0.173
214177_s_at	57326	PBXIP1	0.369	0.00577	0.0464	0.752	0.257	0.0573	0.319	0.014	0.202	0.194	0.0982	0.508	0.233	0.0925	0.229	0.101	-0.15	0.337	0.342	0.0103	0.056	8.79	0.404	0.686	1	0.076	0.691	0.177	0.25	-0.083	0.569	0.0495	8.79	0.318	0.751	0.185	0.156	0.192	0.173
208957_at	23071	ERP44	-0.185	0.00567	0.0155	0.833	-0.0771	0.254	0.0145	0.824	-0.0365	0.639	-0.0196	0.792	-0.125	0.0726	-0.0664	0.341	-0.122	0.119	0.0778	0.243	0.0679	6.66	0.977	0.329	1	0.0115	0.905	0.0817	0.288	0.151	0.0383	0.0209	6.66	0.268	0.789	-0.0196	0.764	0.0957	0.176
205170_at	6773	STAT2	-0.357	0.000342	-0.184	0.0917	-0.171	0.0898	-0.0314	0.745	-0.0375	0.746	-0.211	0.0562	-0.0109	0.916	-0.0387	0.709	-0.0786	0.499	0.028	0.778	0.000836	5.84	0.00809	0.994	1	-0.181	0.203	0.147	0.2	-0.134	0.215	0.0824	5.84	0.71	0.478	0.159	0.101	0.142	0.177
221086_s_at	55079	FEZF2	0.359	0.000187	-0.0609	0.562	0.0322	0.739	-0.0153	0.869	0.193	0.0832	0.0158	0.882	-0.031	0.755	0.0188	0.851	0.0943	0.4	-0.00587	0.951	0.14	4.71	1.41	0.159	1	0.271	0.0485	-0.0751	0.496	0.0696	0.505	0.0512	4.71	0.458	0.647	-0.131	0.16	-0.136	0.178
203327_at	3416	IDE	0.282	0.00458	-0.155	0.156	0.169	0.0932	0.118	0.22	0.0909	0.431	-0.109	0.325	0.0209	0.839	0.0438	0.673	0.103	0.374	0.0776	0.433	-0.0473	6.06	-0.458	0.647	1	-0.000634	0.996	0.024	0.834	-0.0714	0.51	-0.00338	6.06	-0.0292	0.977	-0.0262	0.787	0.141	0.179
224812_at	11112	HIBADH	0.405	0.00121	0.152	0.267	0.253	0.0455	0.197	0.104	0.263	0.0699	-0.101	0.465	0.387	0.00289	0.122	0.348	0.158	0.278	0.0508	0.683	-0.0117	7.06	-0.0901	0.928	0.986	0.142	0.426	-0.0555	0.699	-0.0664	0.626	-0.16	7.06	-1.1	0.272	-0.196	0.109	0.177	0.179
205868_s_at	5781	PTPN11	-0.352	0.0052	-0.0462	0.738	-0.0718	0.572	0.0609	0.618	-0.0182	0.901	0.229	0.102	0.086	0.51	-0.0683	0.602	-0.0308	0.834	-0.155	0.215	0.0236	4.97	0.181	0.857	1	0.161	0.372	0.244	0.092	-0.029	0.833	-0.0472	4.97	-0.322	0.748	7.09e-05	1	-0.178	0.18
236265_at	6671	SP4	0.264	0.00949	0.0227	0.839	0.164	0.112	0.00379	0.969	0.104	0.379	-0.0486	0.667	0.227	0.0319	0.151	0.154	0.14	0.241	-0.0991	0.329	-0.0666	7.33	-0.63	0.529	0.934	0.134	0.359	-0.0959	0.413	-0.165	0.138	-0.224	7.33	-1.89	0.0595	-0.152	0.127	0.143	0.183
225604_s_at	152007	GLIPR2	-0.513	0.000255	-0.481	0.00177	-0.0474	0.737	-0.0852	0.53	-0.277	0.0886	-0.123	0.428	0.0387	0.79	-0.0159	0.913	-0.00919	0.955	-0.00237	0.986	-0.272	6.29	-1.87	0.0616	0.923	-0.22	0.272	0.0615	0.702	-0.252	0.0981	-0.365	6.29	-2.24	0.0254	-0.306	0.0252	-0.196	0.184
213890_x_at	6217	RPS16	0.261	0.00558	0.0104	0.919	0.129	0.176	0.0803	0.379	0.0173	0.874	0.126	0.226	0.169	0.0835	0.059	0.547	0.00632	0.954	0.2	0.0326	-0.0399	10.8	-0.408	0.683	1	-0.105	0.436	0.142	0.19	0.0116	0.91	-0.221	10.8	-2.02	0.0439	0.0645	0.482	0.131	0.186
202609_at	2059	EPS8	0.454	0.00848	-0.386	0.0415	0.0772	0.657	0.163	0.331	-0.0161	0.936	-0.166	0.387	0.159	0.375	0.231	0.199	-0.0828	0.681	0.151	0.379	-0.0191	6.62	-0.106	0.915	1	0.0636	0.797	0.353	0.0749	-0.0721	0.701	-0.32	6.62	-1.59	0.111	-0.162	0.336	0.24	0.188
222458_s_at	79647	AKIRIN1	-0.528	0.00154	-0.155	0.397	-0.227	0.177	-0.176	0.276	-0.161	0.406	-0.0627	0.735	0.159	0.356	-0.161	0.354	0.0749	0.7	-0.139	0.402	0.0365	5.85	0.211	0.833	0.977	0.122	0.61	0.302	0.115	-0.336	0.0642	-0.0263	5.85	-0.135	0.892	-0.245	0.132	-0.231	0.189
218718_at	56034	PDGFC	0.476	0.000516	-0.0335	0.823	0.19	0.17	0.182	0.171	0.27	0.0891	0.0329	0.829	0.0494	0.728	0.312	0.0289	0.0682	0.67	0.166	0.223	0.0882	6.43	0.622	0.534	1	0.227	0.246	0.279	0.0766	0.161	0.28	-0.0659	6.43	-0.413	0.679	-0.0893	0.503	0.188	0.194
209539_at	9459	ARHGEF6	0.32	0.00631	-0.0359	0.78	0.275	0.0204	0.218	0.0549	0.135	0.322	0.0648	0.619	0.241	0.0472	0.291	0.0171	0.0953	0.486	0.318	0.00656	0.00134	7.72	0.011	0.991	1	0.113	0.499	0.203	0.132	-0.0418	0.743	-0.17	7.72	-1.25	0.213	0.131	0.252	0.16	0.196
234068_s_at	160	AP2A1	-0.408	0.00581	0.204	0.21	-0.0126	0.933	-0.209	0.145	0.0459	0.789	-0.104	0.526	-0.0696	0.65	-0.144	0.349	0.231	0.181	-0.19	0.198	0.0402	6.43	0.262	0.793	0.974	0.0315	0.882	0.181	0.286	-0.151	0.35	-0.0243	6.43	-0.141	0.888	-0.268	0.0635	-0.201	0.197
203245_s_at	266655	LINC00094	0.42	0.00756	-0.262	0.129	0.0896	0.572	-0.104	0.496	0.111	0.542	-0.178	0.308	0.0604	0.711	0.091	0.578	0.233	0.205	-0.0814	0.603	-0.0512	6.22	-0.314	0.753	1	-0.0438	0.845	-0.00703	0.969	-0.192	0.262	-0.146	6.22	-0.799	0.424	-0.266	0.0832	-0.214	0.198
227131_at	4215	MAP3K3	0.324	0.00537	0.0585	0.646	0.419	0.000386	0.126	0.263	0.0025	0.985	0.175	0.175	0.379	0.00171	0.141	0.244	0.213	0.117	0.237	0.0414	-0.0114	6.75	-0.0944	0.925	0.986	-0.102	0.538	-0.201	0.132	0.0839	0.508	-0.0445	6.75	-0.328	0.743	0.0799	0.481	0.157	0.2
224694_at	84168	ANTXR1	0.527	0.00963	0.0347	0.877	0.157	0.446	0.387	0.0505	0.414	0.08	-0.0107	0.962	0.777	0.000253	0.325	0.126	0.0421	0.86	0.371	0.0679	0.0378	7.91	0.179	0.858	0.98	0.501	0.0858	0.293	0.211	0.0359	0.872	-0.326	7.91	-1.37	0.17	0.149	0.454	0.275	0.201
212483_at	25836	NIPBL	0.293	0.00483	-0.2	0.0792	0.194	0.0654	0.0805	0.424	0.115	0.341	-0.0585	0.613	0.151	0.161	0.132	0.224	0.16	0.189	0.0774	0.455	-0.0464	6.13	-0.43	0.667	1	0.0141	0.924	0.0847	0.479	-0.102	0.366	-0.0446	6.13	-0.368	0.713	-0.178	0.0797	0.139	0.204
209921_at	23657	SLC7A11	0.595	0.00404	-0.00866	0.97	0.583	0.00534	0.509	0.0113	0.461	0.0551	0.193	0.402	0.474	0.0272	0.432	0.0451	0.106	0.661	0.59	0.0043	0.125	7.49	0.583	0.56	1	0.355	0.231	0.703	0.00318	-0.00272	0.99	-0.146	7.49	-0.605	0.546	0.109	0.588	0.276	0.206
225042_s_at	81566	CSRNP2	-0.266	0.000332	-0.0639	0.43	-0.11	0.139	-0.129	0.0714	-0.0467	0.586	-0.0549	0.503	-0.0296	0.699	-0.12	0.118	-0.0958	0.268	-0.0287	0.696	0.00458	7.02	0.0597	0.952	0.991	-0.0191	0.856	0.0997	0.24	-0.083	0.303	0.0602	7.02	0.699	0.485	-0.098	0.174	-0.0985	0.207
218980_at	80206	FHOD3	0.409	0.00785	0.0147	0.931	0.0204	0.896	-0.0487	0.744	0.269	0.132	-0.0138	0.936	0.0752	0.637	0.079	0.622	0.285	0.113	0.101	0.511	0.0237	6.79	0.149	0.882	1	-0.0199	0.928	-0.097	0.583	0.00323	0.985	-0.0124	6.79	-0.0692	0.945	-0.0914	0.542	-0.204	0.209
226137_at	463	ZFHX3	0.356	0.00192	0.145	0.248	0.0368	0.75	0.312	0.00517	0.108	0.418	-0.0674	0.597	0.282	0.0178	0.154	0.197	0.0944	0.481	0.127	0.264	-0.0269	6.21	-0.226	0.821	0.977	0.179	0.275	-0.0176	0.894	0.00437	0.972	-0.0455	6.21	-0.34	0.734	0.0623	0.578	0.152	0.209
208503_s_at	57798	GATAD1	-0.525	0.00441	-0.215	0.287	-0.256	0.169	-0.171	0.338	-0.126	0.554	-0.166	0.417	0.0907	0.635	-0.0502	0.793	0.245	0.255	-0.193	0.293	0.119	7	0.624	0.533	1	-0.232	0.379	0.595	0.00503	-0.103	0.609	0.0909	7	0.423	0.672	-0.261	0.146	-0.243	0.211
218207_s_at	50861	STMN3	-0.207	0.00378	0.0271	0.729	-0.00673	0.926	-0.0557	0.42	0.0494	0.551	0.0151	0.849	-0.024	0.746	-0.0491	0.508	0.0954	0.253	0.0557	0.433	-0.0241	4.61	-0.325	0.745	1	0.135	0.185	0.156	0.0581	0.0553	0.477	0.0758	4.61	0.911	0.363	0.00494	0.943	-0.0938	0.213
201906_s_at	10217	CTDSPL	0.286	0.00728	-0.0353	0.762	0.149	0.167	0.152	0.14	0.259	0.0367	0.048	0.685	0.0377	0.733	0.165	0.137	0.0238	0.848	0.0941	0.375	-0.162	7.1	-1.47	0.143	1	0.0181	0.905	0.0266	0.828	0.0318	0.784	0.0257	7.1	0.207	0.836	0.0519	0.618	0.14	0.214
225051_at	2035	EPB41	0.344	0.000903	0.165	0.146	0.123	0.238	0.183	0.0679	0.136	0.257	0.01	0.931	0.174	0.105	0.0467	0.665	0.166	0.169	0.166	0.108	-0.0779	6.7	-0.725	0.469	0.923	0.167	0.259	-0.147	0.217	0.185	0.102	-0.115	6.7	-0.951	0.342	-0.0133	0.895	0.136	0.215
201668_x_at	4082	MARCKS	-0.607	0.00412	0.0916	0.693	-0.129	0.548	0.0225	0.913	-0.115	0.64	-0.0775	0.742	-0.00907	0.967	-0.148	0.503	0.146	0.556	0.0785	0.71	0.15	6.49	0.685	0.494	1	0.0668	0.825	0.552	0.0234	-0.268	0.246	0.244	6.49	0.989	0.323	0.0107	0.959	-0.274	0.219
213526_s_at	55957	LIN37	0.317	0.00538	-0.0848	0.497	0.207	0.0725	0.0523	0.636	0.151	0.254	-0.066	0.602	-0.0383	0.746	0.0529	0.655	0.133	0.316	-0.108	0.34	-0.0626	4.63	-0.53	0.596	1	0.126	0.439	-0.134	0.307	-0.139	0.264	-0.0927	4.63	-0.698	0.485	-0.259	0.02	-0.147	0.223
213005_s_at	23189	KANK1	0.422	0.00652	-0.18	0.289	0.32	0.0409	0.338	0.0246	0.169	0.349	-0.0658	0.703	0.358	0.0261	0.257	0.112	0.0679	0.708	0.191	0.216	0.0984	8.12	0.611	0.541	1	0.159	0.475	0.276	0.121	0.0857	0.612	-0.114	8.12	-0.63	0.529	-0.148	0.328	0.199	0.224
212570_at	23052	ENDOD1	-0.309	0.0047	-0.145	0.227	-0.0279	0.801	0.0635	0.55	-0.136	0.285	0.0753	0.536	0.017	0.881	0.0559	0.624	-0.236	0.0658	0.0906	0.406	-0.0132	6.61	-0.116	0.908	1	-0.0986	0.529	0.252	0.0451	-0.00383	0.974	0.0422	6.61	0.331	0.741	-0.116	0.278	-0.14	0.225
233498_at	2066	ERBB4	0.323	0.00173	-0.095	0.4	0.179	0.086	0.185	0.0647	0.159	0.183	-0.038	0.74	0.186	0.0826	0.156	0.145	0.122	0.31	0.106	0.3	0.0952	7.29	0.891	0.373	0.923	0.115	0.434	0.173	0.143	-0.0414	0.712	-0.0326	7.29	-0.271	0.786	0.242	0.0163	0.131	0.226
201262_s_at	633	BGN	-0.348	0.00662	0.0304	0.829	-0.0474	0.714	0.0245	0.843	0.0381	0.798	0.277	0.052	0.0257	0.847	0.0358	0.788	-0.133	0.376	0.0117	0.927	0.133	5.66	1	0.316	1	-0.0586	0.749	0.114	0.437	0.00467	0.973	-0.0764	5.66	-0.511	0.609	0.211	0.0916	0.163	0.228
229747_x_at	146880	LOC146880	-0.361	0.00825	-0.0419	0.78	0.201	0.146	0.0675	0.61	-0.00882	0.956	0.166	0.276	-0.0582	0.681	0.209	0.142	0.0575	0.719	0.375	0.00606	-0.0769	5.03	-0.542	0.588	0.94	-0.108	0.58	0.275	0.0803	-0.0472	0.751	0.129	5.03	0.807	0.42	0.287	0.0315	-0.173	0.23
201503_at	10146	G3BP1	0.403	0.0064	-0.296	0.0677	0.361	0.0157	0.286	0.0465	0.142	0.407	-0.167	0.309	0.199	0.195	0.266	0.0838	0.28	0.105	0.243	0.0987	0.0723	6.02	0.472	0.637	1	0.163	0.441	0.185	0.276	-0.116	0.472	-0.147	6.02	-0.854	0.393	-0.0351	0.808	0.186	0.233
204831_at	1024	CDK8	0.224	0.000787	-0.0326	0.656	0.0441	0.513	0.0615	0.341	0.0202	0.794	-0.1	0.177	0.0838	0.226	0.125	0.0733	0.12	0.123	0.0971	0.144	0.00691	4.22	0.0998	0.921	1	0.0721	0.45	-0.0742	0.333	0.046	0.527	0.0265	4.22	0.34	0.734	-0.0261	0.688	0.084	0.233
225428_s_at	79039	DDX54	-0.35	0.00741	-0.0313	0.827	0.125	0.343	0.0729	0.565	0.0211	0.889	0.00304	0.983	-0.0352	0.795	0.0974	0.474	-0.0184	0.904	0.239	0.0665	-0.0797	7	-0.587	0.557	0.934	-0.108	0.564	0.13	0.388	-0.0411	0.773	0.156	7	1.02	0.306	0.232	0.0691	-0.165	0.233
201594_s_at	9989	PPP4R1	0.305	0.00678	-0.141	0.255	0.289	0.0114	0.0911	0.405	0.182	0.164	0.0135	0.914	0.226	0.0534	0.16	0.172	0.174	0.187	0.229	0.0415	-0.0246	6.75	-0.21	0.834	1	0.0135	0.933	0.12	0.354	-0.183	0.137	-0.136	6.75	-1.03	0.301	-0.118	0.282	0.141	0.235
219833_s_at	114327	EFHC1	0.286	0.00406	-0.11	0.316	0.188	0.062	0.0723	0.454	0.266	0.0219	0.123	0.267	0.195	0.0596	0.12	0.246	0.033	0.777	0.253	0.0111	0.0289	5.34	0.28	0.78	1	0.0415	0.771	-0.0811	0.479	-0.0605	0.578	0.00714	5.34	0.0614	0.951	-0.0479	0.622	0.124	0.237
210473_s_at	166647	GPR125	0.742	7.27e-06	0.166	0.359	0.287	0.0847	0.378	0.018	0.669	0.000488	0.337	0.0657	0.225	0.188	0.404	0.0187	0.152	0.429	0.267	0.103	0.337	6.63	1.97	0.0491	1	0.464	0.049	0.751	7.92e-05	0.225	0.21	-0.0177	6.63	-0.092	0.927	0.17	0.29	0.206	0.237
219378_at	79612	NAA16	0.383	0.00184	0.138	0.307	0.26	0.036	-0.0316	0.791	0.138	0.333	-0.242	0.0765	0.0984	0.44	0.106	0.406	0.206	0.152	0.0983	0.421	-0.0265	5.9	-0.208	0.835	1	0.273	0.12	0.073	0.605	0.0362	0.787	-0.0909	5.9	-0.635	0.525	-0.251	0.0366	0.153	0.238
200834_s_at	6227	RPS21	0.355	0.0058	0.0389	0.783	0.285	0.0286	0.157	0.209	0.0108	0.943	0.211	0.141	0.201	0.133	0.11	0.412	0.377	0.0124	0.233	0.069	0.103	10.4	0.773	0.44	1	-0.194	0.293	0.057	0.7	0.0237	0.866	-0.0187	10.4	-0.124	0.901	0.244	0.0525	0.16	0.238
228448_at	4135	MAP6	0.28	0.0081	0.036	0.756	0.116	0.279	0.0938	0.36	0.0351	0.775	-0.173	0.142	0.188	0.0857	0.141	0.2	0.207	0.0936	0.159	0.131	0.00173	7.44	0.0158	0.987	0.998	0.0397	0.793	-0.0134	0.912	-0.0874	0.448	-0.0076	7.44	-0.0617	0.951	-0.0733	0.477	0.131	0.241
213986_s_at	91304	TMEM259	-0.512	0.000967	0.0241	0.887	-0.123	0.431	-0.178	0.235	0.102	0.57	0.179	0.298	0.137	0.393	-0.0869	0.59	-0.027	0.882	-0.175	0.256	0.0529	4.79	0.329	0.742	1	0.229	0.301	0.252	0.157	0.125	0.458	-0.0301	4.79	-0.167	0.868	0.022	0.884	-0.19	0.245
203278_s_at	51317	PHF21A	0.26	0.00113	-0.129	0.14	0.134	0.0953	0.167	0.0308	0.119	0.2	0.112	0.207	0.143	0.0841	0.116	0.162	-0.0235	0.801	0.282	0.00041	-0.12	7.34	-1.45	0.148	1	-0.0665	0.56	0.0187	0.838	0.00356	0.967	-0.0053	7.34	-0.0571	0.954	0.0297	0.702	0.0973	0.247
204888_s_at	9148	NEURL	-0.194	0.00673	0.141	0.0719	-0.105	0.148	0.0238	0.732	-0.0122	0.884	0.119	0.134	-0.0667	0.369	0.0516	0.489	-0.0242	0.772	0.0221	0.757	0.00529	5.08	0.0712	0.943	1	-0.0233	0.82	0.205	0.0128	-0.0144	0.853	0.101	5.08	1.21	0.228	0.0893	0.201	-0.0869	0.25
209659_s_at	8881	CDC16	0.334	0.00329	-0.0503	0.686	0.177	0.123	0.0413	0.708	0.0284	0.829	0.0857	0.497	0.14	0.236	0.0298	0.801	-0.0736	0.579	-0.0768	0.497	0.0732	7.77	0.621	0.535	1	-0.00611	0.97	0.0854	0.513	-0.0393	0.751	-0.0232	7.77	-0.175	0.861	-0.0891	0.421	-0.137	0.253
205150_s_at	9865	TRIL	0.493	0.00978	0.116	0.58	0.385	0.0459	0.432	0.02	0.375	0.0907	0.304	0.153	0.446	0.0248	0.338	0.0894	0.203	0.364	0.353	0.0635	0.177	7.44	0.891	0.374	1	0.501	0.0672	0.745	0.000724	0.301	0.149	-0.043	7.44	-0.193	0.847	0.0475	0.799	0.23	0.253
214683_s_at	1195	CLK1	0.608	0.00249	-0.0894	0.685	0.426	0.0358	0.0922	0.636	0.2	0.391	0.073	0.744	0.333	0.111	0.372	0.0758	0.184	0.434	0.216	0.28	0.0318	6.64	0.153	0.879	1	0.118	0.683	0.187	0.417	0.128	0.56	-0.367	6.64	-1.57	0.117	-0.292	0.136	0.241	0.256
217585_at	10529	NEBL	0.191	0.00796	-0.026	0.742	0.0781	0.283	0.0698	0.318	0.0911	0.276	0.109	0.172	0.0873	0.243	0.128	0.0869	0.0967	0.251	0.139	0.0529	-0.0423	5.21	-0.566	0.572	1	0.0533	0.605	0.0428	0.605	0.0812	0.301	0.0112	5.21	0.134	0.894	0.0514	0.464	0.0858	0.259
207843_x_at	1528	CYB5A	0.233	0.00987	-0.249	0.0122	0.125	0.171	0.107	0.22	-0.0563	0.591	0.0128	0.899	0.0621	0.507	0.111	0.236	0.0623	0.555	0.071	0.43	-0.0388	7.07	-0.414	0.679	1	0.0327	0.8	0.0753	0.468	-0.228	0.0207	-0.172	7.07	-1.63	0.104	-0.0149	0.865	0.106	0.265
209022_at	10735	STAG2	0.426	0.00486	-0.28	0.0916	0.384	0.012	0.19	0.194	0.101	0.564	-0.172	0.304	0.242	0.123	0.136	0.387	0.186	0.293	0.234	0.12	-0.178	8.06	-1.14	0.256	1	-0.074	0.732	0.121	0.485	-0.103	0.534	-0.281	8.06	-1.59	0.111	-0.253	0.0869	0.176	0.269
218183_at	29965	CDIP1	0.361	0.00279	0.079	0.55	0.346	0.00457	0.171	0.142	0.073	0.602	0.21	0.118	0.215	0.0853	0.192	0.126	0.0981	0.486	0.191	0.112	0.0331	6.19	0.264	0.792	1	0.0586	0.734	-0.00677	0.961	0.0109	0.934	-0.00978	6.19	-0.0697	0.944	0.193	0.101	0.14	0.271
222807_at	56946	C11orf30	0.166	0.00879	-0.0439	0.528	0.106	0.0978	0.0166	0.786	0.131	0.0745	0.0648	0.357	0.149	0.0233	0.178	0.00703	0.125	0.0906	0.0247	0.696	0.0784	7.09	1.19	0.233	0.923	0.131	0.147	-0.0037	0.959	0.0799	0.247	-0.0998	7.09	-1.35	0.177	-0.0945	0.126	0.0728	0.276
226572_at	30837	SOCS7	0.388	0.00437	0.0966	0.518	0.0297	0.829	-0.0564	0.669	0.239	0.131	0.0101	0.946	0.145	0.306	0.0587	0.679	0.247	0.121	-0.243	0.0735	-0.0495	7.48	-0.351	0.726	0.961	0.0395	0.839	0.0507	0.746	-0.111	0.454	-0.0799	7.48	-0.503	0.615	-0.244	0.0659	-0.156	0.276
223437_at	5465	PPARA	0.347	0.00346	-0.0157	0.904	0.255	0.0334	0.208	0.0704	0.216	0.116	0.0869	0.51	0.304	0.0138	0.0251	0.839	0.152	0.274	0.0612	0.604	-0.048	6.79	-0.39	0.697	0.956	-0.0207	0.903	0.196	0.151	0.0115	0.929	-0.109	6.79	-0.788	0.431	0.0291	0.802	0.136	0.277
218326_s_at	55366	LGR4	0.198	0.00389	-0.103	0.171	0.051	0.461	0.0354	0.594	0.0843	0.289	-0.084	0.27	0.0905	0.203	0.113	0.115	0.0292	0.715	0.0251	0.713	0.0358	4.63	0.504	0.615	1	0.149	0.129	0.151	0.0552	0.0315	0.673	-0.134	4.63	-1.68	0.094	-0.0557	0.405	0.0784	0.278
226863_at	642273	FAM110C	0.261	0.0043	-0.0549	0.584	0.0524	0.57	0.0274	0.757	0.0493	0.643	0.0733	0.471	0.0206	0.828	0.0955	0.316	-0.103	0.335	-0.065	0.476	0.111	4.74	1.17	0.244	0.923	0.0577	0.659	0.0139	0.895	0.0368	0.712	-0.0707	4.74	-0.662	0.508	-0.0421	0.637	-0.105	0.279
218243_at	80230	RUFY1	0.235	0.00279	0.0754	0.382	0.127	0.111	0.169	0.0263	0.0823	0.367	-0.00183	0.983	0.0702	0.389	0.0982	0.23	0.0407	0.657	-0.0142	0.856	0.0679	7.67	0.833	0.405	1	0.101	0.368	0.0583	0.518	0.0171	0.842	-0.106	7.67	-1.16	0.245	0.0188	0.806	0.0897	0.279
202626_s_at	4067	LYN	-0.366	0.00894	-0.234	0.128	-0.396	0.00527	-0.0769	0.571	-0.448	0.00598	-0.169	0.277	-0.1	0.491	-0.177	0.224	-0.124	0.447	-0.0874	0.531	0.00662	5.83	0.0456	0.964	1	-0.2	0.318	0.158	0.327	-0.506	0.000963	-0.15	5.83	-0.917	0.359	-0.0703	0.607	-0.16	0.28
221824_s_at	220972	2008-03-01	0.37	0.00449	-0.186	0.193	0.298	0.0237	0.187	0.139	0.11	0.466	-0.1	0.489	0.261	0.054	0.142	0.295	0.112	0.462	0.299	0.0213	0.0777	6.1	0.575	0.566	1	-0.0647	0.729	0.364	0.0152	0.074	0.602	0.0433	6.1	0.285	0.776	-0.151	0.236	0.149	0.28
203614_at	9724	UTP14C	0.339	0.0071	-0.0763	0.581	0.176	0.168	0.078	0.523	0.0744	0.611	-0.0632	0.652	0.103	0.431	0.229	0.0815	0.203	0.168	0.132	0.295	0.0338	6.86	0.258	0.796	1	0.209	0.246	0.118	0.414	0.0214	0.876	-0.0626	6.86	-0.426	0.67	-0.196	0.112	0.144	0.28
227983_at	196383	RILPL2	0.212	0.00802	0.0832	0.343	0.049	0.544	0.0817	0.292	0.0338	0.715	-0.0381	0.668	0.0841	0.31	0.13	0.118	0.0719	0.441	0.0384	0.63	0.0153	6.46	0.184	0.854	0.98	0.127	0.268	-0.0527	0.566	-0.0977	0.262	-0.0136	6.46	-0.146	0.884	0.113	0.146	0.0904	0.284
226309_at	83544	DNAL1	0.228	0.00928	-0.0292	0.761	-0.0346	0.696	-0.0129	0.879	0.162	0.112	-0.0598	0.539	0.212	0.0203	-0.0662	0.468	0.124	0.225	-0.0902	0.302	0.0224	7.64	0.246	0.806	0.976	-0.00488	0.969	-0.0774	0.442	-0.15	0.117	-0.0455	7.64	-0.445	0.656	-0.0866	0.312	-0.0987	0.286
212894_at	6832	SUPV3L1	0.254	0.00788	-0.034	0.746	-0.00407	0.966	-0.06	0.517	-0.031	0.78	0.113	0.285	-0.0822	0.407	0.049	0.622	0.0757	0.498	-0.264	0.00569	-0.103	6.7	-1.04	0.299	1	-0.0569	0.677	-0.0709	0.518	-0.0848	0.415	-0.0452	6.7	-0.405	0.685	-0.0354	0.704	-0.107	0.289
205092_x_at	22890	ZBTB1	0.108	0.0052	0.0245	0.563	-0.0584	0.135	0.0337	0.369	0.0122	0.785	-0.0382	0.374	-0.0397	0.323	0.0747	0.0638	-0.0665	0.141	-0.0368	0.34	-0.0185	3.91	-0.461	0.645	1	0.0169	0.76	-0.0508	0.253	0.0263	0.532	-0.0873	3.91	-1.94	0.0532	0.000672	0.986	0.0431	0.291
227005_at	11102	RPP14	-0.283	0.00872	0.0735	0.535	-0.134	0.22	-0.000185	0.999	-0.0308	0.806	-0.157	0.192	-0.0168	0.881	-0.00888	0.937	-0.00937	0.941	-0.163	0.13	0.0683	7.46	0.61	0.542	0.934	0.031	0.841	0.0667	0.591	-0.177	0.132	-0.00129	7.46	-0.0102	0.992	-0.306	0.00381	-0.119	0.295
200763_s_at	6176	RPLP1	0.273	0.00417	-0.024	0.818	0.162	0.0929	0.146	0.114	-0.011	0.921	0.182	0.0869	0.179	0.0707	0.0442	0.656	0.0451	0.686	0.171	0.0715	-0.136	11.2	-1.37	0.171	1	-0.126	0.356	0.145	0.187	0.0611	0.557	-0.151	11.2	-1.36	0.175	0.142	0.127	0.103	0.306
226260_x_at	140467	ZNF358	-0.375	0.00299	0.202	0.146	0.0917	0.471	-0.0535	0.662	0.156	0.288	0.166	0.238	0.149	0.255	0.0213	0.871	0.178	0.229	0.00557	0.965	-0.0596	7.38	-0.455	0.649	0.952	0.0344	0.849	0.0714	0.622	-0.03	0.827	0.169	7.38	1.15	0.252	0.338	0.00624	-0.136	0.308
224156_x_at	55540	IL17RB	0.345	0.00505	0.0631	0.64	0.182	0.145	0.304	0.011	0.183	0.202	0.223	0.104	0.223	0.0805	0.203	0.114	0.11	0.443	-0.0329	0.789	0.0504	7.85	0.394	0.694	0.956	0.159	0.368	0.151	0.285	0.194	0.149	-0.151	7.85	-1.05	0.295	0.00367	0.976	0.132	0.31
224674_at	80727	TTYH3	-0.25	0.00539	0.0316	0.748	-0.121	0.183	-0.0744	0.392	-0.0388	0.709	-0.0276	0.782	0.0282	0.762	-0.0563	0.547	0.0791	0.451	-0.094	0.293	0.0144	7.82	0.155	0.877	0.982	-0.123	0.338	0.00863	0.933	-0.143	0.145	-0.0325	7.82	-0.31	0.757	-0.0385	0.66	-0.0961	0.31
205173_x_at	965	CD58	0.252	0.00615	-0.143	0.157	-0.012	0.897	0.0788	0.377	0.118	0.268	-0.0567	0.579	0.15	0.116	0.115	0.23	-0.192	0.0752	0.0541	0.555	-0.0806	4.93	-0.844	0.399	1	0.104	0.428	0.122	0.249	-0.085	0.397	-0.137	4.93	-1.28	0.203	-0.175	0.0522	0.0984	0.311
203221_at	7088	TLE1	0.294	0.00435	-0.0897	0.428	0.0812	0.436	0.101	0.31	0.134	0.264	0.0797	0.486	0.0315	0.769	0.106	0.326	0.0131	0.914	0.12	0.241	0.109	7.85	1.02	0.308	1	0.158	0.285	0.0197	0.868	-0.0148	0.895	-0.143	7.85	-1.19	0.236	0.0979	0.331	0.11	0.313
201398_s_at	23471	TRAM1	0.337	0.00681	-0.24	0.0796	0.363	0.00398	0.175	0.147	0.0913	0.528	-0.111	0.423	0.281	0.0302	0.171	0.189	0.183	0.208	0.149	0.23	-0.0173	7.85	-0.134	0.893	1	0.0535	0.764	-0.0177	0.902	-0.269	0.0475	-0.23	7.85	-1.59	0.113	-0.176	0.148	0.132	0.314
208762_at	7341	SUMO1	0.145	0.00486	-0.102	0.0704	-0.0977	0.0606	-0.112	0.0248	-0.0628	0.294	-0.207	0.000321	-0.0136	0.8	0.0235	0.661	0.0235	0.696	-0.0339	0.509	-0.0349	4.07	-0.653	0.514	1	0.0218	0.768	-0.0796	0.179	0.00718	0.898	-0.141	4.07	-2.34	0.0194	-0.113	0.0246	-0.0547	0.314
218698_at	51074	APIP	0.358	0.00304	-0.0523	0.693	0.117	0.336	0.215	0.067	0.255	0.0695	0.00922	0.945	0.292	0.0199	0.216	0.0854	0.103	0.466	0.232	0.0539	0.171	5.58	1.37	0.172	1	0.1	0.562	0.167	0.229	-6.98e-05	1	-0.177	5.58	-1.26	0.209	-0.0824	0.484	0.127	0.318
224335_s_at	23621	BACE1	-0.354	0.00447	-0.0277	0.839	-0.109	0.385	-0.188	0.12	-0.144	0.318	-0.0249	0.857	-0.0412	0.75	-0.237	0.0671	0.0114	0.938	0.0293	0.813	0.00486	6.55	0.0377	0.97	0.995	-0.0131	0.941	0.34	0.0175	-0.0626	0.644	0.0442	6.55	0.305	0.761	-0.286	0.0188	-0.131	0.318
223366_at	619279	ZNF704	0.288	0.00757	0.174	0.142	0.193	0.0768	0.16	0.125	0.153	0.221	0.0181	0.88	0.374	0.000844	0.222	0.0484	0.117	0.354	0.23	0.0324	-0.000741	8.06	-0.00663	0.995	0.999	0.079	0.608	0.0247	0.842	-0.0116	0.922	-0.106	8.06	-0.843	0.4	-0.0859	0.414	0.113	0.319
229744_at	6744	SSFA2	0.273	0.00723	-0.136	0.22	0.058	0.571	0.254	0.0099	0.0154	0.896	-0.0942	0.403	0.0601	0.568	0.0339	0.748	-0.0715	0.547	-0.0343	0.735	-0.0849	6.79	-0.806	0.42	0.923	-0.0308	0.832	0.0436	0.708	-0.179	0.105	-0.18	6.79	-1.53	0.128	-0.0754	0.446	-0.106	0.322
201977_s_at	9812	KIAA0141	-0.24	0.00366	-0.124	0.17	-0.153	0.0671	0.0151	0.85	-0.211	0.0279	-0.197	0.0319	0.0396	0.644	0.125	0.148	0.00624	0.948	-0.00294	0.971	-0.0851	6.12	-0.992	0.321	1	-0.102	0.387	0.133	0.161	-0.0584	0.516	0.0917	6.12	0.952	0.342	0.0646	0.423	0.0861	0.323
49452_at	32	ACACB	0.45	0.00596	0.0251	0.889	0.341	0.0391	0.264	0.0962	0.21	0.269	0.142	0.436	0.328	0.0533	0.218	0.201	0.0407	0.831	0.206	0.206	-0.0129	6.72	-0.076	0.939	1	0.0686	0.769	-0.0831	0.658	0.165	0.354	-0.0146	6.72	-0.0767	0.939	0.146	0.361	0.17	0.324
201987_at	9969	MED13	0.373	0.00465	-0.172	0.233	0.254	0.0567	0.143	0.262	0.232	0.13	-0.0183	0.901	0.214	0.117	0.143	0.298	0.184	0.231	0.0615	0.639	-0.102	7.67	-0.743	0.458	1	0.0383	0.839	0.107	0.479	-0.0213	0.882	-0.239	7.67	-1.55	0.12	-0.206	0.109	0.136	0.326
225782_at	253827	MSRB3	0.464	0.00197	0.0993	0.545	0.0898	0.552	0.137	0.345	0.234	0.179	0.00512	0.975	0.282	0.0696	0.333	0.033	0.0361	0.836	0.0297	0.842	0.111	5.83	0.716	0.474	0.923	0.0534	0.803	0.165	0.339	0.0101	0.951	-0.251	5.83	-1.44	0.151	-0.0144	0.921	0.154	0.328
218715_at	55813	UTP6	0.326	0.00379	-0.0261	0.832	-0.0655	0.563	-0.144	0.187	0.0641	0.623	0.0903	0.47	0.109	0.351	0.0694	0.553	0.247	0.0602	-0.0348	0.756	0.0733	7.03	0.628	0.53	1	0.0174	0.914	0.114	0.378	0.00343	0.978	0.0339	7.03	0.258	0.796	-0.304	0.00572	-0.115	0.333
203978_at	4682	NUBP1	0.198	0.00623	-0.0527	0.508	0.0474	0.517	0.117	0.0961	0.107	0.202	0.0517	0.521	0.0807	0.284	0.0249	0.741	-0.0967	0.254	-0.0137	0.849	0.073	5.52	0.969	0.333	1	0.0637	0.539	0.129	0.123	-0.0114	0.886	0.0307	5.52	0.363	0.717	0.0279	0.693	0.0737	0.336
202127_at	8899	PRPF4B	0.468	0.00445	-0.149	0.407	0.173	0.297	0.0987	0.536	0.139	0.465	-0.0431	0.813	0.109	0.523	0.225	0.189	-0.0873	0.65	0.135	0.409	-0.0477	6.29	-0.28	0.78	1	0.0942	0.689	-0.0168	0.929	-0.12	0.504	-0.0878	6.29	-0.458	0.647	-0.0833	0.603	0.166	0.338
239320_at	94030	LRRC4B	-0.546	0.00925	0.0555	0.809	0.0549	0.796	-0.199	0.327	0.109	0.654	0.183	0.432	0.0644	0.768	0.0622	0.776	0.237	0.333	-0.211	0.314	0.184	5.14	0.844	0.399	0.923	0.0786	0.794	0.115	0.634	0.0609	0.79	0.264	5.14	1.08	0.281	0.0321	0.875	-0.212	0.339
231794_at	1493	CTLA4	-0.257	0.00696	-0.0951	0.363	0.163	0.0908	0.0704	0.446	-0.0944	0.394	0.0884	0.404	-0.00102	0.992	0.101	0.31	-0.0292	0.793	0.278	0.00349	0.0117	5.59	0.118	0.906	0.985	-0.128	0.348	0.0433	0.693	-0.0438	0.674	0.219	5.59	1.97	0.0493	0.173	0.0628	0.096	0.34
214726_x_at	118	ADD1	-0.414	0.005	0.0573	0.723	-0.124	0.405	-0.0638	0.655	0.0339	0.843	0.0896	0.584	-0.0254	0.868	-0.136	0.377	0.0412	0.811	-0.101	0.492	0.201	8.41	1.32	0.189	1	0.0956	0.65	0.412	0.0151	0.0718	0.655	0.154	8.41	0.897	0.37	-0.0773	0.591	-0.148	0.34
203077_s_at	4087	SMAD2	0.257	0.000972	-0.108	0.205	0.13	0.0987	0.117	0.122	0.0685	0.449	-0.106	0.221	0.128	0.114	0.0343	0.672	0.072	0.429	0.0882	0.256	-0.134	4.66	-1.66	0.0968	1	0.06	0.59	0.0465	0.603	0.0369	0.664	-0.043	4.66	-0.473	0.636	-0.0505	0.506	0.0783	0.341
235635_at	394	ARHGAP5	0.5	0.00247	-0.0348	0.847	0.0979	0.557	0.394	0.0138	0.392	0.0411	-0.218	0.235	0.521	0.00241	0.311	0.0709	0.316	0.102	-0.0346	0.833	-0.0148	7.66	-0.0862	0.931	0.986	0.162	0.492	0.138	0.465	-0.148	0.411	-0.382	7.66	-1.98	0.0476	-0.191	0.236	0.166	0.341
226490_at	57224	NHSL1	0.412	0.0089	-0.00194	0.991	0.103	0.517	0.178	0.243	0.251	0.17	-0.0956	0.585	0.152	0.351	0.101	0.539	-0.0971	0.598	0.0577	0.713	0.0448	5.04	0.274	0.784	0.972	0.219	0.331	-0.0316	0.861	-0.111	0.516	-0.286	5.04	-1.56	0.12	-0.0418	0.785	0.158	0.342
200963_x_at	6160	RPL31	0.245	0.00533	0.119	0.218	0.00285	0.974	0.0423	0.619	-0.058	0.57	0.175	0.0724	0.00957	0.916	0.0743	0.417	0.136	0.185	0.16	0.0684	-0.00153	11.7	-0.0168	0.987	1	-0.129	0.303	0.0215	0.831	0.0637	0.506	-0.0921	11.7	-0.899	0.369	0.117	0.174	0.0877	0.344
210854_x_at	6535	SLC6A8	-0.404	0.00785	0.0891	0.593	-0.0249	0.871	-0.0134	0.927	0.144	0.414	0.179	0.29	0.195	0.215	-0.148	0.349	-0.0264	0.881	-0.285	0.0593	-0.0559	7.67	-0.355	0.723	1	-0.00956	0.965	0.308	0.0775	-0.0748	0.651	-0.0363	7.67	-0.205	0.838	-0.242	0.103	-0.151	0.346
207945_s_at	1453	CSNK1D	-0.436	0.00127	-0.097	0.513	-0.125	0.359	-0.0834	0.525	0.0443	0.778	-0.0232	0.877	-0.0511	0.715	-0.232	0.1	-0.0718	0.65	0.0141	0.917	-0.355	5.76	-2.53	0.0116	1	-0.0129	0.947	0.152	0.327	-0.217	0.142	-0.00338	5.76	-0.0215	0.983	-0.00112	0.993	-0.134	0.349
233650_at	80254	CEP63	-0.234	0.00842	0.0135	0.89	-0.0871	0.331	-0.0184	0.83	0.0259	0.801	-0.13	0.189	-0.0222	0.81	0.0564	0.542	-0.0235	0.821	0.0859	0.332	0.0672	5.37	0.729	0.466	0.923	0.0158	0.901	0.0668	0.513	-0.00995	0.918	0.0395	5.37	0.381	0.703	0.116	0.18	-0.0875	0.35
219583_s_at	55812	SPATA7	0.216	0.0034	-0.0742	0.359	0.0395	0.596	-0.0308	0.667	0.0215	0.801	0.0397	0.628	0.0166	0.828	0.09	0.242	-0.0484	0.575	0.0601	0.414	-0.00948	4.59	-0.124	0.902	1	0.067	0.525	0.0626	0.46	0.0182	0.821	0.081	4.59	0.942	0.347	-0.158	0.0282	-0.0725	0.351
238944_at	100505715	LOC100505715	0.368	0.00295	0.151	0.267	0.145	0.245	0.103	0.392	0.185	0.197	0.14	0.308	0.206	0.108	0.0169	0.895	0.2	0.166	0.141	0.252	-0.115	7.26	-0.893	0.372	0.923	-0.142	0.424	0.178	0.212	0.27	0.0453	-0.00692	7.26	-0.0479	0.962	0.0558	0.644	0.121	0.354
202289_s_at	10579	TACC2	0.458	0.00162	-0.0248	0.876	0.107	0.465	-0.0336	0.811	0.152	0.366	-0.0515	0.749	-0.0382	0.8	0.097	0.521	0.189	0.265	0.0298	0.837	-0.0179	6.09	-0.119	0.905	1	0.115	0.581	-0.304	0.0689	0.0296	0.852	0.122	6.09	0.718	0.473	-0.0697	0.622	-0.142	0.355
211051_s_at	2137	EXTL3	-0.265	0.00225	0.0636	0.504	-0.0061	0.944	-0.0844	0.316	-0.00236	0.981	-0.0432	0.654	0.0305	0.735	-0.15	0.0979	-0.0204	0.84	0.0326	0.706	0.105	5.71	1.17	0.243	1	0.0436	0.725	0.216	0.0306	-0.00871	0.927	0.103	5.71	1.02	0.307	0.0792	0.35	-0.0842	0.358
234687_x_at	8994	LIMD1	-0.178	0.0088	0.0223	0.765	-0.0583	0.394	0.0651	0.322	-0.072	0.36	0.00902	0.905	0.13	0.0642	-0.0241	0.733	-0.0956	0.228	0.0803	0.235	-0.0161	8.15	-0.229	0.819	0.977	0.00474	0.961	0.0481	0.537	0.0246	0.739	0.0949	8.15	1.2	0.23	0.13	0.0499	-0.0656	0.359
212843_at	4684	NCAM1	0.407	0.00984	-0.123	0.477	0.332	0.0378	-0.0617	0.687	0.108	0.554	-0.0865	0.622	0.0786	0.631	-0.0924	0.574	0.19	0.304	-0.0858	0.585	-0.237	9.13	-1.45	0.149	1	0.0989	0.661	-0.158	0.384	-0.166	0.334	-0.0105	9.13	-0.0572	0.954	-0.128	0.407	-0.153	0.36
200817_x_at	6204	RPS10	0.275	0.00499	-0.0454	0.672	0.0843	0.394	0.187	0.0492	0.0399	0.726	0.141	0.196	0.0357	0.725	0.00175	0.986	0.0399	0.727	0.216	0.027	-0.0861	11.3	-0.847	0.397	1	0.000722	0.996	-0.0373	0.74	-0.0516	0.628	-0.167	11.3	-1.46	0.144	0.0483	0.613	0.0945	0.36
213588_x_at	9045	RPL14	0.352	0.00531	0.0959	0.489	0.182	0.155	0.125	0.308	0.00809	0.956	0.165	0.24	-0.105	0.425	0.0538	0.683	0.0231	0.876	0.0952	0.45	-0.176	11	-1.34	0.18	1	0.0393	0.828	-0.234	0.108	0.0468	0.734	-0.211	11	-1.43	0.152	0.0584	0.636	0.122	0.361
201156_s_at	5878	RAB5C	-0.505	0.000985	-0.0209	0.901	-0.236	0.127	-0.104	0.482	0.136	0.443	-0.00862	0.96	-0.0471	0.766	-0.0723	0.65	0.24	0.18	-0.0431	0.777	-0.176	6.86	-1.11	0.269	1	0.188	0.389	0.402	0.0223	-0.0548	0.742	0.114	6.86	0.642	0.521	-0.172	0.249	-0.147	0.362
231824_at	55132	LARP1B	0.154	0.00885	-0.0383	0.553	-0.0169	0.776	-0.0914	0.109	-0.0251	0.713	0.00722	0.912	-0.0982	0.108	-0.0786	0.199	-0.0372	0.588	0.0412	0.482	0.0541	3.78	0.887	0.375	0.923	0.035	0.677	0.0485	0.473	-0.0786	0.22	-0.0442	3.78	-0.644	0.52	-0.0305	0.595	0.0564	0.364
226461_at	3219	HOXB9	-0.24	0.00212	-0.0646	0.449	0.105	0.182	0.0872	0.248	0.0161	0.859	-0.0541	0.532	0.128	0.114	0.0676	0.404	-0.0648	0.477	0.221	0.00441	0.055	6.97	0.68	0.497	0.926	-0.0164	0.883	0.0188	0.834	-0.0158	0.852	0.167	6.97	1.84	0.0662	0.128	0.0929	0.0746	0.364
204421_s_at	2247	FGF2	-0.35	0.00773	-0.175	0.224	-0.188	0.157	0.0283	0.824	0.0389	0.798	-0.153	0.293	-0.199	0.144	-0.0698	0.61	-0.191	0.213	0.142	0.279	0.0728	6.07	0.535	0.593	1	0.0314	0.867	0.15	0.32	-0.135	0.347	-0.109	6.07	-0.711	0.477	0.1	0.433	-0.125	0.367
204569_at	22858	ICK	0.119	0.0094	-0.0541	0.283	-0.00619	0.894	0.00325	0.942	-0.0041	0.939	-0.0647	0.205	0.0628	0.187	0.00712	0.882	0.0986	0.0664	0.0154	0.736	0.0166	3.8	0.349	0.727	1	0.0232	0.724	0.0559	0.289	0.0048	0.924	-0.0287	3.8	-0.537	0.592	-0.0474	0.29	0.0437	0.367
221618_s_at	51616	TAF9B	-0.318	0.00455	-0.111	0.368	-0.0763	0.5	-0.107	0.324	0.0324	0.803	-0.138	0.268	0.0408	0.726	-0.159	0.174	0.116	0.376	0.106	0.344	0.00649	4.47	0.0558	0.956	1	0.0427	0.79	0.431	0.00086	-0.0562	0.645	0.0654	4.47	0.5	0.617	-0.174	0.112	-0.106	0.37
205045_at	11216	AKAP10	-0.199	0.00347	-0.0896	0.231	-0.00954	0.89	-0.0626	0.343	0.033	0.677	0.0526	0.487	-0.000963	0.989	-0.0922	0.194	0.0806	0.312	0.0209	0.758	0.0706	4.84	0.998	0.319	1	-0.149	0.127	0.131	0.0945	0.0175	0.814	0.0499	4.84	0.627	0.531	-0.00847	0.899	-0.0644	0.371
202151_s_at	10422	UBAC1	0.309	0.00478	-0.084	0.485	0.273	0.0137	-0.141	0.185	0.288	0.0238	0.074	0.543	0.293	0.0102	0.132	0.246	0.284	0.0266	0.0887	0.417	0.00443	7.29	0.039	0.969	1	-0.198	0.206	0.0948	0.452	-0.0974	0.415	0.0469	7.29	0.367	0.713	-0.157	0.142	0.103	0.372
214959_s_at	8539	API5	-0.228	0.00573	-0.0237	0.794	-0.206	0.0138	-0.0354	0.658	-0.00664	0.945	0.0181	0.844	0.0136	0.874	0.000901	0.992	-0.0319	0.741	0.0299	0.716	0.112	4.99	1.3	0.193	1	-0.157	0.183	0.234	0.0138	0.0499	0.579	0.0479	4.99	0.497	0.619	0.0936	0.246	-0.0777	0.373
212297_at	79572	ATP13A3	0.264	0.00421	-0.106	0.296	0.106	0.256	-0.0707	0.43	0.0719	0.502	-0.0823	0.422	0.102	0.286	0.138	0.153	0.164	0.13	0.0765	0.405	0.0274	5.17	0.286	0.775	1	0.0812	0.539	-0.144	0.175	0.00163	0.987	-0.158	5.17	-1.47	0.143	-0.0895	0.32	0.0863	0.376
230056_at	2186	BPTF	0.207	0.000454	-0.0101	0.875	0.0543	0.36	0.106	0.0632	0.0671	0.326	-0.0408	0.532	0.12	0.0496	0.0165	0.787	0.036	0.601	0.0195	0.74	0.0341	3.65	0.559	0.577	0.937	0.05	0.553	-0.0349	0.606	0.0566	0.377	-0.141	3.65	-2.05	0.0408	-0.0489	0.394	0.0545	0.38
229145_at	119504	ANAPC16	0.61	0.000961	0.0518	0.798	0.316	0.0905	0.124	0.49	0.286	0.182	0.0327	0.873	0.341	0.0755	0.111	0.562	0.218	0.313	-0.0292	0.874	-0.211	6.19	-1.1	0.271	0.923	0.0768	0.771	-0.0648	0.76	-0.0617	0.759	-0.265	6.19	-1.23	0.218	-0.102	0.569	0.17	0.383
214953_s_at	351	APP	-0.659	0.00293	0.192	0.43	-0.172	0.443	-0.13	0.546	-0.0177	0.945	-0.577	0.0191	-0.0174	0.94	0.0544	0.813	0.5	0.0534	0.0649	0.769	-0.185	9.33	-0.804	0.422	1	0.125	0.692	0.204	0.424	-0.0726	0.763	0.00672	9.33	0.026	0.979	-0.602	0.00544	-0.204	0.383
228044_at	387923	SERP2	0.332	0.00391	0.191	0.131	0.00337	0.977	0.00569	0.959	0.111	0.407	-0.0919	0.473	0.212	0.076	0.0362	0.762	0.211	0.117	-0.105	0.359	0.00287	7.9	0.024	0.981	0.997	-0.159	0.336	-0.134	0.311	0.0777	0.536	-0.113	7.9	-0.84	0.401	-0.186	0.0972	0.106	0.384
201167_x_at	396	ARHGDIA	-0.534	0.00297	0.109	0.579	-0.189	0.298	-0.172	0.325	0.0122	0.954	0.233	0.243	0.0386	0.836	-0.249	0.184	-0.0919	0.662	-0.178	0.32	0.113	5.41	0.605	0.546	1	0.0937	0.715	0.133	0.52	-0.0381	0.846	-0.011	5.41	-0.0525	0.958	-0.0479	0.785	-0.164	0.386
209674_at	1407	CRY1	0.351	0.00076	-0.00618	0.957	0.251	0.0171	0.135	0.183	0.302	0.0127	0.0479	0.678	0.16	0.138	0.161	0.138	0.181	0.137	0.0948	0.36	0.173	4.37	1.6	0.11	1	0.133	0.371	0.188	0.117	0.0489	0.666	-0.0425	4.37	-0.351	0.726	-0.065	0.522	0.0948	0.388
226884_at	57633	LRRN1	0.367	0.00749	0.275	0.0679	0.0699	0.614	0.173	0.193	0.176	0.268	0.0271	0.859	0.0203	0.886	0.117	0.413	0.0567	0.724	-0.0931	0.495	-0.0332	4.01	-0.233	0.816	0.977	0.169	0.39	0.1	0.525	-0.0213	0.887	-0.0517	4.01	-0.324	0.746	-0.162	0.225	0.125	0.388
201036_s_at	3033	HADH	0.52	0.000506	-0.107	0.514	0.347	0.0216	0.05	0.73	0.0923	0.594	-0.113	0.497	0.196	0.205	0.14	0.369	0.208	0.234	0.268	0.0716	0.000294	5.98	0.0019	0.998	1	0.0903	0.672	0.145	0.398	-0.0688	0.672	-0.0393	5.98	-0.226	0.822	-0.224	0.124	0.136	0.39
235911_at	4241	MFI2	0.351	0.00314	0.12	0.356	0.15	0.21	-0.00472	0.967	0.213	0.123	0.0943	0.474	0.194	0.115	0.106	0.39	0.284	0.0411	0.103	0.381	0.0308	6.31	0.25	0.802	0.976	-0.132	0.438	-0.0536	0.694	0.0723	0.576	0.198	6.31	1.43	0.153	0.182	0.116	0.107	0.392
209153_s_at	6929	TCF3	0.245	0.00408	0.0433	0.643	0.263	0.00226	0.067	0.417	0.175	0.0765	0.0683	0.47	0.199	0.0247	0.0643	0.468	-0.0057	0.954	0.0928	0.274	-0.0243	5.22	-0.275	0.784	1	0.0574	0.638	-0.0296	0.762	0.0794	0.392	0.0805	5.22	0.811	0.418	0.06	0.47	0.0765	0.395
211623_s_at	2091	FBL	0.306	0.00372	0.0287	0.804	0.202	0.0582	0.126	0.218	0.0203	0.869	0.109	0.354	0.194	0.0766	0.0618	0.574	0.139	0.259	0.281	0.00769	-0.116	8.2	-1.06	0.29	1	-0.0559	0.711	0.191	0.117	-0.00542	0.962	0.0364	8.2	0.296	0.767	0.0064	0.95	0.0948	0.395
224919_at	64968	MRPS6	0.47	0.00125	0.272	0.0888	0.248	0.092	0.253	0.0735	0.578	0.000651	0.265	0.102	0.172	0.253	0.397	0.00893	0.313	0.0663	0.125	0.387	0.324	7.95	2.15	0.032	0.923	0.0697	0.738	0.0872	0.602	0.0831	0.6	-0.0607	7.95	-0.358	0.721	-0.0561	0.693	0.13	0.395
202642_s_at	8295	TRRAP	0.295	0.00493	-0.0974	0.397	0.124	0.242	0.0095	0.926	0.0705	0.562	-0.0464	0.69	0.0667	0.54	0.173	0.113	0.0737	0.547	0.00694	0.947	0.0312	6.51	0.286	0.775	1	0.0792	0.598	-0.108	0.372	-0.0565	0.621	-0.0127	6.51	-0.104	0.917	-0.177	0.0841	0.0939	0.396
208988_at	22992	KDM2A	0.421	0.0064	-0.178	0.293	0.0285	0.855	0.0445	0.766	0.0651	0.716	-0.271	0.114	-0.0133	0.934	0.134	0.405	0.108	0.55	0.0282	0.855	0.0737	6.37	0.46	0.646	1	0.157	0.477	0.00694	0.969	-0.0306	0.856	0.0171	6.37	0.0949	0.924	-0.303	0.0443	0.136	0.404
204839_at	51367	POP5	0.293	0.00953	-0.0443	0.721	0.154	0.176	0.0776	0.479	0.0631	0.63	-0.0452	0.719	0.0162	0.89	0.126	0.282	0.0499	0.705	0.0384	0.733	-0.15	7.1	-1.28	0.201	1	0.126	0.437	0.0591	0.649	0.0357	0.772	-0.0472	7.1	-0.358	0.72	-0.132	0.231	0.0995	0.404
213217_at	108	ADCY2	0.304	0.00641	-0.056	0.647	0.214	0.0573	0.131	0.226	0.399	0.00214	0.0379	0.759	0.0826	0.475	0.154	0.185	0.129	0.321	0.167	0.134	-0.02	9.63	-0.173	0.863	1	-0.0668	0.675	0.235	0.067	-0.0459	0.706	-0.104	9.63	-0.803	0.422	0.0556	0.609	0.0977	0.407
203068_at	9903	KLHL21	0.429	0.000595	0.00789	0.954	0.344	0.00637	-0.07	0.562	0.14	0.335	0.112	0.418	0.23	0.0752	0.141	0.277	0.0905	0.535	0.294	0.0181	0.0306	6.9	0.236	0.813	1	0.034	0.849	-0.149	0.298	0.0436	0.748	0.0183	6.9	0.126	0.9	0.13	0.286	0.109	0.407
217938_s_at	56888	KCMF1	0.335	0.00169	0.0572	0.625	0.159	0.14	0.173	0.0944	0.293	0.0182	0.0262	0.825	-0.00632	0.954	0.0883	0.427	0.106	0.396	0.0503	0.636	0.0118	8.52	0.107	0.915	1	0.0326	0.831	0.065	0.596	-0.168	0.15	0.00286	8.52	0.023	0.982	-0.19	0.068	0.0929	0.409
205566_at	11057	ABHD2	-0.288	0.0036	-0.0673	0.534	-0.212	0.0341	0.118	0.217	-0.0886	0.44	0.0609	0.579	-0.034	0.74	-0.0841	0.413	-0.121	0.293	-0.0301	0.759	0.0971	6.55	0.947	0.344	1	-0.049	0.729	0.11	0.334	0.102	0.342	0.138	6.55	1.2	0.232	0.101	0.294	0.0848	0.416
208066_s_at	2959	GTF2B	0.345	0.00431	-0.0646	0.626	0.133	0.276	-0.0416	0.722	0.0564	0.687	0.134	0.319	0.0834	0.506	0.0672	0.593	0.309	0.0288	0.107	0.372	-0.00198	7.14	-0.0158	0.987	1	-0.112	0.516	-0.0239	0.863	-0.0719	0.585	-0.115	7.14	-0.816	0.415	-0.21	0.0748	-0.103	0.418
224730_at	10238	DCAF7	-0.353	0.00392	-0.12	0.369	-0.175	0.157	0.0861	0.467	-0.0957	0.5	-0.217	0.11	0.114	0.37	0.0225	0.86	0.269	0.0594	0.105	0.388	0.0511	6.83	0.403	0.687	0.956	0.0379	0.828	0.47	0.000853	-0.139	0.298	0.13	6.83	0.911	0.362	-0.0133	0.911	-0.104	0.421
225478_at	9258	MFHAS1	0.254	0.00878	0.0561	0.598	-0.0371	0.704	-0.0409	0.664	0.206	0.0675	-0.14	0.195	0.224	0.026	-0.0136	0.893	0.216	0.0568	0.0662	0.493	-0.0212	7.65	-0.211	0.833	0.977	0.0368	0.791	-0.0409	0.714	-0.0636	0.548	-0.0806	7.65	-0.713	0.476	0.000221	0.998	-0.0822	0.422
202106_at	2802	GOLGA3	0.362	0.00389	-0.00598	0.965	0.129	0.308	0.0274	0.821	0.127	0.381	0.228	0.101	0.254	0.0511	0.00684	0.958	0.065	0.657	0.185	0.139	0.0331	7.61	0.255	0.799	1	-0.0128	0.943	-0.23	0.11	0.0937	0.492	0.0918	7.61	0.629	0.53	-0.0812	0.506	-0.106	0.423
214745_at	23007	PLCH1	0.335	0.000435	-0.0689	0.509	-0.084	0.382	0.0452	0.624	-0.0168	0.879	-0.0252	0.811	-0.058	0.557	0.171	0.0851	-0.0123	0.912	0.0885	0.35	-0.0342	5.29	-0.346	0.729	1	-0.00564	0.967	-0.113	0.302	-0.0985	0.342	-0.037	5.29	-0.333	0.739	0.0579	0.533	-0.0802	0.424
221706_s_at	55850	USE1	0.292	0.00181	0.0475	0.643	0.148	0.118	0.0967	0.286	0.0742	0.494	0.202	0.0517	0.113	0.243	0.0253	0.795	0.139	0.202	-0.0325	0.727	0.0225	6.3	0.232	0.817	1	0.0805	0.547	-0.139	0.197	0.0704	0.489	0.0749	6.3	0.687	0.493	0.052	0.568	0.0788	0.425
212655_at	23174	ZCCHC14	0.513	0.000211	-0.128	0.397	0.197	0.157	0.0119	0.929	0.255	0.112	0.084	0.584	0.205	0.152	0.311	0.0305	0.217	0.178	0.104	0.449	0.0239	7.37	0.167	0.868	1	0.203	0.305	0.105	0.509	-0.0483	0.748	0.0232	7.37	0.144	0.885	-0.107	0.426	0.116	0.425
234956_at	93444	LOC93444	-0.212	0.00387	-0.0137	0.865	-0.216	0.00369	0.013	0.856	0.0664	0.436	0.087	0.286	-0.0511	0.502	-0.0333	0.663	-0.143	0.0958	-0.0298	0.683	0.0922	8.13	1.21	0.227	0.923	-0.0204	0.846	0.0193	0.819	0.0531	0.507	0.0159	8.13	0.186	0.853	-0.0476	0.507	-0.0616	0.426
213941_x_at	6201	RPS7	0.368	0.00836	-0.167	0.275	0.214	0.13	0.117	0.388	-0.0355	0.827	0.0597	0.7	0.0624	0.667	0.00512	0.972	0.0466	0.775	0.275	0.0486	-0.0675	10.2	-0.465	0.642	1	-0.148	0.46	-0.0885	0.581	-0.0658	0.665	-0.22	10.2	-1.35	0.176	0.0595	0.662	0.117	0.427
228075_x_at	51106	TFB1M	0.165	0.007	-0.0298	0.658	0.0567	0.359	0.111	0.0628	0.0114	0.873	0.023	0.736	0.0153	0.81	0.064	0.315	0.0705	0.324	-0.0144	0.814	-0.0332	6.55	-0.522	0.602	0.942	0.0593	0.499	-0.0838	0.234	0.0339	0.612	0.0124	6.55	0.174	0.862	0.0172	0.774	0.0513	0.428
214053_at	2066	ERBB4	0.331	0.00427	0.14	0.272	0.0864	0.46	0.186	0.098	0.0373	0.781	-0.109	0.396	0.00965	0.936	0.124	0.305	0.126	0.351	0.143	0.215	-0.00906	7.81	-0.0754	0.94	1	-0.0172	0.917	0.244	0.0667	0.0453	0.719	0.0358	7.81	0.265	0.791	-0.00886	0.937	0.0966	0.429
217562_at	339479	FAM5C	0.278	0.00325	-0.0532	0.607	-0.0736	0.44	-0.00153	0.987	-0.0108	0.921	-0.218	0.038	-0.0926	0.344	0.0639	0.515	0.0253	0.819	0.0134	0.886	-0.0701	4.65	-0.716	0.474	1	0.0803	0.552	-0.0376	0.728	-0.00811	0.937	-0.106	4.65	-0.965	0.335	-0.104	0.259	-0.0775	0.436
218007_s_at	51065	RPS27L	0.416	0.00728	-0.247	0.147	0.361	0.0213	0.214	0.155	0.0637	0.724	0.0393	0.819	0.122	0.45	0.148	0.36	0.202	0.264	0.239	0.122	-0.0834	9	-0.518	0.605	1	-0.0854	0.7	0.147	0.41	-0.261	0.123	-0.406	9	-2.25	0.0249	-0.111	0.461	0.127	0.437
232297_at	51088	KLHL5	0.444	0.00453	-0.0363	0.832	0.0632	0.689	0.121	0.424	0.17	0.35	-0.145	0.403	0.264	0.104	0.133	0.414	0.147	0.42	-0.166	0.286	-0.0856	5.7	-0.528	0.598	0.942	0.256	0.253	0.0414	0.818	0.0444	0.794	-0.296	5.7	-1.62	0.105	-0.185	0.224	0.128	0.438
228396_at	5592	PRKG1	0.355	0.000708	-0.0189	0.869	0.0177	0.867	0.185	0.0691	0.196	0.107	0.0158	0.892	0.305	0.00516	0.12	0.27	0.118	0.337	0.0283	0.786	0.043	7.21	0.395	0.693	0.956	0.181	0.227	0.117	0.33	0.0141	0.902	-0.0232	7.21	-0.19	0.849	-0.0451	0.659	0.0853	0.44
221643_s_at	473	RERE	-0.396	0.00935	-0.0359	0.83	-0.113	0.461	-0.0509	0.73	0.0822	0.642	-0.12	0.48	0.00464	0.977	-0.0984	0.535	0.19	0.286	0.0553	0.715	-0.0112	5.73	-0.0706	0.944	1	-0.12	0.581	0.424	0.0156	0.0804	0.628	0.337	5.73	1.9	0.058	-0.0244	0.869	-0.123	0.443
209505_at	7025	NR2F1	0.432	0.0078	-0.306	0.0859	0.0856	0.601	-0.0213	0.892	0.16	0.397	-0.248	0.17	0.0134	0.937	0.194	0.25	0.351	0.0646	0.105	0.517	0.208	7.54	1.23	0.218	1	0.0334	0.886	0.0765	0.682	-0.165	0.352	-0.14	7.54	-0.739	0.46	-0.284	0.0733	0.131	0.445
202029_x_at	6169	RPL38	0.204	0.00908	-0.0133	0.877	0.117	0.141	0.131	0.0851	0.00982	0.914	0.176	0.0436	-0.00867	0.915	0.0671	0.411	0.0733	0.423	0.172	0.028	-0.0599	11.8	-0.736	0.462	1	-0.0643	0.566	-0.0534	0.553	0.0481	0.573	-0.0728	11.8	-0.797	0.425	0.126	0.1	0.0619	0.454
208796_s_at	900	CCNG1	0.448	0.0042	-0.0846	0.622	0.241	0.127	0.0314	0.836	0.268	0.141	0.0998	0.566	0.226	0.165	0.24	0.141	0.1	0.584	0.195	0.211	0.0653	7.85	0.402	0.688	1	0.065	0.772	0.19	0.291	-0.0137	0.936	-0.249	7.85	-1.36	0.173	-0.106	0.489	0.123	0.455
242443_at	161436	EML5	0.429	0.00206	0.11	0.473	0.0154	0.913	-0.0468	0.729	0.169	0.295	-0.122	0.431	0.225	0.12	0.117	0.42	0.336	0.039	-0.148	0.286	-0.0628	5.31	-0.435	0.664	0.956	0.056	0.779	0.0716	0.654	-0.099	0.514	-0.117	5.31	-0.72	0.472	-0.179	0.187	0.109	0.46
200032_s_at	6133	RPL9	0.303	0.00308	-0.0655	0.559	-0.096	0.452	0.0705	0.565	0.0714	0.626	0.0648	0.568	0.36	0.00623	0.2	0.13	0.3	0.0428	0.212	0.0373	-0.0841	11.2	-0.641	0.522	0.932	-0.238	0.189	0.0431	0.767	-0.0775	0.574	-0.426	11.2	-2.89	0.004	-0.0289	0.815	0.0796	0.461
209656_s_at	83604	TMEM47	0.704	0.000288	-0.135	0.525	0.4	0.0414	0.227	0.226	0.404	0.0729	-0.00959	0.964	0.336	0.0948	0.256	0.205	0.307	0.175	0.302	0.117	0.206	8.98	1.02	0.307	1	0.0623	0.822	0.535	0.0165	-0.0477	0.821	-0.351	8.98	-1.55	0.121	-0.0478	0.8	0.151	0.461
209729_at	10634	GAS2L1	0.36	0.00138	-0.0491	0.691	0.325	0.00437	-0.00271	0.98	0.177	0.175	0.19	0.129	0.147	0.209	0.0362	0.757	0.159	0.228	0.112	0.317	-0.0154	7.91	-0.132	0.895	1	0.0203	0.9	-0.117	0.367	-0.0712	0.562	0.0114	7.91	0.0869	0.931	0.223	0.0421	0.0875	0.461
230201_at	8087	FXR1	0.279	0.0047	-0.149	0.168	0.137	0.168	0.278	0.00373	0.1	0.381	-0.0432	0.693	0.228	0.026	0.0764	0.457	-0.0144	0.901	0.0834	0.396	-0.118	5.36	-1.15	0.249	0.923	-0.0584	0.679	-0.0316	0.781	-0.085	0.429	-0.198	5.36	-1.72	0.0864	-0.206	0.0327	0.0767	0.461
205026_at	6777	STAT5B	-0.229	0.00395	0.081	0.352	-0.0295	0.713	0.0958	0.213	0.0679	0.461	0.104	0.24	0.0631	0.444	-0.031	0.707	-0.121	0.192	0.154	0.0515	-0.0708	5.83	-0.859	0.391	1	0.0169	0.881	0.0462	0.612	-0.00127	0.988	-0.132	5.83	-1.42	0.156	0.149	0.0543	-0.0613	0.464
242669_at	51569	UFM1	0.389	0.00084	-0.209	0.102	0.286	0.015	0.0868	0.441	0.0529	0.695	0.0224	0.862	0.14	0.247	-0.0197	0.871	-0.0771	0.57	0.153	0.186	-0.182	4.39	-1.51	0.132	0.923	0.00848	0.959	-0.0732	0.584	0.0877	0.489	-0.291	4.39	-2.15	0.0321	-0.0169	0.882	0.0888	0.469
205771_s_at	9465	AKAP7	0.332	0.00338	-0.0568	0.647	0.011	0.923	0.00492	0.964	0.123	0.351	-0.0841	0.503	0.144	0.219	0.135	0.252	0.0282	0.831	0.104	0.356	0.00824	6.26	0.0702	0.944	1	0.183	0.258	0.0129	0.921	-0.029	0.814	-0.121	6.26	-0.92	0.358	-0.0219	0.843	0.0857	0.473
226243_at	391356	PTRHD1	0.369	0.00593	0.0541	0.713	0.112	0.409	0.168	0.198	0.063	0.686	0.0885	0.553	0.318	0.0225	0.141	0.313	0.184	0.242	0.00843	0.95	-0.18	8.01	-1.29	0.197	0.923	-0.0282	0.883	-0.0408	0.791	-0.211	0.149	-0.229	8.01	-1.46	0.144	-0.164	0.212	0.101	0.475
212673_at	23173	METAP1	0.29	0.00178	0.0313	0.758	-0.0449	0.631	-0.136	0.129	-0.102	0.342	0.042	0.683	0.0386	0.688	-0.0505	0.6	0.141	0.193	0.112	0.223	0.0795	7.22	0.827	0.408	1	0.0525	0.692	0.00295	0.978	0.0605	0.549	0.0126	7.22	0.117	0.907	-0.124	0.17	-0.0688	0.481
221519_at	6468	FBXW4	0.358	0.00359	-0.0122	0.928	0.15	0.225	0.187	0.116	0.169	0.236	0.196	0.151	0.272	0.0328	0.207	0.105	0.0724	0.614	0.172	0.16	0.00879	8.07	0.0689	0.945	1	0.0676	0.7	0.177	0.211	0.18	0.18	0.0704	8.07	0.492	0.623	-0.0277	0.817	0.0912	0.481
221785_at	58525	WIZ	-0.351	0.00148	0.063	0.603	-0.0211	0.85	-0.0508	0.635	0.181	0.157	0.302	0.0141	-0.0491	0.668	-0.0218	0.85	-0.0398	0.757	-0.336	0.00228	0.192	5.47	1.68	0.0943	1	0.0165	0.917	0.0805	0.525	0.102	0.398	-0.066	5.47	-0.514	0.608	0.0983	0.361	-0.0813	0.485
208445_s_at	9031	BAZ1B	0.247	0.00909	-0.0268	0.797	0.268	0.00532	0.11	0.231	0.0785	0.476	0.117	0.268	0.167	0.0897	0.186	0.0594	0.187	0.0912	0.218	0.0214	0.0222	7.88	0.225	0.822	1	-0.0851	0.53	0.0181	0.868	-0.051	0.622	0.0717	7.88	0.648	0.517	-0.0578	0.533	0.0697	0.486
230146_s_at	23413	NCS1	-0.607	0.000759	0.0175	0.93	-0.0832	0.647	-0.15	0.391	-0.0672	0.748	0.0261	0.896	0.0244	0.896	0.0833	0.657	0.0319	0.879	-0.0784	0.662	-0.0241	6.54	-0.129	0.898	0.983	0.173	0.502	0.327	0.114	-0.0819	0.676	0.159	6.54	0.759	0.448	-0.209	0.233	-0.132	0.486
226604_at	160418	TMTC3	0.433	0.00795	-0.0107	0.952	0.271	0.101	0.15	0.342	0.233	0.219	-0.161	0.374	0.345	0.0414	0.146	0.39	0.395	0.0387	-0.00885	0.957	-0.0343	6.43	-0.203	0.839	0.979	0.172	0.462	-0.162	0.388	-0.232	0.191	-0.224	6.43	-1.18	0.239	-0.182	0.252	0.12	0.487
212875_s_at	25966	C2CD2	0.321	0.00744	0.0442	0.737	0.138	0.255	0.0407	0.727	0.0628	0.652	-0.0258	0.847	0.0984	0.429	0.0407	0.745	-0.0287	0.838	0.066	0.581	-0.0556	7.62	-0.446	0.656	1	-0.0455	0.791	-0.0063	0.964	-0.00871	0.947	-0.0219	7.62	-0.157	0.875	0.00264	0.982	0.0881	0.487
228843_at	285598	ARL10	0.341	0.00806	-0.000786	0.996	0.239	0.0666	0.156	0.213	0.219	0.142	0.0343	0.81	0.16	0.232	0.244	0.0691	0.326	0.0306	-0.0668	0.603	0.127	7.35	0.951	0.342	0.923	0.257	0.164	-0.25	0.0917	-0.148	0.29	0.0172	7.35	0.115	0.909	-0.215	0.0873	0.0944	0.487
242139_s_at	100507739	ERVK3-1	0.238	0.00955	0.0591	0.557	0.176	0.0586	0.0661	0.458	0.042	0.693	0.11	0.279	0.11	0.248	0.0259	0.786	0.136	0.205	0.129	0.159	0.0569	7.74	0.597	0.551	0.934	0.0872	0.507	-0.0149	0.888	-0.0673	0.501	-0.0758	7.74	-0.708	0.479	-0.0666	0.457	0.0671	0.488
201559_s_at	25932	CLIC4	-0.68	0.00309	-0.561	0.0263	-0.397	0.0875	-0.137	0.54	-0.278	0.297	-0.183	0.474	-0.00505	0.983	-0.127	0.597	0.0791	0.768	0.0419	0.855	-0.209	7.45	-0.875	0.382	1	0.206	0.531	0.649	0.0142	-0.572	0.0226	-0.295	7.45	-1.1	0.272	-0.314	0.161	-0.168	0.489
202518_at	9275	BCL7B	0.297	0.00298	0.0548	0.616	0.114	0.258	-0.0173	0.858	0.0686	0.554	0.133	0.231	0.1	0.334	0.08	0.442	0.0996	0.393	-0.0153	0.878	0.00413	7.25	0.0398	0.968	1	0.0657	0.645	-0.217	0.0592	-0.0302	0.781	0.155	7.25	1.33	0.183	-0.0994	0.307	-0.0728	0.49
203637_s_at	4281	MID1	0.385	0.00332	-0.234	0.103	-0.0316	0.811	0.118	0.352	-0.11	0.469	0.0155	0.915	-0.0626	0.645	0.042	0.758	-0.21	0.169	0.0445	0.733	-0.178	6.55	-1.31	0.191	1	0.122	0.514	0.157	0.296	0.00338	0.981	-0.279	6.55	-1.83	0.0678	0.0656	0.608	0.0947	0.493
201751_at	9929	JOSD1	0.248	0.00893	-0.0534	0.608	0.00408	0.966	-0.0568	0.537	0.131	0.234	-0.0416	0.693	0.0663	0.5	0.061	0.537	0.167	0.132	0.0327	0.729	0.0233	8.07	0.237	0.813	1	-0.132	0.33	0.0599	0.583	-0.15	0.147	0.0123	8.07	0.111	0.912	-0.187	0.0433	-0.0677	0.499
209292_at	3400	ID4	0.841	0.00399	-0.191	0.551	0.188	0.524	0.248	0.381	0.169	0.618	-0.439	0.176	0.373	0.219	0.38	0.211	-0.148	0.664	0.406	0.163	0.101	6.06	0.332	0.74	1	0.563	0.178	0.708	0.0351	-0.0404	0.899	-0.445	6.06	-1.31	0.191	-0.241	0.397	0.207	0.502
217868_s_at	51108	METTL9	0.323	0.000804	0.0996	0.346	0.0693	0.477	0.00182	0.984	0.0853	0.446	0.0253	0.813	-0.0806	0.42	0.161	0.109	0.0839	0.456	0.0302	0.753	-0.0559	8.77	-0.559	0.576	1	0.0761	0.581	0.0905	0.414	0.0193	0.854	-0.126	8.77	-1.13	0.261	0.016	0.865	-0.068	0.504
223495_at	83987	CCDC8	-0.21	0.00363	-0.0446	0.573	0.0539	0.46	0.104	0.136	-0.0247	0.768	0.122	0.128	0.0574	0.444	0.0701	0.351	-0.188	0.0262	0.141	0.0499	0.0255	7.2	0.34	0.734	0.962	-0.154	0.137	0.13	0.117	0.0117	0.882	0.122	7.2	1.44	0.149	0.157	0.0262	0.0506	0.507
213374_x_at	26275	HIBCH	0.496	0.00339	-0.277	0.136	0.374	0.0288	0.18	0.273	0.0793	0.686	0.00494	0.979	0.281	0.11	0.229	0.194	0.176	0.374	0.25	0.138	-0.0488	6.17	-0.278	0.781	1	0.0531	0.826	0.191	0.325	0.0411	0.824	-0.0409	6.17	-0.208	0.836	-0.0843	0.609	0.118	0.508
200803_s_at	7009	TMBIM6	-0.457	0.00927	-0.107	0.577	-0.18	0.311	-0.139	0.414	-0.0473	0.816	-0.156	0.423	0.0575	0.752	-0.145	0.428	0.194	0.344	-0.134	0.443	-0.0735	8.49	-0.403	0.687	1	0.0837	0.739	0.483	0.0168	-0.305	0.111	-0.201	8.49	-0.981	0.327	-0.192	0.263	-0.121	0.512
210816_s_at	1534	CYB561	-0.201	0.00797	0.113	0.172	-0.00657	0.932	0.0161	0.826	-0.0177	0.84	0.12	0.152	-0.0267	0.733	-0.0407	0.605	-0.0295	0.739	0.114	0.131	-0.0135	5.85	-0.172	0.864	1	-0.00175	0.987	-0.00565	0.948	0.0683	0.408	-0.0268	5.85	-0.303	0.762	0.161	0.0296	0.0522	0.513
200769_s_at	4144	MAT2A	-0.655	0.00246	-0.0403	0.865	-0.309	0.158	-0.142	0.498	0.0078	0.975	-0.0919	0.702	0.163	0.468	-0.142	0.53	0.107	0.673	0.183	0.395	0.00634	7.01	0.0282	0.977	1	0.0525	0.865	0.592	0.0175	-0.264	0.263	-0.117	7.01	-0.463	0.643	-0.233	0.27	-0.149	0.515
201385_at	1665	DHX15	0.358	0.00053	-0.151	0.184	0.174	0.0964	0.0116	0.908	0.116	0.332	-0.058	0.613	0.195	0.0688	0.0642	0.55	0.232	0.0548	0.149	0.147	0.0148	8.63	0.138	0.89	1	0.0102	0.945	0.0098	0.934	-0.00638	0.955	-0.133	8.63	-1.11	0.269	-0.0806	0.423	0.0709	0.515
203291_at	4850	CNOT4	0.361	0.00642	-0.0222	0.879	0.116	0.386	0.0352	0.784	0.152	0.322	-0.0813	0.581	0.0112	0.935	0.036	0.794	0.113	0.467	0.0712	0.589	-0.0274	7.15	-0.199	0.842	1	0.023	0.903	-0.118	0.438	-0.179	0.215	-0.0081	7.15	-0.0524	0.958	-0.173	0.182	-0.0906	0.517
203781_at	9553	MRPL33	0.255	0.00903	0.122	0.257	0.125	0.205	0.00213	0.982	0.0243	0.831	0.0139	0.898	0.155	0.126	0.055	0.589	0.337	0.00324	0.0769	0.43	0.091	7.99	0.897	0.37	1	0.0157	0.91	0.0574	0.609	0.0334	0.754	0.0449	7.99	0.394	0.693	-0.139	0.145	0.0669	0.517
218495_at	8409	UXT	0.447	0.00371	-0.128	0.45	0.289	0.0632	0.0493	0.742	0.0244	0.891	0.111	0.518	0.289	0.0705	0.134	0.404	0.292	0.105	0.289	0.0598	-0.209	7.42	-1.31	0.191	1	-0.019	0.931	-0.0333	0.851	-0.175	0.296	-0.119	7.42	-0.665	0.506	-0.0351	0.815	0.105	0.519
202330_s_at	7374	UNG	0.234	0.0098	-0.165	0.0968	0.0426	0.641	0.091	0.3	-0.0142	0.892	-0.0785	0.435	0.119	0.204	0.123	0.192	0.0862	0.415	0.0902	0.317	-0.0353	7	-0.376	0.707	1	0.0294	0.821	0.191	0.067	-0.0601	0.543	0.00942	7	0.0892	0.929	-0.0388	0.661	0.0612	0.522
238065_at	7170	TPM3	0.201	0.00133	0.0747	0.276	0.0478	0.449	0.0552	0.363	-0.0584	0.422	0.112	0.107	-0.045	0.489	0.029	0.656	0.141	0.0539	0.0475	0.446	-0.0355	4.94	-0.546	0.585	0.94	-0.0335	0.708	-0.0574	0.425	-0.000426	0.995	0.1	4.94	1.37	0.171	0.104	0.089	0.0422	0.523
214680_at	4915	NTRK2	-1.14	0.00591	-0.169	0.709	-0.434	0.299	-0.122	0.761	0.229	0.633	-0.26	0.571	0.404	0.346	-0.356	0.408	0.248	0.607	-0.192	0.64	0.273	8.02	0.637	0.524	1	0.0189	0.974	0.969	0.0416	-0.418	0.353	-0.00797	8.02	-0.0165	0.987	-0.417	0.301	-0.276	0.526
203714_s_at	6905	TBCE	0.191	0.00986	0.0554	0.496	0.0482	0.519	-0.0225	0.754	-0.0356	0.678	-0.0776	0.345	0.0376	0.625	-0.00844	0.913	0.0997	0.249	0.0856	0.246	0.071	6.77	0.924	0.356	1	-0.0432	0.684	-0.104	0.223	-0.00874	0.914	-0.0404	6.77	-0.467	0.64	-0.0564	0.435	0.0495	0.526
213050_at	23242	COBL	0.353	0.00546	0.0255	0.855	0.29	0.0241	0.0896	0.467	0.176	0.233	0.103	0.466	0.273	0.0386	0.16	0.228	0.267	0.0724	0.182	0.15	0.0331	9.46	0.251	0.802	1	0.0402	0.825	0.131	0.372	0.181	0.191	-0.0189	9.46	-0.127	0.899	-0.155	0.212	0.0849	0.527
213994_s_at	10418	SPON1	0.378	0.00511	-0.0559	0.706	0.19	0.164	0.161	0.218	0.155	0.322	-0.0716	0.633	0.13	0.355	0.137	0.33	0.0136	0.931	0.0521	0.698	-0.0658	5.77	-0.469	0.639	1	0.0586	0.761	0.312	0.0448	0.042	0.775	-0.102	5.77	-0.648	0.517	-0.134	0.31	-0.09	0.527
213572_s_at	1992	SERPINB1	-0.241	0.00957	-0.314	0.00223	-0.0696	0.459	0.0626	0.488	-0.145	0.18	-0.155	0.134	-0.119	0.217	0.00851	0.93	-0.00644	0.953	0.027	0.771	-0.0745	4.62	-0.77	0.441	1	-0.0685	0.607	-0.00323	0.976	-0.226	0.0264	-0.213	4.62	-1.96	0.0506	-0.0881	0.332	-0.0618	0.53
244334_at	133022	TRAM1L1	-0.187	0.00659	-0.117	0.123	0.0848	0.223	0.00108	0.987	-0.117	0.144	-0.131	0.0867	-0.0353	0.621	0.00112	0.988	-0.0481	0.55	0.0643	0.349	-0.105	6.43	-1.46	0.144	0.923	-0.0251	0.799	-0.0308	0.697	-0.15	0.0466	-0.107	6.43	-1.33	0.185	-0.131	0.051	-0.0455	0.531
231862_at	23468	CBX5	-0.514	0.00223	0.109	0.555	-0.205	0.226	-0.136	0.404	0.0308	0.874	-0.0984	0.598	0.0847	0.627	-0.0172	0.922	-0.0472	0.81	-0.127	0.447	0.199	5.75	1.14	0.253	0.923	0.179	0.457	0.46	0.0173	-0.212	0.248	0.0679	5.75	0.346	0.729	-0.156	0.342	-0.111	0.532
217787_s_at	2590	GALNT2	-0.148	0.00356	-0.0943	0.0905	-0.0227	0.658	0.0246	0.617	-0.0578	0.326	0.00485	0.931	0.0209	0.691	-0.0712	0.178	0.0177	0.766	-0.0514	0.309	-0.0214	4.07	-0.406	0.685	1	0.0871	0.23	0.126	0.0314	-0.0422	0.445	0.0508	4.07	0.858	0.391	0.0043	0.931	-0.0334	0.532
239143_x_at	51444	RNF138	0.176	0.00377	-0.0998	0.133	0.0743	0.225	-0.028	0.633	0.035	0.619	0.0297	0.659	0.00659	0.917	0.00119	0.985	0.000447	0.995	0.048	0.426	-0.0159	3.74	-0.252	0.801	0.976	0.0576	0.506	-0.127	0.0682	-0.0394	0.551	-0.0682	3.74	-0.965	0.335	-0.126	0.0333	0.0397	0.534
218641_at	65998	C11orf95	0.39	0.00321	-0.154	0.289	0.111	0.404	0.0445	0.728	0.13	0.396	0.013	0.929	-0.143	0.298	0.0865	0.529	0.178	0.248	0.0624	0.636	0.0341	6.83	0.249	0.804	1	0.173	0.36	-0.0282	0.853	-0.0819	0.569	0.0446	6.83	0.289	0.772	-0.0836	0.516	-0.0864	0.535
212685_s_at	26608	TBL2	0.178	0.00627	-0.0989	0.167	0.0779	0.236	-0.0666	0.292	-0.0223	0.768	-0.0452	0.532	0.0122	0.857	0.0305	0.653	0.0352	0.644	0.0781	0.229	-0.006	5.98	-0.0888	0.929	1	0.126	0.176	-0.0172	0.819	0.00933	0.896	-0.0878	5.98	-1.16	0.248	-0.114	0.0737	0.0425	0.536
218517_at	79960	PHF17	0.323	0.00101	-0.03	0.78	0.248	0.0124	0.1	0.292	0.0264	0.816	0.0258	0.812	0.0269	0.791	0.0429	0.674	0.0819	0.475	0.0572	0.558	-0.0594	7.29	-0.584	0.559	1	-0.0767	0.584	-0.0828	0.462	0.0339	0.751	0.0405	7.29	0.354	0.723	0.185	0.0529	0.0637	0.538
230676_s_at	55266	TMEM19	-0.173	0.00688	-0.11	0.118	-0.00454	0.944	-0.0609	0.325	-0.0975	0.188	0.0108	0.879	0.0225	0.734	0.103	0.121	0.059	0.429	0.139	0.0294	0.039	4.96	0.589	0.556	0.934	0.0171	0.851	0.0486	0.508	0.077	0.269	0.106	4.96	1.42	0.155	0.0477	0.444	0.0413	0.539
203880_at	10063	COX17	0.425	0.00709	0.0568	0.743	0.329	0.0396	0.123	0.424	0.0771	0.674	0.196	0.265	0.23	0.161	0.0306	0.853	0.246	0.182	0.173	0.271	0.0453	7.53	0.276	0.783	1	-0.0106	0.963	-0.134	0.46	-0.0324	0.851	-0.0115	7.53	-0.0625	0.95	0.0146	0.925	0.102	0.539
218194_at	25996	REXO2	0.386	0.00901	-0.167	0.303	0.389	0.0094	0.2	0.163	0.0866	0.614	0.0912	0.579	0.227	0.139	0.102	0.508	0.143	0.409	0.237	0.109	0.0177	7.66	0.115	0.909	1	-0.152	0.472	0.138	0.416	-0.149	0.354	-0.183	7.66	-1.06	0.289	-0.0918	0.525	0.0956	0.54
222668_at	79047	KCTD15	0.347	0.0034	-0.0205	0.874	0.0652	0.585	0.0192	0.867	0.117	0.396	0.0445	0.735	0.147	0.231	0.147	0.233	0.0189	0.891	-0.0727	0.538	0.00851	6.15	0.0693	0.945	0.989	0.248	0.144	0.0179	0.895	-0.109	0.4	-0.198	6.15	-1.43	0.152	-0.139	0.231	0.0762	0.542
222006_at	3954	LETM1	0.357	0.00117	-0.237	0.0494	0.328	0.00314	0.0421	0.692	-0.0821	0.519	-0.00132	0.991	0.172	0.132	0.112	0.328	-0.0081	0.95	0.202	0.0649	-0.0291	6.86	-0.256	0.798	1	-0.0133	0.932	-0.0953	0.45	-0.141	0.24	-0.0523	6.86	-0.409	0.683	-0.0306	0.775	0.0706	0.542
201773_at	23394	ADNP	0.446	0.00543	-0.0976	0.579	0.173	0.286	-0.0706	0.649	0.211	0.257	-0.156	0.381	0.346	0.0377	0.0797	0.633	0.355	0.0581	0.209	0.19	-0.0207	7.26	-0.125	0.901	1	-0.026	0.91	0.0851	0.644	-0.12	0.49	-0.227	7.26	-1.22	0.225	-0.489	0.00181	-0.103	0.543
211277_x_at	351	APP	-0.243	0.0086	0.0184	0.856	0.153	0.102	0.0458	0.609	-0.0895	0.405	0.0627	0.542	0.055	0.567	-0.0056	0.954	0.216	0.0456	0.0031	0.973	-0.157	6.98	-1.64	0.102	1	0.122	0.355	0.084	0.429	0.0314	0.756	0.0715	6.98	0.664	0.507	-0.0211	0.815	-0.0592	0.544
220761_s_at	51347	TAOK3	0.452	0.00242	-0.0911	0.577	0.221	0.143	-0.0566	0.695	0.139	0.421	0.18	0.276	0.00748	0.961	0.0308	0.843	0.287	0.0992	-0.0977	0.51	-0.0651	6.18	-0.421	0.674	1	0.0977	0.647	0.0478	0.78	0.0762	0.639	-0.106	6.18	-0.609	0.543	-0.229	0.116	-0.0945	0.547
200699_at	11014	KDELR2	0.297	0.00809	-0.138	0.261	0.295	0.00937	0.186	0.0876	0.174	0.181	0.0507	0.684	0.14	0.23	0.104	0.375	0.0978	0.456	0.214	0.0562	-0.00338	7.75	-0.029	0.977	1	-0.176	0.274	0.0623	0.629	-0.163	0.182	-0.168	7.75	-1.28	0.2	-0.0659	0.547	0.0694	0.558
216457_s_at	10291	SF3A1	0.27	0.00559	-0.099	0.355	0.181	0.0658	0.0915	0.334	0.0577	0.611	-0.0855	0.43	0.0424	0.675	0.106	0.297	0.203	0.0754	0.0911	0.349	0.068	7.1	0.671	0.502	1	-0.0209	0.881	0.141	0.208	-0.0799	0.453	0.0956	7.1	0.841	0.401	-0.0922	0.333	-0.0596	0.562
222237_s_at	7771	ZFP112	0.152	0.00645	-0.108	0.0769	0.16	0.00463	0.097	0.0734	-0.00222	0.973	-0.0482	0.437	0.102	0.0771	0.0393	0.499	0.0171	0.793	0.114	0.0404	-0.0076	4.17	-0.131	0.896	1	0.0437	0.584	-0.0782	0.223	0.0109	0.858	0.0524	4.17	0.805	0.421	-0.0237	0.664	0.0339	0.565
239522_at	3594	IL12RB1	-0.228	0.00326	0.0103	0.903	0.17	0.0301	0.0622	0.408	-0.0213	0.813	0.0592	0.493	-0.131	0.103	0.117	0.148	-0.0547	0.546	0.199	0.0102	0.00694	7.04	0.0862	0.931	0.986	-0.0873	0.432	0.0767	0.39	0.0684	0.419	0.186	7.04	2.06	0.0397	0.132	0.0814	-0.0468	0.568
201680_x_at	51593	SRRT	0.279	0.00539	0.0367	0.739	0.251	0.0132	0.0823	0.397	0.193	0.0971	0.103	0.356	0.0659	0.526	0.0879	0.399	0.12	0.305	0.0875	0.381	-0.0217	8.07	-0.208	0.835	1	0.0928	0.517	-0.109	0.343	0.0385	0.724	-0.00035	8.07	-0.003	0.998	0.0416	0.67	0.0601	0.569
201681_s_at	9231	DLG5	0.364	0.00395	-0.246	0.076	0.285	0.0255	0.222	0.0708	0.263	0.0732	0.0229	0.87	0.107	0.413	0.144	0.273	0.204	0.166	0.196	0.119	0.0137	6.15	0.104	0.917	1	0.0268	0.882	0.0962	0.508	-0.0728	0.597	-0.0945	6.15	-0.642	0.521	-0.0191	0.877	0.0754	0.572
230092_at	127733	UBXN10	-0.178	0.00697	0.107	0.141	0.0628	0.347	0.00191	0.976	0.0384	0.616	0.0672	0.36	0.167	0.0151	-0.0205	0.765	-0.0564	0.465	0.122	0.0631	-0.0589	7.01	-0.859	0.391	0.923	-0.037	0.695	-0.0472	0.534	0.0278	0.7	0.0524	7.01	0.68	0.497	0.13	0.0437	-0.0391	0.574
212179_at	25957	PNISR	0.371	0.00503	-0.00976	0.946	0.17	0.203	-0.0792	0.537	0.154	0.316	-0.109	0.457	0.168	0.221	0.189	0.17	0.257	0.0971	0.175	0.185	0.00979	8.16	0.0713	0.943	1	0.0768	0.685	0.0731	0.631	0.0279	0.846	0.0372	8.16	0.241	0.809	-0.241	0.0622	0.0777	0.578
204106_at	7016	TESK1	0.303	0.00443	0.128	0.272	0.221	0.0402	0.0625	0.544	0.223	0.0712	0.0345	0.77	0.0322	0.77	0.0799	0.471	0.171	0.17	-0.0866	0.414	0.0549	6.98	0.497	0.619	1	0.0548	0.719	0.0687	0.574	-0.116	0.318	0.129	6.98	1.04	0.297	0.0485	0.64	-0.0623	0.579
205133_s_at	3336	HSPE1	0.463	0.00422	-0.153	0.39	0.145	0.374	0.0361	0.818	0.158	0.402	-0.091	0.613	0.0901	0.592	0.000838	0.996	0.263	0.165	0.309	0.0556	-0.0671	6.79	-0.399	0.69	1	-0.0582	0.801	0.173	0.353	-0.0586	0.74	-0.18	6.79	-0.951	0.342	-0.152	0.336	-0.0948	0.579
234314_at	57186	RALGAPA2	0.572	0.00449	0.0129	0.953	0.137	0.501	0.0837	0.668	0.25	0.285	-0.0232	0.917	0.265	0.204	0.124	0.553	0.355	0.132	0.0654	0.744	-0.0992	6.41	-0.475	0.635	0.951	0.143	0.62	0.147	0.525	-0.0415	0.85	-0.0708	6.41	-0.302	0.763	-0.169	0.389	0.118	0.579
212313_at	91782	CHMP7	0.302	0.00758	-0.0459	0.711	0.288	0.0117	0.0866	0.429	0.151	0.251	0.1	0.424	0.118	0.315	0.11	0.35	0.0499	0.705	0.126	0.262	-0.109	6.59	-0.933	0.351	1	0.0559	0.73	-0.0406	0.754	-0.0865	0.482	0.0723	6.59	0.549	0.583	0.0621	0.573	0.0655	0.583
210647_x_at	8398	PLA2G6	-0.174	0.0088	0.0511	0.484	0.054	0.422	0.0575	0.373	0.0835	0.28	0.107	0.147	-0.021	0.761	-0.075	0.279	-0.0277	0.722	0.0102	0.877	-0.0056	8.12	-0.0811	0.935	1	0.000571	0.995	0.152	0.047	0.145	0.0466	0.104	8.12	1.34	0.18	0.0347	0.594	-0.0384	0.585
221012_s_at	81603	TRIM8	0.42	0.00303	-0.0379	0.807	0.374	0.009	0.151	0.271	0.177	0.282	-0.0465	0.767	0.097	0.509	0.17	0.25	0.342	0.039	0.189	0.18	-0.112	7.24	-0.765	0.444	1	0.19	0.348	0.0294	0.857	-0.0722	0.64	-0.0807	7.24	-0.489	0.625	-0.0478	0.729	0.0812	0.586
218505_at	79726	WDR59	0.388	0.00189	0.0462	0.735	0.244	0.0532	0.0366	0.762	0.118	0.416	0.194	0.162	0.25	0.0537	0.0668	0.607	0.245	0.093	0.0328	0.792	-0.0131	7.26	-0.101	0.919	1	0.109	0.542	0.168	0.242	0.0642	0.636	-0.0448	7.26	-0.308	0.758	-0.267	0.0283	-0.0714	0.587
227590_at	150383	CDPF1	-0.227	0.00177	-0.0889	0.263	0.0382	0.601	0.134	0.057	-0.00358	0.966	0.0696	0.387	0.0575	0.444	0.125	0.0985	-0.0489	0.564	0.105	0.144	-0.00642	6.28	-0.0854	0.932	0.986	-0.115	0.268	0.0307	0.712	-0.0406	0.607	0.0474	6.28	0.561	0.575	-0.178	0.0117	-0.041	0.592
213485_s_at	89845	ABCC10	0.328	0.00276	-0.0654	0.586	0.108	0.329	0.131	0.217	-0.00657	0.959	-0.0838	0.491	-0.0954	0.401	0.106	0.354	0.0332	0.795	-0.0611	0.576	0.0748	7.51	0.659	0.51	1	0.104	0.508	-0.109	0.386	0.0776	0.515	-0.0333	7.51	-0.261	0.794	-0.0604	0.572	0.0616	0.594
205712_at	5789	PTPRD	-0.473	0.00498	-0.07	0.704	-0.213	0.209	-0.142	0.385	-0.00741	0.97	-0.0337	0.857	0.0272	0.876	-0.0606	0.729	0.268	0.173	0.0412	0.806	-0.0775	6.53	-0.444	0.657	1	-0.0871	0.717	0.492	0.011	-0.038	0.836	0.09	6.53	0.459	0.646	-0.116	0.479	-0.094	0.596
47550_at	11178	LZTS1	0.307	0.00371	-0.0371	0.749	-0.0184	0.863	-0.0799	0.437	-0.00874	0.943	-0.19	0.107	-0.122	0.266	0.0485	0.66	0.145	0.242	-0.122	0.246	-0.062	5.56	-0.564	0.573	1	-0.0281	0.853	-0.241	0.0483	-0.139	0.23	0.11	5.56	0.894	0.372	-0.102	0.324	-0.059	0.598
215434_x_at	55672	NBPF1	-0.541	0.00168	-0.147	0.437	-0.404	0.0204	0.00755	0.964	-0.0307	0.878	0.0428	0.823	0.189	0.289	-0.0485	0.787	-0.0789	0.695	0.172	0.316	0.0721	6.75	0.404	0.686	1	-0.0601	0.807	0.446	0.0242	-0.0314	0.867	0.0807	6.75	0.403	0.687	-0.000852	0.996	-0.0956	0.599
217962_at	55505	NOP10	0.341	0.00997	-0.203	0.162	0.117	0.38	-0.0427	0.739	-0.0952	0.536	0.0262	0.859	0.103	0.453	0.0669	0.628	0.175	0.259	0.147	0.265	-0.101	8.38	-0.732	0.465	1	-0.157	0.406	-0.0992	0.514	-0.267	0.065	-0.179	8.38	-1.16	0.247	-0.124	0.337	-0.0734	0.599
201064_s_at	8761	PABPC4	0.307	0.00475	0.0427	0.72	0.0579	0.598	0.0114	0.914	0.0122	0.923	-0.118	0.33	0.108	0.34	0.0681	0.548	-0.0277	0.827	0.12	0.268	-0.047	7.55	-0.417	0.677	1	-0.0412	0.791	0.0424	0.735	-0.0662	0.577	-0.0289	7.55	-0.228	0.82	-0.202	0.0574	0.0602	0.6
34846_at	816	CAMK2B	-0.157	0.00861	0.0997	0.13	-0.0585	0.334	-0.0283	0.626	0.00146	0.983	0.0545	0.413	-0.0831	0.182	-0.0365	0.558	-0.034	0.627	0.0426	0.475	-0.0648	7.38	-1.04	0.298	1	0.0382	0.656	-0.0837	0.224	0.086	0.188	0.0712	7.38	1.02	0.309	0.0991	0.0903	-0.0332	0.6
228283_at	152100	CMC1	0.398	0.00541	-0.092	0.558	0.117	0.419	0.0478	0.73	-0.0108	0.948	-0.284	0.0745	0.00647	0.965	0.142	0.342	0.214	0.2	-0.0516	0.718	-0.201	4.4	-1.35	0.176	0.923	0.158	0.441	-0.222	0.178	-0.194	0.214	-0.206	4.4	-1.23	0.218	-0.201	0.15	0.0784	0.604
213794_s_at	25983	NGDN	0.272	0.0057	-0.0886	0.412	0.135	0.174	-0.113	0.235	0.0509	0.656	-0.0812	0.458	0.253	0.0136	0.118	0.248	0.193	0.093	-0.0158	0.872	-0.0524	7.28	-0.513	0.608	1	-0.0431	0.759	-0.00988	0.93	-0.106	0.322	-0.138	7.28	-1.2	0.231	-0.289	0.00268	0.0536	0.605
56919_at	57599	WDR48	0.154	0.00322	0.0308	0.59	0.0894	0.0896	0.0494	0.328	0.104	0.085	-0.0109	0.85	-0.0149	0.783	0.0749	0.168	0.0169	0.781	0.108	0.0378	0.00228	7.2	0.0421	0.966	1	0.0273	0.714	-0.0375	0.531	0.0281	0.621	-0.0331	7.2	-0.545	0.586	-0.0134	0.793	0.0284	0.606
208683_at	824	CAPN2	0.374	0.00227	-0.0208	0.877	0.276	0.0256	0.275	0.0209	0.249	0.0802	0.169	0.213	0.263	0.0383	0.179	0.161	0.231	0.107	0.172	0.158	0.0502	9.24	0.395	0.693	1	-0.0482	0.783	0.218	0.121	0.0126	0.925	-0.252	9.24	-1.76	0.0784	-0.0467	0.695	0.0664	0.607
201997_s_at	23013	SPEN	0.279	0.00922	-0.108	0.357	0.263	0.0153	0.0292	0.778	0.146	0.241	0.00187	0.987	0.131	0.237	0.141	0.205	0.229	0.0679	0.162	0.129	-0.0233	8.13	-0.21	0.834	1	0.132	0.389	-0.0283	0.818	-0.107	0.361	-0.0704	8.13	-0.564	0.573	-0.0918	0.379	0.0578	0.609
210148_at	10114	HIPK3	-0.255	0.0028	-0.177	0.0581	-0.178	0.0389	0.0233	0.777	0.0299	0.762	-0.11	0.245	-0.00792	0.929	-0.0623	0.483	-0.0447	0.654	0.0365	0.667	0.0518	4.36	0.586	0.558	1	0.0664	0.586	0.129	0.188	-0.052	0.576	-0.0496	4.36	-0.499	0.618	0.0447	0.591	0.0459	0.61
203560_at	8836	GGH	0.226	0.00923	0.07	0.463	0.000508	0.995	-0.0606	0.472	0.145	0.15	-0.0986	0.307	0.0265	0.768	0.0441	0.626	0.145	0.153	0.0532	0.538	0.108	4.43	1.2	0.231	1	0.052	0.675	-0.109	0.273	0.104	0.274	-0.0566	4.43	-0.559	0.576	0.0142	0.867	0.0464	0.613
201055_s_at	10949	HNRNPA0	-0.276	0.00932	0.105	0.366	-0.0596	0.578	0.0419	0.684	0.113	0.357	0.0577	0.624	0.0447	0.684	0.0745	0.5	-0.104	0.401	0.27	0.0108	-0.198	6.2	-1.8	0.0723	1	-0.018	0.906	0.118	0.334	0.0292	0.8	0.167	6.2	1.35	0.176	0.241	0.02	-0.0566	0.613
224715_at	89891	WDR34	0.223	0.00969	0.0276	0.771	0.28	0.00136	0.21	0.0123	0.117	0.242	0.236	0.0143	0.051	0.569	0.157	0.0808	0.0771	0.445	0.0334	0.698	-0.00887	6.27	-0.099	0.921	0.986	0.0568	0.646	-0.0771	0.437	-0.0191	0.839	0.027	6.27	0.269	0.788	-0.0368	0.662	0.046	0.614
218830_at	51121	RPL26L1	0.42	0.000923	-0.00689	0.96	0.171	0.18	-0.05	0.684	0.0484	0.742	0.0872	0.535	0.16	0.222	0.0633	0.631	0.238	0.108	0.0694	0.582	-0.0719	6.75	-0.547	0.584	1	-0.0556	0.759	0.0447	0.759	-0.0342	0.804	-0.183	6.75	-1.24	0.215	-0.122	0.324	0.0668	0.617
213776_at	157562	LOC157562	0.4	2.12e-05	0.0645	0.531	0.0836	0.377	0.0867	0.34	0.205	0.0597	0.0442	0.671	0.0704	0.469	0.124	0.204	0.182	0.0964	0.162	0.0832	0.129	7.81	1.32	0.186	1	-0.118	0.381	0.12	0.264	0.224	0.0286	-0.0659	7.81	-0.603	0.547	-0.123	0.179	0.0494	0.618
209289_at	4781	NFIB	0.548	0.000647	-0.179	0.309	0.283	0.0807	0.185	0.236	0.225	0.228	0.0111	0.95	0.168	0.313	0.121	0.469	0.286	0.127	-0.0239	0.881	0.0353	8.22	0.212	0.832	1	-0.0615	0.789	0.432	0.0194	0.0335	0.848	-0.0277	8.22	-0.148	0.882	-0.136	0.386	0.0843	0.619
205119_s_at	2357	FPR1	-0.531	0.00611	-0.344	0.105	-0.375	0.0553	-0.212	0.258	-0.437	0.0522	-0.235	0.274	-0.318	0.114	-0.391	0.0527	-0.155	0.492	-0.0468	0.808	-0.0325	6.7	-0.162	0.871	1	-0.439	0.113	-0.189	0.396	-0.455	0.0314	-0.282	6.7	-1.25	0.211	0.0634	0.737	-0.101	0.619
201218_at	1488	CTBP2	0.459	0.00273	-0.341	0.043	0.166	0.285	0.0999	0.501	0.145	0.414	-0.182	0.285	0.0829	0.602	0.188	0.24	0.278	0.121	0.185	0.227	0.0779	6.28	0.49	0.625	1	-0.111	0.613	0.175	0.319	-0.126	0.451	-0.213	6.28	-1.19	0.235	-0.349	0.0197	0.0798	0.622
235631_at	4921	DDR2	-0.268	0.00244	-0.0308	0.751	-0.0741	0.407	0.156	0.0701	0.108	0.291	-0.0301	0.759	-0.0206	0.823	0.0586	0.525	-0.0719	0.487	0.122	0.166	0.0672	6.33	0.732	0.464	0.923	0.0679	0.592	0.0767	0.451	-0.0483	0.617	0.024	6.33	0.232	0.816	0.136	0.117	-0.0458	0.624
202544_at	2764	GMFB	0.29	0.00442	-0.175	0.117	0.0907	0.377	0.016	0.871	0.0266	0.822	-0.106	0.349	0.0954	0.366	0.0523	0.621	0.161	0.177	0.124	0.221	0.0166	9.8	0.158	0.875	1	0.0374	0.797	0.168	0.152	-0.0743	0.503	-0.241	9.8	-2.03	0.0429	-0.158	0.112	-0.0519	0.628
238821_at	1478	CSTF2	0.138	0.00512	0.0491	0.363	0.0581	0.242	0.0319	0.503	-0.0423	0.459	-0.0318	0.56	-0.0337	0.508	0.000122	0.998	-0.0281	0.625	-0.0359	0.464	0.104	3.85	2.03	0.0425	0.923	0.0216	0.759	-0.0986	0.0813	0.00382	0.943	-0.0342	3.85	-0.597	0.551	0.0595	0.215	0.0251	0.629
214668_at	57213	SPRYD7	-0.177	0.00738	0.0359	0.621	-0.102	0.129	-0.0671	0.296	-0.0423	0.582	-0.0764	0.299	-0.117	0.088	-0.0795	0.249	-0.0921	0.234	0.0486	0.461	0.0366	4.89	0.533	0.594	1	0.0441	0.642	0.0457	0.548	0.0401	0.579	0.0525	4.89	0.681	0.496	0.0221	0.732	-0.0335	0.631
218153_at	79587	CARS2	0.241	0.00727	-0.0078	0.937	0.152	0.0942	-0.0154	0.86	0.176	0.092	0.0645	0.518	0.17	0.0688	-0.00305	0.974	0.0682	0.515	-0.00626	0.944	-0.00428	6.57	-0.046	0.963	1	0.0205	0.873	-0.0396	0.701	-0.0302	0.758	0.0912	6.57	0.872	0.384	0.0656	0.454	0.0452	0.633
242887_at	56888	KCMF1	0.146	0.006	-0.101	0.0816	0.0297	0.58	0.0123	0.811	0.0298	0.628	-0.0255	0.666	-0.00906	0.869	0.0457	0.408	0.139	0.0249	0.0344	0.516	-0.00369	3.59	-0.067	0.947	0.99	0.151	0.0472	-0.0531	0.384	-0.0447	0.439	-0.0861	3.59	-1.39	0.165	0.000134	0.998	-0.0266	0.634
217687_at	108	ADCY2	-0.389	0.00187	-0.0534	0.697	-0.199	0.115	0.174	0.15	0.0201	0.89	-0.00836	0.952	-0.246	0.0575	-0.0452	0.728	-0.0113	0.938	0.0594	0.633	0.129	5.89	0.995	0.32	1	0.139	0.437	0.308	0.0324	0.0295	0.828	0.0365	5.89	0.25	0.803	0.184	0.132	0.0626	0.635
212002_at	26099	SZRD1	-0.289	0.00189	0.0503	0.621	-0.0831	0.375	-0.0127	0.888	-0.0272	0.801	0.115	0.264	-0.0546	0.571	0.0207	0.83	-0.109	0.315	-0.0572	0.536	-0.0476	7.92	-0.494	0.621	1	0.0272	0.838	0.154	0.149	0.052	0.607	0.117	7.92	1.08	0.281	0.0773	0.393	0.0464	0.636
218350_s_at	51053	GMNN	0.456	0.00578	-0.179	0.324	0.00506	0.976	0.154	0.335	-0.0448	0.815	-0.0367	0.841	-0.125	0.465	0.0897	0.602	-0.0728	0.706	-0.0135	0.935	-0.194	5.45	-1.13	0.258	1	-0.0353	0.881	0.0634	0.738	0.0147	0.935	-0.218	5.45	-1.13	0.257	-0.0797	0.621	-0.0817	0.639
209815_at	5727	PTCH1	0.534	0.000934	0.0916	0.604	0.186	0.254	0.263	0.0931	0.0738	0.693	-0.0851	0.634	0.0888	0.595	0.342	0.0418	0.087	0.644	0.21	0.191	0.083	6.17	0.497	0.62	1	0.0415	0.857	0.274	0.139	0.146	0.407	-0.0276	6.17	-0.147	0.883	-0.156	0.321	0.0794	0.641
208089_s_at	81550	TDRD3	0.142	0.00374	0.05	0.351	0.0915	0.0642	-0.0161	0.735	0.048	0.398	0.0678	0.213	-0.00973	0.848	0.0817	0.109	0.00132	0.982	-0.0735	0.132	0.0154	4.19	0.304	0.762	1	-0.0138	0.844	0.0209	0.71	0.0349	0.512	-0.0318	4.19	-0.557	0.578	0.0996	0.0371	0.0241	0.641
218809_at	80025	PANK2	0.392	0.00404	-0.00577	0.969	0.135	0.325	0.0575	0.663	0.0289	0.855	-0.0113	0.94	0.0629	0.656	-0.0198	0.889	0.0834	0.6	0.118	0.383	-0.0359	7.18	-0.254	0.8	1	0.052	0.79	-0.0683	0.663	-0.0496	0.738	0.139	7.18	0.873	0.383	-0.123	0.354	0.0662	0.645
202408_s_at	26121	PRPF31	0.34	0.00404	-0.0455	0.726	0.246	0.0395	0.003	0.979	0.133	0.334	0.114	0.386	0.2	0.104	0.0637	0.605	0.0298	0.829	0.212	0.0717	-0.000948	6.53	-0.00772	0.994	1	-0.122	0.471	-0.114	0.402	0.0259	0.841	0.0723	6.53	0.524	0.6	-0.0552	0.633	-0.0574	0.645
214281_s_at	25898	RCHY1	0.374	0.00614	-0.142	0.343	0.254	0.0651	0.206	0.119	0.199	0.21	-0.00792	0.958	0.255	0.0718	0.263	0.0641	0.436	0.00639	0.367	0.00706	0.0709	6.45	0.501	0.617	1	0.113	0.564	0.182	0.247	0.035	0.814	0.0581	6.45	0.365	0.715	0.0495	0.71	0.0648	0.653
201934_at	80335	WDR82	0.31	0.00835	-0.0299	0.816	0.093	0.433	-0.0857	0.452	0.113	0.408	0.0266	0.838	-0.0512	0.674	-0.00165	0.989	0.123	0.371	-0.023	0.844	0.00147	8.84	0.012	0.99	1	0.0381	0.821	-0.105	0.435	-0.242	0.0592	-0.169	8.84	-1.23	0.217	-0.215	0.0612	-0.0557	0.653
210513_s_at	7422	VEGFA	-0.322	0.00283	-0.357	0.00256	-0.204	0.0604	-0.117	0.261	-0.211	0.092	-0.245	0.0411	-0.0939	0.4	-0.105	0.35	-0.118	0.349	-0.215	0.045	-0.0991	6.91	-0.887	0.375	1	-0.204	0.185	0.0261	0.833	-0.296	0.0118	-0.00174	6.91	-0.0139	0.989	-0.00729	0.945	-0.051	0.654
213331_s_at	4750	NEK1	0.404	0.00238	-0.166	0.255	0.149	0.267	0.121	0.346	0.0148	0.924	-0.112	0.447	0.109	0.427	0.0786	0.57	0.178	0.252	0.204	0.124	-0.0762	5.79	-0.553	0.581	1	-0.00766	0.968	0.127	0.406	-0.0947	0.513	-0.148	5.79	-0.954	0.34	-0.13	0.314	0.0628	0.654
203102_s_at	4247	MGAT2	0.276	0.00749	-0.134	0.236	0.0875	0.401	0.0486	0.627	-0.0023	0.985	-0.193	0.0928	0.0741	0.489	0.109	0.312	0.09	0.456	0.0643	0.532	-0.0136	5.78	-0.127	0.899	1	0.219	0.138	-0.0927	0.434	-0.128	0.254	-0.18	5.78	-1.5	0.135	-0.231	0.0221	0.0485	0.656
204380_s_at	2261	FGFR3	-0.446	0.00821	-0.000999	0.996	-0.045	0.792	-0.0737	0.652	0.132	0.5	0.132	0.482	0.012	0.945	-0.0736	0.675	-0.07	0.723	-0.168	0.318	0.0275	5.37	0.157	0.875	1	0.195	0.419	0.314	0.106	0.0508	0.783	-0.168	5.37	-0.852	0.394	0.15	0.362	-0.0792	0.656
226679_at	284129	SLC26A11	0.328	0.00663	-0.000263	0.998	0.238	0.051	0.000931	0.994	0.187	0.184	0.165	0.22	0.1	0.425	0.169	0.179	0.163	0.247	-0.0387	0.748	-0.142	8.21	-1.13	0.258	0.923	-0.105	0.544	-0.121	0.384	0.0499	0.704	-0.0257	8.21	-0.182	0.855	-0.312	0.00833	-0.0564	0.658
241598_at	170685	NUDT10	-0.243	0.000625	0.0857	0.271	-0.151	0.0348	0.0477	0.488	-0.139	0.0908	0.131	0.0958	-0.0778	0.291	0.0327	0.658	-0.177	0.0334	-0.0106	0.881	0.0617	5.08	0.838	0.402	0.923	-0.0534	0.599	0.0299	0.714	0.14	0.0702	0.0499	5.08	0.603	0.547	-0.0155	0.823	-0.0329	0.661
212771_at	221061	FAM171A1	0.323	0.00642	0.211	0.106	0.257	0.0319	0.0544	0.636	0.118	0.39	0.0634	0.63	0.395	0.00138	0.0827	0.503	0.307	0.027	0.123	0.297	-0.0819	9.4	-0.666	0.506	1	0.0742	0.661	0.164	0.229	0.215	0.0959	-0.0204	9.4	-0.147	0.883	0.00338	0.977	0.0543	0.664
242323_at	81579	PLA2G12A	0.405	0.00149	0.11	0.432	0.18	0.162	0.214	0.0828	0.208	0.159	0.092	0.516	0.208	0.115	-0.0304	0.819	0.128	0.389	0.038	0.764	-0.0619	7.5	-0.469	0.64	0.951	-0.0767	0.674	0.0294	0.841	0.00883	0.949	-0.0955	7.5	-0.643	0.521	-0.178	0.152	0.0579	0.666
203386_at	9882	TBC1D4	0.29	0.00733	0.058	0.625	0.26	0.0173	0.155	0.139	-0.0715	0.569	-0.112	0.352	0.178	0.113	0.118	0.295	0.111	0.381	0.117	0.277	0.0691	6.79	0.616	0.538	1	-0.0444	0.774	-0.086	0.489	0.0787	0.504	0.0643	6.79	0.51	0.61	-0.0221	0.834	0.0486	0.67
216321_s_at	2908	NR3C1	0.552	0.00475	-0.0453	0.833	0.35	0.0763	0.00451	0.981	0.114	0.616	-0.235	0.28	0.113	0.577	0.347	0.0886	0.361	0.114	-0.0434	0.824	0.0486	7.49	0.239	0.811	1	-0.00675	0.981	0.0584	0.795	-0.13	0.542	-0.208	7.49	-0.911	0.363	-0.38	0.0468	0.0879	0.67
238049_at	65983	GRAMD3	0.36	0.0073	0.102	0.488	0.294	0.0306	0.367	0.00498	0.339	0.0299	0.0735	0.622	0.388	0.00551	0.271	0.053	0.238	0.129	0.173	0.196	0.22	5.76	1.58	0.115	0.923	0.273	0.155	0.358	0.0207	-0.0362	0.805	-0.208	5.76	-1.33	0.185	-0.0436	0.739	0.0602	0.671
221752_at	54434	SSH1	0.283	0.00329	0.0497	0.637	0.0374	0.7	-0.0198	0.832	0.0812	0.467	0.0635	0.552	-0.0494	0.621	0.138	0.17	0.203	0.071	0.132	0.17	0.0712	7.3	0.713	0.476	1	0.133	0.333	0.0133	0.904	0.0778	0.458	-0.00157	7.3	-0.014	0.989	-0.159	0.0904	0.043	0.672
222494_at	1112	FOXN3	0.334	0.00666	0.107	0.425	0.144	0.246	0.218	0.0673	0.211	0.139	0.072	0.598	0.477	0.000197	0.156	0.223	0.308	0.0324	0.0599	0.624	0.12	7.65	0.943	0.346	0.923	0.0136	0.938	-0.139	0.325	0.0191	0.887	-0.204	7.65	-1.42	0.155	0.0282	0.814	0.0547	0.673
222291_at	25854	FAM149A	0.325	0.00788	0.0569	0.671	0.103	0.406	0.175	0.141	0.122	0.392	-0.0955	0.482	0.0261	0.837	0.0387	0.761	0.0918	0.521	-0.0222	0.855	-0.102	5.99	-0.805	0.421	1	0.0953	0.586	0.134	0.341	-0.0195	0.884	0.0528	5.99	0.37	0.711	0.144	0.226	0.0535	0.678
218616_at	57117	INTS12	0.239	0.00828	-0.122	0.22	0.0636	0.485	-0.057	0.515	0.0542	0.605	0.0382	0.703	0.0148	0.874	-0.00735	0.938	0.0292	0.782	0.0495	0.582	-0.0431	6.06	-0.46	0.646	1	0.00551	0.966	0.157	0.132	-0.021	0.831	-0.0489	6.06	-0.464	0.642	-0.151	0.0876	-0.0393	0.68
240106_at	79158	GNPTAB	0.249	0.00286	0.179	0.0502	0.156	0.0634	0.0842	0.298	0.0682	0.481	0.0723	0.435	0.0711	0.411	0.1	0.249	0.11	0.259	0.211	0.011	0.0422	6.04	0.488	0.626	0.947	0.0912	0.444	0.0292	0.761	0.187	0.0393	0.133	6.04	1.37	0.171	0.00582	0.943	0.036	0.682
235634_at	29942	PURG	0.326	0.000427	0.0947	0.349	0.0177	0.849	0.108	0.227	0.218	0.0418	0.0339	0.741	0.0686	0.474	0.191	0.0471	0.132	0.22	-0.0455	0.62	0.0145	8.34	0.152	0.879	0.982	0.0252	0.849	-0.0321	0.762	0.0603	0.549	-0.13	8.34	-1.21	0.226	-0.0863	0.338	0.0398	0.683
218205_s_at	2872	MKNK2	0.589	0.00992	-0.241	0.337	0.572	0.0134	0.292	0.188	0.174	0.512	0.172	0.497	-0.0717	0.762	0.0151	0.949	-0.127	0.634	0.192	0.399	-0.0755	7.83	-0.318	0.75	1	-0.0622	0.849	-0.027	0.918	0.00796	0.975	-0.216	7.83	-0.809	0.419	0.188	0.399	0.0976	0.686
212094_at	23089	PEG10	0.678	0.00849	0.297	0.293	0.245	0.346	0.0444	0.859	0.392	0.19	0.0305	0.915	0.146	0.584	0.139	0.605	0.374	0.214	0.342	0.183	-0.0765	8.51	-0.286	0.775	1	0.00907	0.98	0.223	0.451	0.0668	0.812	-0.000133	8.51	-0.000441	1	-0.372	0.139	-0.109	0.688
218708_at	29107	NXT1	0.194	0.00184	-0.0451	0.509	0.0511	0.416	0.0841	0.164	0.0621	0.39	0.108	0.12	0.00234	0.971	0.0426	0.511	-0.00974	0.894	-0.00336	0.957	-0.0263	7.13	-0.407	0.684	1	-0.00342	0.969	-0.0637	0.373	-0.0136	0.841	0.0921	7.13	1.27	0.205	0.106	0.0807	-0.0259	0.693
241986_at	168667	BMPER	0.222	0.00129	-0.0046	0.951	-0.0596	0.392	-0.0365	0.585	0.0442	0.581	-0.0777	0.31	-0.0123	0.863	0.0914	0.203	-0.026	0.747	0.0167	0.808	0.0153	4.27	0.213	0.831	0.977	-0.0459	0.641	-0.12	0.129	-0.0428	0.569	-0.0127	4.27	-0.158	0.875	-0.151	0.025	-0.0287	0.694
227586_at	124491	TMEM170A	0.391	0.00655	-0.148	0.35	0.088	0.545	0.181	0.196	0.284	0.0891	-0.259	0.106	0.44	0.00328	0.168	0.262	0.219	0.194	0.0917	0.522	-0.0202	6.94	-0.135	0.892	0.983	0.061	0.767	0.00439	0.979	-0.245	0.118	-0.368	6.94	-2.19	0.0286	-0.276	0.0495	0.0578	0.704
226690_at	117	ADCYAP1R1	0.311	0.00962	0.015	0.91	0.194	0.11	0.269	0.021	0.226	0.105	0.107	0.423	0.447	0.000363	0.257	0.0406	0.156	0.267	0.257	0.0324	0.0298	8.92	0.239	0.811	0.977	0.101	0.558	0.209	0.131	0.0241	0.854	-0.134	8.92	-0.955	0.34	0.0843	0.472	0.0479	0.706
32099_at	9667	SAFB2	0.45	0.00315	-0.102	0.54	0.491	0.00144	0.216	0.143	0.241	0.172	0.0253	0.881	0.232	0.142	0.166	0.294	0.31	0.0811	0.183	0.227	0.119	7.7	0.755	0.451	1	-0.0555	0.799	-0.0237	0.892	-0.000579	0.997	0.175	7.7	0.987	0.324	-0.0187	0.9	0.0601	0.708
209944_at	57862	ZNF410	0.382	0.00498	-0.222	0.137	0.2	0.146	0.102	0.438	0.0188	0.905	-0.144	0.341	0.168	0.235	0.0596	0.674	0.126	0.427	0.109	0.421	-0.112	7.34	-0.793	0.428	1	0.0627	0.747	-0.0804	0.607	-0.164	0.268	-0.275	7.34	-1.73	0.0836	-0.234	0.0776	0.0534	0.71
226810_at	79627	OGFRL1	0.484	0.00763	0.0169	0.932	0.144	0.432	0.0776	0.659	0.583	0.00576	-0.205	0.31	0.782	3.69e-05	0.22	0.244	0.409	0.0541	0.17	0.347	0.0511	9.03	0.271	0.786	0.972	0.375	0.149	0.0636	0.76	-0.00837	0.966	-0.488	9.03	-2.31	0.0214	-0.286	0.107	0.0712	0.71
203440_at	1000	CDH2	0.286	0.00406	-0.177	0.105	0.164	0.102	0.0419	0.664	0.15	0.192	-0.077	0.485	0.00603	0.953	0.00135	0.99	0.23	0.0482	0.0126	0.899	-0.014	8.86	-0.136	0.892	1	0.125	0.379	0.0419	0.713	-0.176	0.104	-0.0093	8.86	-0.0803	0.936	-0.0666	0.492	0.0389	0.711
234464_s_at	146956	EME1	0.286	0.00154	-0.238	0.0164	0.033	0.717	0.0372	0.67	-0.0254	0.808	0.122	0.223	0.024	0.797	0.0667	0.477	0.0306	0.771	-0.022	0.806	-0.0847	4.73	-0.906	0.365	0.923	-0.0352	0.785	0.00981	0.924	0.197	0.0446	-0.00913	4.73	-0.0869	0.931	-0.0715	0.415	-0.0352	0.711
224653_at	1979	EIF4EBP2	0.274	0.00625	0.0738	0.501	0.0783	0.439	-0.00486	0.96	0.192	0.0991	0.00109	0.992	0.23	0.0268	0.128	0.221	0.113	0.334	0.194	0.0518	-0.0631	8.09	-0.607	0.544	0.934	-0.0193	0.893	-0.0217	0.851	-0.0873	0.424	-0.213	8.09	-1.82	0.069	0.0414	0.672	-0.0387	0.714
213316_at	57608	KIAA1462	0.36	0.00741	-0.0152	0.918	0.0746	0.582	0.0397	0.76	0.0243	0.876	-0.037	0.804	-0.0219	0.875	0.149	0.287	0.204	0.194	-0.0143	0.915	-0.0916	5.61	-0.657	0.511	1	0.126	0.513	-0.0663	0.668	0.0199	0.892	0.058	5.61	0.37	0.711	-0.112	0.393	0.0518	0.715
208775_at	7514	XPO1	0.469	0.00329	-0.0598	0.732	0.383	0.0176	0.0456	0.768	0.179	0.335	-0.00475	0.979	0.324	0.0508	0.195	0.24	0.408	0.029	0.128	0.422	0.0119	8.61	0.0718	0.943	1	0.0847	0.71	0.238	0.194	-0.0905	0.603	-0.23	8.61	-1.24	0.216	-0.243	0.118	-0.0606	0.719
217907_at	29074	MRPL18	0.313	0.00535	0.0389	0.753	0.0499	0.66	-0.121	0.265	0.0936	0.474	0.171	0.171	0.172	0.141	0.0959	0.413	-0.0156	0.906	0.0951	0.396	0.113	8.14	0.967	0.334	1	-0.1	0.534	0.0668	0.605	-0.0958	0.434	0.112	8.14	0.851	0.395	-0.125	0.254	-0.0412	0.728
202406_s_at	7073	TIAL1	0.397	0.00206	0.0831	0.556	0.39	0.00277	0.0679	0.587	0.133	0.376	0.242	0.0906	0.192	0.151	0.138	0.305	0.148	0.325	0.0688	0.592	0.0433	7.43	0.324	0.746	1	-0.104	0.574	0.0894	0.546	0.198	0.159	-0.0532	7.43	-0.354	0.723	-0.0106	0.933	-0.0471	0.729
202076_at	329	BIRC2	0.359	0.0067	-0.22	0.129	0.273	0.0414	0.112	0.384	0.136	0.376	-0.0489	0.739	0.22	0.11	0.0835	0.545	0.403	0.00935	0.243	0.0654	0.0372	7.08	0.271	0.787	1	-0.0206	0.913	0.18	0.238	-0.0528	0.715	-0.092	7.08	-0.596	0.551	-0.116	0.37	0.0484	0.729
203711_s_at	26275	HIBCH	0.307	0.000105	-0.0172	0.843	0.101	0.204	0.0799	0.296	0.071	0.438	-0.0384	0.661	0.174	0.034	0.173	0.0353	0.0771	0.402	0.168	0.0327	-0.00062	4.66	-0.00759	0.994	1	0.144	0.202	0.155	0.0878	0.0544	0.526	0.082	4.66	0.892	0.373	0.0906	0.239	0.0287	0.73
204091_at	5147	PDE6D	0.234	0.00746	-0.0885	0.357	0.011	0.901	0.00481	0.955	0.078	0.443	-0.0853	0.381	0.0767	0.399	0.147	0.107	-0.0129	0.9	0.041	0.638	-0.142	7.16	-1.57	0.118	1	0.103	0.41	0.278	0.00596	-0.0254	0.79	-0.0445	7.16	-0.435	0.664	-0.178	0.0376	0.0317	0.732
201931_at	2108	ETFA	0.495	0.00131	-0.05	0.767	0.146	0.347	0.0128	0.931	0.132	0.461	-0.13	0.447	0.265	0.0973	0.216	0.177	0.134	0.455	0.0882	0.565	0.0127	6.65	0.0795	0.937	1	-0.0862	0.695	-0.119	0.499	-0.111	0.508	-0.25	6.65	-1.4	0.163	-0.247	0.0999	-0.0553	0.733
218603_at	51696	HECA	0.365	0.00393	-0.015	0.914	0.225	0.0787	0.019	0.877	0.227	0.123	0.0974	0.489	0.209	0.113	0.154	0.244	0.385	0.00948	0.0912	0.47	0.241	7.29	1.83	0.0677	1	-0.0653	0.719	-0.0619	0.67	0.0743	0.59	0.0401	7.29	0.272	0.786	-0.165	0.181	0.0455	0.734
230250_at	5787	PTPRB	0.337	0.00503	0.042	0.75	-0.127	0.297	0.173	0.139	-0.0736	0.598	-0.172	0.199	0.174	0.164	0.144	0.248	-0.0788	0.574	-0.119	0.318	-0.00741	5.25	-0.0595	0.953	0.991	0.0665	0.699	-0.0147	0.915	-0.0114	0.931	-0.244	5.25	-1.74	0.0823	-0.25	0.0333	0.0428	0.736
214040_s_at	2934	GSN	-0.477	0.000434	0.0304	0.838	-0.104	0.445	0.103	0.43	0.0361	0.818	0.136	0.367	0.199	0.157	0.0756	0.592	-0.0688	0.663	0.00132	0.992	-0.057	6.21	-0.406	0.685	1	0.0373	0.847	0.337	0.0303	0.0482	0.744	0.0924	6.21	0.586	0.558	0.104	0.43	0.0482	0.736
228594_at	133686	NADK2	0.444	0.00369	-0.0835	0.619	0.192	0.213	0.185	0.211	0.234	0.188	-0.186	0.273	0.416	0.00885	0.209	0.189	0.356	0.0468	0.127	0.405	-0.0047	8.48	-0.0296	0.976	0.996	0.387	0.0774	-0.0228	0.897	-0.0795	0.633	-0.339	8.48	-1.9	0.0574	-0.077	0.606	0.0543	0.737
214110_s_at	654342	LOC654342	0.426	0.00185	0.0724	0.629	0.208	0.131	0.144	0.279	0.274	0.0843	0.2	0.188	0.0848	0.55	0.0372	0.794	0.188	0.239	0.125	0.36	0.0957	7.2	0.675	0.5	1	0.0782	0.689	-0.0217	0.89	-0.0329	0.825	0.174	7.2	1.09	0.276	-0.0343	0.797	0.0481	0.739
215069_at	9397	NMT2	-0.155	0.00655	0.0633	0.313	-0.0344	0.551	-0.00753	0.892	0.0328	0.621	-0.0701	0.27	-0.0467	0.431	0.0219	0.713	-0.0113	0.866	0.00278	0.961	-0.0284	4.84	-0.479	0.632	1	0.0105	0.897	0.032	0.626	0.0752	0.227	0.0231	4.84	0.347	0.729	0.00808	0.885	0.0199	0.741
225215_s_at	54516	MTRF1L	0.363	0.00245	0.0518	0.693	0.0602	0.619	0.229	0.0487	0.2	0.151	0.0821	0.537	0.354	0.00445	0.0699	0.575	0.16	0.252	-0.172	0.149	0.0388	7.39	0.312	0.755	0.962	-0.0761	0.657	0.126	0.361	0.0732	0.575	-0.14	7.39	-1	0.317	-0.0304	0.795	0.0414	0.743
211328_x_at	3077	HFE	-0.227	0.00835	0.114	0.227	-0.0597	0.491	0.0861	0.302	-0.114	0.255	0.0861	0.368	-0.0804	0.368	0.00072	0.994	-0.117	0.244	0.034	0.691	0.0496	7.09	0.555	0.579	1	-0.00963	0.938	-0.0414	0.675	0.129	0.168	0.0574	7.09	0.573	0.567	0.259	0.00212	-0.0294	0.745
216199_s_at	4216	MAP3K4	0.526	0.0088	-0.165	0.454	0.462	0.0229	-0.0761	0.696	0.115	0.622	-0.0585	0.793	0.0315	0.88	0.154	0.462	0.239	0.309	0.0506	0.8	-0.192	7.56	-0.922	0.357	1	-0.0517	0.857	-0.181	0.434	-0.286	0.191	-0.138	7.56	-0.587	0.557	-0.107	0.584	0.0688	0.746
222770_s_at	60558	GUF1	0.29	0.00663	-0.0666	0.57	-0.0214	0.843	-0.0127	0.903	-0.084	0.498	-0.0328	0.782	0.123	0.268	0.0924	0.406	0.102	0.415	-0.119	0.264	-0.061	4.66	-0.551	0.582	0.938	0.297	0.0525	-0.146	0.236	-0.26	0.0259	-0.121	4.66	-0.971	0.332	-0.172	0.0984	-0.0365	0.746
40225_at	2580	GAK	0.305	0.00142	-0.0119	0.909	0.148	0.125	0.049	0.596	0.0508	0.646	-0.00718	0.946	-0.0395	0.69	0.036	0.717	0.171	0.126	0.0449	0.636	-0.0855	8.56	-0.864	0.388	1	0.0746	0.585	-0.0545	0.619	-0.0379	0.716	0.0699	8.56	0.629	0.529	-0.0871	0.349	0.0325	0.747
221221_s_at	26249	KLHL3	0.302	0.00333	0.119	0.292	0.0911	0.38	-0.0751	0.451	0.00665	0.956	0.0189	0.869	0.109	0.306	0.00825	0.939	0.143	0.235	0.0622	0.543	-0.114	8.28	-1.07	0.284	1	0.0565	0.701	-0.0536	0.65	0.0519	0.643	0.0101	8.28	0.0842	0.933	-0.284	0.0048	-0.0349	0.748
204264_at	1376	CPT2	0.158	0.00789	-0.0483	0.46	0.0783	0.193	0.0612	0.289	0.0975	0.159	-0.0255	0.7	0.0311	0.615	-0.0297	0.632	0.0383	0.582	-0.0376	0.526	-0.0167	4.24	-0.271	0.787	1	-0.0546	0.522	-0.00834	0.903	-0.0291	0.654	-0.0601	4.24	-0.866	0.387	-0.00867	0.881	0.0202	0.748
220865_s_at	23590	PDSS1	0.159	0.00927	-0.0474	0.478	-0.126	0.0407	0.00397	0.946	0.0581	0.412	0.0042	0.951	-0.0489	0.439	-0.0512	0.42	-0.0326	0.647	0.0814	0.18	0.0102	4.96	0.161	0.872	1	0.0421	0.629	-0.0868	0.215	0.0559	0.4	-0.0229	4.96	-0.322	0.747	-0.117	0.0486	0.0206	0.749
220116_at	3781	KCNN2	0.458	0.00106	-0.124	0.419	0.145	0.303	0.113	0.402	0.343	0.0343	0.0196	0.899	0.0757	0.601	0.187	0.198	0.194	0.234	0.272	0.0509	0.101	5.68	0.695	0.488	1	0.112	0.573	-0.0772	0.63	-0.106	0.487	-0.123	5.68	-0.759	0.448	-0.192	0.158	0.0471	0.749
218253_s_at	1939	EIF2D	0.178	0.00481	-0.0125	0.856	-0.0267	0.675	-0.0248	0.685	-0.0291	0.691	0.0548	0.434	0.0285	0.663	0.0624	0.342	-0.0132	0.858	-0.024	0.702	-0.0495	7.73	-0.757	0.449	1	0.075	0.406	0.0955	0.187	0.0727	0.29	0.0307	7.73	0.418	0.676	-0.0372	0.545	0.021	0.752
214046_at	10690	FUT9	0.504	0.00868	-0.0101	0.962	0.168	0.387	-0.0511	0.784	0.382	0.0868	-0.126	0.556	0.0845	0.671	0.179	0.372	0.671	0.00289	-0.0045	0.981	0.0374	8.43	0.188	0.851	1	0.0905	0.742	0.316	0.152	-0.0702	0.737	-0.194	8.43	-0.865	0.387	-0.32	0.0884	-0.0628	0.757
219574_at	55016	2001-03-01	-0.167	0.00343	-0.0236	0.706	-0.0873	0.13	-0.0129	0.816	-0.118	0.074	-0.126	0.0471	0.00689	0.907	-0.104	0.0792	0.0175	0.793	-0.0209	0.713	0.0821	5.35	1.39	0.166	1	-0.024	0.769	0.0451	0.492	-0.00305	0.961	0.0338	5.35	0.508	0.611	-0.0227	0.683	0.0186	0.757
220027_s_at	54922	RASIP1	0.201	0.00977	0.00252	0.976	0.104	0.185	0.0172	0.82	0.0901	0.318	0.135	0.118	-0.00548	0.946	0.088	0.277	-0.0233	0.797	-0.232	0.00277	0.137	7.03	1.7	0.0896	1	-0.0591	0.595	-0.0873	0.328	0.0331	0.696	-0.0319	7.03	-0.353	0.724	0.0233	0.759	-0.0253	0.757
209523_at	6873	TAF2	0.296	0.00846	-0.244	0.0479	0.0647	0.568	0.0408	0.708	-0.031	0.812	-0.232	0.0636	0.00593	0.959	0.0401	0.731	0.155	0.239	-0.0191	0.865	0.012	5.73	0.103	0.918	1	0.115	0.474	-0.0448	0.728	-0.147	0.229	-0.243	5.73	-1.85	0.0643	-0.301	0.00606	0.0365	0.758
204276_at	7084	TK2	0.211	0.00589	-0.0668	0.427	0.123	0.113	0.125	0.0931	-0.0171	0.848	0.00364	0.966	0.111	0.164	0.0352	0.659	-0.054	0.547	0.0879	0.25	-0.11	6.47	-1.39	0.166	1	0.0649	0.554	-0.104	0.238	-0.121	0.147	-0.0533	6.47	-0.596	0.551	-0.0916	0.221	0.0249	0.759
212542_s_at	55023	PHIP	0.324	0.00752	-0.237	0.0745	0.322	0.0085	0.0679	0.563	0.00419	0.976	-0.000785	0.995	0.0609	0.628	0.0661	0.6	0.06	0.671	-0.0127	0.916	-0.0731	7.77	-0.582	0.561	1	-0.122	0.479	-0.115	0.409	-0.139	0.292	-0.252	7.77	-1.79	0.0741	-0.151	0.202	-0.0392	0.759
234192_s_at	80318	GKAP1	0.374	0.00775	0.0876	0.569	0.358	0.0116	0.248	0.0682	0.182	0.264	0.167	0.284	0.342	0.0189	0.232	0.113	0.279	0.0892	0.00972	0.945	-0.0136	5.29	-0.0934	0.926	0.986	0.0945	0.638	-0.0394	0.807	0.116	0.449	-0.267	5.29	-1.63	0.103	-0.214	0.117	0.0451	0.761
212534_at	7572	ZNF24	0.29	0.00856	-0.16	0.187	0.276	0.0134	0.153	0.153	0.0829	0.517	0.039	0.75	0.311	0.00669	0.23	0.0457	0.0746	0.562	0.141	0.2	-0.0907	8.58	-0.793	0.428	1	-0.0308	0.845	0.12	0.342	-0.00413	0.973	-0.202	8.58	-1.57	0.116	-0.0878	0.414	-0.0354	0.761
221571_at	7187	TRAF3	0.384	0.00419	-0.0482	0.743	0.0825	0.542	-0.0568	0.662	0.159	0.307	-0.025	0.867	0.111	0.425	0.0496	0.722	0.324	0.0393	-0.0745	0.577	-0.0023	6.84	-0.0165	0.987	1	0.14	0.466	-0.202	0.19	-0.00343	0.981	0.0772	6.84	0.494	0.622	-0.153	0.244	-0.0431	0.761
211988_at	6605	SMARCE1	0.339	0.00679	-0.158	0.251	0.249	0.0488	-0.0805	0.508	0.111	0.445	-0.0726	0.602	0.326	0.0122	0.099	0.448	0.0605	0.679	0.11	0.377	-0.00398	7.8	-0.0306	0.976	1	0.179	0.318	0.21	0.144	-0.0801	0.557	-0.229	7.8	-1.57	0.117	-0.296	0.0154	0.0402	0.761
203098_at	9425	CDYL	0.229	0.0059	-0.00287	0.975	0.184	0.0289	-0.04	0.62	0.0267	0.782	0.051	0.581	0.0807	0.349	0.0557	0.52	0.139	0.154	0.127	0.127	0.0397	7.13	0.46	0.645	1	0.0679	0.568	-0.158	0.0974	0.0385	0.671	-0.0284	7.13	-0.293	0.769	-0.0597	0.462	0.0265	0.762
217774_s_at	51504	TRMT112	0.387	0.00497	-0.0926	0.54	0.239	0.0862	-0.0694	0.603	0.0388	0.808	0.0571	0.709	0.12	0.403	-0.0146	0.919	0.268	0.0965	0.157	0.251	-0.0118	8.34	-0.0825	0.934	1	-0.0954	0.628	0.0604	0.703	-0.246	0.102	-0.0865	8.34	-0.539	0.59	-0.204	0.129	-0.0439	0.763
228390_at	27314	RAB30	0.616	0.00352	-0.0511	0.825	0.196	0.357	0.17	0.406	0.211	0.39	-0.192	0.412	0.459	0.0363	0.259	0.239	0.367	0.137	0.00386	0.985	-0.254	6.72	-1.16	0.247	0.923	0.14	0.643	-0.0599	0.805	-0.181	0.433	-0.643	6.72	-2.61	0.00923	-0.251	0.223	0.0668	0.764
202144_s_at	158	ADSL	0.278	0.00478	0.0682	0.527	0.105	0.293	0.00548	0.954	0.00299	0.979	0.0626	0.567	0.101	0.322	0.0567	0.58	0.161	0.161	-0.0481	0.623	-0.0221	7.24	-0.217	0.828	1	0.00783	0.956	-0.133	0.24	0.0402	0.708	0.113	7.24	0.983	0.326	-0.0476	0.62	0.0307	0.768
225123_at	143686	SESN3	0.559	0.00515	0.113	0.606	-0.206	0.308	0.00483	0.98	0.147	0.527	-0.292	0.188	0.187	0.366	0.176	0.397	0.301	0.197	-0.0495	0.804	-0.158	6.66	-0.76	0.448	0.923	0.113	0.693	-0.0766	0.739	-0.166	0.445	-0.492	6.66	-2.11	0.0352	-0.339	0.0821	0.06	0.776
205001_s_at	8653	DDX3Y	-0.221	0.00507	0.15	0.0835	-0.0738	0.354	0.0341	0.656	0.129	0.161	0.0265	0.763	-0.0736	0.369	-0.0414	0.615	-0.0843	0.361	0.017	0.828	0.0824	4.86	1.01	0.315	1	-0.0485	0.667	0.186	0.0409	0.0296	0.731	-0.0608	4.86	-0.661	0.509	0.0359	0.641	-0.0236	0.777
211784_s_at	6426	SRSF1	0.496	0.00259	-0.134	0.458	0.27	0.104	-0.0642	0.687	0.0319	0.867	-0.0611	0.738	0.222	0.193	0.0643	0.707	0.355	0.0653	0.0167	0.919	-0.0467	6.99	-0.273	0.785	1	0.105	0.656	-0.00321	0.986	0.00131	0.994	-0.197	6.99	-1.02	0.306	-0.319	0.0472	0.0492	0.777
217922_at	10905	MAN1A2	0.307	0.00864	0.0283	0.825	0.186	0.115	-0.0368	0.745	0.0718	0.596	-0.0205	0.875	0.0732	0.546	0.11	0.366	0.119	0.384	0.000507	0.997	0.0667	8.45	0.55	0.582	1	-0.0616	0.712	-0.138	0.303	-0.111	0.384	0.00705	8.45	0.0518	0.959	-0.0958	0.4	0.0348	0.778
218583_s_at	54165	DCUN1D1	0.305	0.00501	-0.163	0.171	0.132	0.231	0.0389	0.712	0.12	0.342	-0.141	0.242	0.0616	0.585	0.0532	0.638	0.201	0.114	0.218	0.0444	-0.0702	6.92	-0.623	0.534	1	-0.0478	0.759	-0.0527	0.673	-0.0578	0.625	-0.0585	6.92	-0.462	0.644	-0.179	0.0922	0.0323	0.778
242635_s_at	222236	NAPEPLD	-0.225	0.000297	-0.0948	0.165	0.0858	0.172	-0.0456	0.449	-0.0829	0.251	0.116	0.0926	0.0542	0.4	0.0491	0.448	0.0622	0.392	-0.0559	0.366	0.00804	4.07	0.125	0.901	0.984	0.0511	0.565	0.109	0.126	0.0864	0.202	0.0824	4.07	1.14	0.256	-0.0771	0.203	-0.0183	0.78
215108_x_at	27324	TOX3	0.255	0.00111	-0.0708	0.41	0.0881	0.265	0.0711	0.349	-0.00886	0.922	-0.121	0.165	-0.0781	0.336	-0.0243	0.765	0.0355	0.698	-0.00897	0.908	-0.0922	4.14	-1.14	0.257	1	0.0814	0.467	-0.0126	0.889	-0.0453	0.595	-0.0277	4.14	-0.303	0.762	-0.0822	0.282	-0.023	0.781
35846_at	7067	THRA	0.265	0.00682	0.126	0.24	0.208	0.0357	0.066	0.487	0.257	0.024	0.125	0.251	0.196	0.054	0.131	0.199	0.0951	0.406	0.188	0.0536	-0.0325	7.8	-0.319	0.75	1	-0.0879	0.53	0.224	0.0467	0.0217	0.839	-0.0141	7.8	-0.124	0.902	-0.0331	0.729	0.0282	0.785
226148_at	29068	ZBTB44	0.556	0.00322	-0.0139	0.946	0.23	0.226	0.0786	0.667	0.251	0.251	-0.144	0.491	0.5	0.0107	0.0418	0.831	0.17	0.442	-0.184	0.327	-0.054	7.61	-0.276	0.783	0.971	-0.0481	0.859	-0.113	0.602	0.00351	0.986	-0.513	7.61	-2.34	0.0198	-0.368	0.0459	-0.0542	0.785
201513_at	7247	TSN	0.284	0.00692	0.0317	0.783	0.121	0.254	0.061	0.549	-0.0907	0.457	-0.0202	0.863	0.0867	0.426	0.063	0.565	0.00396	0.974	0.0455	0.664	-0.0452	5.29	-0.415	0.678	1	0.0517	0.731	-0.0527	0.662	-2.95e-05	1	-0.00386	5.29	-0.0315	0.975	-0.11	0.285	-0.0298	0.788
230422_at	2359	FPR3	-0.316	8.16e-05	0.0536	0.541	-0.12	0.136	0.0741	0.339	0.0216	0.816	0.0307	0.73	-0.0899	0.278	0.0781	0.348	-0.12	0.2	-0.0138	0.863	-0.0143	6.69	-0.172	0.863	0.98	-0.114	0.32	-0.0391	0.67	0.0757	0.385	0.0407	6.69	0.436	0.663	0.0841	0.281	0.0226	0.789
208913_at	23062	GGA2	0.197	0.00724	0.0383	0.635	0.152	0.0411	0.0936	0.189	0.0868	0.309	0.0564	0.49	0.0391	0.608	0.14	0.0669	-0.0584	0.497	0.0604	0.409	-0.0393	5.18	-0.516	0.606	1	0.0367	0.727	-0.163	0.0542	-0.149	0.0641	-0.00923	5.18	-0.108	0.914	0.0196	0.785	0.0207	0.79
203897_at	57149	LYRM1	0.4	0.00683	-0.0822	0.612	0.246	0.0991	-0.0279	0.846	0.0642	0.708	-0.0592	0.718	0.163	0.288	0.0477	0.757	0.0301	0.861	0.154	0.295	-0.0195	7.24	-0.127	0.899	1	-0.0793	0.707	-0.0308	0.856	-0.118	0.463	-0.0512	7.24	-0.297	0.766	-0.319	0.027	-0.0414	0.79
225842_at	22822	PHLDA1	0.3	0.00387	-0.00615	0.957	0.0408	0.697	0.172	0.0873	0.0604	0.616	0.00748	0.948	0.217	0.0436	0.157	0.146	0.193	0.112	-0.0656	0.526	-0.107	7.13	-0.994	0.321	0.923	-0.148	0.319	0.02	0.867	0.00448	0.968	-0.0794	7.13	-0.657	0.512	-0.0433	0.669	0.0291	0.791
221656_s_at	55160	ARHGEF10L	0.257	0.00301	0.028	0.768	0.139	0.111	0.00569	0.946	0.029	0.773	0.151	0.116	0.184	0.0405	0.172	0.0558	0.14	0.167	0.235	0.00643	0.00255	6.67	0.0284	0.977	1	0.0812	0.511	-0.244	0.0142	0.0367	0.697	-0.0785	6.67	-0.779	0.437	0.0182	0.829	0.0241	0.792
222182_s_at	4848	CNOT2	0.448	0.0075	-0.276	0.133	0.392	0.0208	0.0341	0.834	0.26	0.182	-0.117	0.53	0.154	0.375	0.0566	0.746	0.00763	0.969	-0.102	0.542	-0.0249	5.72	-0.143	0.886	1	0.0209	0.931	0.0376	0.845	-0.194	0.289	-0.186	5.72	-0.952	0.342	-0.0843	0.606	0.0463	0.793
209429_x_at	8890	EIF2B4	0.256	0.00411	-0.0116	0.906	0.117	0.192	0.0945	0.274	0.134	0.196	-0.012	0.903	0.0588	0.525	0.0616	0.507	0.0924	0.375	0.0703	0.428	-0.112	7.41	-1.21	0.227	1	-0.0619	0.627	0.00277	0.978	0.0233	0.811	0.0737	7.41	0.71	0.478	-0.102	0.243	0.024	0.799
214274_s_at	30	ACAA1	0.446	0.00676	-0.254	0.16	0.291	0.0803	-0.00117	0.994	4.44e-06	1	-0.0223	0.903	0.191	0.264	0.112	0.513	0.0878	0.648	0.156	0.342	-0.237	6.43	-1.39	0.166	1	0.152	0.518	-0.189	0.318	-0.00208	0.991	-0.0274	6.43	-0.143	0.887	-0.181	0.261	-0.0434	0.803
212901_s_at	23283	CSTF2T	-0.275	0.00116	0.0163	0.861	0.0286	0.737	0.086	0.294	0.00339	0.972	-0.0486	0.604	-0.103	0.242	0.042	0.633	0.0655	0.507	0.0436	0.605	-0.178	7.08	-2.04	0.0422	1	0.142	0.242	0.153	0.114	0.047	0.61	0.0759	7.08	0.77	0.441	-0.136	0.0996	-0.0221	0.804
223468_s_at	56963	RGMA	0.308	0.00646	0.0313	0.801	0.242	0.0343	0.138	0.208	0.283	0.0316	-0.0443	0.725	0.282	0.0167	0.0977	0.407	0.261	0.049	0.0777	0.491	-0.0776	7.86	-0.661	0.509	0.93	0.0851	0.599	0.0118	0.928	-0.0239	0.846	-0.0377	7.86	-0.286	0.775	-0.0633	0.566	0.0295	0.805
200798_x_at	4170	MCL1	-0.515	0.0052	-0.522	0.00995	-0.358	0.0545	-0.0878	0.623	-0.262	0.221	-0.347	0.09	0.145	0.449	-0.101	0.597	-0.122	0.572	-0.0211	0.908	-0.00879	5.94	-0.046	0.963	1	-0.198	0.454	0.382	0.0711	-0.487	0.0156	-0.375	5.94	-1.75	0.0813	-0.105	0.56	0.0476	0.807
221570_s_at	29081	METTL5	0.443	0.0042	-0.0265	0.876	0.134	0.389	-0.0368	0.806	0.13	0.468	-0.00633	0.971	0.126	0.431	0.184	0.254	0.313	0.0835	0.0901	0.558	0.00532	6.87	0.0332	0.974	1	-0.0581	0.793	0.0193	0.913	-0.206	0.222	-0.152	6.87	-0.843	0.4	-0.362	0.0166	0.039	0.811
203685_at	596	BCL2	0.327	0.00586	-0.113	0.387	0.248	0.0386	0.277	0.0164	0.0629	0.648	0.0526	0.69	0.0538	0.662	0.167	0.177	0.0131	0.925	0.181	0.126	0.116	6.57	0.941	0.347	1	0.262	0.123	0.168	0.219	0.00887	0.945	-0.156	6.57	-1.13	0.26	0.0842	0.467	0.0298	0.812
203870_at	64854	USP46	0.475	0.0059	-0.0665	0.725	-0.0121	0.945	-0.0249	0.882	0.242	0.227	-0.202	0.292	0.0788	0.66	0.0925	0.607	0.225	0.265	0.081	0.638	0.197	7.1	1.1	0.273	1	0.0339	0.891	0.324	0.103	-0.0746	0.692	-0.217	7.1	-1.08	0.28	-0.316	0.0608	0.0424	0.816
204032_at	8412	BCAR3	0.169	0.0038	0.00388	0.952	-0.00703	0.905	0.0675	0.232	0.035	0.605	-0.0343	0.596	0.0096	0.874	0.0628	0.301	0.00437	0.949	0.0823	0.156	-0.00425	4.75	-0.0703	0.944	1	0.0315	0.705	0.0907	0.176	0.0158	0.803	-0.074	4.75	-1.09	0.276	0.009	0.874	0.0137	0.824
212599_at	26053	AUTS2	0.448	0.00613	0.0639	0.722	0.175	0.29	0.0502	0.752	0.0838	0.659	-0.0127	0.944	0.0975	0.565	-0.00327	0.985	0.127	0.505	0.114	0.483	-0.0333	8.3	-0.196	0.845	1	-0.282	0.228	0.256	0.173	0.0777	0.663	-0.187	8.3	-0.982	0.326	-0.124	0.435	0.0379	0.826
209268_at	11311	VPS45	0.41	0.00899	-0.0862	0.616	0.109	0.49	0.106	0.485	0.204	0.263	-0.165	0.342	-0.017	0.917	0.0814	0.618	0.108	0.556	0.128	0.411	-0.214	7.4	-1.32	0.188	1	0.223	0.321	0.084	0.641	-0.189	0.268	-0.298	7.4	-1.63	0.104	-0.321	0.036	-0.0362	0.827
213029_at	4781	NFIB	0.45	0.000557	-0.0945	0.508	0.182	0.165	0.267	0.0348	0.344	0.0231	0.145	0.314	0.247	0.0673	0.224	0.0978	0.231	0.13	0.108	0.407	0.182	8.27	1.34	0.179	1	0.128	0.492	0.183	0.22	0.0951	0.502	-0.0572	8.27	-0.377	0.706	0.088	0.488	0.03	0.827
202146_at	3475	IFRD1	0.632	0.00435	-0.0142	0.953	0.577	0.0101	0.00794	0.97	0.251	0.329	-0.144	0.558	0.0594	0.796	0.0758	0.742	0.234	0.365	0.278	0.208	-0.0017	5.86	-0.00742	0.994	1	0.25	0.429	-0.00215	0.993	0.0441	0.855	-0.352	5.86	-1.36	0.173	-0.403	0.0621	0.0503	0.83
204064_at	9984	THOC1	0.224	0.00173	0.0103	0.895	0.0643	0.374	0.0766	0.27	0.0895	0.282	0.0465	0.559	0.0156	0.833	-0.0551	0.46	0.0103	0.902	0.149	0.0366	-0.0573	7.79	-0.772	0.441	1	0.114	0.267	0.0616	0.454	0.175	0.0251	-0.0378	7.79	-0.453	0.651	-0.147	0.0353	0.016	0.833
242034_at	64839	FBXL17	-0.217	0.00757	-0.066	0.46	-0.0518	0.529	0.025	0.751	-0.138	0.144	0.0102	0.91	-0.0898	0.288	-0.112	0.186	-0.127	0.183	0.00265	0.974	0.0811	5.72	0.96	0.337	0.923	-0.0629	0.589	0.0638	0.496	0.0141	0.873	0.092	5.72	0.969	0.333	0.0537	0.499	0.0175	0.838
218146_at	55830	GLT8D1	0.246	0.002	-0.0127	0.884	0.134	0.0963	-0.0613	0.427	-0.0982	0.288	-0.0265	0.764	0.0338	0.682	-0.0126	0.879	0.162	0.0823	0.0162	0.838	-0.127	7.07	-1.54	0.123	1	0.0375	0.741	0.00717	0.938	-0.0199	0.819	-0.0562	7.07	-0.606	0.545	-0.111	0.154	0.0169	0.841
212388_at	23358	USP24	0.349	3.98e-05	-0.00625	0.946	0.0721	0.398	-0.0856	0.297	0.104	0.291	-0.101	0.28	0.133	0.13	0.0321	0.716	0.0624	0.528	-0.0524	0.534	0.0336	5.35	0.383	0.702	1	0.0522	0.666	0.079	0.416	0.0184	0.842	-0.11	5.35	-1.12	0.264	-0.249	0.00259	0.0179	0.841
203080_s_at	29994	BAZ2B	0.365	0.00952	-0.252	0.103	0.189	0.183	0.115	0.397	-0.00987	0.952	-0.107	0.492	0.21	0.15	0.237	0.106	-0.0194	0.906	0.0747	0.594	-0.158	7.23	-1.08	0.28	1	-0.0295	0.883	0.257	0.112	0.00663	0.966	-0.256	7.23	-1.56	0.119	-0.263	0.0554	-0.029	0.845
228561_at	55664	CDC37L1	0.331	0.00695	-0.0266	0.843	-0.0926	0.454	0.0408	0.731	0.254	0.074	-0.0944	0.488	0.173	0.175	-0.0531	0.677	0.203	0.157	-0.0101	0.934	0.00743	6.11	0.0585	0.953	0.991	-0.23	0.19	-0.0517	0.713	-0.0754	0.572	-0.172	6.11	-1.2	0.229	-0.314	0.00872	0.025	0.847
220094_s_at	63933	MCUR1	0.511	0.000871	-0.0464	0.783	0.343	0.0271	0.127	0.393	0.177	0.319	0.169	0.32	0.313	0.0496	0.202	0.205	0.306	0.088	0.0171	0.911	0.117	5.69	0.732	0.464	1	0.197	0.37	0.199	0.26	-0.0317	0.85	0.0672	5.69	0.376	0.707	-0.165	0.271	0.0309	0.848
204023_at	5984	RFC4	0.266	0.000741	0.0635	0.462	0.0404	0.611	0.0994	0.193	0.121	0.187	0.0152	0.862	0.107	0.192	0.124	0.131	0.189	0.0401	0.0516	0.51	0.124	5.96	1.52	0.128	1	0.0346	0.759	-0.1	0.268	0.0715	0.405	-0.103	5.96	-1.13	0.26	-0.091	0.236	0.0156	0.851
201424_s_at	8451	CUL4A	0.245	0.00246	-0.157	0.077	0.131	0.109	0.0882	0.26	0.0755	0.421	-0.167	0.0625	0.136	0.104	0.136	0.107	0.0312	0.741	0.102	0.206	0.0604	4.39	0.721	0.471	1	-0.0324	0.779	0.0617	0.506	-0.0921	0.296	-0.153	4.39	-1.62	0.105	-0.265	0.000826	0.016	0.851
213410_at	26098	C10orf137	0.364	0.0044	-0.0833	0.552	0.11	0.395	-0.0447	0.718	0.0488	0.742	-0.0915	0.519	-0.0597	0.653	0.119	0.37	0.18	0.229	-0.0228	0.858	-0.0931	5.46	-0.702	0.483	1	0.0575	0.753	-0.0191	0.896	0.00949	0.946	-0.0929	5.46	-0.624	0.533	-0.295	0.0183	-0.0253	0.851
201134_x_at	1350	COX7C	0.332	0.00865	0.0236	0.865	0.0929	0.467	0.0574	0.64	0.0605	0.68	0.0652	0.642	0.0283	0.829	0.0152	0.908	0.242	0.101	0.0912	0.469	-0.0227	10.7	-0.173	0.863	1	0.0393	0.828	-0.146	0.315	-0.0342	0.804	-0.227	10.7	-1.54	0.124	-0.0037	0.976	-0.0247	0.853
215136_s_at	11340	EXOSC8	0.301	0.00794	-0.224	0.0723	0.258	0.0246	0.151	0.17	0.0433	0.742	-0.0373	0.767	0.164	0.164	0.186	0.116	0.0842	0.525	0.0933	0.408	-0.0576	4.96	-0.49	0.624	1	-0.041	0.801	-0.0621	0.633	-0.0918	0.457	-0.0882	4.96	-0.668	0.505	-0.235	0.0339	0.0221	0.853
222119_s_at	80204	FBXO11	0.543	0.00928	-0.183	0.423	0.141	0.504	-0.218	0.28	-0.0688	0.776	-0.342	0.14	0.244	0.259	-0.0573	0.792	0.377	0.122	0.00981	0.962	-0.0266	6.66	-0.123	0.902	1	0.0379	0.899	0.0632	0.792	-0.0288	0.899	-0.187	6.66	-0.771	0.441	-0.568	0.00538	-0.0395	0.857
202448_s_at	10444	ZER1	-0.292	0.000487	0.126	0.17	-0.128	0.131	-0.0371	0.647	0.116	0.232	0.12	0.196	0.00256	0.976	-0.0596	0.494	-0.0603	0.537	-0.0523	0.53	0.00243	6.48	0.028	0.978	1	0.0912	0.446	0.0635	0.509	0.165	0.0714	0.141	6.48	1.45	0.148	0.196	0.0164	-0.0157	0.859
212274_at	23175	LPIN1	0.409	0.00638	0.0346	0.833	0.173	0.253	0.0503	0.729	0.437	0.0121	0.132	0.429	0.156	0.314	0.122	0.434	0.128	0.463	-0.183	0.22	0.168	7.89	1.08	0.279	1	0.144	0.503	0.0938	0.586	0.0552	0.735	-0.139	7.89	-0.798	0.425	0.0693	0.635	-0.0278	0.86
228512_at	55037	PTCD3	0.315	0.00884	0.141	0.285	0.0805	0.508	-0.0957	0.412	0.232	0.0977	-0.00724	0.957	0.255	0.0416	-0.0484	0.699	0.239	0.0898	0.072	0.548	0.0245	5.94	0.196	0.845	0.979	-0.0387	0.822	0.37	0.00768	0.0933	0.477	-0.163	5.94	-1.16	0.246	-0.193	0.101	0.0222	0.861
202562_s_at	11161	C14orf1	0.266	0.00492	-0.0874	0.399	0.0239	0.803	0.00389	0.966	-0.0516	0.638	-0.127	0.227	0.0636	0.517	0.0563	0.567	0.06	0.587	0.0323	0.731	-0.141	7.37	-1.44	0.151	1	0.0545	0.687	0.129	0.237	-0.109	0.292	0.000479	7.37	0.00434	0.997	-0.0789	0.393	-0.0169	0.866
202640_s_at	8498	RANBP3	0.283	0.00131	-0.0359	0.71	0.213	0.0166	-0.0607	0.476	0.108	0.288	0.139	0.156	0.0327	0.72	0.0739	0.42	0.0078	0.939	-0.00161	0.985	-0.0102	7.29	-0.112	0.911	1	-0.0127	0.92	-0.164	0.104	-0.0369	0.7	0.0427	7.29	0.416	0.677	-0.0495	0.564	0.0156	0.867
209155_s_at	22978	NT5C2	0.334	0.00981	-0.266	0.0618	0.273	0.0372	0.0362	0.773	-0.0388	0.796	-0.153	0.288	0.108	0.421	0.0374	0.781	0.124	0.412	0.0918	0.477	0.0215	6.61	0.16	0.873	1	0.0096	0.959	0.00326	0.983	-0.032	0.821	-0.244	6.61	-1.62	0.106	-0.0958	0.448	-0.0228	0.868
207268_x_at	10152	ABI2	-0.333	0.000349	0.0649	0.523	-0.184	0.0499	-0.101	0.26	0.161	0.135	-0.0324	0.753	-0.106	0.271	-0.072	0.456	0.105	0.334	0.0379	0.682	0.123	8.18	1.28	0.202	1	-0.0445	0.738	0.281	0.00865	0.0377	0.71	0.146	8.18	1.35	0.178	0.093	0.304	-0.0162	0.869
204671_s_at	22881	ANKRD6	0.327	0.000834	0.02	0.852	0.0278	0.778	0.00539	0.955	0.045	0.691	0.0937	0.388	-0.0295	0.771	0.0926	0.363	0.12	0.293	0.00771	0.937	0.233	5.09	2.3	0.0217	1	0.0398	0.776	-0.0143	0.899	-0.0454	0.67	0.138	5.09	1.21	0.227	-0.107	0.262	-0.0168	0.87
223180_s_at	29090	TIMM21	0.364	0.00198	0.138	0.284	0.185	0.12	0.0309	0.786	0.101	0.46	-0.0736	0.573	0.201	0.0992	0.0548	0.654	0.375	0.00645	-0.0209	0.859	-0.0884	7.42	-0.725	0.469	0.923	0.0905	0.59	0.00428	0.975	-0.0878	0.493	-0.371	7.42	-2.71	0.00697	-0.142	0.217	-0.02	0.872
223131_s_at	81603	TRIM8	-0.296	0.006	0.161	0.174	0.0305	0.779	-0.0663	0.526	0.107	0.391	0.0736	0.539	0.0306	0.784	-0.0074	0.947	0.0974	0.439	-0.0398	0.711	0.0205	4.59	0.183	0.855	0.98	0.22	0.155	0.141	0.254	-0.0119	0.919	0.0736	4.59	0.586	0.558	0.042	0.69	0.0176	0.877
230720_at	221687	RNF182	0.368	0.0053	-0.0865	0.55	0.0382	0.774	0.0913	0.475	0.14	0.362	-0.143	0.329	0.0443	0.746	0.0411	0.765	0.133	0.39	-0.216	0.101	-0.0302	6.72	-0.22	0.826	0.977	0.234	0.215	-0.127	0.402	-0.405	0.005	-0.255	6.72	-1.66	0.0973	-0.196	0.127	-0.0206	0.882
201838_s_at	9913	SUPT7L	0.168	0.00645	0.11	0.105	-0.0455	0.465	-0.0632	0.292	0.0267	0.709	0.13	0.0579	-0.124	0.0529	0.0486	0.45	-0.125	0.0841	0.00109	0.986	-0.0256	6.29	-0.4	0.689	1	0.0644	0.466	-0.0858	0.227	0.0847	0.208	-0.0279	6.29	-0.388	0.698	-0.0834	0.167	0.00962	0.883
221190_s_at	29919	C18orf8	0.279	0.00405	-0.0455	0.67	0.0531	0.589	0.00646	0.945	0.0983	0.384	-0.0686	0.525	0.0497	0.622	0.172	0.0902	0.383	0.000774	0.00226	0.981	-0.00501	6.59	-0.0497	0.96	1	0.0499	0.72	0.0716	0.522	0.00803	0.94	0.107	6.59	0.944	0.345	-0.159	0.0939	0.0149	0.884
242064_at	54549	SDK2	0.25	0.00133	-0.106	0.216	0.0223	0.777	0.0197	0.794	-0.0393	0.663	-0.0638	0.46	-0.024	0.766	0.053	0.512	-0.149	0.101	-0.105	0.177	-0.0861	5.99	-1.07	0.286	0.923	0.0213	0.848	-0.246	0.00607	-0.169	0.0463	-0.0337	5.99	-0.372	0.71	-0.00977	0.897	0.0118	0.886
204838_s_at	27030	MLH3	0.277	0.000212	-0.056	0.493	0.221	0.00335	0.196	0.00678	0.0506	0.559	0.048	0.562	0.13	0.0939	0.0537	0.489	0.131	0.133	0.136	0.0673	0.095	5.99	1.23	0.22	1	0.16	0.134	0.118	0.168	0.0422	0.603	-0.000458	5.99	-0.00527	0.996	-0.0294	0.685	-0.0113	0.886
207152_at	4915	NTRK2	-0.295	0.00163	-0.0138	0.893	-0.193	0.0416	-0.0158	0.862	0.0079	0.942	-0.0421	0.686	-0.159	0.102	-0.0104	0.915	-0.00788	0.943	-0.0533	0.568	-0.0394	7.55	-0.405	0.685	1	0.0217	0.871	0.105	0.331	-0.0109	0.915	0.0549	7.55	0.503	0.615	-0.0352	0.7	-0.014	0.888
202763_at	836	CASP3	0.171	0.00981	0.00832	0.909	0.168	0.0125	0.0874	0.174	0.111	0.149	-0.0105	0.886	0.0873	0.205	0.0922	0.182	-0.0303	0.696	0.0689	0.297	0.0197	6.01	0.286	0.775	1	0.0757	0.425	0.0567	0.457	0.011	0.879	0.144	6.01	1.86	0.0636	-0.0502	0.438	0.0098	0.889
214087_s_at	4604	MYBPC1	0.475	0.00945	-0.0218	0.913	0.299	0.106	0.278	0.118	0.0717	0.736	0.00903	0.965	0.24	0.206	0.1	0.599	0.0148	0.945	0.238	0.192	-0.103	6.96	-0.541	0.588	1	-0.0148	0.955	0.176	0.404	0.00893	0.964	-0.387	6.96	-1.81	0.0706	0.0874	0.625	0.027	0.889
227522_at	134147	CMBL	0.399	0.0047	0.0937	0.545	0.179	0.21	0.149	0.277	0.298	0.0686	0.121	0.44	0.273	0.0622	0.178	0.225	0.193	0.241	-0.0743	0.597	0.0562	6.79	0.384	0.701	0.957	0.202	0.318	-0.17	0.295	-0.0819	0.594	-0.125	6.79	-0.758	0.449	-0.0186	0.892	0.0207	0.889
203209_at	5985	RFC5	0.188	0.00885	-0.0263	0.738	-0.0546	0.451	0.0984	0.157	0.0247	0.766	-0.0711	0.373	0.0299	0.688	-0.0779	0.297	0.0997	0.235	-0.0182	0.799	0.119	4.94	1.6	0.11	1	0.0398	0.698	0.0286	0.728	0.00358	0.963	0.00816	4.94	0.0975	0.922	-0.0332	0.636	-0.0102	0.893
34478_at	9230	RAB11B	-0.236	0.00665	0.0794	0.406	-0.098	0.265	-0.0924	0.273	0.0478	0.636	0.108	0.264	0.0124	0.891	-0.0662	0.465	-0.0331	0.745	-0.176	0.0421	0.117	5.54	1.29	0.196	1	0.0922	0.459	0.133	0.184	-0.0367	0.699	0.123	5.54	1.21	0.226	-0.00562	0.947	-0.0121	0.895
243672_at	27164	SALL3	0.282	0.00951	0.0268	0.822	0.126	0.25	0.246	0.02	0.159	0.21	-0.0183	0.88	0.0259	0.819	0.0459	0.685	0.0304	0.811	-0.0658	0.544	-0.0695	6.16	-0.615	0.539	0.934	0.121	0.437	0.0977	0.435	0.0172	0.885	-0.0713	6.16	-0.561	0.575	-0.00383	0.971	0.0149	0.897
217781_s_at	64397	ZNF106	0.325	0.00961	0.0893	0.516	0.00846	0.947	-0.109	0.37	0.202	0.164	-0.0281	0.84	0.169	0.195	0.00373	0.977	0.138	0.348	0.165	0.186	0.0148	8.51	0.113	0.91	1	-0.0619	0.73	-0.0292	0.839	0.0131	0.924	-0.129	8.51	-0.885	0.377	-0.135	0.27	0.0171	0.897
211000_s_at	3572	IL6ST	-0.29	0.00724	-0.184	0.12	-0.104	0.34	-0.0704	0.501	-0.0417	0.739	0.0807	0.501	-0.119	0.289	-0.117	0.297	-0.119	0.343	-0.063	0.558	0.0981	5.37	0.877	0.381	1	0.229	0.138	0.216	0.0811	-0.158	0.18	0.118	5.37	0.935	0.35	0.115	0.275	0.0141	0.902
208990_s_at	3189	HNRNPH3	0.461	0.00313	-0.195	0.255	0.237	0.132	0.00641	0.966	0.118	0.516	-0.0803	0.642	0.291	0.0716	0.136	0.401	0.218	0.231	0.198	0.203	-0.0295	8.41	-0.183	0.855	1	0.00462	0.983	0.195	0.275	-0.0375	0.825	-0.199	8.41	-1.1	0.273	-0.26	0.0874	-0.0201	0.903
227426_at	6654	SOS1	0.316	0.00495	0.00333	0.978	0.332	0.00351	0.24	0.0277	0.246	0.0602	0.0897	0.473	0.406	0.000536	0.241	0.0395	0.231	0.0793	0.241	0.0317	0.00404	6.89	0.0346	0.972	0.995	-0.0416	0.796	0.0807	0.532	0.0408	0.739	-0.146	6.89	-1.11	0.266	-0.131	0.233	0.0144	0.903
209302_at	5437	POLR2H	0.28	0.00959	0.0379	0.75	0.125	0.255	0.092	0.381	0.0935	0.457	0.0519	0.666	0.0105	0.925	0.0308	0.785	0.117	0.353	0.0575	0.594	-0.0464	7.71	-0.413	0.68	1	0.0578	0.709	-0.0588	0.637	-0.086	0.466	-0.0123	7.71	-0.0976	0.922	0.0248	0.814	-0.0138	0.904
218508_at	55802	DCP1A	0.219	0.00896	-0.0809	0.378	0.0518	0.539	-0.00185	0.982	0.00832	0.932	0.109	0.24	-0.0254	0.77	0.0314	0.719	0.0895	0.36	-0.0317	0.703	0.0152	7.47	0.175	0.861	1	-0.06	0.616	0.0477	0.619	0.00937	0.918	-0.017	7.47	-0.174	0.862	0.053	0.516	0.0104	0.906
228931_at	51117	COQ4	0.321	0.00961	0.218	0.109	0.197	0.115	0.13	0.279	0.0229	0.874	0.0968	0.482	0.0975	0.448	0.157	0.224	0.162	0.264	0.0684	0.579	-0.0146	5.98	-0.114	0.909	0.985	0.131	0.459	-0.262	0.0663	-0.07	0.604	0.0743	5.98	0.515	0.607	-0.118	0.33	0.0149	0.909
220647_s_at	51287	COA4	0.303	0.00376	-0.192	0.0945	0.177	0.0929	0.175	0.0832	0.0446	0.713	0.03	0.796	0.311	0.00413	0.0304	0.779	-0.0235	0.847	0.169	0.105	-0.068	6.2	-0.627	0.531	1	0.0845	0.571	-0.0144	0.904	-0.137	0.228	-0.0496	6.2	-0.408	0.684	-0.0592	0.561	-0.0124	0.91
57532_at	1856	DVL2	0.211	0.00712	0.119	0.167	0.154	0.0529	0.0462	0.544	0.0279	0.76	-0.0392	0.653	0.037	0.65	0.0158	0.846	-0.0781	0.395	0.0166	0.831	-0.00258	7.13	-0.0316	0.975	1	0.024	0.831	-0.0128	0.888	0.0871	0.309	0.0747	7.13	0.816	0.415	0.0925	0.227	-0.00922	0.911
212651_at	9886	RHOBTB1	0.235	0.0062	0.00998	0.915	0.0878	0.31	0.0925	0.266	0.0785	0.43	-0.033	0.729	0.122	0.17	0.112	0.208	0.0972	0.332	0.0347	0.685	-0.007	4.94	-0.0787	0.937	1	0.0805	0.511	-0.00634	0.949	0.123	0.188	0.0715	4.94	0.715	0.475	-0.154	0.0664	0.00992	0.913
204202_at	23288	IQCE	0.45	0.000469	0.038	0.788	-0.0312	0.81	-0.0173	0.89	0.218	0.144	0.00399	0.978	0.0791	0.553	0.233	0.0821	0.159	0.291	-0.169	0.188	0.0706	6.5	0.529	0.597	1	0.138	0.452	-0.146	0.324	0.0696	0.619	0.0498	6.5	0.333	0.74	-0.202	0.108	-0.0147	0.913
201948_at	29889	GNL2	0.235	0.00104	-0.0211	0.788	0.0271	0.707	0.0825	0.234	-0.0515	0.535	0.0721	0.364	-0.0173	0.815	0.0394	0.597	0.0101	0.903	0.0279	0.695	0.00974	4.69	0.131	0.896	1	-0.0548	0.592	-0.134	0.104	0.0264	0.735	-0.0609	4.69	-0.73	0.465	-0.163	0.0197	-0.00798	0.916
209422_at	51230	PHF20	0.604	0.00979	-0.0972	0.705	0.4	0.0907	0.0202	0.929	0.186	0.494	-0.158	0.542	0.328	0.176	0.202	0.407	0.434	0.112	0.0437	0.851	-0.0979	6.56	-0.403	0.687	1	-0.000999	0.998	-0.045	0.867	-0.000408	0.999	-0.102	6.56	-0.374	0.709	-0.381	0.0947	-0.0237	0.923
218090_s_at	55717	WDR11	0.381	0.00877	-0.177	0.267	0.177	0.228	-0.0552	0.695	0.117	0.49	-0.293	0.0697	0.0992	0.511	0.211	0.164	0.176	0.301	0.131	0.366	-0.0622	5.73	-0.412	0.68	1	0.198	0.342	0.0338	0.839	-0.167	0.292	-0.184	5.73	-1.08	0.279	-0.438	0.00206	0.0125	0.935
234990_at	23468	CBX5	-0.326	0.00767	-0.0429	0.749	-0.244	0.0484	-0.0515	0.663	-0.0136	0.923	-0.123	0.366	-0.00262	0.984	-0.151	0.236	-0.193	0.177	-0.116	0.34	0.226	4.67	1.78	0.0752	0.923	0.152	0.385	-0.15	0.284	-0.173	0.193	0.027	4.67	0.19	0.849	0.0545	0.647	-0.0103	0.937
209084_s_at	9364	RAB28	0.278	0.00804	-0.155	0.179	0.00509	0.962	0.0298	0.769	0.136	0.266	-0.147	0.207	0.21	0.0538	0.158	0.149	0.159	0.194	0.0324	0.756	0.0657	5.87	0.604	0.546	1	0.091	0.544	0.321	0.00798	-0.11	0.335	-0.14	5.87	-1.15	0.252	-0.292	0.00441	0.00872	0.937
203787_at	23635	SSBP2	0.303	0.00383	-0.0403	0.726	0.115	0.278	0.0986	0.331	0.0679	0.576	0.0176	0.88	0.0433	0.69	0.0526	0.629	0.119	0.331	0.105	0.314	-0.0668	6.14	-0.615	0.539	1	0.0391	0.794	-0.0191	0.874	0.0031	0.978	-0.126	6.14	-1.03	0.303	-0.239	0.0193	-0.00852	0.939
209290_s_at	4781	NFIB	0.448	0.0046	-0.227	0.191	0.259	0.105	0.211	0.169	0.203	0.268	0.00538	0.976	0.23	0.16	0.22	0.182	0.276	0.135	-0.162	0.304	0.187	7.5	1.14	0.255	1	-0.0148	0.948	0.443	0.0148	-0.102	0.552	-0.0689	7.5	-0.374	0.708	-0.172	0.264	0.0127	0.939
201206_s_at	6238	RRBP1	-0.239	0.0089	-0.0544	0.588	-0.0939	0.309	-0.0377	0.67	-0.129	0.224	0.0735	0.47	0.00672	0.944	-0.0761	0.424	-0.0916	0.392	-0.054	0.554	-0.178	6.11	-1.88	0.061	1	0.00968	0.941	0.0848	0.42	0.0305	0.76	0.0411	6.11	0.385	0.7	-0.0856	0.337	-0.00726	0.94
222014_x_at	25821	MTO1	0.302	0.00995	-0.078	0.544	0.168	0.154	0.0188	0.869	0.0477	0.725	0.0201	0.877	0.0933	0.442	0.127	0.297	0.00104	0.994	0.0664	0.569	-0.0324	5.32	-0.266	0.79	1	0.0688	0.681	-0.255	0.0582	0.0149	0.907	-0.0135	5.32	-0.0988	0.921	-0.156	0.173	0.00908	0.941
219061_s_at	8270	LAGE3	0.346	0.00581	0.0926	0.501	0.206	0.105	0.0786	0.518	0.112	0.441	-0.0295	0.832	0.00576	0.965	0.063	0.63	0.215	0.144	0.0057	0.964	0.0021	7.71	0.0161	0.987	1	-0.0737	0.682	-0.00215	0.988	-0.0135	0.921	-0.0466	7.71	-0.318	0.75	-0.152	0.216	-0.00971	0.942
218932_at	54680	ZNHIT6	0.352	0.00953	-0.311	0.0371	0.222	0.107	-0.0375	0.776	0.191	0.227	-0.248	0.101	0.165	0.243	0.0401	0.777	0.172	0.279	0.195	0.151	0.0082	6.32	0.0581	0.954	1	0.0258	0.895	0.279	0.0741	-0.0215	0.884	-0.0445	6.32	-0.281	0.779	-0.349	0.00871	0.0104	0.942
242665_at	114793	FMNL2	-0.498	0.00441	-0.211	0.272	-0.201	0.255	0.00364	0.983	0.0404	0.842	0.158	0.416	0.123	0.496	0.0393	0.829	0.251	0.218	0.0946	0.587	0.117	6.17	0.643	0.52	0.932	0.18	0.471	0.278	0.167	-0.302	0.113	0.0921	6.17	0.452	0.651	0.000931	0.996	-0.013	0.944
227924_at	54891	INO80D	-0.191	0.00408	0.217	0.00301	-0.0681	0.31	0.0504	0.435	-0.0245	0.751	-0.0523	0.479	0.00673	0.922	-0.0052	0.94	-0.0391	0.615	-0.011	0.868	-0.0239	7.79	-0.346	0.73	0.962	0.0632	0.507	-0.0668	0.382	-0.0262	0.718	-0.0246	7.79	-0.317	0.752	0.0357	0.582	0.00475	0.946
209572_s_at	8726	EED	0.346	0.00332	-0.189	0.144	0.139	0.242	0.015	0.895	0.0429	0.753	-0.0415	0.751	0.123	0.313	0.123	0.316	0.213	0.121	0.168	0.152	-0.0735	5.7	-0.602	0.548	1	-0.127	0.45	0.0532	0.694	-0.0804	0.531	-0.156	5.7	-1.14	0.256	-0.226	0.0496	-0.00814	0.948
210754_s_at	4067	LYN	-0.368	0.00396	-0.2	0.153	-0.396	0.00221	0.0101	0.935	-0.434	0.00349	-0.144	0.309	-0.191	0.149	-0.137	0.303	-0.141	0.343	-0.12	0.344	0.105	5.63	0.795	0.427	1	-0.233	0.203	0.169	0.249	-0.25	0.0727	-0.186	5.63	-1.25	0.213	-0.153	0.221	0.0085	0.95
228007_at	387119	CEP85L	0.22	0.00846	-0.0485	0.596	0.0661	0.433	0.0444	0.583	0.0839	0.387	-0.0563	0.543	0.19	0.0288	0.105	0.229	0.189	0.0528	0.0139	0.867	-0.0285	6.59	-0.328	0.743	0.962	-0.0482	0.686	-0.0216	0.822	-0.0126	0.89	-0.0894	6.59	-0.918	0.359	-0.0484	0.552	0.00547	0.95
205729_at	9180	OSMR	-0.276	0.000782	-0.155	0.0864	-0.153	0.0655	-0.104	0.193	-0.0649	0.496	-0.109	0.232	-0.0474	0.578	-0.0894	0.296	-0.0107	0.912	-0.0461	0.574	0.0154	5.27	0.18	0.857	1	-0.161	0.172	-0.000718	0.994	-0.205	0.0226	-0.132	5.27	-1.38	0.168	0.0841	0.295	-0.00532	0.951
213185_at	23247	KIAA0556	0.214	0.00669	0.0306	0.724	0.0795	0.319	-0.0559	0.466	0.142	0.121	0.0691	0.431	0.183	0.0258	0.00538	0.948	-0.0547	0.554	-0.111	0.159	0.0456	7.28	0.555	0.579	1	0.137	0.225	0.17	0.0609	0.0188	0.827	0.0257	7.28	0.279	0.78	-0.103	0.182	-0.00496	0.953
219639_x_at	56965	PARP6	0.238	0.00554	0.0663	0.481	0.137	0.116	-0.0935	0.262	0.05	0.616	0.108	0.257	0.0668	0.453	0.014	0.875	0.199	0.0474	0.0982	0.251	0.0323	8.5	0.363	0.717	1	0.0539	0.661	-0.0405	0.681	-0.0356	0.704	0.0537	8.5	0.537	0.592	-0.0673	0.422	-0.00532	0.953
220050_at	11092	C9orf9	0.204	0.00363	0.0173	0.822	-0.0444	0.53	0.105	0.124	0.00746	0.927	0.142	0.0684	-0.0117	0.872	0.0777	0.287	-0.0919	0.262	-0.0279	0.69	0.0106	5.28	0.146	0.884	1	0.0599	0.55	-0.0343	0.67	0.0341	0.655	0.0945	5.28	1.16	0.248	-0.0306	0.654	-0.0043	0.954
203493_s_at	9702	CEP57	0.192	0.00125	-0.0283	0.665	-0.0213	0.723	-0.0783	0.175	0.0199	0.773	-0.0594	0.369	0.0324	0.6	0.0641	0.301	0.0913	0.19	0.0196	0.741	-0.0335	4.41	-0.542	0.588	1	-0.0449	0.598	0.0801	0.242	-0.0271	0.676	-0.0713	4.41	-1.03	0.305	-0.0785	0.177	-0.00347	0.956
218716_x_at	25821	MTO1	0.231	0.00789	0.0283	0.766	-0.0239	0.785	-0.0749	0.374	0.0855	0.397	-0.0156	0.872	0.00433	0.962	0.0127	0.888	0.00294	0.977	0.0174	0.84	0.0919	5.99	1.02	0.308	1	0.0406	0.744	-0.0544	0.586	0.0494	0.602	0.0319	5.99	0.315	0.753	-0.0807	0.341	0.00505	0.956
49306_at	83937	RASSF4	-0.297	0.00223	-0.046	0.666	-0.168	0.0869	-0.0306	0.745	-0.0684	0.544	0.015	0.889	0.00959	0.924	-0.0949	0.348	0.136	0.232	-0.0262	0.786	0.0378	5.59	0.375	0.708	1	-0.00732	0.958	0.267	0.017	-0.248	0.0196	-0.0604	5.59	-0.533	0.594	-0.0134	0.888	-0.0054	0.958
211019_s_at	4047	LSS	-0.307	0.00805	-0.0492	0.699	-0.231	0.0487	-0.0478	0.671	0.0393	0.77	0.00269	0.983	0.0541	0.653	-0.0481	0.69	-0.099	0.465	-0.000914	0.994	-0.117	6.3	-0.969	0.333	1	0.034	0.837	0.162	0.225	0.057	0.652	-0.0393	6.3	-0.291	0.772	-0.113	0.317	-0.00613	0.96
217936_at	394	ARHGAP5	0.381	0.00836	-0.368	0.0204	0.131	0.369	0.0456	0.745	0.225	0.181	-0.098	0.542	0.282	0.0599	0.119	0.428	0.176	0.297	0.0974	0.499	0.075	8.19	0.5	0.617	1	-0.00842	0.968	0.388	0.0196	-0.223	0.157	-0.281	8.19	-1.67	0.0961	-0.359	0.0111	0.00749	0.961
212780_at	6654	SOS1	0.177	0.00901	0.0533	0.474	0.0357	0.603	0.01	0.879	0.034	0.667	-0.125	0.0981	0.0904	0.2	0.146	0.04	0.076	0.338	0.0547	0.419	0.108	4.87	1.53	0.126	1	0.122	0.211	0.0277	0.723	-0.0401	0.588	-0.13	4.87	-1.64	0.101	-0.117	0.0782	-0.00345	0.962
227986_at	79175	ZNF343	-0.214	0.00729	0.086	0.325	-0.0352	0.661	0.0236	0.76	-0.0861	0.352	-0.116	0.189	0.00329	0.968	-0.116	0.162	-0.146	0.116	0.018	0.82	0.0253	7.04	0.307	0.759	0.962	0.141	0.215	-0.0549	0.549	-0.0773	0.373	-0.096	7.04	-1.03	0.301	-0.0401	0.605	0.00399	0.962
200685_at	9295	SRSF11	0.293	0.00315	-0.0686	0.528	0.121	0.228	0.0389	0.686	0.117	0.312	-0.0784	0.477	0.0813	0.429	0.102	0.323	0.107	0.358	0.0451	0.648	0.105	4.61	1.02	0.309	1	0.0621	0.662	-0.00274	0.981	0.0439	0.685	-0.189	4.61	-1.63	0.103	-0.222	0.022	0.00487	0.963
233467_s_at	10077	TSPAN32	-0.27	0.000757	-0.0127	0.885	0.16	0.0472	-0.0574	0.459	-0.0591	0.524	0.156	0.079	0.012	0.885	0.111	0.181	-0.0882	0.346	0.0607	0.446	0.00278	5.99	0.0335	0.973	0.995	0.0816	0.475	0.109	0.234	-0.0354	0.684	0.136	5.99	1.46	0.144	0.136	0.0816	-0.00338	0.968
222164_at	2260	FGFR1	0.186	0.005	-0.0352	0.628	0.114	0.0874	0.0345	0.591	-0.0589	0.444	-0.047	0.523	0.00487	0.943	-0.0426	0.537	0.0258	0.739	0.123	0.0633	-0.0356	4.81	-0.518	0.605	1	0.0128	0.892	-0.00215	0.977	0.048	0.506	-0.0275	4.81	-0.356	0.722	-0.0138	0.831	-0.00261	0.97
218100_s_at	55081	IFT57	0.47	0.00289	-0.0737	0.67	0.084	0.597	-0.0587	0.7	0.119	0.516	-0.117	0.506	0.0572	0.726	0.101	0.539	0.171	0.353	0.136	0.385	-0.0622	5.44	-0.381	0.704	1	0.101	0.655	-0.142	0.434	-0.207	0.228	-0.177	5.44	-0.963	0.336	-0.247	0.108	0.00526	0.975
209455_at	23291	FBXW11	0.35	0.00319	-0.0888	0.495	0.0826	0.491	-0.0577	0.616	0.0692	0.615	0.0973	0.46	0.208	0.0917	0.102	0.411	0.205	0.139	0.0338	0.775	-0.0874	7.93	-0.71	0.478	1	0.173	0.309	0.168	0.218	0.00632	0.961	-0.105	7.93	-0.759	0.448	-0.3	0.00968	-0.00382	0.976
239725_at	80055	PGAP1	0.351	0.00992	-0.0197	0.895	0.166	0.228	0.0124	0.925	-0.061	0.7	-0.442	0.00362	0.0477	0.736	0.0569	0.688	0.0803	0.614	0.066	0.627	-0.124	5.54	-0.874	0.382	0.923	0.148	0.447	-0.145	0.355	-0.322	0.0303	-0.248	5.54	-1.56	0.12	-0.00813	0.951	0.00423	0.977
209907_s_at	50618	ITSN2	0.295	0.00248	-0.0279	0.794	0.0561	0.569	0.111	0.241	0.144	0.204	-0.0555	0.608	-0.11	0.276	0.0835	0.41	0.0165	0.885	0.0761	0.433	0.0159	7	0.157	0.875	1	0.183	0.189	-0.0599	0.593	0.083	0.434	-0.195	7	-1.71	0.087	-0.0895	0.346	-0.00255	0.98
242242_at	9098	USP6	-0.209	0.00875	-0.0603	0.49	0.0159	0.843	-0.0445	0.564	-0.161	0.0811	0.0675	0.445	-0.154	0.062	-0.021	0.8	-0.119	0.202	-0.0195	0.806	0.0623	6.49	0.753	0.452	0.923	0.177	0.121	-0.00321	0.972	-0.064	0.461	-0.0766	6.49	-0.825	0.41	-0.0144	0.853	-0.00199	0.981
220746_s_at	51720	UIMC1	0.218	0.00323	0.0471	0.561	0.0882	0.237	0.087	0.224	0.0994	0.246	0.0872	0.288	0.0975	0.203	0.154	0.0449	0.143	0.0967	0.153	0.0372	0.0659	6.67	0.86	0.39	1	-0.111	0.292	0.0867	0.307	0.0448	0.578	0.0573	6.67	0.665	0.506	0.163	0.0239	-0.00178	0.982
205728_at	10178	TENM1	0.359	0.000899	-0.0119	0.92	-0.0165	0.88	0.0335	0.749	0.0808	0.519	-0.188	0.118	-0.00918	0.935	0.0073	0.948	0.146	0.248	0.227	0.0355	-0.00797	4.37	-0.071	0.943	1	-0.0728	0.638	-0.074	0.551	-0.0783	0.506	0.062	4.37	0.492	0.623	-0.0643	0.542	0.00247	0.983
228003_at	27314	RAB30	-0.165	0.00991	0.00705	0.92	0.0691	0.285	0.0544	0.38	-0.0529	0.476	-0.0808	0.256	0.097	0.144	-0.0445	0.504	-0.115	0.124	0.0334	0.6	-0.0452	7.19	-0.681	0.496	0.926	-0.0358	0.696	0.0984	0.181	0.00294	0.966	0.0583	7.19	0.782	0.435	-0.00828	0.894	0.00144	0.983
212255_s_at	27032	ATP2C1	0.335	0.00191	-0.237	0.0453	0.0121	0.911	0.0533	0.61	0.0144	0.909	-0.16	0.183	0.0279	0.803	0.0884	0.431	0.0485	0.7	0.03	0.78	-0.00754	7.01	-0.0675	0.946	1	0.164	0.287	0.031	0.802	-0.175	0.137	-0.165	7.01	-1.31	0.19	-0.104	0.322	-0.00198	0.986
225570_at	254428	SLC41A1	0.276	0.00559	-0.0236	0.829	0.205	0.0419	0.191	0.0484	0.451	0.000104	0.0349	0.752	0.319	0.0021	0.129	0.212	0.274	0.0185	0.101	0.307	-0.00276	8.03	-0.0267	0.979	0.996	0.0132	0.926	0.0971	0.396	-0.0912	0.4	-0.204	8.03	-1.76	0.0787	-0.098	0.313	0.00179	0.986
209538_at	7580	ZNF32	0.337	0.00553	-0.0118	0.93	0.085	0.488	0.0394	0.738	0.123	0.384	0.00815	0.952	0.233	0.0649	0.0578	0.648	0.0366	0.796	0.228	0.0602	-0.01	6.97	-0.0796	0.937	1	-0.0932	0.592	0.13	0.353	0.0315	0.812	-0.0552	6.97	-0.39	0.697	-0.186	0.116	-0.00208	0.987
43934_at	56834	GPR137	-0.273	0.0023	0.0514	0.6	-0.0835	0.354	0.0117	0.892	0.0644	0.534	-0.0152	0.878	-0.117	0.209	-0.0752	0.418	-0.0212	0.839	-0.0183	0.837	0.0149	7.17	0.161	0.872	1	-0.00636	0.96	0.218	0.0343	0.0823	0.398	0.0383	7.17	0.368	0.713	0.115	0.188	-0.00129	0.989
214435_x_at	5898	RALA	-0.289	0.00289	-0.0208	0.845	-0.189	0.054	0.045	0.632	-0.0544	0.629	-0.113	0.295	0.0054	0.957	-0.0676	0.503	0.0866	0.445	0.0359	0.71	0.036	4.76	0.358	0.721	1	0.141	0.309	0.128	0.251	-0.0469	0.657	0.00463	4.76	0.0409	0.967	-0.0252	0.79	-0.00132	0.99
202412_s_at	7398	USP1	-0.29	0.0089	-0.174	0.152	-0.192	0.0853	0.00744	0.945	-0.0535	0.677	-0.0539	0.661	-0.129	0.26	-0.0502	0.663	0.0824	0.524	0.11	0.32	0.0921	4.44	0.802	0.423	1	0.141	0.375	0.203	0.11	-0.214	0.0765	0.0555	4.44	0.43	0.667	-0.12	0.267	-0.0014	0.99
241805_at	2565	GABRG1	0.515	0.00176	-0.00462	0.98	0.216	0.193	0.288	0.0716	0.397	0.0382	0.0687	0.707	0.333	0.0512	0.336	0.05	0.199	0.301	0.257	0.118	-0.175	5.36	-1.02	0.307	0.923	0.241	0.307	0.331	0.0807	0.0686	0.702	-0.374	5.36	-1.95	0.052	-0.0404	0.801	-0.00142	0.993
205436_s_at	3014	H2AFX	0.313	0.00664	-0.271	0.0326	0.308	0.0084	0.0598	0.593	0.0123	0.927	0.157	0.221	0.206	0.086	0.013	0.914	0.123	0.363	0.0227	0.844	-0.146	8.23	-1.21	0.225	1	0.027	0.87	0.0665	0.616	-0.0604	0.631	-0.0606	8.23	-0.45	0.653	-0.0953	0.397	0.000989	0.994
213306_at	8777	MPDZ	0.344	0.00465	-0.245	0.0663	0.237	0.0537	-0.0246	0.835	0.00974	0.945	-0.145	0.284	0.0612	0.628	0.072	0.569	0.156	0.272	0.105	0.387	-0.016	8.58	-0.127	0.899	1	0.129	0.46	0.239	0.088	-0.0576	0.664	-0.196	8.58	-1.39	0.166	-0.281	0.0179	-0.00096	0.994
208935_s_at	3964	LGALS8	0.288	0.00759	-0.068	0.566	0.0613	0.574	-0.018	0.863	0.0563	0.654	-0.0254	0.832	0.0994	0.375	0.0426	0.705	0.062	0.623	0.203	0.0592	-0.0862	4.56	-0.769	0.442	1	-0.238	0.123	0.0313	0.801	-0.0808	0.492	-0.00397	4.56	-0.0315	0.975	0.0254	0.81	-0.000643	0.995
202440_s_at	6764	ST5	0.251	0.00704	-0.144	0.157	0.119	0.205	0.149	0.0982	0.12	0.266	0.144	0.165	0.0428	0.657	0.177	0.0674	0.0212	0.845	0.165	0.0748	-0.131	7.11	-1.36	0.174	1	0.0339	0.799	0.106	0.322	-0.116	0.253	0.0632	7.11	0.583	0.56	0.109	0.23	2.6e-05	1
224735_at	220002	CYB561A3	0.0761	0.252	0.202	0.0058	0.0737	0.273	0.12	0.0621	0.0924	0.232	0.0626	0.397	0.106	0.124	0.00133	0.985	-0.0183	0.814	0.158	0.0177	0.0742	7.86	1.07	0.283	0.923	-0.127	0.182	0.0183	0.811	0.0167	0.818	-0.0346	7.86	-0.446	0.655	0.017	0.794	0.175	0.0128
205474_at	51379	CRLF3	0.168	0.0441	-0.268	0.00357	-0.12	0.154	0.0635	0.433	0.000906	0.993	-0.149	0.108	0.0434	0.616	-0.0242	0.781	-0.015	0.878	0.00142	0.986	0.151	6.23	1.74	0.0829	1	0.144	0.229	0.0304	0.752	-0.0403	0.658	0.00358	6.23	0.0367	0.971	0.0292	0.72	0.206	0.0199
201849_at	664	BNIP3	0.12	0.558	-0.625	0.00568	0.00524	0.98	-0.264	0.185	-0.0124	0.958	-0.382	0.0945	-0.123	0.564	-0.156	0.466	0.232	0.334	-0.297	0.146	-0.257	9.16	-1.2	0.229	1	-0.336	0.253	-0.19	0.42	-0.642	0.00426	-0.529	9.16	-2.21	0.0275	-0.551	0.00609	-0.465	0.0322
200629_at	7453	WARS	-0.0707	0.748	-0.634	0.009	-0.269	0.228	-0.378	0.0774	-0.585	0.0225	-0.337	0.169	-0.387	0.0911	-0.32	0.163	0.0356	0.89	-0.282	0.199	-0.411	7.62	-1.79	0.0733	1	-0.576	0.0683	-0.731	0.00406	-0.647	0.00733	-0.394	7.62	-1.53	0.126	-0.272	0.206	-0.452	0.0523
212462_at	23522	KAT6B	0.311	0.0119	-0.352	0.00972	0.212	0.0906	0.0336	0.78	0.074	0.607	-0.272	0.0488	0.246	0.056	0.0171	0.894	0.174	0.229	0.107	0.385	-0.0459	7.2	-0.357	0.721	1	0.156	0.378	0.334	0.0192	-0.15	0.268	0.00893	7.2	0.0618	0.951	-0.163	0.179	0.253	0.0532
203312_x_at	382	ARF6	-0.116	0.301	-0.358	0.00385	0.105	0.354	0.0159	0.884	0.0358	0.784	-0.275	0.0277	-0.0669	0.566	0.0609	0.603	0.169	0.198	0.0796	0.477	0.131	6.73	1.12	0.263	1	-0.138	0.392	0.0663	0.608	-0.197	0.108	-0.163	6.73	-1.25	0.213	-0.0816	0.457	0.228	0.0544
208012_x_at	3431	SP110	-0.155	0.148	-0.34	0.00394	-0.243	0.0246	-0.151	0.147	-0.231	0.0639	-0.0567	0.634	-0.203	0.0672	-0.0458	0.681	-0.115	0.36	-0.236	0.0269	-0.133	6.27	-1.2	0.23	1	-0.242	0.115	-0.0681	0.58	-0.231	0.0485	-0.257	6.27	-2.06	0.0398	-0.195	0.0623	-0.193	0.0881
235129_at	5502	PPP1R1A	0.14	0.248	0.413	0.00205	0.19	0.122	0.236	0.0458	0.0947	0.503	0.252	0.0628	0.0275	0.827	0.356	0.00517	0.0118	0.934	0.0136	0.911	-0.0748	6.17	-0.591	0.555	0.934	0.142	0.415	0.0836	0.55	0.32	0.0161	0.0631	6.17	0.444	0.657	0.0737	0.535	0.211	0.102
227285_at	148523	C1orf51	0.0108	0.911	0.285	0.00727	-0.0139	0.887	-0.0409	0.662	-0.155	0.167	-0.0986	0.358	0.0921	0.358	-0.0356	0.723	-0.0749	0.507	-0.122	0.203	-0.0868	7.17	-0.866	0.387	0.923	0.094	0.496	-0.0718	0.517	-0.015	0.887	-0.0652	7.17	-0.579	0.562	-0.183	0.0528	-0.159	0.119
218149_s_at	55893	ZNF395	0.244	0.0532	-0.381	0.00606	0.224	0.0791	0.0726	0.553	0.0442	0.763	-0.101	0.471	0.16	0.222	0.0655	0.618	0.191	0.195	0.317	0.0118	-0.113	7.11	-0.863	0.388	1	-0.356	0.0489	0.114	0.43	-0.205	0.136	0.0424	7.11	0.288	0.773	0.0909	0.461	0.205	0.124
225403_at	138716	RPP25L	0.108	0.0339	0.145	0.00976	0.0348	0.5	-0.0713	0.15	-0.0309	0.602	0.125	0.0284	-0.00561	0.916	0.0089	0.867	-0.0352	0.555	0.0336	0.509	-0.0577	8.53	-1.09	0.277	0.923	-0.104	0.153	0.0502	0.392	0.00371	0.947	0.0117	8.53	0.196	0.845	0.0698	0.162	0.0816	0.131
231828_at	253039	PSMD5-AS1	0.325	0.103	0.656	0.00283	0.286	0.156	0.247	0.202	0.361	0.119	0.295	0.184	0.67	0.00127	0.444	0.0331	0.543	0.0203	0.198	0.32	0.146	6.15	0.702	0.483	0.923	0.224	0.434	0.344	0.134	0.352	0.106	0.205	6.15	0.878	0.38	-0.232	0.235	0.311	0.14
200887_s_at	6772	STAT1	-0.171	0.491	-0.764	0.00532	-0.323	0.2	-0.322	0.182	-0.547	0.0589	-0.653	0.0186	-0.337	0.192	-0.235	0.365	0.0264	0.928	-0.135	0.587	-0.503	8.15	-1.95	0.0519	1	-0.945	0.00815	-0.622	0.0301	-0.843	0.00196	-0.372	8.15	-1.28	0.201	-0.655	0.00721	-0.387	0.142
212665_at	25976	TIPARP	0.0577	0.692	-0.44	0.00611	0.141	0.34	-0.0315	0.824	-0.0295	0.862	-0.29	0.0742	0.0522	0.73	-0.0579	0.703	-0.0492	0.773	-0.0953	0.513	-0.255	7.82	-1.68	0.0935	1	-0.368	0.0782	0.0792	0.637	-0.273	0.0865	-0.373	7.82	-2.19	0.0289	-0.182	0.201	-0.223	0.148
222220_s_at	55815	TSNAXIP1	0.00785	0.922	0.254	0.00416	-0.164	0.0442	-0.0728	0.351	0.00179	0.985	0.153	0.0883	-0.0765	0.36	-0.052	0.535	-0.0933	0.321	-0.0683	0.395	0.0638	6.73	0.763	0.445	1	0.0106	0.927	-0.0139	0.88	0.212	0.016	-0.0564	6.73	-0.601	0.548	-0.0522	0.506	-0.123	0.148
202362_at	5906	RAP1A	0.19	0.172	-0.412	0.00706	0.246	0.0794	0.155	0.251	-0.0535	0.74	-0.166	0.283	0.136	0.346	0.127	0.381	0.0879	0.588	0.13	0.349	-0.0785	7.74	-0.545	0.586	1	0.138	0.487	0.138	0.388	-0.11	0.468	-0.363	7.74	-2.24	0.0256	-0.314	0.0208	0.209	0.155
219353_at	374354	NHLRC2	0.0364	0.61	-0.219	0.00543	0.0294	0.684	-0.0362	0.601	0.087	0.295	-0.173	0.0294	0.0681	0.359	0.0667	0.371	0.115	0.169	0.138	0.0539	0.019	4.74	0.255	0.798	1	0.0132	0.897	0.0831	0.312	-0.0414	0.595	-0.118	4.74	-1.42	0.157	-0.15	0.0324	0.106	0.16
212402_at	23091	ZC3H13	0.0274	0.843	-0.42	0.00574	-0.0913	0.513	-0.0482	0.719	-0.0177	0.912	-0.239	0.119	0.155	0.281	-0.0805	0.576	0.0977	0.545	-0.00179	0.99	-0.0853	6.72	-0.595	0.552	1	0.00587	0.976	0.389	0.0146	-0.0698	0.643	-0.143	6.72	-0.885	0.377	-0.505	0.000192	-0.204	0.163
203756_at	9828	ARHGEF17	0.014	0.865	0.308	0.000691	-0.0829	0.32	0.0488	0.542	0.112	0.243	0.0668	0.466	0.0337	0.694	0.126	0.143	0.0115	0.905	0.097	0.238	0.0227	8.42	0.265	0.791	1	-0.0249	0.833	0.0534	0.574	0.0915	0.309	0.0367	8.42	0.381	0.703	0.0454	0.573	-0.12	0.168
209782_s_at	1628	DBP	-0.0349	0.701	0.296	0.00306	-0.0303	0.742	-0.0784	0.374	0.106	0.318	0.105	0.3	0.164	0.0831	0.00537	0.955	0.165	0.12	0.00781	0.931	-0.0152	6.32	-0.161	0.872	1	0.087	0.504	0.174	0.0968	0.188	0.0586	0.0452	6.32	0.426	0.67	0.0467	0.598	-0.131	0.171
218510_x_at	54463	FAM134B	-0.0767	0.562	-0.428	0.0033	0.115	0.392	-0.136	0.291	-0.0621	0.686	-0.203	0.169	0.0822	0.55	-0.148	0.282	0.0484	0.755	0.0131	0.921	-0.131	8.17	-0.952	0.342	1	-0.266	0.16	0.125	0.411	-0.456	0.00165	-0.223	8.17	-1.44	0.149	-0.428	0.000974	-0.191	0.172
235987_at	441733	PRKXP1	0.1	0.0999	0.182	0.00681	0.111	0.0714	0.0652	0.272	-0.0157	0.825	0.104	0.126	0.0464	0.464	0.0414	0.515	0.0121	0.866	0.0359	0.555	0.0386	3.96	0.609	0.543	0.934	0.12	0.169	-0.0563	0.423	0.067	0.315	0.0335	3.96	0.47	0.639	0.0898	0.133	0.088	0.173
207184_at	6540	SLC6A13	-0.0426	0.616	0.242	0.00963	-0.0439	0.61	0.00974	0.906	0.0955	0.334	0.182	0.0541	-0.125	0.156	-0.0392	0.658	-0.149	0.133	-0.0445	0.599	0.0684	7.51	0.774	0.439	1	0.124	0.309	0.0523	0.593	0.119	0.2	-0.0295	7.51	-0.297	0.766	0.139	0.094	0.122	0.173
206590_x_at	1813	DRD2	-0.0829	0.371	0.3	0.00333	-0.116	0.215	0.0393	0.663	-0.0411	0.703	0.115	0.265	0.00218	0.982	-0.0409	0.672	-0.179	0.099	0.0425	0.646	0.0436	6.82	0.452	0.651	1	0.0133	0.92	-0.00247	0.982	0.113	0.264	0.139	6.82	1.28	0.201	0.226	0.0129	-0.132	0.179
212334_at	2799	GNS	0.237	0.0528	-0.351	0.00906	0.0331	0.789	0.0564	0.634	0.0829	0.559	-0.109	0.423	0.049	0.699	0.108	0.397	0.0181	0.899	0.129	0.291	-0.0508	6.84	-0.4	0.689	1	0.0899	0.608	-0.0758	0.59	-0.225	0.0913	-0.179	6.84	-1.26	0.21	-0.148	0.214	0.169	0.19
244575_at	23649	POLA2	0.00261	0.967	0.196	0.00554	0.0748	0.248	-0.063	0.311	-0.0694	0.352	0.178	0.0127	-0.114	0.0884	-0.00199	0.976	-0.0869	0.246	0.0152	0.812	0.117	6.01	1.75	0.0799	0.923	0.0495	0.59	0.115	0.119	0.115	0.0996	0.00861	6.01	0.115	0.908	0.0437	0.485	0.0877	0.195
209276_s_at	2745	GLRX	-0.204	0.292	-0.588	0.00591	-0.124	0.525	-0.249	0.185	-0.0608	0.787	-0.0771	0.721	-0.124	0.537	-0.142	0.483	0.202	0.373	-0.0541	0.78	0.0904	7.36	0.449	0.654	1	-0.198	0.476	-0.331	0.138	-0.538	0.0111	-0.0883	7.36	-0.39	0.696	-0.279	0.141	-0.263	0.198
212646_at	23180	RFTN1	0.0818	0.617	-0.486	0.00711	0.0015	0.993	-0.224	0.159	0.0712	0.708	-0.253	0.166	-0.17	0.319	-0.102	0.549	0.15	0.435	-0.0563	0.73	-0.0612	8.06	-0.359	0.719	1	0.084	0.72	-0.271	0.15	-0.677	0.000164	-0.126	8.06	-0.66	0.51	-0.216	0.177	-0.222	0.199
213026_at	9140	ATG12	-0.129	0.389	-0.596	0.000329	-0.00281	0.985	-0.19	0.194	-0.09	0.607	-0.269	0.108	0.0795	0.611	-0.141	0.368	0.351	0.0461	-0.0558	0.71	-0.0525	5.42	-0.336	0.737	1	0.0331	0.878	0.228	0.187	-0.28	0.0881	-0.0782	5.42	-0.446	0.656	-0.424	0.00401	-0.202	0.203
218499_at	51765	MST4	-0.0488	0.398	0.249	9.24e-05	-0.0554	0.343	0.0535	0.34	-0.0447	0.505	-0.00406	0.95	-0.0583	0.331	-0.0631	0.295	-0.101	0.136	0.154	0.00754	-0.0138	4.14	-0.23	0.818	1	-0.00805	0.923	-0.0481	0.469	0.0856	0.175	0.0209	4.14	0.31	0.756	0.149	0.00835	0.0775	0.205
205478_at	5502	PPP1R1A	0.382	0.0199	0.571	0.00155	0.286	0.0845	0.195	0.22	0.312	0.101	0.363	0.0466	0.0237	0.889	0.204	0.233	0.228	0.234	0.189	0.247	-0.0602	7.19	-0.354	0.723	1	0.276	0.24	0.109	0.561	0.482	0.00709	0.128	7.19	0.672	0.502	0.161	0.315	0.219	0.206
213294_at	5610	EIF2AK2	0.242	0.22	-0.621	0.00437	-0.03	0.881	-0.255	0.185	-0.211	0.36	-0.701	0.00151	-0.0147	0.943	0.051	0.805	0.227	0.327	-0.121	0.54	-0.13	7.75	-0.632	0.527	1	-0.225	0.426	-0.169	0.458	-0.599	0.00569	-0.186	7.75	-0.804	0.421	-0.517	0.00763	-0.264	0.206
203882_at	10379	IRF9	-0.159	0.305	-0.495	0.0038	-0.132	0.401	-0.262	0.0822	-0.212	0.241	-0.424	0.0144	0.00515	0.975	-0.0332	0.838	-0.0833	0.647	-0.155	0.317	-0.192	8.83	-1.19	0.234	1	-0.378	0.0892	-0.134	0.452	-0.524	0.00207	-0.414	8.83	-2.28	0.0227	-0.339	0.0255	-0.207	0.207
225711_at	151188	ARL6IP6	0.091	0.131	-0.234	0.00043	0.0561	0.358	0.0312	0.595	0.00137	0.984	-0.0525	0.434	0.0211	0.737	0.032	0.612	-0.0583	0.409	0.024	0.69	-0.0449	4.06	-0.716	0.474	0.923	0.0243	0.779	-0.0834	0.23	0.0142	0.829	-0.0286	4.06	-0.406	0.685	0.0187	0.751	0.0802	0.209
214835_s_at	8801	SUCLG2	0.131	0.23	-0.341	0.00474	0.00764	0.945	0.087	0.413	-0.0123	0.923	-0.258	0.0343	0.0899	0.429	0.115	0.313	-0.0847	0.509	0.0194	0.859	-0.118	4.7	-1.03	0.301	1	-0.0379	0.809	0.109	0.388	-0.195	0.103	-0.223	4.7	-1.75	0.0813	-0.107	0.319	0.135	0.244
203964_at	9111	NMI	-0.284	0.035	-0.422	0.00445	-0.205	0.132	-0.146	0.264	-0.337	0.0314	-0.319	0.0333	-0.11	0.434	-0.215	0.126	-0.125	0.429	-0.0268	0.842	-0.0103	4.87	-0.0738	0.941	1	-0.184	0.341	-0.157	0.311	-0.431	0.00346	-0.177	4.87	-1.13	0.259	-0.109	0.408	-0.164	0.25
203535_at	6280	S100A9	-0.328	0.269	-0.962	0.00326	-0.0804	0.789	-0.291	0.313	-0.418	0.226	-0.261	0.429	-0.311	0.313	-0.405	0.191	-0.38	0.275	-0.0892	0.763	-0.233	5.65	-0.756	0.45	1	-0.442	0.298	-0.503	0.141	-0.81	0.0126	-0.695	5.65	-2.01	0.0453	-0.113	0.698	-0.36	0.252
223660_at	140	ADORA3	-0.291	0.0509	-0.469	0.00425	-0.159	0.291	-0.163	0.261	-0.351	0.0429	-0.105	0.527	0.0291	0.851	-0.14	0.367	-0.247	0.157	-0.324	0.0294	-0.225	7.14	-1.45	0.147	0.923	-0.281	0.189	-0.442	0.0101	-0.391	0.0163	-0.437	7.14	-2.51	0.0122	-0.346	0.0175	-0.178	0.258
214718_at	57798	GATAD1	-0.264	0.0213	-0.384	0.00235	-0.0957	0.409	-0.229	0.0398	-0.0966	0.469	-0.452	0.000418	0.0714	0.549	-0.143	0.233	0.128	0.341	-0.116	0.309	-0.0399	6.11	-0.335	0.738	1	-0.0694	0.673	0.413	0.00181	-0.0599	0.632	0.104	6.11	0.78	0.436	-0.273	0.0149	-0.135	0.267
200663_at	967	CD63	0.0499	0.631	-0.334	0.0036	0.0507	0.629	0.0705	0.485	-0.0203	0.867	-0.0142	0.902	0.157	0.147	0.0562	0.604	-0.0645	0.596	0.112	0.281	-0.0825	10	-0.763	0.446	1	-0.111	0.455	0.0657	0.583	-0.285	0.0121	-0.261	10	-2.15	0.0318	-0.0529	0.602	0.119	0.279
225973_at	6891	TAP2	-0.154	0.297	-0.512	0.00168	-0.189	0.206	-0.127	0.375	-0.166	0.333	-0.374	0.0233	0.2	0.193	-0.00714	0.963	0.0131	0.939	-0.162	0.271	-0.0553	6.58	-0.36	0.719	0.961	-0.0963	0.649	-0.318	0.0619	-0.423	0.00892	-0.266	6.58	-1.54	0.124	-0.237	0.101	-0.168	0.282
221653_x_at	23780	APOL2	-0.15	0.236	-0.389	0.00546	-0.0166	0.897	-0.202	0.101	-0.275	0.0635	-0.162	0.254	-0.166	0.21	-0.132	0.321	0.222	0.136	0.108	0.394	-0.176	7.25	-1.33	0.183	1	-0.334	0.0671	-0.355	0.0155	-0.346	0.0129	0.0893	7.25	0.602	0.548	0.105	0.398	-0.143	0.286
214022_s_at	8519	IFITM1	-0.411	0.0911	-0.841	0.00173	-0.195	0.428	-0.128	0.587	-0.334	0.237	-0.378	0.163	-0.282	0.265	-0.288	0.256	-0.321	0.259	-0.32	0.188	-0.357	9.18	-1.41	0.159	1	-0.623	0.0743	-0.487	0.0823	-0.754	0.00463	-0.651	9.18	-2.29	0.0223	-0.304	0.201	-0.272	0.29
231882_at	642477	FLJ39632	0.00316	0.962	-0.198	0.00708	-0.0727	0.283	0.0743	0.253	-0.0334	0.668	-0.012	0.872	-0.113	0.104	-0.0349	0.617	-0.135	0.0856	0.000486	0.994	0.0139	7.45	0.2	0.841	0.979	-0.0899	0.349	-0.0275	0.721	0.168	0.022	-0.0171	7.45	-0.219	0.827	0.00925	0.888	0.0739	0.296
218379_at	10179	RBM7	0.034	0.652	-0.214	0.00989	0.0305	0.689	0.0759	0.299	-0.0808	0.356	-0.0884	0.292	0.0117	0.881	0.113	0.15	0.00968	0.913	0.0629	0.403	0.0769	6.15	0.982	0.326	1	0.0907	0.401	0.102	0.239	-0.00102	0.99	-0.0582	6.15	-0.661	0.509	-0.198	0.00727	0.083	0.297
218166_s_at	51773	RSF1	0.0103	0.849	-0.176	0.00304	-0.00585	0.915	0.0739	0.159	0.00728	0.908	-0.184	0.00225	-0.00565	0.92	0.0537	0.34	0.0389	0.538	0.102	0.0579	0.0054	4.62	0.0962	0.923	1	-0.024	0.756	0.11	0.0775	-0.00165	0.978	0.117	4.62	1.85	0.0649	-0.00262	0.96	0.0594	0.298
223729_at	27443	CECR2	0.0177	0.757	0.24	0.000158	-0.0613	0.291	-0.0685	0.219	-0.142	0.0332	0.0317	0.619	-0.102	0.0881	-0.0646	0.281	0.0185	0.783	0.00758	0.895	0.109	6.03	1.83	0.0684	0.923	0.036	0.661	0.0763	0.248	0.0161	0.797	-0.0631	6.03	-0.94	0.347	-0.0471	0.401	0.0629	0.3
202270_at	2633	GBP1	-0.37	0.165	-0.793	0.007	-0.355	0.188	-0.294	0.257	-0.723	0.02	-0.511	0.0857	-0.234	0.399	-0.281	0.313	-0.216	0.49	-0.235	0.379	-0.227	4.23	-0.819	0.413	1	-0.66	0.0846	-0.633	0.0395	-0.733	0.0121	-0.432	4.23	-1.39	0.166	-0.141	0.588	-0.291	0.302
233644_at	83473	KATNAL2	-0.0135	0.834	0.193	0.00667	0.163	0.0124	-0.000628	0.992	-0.0707	0.347	0.171	0.0176	-0.0767	0.253	-0.0844	0.21	-0.0411	0.586	0.0582	0.366	-0.0104	4.47	-0.155	0.877	0.982	-0.000368	0.997	0.112	0.133	0.0516	0.464	0.0225	4.47	0.298	0.766	0.0635	0.314	-0.0681	0.318
201445_at	1266	CNN3	0.106	0.752	-1.04	0.00519	-0.199	0.56	-0.0765	0.815	-0.218	0.578	-0.36	0.337	0.112	0.749	-0.0837	0.812	0.0702	0.858	-0.366	0.275	-0.26	7.77	-0.744	0.457	1	-0.348	0.47	0.58	0.135	-0.795	0.0307	-0.754	7.77	-1.92	0.0554	-0.454	0.168	-0.354	0.32
204900_x_at	8819	SAP30	0.242	0.0713	-0.47	0.00151	0.256	0.0599	0.0181	0.89	-0.0768	0.623	-0.265	0.0767	0.137	0.325	0.048	0.732	0.12	0.444	0.166	0.215	-0.187	5.48	-1.34	0.182	1	-0.0191	0.921	-0.0303	0.845	-0.286	0.0513	-0.155	5.48	-0.989	0.323	-0.241	0.0663	0.14	0.325
205016_at	7039	TGFA	-0.00681	0.954	-0.346	0.00851	0.0727	0.547	0.101	0.385	-0.174	0.209	-0.156	0.239	0.0415	0.737	-0.0056	0.964	-0.081	0.562	0.0178	0.881	-0.165	7.01	-1.33	0.184	1	-0.0499	0.77	0.0748	0.586	-0.0644	0.621	-0.182	7.01	-1.31	0.191	-0.286	0.0143	0.124	0.327
209275_s_at	1201	CLN3	-0.148	0.086	0.251	0.0082	0.0544	0.533	-0.0004	0.996	0.147	0.145	0.257	0.00768	0.0265	0.768	0.0489	0.587	-0.0494	0.625	-0.0432	0.616	0.0187	7.06	0.208	0.835	1	0.118	0.34	0.013	0.896	0.103	0.276	0.185	7.06	1.84	0.0668	0.00257	0.976	-0.0888	0.331
230320_at	84897	TBRG1	0.0311	0.764	0.306	0.00736	-0.0108	0.918	0.0123	0.903	0.0126	0.916	-0.0652	0.571	0.169	0.117	-0.0663	0.539	0.194	0.11	0.0244	0.813	-0.185	7.26	-1.72	0.0857	0.923	-0.187	0.207	-0.0868	0.466	0.103	0.364	0.00124	7.26	0.0103	0.992	-0.204	0.0437	-0.106	0.333
243556_at	25791	NGEF	-0.255	0.066	0.504	0.000995	0.0262	0.852	-0.361	0.0076	-0.0171	0.915	0.18	0.244	-0.191	0.186	-0.0464	0.749	0.173	0.286	-0.0396	0.775	0.152	4.96	1.05	0.293	0.923	-0.157	0.43	0.229	0.152	0.218	0.151	0.329	4.96	2.03	0.0429	-0.16	0.239	-0.141	0.335
221652_s_at	55726	ASUN	0.142	0.162	-0.329	0.00315	0.193	0.0599	0.0691	0.482	-0.0318	0.787	-0.202	0.0738	0.22	0.0371	0.109	0.302	0.108	0.361	0.119	0.24	0.0552	5.34	0.524	0.6	1	-0.0132	0.928	0.101	0.384	-0.0742	0.502	-0.0642	5.34	-0.543	0.587	-0.233	0.019	0.102	0.341
209091_s_at	51100	SH3GLB1	-0.178	0.161	-0.387	0.00566	-0.22	0.0863	-0.112	0.365	-0.0527	0.721	-0.144	0.309	-0.00645	0.961	-0.06	0.65	-0.0139	0.925	-0.0243	0.848	-0.152	6.76	-1.15	0.25	1	-0.0257	0.888	0.253	0.0842	-0.331	0.0173	-0.323	6.76	-2.18	0.0298	-0.246	0.0472	-0.127	0.343
222243_s_at	10766	TOB2	0.0804	0.58	-0.59	0.000236	0.309	0.0359	0.112	0.428	0.129	0.446	-0.378	0.0197	0.233	0.122	0.0959	0.527	0.0286	0.866	0.337	0.0202	-0.0562	7.1	-0.372	0.71	1	-0.117	0.573	0.197	0.239	-0.053	0.738	-0.232	7.1	-1.37	0.171	-0.328	0.021	0.143	0.352
202269_x_at	2633	GBP1	-0.478	0.065	-0.841	0.00324	-0.586	0.0255	-0.37	0.142	-0.968	0.00137	-0.482	0.0953	-0.131	0.626	-0.206	0.447	-0.0687	0.821	-0.211	0.414	-0.25	4.71	-0.928	0.353	1	-1.01	0.00692	-0.406	0.173	-0.988	0.000508	-0.299	4.71	-0.99	0.323	-0.313	0.216	-0.253	0.355
244294_at	404672	GTF2H5	0.0642	0.488	0.282	0.00574	-0.0385	0.682	0.000186	0.998	0.114	0.291	-0.249	0.016	0.178	0.0643	-0.0681	0.482	0.11	0.311	-0.00997	0.914	-0.108	6.67	-1.12	0.264	0.923	0.0266	0.841	-0.126	0.239	-0.0544	0.591	-0.0849	6.67	-0.783	0.434	-0.125	0.168	0.0902	0.358
213293_s_at	10346	TRIM22	-0.162	0.449	-0.621	0.00831	-0.364	0.093	-0.221	0.287	-0.53	0.0331	-0.606	0.011	0.0186	0.933	0.0177	0.937	-0.0857	0.732	0.0252	0.906	-0.117	7.22	-0.524	0.6	1	-0.449	0.143	-0.167	0.498	-0.664	0.00454	-0.469	7.22	-1.88	0.0608	-0.321	0.125	-0.206	0.361
224772_at	89796	NAV1	0.053	0.694	-0.39	0.00884	0.0329	0.81	0.034	0.795	0.151	0.337	-0.235	0.119	0.322	0.022	-0.00397	0.978	0.208	0.188	-0.0497	0.712	-0.166	8.31	-1.18	0.237	0.923	-0.176	0.362	0.145	0.35	-0.262	0.0758	-0.269	8.31	-1.7	0.0893	-0.207	0.117	-0.129	0.367
208707_at	1983	EIF5	0.00611	0.944	0.294	0.00224	-0.0707	0.423	-0.12	0.155	0.021	0.836	0.0183	0.85	0.081	0.372	-0.0758	0.405	0.00778	0.939	0.0218	0.802	-0.0339	6.96	-0.373	0.709	1	-0.0773	0.536	-0.0354	0.724	0.058	0.543	-0.111	6.96	-1.09	0.276	-0.143	0.0942	-0.0829	0.368
202912_at	133	ADM	-0.418	0.169	-0.916	0.00611	-0.144	0.638	-0.243	0.41	-0.581	0.0999	-0.407	0.228	-0.197	0.531	-0.387	0.221	-0.09	0.8	-0.0484	0.873	-0.545	6.42	-1.73	0.0843	1	-0.709	0.103	-0.698	0.0458	-0.863	0.00932	-0.815	6.42	-2.3	0.0217	-0.112	0.704	-0.287	0.372
212970_at	323	APBB2	0.0526	0.58	-0.308	0.00333	0.089	0.355	-0.0379	0.682	-0.086	0.437	-0.0951	0.369	0.0204	0.837	0.0656	0.509	-0.0826	0.458	-0.0821	0.387	-0.148	7.49	-1.5	0.135	1	-0.141	0.302	0.0511	0.641	-0.0777	0.455	-0.182	7.49	-1.64	0.101	-0.079	0.396	0.0868	0.388
204161_s_at	22875	ENPP4	0.0955	0.398	-0.367	0.00322	0.106	0.353	-0.0424	0.7	0.0596	0.65	-0.364	0.00393	0.122	0.301	0.0798	0.499	0.158	0.234	0.0622	0.582	-0.0194	5.28	-0.164	0.869	1	0.0264	0.871	0.194	0.136	-0.198	0.11	-0.092	5.28	-0.696	0.487	-0.353	0.00145	0.102	0.394
208374_s_at	829	CAPZA1	0.19	0.2	-0.483	0.00313	0.0563	0.707	-0.0567	0.694	-0.209	0.226	-0.352	0.033	-0.00701	0.964	-0.106	0.494	0.0447	0.797	-0.02	0.893	-0.141	7.59	-0.913	0.362	1	-0.155	0.464	-0.204	0.231	-0.392	0.0156	-0.377	7.59	-2.18	0.0296	-0.435	0.00274	-0.133	0.396
230183_at	2131	EXT1	-0.0346	0.624	-0.222	0.00433	0.043	0.547	-0.0286	0.677	0.000506	0.995	-0.0183	0.816	-0.102	0.166	0.00459	0.95	-0.0318	0.701	-0.0969	0.17	0.000728	4.92	0.00991	0.992	0.998	-0.0608	0.548	-0.0528	0.516	0.0929	0.229	-0.0533	4.92	-0.646	0.519	-0.0361	0.601	0.0626	0.402
213233_s_at	55958	KLHL9	0.111	0.303	-0.388	0.00109	0.0962	0.378	-0.132	0.207	-0.133	0.288	-0.184	0.125	-0.0508	0.65	0.0502	0.655	0.0367	0.771	-0.0921	0.392	-0.187	8.69	-1.67	0.0956	1	-0.000967	0.995	-0.0304	0.807	-0.292	0.0133	-0.274	8.69	-2.17	0.0301	-0.165	0.118	-0.0952	0.403
219607_s_at	51338	MS4A4A	-0.161	0.135	-0.384	0.0012	-0.122	0.262	-0.048	0.645	-0.255	0.0418	-0.192	0.109	-0.0863	0.44	-0.0999	0.373	-0.151	0.231	0.0275	0.798	-0.0382	4.06	-0.341	0.733	1	-0.126	0.414	-0.176	0.156	-0.387	0.00102	-0.22	4.06	-1.75	0.0808	-0.0794	0.45	-0.0937	0.41
200986_at	710	SERPING1	-0.218	0.235	-0.645	0.00143	-0.259	0.163	-0.114	0.523	-0.482	0.024	-0.387	0.0582	-0.125	0.513	-0.13	0.496	-0.239	0.265	0.0357	0.845	-0.22	6.97	-1.15	0.249	1	-0.435	0.0982	-0.289	0.171	-0.644	0.00137	-0.334	6.97	-1.56	0.12	-0.176	0.325	-0.16	0.41
205876_at	3977	LIFR	-0.00485	0.919	-0.162	0.00199	0.0609	0.206	0.0543	0.24	-0.0521	0.346	-0.036	0.496	0.0553	0.263	0.00327	0.947	-0.0109	0.845	0.0785	0.0984	-0.061	4.3	-1.23	0.218	1	0.0255	0.708	0.0574	0.294	-0.0431	0.406	-0.0359	4.3	-0.647	0.518	-0.0663	0.154	0.0412	0.412
219326_s_at	10678	B3GNT2	-0.0799	0.366	0.263	0.00692	-0.183	0.0407	0.0644	0.453	-0.0847	0.41	0.143	0.146	-0.057	0.535	0.0639	0.489	-0.247	0.0174	-0.122	0.166	-0.0641	6.16	-0.697	0.486	1	0.115	0.363	0.156	0.126	0.135	0.163	-0.102	6.16	-0.985	0.325	0.0315	0.715	0.0764	0.414
212815_at	10973	ASCC3	0.091	0.194	-0.259	0.000798	-0.133	0.0598	-0.0127	0.852	0.00612	0.94	-0.0998	0.201	0.000924	0.99	0.0178	0.808	-0.0724	0.377	0.0164	0.814	-0.0861	5.65	-1.18	0.238	1	0.074	0.461	-0.019	0.814	-0.0705	0.357	-0.207	5.65	-2.53	0.0115	-0.303	1.07e-05	0.0603	0.415
221553_at	84061	MAGT1	-0.134	0.145	-0.414	4.66e-05	-0.0667	0.474	-0.0451	0.614	-0.226	0.035	-0.318	0.00194	0.00636	0.947	-0.131	0.171	0.00428	0.968	0.0121	0.895	-0.184	4.51	-1.93	0.0543	1	-0.0527	0.689	0.211	0.0465	-0.198	0.0492	-0.14	4.51	-1.3	0.194	-0.207	0.0215	-0.0791	0.416
217106_x_at	27292	DIMT1	0.129	0.225	-0.338	0.00395	-0.0203	0.85	0.0382	0.711	-0.0859	0.487	-0.298	0.012	0.0928	0.401	0.104	0.348	0.0571	0.646	0.0793	0.454	-0.139	7.23	-1.26	0.209	1	0.0473	0.756	0.301	0.0139	-0.0793	0.494	-0.116	7.23	-0.934	0.351	-0.254	0.0145	0.0913	0.417
201649_at	9246	UBE2L6	0.0124	0.929	-0.448	0.00351	-0.132	0.35	-0.0997	0.461	-0.289	0.0747	-0.152	0.326	-0.0491	0.734	-0.0705	0.627	-0.152	0.352	-0.0654	0.638	-0.162	8.21	-1.12	0.263	1	-0.545	0.00648	-0.32	0.0462	-0.493	0.00124	-0.123	8.21	-0.758	0.449	-0.0902	0.507	-0.117	0.427
210163_at	6373	CXCL11	-0.17	0.116	-0.347	0.00358	-0.0837	0.443	-0.131	0.212	-0.307	0.0147	-0.0668	0.578	-0.0603	0.591	-0.0838	0.457	-0.0907	0.473	-0.0937	0.385	-0.125	3.83	-1.11	0.266	1	-0.146	0.345	-0.251	0.0435	-0.308	0.00922	-0.103	3.83	-0.815	0.415	0.144	0.172	-0.0906	0.427
212812_at	256987	SERINC5	0.0951	0.483	-0.409	0.0062	0.29	0.0346	0.104	0.428	-0.0726	0.645	-0.155	0.304	0.269	0.0565	0.179	0.206	0.00731	0.963	0.0891	0.51	-0.228	8.03	-1.62	0.106	1	-0.0781	0.688	0.153	0.327	-0.157	0.291	-0.15	8.03	-0.947	0.344	-0.252	0.0572	0.113	0.43
211048_s_at	9601	PDIA4	0.0616	0.512	-0.333	0.0013	0.112	0.238	-0.0611	0.503	-0.00665	0.951	-0.0204	0.846	0.12	0.22	0.116	0.235	0.147	0.181	0.111	0.237	-0.132	5.95	-1.36	0.176	1	-0.12	0.373	-0.0612	0.571	-0.193	0.0601	-0.11	5.95	-1	0.317	0.00936	0.919	-0.0775	0.435
202853_s_at	6259	RYK	0.0663	0.359	-0.212	0.00768	-0.0219	0.765	0.0588	0.403	0.0941	0.263	-0.112	0.164	0.135	0.0735	0.122	0.105	0.0373	0.659	0.138	0.0566	0.0194	6.64	0.258	0.797	1	0.00816	0.937	0.0939	0.259	-0.0747	0.344	0.0502	6.64	0.595	0.552	-0.102	0.15	0.0595	0.436
209239_at	4790	NFKB1	0.0768	0.316	0.224	0.00787	0.00807	0.917	0.1	0.178	0.145	0.103	0.24	0.00498	0.0533	0.503	-0.015	0.851	-0.0734	0.413	-0.0479	0.53	0.0458	6.7	0.576	0.565	1	0.0823	0.453	0.0667	0.449	0.14	0.0947	0.0474	6.7	0.53	0.596	0.112	0.135	0.0619	0.444
223427_s_at	54566	EPB41L4B	0.0534	0.397	-0.193	0.00554	0.0415	0.516	0.0222	0.717	0.0566	0.44	0.186	0.00823	-0.282	1.9e-05	0.0368	0.576	-0.0522	0.48	-0.00363	0.954	0.0982	3.88	1.5	0.135	0.923	-0.086	0.342	-0.0663	0.362	0.0438	0.525	0.0393	3.88	0.533	0.594	0.0812	0.188	0.0508	0.447
210735_s_at	771	CA12	-0.143	0.333	0.561	0.00057	-0.155	0.3	0.089	0.534	0.137	0.423	0.173	0.293	-0.14	0.362	-0.127	0.409	0.00753	0.965	0.173	0.241	0.0885	6.23	0.577	0.564	1	0.165	0.436	-0.000523	0.998	0.208	0.196	0.184	6.23	1.07	0.285	0.191	0.184	0.118	0.448
202666_s_at	86	ACTL6A	0.0966	0.161	-0.2	0.00853	0.109	0.118	0.0942	0.159	0.113	0.157	-0.16	0.037	0.0746	0.297	0.0731	0.309	0.00293	0.971	0.161	0.0196	-0.0161	4.04	-0.225	0.822	1	0.0282	0.775	0.123	0.12	-0.0188	0.802	-0.0912	4.04	-1.13	0.258	-0.0285	0.672	0.055	0.45
200733_s_at	7803	PTP4A1	0.0541	0.684	-0.398	0.00659	0.187	0.163	-0.198	0.124	-0.0192	0.901	-0.322	0.0298	0.109	0.428	-0.135	0.331	0.197	0.205	0.0605	0.648	-0.0682	5.3	-0.494	0.622	1	-0.139	0.466	0.0442	0.773	-0.346	0.0174	-0.137	5.3	-0.883	0.378	-0.145	0.265	-0.102	0.466
240037_at	150771	ITPRIPL1	0.0279	0.687	0.307	6.21e-05	-0.0417	0.553	0.0423	0.53	0.0405	0.616	-0.0582	0.452	-0.0442	0.54	-0.0219	0.762	-0.178	0.0288	0.00701	0.919	0.0302	6.32	0.418	0.676	0.956	0.078	0.433	-0.119	0.138	0.115	0.131	-0.0637	6.32	-0.786	0.432	0.0142	0.835	-0.0535	0.466
204363_at	2152	F3	-0.297	0.304	-0.872	0.00614	-0.315	0.282	-0.399	0.155	-0.00832	0.98	-0.513	0.111	-0.351	0.242	-0.368	0.222	-0.28	0.407	-0.336	0.244	-0.353	7.66	-1.17	0.241	1	-0.0872	0.833	0.097	0.771	-0.612	0.0527	-0.528	7.66	-1.56	0.118	-0.318	0.259	-0.222	0.468
239377_at	84285	EIF1AD	0.136	0.118	-0.247	0.0098	0.145	0.0983	0.0871	0.301	0.128	0.203	0.12	0.213	0.0931	0.302	0.15	0.0968	0.122	0.228	0.151	0.0818	-0.0412	6.36	-0.456	0.648	0.952	-0.112	0.37	-0.0461	0.645	0.0356	0.707	-0.144	6.36	-1.42	0.157	-0.0529	0.533	-0.066	0.472
211479_s_at	3358	HTR2C	-0.0446	0.658	0.365	0.00101	-0.0705	0.488	0.111	0.255	0.0056	0.962	0.0479	0.669	-0.0675	0.518	0.00345	0.974	-0.052	0.659	0.0334	0.74	0.0749	4.25	0.716	0.474	1	0.0743	0.606	0.0677	0.559	0.0551	0.616	0.0686	4.25	0.584	0.56	0.154	0.117	0.076	0.475
227875_at	90293	KLHL13	0.0983	0.478	0.557	0.00027	0.0073	0.958	0.172	0.201	0.0435	0.787	-0.0185	0.904	0.0676	0.638	0.0521	0.718	0.0291	0.858	0.189	0.172	-0.0794	4.08	-0.551	0.581	0.938	0.192	0.334	0.115	0.472	0.0523	0.729	-0.0248	4.08	-0.153	0.878	0.0713	0.598	0.104	0.476
201673_s_at	2997	GYS1	-0.0921	0.244	-0.335	0.000125	-0.246	0.00221	0.0163	0.832	-0.168	0.0689	-0.0809	0.358	-0.173	0.0355	-0.115	0.162	-0.129	0.164	-0.163	0.0398	-0.143	7.06	-1.74	0.0828	1	-0.108	0.343	-0.11	0.229	-0.272	0.00168	-0.0618	7.06	-0.668	0.504	-0.2	0.00998	-0.0588	0.482
204422_s_at	2247	FGF2	0.174	0.361	-0.546	0.00912	0.0119	0.951	-0.114	0.535	0.232	0.295	-0.538	0.0111	-0.0679	0.731	-0.109	0.581	-0.081	0.716	0.00819	0.966	-0.0664	5.73	-0.336	0.737	1	0.00195	0.994	0.158	0.469	-0.329	0.114	-0.293	5.73	-1.32	0.187	-0.122	0.512	-0.14	0.487
210145_at	5321	PLA2G4A	-0.0522	0.177	-0.125	0.00352	0.00464	0.906	0.00291	0.938	-0.0335	0.457	-0.072	0.0953	-0.0444	0.27	-0.0848	0.0361	-0.026	0.566	0.0404	0.295	-0.012	3.87	-0.297	0.766	1	0.0225	0.685	-0.0217	0.627	-0.0519	0.219	-0.0207	3.87	-0.457	0.648	-0.00776	0.838	0.0285	0.487
201999_s_at	6993	DYNLT1	0.153	0.331	-0.529	0.00234	0.213	0.181	0.145	0.345	-0.103	0.573	-0.0262	0.881	0.149	0.362	0.138	0.4	0.131	0.479	0.207	0.188	-0.194	7.36	-1.19	0.236	1	0.0782	0.729	0.0731	0.687	-0.423	0.0142	-0.389	7.36	-2.11	0.0349	-0.0448	0.771	0.114	0.493
204212_at	10005	ACOT8	0.0727	0.44	0.305	0.00332	0.0448	0.638	0.0516	0.573	0.0118	0.914	0.0183	0.861	0.0167	0.864	0.0987	0.314	0.0832	0.45	-0.0338	0.719	0.102	6.43	1.04	0.297	1	0.158	0.243	0.0266	0.806	0.00504	0.961	0.206	6.43	1.87	0.0616	0.0826	0.369	-0.0674	0.498
202816_s_at	6760	SS18	-0.0266	0.756	-0.285	0.00253	-0.0762	0.38	-0.0209	0.801	-0.0049	0.961	-0.0041	0.966	0.188	0.0348	-0.0984	0.271	0.0406	0.686	-0.0955	0.264	0.0221	4.75	0.248	0.804	1	-0.00137	0.991	0.214	0.0303	-0.0586	0.531	-0.0745	4.75	-0.744	0.457	-0.147	0.08	-0.0603	0.506
201269_s_at	23386	NUDCD3	-0.0602	0.303	0.209	0.00118	-0.0989	0.0946	0.067	0.238	0.0495	0.467	0.0523	0.421	-0.0904	0.137	0.0459	0.452	-0.103	0.133	0.0156	0.789	-0.043	6.77	-0.707	0.48	1	-0.0609	0.467	0.0224	0.739	0.0932	0.145	0.0217	6.77	0.317	0.751	0.0883	0.123	-0.0403	0.514
201656_at	3655	ITGA6	0.153	0.0948	-0.262	0.00931	0.0808	0.384	-0.0416	0.64	-0.0087	0.935	-0.157	0.124	0.0221	0.816	0.0565	0.554	-0.0953	0.374	0.081	0.376	-0.086	5.3	-0.903	0.367	1	0.0319	0.808	0.0871	0.409	-0.119	0.235	-0.17	5.3	-1.59	0.112	-0.132	0.141	0.0631	0.515
219703_at	55329	MNS1	0.00175	0.975	-0.286	5.15e-06	-0.0302	0.599	0.0638	0.247	0.00588	0.929	-0.0636	0.314	-0.0655	0.267	0.0198	0.738	-0.0665	0.316	0.166	0.00352	-0.0445	4.46	-0.754	0.451	1	-0.0923	0.257	-0.035	0.592	-0.0743	0.23	-0.0385	4.46	-0.581	0.561	-0.0445	0.422	0.0386	0.52
203595_s_at	24138	IFIT5	-0.118	0.308	-0.491	0.000123	-0.147	0.209	-0.119	0.289	-0.242	0.0724	-0.436	0.000746	-0.114	0.341	0.0016	0.989	0.0721	0.595	-0.0339	0.769	-0.0952	7.3	-0.791	0.429	1	-0.197	0.235	-0.101	0.446	-0.447	0.000434	-0.205	7.3	-1.52	0.13	-0.311	0.00608	-0.0778	0.525
211184_s_at	10083	USH1C	-0.0931	0.427	-0.365	0.00477	0.186	0.118	0.142	0.214	-0.201	0.142	0.0584	0.655	-0.0219	0.858	-0.121	0.324	-0.235	0.088	0.0909	0.438	-0.205	6.44	-1.68	0.0943	1	0.00458	0.978	-0.0943	0.485	0.0711	0.579	-0.18	6.44	-1.31	0.191	-0.0853	0.457	0.0778	0.531
207467_x_at	831	CAST	0.0899	0.48	-0.421	0.00271	-0.0529	0.681	0.0811	0.512	0.0733	0.621	-0.0601	0.672	0.122	0.355	0.103	0.44	0.156	0.296	0.217	0.0882	-0.0195	6.85	-0.148	0.883	1	0.0554	0.761	0.256	0.0806	-0.0908	0.513	-0.00504	6.85	-0.0339	0.973	-0.411	0.000992	0.0827	0.539
201324_at	2012	EMP1	-0.00593	0.977	-0.684	0.0024	0.141	0.496	0.0409	0.837	-0.165	0.487	-0.056	0.806	0.208	0.328	0.136	0.522	-0.0743	0.756	0.256	0.209	0.0088	4.38	0.0414	0.967	1	-0.0888	0.762	0.165	0.483	-0.562	0.012	-0.353	4.38	-1.48	0.139	-0.022	0.912	-0.132	0.54
202817_s_at	6760	SS18	-0.0124	0.889	-0.356	0.000291	-0.0167	0.853	0.0117	0.892	-0.093	0.369	-0.179	0.0719	0.14	0.13	-0.00769	0.934	0.0707	0.498	0.0349	0.695	-0.00289	4.27	-0.0312	0.975	1	-0.0272	0.831	0.214	0.0374	-0.124	0.203	0.0203	4.27	0.195	0.845	-0.161	0.0644	-0.0573	0.543
214525_x_at	27030	MLH3	0.0812	0.25	0.213	0.0062	0.0379	0.596	0.103	0.134	0.0678	0.409	0.168	0.0335	0.0135	0.854	-0.0582	0.43	0.00662	0.936	-0.121	0.0871	0.169	5.41	2.3	0.0215	1	0.165	0.104	0.00187	0.982	0.191	0.0135	0.0183	5.41	0.222	0.824	0.0758	0.273	0.045	0.547
220330_s_at	64092	SAMSN1	-0.105	0.281	-0.322	0.00273	-0.0827	0.402	-0.0819	0.388	-0.389	0.000633	-0.293	0.00711	-0.0379	0.709	-0.0918	0.367	-0.0588	0.607	0.0372	0.703	-0.0647	4.1	-0.637	0.524	1	-0.0269	0.848	-0.227	0.0439	-0.282	0.00831	-0.209	4.1	-1.83	0.0671	-0.15	0.115	0.0616	0.551
205552_s_at	4938	OAS1	-0.258	0.108	-0.5	0.00479	-0.313	0.0546	-0.154	0.323	-0.453	0.0156	-0.245	0.171	-0.0871	0.602	-0.0645	0.7	0.000873	0.996	-0.126	0.433	-0.105	4.69	-0.63	0.529	1	-0.578	0.0123	-0.424	0.0223	-0.449	0.0107	-0.0802	4.69	-0.427	0.669	-0.0274	0.862	-0.101	0.554
202303_x_at	8467	SMARCA5	0.124	0.233	-0.314	0.00601	-0.0166	0.874	-0.0199	0.844	0.0266	0.825	-0.122	0.291	0.0767	0.477	0.034	0.754	0.0797	0.512	0.151	0.147	-0.0997	6.42	-0.923	0.356	1	0.00405	0.978	0.204	0.0887	-0.166	0.143	-0.125	6.42	-1.03	0.304	-0.364	0.000359	-0.0644	0.558
214315_x_at	811	CALR	-0.237	0.193	-0.523	0.009	-0.0465	0.801	-0.172	0.329	-0.122	0.563	-0.555	0.00629	-0.0254	0.893	-0.174	0.359	-0.215	0.314	0.0563	0.756	-0.248	7.93	-1.31	0.19	1	-0.184	0.479	0.0983	0.639	-0.659	0.00095	-0.275	7.93	-1.29	0.197	-0.486	0.00636	-0.111	0.565
202664_at	7456	WIPF1	-0.0058	0.976	-0.596	0.00462	0.326	0.092	-0.0513	0.782	-0.347	0.118	-0.333	0.118	0.0554	0.78	-0.137	0.493	-0.216	0.333	-0.0685	0.719	-0.437	5.66	-2.2	0.0281	1	-0.18	0.511	-0.0958	0.663	-0.219	0.294	-0.354	5.66	-1.59	0.113	-0.54	0.00394	-0.116	0.567
233471_at	84867	PTPN5	-0.225	0.274	0.826	0.000274	-0.0592	0.776	-0.282	0.158	0.209	0.383	0.264	0.249	0.0031	0.988	-0.129	0.546	0.142	0.554	0.012	0.953	-0.0361	5.52	-0.169	0.866	0.98	-0.272	0.356	0.341	0.149	0.574	0.0108	0.235	5.52	0.98	0.327	-0.157	0.434	-0.124	0.568
201450_s_at	7072	TIA1	-0.014	0.869	-0.288	0.00204	0.0169	0.843	-0.0604	0.463	0.0295	0.764	-0.161	0.0876	0.0717	0.415	0.0648	0.464	0.116	0.245	0.0125	0.883	-0.0412	4.99	-0.468	0.64	1	0.0637	0.6	0.197	0.0437	-0.153	0.0997	-0.0716	4.99	-0.723	0.47	-0.236	0.00443	-0.0508	0.571
210611_s_at	1837	DTNA	-0.313	0.34	-0.97	0.00727	-0.368	0.267	-0.253	0.427	0.168	0.659	-0.425	0.244	-0.00779	0.982	0.0594	0.862	0.0036	0.993	0.00891	0.978	-0.0707	7.83	-0.207	0.836	1	-0.181	0.7	0.102	0.788	-0.608	0.0896	-0.31	7.83	-0.81	0.418	-0.537	0.094	-0.194	0.576
205739_x_at	51427	ZNF107	0.00438	0.93	-0.152	0.00567	0.00453	0.928	0.0314	0.516	-0.0557	0.336	-0.159	0.00416	-0.0848	0.102	-0.0468	0.368	-0.00377	0.948	0.0923	0.0635	0.0203	4	0.392	0.695	1	0.0141	0.843	0.0279	0.626	0.0132	0.808	-0.0477	4	-0.821	0.412	-0.0148	0.761	0.0294	0.577
203227_s_at	6302	TSPAN31	0.148	0.205	-0.347	0.00711	0.125	0.291	0.00203	0.986	-0.00708	0.958	-0.336	0.0101	-0.0054	0.965	0.0628	0.607	-0.0761	0.578	-0.0425	0.716	-0.0723	7.05	-0.595	0.552	1	-0.146	0.384	0.0783	0.561	-0.175	0.17	-0.11	7.05	-0.806	0.421	-0.172	0.133	0.0677	0.584
200773_x_at	5757	PTMA	-0.0135	0.907	-0.333	0.00871	0.0783	0.501	0.0501	0.654	-0.0372	0.781	-0.0913	0.476	0.263	0.0279	0.077	0.521	0.0227	0.866	0.11	0.34	-0.0614	10.8	-0.513	0.608	1	-0.0631	0.702	0.123	0.354	0.0248	0.844	-0.296	10.8	-2.2	0.0282	-0.112	0.318	0.0658	0.589
221321_s_at	30819	KCNIP2	-0.14	0.18	0.421	0.000254	-0.0466	0.659	-0.0188	0.853	0.0421	0.729	0.0935	0.421	-0.00441	0.968	-0.0952	0.382	0.0585	0.632	-0.0701	0.501	-0.0159	6.46	-0.147	0.883	1	0.00479	0.974	0.212	0.078	0.259	0.0232	0.146	6.46	1.2	0.23	0.0582	0.568	-0.0592	0.591
201589_at	8243	SMC1A	0.0458	0.771	-0.5	0.00385	0.271	0.0882	0.0985	0.519	0.0313	0.864	-0.158	0.367	0.292	0.0738	0.215	0.189	0.0429	0.816	0.168	0.284	-0.141	5.53	-0.866	0.387	1	0.118	0.601	0.333	0.0661	-0.156	0.363	-0.276	5.53	-1.5	0.134	-0.22	0.152	0.0892	0.591
202446_s_at	5359	PLSCR1	-0.202	0.368	-0.77	0.00184	-0.238	0.295	-0.0902	0.679	-0.292	0.262	-0.289	0.248	0.00367	0.987	-0.0515	0.826	-0.099	0.706	-0.101	0.653	-0.107	6.42	-0.457	0.648	1	-0.37	0.25	-0.0587	0.82	-0.6	0.0145	-0.454	6.42	-1.73	0.0839	-0.25	0.255	-0.127	0.592
215028_at	57556	SEMA6A	-0.128	0.462	-0.563	0.0033	0.163	0.355	0.076	0.652	-0.231	0.252	-0.383	0.0477	0.317	0.0795	0.0542	0.765	0.121	0.552	-0.133	0.442	-0.0589	4.87	-0.326	0.745	1	-0.143	0.565	0.565	0.00484	-0.0804	0.672	-0.0753	4.87	-0.371	0.711	-0.349	0.0401	-0.0975	0.596
238702_at	165679	SPTSSB	-0.0985	0.131	0.239	0.000907	0.112	0.0896	0.0372	0.557	-0.125	0.0987	0.0763	0.294	0.0216	0.75	0.00859	0.9	-0.0691	0.366	0.133	0.0415	-0.0662	4.14	-0.976	0.33	0.923	-0.104	0.266	-0.0339	0.652	-0.0498	0.485	0.115	4.14	1.51	0.131	0.103	0.107	0.0363	0.599
204646_at	1806	DPYD	-0.0142	0.881	-0.376	0.000336	0.0367	0.703	-0.0596	0.518	-0.0809	0.464	-0.223	0.0354	-0.0544	0.582	-0.0113	0.909	-0.041	0.713	0.12	0.204	-0.0326	4.22	-0.33	0.742	1	-0.0113	0.934	-0.111	0.309	-0.0965	0.352	-0.168	4.22	-1.51	0.131	-0.244	0.00886	0.0524	0.602
230569_at	57587	KIAA1430	0.0409	0.34	-0.176	0.000197	0.0178	0.681	0.0188	0.652	-0.041	0.411	-0.0472	0.322	-0.00486	0.913	0.0345	0.441	-0.0608	0.226	0.0188	0.66	-0.0479	3.54	-1.08	0.282	0.923	0.0237	0.699	-0.0119	0.809	0.0469	0.317	0.000449	3.54	0.00896	0.993	-0.00615	0.883	0.0236	0.602
240532_at	140679	SLC32A1	0.157	0.427	0.714	0.00109	0.157	0.435	-0.123	0.521	-0.184	0.425	-0.0068	0.975	0.000655	0.997	0.0334	0.872	0.214	0.357	0.334	0.091	-0.152	6.7	-0.737	0.461	0.923	-0.187	0.511	0.0462	0.839	0.248	0.252	0.275	6.7	1.19	0.235	0.0407	0.833	-0.109	0.603
222906_at	28982	FLVCR1	-0.0182	0.819	-0.244	0.00535	0.0231	0.773	-0.00284	0.971	0.0548	0.553	-0.0852	0.335	-0.0473	0.567	-0.0643	0.438	0.0922	0.321	-0.086	0.278	-0.188	4.55	-2.28	0.0229	0.923	-0.0683	0.548	-0.00254	0.978	0.00564	0.948	-0.104	4.55	-1.12	0.263	-0.0298	0.701	-0.0432	0.607
238199_x_at	4514	COX3	-0.0463	0.689	-0.343	0.0071	-0.511	1.42e-05	-0.0253	0.822	-0.13	0.333	-0.185	0.15	-0.18	0.133	-0.135	0.264	-0.127	0.348	-0.0618	0.592	-0.0769	9.37	-0.64	0.522	0.932	-0.0793	0.632	0.0454	0.733	-0.114	0.365	-0.292	9.37	-2.16	0.0311	0.0104	0.927	-0.0568	0.642
203138_at	8520	HAT1	0.254	0.0485	-0.409	0.00388	0.128	0.324	0.0182	0.884	-0.0385	0.797	-0.107	0.454	0.154	0.248	0.114	0.395	0.038	0.8	0.0341	0.791	-0.113	4.5	-0.844	0.399	1	-0.12	0.514	-0.0155	0.916	-0.226	0.108	-0.191	4.5	-1.27	0.203	-0.329	0.00901	-0.0597	0.661
242517_at	84634	KISS1R	0.135	0.178	0.291	0.00859	0.0991	0.33	0.136	0.163	-0.223	0.0571	-0.00874	0.938	0.0418	0.689	-0.123	0.242	0.0573	0.627	0.226	0.0247	-0.01	5.52	-0.0961	0.923	0.986	-0.0634	0.66	-0.0569	0.623	-0.00459	0.967	0.0419	5.52	0.357	0.721	-0.00215	0.983	0.0462	0.664
203216_s_at	4646	MYO6	0.189	0.344	-0.609	0.0057	0.231	0.254	-0.03	0.877	-0.0472	0.839	-0.524	0.0189	0.179	0.39	0.0906	0.664	0.311	0.185	0.0544	0.785	-0.21	6.57	-1.01	0.314	1	-0.00522	0.985	0.351	0.127	-0.326	0.136	-0.337	6.57	-1.44	0.15	-0.483	0.0136	0.0917	0.665
219972_s_at	64430	PCNXL4	0.153	0.0287	-0.248	0.00128	-0.0151	0.831	0.0184	0.786	0.00674	0.934	-0.18	0.021	0.00615	0.933	0.103	0.159	0.0399	0.626	0.0114	0.87	-0.0284	4.14	-0.39	0.696	1	0.0602	0.548	0.0379	0.638	-0.00636	0.934	-0.0855	4.14	-1.05	0.296	-0.188	0.00606	-0.0318	0.667
202625_at	4067	LYN	-0.176	0.151	-0.404	0.0028	-0.156	0.208	-0.0656	0.582	-0.286	0.0454	-0.311	0.023	-0.164	0.199	-0.0496	0.698	-0.117	0.416	0.0781	0.523	-0.104	4.62	-0.816	0.415	1	-0.306	0.0822	-0.116	0.411	-0.44	0.00107	-0.278	4.62	-1.94	0.0525	-0.1	0.403	-0.0544	0.675
218056_at	51283	BFAR	0.00941	0.895	-0.261	0.000869	0.00973	0.892	0.0179	0.795	-0.0193	0.815	-0.0614	0.437	0.0773	0.295	0.00213	0.977	0.132	0.113	0.169	0.0173	0.0649	7.05	0.878	0.38	1	-0.0295	0.772	0.246	0.00269	-0.0731	0.346	0.11	7.05	1.33	0.184	-0.0163	0.815	-0.0315	0.675
209633_at	5523	PPP2R3A	0.00797	0.901	-0.214	0.00242	0.0179	0.783	0.0104	0.868	-0.113	0.131	-0.229	0.00138	-0.0198	0.767	0.0236	0.724	-0.11	0.144	-0.0857	0.181	-0.0865	7.44	-1.3	0.195	1	0.0217	0.814	0.016	0.828	-0.0399	0.569	-0.12	7.44	-1.61	0.109	-0.222	0.000428	0.0277	0.682
229523_at	645369	TMEM200C	0.147	0.0982	0.296	0.00259	0.0606	0.501	-0.104	0.23	0.083	0.423	-0.000189	0.998	-0.096	0.3	0.135	0.147	0.0427	0.682	0.00349	0.969	-0.0391	6.34	-0.422	0.673	0.956	0.0332	0.795	-0.0978	0.34	-0.0202	0.836	-0.0527	6.34	-0.507	0.613	0.00788	0.928	-0.0381	0.686
203148_s_at	9830	TRIM14	-0.0191	0.81	-0.245	0.00514	-0.0361	0.654	-0.0331	0.668	-0.0541	0.559	-0.131	0.139	0.0137	0.868	-0.0518	0.533	0.045	0.629	0.0839	0.291	-0.0377	4.75	-0.456	0.648	1	-0.0936	0.412	0.0319	0.728	-0.186	0.0322	0.012	4.75	0.129	0.897	-0.00155	0.984	0.0335	0.691
213051_at	56829	ZC3HAV1	0.0285	0.863	-0.492	0.00707	-0.128	0.446	0.0381	0.813	-0.19	0.324	-0.41	0.0265	-0.00444	0.979	0.0407	0.814	-0.196	0.313	0.0187	0.91	-0.166	7.18	-0.963	0.336	1	-0.282	0.235	-0.144	0.451	-0.325	0.0731	-0.37	7.18	-1.91	0.0566	-0.0916	0.571	0.0687	0.695
206355_at	2774	GNAL	-0.0692	0.657	0.672	9.84e-05	-0.103	0.514	-0.0675	0.656	0.00403	0.982	-0.0598	0.731	-0.0639	0.694	-0.18	0.268	0.0502	0.783	0.152	0.328	0.00132	4.7	0.00811	0.994	1	0.0251	0.911	0.172	0.339	0.189	0.269	0.0293	4.7	0.161	0.872	-0.0254	0.868	-0.0646	0.696
244104_at	4248	MGAT3	-0.151	0.122	-0.279	0.00973	0.169	0.0872	-0.121	0.202	-0.0871	0.444	0.192	0.0774	-0.2	0.0496	0.0395	0.698	0.0786	0.493	0.253	0.00973	-0.0922	5.83	-0.907	0.365	0.923	0.0228	0.871	0.073	0.517	0.112	0.293	0.213	5.83	1.86	0.0626	0.255	0.00776	-0.0398	0.7
202430_s_at	5359	PLSCR1	-0.222	0.218	-0.648	0.00113	-0.0934	0.609	-0.091	0.604	-0.357	0.0895	-0.334	0.097	0.157	0.404	0.000184	0.999	-0.0924	0.662	-0.111	0.538	-0.245	4.5	-1.31	0.191	1	-0.34	0.189	-0.342	0.1	-0.713	0.000316	-0.423	4.5	-2.01	0.045	-0.179	0.309	-0.072	0.706
226472_at	85313	PPIL4	0.0677	0.422	-0.301	0.00122	0.117	0.172	0.0551	0.502	0.0984	0.316	-0.121	0.199	0.0765	0.383	-0.0056	0.949	0.0429	0.664	0.0635	0.451	-0.0786	3.88	-0.896	0.371	0.923	-0.0144	0.905	-0.0213	0.826	-0.329	0.000382	-0.23	3.88	-2.33	0.0199	-0.158	0.0563	0.0335	0.708
206584_at	23643	LY96	-0.0799	0.618	-0.459	0.00941	-0.172	0.29	-0.0549	0.724	-0.309	0.0981	-0.312	0.0805	-0.132	0.43	-0.111	0.506	-0.186	0.323	-0.00106	0.995	-0.085	4.47	-0.509	0.611	1	-0.122	0.597	-0.341	0.0648	-0.508	0.00387	-0.318	4.47	-1.7	0.0902	-0.1	0.523	-0.0635	0.708
217730_at	64114	TMBIM1	-0.212	0.19	-0.513	0.00399	0.1	0.539	0.063	0.688	-0.1	0.593	-0.104	0.562	0.192	0.252	-0.0763	0.651	-0.0907	0.632	0.115	0.477	-0.309	7.39	-1.84	0.0665	1	-0.155	0.503	-0.0695	0.709	-0.334	0.0584	-0.236	7.39	-1.25	0.212	-0.0178	0.91	-0.0632	0.711
217894_at	51133	KCTD3	0.00461	0.962	-0.4	0.000182	0.0214	0.827	-0.0565	0.547	0.0113	0.92	-0.256	0.0177	0.0484	0.63	-0.041	0.684	0.165	0.145	0.071	0.462	-0.0388	4.39	-0.386	0.7	1	-0.0352	0.8	0.127	0.254	-0.174	0.0987	-0.162	4.39	-1.44	0.151	-0.312	0.001	-0.0375	0.714
207030_s_at	1466	CSRP2	0.362	0.0543	-0.58	0.00505	0.325	0.0871	0.0233	0.898	0.11	0.615	0.112	0.59	0.291	0.136	0.022	0.911	-0.102	0.643	0.374	0.0459	-0.0926	6.66	-0.474	0.635	1	0.158	0.558	0.28	0.196	-0.164	0.425	-0.329	6.66	-1.5	0.134	-0.0328	0.858	-0.0715	0.719
207568_at	8973	CHRNA6	-0.0861	0.261	0.226	0.00746	-0.0387	0.618	-0.0573	0.442	-0.0134	0.881	0.098	0.251	-0.118	0.139	-0.0169	0.833	-0.0294	0.743	0.061	0.426	0.0867	6.14	1.09	0.277	1	0.0125	0.91	0.0942	0.286	0.113	0.179	0.0831	6.14	0.927	0.354	0.132	0.0786	-0.029	0.72
205029_s_at	2173	FABP7	0.318	0.162	-0.691	0.00579	-0.101	0.659	-0.0387	0.861	0.147	0.579	-0.286	0.259	-0.16	0.497	-0.00865	0.971	0.167	0.531	-0.0483	0.831	-0.117	6.5	-0.493	0.622	1	0.125	0.7	0.258	0.324	-0.708	0.00444	-0.45	6.5	-1.7	0.0902	-0.316	0.155	-0.0854	0.722
205030_at	2173	FABP7	0.242	0.226	-0.75	0.000682	0.0252	0.901	0.113	0.56	0.202	0.385	-0.0925	0.678	-0.112	0.591	0.0272	0.896	0.0988	0.673	0.159	0.427	-0.0615	9.4	-0.296	0.768	1	0.0982	0.732	0.0923	0.689	-0.869	7.64e-05	-0.399	9.4	-1.71	0.088	0.0152	0.938	0.0728	0.731
201307_at	55752	2011-09-01	0.23	0.041	-0.331	0.00741	0.121	0.287	-0.00704	0.948	0.169	0.195	-0.0928	0.458	0.105	0.368	0.099	0.398	0.102	0.44	0.131	0.242	-0.0287	8.25	-0.246	0.806	1	-0.142	0.377	0.29	0.0249	-0.156	0.202	-0.148	8.25	-1.13	0.26	-0.147	0.181	0.0405	0.733
212110_at	23516	SLC39A14	-0.268	0.26	-0.687	0.00884	0.00491	0.984	-0.0544	0.814	-0.0303	0.913	-0.295	0.266	-0.256	0.301	-0.168	0.5	-0.0881	0.752	0.0172	0.942	-0.178	7.47	-0.716	0.474	1	-0.331	0.332	-0.294	0.283	-0.709	0.00659	-0.285	7.47	-1.03	0.306	-0.246	0.291	-0.0842	0.738
200967_at	5479	PPIB	0.12	0.518	-0.551	0.00701	0.237	0.207	-0.0825	0.647	-0.21	0.331	-0.208	0.313	0.341	0.0775	-0.0287	0.882	0.235	0.28	-0.0604	0.744	-0.452	7.41	-2.34	0.0194	1	-0.0809	0.761	0.00637	0.976	-0.628	0.00202	-0.319	7.41	-1.47	0.142	-0.303	0.0953	-0.0648	0.741
206893_at	6299	SALL1	-0.0859	0.599	-0.466	0.00963	0.0746	0.652	0.0129	0.935	0.171	0.369	-0.328	0.0713	0.295	0.0823	0.121	0.477	0.128	0.504	0.227	0.163	-0.197	5.21	-1.16	0.246	1	0.112	0.632	0.343	0.0683	-0.254	0.155	-0.0543	5.21	-0.285	0.776	-0.406	0.0111	0.0568	0.742
207405_s_at	5884	RAD17	0.0951	0.15	-0.198	0.00653	0.108	0.107	0.0457	0.476	-0.0524	0.495	-0.128	0.0831	0.0897	0.192	0.0418	0.545	0.135	0.0806	0.0244	0.711	-0.000244	4.39	-0.00355	0.997	1	0.069	0.466	0.0199	0.793	0.0355	0.623	0.0354	4.39	0.459	0.647	-0.0721	0.264	0.0228	0.744
212335_at	2799	GNS	0.0486	0.657	-0.324	0.00713	-0.103	0.354	-0.011	0.917	-0.191	0.133	-0.252	0.0388	-0.0724	0.524	-0.0805	0.48	-0.013	0.919	-0.071	0.515	0.00304	5.49	0.0267	0.979	1	-0.0202	0.898	0.0748	0.552	-0.342	0.0043	-0.0518	5.49	-0.406	0.685	-0.191	0.0736	0.0363	0.753
218446_s_at	51030	TVP23B	0.118	0.282	-0.381	0.00164	0.0326	0.769	-0.0499	0.64	0.117	0.358	-0.35	0.00425	0.0686	0.547	-0.0295	0.797	0.161	0.21	0.06	0.583	0.0282	5.25	0.248	0.804	1	0.152	0.332	0.239	0.0592	-0.197	0.0999	-0.0615	5.25	-0.48	0.631	-0.238	0.0269	0.0353	0.761
227326_at	439921	MXRA7	0.0816	0.375	0.297	0.00341	0.0272	0.77	-0.0282	0.752	0.157	0.143	0.0116	0.91	0.0596	0.533	0.0629	0.512	0.101	0.349	-0.0348	0.704	-0.137	7.32	-1.43	0.152	0.923	0.091	0.49	0.0177	0.867	0.0623	0.535	0.0507	7.32	0.472	0.637	-0.0376	0.676	-0.0294	0.762
227718_at	5814	PURB	0.0604	0.313	-0.188	0.00434	0.0549	0.365	0.0417	0.473	-0.143	0.0406	0.0229	0.731	-0.00828	0.894	-0.127	0.0421	-0.0601	0.392	0.0283	0.636	0.0525	4.1	0.842	0.4	0.923	0.0347	0.686	0.0717	0.298	-0.018	0.783	0.0393	4.1	0.562	0.575	-0.00153	0.979	0.0181	0.775
228915_at	1602	DACH1	0.157	0.253	0.457	0.00254	0.0112	0.936	0.0359	0.788	0.123	0.441	-0.21	0.17	-0.0274	0.848	0.138	0.335	0.0815	0.612	0.00333	0.981	-0.0253	5.16	-0.177	0.86	0.98	0.0708	0.719	-0.179	0.257	0.295	0.0495	-0.000715	5.16	-0.00445	0.996	-0.0638	0.635	0.0414	0.776
210817_s_at	10241	CALCOCO2	0.0195	0.849	-0.318	0.00493	-0.0281	0.787	-0.0395	0.692	-0.194	0.105	-0.171	0.135	0.0211	0.843	-0.0371	0.729	-0.158	0.188	0.00849	0.934	-0.104	8.26	-0.978	0.328	1	-0.27	0.067	0.00371	0.975	-0.261	0.0203	-0.237	8.26	-1.98	0.0481	-0.265	0.00831	-0.0307	0.777
213365_at	112479	ERI2	0.0954	0.241	-0.316	0.00044	0.0881	0.285	0.0597	0.45	-0.174	0.066	-0.194	0.0324	-0.047	0.578	0.039	0.646	-0.101	0.289	0.0821	0.312	-0.0786	5.07	-0.929	0.353	1	0.0455	0.696	0.0619	0.509	0.00984	0.912	-0.123	5.07	-1.3	0.195	-0.204	0.0103	0.0243	0.778
228732_at	2977	GUCY1A2	-0.00683	0.956	0.424	0.00178	-0.216	0.0831	-0.164	0.17	0.16	0.264	-0.0924	0.5	0.0907	0.478	-0.0358	0.78	0.26	0.071	-0.137	0.263	-0.054	5.58	-0.422	0.673	0.956	-0.16	0.365	0.0439	0.757	0.0331	0.805	-0.0709	5.58	-0.493	0.622	-0.3	0.0127	0.0361	0.781
223909_s_at	55869	HDAC8	-0.0108	0.886	0.305	0.00026	0.114	0.135	-0.0201	0.784	-0.0472	0.591	0.165	0.0497	-0.0708	0.367	-0.0111	0.888	-0.0912	0.302	0.0459	0.543	0.0982	6.68	1.25	0.211	0.923	0.00606	0.955	-0.0536	0.537	-0.0135	0.869	0.216	6.68	2.44	0.0148	0.176	0.0174	0.022	0.783
201894_s_at	6745	SSR1	0.0991	0.135	-0.24	0.00105	0.0164	0.807	0.0228	0.723	-0.0959	0.214	0.0318	0.666	0.0254	0.712	0.0636	0.358	0.00271	0.972	0.0408	0.537	0.0159	6.23	0.23	0.818	1	-0.0312	0.743	-0.0351	0.646	-0.15	0.0385	-0.0948	6.23	-1.22	0.221	0.0342	0.598	-0.019	0.787
208966_x_at	3428	IFI16	0.0436	0.856	-0.716	0.00693	0.103	0.671	-0.0829	0.723	-0.225	0.421	-0.271	0.312	0.082	0.743	0.0344	0.891	0.189	0.503	-0.0411	0.864	-0.129	6.74	-0.517	0.605	1	-0.337	0.329	-0.0556	0.841	-0.633	0.0163	-0.477	6.74	-1.7	0.0901	-0.239	0.31	-0.0686	0.787
226251_at	55252	ASXL2	0.107	0.072	-0.197	0.00259	0.0197	0.744	0.0787	0.173	0.0207	0.764	0.116	0.0804	0.0441	0.475	0.048	0.438	0.0362	0.602	-0.0474	0.424	-0.0453	3.6	-0.733	0.464	0.923	-0.0464	0.586	-0.00598	0.93	0.0164	0.8	-0.14	3.6	-2.01	0.0447	-0.0905	0.12	-0.0169	0.787
203132_at	5925	RB1	0.133	0.331	-0.495	0.001	0.111	0.422	-0.126	0.342	-0.102	0.522	-0.617	5.44e-05	-0.0662	0.641	0.0436	0.76	0.0127	0.937	0.0635	0.641	-0.0494	4.51	-0.348	0.728	1	0.0423	0.829	-0.0899	0.567	-0.422	0.00477	-0.24	4.51	-1.5	0.133	-0.291	0.0296	-0.0387	0.788
225602_at	152007	GLIPR2	-0.227	0.0767	-0.495	0.000466	0.276	0.0336	0.0447	0.72	-0.276	0.0644	-0.125	0.382	0.0539	0.686	0.0272	0.839	-0.13	0.388	0.038	0.767	-0.35	7.73	-2.63	0.00882	0.923	-0.255	0.165	-0.164	0.267	-0.159	0.257	-0.224	7.73	-1.5	0.135	-0.249	0.0476	-0.0346	0.799
206878_at	1610	DAO	-0.0727	0.42	0.3	0.00257	-0.145	0.113	0.0472	0.59	-0.0876	0.404	0.174	0.083	0.0124	0.894	-0.0458	0.627	-0.12	0.255	0.0324	0.719	0.0153	6.04	0.163	0.87	1	0.0523	0.686	0.0103	0.921	0.124	0.21	0.106	6.04	1	0.316	-0.0429	0.627	0.024	0.802
117_at	3310	HSPA6	-0.0474	0.534	0.258	0.0022	-0.0743	0.336	0.0857	0.248	0.00509	0.954	0.156	0.0661	-0.0563	0.478	-0.0193	0.808	-0.0523	0.558	0.125	0.101	0.00994	5.94	0.125	0.9	1	0.054	0.622	-0.0204	0.817	0.12	0.151	-0.0802	5.94	-0.9	0.368	0.205	0.00624	-0.0199	0.805
213027_at	6738	TROVE2	0.116	0.236	-0.326	0.0026	0.144	0.146	0.0573	0.548	-0.0158	0.89	-0.272	0.013	0.0963	0.346	0.0141	0.89	0.0701	0.542	0.126	0.2	-0.14	6.23	-1.37	0.171	1	0.0621	0.659	0.227	0.0445	-0.131	0.222	-0.197	6.23	-1.72	0.0866	-0.266	0.00573	0.0251	0.809
242136_x_at	403340	MGC70870	0.0623	0.349	-0.21	0.00425	0.0801	0.234	0.0583	0.367	0.155	0.0448	0.0195	0.792	0.0144	0.835	0.00991	0.886	0.0461	0.554	-0.018	0.786	0.075	3.69	1.08	0.279	0.923	0.0545	0.568	0.0101	0.895	-0.0235	0.747	-0.0786	3.69	-1.01	0.312	-0.0191	0.769	0.0168	0.811
230774_at	145482	PTGR2	0.0721	0.112	-0.153	0.00227	-0.00129	0.978	0.0379	0.39	0.0125	0.812	-0.0464	0.358	0.0696	0.14	0.0167	0.725	0.0385	0.469	0.0517	0.254	-0.0399	3.31	-0.846	0.398	0.923	0.022	0.735	-0.0378	0.47	-0.0523	0.291	-0.102	3.31	-1.92	0.0547	-0.00192	0.965	-0.0108	0.821
218157_x_at	56882	CDC42SE1	-0.124	0.234	-0.359	0.00173	-0.0246	0.815	0.0734	0.468	-0.0407	0.736	-0.191	0.0987	-0.0691	0.522	-0.0157	0.885	-0.0156	0.898	0.0166	0.873	0.0382	7.68	0.353	0.724	1	-0.258	0.0837	0.279	0.0201	-0.133	0.243	-0.18	7.68	-1.49	0.138	-0.074	0.467	0.0242	0.826
223502_s_at	10673	TNFSF13B	-0.132	0.367	-0.421	0.00884	-0.295	0.0461	-0.102	0.474	-0.219	0.198	-0.4	0.0141	-0.0583	0.701	-0.275	0.0715	-0.149	0.384	-0.212	0.147	-0.369	6.21	-2.43	0.0155	0.923	-0.391	0.0622	-0.421	0.0126	-0.473	0.00315	-0.185	6.21	-1.08	0.28	-0.216	0.13	-0.0338	0.827
210512_s_at	7422	VEGFA	-0.181	0.533	-0.979	0.00218	-0.13	0.658	-0.263	0.35	-0.534	0.114	-0.551	0.0882	-0.504	0.0946	-0.496	0.101	-0.0176	0.959	-0.284	0.326	-0.528	6.57	-1.75	0.0801	1	-0.665	0.11	-0.466	0.163	-1.01	0.00148	-0.808	6.57	-2.39	0.0173	-0.342	0.228	-0.065	0.832
209821_at	90865	IL33	0.0734	0.429	-0.282	0.00591	-0.0351	0.708	-0.0356	0.693	0.122	0.257	-0.183	0.0765	0.00184	0.985	0.0231	0.812	-0.0408	0.707	0.126	0.173	0.0332	4.23	0.344	0.731	1	0.0773	0.561	0.114	0.285	0.0218	0.83	-0.0887	4.23	-0.818	0.414	0.0691	0.446	0.0196	0.841
213533_at	27065	NSG1	-0.0893	0.562	0.492	0.00382	-0.0793	0.611	-0.0911	0.543	0.0767	0.669	0.013	0.94	-0.029	0.856	-0.0388	0.81	0.249	0.168	-0.015	0.922	0.112	6.74	0.7	0.484	1	-0.0759	0.731	0.203	0.252	0.00871	0.959	0.395	6.74	2.2	0.0285	-0.0871	0.563	0.0307	0.85
212459_x_at	8801	SUCLG2	0.178	0.182	-0.409	0.00556	-0.062	0.646	0.0201	0.877	-0.0115	0.941	-0.187	0.209	0.0516	0.711	0.262	0.0604	-0.0756	0.629	0.0759	0.569	-0.166	4.84	-1.19	0.233	1	0.147	0.442	0.273	0.0766	-0.359	0.0143	-0.21	4.84	-1.34	0.18	-0.235	0.0722	0.0266	0.851
212628_at	5586	PKN2	0.145	0.132	-0.312	0.00321	-0.0761	0.433	-0.00393	0.966	0.0628	0.573	-0.187	0.0799	0.06	0.547	0.0545	0.586	0.124	0.27	0.0841	0.38	-0.125	5.74	-1.25	0.211	1	-0.0637	0.643	0.338	0.00229	-0.094	0.37	-0.134	5.74	-1.19	0.233	-0.274	0.0036	-0.0186	0.855
204469_at	5803	PTPRZ1	0.247	0.159	-0.668	0.000561	0.115	0.517	0.00839	0.961	-0.0823	0.687	-0.329	0.0928	-0.0892	0.625	0.112	0.542	-0.132	0.521	-0.0984	0.574	-0.0903	9.26	-0.495	0.621	1	0.0408	0.871	0.259	0.2	-0.517	0.00718	-0.47	9.26	-2.29	0.0221	-0.288	0.0936	-0.0338	0.855
219540_at	10308	ZNF267	0.0469	0.529	-0.23	0.00509	-0.0194	0.797	-0.0434	0.549	-0.0929	0.284	-0.224	0.00714	-0.0807	0.298	0.0688	0.377	0.0618	0.479	0.0449	0.547	-0.00826	4.43	-0.106	0.915	1	-0.105	0.325	-0.0657	0.444	-0.159	0.0518	-0.101	4.43	-1.16	0.248	-0.113	0.121	0.0134	0.865
208650_s_at	100133941	CD24	0.017	0.855	-0.344	0.000834	0.0416	0.659	0.0632	0.485	-0.031	0.775	0.0778	0.453	0.0696	0.472	-0.0103	0.916	-0.0469	0.667	0.297	0.00144	0.0106	4.06	0.109	0.913	1	0.000908	0.995	0.0662	0.537	-0.045	0.658	-0.024	4.06	-0.221	0.825	0.0307	0.736	-0.0165	0.867
209569_x_at	27065	NSG1	0.0611	0.735	0.675	0.000725	-0.125	0.494	-0.0385	0.827	0.165	0.434	-0.0192	0.924	0.0166	0.93	0.0341	0.856	0.377	0.0757	0.213	0.238	0.111	7.41	0.589	0.556	1	-0.00319	0.99	0.123	0.556	0.0951	0.63	0.34	7.41	1.61	0.108	-0.0503	0.776	0.0305	0.873
211678_s_at	55905	RNF114	0.368	0.021	-0.469	0.00756	0.351	0.0298	0.106	0.493	0.00852	0.963	-0.18	0.31	0.0596	0.719	0.111	0.503	0.04	0.83	0.128	0.419	-0.0725	7.89	-0.438	0.662	1	-0.125	0.583	0.0121	0.948	-0.181	0.299	-0.104	7.89	-0.558	0.577	-0.256	0.1	0.0241	0.886
210101_x_at	51100	SH3GLB1	-0.118	0.269	-0.315	0.00732	-0.0333	0.758	-0.127	0.222	-0.143	0.249	-0.0492	0.679	0.127	0.251	-0.0971	0.383	0.00895	0.943	0.0471	0.658	-0.0675	7.55	-0.609	0.543	1	0.0672	0.66	0.213	0.0827	-0.239	0.0406	-0.304	7.55	-2.44	0.0149	-0.0658	0.528	-0.0161	0.887
211126_s_at	1466	CSRP2	0.262	0.116	-0.474	0.0099	0.172	0.308	-0.0334	0.837	0.0516	0.79	0.121	0.515	0.272	0.116	0.0488	0.779	-0.0551	0.778	0.251	0.132	-0.16	6.51	-0.923	0.356	1	0.0124	0.959	0.443	0.0213	-0.291	0.11	-0.105	6.51	-0.539	0.59	-0.104	0.524	-0.0242	0.891
219154_at	144404	TMEM120B	0.18	0.0368	0.284	0.00273	0.0208	0.811	0.0192	0.818	0.168	0.0927	0.212	0.027	-0.0656	0.463	0.0578	0.519	-0.0903	0.37	0.107	0.213	-0.0484	5.52	-0.541	0.589	1	0.0656	0.595	-0.0495	0.617	0.266	0.00472	0.0203	5.52	0.202	0.84	-0.0473	0.573	0.0124	0.891
209798_at	4863	NPAT	-0.0839	0.206	-0.217	0.00297	-0.0936	0.163	0.0198	0.758	-0.0761	0.324	-0.166	0.0248	0.0023	0.973	-0.0127	0.854	-0.0123	0.874	0.102	0.124	-0.0857	6.37	-1.24	0.215	1	-0.0515	0.588	0.0077	0.92	-0.131	0.0714	0.00531	6.37	0.0685	0.945	-0.178	0.00621	0.00943	0.893
202850_at	5825	ABCD3	0.162	0.297	-0.447	0.00915	0.154	0.329	0.0494	0.744	0.000163	0.999	-0.405	0.0194	0.181	0.264	0.0342	0.833	0.12	0.508	0.123	0.43	-0.177	7.75	-1.09	0.275	1	-0.125	0.576	0.364	0.0422	-0.27	0.112	-0.414	7.75	-2.28	0.023	-0.242	0.112	-0.0218	0.894
213761_at	56890	MDM1	0.225	0.0345	-0.361	0.00207	0.00492	0.964	0.0293	0.776	0.102	0.409	-0.338	0.00436	0.0309	0.78	0.0274	0.805	0.0745	0.549	0.161	0.129	0.0552	4.78	0.499	0.618	1	-0.00687	0.964	0.113	0.355	-0.11	0.343	-0.189	4.78	-1.52	0.129	-0.312	0.00278	0.0142	0.9
212569_at	23347	SMCHD1	0.105	0.0526	-0.206	0.000531	0.00832	0.879	-0.0242	0.645	-0.00581	0.926	-0.128	0.0333	0.0363	0.517	-0.00463	0.934	0.00806	0.898	0.0287	0.594	-0.0429	4.5	-0.764	0.445	1	-0.037	0.632	0.0972	0.118	-0.0785	0.183	-0.0505	4.5	-0.801	0.423	-0.131	0.0129	-0.00637	0.911
203603_s_at	9839	ZEB2	0.0274	0.908	-0.856	0.00102	0.211	0.378	0.00941	0.967	-0.14	0.61	-0.716	0.00661	0.0559	0.82	0.144	0.559	-0.0407	0.883	-0.0861	0.715	-0.173	6.19	-0.704	0.482	1	-0.0182	0.957	0.58	0.0331	-0.116	0.654	-0.408	6.19	-1.48	0.14	-0.591	0.0107	0.0274	0.913
244076_at	340533	KIAA2022	0.00974	0.914	0.278	0.00507	-0.0436	0.632	-0.0739	0.398	0.0334	0.749	0.002	0.984	-0.119	0.204	-0.108	0.25	0.0777	0.461	0.148	0.101	0.0444	5.52	0.475	0.635	0.951	0.0419	0.746	-0.0337	0.745	0.0829	0.399	0.0322	5.52	0.306	0.76	-0.182	0.0392	-0.00923	0.923
223950_s_at	84256	FLYWCH1	0.102	0.281	0.301	0.00403	0.189	0.0493	-0.122	0.187	-0.0416	0.706	0.133	0.21	0.0378	0.702	0.0891	0.368	0.117	0.292	-0.0555	0.558	-0.0775	7.81	-0.785	0.433	0.923	-0.091	0.504	-0.0792	0.469	0.00955	0.927	0.0588	7.81	0.53	0.596	-0.0968	0.297	-0.00934	0.926
218854_at	29940	DSE	0.0322	0.76	-0.313	0.0071	0.0538	0.614	-0.0289	0.778	-0.158	0.199	-0.159	0.176	0.101	0.357	0.0328	0.766	0.0354	0.774	0.0578	0.583	0.0401	5.04	0.365	0.715	1	-0.162	0.285	-0.0648	0.594	-0.145	0.21	-0.167	5.04	-1.36	0.175	0.0273	0.791	0.0104	0.926
221087_s_at	80833	APOL3	-0.0224	0.809	-0.309	0.00243	0.0292	0.755	-0.0503	0.576	-0.192	0.0755	-0.108	0.296	0.0312	0.746	0.0182	0.85	-0.209	0.0539	-0.13	0.161	-0.165	6.17	-1.71	0.0874	1	-0.142	0.285	-0.0851	0.424	-0.217	0.0324	-0.0714	6.17	-0.66	0.509	0.0573	0.526	0.00889	0.928
212070_at	9289	GPR56	0.052	0.734	-0.526	0.00184	0.113	0.466	0.0475	0.749	-0.0456	0.798	-0.0361	0.832	-0.0867	0.586	-0.235	0.142	-0.103	0.564	-0.0697	0.648	-0.229	8.94	-1.44	0.151	1	-0.197	0.37	-0.0498	0.778	-0.51	0.00237	-0.325	8.94	-1.81	0.0701	-0.02	0.893	-0.0126	0.938
214720_x_at	151011	2010-09-01	0.00403	0.96	-0.307	0.000624	-0.053	0.519	-0.0251	0.751	-0.0681	0.471	-0.00933	0.918	0.0191	0.821	-0.0379	0.655	-0.11	0.247	0.0132	0.87	-0.151	4.63	-1.78	0.0752	1	-0.114	0.326	0.111	0.236	-0.143	0.106	-0.0275	4.63	-0.29	0.772	-0.163	0.0399	0.00648	0.94
210568_s_at	5965	RECQL	0.0101	0.816	-0.133	0.00556	0.0122	0.782	0.0294	0.487	0.0617	0.223	-0.0696	0.151	0.0568	0.209	-0.035	0.441	0.0197	0.699	0.0882	0.0424	0.0381	4.47	0.842	0.4	1	0.0518	0.406	0.128	0.0109	-0.019	0.69	0.0582	4.47	1.14	0.253	-0.0373	0.381	-0.00347	0.94
204068_at	6788	STK3	0.0223	0.77	-0.232	0.00602	0.0808	0.297	0.0536	0.47	-0.0347	0.697	0.0209	0.806	0.0836	0.293	0.0374	0.64	-0.0109	0.903	0.171	0.0254	0.00885	5.44	0.111	0.911	1	0.0572	0.602	-0.0705	0.423	-0.0289	0.73	-0.163	5.44	-1.82	0.0686	0.0142	0.849	-0.006	0.941
200889_s_at	6745	SSR1	-0.0786	0.404	-0.272	0.00878	-0.0137	0.886	-0.0322	0.724	0.0126	0.909	-0.0357	0.733	0.102	0.298	-0.021	0.831	-0.0807	0.464	-0.00961	0.919	0.103	4.79	1.05	0.294	1	0.015	0.911	0.243	0.0253	-0.123	0.233	-0.108	4.79	-0.983	0.326	-0.00795	0.931	-0.00656	0.947
242907_at	2634	GBP2	-0.456	0.0204	-0.634	0.00344	-0.413	0.0381	-0.279	0.144	-0.6	0.00884	-0.395	0.0715	-0.0257	0.9	-0.162	0.43	-0.139	0.546	-0.101	0.607	-0.156	4.26	-0.765	0.445	0.923	-0.109	0.698	-0.35	0.122	-0.715	0.00091	-0.156	4.26	-0.679	0.497	-0.153	0.425	0.0136	0.948
201193_at	3417	IDH1	0.147	0.216	-0.378	0.00394	0.0649	0.59	-0.0106	0.927	-0.0728	0.599	-0.314	0.0178	0.0094	0.939	0.06	0.629	0.00435	0.975	0.0634	0.593	-0.13	6.74	-1.05	0.294	1	-0.126	0.46	-0.093	0.497	-0.423	0.00118	-0.274	6.74	-1.97	0.0493	-0.171	0.142	-0.00713	0.955
201560_at	25932	CLIC4	-0.0732	0.68	-0.535	0.00619	0.306	0.088	0.105	0.543	-0.131	0.525	-0.249	0.207	0.233	0.206	0.0292	0.875	-0.037	0.859	0.153	0.387	-0.271	8.41	-1.47	0.142	1	-0.118	0.642	0.252	0.218	-0.327	0.0918	-0.492	8.41	-2.37	0.0179	-0.27	0.12	0.0106	0.955
208274_at	10896	OCLM	-0.0158	0.81	0.188	0.00961	-0.0283	0.671	0.0426	0.505	-0.119	0.121	0.0815	0.266	-0.00769	0.91	0.0585	0.395	-0.192	0.0131	-0.0475	0.469	0.087	5.47	1.27	0.204	1	0.0834	0.377	0.00162	0.983	0.202	0.00505	0.0793	5.47	1.03	0.302	0.0754	0.241	0.00383	0.956
209662_at	1070	CETN3	0.227	0.15	-0.517	0.00292	0.25	0.117	-0.0313	0.838	0.109	0.554	-0.294	0.0946	0.198	0.227	0.202	0.219	0.186	0.313	0.153	0.331	-0.0348	5.35	-0.212	0.832	1	0.157	0.487	0.139	0.444	-0.303	0.0788	-0.246	5.35	-1.33	0.182	-0.219	0.155	-0.00867	0.959
212795_at	23325	KIAA1033	0.0938	0.482	-0.405	0.00584	0.0138	0.918	-0.114	0.38	-0.232	0.135	-0.307	0.0389	0.155	0.265	0.107	0.441	-0.0316	0.84	0.0905	0.497	-0.22	7.46	-1.59	0.113	1	0.114	0.551	0.0575	0.708	-0.298	0.0414	-0.239	7.46	-1.53	0.126	-0.284	0.0298	0.00733	0.959
44617_at	79676	OGFOD2	-0.102	0.131	0.201	0.00679	-0.0926	0.176	-0.0225	0.732	0.0504	0.521	0.0923	0.22	-0.0166	0.813	-0.0216	0.76	-0.0814	0.303	0.0733	0.277	0.0794	7.5	1.13	0.259	1	0.0172	0.859	0.0266	0.732	0.128	0.0833	0.186	7.5	2.36	0.0186	0.0955	0.148	-0.00332	0.963
213891_s_at	6925	TCF4	0.374	0.0108	-0.426	0.00832	0.339	0.0225	0.0198	0.889	0.219	0.199	-0.202	0.216	0.186	0.221	-0.0141	0.926	0.211	0.218	0.0142	0.922	0.124	8.61	0.814	0.416	1	0.0315	0.881	0.0828	0.623	-0.113	0.48	-0.136	8.61	-0.797	0.426	-0.0457	0.75	0.00687	0.965
217826_s_at	51465	UBE2J1	-0.265	0.0185	-0.344	0.00542	-0.177	0.119	-0.146	0.182	0.0309	0.813	-0.148	0.236	0.0825	0.48	-0.0131	0.911	0.0776	0.555	0.107	0.339	0.0846	4.85	0.725	0.469	1	-0.102	0.528	0.416	0.00133	-0.208	0.0897	-0.0598	4.85	-0.456	0.649	-0.138	0.208	0.00374	0.975
218873_at	54856	GON4L	0.0337	0.624	0.198	0.00918	-0.02	0.774	-0.125	0.0609	0.0881	0.271	0.0155	0.839	-0.0615	0.39	-0.0383	0.594	0.0272	0.736	-0.00577	0.933	-0.0504	6.95	-0.703	0.482	1	-0.072	0.465	-0.0949	0.231	0.0158	0.833	0.0466	6.95	0.58	0.562	0.0159	0.813	-0.00219	0.976
228221_at	126969	SLC44A3	0.141	0.247	-0.478	0.000369	-0.0959	0.435	-0.0726	0.538	0.113	0.426	-0.192	0.156	0.0988	0.434	-0.0724	0.568	-0.26	0.068	-0.000272	0.998	-0.232	5.16	-1.84	0.0664	0.923	-0.0521	0.765	0.000619	0.996	-0.345	0.00943	-0.297	5.16	-2.09	0.0371	-0.107	0.369	-0.00259	0.984
201179_s_at	2773	GNAI3	-0.045	0.672	-0.38	0.00121	-0.0894	0.406	-0.0278	0.788	0.0531	0.668	-0.109	0.357	0.0792	0.474	-0.0639	0.565	0.0438	0.725	0.173	0.104	-0.00422	5.74	-0.0382	0.97	1	-0.161	0.291	0.272	0.0266	-0.2	0.0862	-0.192	5.74	-1.55	0.122	0.03	0.773	-0.0019	0.987
237745_at	641467	TSC22D1-AS1	0.076	0.359	0.3	0.00105	0.00491	0.953	-0.0959	0.234	0.0985	0.307	-0.0268	0.772	0.0403	0.64	0.0322	0.71	-0.221	0.0228	-0.0651	0.432	-0.147	5.88	-1.7	0.0893	0.923	0.0372	0.755	-0.2	0.0361	0.166	0.0671	0.0193	5.88	0.199	0.842	-0.0685	0.398	0.00125	0.989
207992_s_at	272	AMPD3	-0.0948	0.414	-0.379	0.00305	0.136	0.246	-0.125	0.268	-0.194	0.152	-0.165	0.201	0.226	0.0611	-0.103	0.394	-0.0929	0.495	0.108	0.35	-0.271	7.41	-2.24	0.0252	1	-0.121	0.467	0.0834	0.533	-0.0942	0.458	-0.0789	7.41	-0.582	0.561	-0.22	0.0531	-0.0008	0.995
223748_at	83959	SLC4A11	0.0627	0.417	0.0975	0.251	0.207	0.00829	0.194	0.00976	0.196	0.0294	0.203	0.0182	0.049	0.541	0.0706	0.381	0.187	0.0389	0.187	0.0154	-0.0245	4.58	-0.305	0.76	0.962	0.0443	0.689	0.0687	0.44	0.127	0.132	0.0859	4.58	0.952	0.341	0.135	0.0751	0.291	0.000395
219077_s_at	51741	WWOX	0.214	0.0542	-0.0953	0.434	0.34	0.0025	0.284	0.00839	0.115	0.371	-0.0172	0.889	0.237	0.04	0.216	0.062	0.123	0.342	0.21	0.0577	-0.0188	7.61	-0.163	0.87	1	0.1	0.528	0.267	0.0367	-0.0742	0.54	0.0244	7.61	0.188	0.851	0.05	0.645	0.398	0.000728
226171_at	51304	ZDHHC3	0.115	0.14	0.00158	0.985	0.241	0.00235	0.124	0.103	-0.0775	0.392	0.0864	0.319	0.212	0.00913	0.0198	0.808	-0.0581	0.524	0.131	0.0927	-0.0446	6.76	-0.551	0.582	0.938	0.107	0.337	0.00812	0.928	0.00302	0.972	0.0796	6.76	0.874	0.382	0.0132	0.863	0.224	0.00679
206806_at	9162	DGKI	-0.117	0.303	0.182	0.144	-0.313	0.00648	-0.0377	0.732	-0.114	0.386	0.0447	0.723	-0.203	0.0852	-0.0301	0.799	0.0101	0.939	-0.223	0.0485	0.0488	5.93	0.415	0.678	1	0.0716	0.659	0.0894	0.493	0.0739	0.55	0.13	5.93	0.985	0.325	-0.172	0.121	-0.313	0.00903
216967_at	2596	GAP43	-0.182	0.125	-0.0163	0.9	-0.347	0.00387	-0.128	0.267	-0.254	0.0656	-0.112	0.394	-0.0972	0.43	-0.207	0.0939	-0.0305	0.826	-0.00262	0.982	-0.0251	5.06	-0.204	0.839	1	-0.099	0.56	0.3	0.0279	-0.0238	0.854	-0.017	5.06	-0.123	0.902	-0.15	0.194	-0.321	0.0104
203304_at	25805	BAMBI	0.17	0.152	-0.178	0.173	0.323	0.00734	0.219	0.0576	0.0955	0.489	0.0654	0.621	0.228	0.065	0.0685	0.58	-0.00808	0.954	0.202	0.0889	-0.183	6.42	-1.48	0.14	1	0.212	0.213	0.14	0.307	-0.0767	0.555	-0.037	6.42	-0.267	0.79	-0.0658	0.571	0.32	0.0111
211986_at	79026	AHNAK	0.36	0.0163	-0.0804	0.625	0.399	0.00852	0.393	0.00701	0.317	0.0685	0.327	0.0496	0.424	0.00648	0.342	0.0286	0.0388	0.825	0.516	0.000571	0.239	8.78	1.53	0.125	1	0.103	0.632	0.448	0.00946	0.17	0.299	0.00469	8.78	0.0268	0.979	0.38	0.00953	0.351	0.0268
213683_at	23305	ACSL6	-0.152	0.156	0.00604	0.959	-0.28	0.00987	-0.265	0.0111	0.0918	0.461	-0.164	0.168	-0.136	0.222	-0.0238	0.831	0.119	0.341	-0.102	0.338	0.0343	6.46	0.308	0.758	1	-0.104	0.5	0.189	0.125	0.000246	0.998	-0.0889	6.46	-0.71	0.478	-0.104	0.32	-0.245	0.0304
237395_at	199974	CYP4Z1	-0.043	0.573	-0.0547	0.514	-0.244	0.00165	0.0568	0.444	-0.0698	0.432	-0.0919	0.279	-0.14	0.0777	-0.0949	0.233	-0.148	0.0974	-0.0181	0.812	0.0989	5.19	1.25	0.213	0.923	0.0696	0.525	-0.014	0.873	-0.0173	0.835	0.0371	5.19	0.416	0.677	0.000676	0.993	0.174	0.031
218251_at	58526	MID1IP1	0.367	0.0478	0.239	0.241	0.654	0.000506	0.426	0.018	0.512	0.0176	0.395	0.0558	0.468	0.0152	0.262	0.176	0.384	0.0765	0.211	0.253	0.2	8.96	1.04	0.3	1	0.18	0.497	0.387	0.0699	0.342	0.0915	0.0787	8.96	0.364	0.716	-0.0454	0.802	0.398	0.0425
217881_s_at	996	CDC27	-0.0599	0.484	0.0174	0.854	-0.337	0.000111	-0.0882	0.289	-0.0416	0.676	-0.0315	0.741	-0.00495	0.956	-0.00962	0.914	-0.116	0.249	-0.0883	0.301	-0.0182	5.86	-0.204	0.839	1	0.0883	0.472	0.153	0.12	0.0726	0.437	0.0384	5.86	0.384	0.701	0.0413	0.622	-0.182	0.0444
219046_s_at	63876	PKNOX2	-0.11	0.191	0.161	0.0811	-0.252	0.0031	-0.0615	0.451	0.0438	0.654	-0.0606	0.517	-0.13	0.137	-0.0293	0.738	-0.0342	0.728	-0.00868	0.918	-0.0641	7.74	-0.734	0.463	1	0.0498	0.68	0.0896	0.355	0.0589	0.521	0.18	7.74	1.83	0.0672	-0.0516	0.53	-0.176	0.0483
215285_s_at	10745	PHTF1	-0.0581	0.298	-0.0256	0.676	-0.199	0.000451	0.0026	0.962	0.0251	0.699	-0.00093	0.988	0.0176	0.762	0.0541	0.353	0.0777	0.234	-0.0519	0.352	0.117	4.38	2.02	0.0439	1	-0.0506	0.527	-0.0501	0.436	0.0854	0.161	-0.00542	4.38	-0.0832	0.934	0.0214	0.694	-0.112	0.0572
241946_at	340481	ZDHHC21	0.0223	0.778	-0.0301	0.729	-0.275	0.000636	-0.109	0.155	0.109	0.236	-0.104	0.239	0.0336	0.683	-0.139	0.0925	0.056	0.546	-0.033	0.676	0.0499	3.95	0.606	0.545	0.934	-0.0334	0.768	0.108	0.236	0.0125	0.885	-0.0104	3.95	-0.113	0.91	-0.0848	0.273	-0.157	0.0608
230433_at	729970	LOC729970	0.202	0.0128	-0.0167	0.851	0.213	0.00948	0.174	0.0273	0.169	0.0732	0.165	0.0663	0.135	0.109	0.0415	0.623	-0.00765	0.936	0.0676	0.402	0.0452	6.62	0.537	0.591	0.941	0.11	0.344	0.00782	0.933	0.00655	0.941	0.209	6.62	2.21	0.0274	0.0381	0.629	0.156	0.0687
229344_x_at	57494	RIMKLB	0.198	0.0413	0.183	0.0857	0.27	0.006	0.101	0.283	0.0583	0.605	-0.0775	0.472	0.102	0.309	-0.00427	0.966	0.122	0.281	0.0577	0.551	-0.00683	7.3	-0.0678	0.946	0.99	0.0633	0.648	-0.0665	0.551	-0.0127	0.904	-0.12	7.3	-1.06	0.289	-0.0861	0.363	0.185	0.071
207842_s_at	22794	CASC3	0.282	0.0109	0.0365	0.764	0.384	0.000645	0.199	0.0641	0.316	0.0144	0.231	0.0605	0.335	0.00368	0.221	0.0559	0.119	0.357	0.295	0.00764	0.144	8.35	1.26	0.21	1	0.105	0.508	0.236	0.0648	0.093	0.441	-0.0315	8.35	-0.244	0.807	0.129	0.234	0.206	0.078
202423_at	7994	KAT6A	0.114	0.138	-0.113	0.183	0.219	0.00523	0.146	0.0518	0.167	0.0627	0.0897	0.297	0.23	0.00417	0.0801	0.32	0.0314	0.728	0.171	0.0264	-0.0435	8.85	-0.543	0.588	1	-0.035	0.752	0.33	0.00022	0.0329	0.697	-0.0152	8.85	-0.169	0.866	0.0229	0.761	0.14	0.0875
34868_at	23381	SMG5	0.0811	0.191	-0.0274	0.688	0.241	0.000136	0.0368	0.541	0.0624	0.387	0.108	0.119	0.153	0.0178	-0.000579	0.993	0.0759	0.296	0.142	0.0217	0.0297	6.15	0.461	0.645	1	-0.14	0.115	-0.12	0.0927	-0.0193	0.775	0.0962	6.15	1.33	0.185	0.17	0.00527	0.112	0.0892
202933_s_at	7525	YES1	0.258	0.0195	-0.283	0.0194	0.308	0.00578	0.152	0.157	0.0873	0.495	0.0276	0.822	0.21	0.0674	0.0695	0.545	0.0434	0.737	0.119	0.279	-0.0283	4.72	-0.247	0.805	1	0.221	0.161	0.202	0.111	0.00849	0.944	-0.116	4.72	-0.902	0.367	0.00103	0.992	0.198	0.0893
200621_at	1465	CSRP1	0.144	0.293	0.0993	0.509	0.394	0.00462	0.305	0.0219	0.201	0.207	0.258	0.0912	0.519	0.000284	0.25	0.0809	0.262	0.103	0.148	0.279	0.031	10.6	0.217	0.828	1	0.229	0.243	0.536	0.000704	0.164	0.273	-0.111	10.6	-0.696	0.487	0.0161	0.904	0.244	0.0928
232691_at	94097	SFXN5	0.0378	0.445	-0.0256	0.639	0.164	0.0011	-0.124	0.01	0.0444	0.442	-0.0406	0.463	-0.0243	0.637	0.0112	0.828	0.0532	0.36	0.0212	0.669	-0.0547	3.52	-1.06	0.289	0.923	0.0442	0.534	0.082	0.151	-0.00555	0.918	-0.0126	3.52	-0.217	0.828	0.125	0.00993	0.0878	0.0943
222998_at	84232	MAF1	0.179	0.0593	0.0528	0.612	0.25	0.00921	0.112	0.226	0.132	0.23	0.0518	0.623	0.29	0.00329	0.124	0.208	0.208	0.0606	0.0248	0.793	-0.0279	7.65	-0.283	0.777	0.968	-0.00757	0.956	-0.103	0.346	-0.0246	0.812	-0.0823	7.65	-0.744	0.457	-0.0135	0.884	0.168	0.0945
230026_at	84545	MRPL43	0.148	0.0908	0.181	0.0595	0.256	0.00379	0.203	0.0166	0.167	0.0992	0.154	0.112	0.235	0.00955	0.211	0.0205	0.208	0.042	0.217	0.0127	0.035	4.92	0.386	0.7	0.957	0.0535	0.669	0.131	0.191	0.126	0.188	0.162	4.92	1.59	0.113	0.0688	0.42	0.154	0.0948
236140_at	2730	GCLM	-0.0626	0.537	-0.183	0.101	-0.291	0.00471	-0.0506	0.607	-0.0629	0.594	-0.256	0.0236	0.122	0.247	-0.11	0.299	0.0798	0.501	-0.168	0.0963	-0.155	3.79	-1.47	0.141	0.923	0.000909	0.995	0.165	0.157	-0.31	0.00528	-0.0313	3.79	-0.264	0.791	-0.111	0.265	-0.177	0.0989
226357_at	10869	USP19	0.149	0.0602	0.0643	0.46	0.214	0.00763	-0.0229	0.766	0.101	0.275	0.0946	0.283	0.0565	0.493	0.00891	0.914	0.142	0.127	0.101	0.201	-0.0326	7.39	-0.396	0.692	0.956	0.00977	0.931	-0.166	0.0683	-0.0545	0.529	-0.01	7.39	-0.108	0.914	-0.0866	0.264	-0.138	0.0991
214749_s_at	54470	ARMCX6	0.278	0.0176	-0.0702	0.585	0.324	0.00628	0.175	0.124	0.113	0.408	0.0237	0.856	0.102	0.403	0.0843	0.49	0.109	0.427	0.127	0.276	-0.0976	8.38	-0.802	0.423	1	0.048	0.775	-0.123	0.361	-0.159	0.213	-0.136	8.38	-0.992	0.322	-0.00517	0.964	0.196	0.114
222756_s_at	408	ARRB1	0.127	0.256	-0.0914	0.459	0.295	0.00957	0.135	0.217	0.167	0.202	0.247	0.048	0.229	0.0499	0.239	0.0411	0.0689	0.6	0.139	0.216	-0.0397	6.42	-0.341	0.734	0.962	0.0613	0.703	0.0928	0.473	0.037	0.763	0.0747	6.42	0.57	0.569	0.057	0.603	0.184	0.121
240299_at	132612	ADAD1	-0.12	0.139	0.0407	0.65	-0.217	0.00867	0.0051	0.949	-0.0714	0.451	-0.0225	0.804	-0.155	0.0679	0.0166	0.845	-0.148	0.121	-0.00456	0.955	0.192	4.83	2.26	0.0239	0.923	0.0725	0.535	0.0302	0.748	0.102	0.251	0.0964	4.83	1.01	0.311	0.175	0.0285	0.132	0.126
219563_at	79686	LINC00341	0.211	0.176	-0.391	0.0227	0.474	0.00272	0.237	0.118	0.0428	0.813	-0.0802	0.644	0.513	0.00158	0.29	0.0746	-0.0543	0.766	0.352	0.0236	0.0455	6.45	0.281	0.779	1	0.112	0.616	0.357	0.047	-0.147	0.387	-0.0378	6.45	-0.208	0.835	-0.0228	0.881	0.248	0.132
229800_at	9201	DCLK1	0.636	0.0204	0.207	0.492	0.76	0.00625	0.562	0.0353	0.564	0.0773	0.132	0.665	1.05	0.000236	0.4	0.162	0.384	0.232	0.911	0.000915	0.208	7.62	0.729	0.466	0.923	0.743	0.0589	0.127	0.687	-0.124	0.68	-0.549	7.62	-1.71	0.0871	0.00835	0.975	0.434	0.135
212568_s_at	1737	DLAT	0.0537	0.667	0.0899	0.511	-0.326	0.00994	-0.104	0.391	-0.0176	0.903	-0.217	0.118	-0.135	0.299	-0.13	0.318	0.0544	0.709	-0.118	0.344	0.0643	6.19	0.496	0.62	1	0.0376	0.833	0.147	0.307	0.0535	0.694	-0.121	6.19	-0.828	0.408	-0.268	0.0279	-0.196	0.137
218655_s_at	54883	CWC25	0.0494	0.496	0.0775	0.331	-0.248	0.00078	0.0405	0.566	-0.07	0.407	-0.00713	0.93	-0.0369	0.624	0.0434	0.566	-0.091	0.284	0.115	0.114	0.0238	6.93	0.316	0.752	1	0.0444	0.669	0.00988	0.906	0.152	0.055	0.0986	6.93	1.16	0.245	0.0993	0.162	0.114	0.138
214246_x_at	50488	MINK1	0.0746	0.553	0.0415	0.764	0.427	0.00082	0.0995	0.415	0.18	0.218	-0.00524	0.97	0.00179	0.989	0.0502	0.702	0.156	0.29	0.142	0.258	-0.173	9.48	-1.32	0.186	1	0.111	0.538	-0.29	0.0458	-0.0406	0.768	0.166	9.48	1.13	0.26	-0.0511	0.677	0.195	0.143
219379_x_at	140467	ZNF358	0.0859	0.469	-0.0341	0.793	0.328	0.00641	0.13	0.26	0.0895	0.516	0.14	0.29	0.18	0.145	0.0184	0.882	0.0666	0.631	0.0446	0.706	-0.0469	7.59	-0.38	0.704	1	0.0952	0.575	-0.288	0.0353	0.0374	0.772	0.162	7.59	1.17	0.243	0.194	0.0949	0.178	0.157
244369_at	56683	C21orf59	-0.000855	0.989	0.0214	0.756	-0.175	0.00605	0.122	0.0458	-0.0798	0.274	-0.0533	0.445	0.0461	0.479	-0.123	0.0602	-0.0492	0.503	0.126	0.0439	0.0732	3.99	1.12	0.262	0.923	0.039	0.664	-0.0744	0.303	0.0226	0.742	0.000379	3.99	0.00518	0.996	0.0938	0.126	0.0938	0.157
208658_at	9601	PDIA4	0.0302	0.791	-0.131	0.297	0.343	0.00303	0.149	0.178	0.0444	0.738	0.103	0.415	0.228	0.0545	0.085	0.475	-0.0804	0.547	0.251	0.0275	-0.0932	6.48	-0.786	0.432	1	-0.0529	0.746	-0.00924	0.944	-0.0107	0.932	0.0762	6.48	0.572	0.568	0.261	0.0195	0.168	0.163
214394_x_at	1936	EEF1D	0.267	0.0628	-0.22	0.163	0.379	0.00912	0.317	0.0231	0.181	0.278	0.151	0.345	0.176	0.237	0.0411	0.783	0.0253	0.88	0.272	0.0573	-0.117	8.92	-0.785	0.433	1	-0.138	0.502	-0.137	0.407	0.14	0.372	-0.0548	8.92	-0.327	0.744	0.16	0.254	0.211	0.165
238810_at	5991	RFX3	-0.0169	0.71	0.0178	0.722	0.121	0.00897	0.0357	0.421	-0.0319	0.547	-0.0112	0.826	-0.0276	0.56	0.013	0.785	-0.0419	0.432	0.041	0.368	0.0311	3.59	0.655	0.513	0.93	-0.0131	0.841	0.0132	0.801	-0.0343	0.491	0.0477	3.59	0.896	0.37	0.0221	0.62	-0.0663	0.169
201719_s_at	2037	EPB41L2	0.152	0.186	-0.295	0.0198	0.34	0.00354	0.0992	0.375	-0.0552	0.68	-0.017	0.894	0.166	0.166	0.0546	0.649	0.0593	0.66	0.167	0.146	-0.181	8.31	-1.51	0.131	1	0.015	0.927	0.0865	0.514	0.112	0.373	-0.178	8.31	-1.33	0.185	-0.198	0.0789	0.167	0.17
57082_at	26119	LDLRAP1	0.056	0.544	-0.0162	0.873	0.242	0.00985	0.111	0.215	-0.0336	0.754	0.0615	0.55	0.105	0.275	0.0485	0.615	-0.0971	0.369	0.201	0.0295	-0.0308	6.07	-0.32	0.749	1	0.0122	0.927	0.138	0.194	0.167	0.0981	0.139	6.07	1.29	0.197	0.0726	0.421	0.13	0.182
201667_at	2697	GJA1	0.41	0.0337	-0.133	0.529	0.545	0.00532	0.46	0.0142	0.311	0.166	-0.0205	0.924	0.313	0.118	0.304	0.131	0.167	0.46	0.369	0.0553	0.191	10.6	0.954	0.34	1	0.0283	0.919	0.592	0.0078	0.0144	0.945	-0.439	10.6	-1.95	0.0518	-0.00467	0.98	0.271	0.184
212320_at	203068	TUBB	-0.0276	0.79	-0.243	0.0329	-0.322	0.00215	-0.0471	0.639	-0.128	0.286	-0.181	0.115	-0.126	0.241	-0.182	0.0923	0.0295	0.807	-0.161	0.119	-0.0993	8.88	-0.923	0.356	1	-0.154	0.299	0.047	0.693	-0.138	0.222	-0.155	8.88	-1.28	0.2	-0.3	0.00309	-0.144	0.188
211077_s_at	9874	TLK1	-0.0593	0.244	0.0588	0.293	-0.144	0.00517	0.0441	0.372	-0.00847	0.886	0.0719	0.204	-0.0537	0.31	-0.00255	0.962	0.013	0.827	-0.0255	0.615	0.0296	4.07	0.559	0.576	1	-0.0437	0.549	0.00657	0.911	0.0997	0.073	0.0214	4.07	0.361	0.718	0.055	0.269	-0.0705	0.19
202428_x_at	1622	DBI	0.268	0.0429	-0.228	0.117	0.348	0.00933	0.149	0.247	0.181	0.24	0.124	0.398	0.213	0.12	0.131	0.341	0.238	0.125	0.113	0.392	-0.0564	10.2	-0.41	0.682	1	-0.0148	0.938	0.201	0.187	-0.372	0.0102	-0.355	10.2	-2.3	0.0218	0.0408	0.752	0.183	0.191
212902_at	10802	SEC24A	-0.0383	0.496	-0.0944	0.127	-0.152	0.00777	0.053	0.332	0.0242	0.712	-0.000541	0.993	-0.122	0.0374	0.0271	0.645	-0.000952	0.988	-0.0811	0.149	0.0371	4.6	0.635	0.526	1	-0.0372	0.645	0.169	0.00929	0.0205	0.738	-0.0476	4.6	-0.725	0.469	-0.0191	0.728	0.0768	0.196
221288_at	2845	GPR22	-0.16	0.195	0.00649	0.962	-0.39	0.00186	-0.229	0.0562	-0.152	0.291	-0.0242	0.86	-0.319	0.0131	-0.129	0.314	0.0401	0.781	-0.22	0.0741	0.0118	6.21	0.0917	0.927	1	-0.0228	0.897	-0.0437	0.758	0.0234	0.862	-0.0421	6.21	-0.292	0.77	-0.107	0.375	-0.168	0.198
215483_at	10142	AKAP9	-0.167	0.0367	-0.187	0.0333	-0.291	0.000343	-0.135	0.0832	-0.332	0.000376	-0.424	2.24e-06	-0.185	0.0262	-0.269	0.00129	-0.193	0.0389	-0.121	0.129	-0.263	4.34	-3.16	0.00163	1	-0.199	0.0821	-0.121	0.188	-0.272	0.00189	-0.184	4.34	-1.97	0.0489	-0.17	0.0299	-0.109	0.199
209332_s_at	4149	MAX	0.257	0.0279	-0.223	0.0827	0.306	0.00979	-0.0268	0.813	-0.0136	0.92	-0.14	0.282	0.168	0.166	0.15	0.218	0.167	0.223	0.163	0.161	-0.0235	8.49	-0.194	0.847	1	-0.015	0.929	-0.0644	0.632	-0.218	0.0876	-0.0673	8.49	-0.494	0.622	-0.117	0.305	0.158	0.199
212899_at	23097	CDK19	0.217	0.165	-0.155	0.367	0.425	0.00734	0.222	0.143	0.0854	0.638	-0.159	0.359	0.437	0.00731	0.187	0.25	0.108	0.554	0.215	0.168	-0.174	8.14	-1.07	0.283	1	0.0245	0.913	0.181	0.314	0.0278	0.87	-0.298	8.14	-1.64	0.102	-0.222	0.146	0.211	0.201
215148_s_at	9546	APBA3	0.0713	0.333	-0.0489	0.546	0.294	8.72e-05	0.0583	0.416	0.105	0.22	0.0198	0.809	0.0521	0.496	0.0427	0.579	0.0826	0.339	0.107	0.147	0.0407	5.73	0.531	0.595	1	-0.0717	0.498	0.0198	0.815	-0.0704	0.382	-0.00415	5.73	-0.0482	0.962	0.0449	0.533	0.0992	0.203
203042_at	3920	LAMP2	0.308	0.137	-0.209	0.359	0.711	0.000721	0.314	0.119	0.103	0.669	-0.0619	0.788	0.399	0.0637	0.256	0.236	0.277	0.254	0.153	0.459	-0.0744	7.2	-0.345	0.73	1	0.0545	0.854	0.188	0.43	-0.0643	0.776	-0.456	7.2	-1.88	0.0599	-0.365	0.0719	0.277	0.205
228310_at	55740	ENAH	0.295	0.0132	0.143	0.276	0.33	0.00626	0.319	0.00588	0.301	0.0297	0.0457	0.73	0.35	0.0047	0.17	0.172	0.176	0.207	0.0963	0.417	-0.0633	7.84	-0.511	0.609	0.942	0.0821	0.63	0.0022	0.987	0.167	0.2	-0.0931	7.84	-0.67	0.503	-0.0181	0.876	0.158	0.209
204719_at	10351	ABCA8	0.277	0.341	-0.0266	0.934	0.857	0.00371	0.317	0.262	-0.0242	0.943	-0.0987	0.761	0.725	0.0168	0.347	0.253	0.25	0.464	0.397	0.172	-0.151	6.85	-0.497	0.619	1	0.0583	0.889	0.381	0.256	-0.0344	0.914	-0.298	6.85	-0.878	0.38	-0.511	0.0724	0.386	0.209
219144_at	78986	DUSP26	0.169	0.117	-0.0594	0.615	0.291	0.00765	-0.0879	0.4	-0.0159	0.899	0.188	0.117	-0.0119	0.915	0.106	0.344	0.245	0.0522	-0.0604	0.574	-0.0285	7.67	-0.255	0.799	1	-0.138	0.37	-0.202	0.103	-0.0476	0.685	-0.0167	7.67	-0.133	0.895	0.034	0.746	-0.142	0.212
217981_s_at	26515	TIMM10B	-0.123	0.0853	-0.0915	0.245	-0.198	0.00636	0.0544	0.435	0.0942	0.259	-0.05	0.531	0.0169	0.82	-0.0608	0.416	0.0518	0.537	-0.0023	0.974	0.00213	5.61	0.0286	0.977	1	0.0605	0.556	0.197	0.017	-0.0768	0.327	0.0608	5.61	0.726	0.468	0.000132	0.998	-0.0943	0.213
231372_at	153328	SLC25A48	0.135	0.174	0.168	0.125	0.307	0.00232	0.175	0.0701	0.0526	0.649	0.209	0.0594	0.098	0.343	0.124	0.231	0.081	0.486	-0.066	0.506	0.0427	6.81	0.413	0.68	0.956	-0.0864	0.544	0.117	0.307	0.174	0.109	0.0949	6.81	0.817	0.414	0.0106	0.913	0.131	0.214
202329_at	1445	CSK	0.0468	0.571	0.0108	0.906	0.238	0.0046	0.188	0.0192	0.11	0.254	0.0755	0.412	0.199	0.0207	0.0959	0.266	0.0153	0.875	0.218	0.00839	0.00265	7.27	0.0308	0.975	1	-0.0564	0.634	-0.0205	0.829	0.00313	0.972	0.0698	7.27	0.723	0.47	0.125	0.122	0.105	0.229
206381_at	6326	SCN2A	-0.27	0.17	0.198	0.359	-0.539	0.00686	-0.401	0.0362	0.145	0.526	0.238	0.278	-0.233	0.254	-0.144	0.484	0.206	0.372	-0.145	0.459	0.249	6.08	1.22	0.224	1	0.148	0.598	0.554	0.0145	-0.148	0.49	0.201	6.08	0.877	0.381	-0.255	0.186	-0.248	0.233
213074_at	55023	PHIP	0.127	0.175	-0.217	0.0347	0.253	0.00762	-0.0378	0.677	0.042	0.699	-0.174	0.0946	0.108	0.268	0.0893	0.36	0.0314	0.774	0.119	0.203	-0.0682	8.03	-0.702	0.483	1	0.0419	0.754	-0.0702	0.514	-0.113	0.269	-0.223	8.03	-2.04	0.0418	-0.297	0.0012	0.117	0.237
241075_at	284716	RIMKLA	0.021	0.733	0.0274	0.687	-0.194	0.00202	0.0205	0.733	0.00755	0.916	-0.0805	0.242	-0.0322	0.617	-0.0528	0.413	-0.143	0.0491	-0.0646	0.295	0.0852	4.25	1.33	0.185	0.923	0.0668	0.451	-0.117	0.102	0.0733	0.278	-0.0982	4.25	-1.36	0.174	0.0656	0.278	-0.0767	0.241
216266_s_at	10565	ARFGEF1	-0.18	0.137	-0.117	0.38	-0.33	0.00728	-0.166	0.159	-0.0801	0.571	-0.00673	0.96	-0.0962	0.446	-0.0368	0.772	0.144	0.31	-0.186	0.125	0.0302	6.37	0.239	0.811	1	-0.0241	0.89	0.286	0.0408	-0.118	0.374	0.0591	6.37	0.417	0.677	-0.107	0.369	-0.148	0.25
209285_s_at	23272	FAM208A	0.368	0.0111	-0.227	0.154	0.417	0.00448	0.2	0.155	0.201	0.232	-0.0288	0.858	0.243	0.107	0.235	0.12	0.116	0.494	0.28	0.0524	0.00146	6.83	0.00968	0.992	1	0.0247	0.905	0.0956	0.566	0.0757	0.632	-0.144	6.83	-0.849	0.396	-0.158	0.265	0.176	0.25
218763_at	53407	STX18	0.0135	0.836	0.0216	0.762	-0.183	0.00557	-0.0142	0.822	0.0014	0.985	0.00455	0.95	-0.033	0.625	-0.0832	0.22	-0.052	0.494	-0.0756	0.243	-0.123	7.2	-1.82	0.0692	1	0.143	0.125	0.0705	0.346	-0.0062	0.93	-0.018	7.2	-0.237	0.813	-0.104	0.102	-0.0784	0.253
204955_at	8406	SRPX	0.391	0.0533	-0.168	0.45	0.531	0.00965	0.22	0.263	0.264	0.262	0.26	0.248	0.393	0.0615	0.245	0.246	0.0379	0.873	0.478	0.018	0.0465	5.83	0.221	0.825	1	0.037	0.898	0.145	0.534	-0.0328	0.882	-0.357	5.83	-1.51	0.131	0.0909	0.646	0.243	0.256
208936_x_at	3964	LGALS8	-0.0781	0.374	0.0539	0.577	-0.279	0.00177	-0.136	0.112	0.00485	0.962	0.0412	0.674	-0.0896	0.327	-0.0547	0.551	0.183	0.076	-0.206	0.0194	0.0192	6.95	0.21	0.834	1	-0.0348	0.782	0.0231	0.819	0.047	0.625	-0.0468	6.95	-0.455	0.649	-0.21	0.0148	-0.105	0.257
207781_s_at	7552	ZNF711	-0.0265	0.645	0.0368	0.561	-0.211	0.000319	-0.111	0.0475	-0.000694	0.992	0.00937	0.884	-0.0164	0.784	-0.0503	0.403	0.03	0.657	-0.0117	0.838	0.0496	3.89	0.828	0.408	1	0.0464	0.574	0.105	0.113	0.0604	0.337	0.0415	3.89	0.616	0.538	-0.165	0.00346	-0.0672	0.27
218916_at	79724	ZNF768	0.145	0.167	0.0841	0.466	0.28	0.00856	0.11	0.281	0.126	0.303	0.157	0.181	0.152	0.163	0.0314	0.774	-0.128	0.299	0.0119	0.909	0.0358	6.46	0.327	0.743	1	-0.0604	0.688	-0.145	0.231	0.0681	0.553	0.0885	6.46	0.721	0.471	0.23	0.0256	-0.122	0.272
226656_at	10491	CRTAP	0.176	0.106	0.0983	0.411	0.297	0.00719	0.193	0.0686	0.233	0.0657	0.196	0.106	0.399	0.000449	0.128	0.26	0.0421	0.741	0.336	0.00206	-0.0542	7.48	-0.479	0.632	0.95	0.0806	0.606	0.187	0.135	0.216	0.0698	-0.0673	7.48	-0.53	0.596	-0.0134	0.9	0.126	0.272
208025_s_at	8091	HMGA2	-0.0525	0.6	-0.0321	0.771	-0.287	0.00481	0.0267	0.784	-0.119	0.308	-0.0694	0.534	-0.195	0.0608	0.0337	0.747	-0.159	0.177	0.072	0.472	0.0166	5.38	0.16	0.873	1	0.106	0.46	0.114	0.323	0.166	0.129	0.109	5.38	0.933	0.351	0.0515	0.599	0.115	0.279
226453_at	84153	RNASEH2C	0.0201	0.861	0.0578	0.647	0.341	0.00342	0.135	0.225	0.0453	0.734	0.282	0.0276	0.133	0.264	0.123	0.305	0.204	0.129	0.121	0.292	-0.155	6.93	-1.3	0.195	0.923	0.0972	0.554	0.0574	0.664	-0.013	0.917	0.0638	6.93	0.476	0.634	0.0649	0.563	0.131	0.279
212813_at	83700	JAM3	0.174	0.292	-0.13	0.475	0.471	0.00489	0.113	0.481	0.00117	0.995	0.065	0.724	0.38	0.0268	0.137	0.426	0.132	0.494	0.0506	0.759	-0.231	9	-1.35	0.179	1	-0.152	0.521	0.0844	0.657	0.0381	0.832	-0.223	9	-1.16	0.247	-0.225	0.162	0.187	0.284
227395_at	219899	TBCEL	0.166	0.0595	-0.0292	0.763	0.244	0.00635	0.108	0.208	0.146	0.155	-0.0148	0.88	0.186	0.043	0.0124	0.893	0.152	0.142	0.0569	0.517	-0.0529	4.75	-0.577	0.564	0.935	0.129	0.307	0.0266	0.793	-0.073	0.448	-0.144	4.75	-1.39	0.164	-0.207	0.0167	0.0992	0.287
211474_s_at	5269	SERPINB6	0.314	0.0218	-0.139	0.356	0.404	0.00362	0.21	0.114	0.0442	0.781	0.0811	0.594	0.274	0.0546	0.104	0.468	0.101	0.528	0.189	0.168	-0.126	7.93	-0.882	0.378	1	-0.107	0.585	-0.0353	0.823	0.0269	0.857	-0.0908	7.93	-0.568	0.57	0.0254	0.85	0.153	0.29
212777_at	6654	SOS1	-0.207	0.0242	0.0397	0.693	-0.25	0.0071	-0.0469	0.598	-0.00343	0.974	-0.07	0.492	-0.197	0.039	-0.0037	0.969	0.0637	0.552	-0.128	0.16	0.108	6.18	1.14	0.256	1	0.0512	0.696	0.116	0.273	-0.0163	0.87	0.013	6.18	0.122	0.903	-0.0366	0.683	0.102	0.292
219041_s_at	29803	REPIN1	0.209	0.03	-0.191	0.071	0.334	0.000643	0.0875	0.35	0.12	0.285	0.0499	0.642	0.0839	0.402	0.0999	0.32	0.0979	0.386	0.0785	0.414	-0.0968	7.83	-0.966	0.334	1	-0.0183	0.895	-0.0493	0.657	-0.0371	0.724	-0.00259	7.83	-0.023	0.982	-0.0216	0.818	0.106	0.296
227717_at	389337	ARHGEF37	0.0903	0.546	-0.0466	0.777	0.419	0.00587	0.33	0.0238	0.0415	0.812	0.069	0.679	0.459	0.00333	0.159	0.308	0.0321	0.855	0.162	0.279	-0.25	8.03	-1.6	0.109	0.923	-0.166	0.441	0.0136	0.937	0.0973	0.552	-0.269	8.03	-1.54	0.125	-0.24	0.102	0.164	0.3
32042_at	10495	ENOX2	0.0406	0.35	-0.0224	0.639	0.153	0.000513	0.044	0.298	0.0454	0.37	0.0501	0.301	0.0333	0.461	0.0417	0.358	0.0835	0.101	-0.0184	0.672	0.032	4.12	0.708	0.479	1	-0.0192	0.758	0.0082	0.87	0.0502	0.291	-0.0465	4.12	-0.916	0.36	-0.101	0.0181	0.0474	0.302
213705_at	2677	GGCX	0.181	0.122	0.0255	0.843	0.361	0.00236	0.124	0.276	-0.0559	0.681	-0.00207	0.987	0.175	0.15	0.0787	0.518	-0.202	0.14	0.126	0.281	-0.0822	5.13	-0.677	0.499	1	0.142	0.396	-0.105	0.434	0.156	0.22	0.0204	5.13	0.149	0.881	0.0309	0.787	0.125	0.312
225560_at	29954	POMT2	0.128	0.155	0.0245	0.804	0.378	3.51e-05	0.211	0.0159	-0.0217	0.836	0.168	0.0925	0.237	0.0113	0.0521	0.578	0.069	0.512	0.254	0.00471	-0.00546	7.86	-0.0584	0.953	0.991	0.0028	0.983	-0.0985	0.341	0.0833	0.396	0.138	7.86	1.31	0.19	0.00489	0.956	0.0957	0.313
227206_at	4705	NDUFA10	-0.181	0.144	0.0889	0.513	-0.381	0.0024	-0.145	0.227	-0.0012	0.993	-0.0172	0.901	0.0824	0.522	-0.197	0.127	0.132	0.362	-0.0401	0.745	-0.0422	5.25	-0.328	0.743	0.962	-0.202	0.256	0.0861	0.546	0.0258	0.849	0.047	5.25	0.325	0.745	-0.323	0.00773	-0.131	0.318
217859_s_at	55334	SLC39A9	-0.0813	0.142	0.0241	0.693	-0.157	0.00526	-0.0251	0.641	-0.0587	0.362	0.0306	0.62	0.0363	0.529	-0.0411	0.476	-0.0557	0.39	0.0315	0.569	0.0349	5.11	0.607	0.544	1	0.0305	0.701	0.151	0.0183	0.0168	0.781	0.195	5.11	3.01	0.00269	0.0209	0.699	-0.0581	0.321
217118_s_at	23313	KIAA0930	0.255	0.0636	0.171	0.259	0.43	0.00208	0.14	0.295	0.133	0.407	0.03	0.845	0.499	0.000506	0.133	0.354	0.0466	0.772	0.0797	0.562	-0.000376	9.35	-0.00263	0.998	1	0.181	0.358	0.118	0.455	0.199	0.186	0.0615	9.35	0.382	0.702	-0.0765	0.569	0.142	0.329
227565_at	51088	KLHL5	0.337	0.0743	0.044	0.832	0.511	0.00759	0.287	0.118	0.226	0.304	-0.00797	0.97	0.518	0.00839	0.434	0.0275	0.472	0.0328	0.0722	0.701	-0.101	5.57	-0.515	0.606	0.942	0.422	0.119	0.0459	0.833	-0.115	0.575	-0.104	5.57	-0.473	0.636	-0.144	0.434	0.194	0.331
213300_at	23130	ATG2A	0.108	0.23	0.0268	0.787	0.251	0.00612	0.135	0.125	-0.0491	0.639	0.0982	0.328	0.015	0.873	0.105	0.265	0.0411	0.697	0.0782	0.385	-0.142	7.43	-1.52	0.129	1	0.104	0.421	-0.0195	0.851	0.0203	0.837	0.153	7.43	1.45	0.147	0.0848	0.336	-0.0921	0.334
218276_s_at	60485	SAV1	0.243	0.0385	-0.0936	0.467	0.34	0.00424	0.115	0.311	0.13	0.341	-0.0751	0.565	0.193	0.113	0.233	0.0571	0.127	0.356	0.26	0.0266	-0.0128	6.02	-0.105	0.917	1	0.0322	0.848	0.0719	0.594	-0.102	0.426	-0.114	6.02	-0.832	0.405	-0.152	0.184	0.118	0.339
219795_at	11254	SLC6A14	-0.00249	0.952	0.0555	0.226	-0.11	0.00919	0.0891	0.0282	-0.0139	0.774	0.0647	0.164	-0.0727	0.0939	0.0548	0.208	-0.0599	0.221	-0.0266	0.522	0.0248	3.9	0.571	0.569	1	0.0138	0.817	-0.0322	0.502	0.0698	0.126	-0.0407	3.9	-0.836	0.404	0.115	0.00505	0.0418	0.343
231779_at	3656	IRAK2	0.108	0.0645	-0.0647	0.315	0.175	0.00331	0.0108	0.849	0.131	0.0543	-0.00541	0.934	0.015	0.805	-0.0134	0.827	-0.00848	0.902	0.0394	0.5	0.102	6.14	1.68	0.094	0.923	-0.112	0.182	-0.101	0.135	-0.0263	0.681	0.00943	6.14	0.138	0.89	0.0485	0.397	0.0582	0.347
242621_at	221785	ZSCAN25	-0.0286	0.706	0.0743	0.372	-0.202	0.00867	-0.014	0.85	-0.0673	0.446	0.00688	0.935	-0.125	0.113	0.0181	0.819	-0.0638	0.472	-0.0288	0.703	0.0713	6.68	0.904	0.366	0.923	0.0224	0.837	-0.0228	0.794	0.091	0.272	-0.000514	6.68	-0.0058	0.995	0.106	0.154	0.0744	0.353
212196_at	3572	IL6ST	-0.231	0.144	-0.257	0.139	-0.474	0.00311	-0.212	0.167	-0.0311	0.866	-0.251	0.154	-0.00508	0.975	-0.0258	0.876	0.207	0.264	-0.0805	0.61	-0.144	7.71	-0.876	0.381	1	-0.0202	0.929	0.527	0.00392	-0.167	0.333	-0.289	7.71	-1.56	0.118	-0.271	0.0801	-0.155	0.355
212189_s_at	25839	COG4	0.15	0.0798	0.0576	0.539	0.282	0.00114	0.111	0.181	0.0288	0.771	0.231	0.015	0.112	0.205	0.0405	0.649	0.0186	0.852	0.115	0.177	-0.0496	7.47	-0.559	0.577	1	-0.00947	0.938	-0.151	0.124	-0.047	0.614	0.00116	7.47	0.0117	0.991	0.214	0.0103	-0.0831	0.357
203652_at	4296	MAP3K11	0.105	0.301	0.0649	0.56	0.268	0.00914	0.00383	0.969	0.0185	0.875	0.144	0.203	0.239	0.0232	0.0367	0.728	0.00767	0.948	0.107	0.29	-0.0265	7.46	-0.251	0.802	1	0.069	0.634	-0.084	0.471	0.0663	0.548	0.107	7.46	0.901	0.368	0.11	0.268	0.0972	0.364
218168_s_at	56997	ADCK3	0.0969	0.294	-0.0546	0.591	0.32	0.000665	0.0816	0.363	0.162	0.133	0.0105	0.919	0.199	0.0384	0.0102	0.915	0.138	0.201	0.245	0.00802	-0.00576	7.02	-0.0599	0.952	1	-0.0464	0.726	0.0953	0.37	-0.0458	0.65	0.172	7.02	1.59	0.111	0.0425	0.638	0.0883	0.367
223622_s_at	81888	HYI	0.0405	0.657	0.0939	0.349	0.259	0.00525	0.145	0.104	0.101	0.341	0.141	0.165	0.317	0.000891	0.177	0.0628	0.161	0.133	0.185	0.0426	-0.132	6.68	-1.39	0.166	0.923	-0.0921	0.482	-0.00279	0.979	0.068	0.496	0.0528	6.68	0.495	0.621	0.0455	0.611	0.0863	0.371
217266_at	6138	RPL15	0.0718	0.42	-0.125	0.2	-0.251	0.00549	-0.0779	0.367	-0.0796	0.442	0.102	0.302	-0.165	0.0756	-0.12	0.198	-0.121	0.245	-0.0732	0.41	-0.0272	5.84	-0.294	0.769	1	0.16	0.209	0.169	0.0998	-0.0015	0.988	-0.119	5.84	-1.14	0.254	-0.0288	0.74	0.084	0.372
202172_at	7716	VEZF1	0.287	0.0738	-0.326	0.0655	0.436	0.00741	0.119	0.446	0.074	0.692	-0.0978	0.584	0.459	0.00615	0.22	0.189	0.293	0.12	0.251	0.117	-0.13	7.28	-0.777	0.437	1	0.0931	0.686	0.226	0.223	-0.0205	0.907	-0.168	7.28	-0.895	0.371	-0.29	0.0647	0.152	0.372
211337_s_at	27229	TUBGCP4	-0.157	0.142	0.0822	0.485	-0.307	0.00473	-0.0366	0.725	-0.134	0.281	-0.11	0.355	-0.157	0.16	-0.0656	0.557	0.0787	0.53	-0.0913	0.393	0.0612	6.08	0.55	0.583	1	-0.158	0.305	0.377	0.00229	0.0207	0.86	-0.0272	6.08	-0.217	0.828	-0.103	0.327	-0.0985	0.384
228548_at	5906	RAP1A	0.176	0.0718	0.0393	0.714	0.261	0.0083	0.051	0.59	0.0651	0.566	-0.0719	0.507	0.341	0.000799	-0.00172	0.987	0.215	0.0603	0.119	0.222	-0.00824	7.08	-0.0813	0.935	0.986	-0.105	0.452	-0.0743	0.508	0.0291	0.785	-0.0627	7.08	-0.551	0.582	0.0278	0.77	0.0896	0.385
222537_s_at	56882	CDC42SE1	0.0471	0.51	-0.132	0.0923	0.228	0.00172	0.0201	0.773	-0.0126	0.88	-0.00413	0.959	0.142	0.0565	0.0573	0.443	0.0681	0.416	0.128	0.0735	-0.0768	7.65	-1.03	0.302	0.923	0.0256	0.803	-0.0221	0.788	-0.073	0.35	0.05	7.65	0.598	0.55	-0.0262	0.708	0.0648	0.391
209222_s_at	9885	OSBPL2	0.198	0.0524	-0.155	0.167	0.292	0.00478	0.0737	0.458	0.135	0.256	0.0934	0.412	0.0784	0.46	0.121	0.256	0.302	0.0117	0.0708	0.487	-0.0445	6.98	-0.419	0.676	1	-0.04	0.785	0.051	0.665	-0.145	0.194	0.0723	6.98	0.605	0.545	0.0236	0.813	0.0923	0.393
225505_s_at	64773	PCED1A	0.175	0.0708	0.0317	0.765	0.283	0.00386	0.172	0.0669	0.222	0.0484	0.195	0.0704	0.262	0.00933	0.105	0.297	0.317	0.00523	0.205	0.0337	-0.0215	7.54	-0.214	0.831	0.977	-0.0169	0.903	0.0807	0.468	0.147	0.164	0.104	7.54	0.92	0.358	-0.037	0.695	0.0866	0.397
231899_at	85463	ZC3H12C	0.242	0.0476	-0.0017	0.99	0.367	0.00311	0.184	0.122	0.0391	0.784	-0.16	0.241	0.293	0.0215	0.14	0.273	0.319	0.0264	0.233	0.0568	0.0781	5.49	0.614	0.539	0.934	0.203	0.247	0.0571	0.685	-0.0167	0.901	-0.305	5.49	-2.14	0.033	-0.177	0.14	0.107	0.406
235953_at	162963	ZNF610	0.0863	0.239	0.0506	0.53	-0.192	0.00972	-0.0471	0.509	0.163	0.0566	-0.123	0.132	-0.011	0.885	-0.0681	0.373	-0.0895	0.298	-0.0934	0.202	-0.086	5.82	-1.13	0.26	0.923	0.0289	0.783	-0.0537	0.525	-0.0307	0.702	-0.0702	5.82	-0.819	0.413	-0.164	0.0221	-0.0643	0.407
233186_s_at	54971	BANP	0.0508	0.581	0.0668	0.509	0.353	0.000163	0.158	0.0781	0.15	0.162	0.308	0.00271	0.112	0.24	0.181	0.06	0.23	0.0328	0.348	0.000161	-0.0606	5.85	-0.633	0.527	0.933	-0.0428	0.745	0.0121	0.909	-0.0112	0.911	0.0674	5.85	0.627	0.531	0.163	0.0699	-0.0791	0.416
210191_s_at	10745	PHTF1	-0.0861	0.402	0.0182	0.872	-0.27	0.00959	-0.147	0.142	0.0161	0.893	-0.159	0.165	-0.0782	0.464	-0.0391	0.716	0.256	0.0335	0.0357	0.728	0.113	5.54	1.05	0.292	1	-0.0403	0.785	0.272	0.0216	-0.105	0.349	0.0865	5.54	0.72	0.472	-0.184	0.0676	-0.0881	0.418
220890_s_at	51202	DDX47	0.171	0.102	-0.136	0.236	0.274	0.00978	0.0443	0.663	0.0965	0.428	-0.0277	0.812	0.187	0.0853	-0.027	0.805	0.111	0.367	0.143	0.172	-0.0709	7.74	-0.652	0.515	1	-0.0289	0.847	0.0314	0.794	-0.176	0.124	-0.0901	7.74	-0.737	0.461	-0.22	0.0317	0.0886	0.423
225775_at	340348	TSPAN33	0.0442	0.602	-0.043	0.645	0.294	0.000666	0.186	0.024	-0.0199	0.84	0.258	0.00643	0.0905	0.305	0.0372	0.674	-0.0819	0.41	0.2	0.0186	0.00994	7.41	0.113	0.91	0.985	-0.00884	0.942	-0.00257	0.979	-0.061	0.511	0.0504	7.41	0.508	0.612	0.0258	0.756	-0.0717	0.424
206695_x_at	7594	ZNF43	-0.0355	0.618	-0.12	0.127	-0.225	0.00189	-0.118	0.0902	-0.0706	0.396	-0.233	0.00351	-0.108	0.147	-0.0789	0.289	-0.0322	0.701	-0.154	0.0304	0.00771	5.72	0.104	0.917	1	0.0426	0.677	0.101	0.219	-0.0312	0.689	-0.119	5.72	-1.42	0.156	-0.185	0.00809	-0.0602	0.426
228856_at	65988	ZNF747	-0.0183	0.819	-0.0528	0.548	0.21	0.00967	0.106	0.173	0.0792	0.394	-0.0561	0.528	0.0479	0.564	0.0789	0.344	0.0575	0.538	0.0721	0.366	-0.095	5.72	-1.14	0.253	0.923	-0.0244	0.831	-0.104	0.259	-0.0924	0.289	-0.127	5.72	-1.36	0.173	-0.18	0.0215	0.0658	0.436
223349_s_at	666	BOK	-0.089	0.653	-0.0933	0.669	0.561	0.00529	0.162	0.401	-0.0391	0.865	0.0885	0.688	0.793	0.000129	0.0562	0.786	0.138	0.553	0.136	0.491	-0.403	7.86	-1.95	0.0512	0.923	-0.0734	0.796	0.19	0.406	0.0278	0.898	0.00538	7.86	0.0232	0.981	-0.237	0.221	-0.161	0.443
219728_at	9499	MYOT	0.484	0.0178	0.102	0.649	0.615	0.00295	0.44	0.0266	0.248	0.296	0.421	0.0642	0.455	0.032	0.469	0.0278	0.158	0.509	0.261	0.199	0.355	5.61	1.67	0.0951	1	0.235	0.421	0.375	0.111	0.292	0.19	-0.0699	5.61	-0.293	0.769	0.0859	0.667	0.165	0.445
226885_at	154214	RNF217	0.218	0.0481	0.042	0.729	0.324	0.00376	0.158	0.14	0.104	0.419	0.00669	0.957	0.242	0.0353	0.0754	0.512	0.0447	0.729	0.023	0.835	0.0686	5.71	0.598	0.55	0.934	0.0848	0.592	-0.147	0.248	0.0127	0.916	-0.197	5.71	-1.53	0.127	-0.182	0.091	0.0888	0.446
210357_s_at	54498	SMOX	0.109	0.245	-0.00705	0.945	0.27	0.00439	0.194	0.0325	0.283	0.0094	0.31	0.00293	0.224	0.0212	0.158	0.105	0.137	0.211	0.141	0.131	0.0478	7.59	0.492	0.623	1	0.0641	0.632	0.265	0.0138	0.0289	0.777	-0.0314	7.59	-0.287	0.774	0.278	0.00246	0.075	0.448
229076_s_at	56993	TOMM22	-0.141	0.0901	0.0389	0.67	0.294	0.000496	-0.0576	0.475	0.147	0.128	0.0835	0.367	0.0829	0.337	0.0994	0.252	-0.0841	0.387	0.171	0.0394	-0.115	5.71	-1.34	0.182	0.923	-0.221	0.0643	0.0688	0.472	-0.0136	0.881	0.154	5.71	1.58	0.114	0.112	0.169	-0.0664	0.45
220408_x_at	55578	SUPT20H	0.11	0.113	-0.0453	0.552	0.184	0.00879	0.0744	0.269	0.0127	0.874	0.0403	0.601	0.00808	0.911	0.0216	0.765	0.0867	0.285	0.252	0.000285	-0.161	7.43	-2.23	0.0261	1	-0.0153	0.878	0.119	0.135	0.0294	0.697	0.0326	7.43	0.402	0.687	0.0394	0.56	0.0544	0.457
226789_at	133418	EMB	-0.0878	0.248	-0.0488	0.559	-0.216	0.00521	0.0281	0.703	-0.0281	0.751	-0.175	0.0388	-0.0821	0.299	-0.105	0.187	-0.153	0.0861	-0.156	0.0402	-0.0837	6.81	-1.06	0.291	0.923	-0.0503	0.645	-0.345	8.98e-05	0.0157	0.85	-0.193	6.81	-2.17	0.0302	-0.0814	0.273	0.0597	0.458
240456_at	79722	ANKRD55	-0.107	0.206	0.0913	0.325	-0.222	0.00965	0.00811	0.921	-0.145	0.141	-0.0375	0.69	-0.259	0.00322	-0.0237	0.788	-0.126	0.203	-0.121	0.152	0.0791	6.62	0.901	0.368	0.923	0.124	0.304	0.0133	0.892	0.0604	0.512	-0.0654	6.62	-0.664	0.507	-0.0254	0.759	0.0662	0.458
225004_at	84336	TMEM101	-0.0458	0.575	-0.0247	0.784	0.326	8.94e-05	-0.00534	0.946	-0.029	0.761	0.0779	0.393	0.0704	0.408	0.014	0.869	0.16	0.0951	0.297	0.000295	-0.121	5.98	-1.42	0.156	0.923	-0.0295	0.801	0.148	0.117	0.0676	0.45	0.0546	5.98	0.57	0.569	0.0945	0.238	0.0641	0.459
242123_at	164091	PAQR7	0.11	0.0968	-0.0697	0.338	0.245	0.000273	-0.0112	0.862	0.0465	0.546	0.0953	0.196	0.021	0.76	0.127	0.0663	-0.0897	0.247	0.157	0.0176	-0.0189	5.93	-0.274	0.784	0.972	0.087	0.359	-0.0861	0.258	0.0426	0.556	0.0904	5.93	1.17	0.242	0.144	0.0261	0.0517	0.46
223039_at	83606	GUCD1	0.104	0.26	-0.139	0.172	0.254	0.0067	-0.0431	0.631	0.00264	0.98	0.12	0.245	0.177	0.0656	0.0769	0.425	0.0563	0.603	0.138	0.136	-0.137	7.01	-1.43	0.155	0.923	-0.0843	0.525	-0.0977	0.359	-0.098	0.332	-0.0582	7.01	-0.538	0.59	0.0172	0.849	0.0723	0.46
242898_at	5610	EIF2AK2	-0.0538	0.446	-0.0331	0.67	-0.202	0.00481	-0.0295	0.667	-0.0989	0.229	-0.173	0.0281	-0.0516	0.482	-0.0189	0.797	-0.0796	0.335	-0.12	0.0875	0.141	5.71	1.92	0.0555	0.923	-0.00597	0.953	0.0811	0.318	-0.00825	0.915	0.0273	5.71	0.332	0.74	0.0262	0.704	-0.055	0.461
221828_s_at	89853	MVB12B	0.222	0.125	-0.082	0.607	0.472	0.00131	0.0877	0.533	0.119	0.479	0.147	0.362	0.492	0.00113	0.048	0.751	0.0707	0.677	0.124	0.393	-0.0734	6.49	-0.488	0.626	1	-0.114	0.584	-0.0863	0.605	0.0459	0.772	0.124	6.49	0.732	0.464	0.153	0.28	0.113	0.462
204345_at	1307	COL16A1	0.379	0.0486	0.203	0.337	0.507	0.00921	0.279	0.136	0.0179	0.936	0.218	0.307	0.274	0.169	0.0446	0.824	0.217	0.335	0.215	0.262	-0.153	7.37	-0.768	0.443	1	0.0798	0.772	0.162	0.464	0.266	0.204	0.273	7.37	1.22	0.224	-0.0694	0.711	-0.149	0.463
244668_at	100505902	LOC100505902	-0.119	0.103	-0.0171	0.832	-0.212	0.00421	-0.0259	0.716	-0.098	0.249	-0.0344	0.672	-0.0132	0.862	-0.0248	0.745	-0.191	0.0258	-0.00792	0.914	-0.0769	5.94	-1.01	0.312	0.923	-0.0661	0.528	-0.111	0.187	0.029	0.717	0.0795	5.94	0.932	0.352	0.0438	0.54	-0.0558	0.47
223421_at	50626	CYHR1	0.0686	0.424	0.0544	0.565	0.257	0.00319	0.127	0.13	0.0496	0.62	0.0893	0.351	0.149	0.0946	0.136	0.129	0.086	0.393	0.235	0.00619	-0.0687	7.65	-0.769	0.442	0.923	-0.0605	0.623	0.013	0.895	0.00253	0.978	0.0816	7.65	0.813	0.417	0.012	0.886	0.0653	0.472
211559_s_at	901	CCNG2	-0.35	0.0171	-0.0318	0.843	-0.45	0.0025	-0.0578	0.685	-0.0154	0.928	-0.108	0.507	-0.0749	0.623	-0.0509	0.74	-0.0357	0.835	0.092	0.53	0.00647	6.87	0.0424	0.966	1	0.00495	0.981	0.427	0.0116	-0.0611	0.703	-0.0917	6.87	-0.535	0.593	-0.162	0.259	-0.11	0.477
241706_at	144402	CPNE8	-0.169	0.0959	-0.0683	0.539	-0.283	0.00583	-0.0422	0.667	-0.00245	0.983	-0.22	0.0507	-0.133	0.208	-0.152	0.149	0.0133	0.91	-0.00183	0.986	-0.00987	6.12	-0.0938	0.925	0.986	-0.102	0.483	0.0826	0.478	-0.26	0.0188	-0.0159	6.12	-0.134	0.893	-0.0963	0.33	-0.076	0.477
239435_x_at	134549	SHROOM1	-0.0422	0.633	-0.0181	0.852	0.25	0.00533	0.248	0.00401	0.0109	0.916	0.0796	0.419	0.265	0.00402	0.136	0.141	0.0686	0.508	0.215	0.015	-0.0563	7.7	-0.612	0.541	0.934	-0.0277	0.827	0.138	0.175	0.105	0.275	0.0989	7.7	0.957	0.339	0.0453	0.6	0.0663	0.479
209511_at	5435	POLR2F	0.198	0.0838	-0.0391	0.756	0.345	0.00295	0.204	0.0662	0.114	0.393	0.0614	0.63	0.337	0.00471	0.0959	0.422	0.123	0.357	0.197	0.0841	-0.122	6.81	-1.02	0.307	1	0.0141	0.932	-0.0561	0.67	-0.0146	0.907	-0.0178	6.81	-0.133	0.894	0.108	0.335	0.0851	0.482
225306_s_at	123096	SLC25A29	0.0843	0.45	0.0483	0.694	0.361	0.00145	0.0768	0.479	0.125	0.335	0.0935	0.452	0.368	0.00157	0.11	0.347	0.0676	0.605	0.288	0.01	-0.0856	7.93	-0.737	0.461	0.923	-0.0138	0.931	0.0356	0.782	0.121	0.322	0.0284	7.93	0.217	0.828	0.173	0.112	-0.0828	0.483
237040_at	143884	CWF19L2	0.117	0.18	0.173	0.072	0.346	9.71e-05	0.165	0.0516	0.111	0.273	0.0243	0.803	0.0478	0.599	-0.0836	0.359	0.19	0.0639	0.0452	0.604	-0.142	5.88	-1.56	0.118	0.923	-0.184	0.142	0.124	0.218	0.0446	0.641	0.0419	5.88	0.411	0.681	0.15	0.0797	0.0639	0.489
40569_at	7593	MZF1	0.295	0.0157	0.0245	0.855	0.397	0.00133	0.032	0.787	0.128	0.368	0.0865	0.523	0.075	0.554	0.0239	0.851	0.165	0.247	0.101	0.406	-0.1	7.94	-0.79	0.43	1	0.0808	0.644	-0.127	0.364	0.0323	0.808	0.134	7.94	0.939	0.348	0.0321	0.788	0.0884	0.493
52975_at	89853	MVB12B	0.119	0.241	-0.113	0.314	0.33	0.00137	0.0588	0.552	0.036	0.761	-0.039	0.731	0.244	0.0213	0.0377	0.722	0.0297	0.803	0.108	0.286	-0.146	8.12	-1.38	0.167	1	0.00562	0.969	0.0576	0.622	0.0833	0.453	-0.0408	8.12	-0.344	0.731	0.0216	0.828	0.0734	0.495
222361_at	643224	TUBBP5	-0.0177	0.736	0.0699	0.227	-0.138	0.00953	-3.44e-05	0.999	0.00544	0.929	-0.0764	0.192	-0.111	0.0416	-0.0937	0.0877	-0.0783	0.203	0.115	0.029	-0.169	4.51	-3.08	0.00212	1	-0.0485	0.52	-0.058	0.338	-0.0226	0.694	-0.0341	4.51	-0.555	0.579	0.111	0.0313	0.0365	0.511
202366_at	35	ACADS	-0.0329	0.676	-0.049	0.571	0.24	0.0027	0.11	0.15	0.0342	0.709	0.114	0.195	0.131	0.109	-0.0179	0.827	-0.0606	0.511	-0.0205	0.794	-0.107	7.23	-1.31	0.191	1	0.0501	0.657	-0.121	0.181	0.00275	0.974	-0.0645	7.23	-0.702	0.483	0.257	0.000881	0.0547	0.511
238949_at	153830	RNF145	0.372	0.0342	0.109	0.571	0.638	0.000341	0.118	0.488	0.236	0.247	0.219	0.263	0.0767	0.674	0.226	0.217	0.122	0.551	0.131	0.454	-0.228	6.15	-1.25	0.21	0.923	-0.0762	0.762	-0.164	0.417	0.0442	0.818	0.222	6.15	1.08	0.28	0.237	0.166	0.121	0.515
237254_at	115584	SLC5A11	0.0142	0.944	0.142	0.526	0.589	0.00451	0.164	0.41	0.0792	0.739	0.233	0.306	0.636	0.00283	0.237	0.266	0.137	0.566	0.0315	0.877	-0.215	6.91	-1.01	0.313	0.923	0.0408	0.889	0.128	0.587	0.0892	0.69	-0.109	6.91	-0.458	0.647	-0.0991	0.62	0.14	0.517
201952_at	214	ALCAM	0.239	0.208	0.0712	0.733	0.588	0.00229	0.238	0.198	-0.0587	0.79	0.0517	0.807	0.325	0.0999	0.0498	0.802	0.198	0.374	0.139	0.463	-0.228	9.4	-1.16	0.248	1	0.115	0.673	0.175	0.424	0.111	0.591	-0.185	9.4	-0.835	0.404	-0.23	0.216	0.129	0.521
200776_s_at	9689	BZW1	-0.197	0.0714	-0.121	0.313	-0.33	0.0029	-0.0124	0.907	0.0346	0.785	-0.165	0.176	0.0613	0.589	0.0603	0.597	0.0522	0.683	0.0345	0.752	-0.00806	6.36	-0.0709	0.943	1	-0.0127	0.936	0.382	0.00245	-0.146	0.222	0.00263	6.36	0.0206	0.984	-0.21	0.0493	-0.0741	0.521
212312_at	598	BCL2L1	0.227	0.0845	-0.0696	0.63	0.348	0.00912	-0.0772	0.545	0.106	0.489	0.000431	0.998	0.177	0.195	-0.0787	0.566	0.269	0.0805	-0.0402	0.759	-0.134	7.2	-0.981	0.327	1	-0.139	0.461	-0.18	0.236	-0.086	0.549	0.0901	7.2	0.587	0.558	-0.108	0.402	0.0866	0.533
213741_s_at	3836	KPNA1	-0.0616	0.388	-0.0363	0.644	-0.226	0.00181	-0.136	0.051	-0.0126	0.879	-0.122	0.125	-0.00651	0.93	-0.0438	0.557	0.0206	0.806	0.0226	0.751	-0.0413	5.73	-0.555	0.579	1	-0.101	0.322	0.0812	0.324	0.0605	0.438	0.0181	5.73	0.217	0.828	-0.0652	0.351	-0.0467	0.536
220839_at	29081	METTL5	-0.13	0.109	0.0161	0.856	-0.213	0.00942	-0.0343	0.663	-0.0136	0.885	-0.0861	0.339	-0.196	0.02	-0.0197	0.816	-0.0286	0.763	0.0475	0.557	-3.61e-05	5.05	-0.000429	1	1	0.142	0.223	0.143	0.125	0.136	0.125	-0.0969	5.05	-1.02	0.306	-0.0313	0.693	-0.0529	0.537
213105_s_at	115939	TSR3	0.207	0.0807	-0.0646	0.619	0.441	0.000243	0.166	0.148	0.0766	0.578	-0.00956	0.942	0.306	0.0129	0.116	0.346	0.185	0.181	0.245	0.038	-0.117	6.36	-0.95	0.343	1	0.0361	0.832	-0.241	0.0769	0.00671	0.959	0.202	6.36	1.47	0.143	0.201	0.0824	0.0772	0.537
218429_s_at	55337	C19orf66	-0.0312	0.673	-0.0422	0.603	-0.208	0.00541	-0.169	0.0186	-0.013	0.88	-0.0828	0.314	0.0125	0.871	-0.113	0.145	-0.0743	0.39	-0.0975	0.186	-0.0625	8.5	-0.813	0.416	1	-0.125	0.239	-0.0681	0.423	-0.169	0.0369	-0.0676	8.5	-0.783	0.434	-0.13	0.0725	-0.0474	0.544
200747_s_at	4926	NUMA1	0.127	0.141	-0.0546	0.566	0.274	0.00181	-0.0273	0.746	0.0739	0.463	0.108	0.261	0.213	0.018	0.116	0.201	0.0633	0.533	0.197	0.0231	-0.0655	8.69	-0.728	0.467	1	-0.0784	0.527	0.0117	0.906	0.065	0.492	0.113	8.69	1.12	0.265	0.0376	0.657	-0.0555	0.544
234312_s_at	55902	ACSS2	-0.00933	0.907	0.0303	0.731	0.214	0.00855	0.12	0.122	0.0932	0.318	0.00914	0.919	0.23	0.00595	0.11	0.191	0.0372	0.692	0.173	0.0307	-0.0602	8.14	-0.721	0.471	0.923	-0.0214	0.853	0.0227	0.806	0.0392	0.654	-0.0858	8.14	-0.915	0.361	-0.159	0.0436	0.0513	0.545
212841_s_at	8495	PPFIBP2	0.264	0.0283	-0.0472	0.721	0.375	0.00213	0.208	0.0758	0.0319	0.819	0.14	0.296	0.179	0.151	0.198	0.115	0.0264	0.851	0.0535	0.656	-0.0286	6.31	-0.229	0.819	1	-0.071	0.68	-0.0341	0.806	0.0326	0.804	-0.0399	6.31	-0.284	0.777	-0.205	0.081	0.0768	0.546
229862_x_at	84878	ZBTB45	-0.0255	0.745	0.117	0.174	0.213	0.00767	0.0152	0.842	-0.0499	0.585	0.188	0.0322	0.0158	0.847	0.105	0.201	0.0757	0.411	0.098	0.212	-0.136	6.87	-1.67	0.0958	0.923	0.0402	0.721	-0.105	0.247	-0.0546	0.525	0.115	6.87	1.25	0.212	-0.0271	0.725	0.0501	0.547
224514_x_at	84818	IL17RC	0.0108	0.899	0.0245	0.794	0.233	0.00705	-0.0458	0.581	0.106	0.284	0.219	0.0215	-0.0666	0.453	0.055	0.537	0.0465	0.642	0.073	0.392	-0.066	6.06	-0.742	0.458	0.923	-0.133	0.277	-0.0488	0.62	0.161	0.0853	0.0479	6.06	0.48	0.631	0.0614	0.462	0.0533	0.555
231249_at	23334	SZT2	0.0227	0.762	0.0668	0.418	0.276	0.000307	-0.0499	0.494	-0.0208	0.812	0.0973	0.245	0.00556	0.943	0.0867	0.269	0.105	0.231	0.0733	0.328	-0.00116	3.87	-0.0148	0.988	0.998	0.0975	0.365	3.89e-05	1	0.0197	0.81	-0.158	3.87	-1.8	0.0716	-0.0172	0.814	0.0467	0.556
209525_at	50810	HDGFRP3	0.0529	0.431	0.0266	0.719	-0.269	8.13e-05	-0.0508	0.436	-0.133	0.0898	-0.125	0.0953	-0.115	0.1	0.00235	0.973	-0.0977	0.214	-0.0351	0.601	0.04	5.65	0.573	0.567	1	0.141	0.143	-0.0221	0.775	0.138	0.0593	0.087	5.65	1.11	0.268	0.000404	0.995	0.0413	0.56
207583_at	225	ABCD2	-0.105	0.0364	0.0477	0.388	-0.133	0.00907	-0.0196	0.687	0.0565	0.333	-0.0744	0.183	-0.109	0.037	-0.0215	0.682	-0.0868	0.14	0.0481	0.337	0.056	4.15	1.07	0.283	1	-0.0852	0.237	0.0132	0.819	0.00806	0.883	-0.037	4.15	-0.631	0.528	0.0787	0.109	0.0304	0.567
214780_s_at	4650	MYO9B	-0.0267	0.757	0.00217	0.982	0.283	0.00128	0.0499	0.552	-0.0337	0.738	0.0851	0.377	0.113	0.208	0.059	0.513	-0.00919	0.928	0.0667	0.44	-0.0806	7.55	-0.897	0.37	1	-0.0988	0.425	0.025	0.801	0.0356	0.706	0.223	7.55	2.21	0.0274	0.143	0.091	-0.0519	0.57
217597_x_at	10966	RAB40B	0.179	0.314	-0.12	0.539	0.627	0.00051	0.333	0.0538	0.114	0.582	0.358	0.0701	0.28	0.13	0.147	0.427	0.222	0.286	0.138	0.435	-0.12	6.16	-0.65	0.516	1	-0.121	0.633	-0.136	0.504	0.11	0.572	0.00732	6.16	0.0353	0.972	0.103	0.554	0.106	0.571
202500_at	3300	DNAJB2	0.292	0.0352	-0.0696	0.647	0.4	0.00441	0.0711	0.597	0.129	0.421	0.128	0.407	0.34	0.0184	-0.0121	0.933	0.0492	0.761	0.0613	0.657	-0.182	8.71	-1.26	0.207	1	-0.252	0.205	0.0736	0.644	0.0957	0.526	0.0314	8.71	0.194	0.846	-0.0644	0.634	-0.0825	0.573
227334_at	159195	USP54	0.104	0.487	0.016	0.922	0.396	0.00887	0.175	0.227	0.0428	0.805	0.00354	0.983	0.655	2.75e-05	0.255	0.102	0.205	0.241	-0.0159	0.915	-0.237	9.34	-1.52	0.128	0.923	-0.185	0.388	-0.0342	0.842	0.0179	0.913	-0.359	9.34	-2.06	0.0402	-0.264	0.0709	-0.0875	0.579
213409_s_at	6009	RHEB	0.0448	0.481	-0.00171	0.98	-0.234	0.000308	-0.0817	0.187	0.0187	0.801	0.0962	0.175	-0.0712	0.282	0.0384	0.563	-0.111	0.137	-0.136	0.0331	0.129	4.92	1.94	0.0524	1	0.0251	0.784	0.0938	0.201	0.093	0.181	-0.035	4.92	-0.471	0.638	-0.0304	0.625	-0.0371	0.582
235479_at	132864	CPEB2	-0.142	0.113	0.0284	0.773	-0.247	0.00675	0.00617	0.944	-0.0638	0.541	-0.0297	0.766	0.0996	0.286	0.00573	0.951	-0.102	0.332	0.0647	0.47	0.0833	7.13	0.892	0.373	0.923	0.174	0.176	0.104	0.315	0.0605	0.537	-0.0211	7.13	-0.202	0.84	0.0276	0.753	-0.052	0.584
228696_at	85414	SLC45A3	0.0275	0.83	0.00619	0.965	0.336	0.00963	0.144	0.247	0.11	0.462	0.218	0.126	0.317	0.0174	-0.0112	0.933	0.0998	0.505	0.0786	0.538	-0.249	7.64	-1.87	0.0622	0.923	-0.114	0.535	0.107	0.467	0.148	0.289	-0.0493	7.64	-0.33	0.742	-0.233	0.0624	0.074	0.584
239071_at	5928	RBBP4	-0.0332	0.723	0.0891	0.388	0.293	0.00209	0.0155	0.865	0.0297	0.785	0.22	0.035	-0.1	0.303	0.0748	0.445	0.149	0.175	-0.0261	0.78	-0.0247	6.9	-0.253	0.8	0.976	-0.282	0.0363	0.283	0.00898	0.224	0.0289	0.21	6.9	1.92	0.0557	-0.0469	0.609	-0.0532	0.592
229342_at	55421	C17orf85	0.235	0.0514	0.00171	0.99	0.316	0.00976	0.0894	0.446	0.221	0.115	0.0963	0.473	0.274	0.0293	0.172	0.172	0.00854	0.952	0.192	0.11	-0.106	5.48	-0.845	0.399	0.923	0.0213	0.902	-0.247	0.0752	0.0987	0.454	-0.225	5.48	-1.59	0.111	-0.0911	0.44	0.0681	0.593
202027_at	25829	TMEM184B	0.129	0.211	-0.0978	0.389	0.3	0.00416	0.0778	0.438	0.0256	0.831	0.0748	0.515	0.174	0.105	0.088	0.414	-0.0243	0.841	-0.00608	0.953	-0.0257	7.39	-0.239	0.811	1	-0.0181	0.903	-0.0354	0.766	-0.0195	0.863	-0.0482	7.39	-0.4	0.689	-0.11	0.274	-0.058	0.595
212202_s_at	25963	TMEM87A	0.238	0.0927	-0.319	0.0409	0.415	0.0039	0.167	0.224	0.0322	0.845	0.0504	0.749	0.258	0.0793	0.063	0.67	0.221	0.183	-0.0392	0.781	0.00385	6.09	0.0262	0.979	1	-0.116	0.569	0.252	0.122	-0.14	0.366	-0.24	6.09	-1.45	0.147	-0.135	0.328	0.0795	0.595
226043_at	26086	GPSM1	0.231	0.0199	0.0775	0.476	0.326	0.00118	0.0484	0.615	0.0179	0.876	0.0131	0.905	0.079	0.443	0.0147	0.887	0.248	0.0331	0.164	0.0972	-0.13	8.42	-1.26	0.207	0.923	0.00775	0.956	-0.00334	0.977	-0.106	0.326	-0.0444	8.42	-0.384	0.701	-0.0734	0.448	0.0554	0.597
222910_s_at	51555	PEX5L	0.169	0.262	0.0307	0.853	0.409	0.00727	0.0915	0.531	0.0488	0.78	0.125	0.454	0.461	0.00326	0.117	0.458	0.155	0.379	0.00406	0.978	0.0416	6.73	0.266	0.79	0.972	0.292	0.175	0.0767	0.658	0.107	0.516	-0.187	6.73	-1.06	0.288	-0.146	0.319	0.0838	0.598
213627_at	10916	MAGED2	0.149	0.0868	0.0777	0.416	0.233	0.00822	0.0633	0.454	0.0677	0.503	0.048	0.62	0.0945	0.296	0.0652	0.473	0.0401	0.693	0.0863	0.32	0.0329	8.22	0.364	0.716	1	0.0669	0.592	-0.0492	0.623	-0.0963	0.311	0.104	8.22	1.02	0.307	0.112	0.187	0.0484	0.599
202789_at	5335	PLCG1	0.165	0.0441	-0.0322	0.72	0.228	0.00601	0.17	0.0324	0.0999	0.294	0.187	0.0405	0.149	0.0807	0.124	0.147	0.0932	0.331	0.136	0.0961	-0.113	7.83	-1.33	0.184	1	0.0726	0.536	-0.032	0.734	0.0714	0.424	0.0352	7.83	0.368	0.713	0.0797	0.319	0.0453	0.6
208894_at	3122	HLA-DRA	-0.227	0.42	-0.247	0.426	-0.834	0.00357	-0.34	0.215	-0.48	0.144	-0.381	0.225	-0.143	0.624	-0.0935	0.75	-0.168	0.61	0.0124	0.965	-0.156	7.75	-0.532	0.595	1	-0.832	0.0399	0.0663	0.838	-0.731	0.0177	-0.327	7.75	-0.992	0.322	-0.0498	0.857	0.153	0.607
224749_at	83986	ITFG3	-0.0512	0.554	-0.0532	0.576	0.268	0.00232	0.11	0.19	-0.0569	0.572	0.218	0.0242	0.322	0.000373	0.00805	0.929	0.194	0.0564	0.107	0.217	-0.126	7.55	-1.4	0.163	0.923	-0.119	0.337	-0.0153	0.878	0.0332	0.726	0.0373	7.55	0.368	0.713	-0.053	0.532	-0.0467	0.61
218110_at	56949	XAB2	-0.0381	0.656	0.00839	0.929	0.255	0.00332	-0.0505	0.543	0.131	0.187	0.212	0.0264	0.113	0.203	-0.0796	0.372	0.122	0.224	-0.00656	0.939	-0.205	5.52	-2.31	0.0211	1	-0.0151	0.902	-0.222	0.0241	-0.1	0.284	0.142	5.52	1.43	0.155	-0.0159	0.849	0.0458	0.612
35156_at	203069	R3HCC1	0.135	0.125	-0.03	0.756	0.233	0.00893	8.4e-05	0.999	0.0428	0.675	0.191	0.0513	0.162	0.0774	-0.0738	0.421	0.0738	0.473	0.0477	0.587	-0.066	8.17	-0.722	0.47	1	0.0498	0.693	0.0211	0.835	-0.0352	0.714	-0.00455	8.17	-0.0443	0.965	-0.017	0.843	0.046	0.621
227493_s_at	57456	KIAA1143	-0.000767	0.991	0.0564	0.446	-0.207	0.00246	-0.116	0.0774	0.0487	0.535	-0.147	0.0498	-0.0323	0.645	-0.0911	0.195	-0.183	0.0209	-0.0904	0.179	-0.155	6.09	-2.22	0.0271	0.923	0.213	0.0276	-0.0288	0.711	-0.0787	0.285	-0.0827	6.09	-1.05	0.294	-0.0729	0.268	-0.0352	0.622
202679_at	4864	NPC1	0.132	0.496	-0.176	0.409	0.554	0.0048	0.117	0.534	0.0934	0.678	0.0342	0.874	0.546	0.00672	0.139	0.492	0.14	0.537	0.127	0.51	-0.00517	7.85	-0.0257	0.979	1	-0.0654	0.814	0.137	0.539	-0.0484	0.819	-0.224	7.85	-0.993	0.321	-0.282	0.136	0.101	0.622
219846_at	54856	GON4L	-0.0162	0.756	-0.0216	0.706	-0.145	0.00623	-0.0754	0.137	0.0207	0.733	-0.0604	0.298	-0.0791	0.145	0.00156	0.977	0.0156	0.799	-0.0677	0.193	-0.0638	4.37	-1.18	0.239	1	-0.0224	0.765	0.0486	0.418	0.0892	0.118	0.0662	4.37	1.09	0.277	-0.0487	0.339	-0.0271	0.623
226899_at	219699	UNC5B	-0.0805	0.542	-0.102	0.483	0.403	0.00262	0.32	0.0129	0.16	0.296	0.155	0.292	0.353	0.0103	0.0877	0.525	0.102	0.512	0.0588	0.656	-0.212	6.58	-1.54	0.124	0.923	-0.076	0.688	0.218	0.151	0.0218	0.88	-0.0703	6.58	-0.455	0.649	-0.199	0.124	-0.0676	0.628
227667_at	404093	CUEDC1	-0.0522	0.616	-0.0681	0.552	0.32	0.00243	0.219	0.0307	0.0324	0.789	0.056	0.629	0.238	0.028	0.0811	0.455	0.0292	0.81	0.148	0.155	-0.0959	7.01	-0.886	0.376	0.923	-0.0585	0.695	-0.0593	0.621	-0.0282	0.804	0.0612	7.01	0.503	0.615	-0.102	0.318	0.0528	0.631
213230_at	30850	CDR2L	0.0457	0.711	-0.0103	0.94	0.333	0.00779	-0.00871	0.942	-0.12	0.403	-0.034	0.804	0.273	0.0337	-0.00771	0.952	0.0544	0.706	0.0444	0.718	-0.258	7.11	-2.01	0.0448	1	-0.0125	0.943	0.0944	0.506	0.0217	0.872	-0.0094	7.11	-0.0652	0.948	-0.021	0.862	-0.0624	0.632
226957_x_at	10928	RALBP1	-0.0135	0.872	-0.062	0.503	0.26	0.00239	0.0905	0.269	-0.0928	0.344	0.0927	0.323	0.183	0.0369	0.181	0.0403	0.234	0.0178	0.143	0.0897	-0.0122	5.88	-0.139	0.89	0.982	-0.121	0.316	-0.134	0.168	-0.0286	0.756	0.09	5.88	0.914	0.361	-0.0488	0.554	0.0425	0.633
212204_at	25963	TMEM87A	0.133	0.317	-0.188	0.196	0.396	0.00324	-0.043	0.738	0.0905	0.557	-0.0865	0.557	0.39	0.00473	0.126	0.362	0.109	0.482	0.128	0.332	-0.131	8	-0.948	0.344	1	0.116	0.541	0.0835	0.584	-0.171	0.237	-0.295	8	-1.91	0.057	-0.285	0.0279	-0.065	0.643
213951_s_at	29893	PSMC3IP	0.157	0.0119	-0.00962	0.888	0.189	0.0029	0.0602	0.321	0.0917	0.207	0.162	0.0196	0.115	0.0767	0.00712	0.913	-0.0731	0.317	0.101	0.105	-0.0801	4.21	-1.23	0.217	1	0.0397	0.657	-0.127	0.0764	0.0688	0.312	-0.0134	4.21	-0.183	0.855	0.0678	0.267	-0.0306	0.643
202573_at	1455	CSNK1G2	0.205	0.0611	-0.0512	0.671	0.287	0.00983	0.123	0.247	0.167	0.189	0.0134	0.913	-0.0443	0.697	-0.0107	0.925	0.0971	0.449	-0.0726	0.507	-0.0993	6.95	-0.872	0.383	1	0.0066	0.966	-0.187	0.138	-0.152	0.204	0.112	6.95	0.874	0.383	0.0155	0.885	0.0534	0.644
208614_s_at	2317	FLNB	0.0719	0.445	-0.0616	0.551	0.27	0.00467	0.127	0.166	-0.066	0.546	0.101	0.334	0.174	0.075	0.0856	0.383	-0.046	0.676	0.0717	0.445	-0.177	7.71	-1.81	0.0706	1	-0.0444	0.742	0.125	0.247	0.145	0.157	0.0154	7.71	0.14	0.889	0.013	0.888	0.0458	0.645
204207_s_at	8732	RNGTT	-0.142	0.0823	0.00555	0.951	-0.252	0.00241	0.0334	0.674	0.00336	0.972	-0.0306	0.737	-0.17	0.046	0.0602	0.48	-0.143	0.134	-0.114	0.164	0.0515	5.58	0.606	0.545	1	0.0242	0.836	0.145	0.124	0.157	0.0798	0.00134	5.58	0.014	0.989	-0.031	0.698	0.0397	0.646
232884_s_at	54753	ZNF853	0.197	0.0146	0.116	0.191	0.23	0.00482	0.186	0.018	0.161	0.0861	0.131	0.145	0.294	0.000477	0.115	0.17	0.133	0.158	0.0394	0.625	-0.0741	7.17	-0.884	0.377	0.923	0.0684	0.554	-0.0514	0.58	0.0521	0.554	0.11	7.17	1.17	0.241	-0.0298	0.705	0.039	0.647
223192_at	81894	SLC25A28	0.13	0.234	-0.0637	0.596	0.292	0.00835	0.0455	0.668	0.0916	0.471	0.102	0.402	0.323	0.00464	0.148	0.194	0.1	0.434	0.174	0.112	-0.177	8.6	-1.55	0.121	0.923	-0.148	0.346	-0.154	0.222	-0.111	0.351	-0.0372	8.6	-0.292	0.771	-0.0413	0.699	-0.0528	0.648
225903_at	128869	PIGU	0.000487	0.996	-0.0396	0.695	0.259	0.00541	0.103	0.247	-0.0538	0.614	-0.0371	0.716	0.151	0.115	0.0436	0.649	0.053	0.622	0.109	0.233	-0.034	7.14	-0.356	0.722	0.961	0.0359	0.785	-0.065	0.538	0.028	0.78	-0.0369	7.14	-0.345	0.731	-0.179	0.0463	0.0439	0.651
243804_at	9108	MTMR7	-0.135	0.119	0.126	0.184	-0.272	0.00196	-0.196	0.0199	0.044	0.661	-0.164	0.0889	0.105	0.243	-0.168	0.0631	0.0102	0.92	-0.00652	0.94	-0.0145	4.72	-0.161	0.872	0.981	-0.141	0.256	0.0809	0.416	-0.0359	0.703	-0.0308	4.72	-0.305	0.761	-0.0932	0.27	-0.0413	0.651
223260_s_at	51426	POLK	-0.137	0.234	0.0468	0.712	-0.307	0.00878	-0.117	0.297	0.0982	0.465	-0.0862	0.503	-0.0125	0.917	-0.18	0.136	0.0142	0.916	-0.137	0.235	0.171	6.49	1.42	0.156	0.923	-0.0795	0.631	0.251	0.0599	0.0812	0.52	0.0646	6.49	0.479	0.632	-0.187	0.0982	-0.0551	0.652
227563_at	100131997	FAM27E3	-0.0764	0.316	0.0905	0.28	0.237	0.00219	0.057	0.442	-0.0274	0.757	0.102	0.229	0.00275	0.972	0.103	0.198	0.0399	0.655	0.21	0.00593	-0.0612	7.12	-0.771	0.441	0.923	-0.0322	0.769	0.105	0.232	0.0245	0.768	0.0638	7.12	0.715	0.475	0.167	0.0252	-0.0361	0.654
201686_x_at	8539	API5	-0.214	0.0251	-0.0297	0.776	-0.285	0.00323	-0.0637	0.492	-0.115	0.3	-0.0193	0.856	-0.131	0.187	-0.109	0.274	-0.12	0.281	0.0979	0.304	-0.0749	6.97	-0.756	0.45	1	-0.0284	0.835	0.206	0.0613	0.0338	0.746	0.128	6.97	1.15	0.25	0.0926	0.32	0.045	0.655
230067_at	220108	FAM124A	0.0488	0.759	-0.15	0.391	0.448	0.00546	0.156	0.313	-0.121	0.514	-0.168	0.343	0.558	0.000759	0.11	0.506	-0.00427	0.982	0.146	0.359	-0.337	7.18	-2.04	0.0417	0.923	-0.0904	0.691	-0.134	0.462	0.0382	0.826	-0.199	7.18	-1.07	0.283	-0.386	0.0132	-0.0735	0.662
244297_at	253650	ANKRD18A	0.286	0.103	0.387	0.045	0.584	0.00103	0.197	0.247	0.226	0.269	0.0331	0.865	0.856	3.17e-06	0.195	0.285	0.23	0.262	0.0204	0.907	-0.0639	6.07	-0.351	0.726	0.961	0.127	0.614	0.212	0.293	0.264	0.169	0.0314	6.07	0.153	0.878	-0.188	0.273	0.081	0.662
233173_x_at	9328	GTF3C5	0.169	0.0633	0.139	0.165	0.347	0.000174	-0.00213	0.981	0.114	0.283	0.188	0.0636	0.235	0.0132	0.026	0.784	0.105	0.324	0.0716	0.43	-0.134	7.6	-1.41	0.158	0.923	-0.0207	0.874	-0.0617	0.555	0.0951	0.338	0.0473	7.6	0.445	0.656	-0.123	0.167	0.0413	0.668
225209_s_at	118424	UBE2J2	0.025	0.767	-0.0839	0.366	0.31	0.000298	0.0249	0.762	0.0857	0.382	-0.00215	0.982	0.201	0.0221	0.0891	0.311	0.231	0.0197	0.178	0.0343	-0.0366	6.68	-0.417	0.677	0.956	-0.0754	0.533	-0.0168	0.862	-0.0332	0.718	-0.054	6.68	-0.548	0.584	-0.0322	0.696	-0.0382	0.669
231583_at	121391	KRT74	-0.0315	0.713	0.0497	0.597	-0.229	0.00809	0.0113	0.892	-0.0976	0.326	-0.039	0.682	-0.0562	0.527	-0.0914	0.305	-0.0922	0.357	-0.0837	0.326	0.0957	6.5	1.08	0.282	0.923	0.0296	0.809	0.0178	0.857	0.0291	0.755	0.0766	6.5	0.767	0.443	0.102	0.22	0.0384	0.671
212723_at	23210	JMJD6	0.278	0.0484	0.0424	0.784	0.39	0.00636	0.176	0.198	0.177	0.28	0.307	0.0507	0.0418	0.775	0.124	0.398	0.224	0.175	0.139	0.322	0.0998	6.05	0.682	0.496	1	0.0143	0.943	-0.076	0.639	0.206	0.181	-0.192	6.05	-1.17	0.244	0.133	0.332	0.0629	0.672
214864_s_at	9380	GRHPR	0.201	0.12	-0.176	0.217	0.42	0.00139	0.0458	0.715	0.1	0.505	0.133	0.356	0.25	0.0629	0.051	0.705	0.134	0.377	0.128	0.321	-0.0815	8.21	-0.606	0.545	1	-0.0944	0.611	-0.0371	0.803	-0.107	0.449	0.00752	8.21	0.0498	0.96	0.0258	0.838	0.0577	0.673
231808_at	729082	OIP5-AS1	-0.0833	0.299	-0.141	0.109	-0.242	0.003	-0.129	0.0983	0.0219	0.814	-0.108	0.227	-0.0582	0.485	-0.12	0.152	0.109	0.246	0.0246	0.759	0.0495	4.83	0.593	0.553	0.934	-0.0172	0.881	-0.0183	0.843	-0.0322	0.713	0.0516	4.83	0.551	0.582	-0.0167	0.832	0.0356	0.675
203385_at	1606	DGKA	-0.0504	0.54	0.18	0.0467	-0.22	0.00855	-0.104	0.193	-0.0774	0.419	0.0504	0.583	-0.143	0.0947	-0.0191	0.825	-0.015	0.876	-0.188	0.0222	-0.0568	7.33	-0.663	0.508	1	-0.0562	0.634	-0.0266	0.779	0.0787	0.382	0.0527	7.33	0.547	0.584	-0.0134	0.868	-0.0357	0.682
209389_x_at	1622	DBI	0.246	0.0958	-0.198	0.221	0.408	0.00635	0.188	0.189	0.233	0.174	0.148	0.366	0.367	0.0168	0.1	0.514	0.274	0.113	0.144	0.329	-0.00876	9.58	-0.0571	0.954	1	-0.095	0.653	0.252	0.139	-0.437	0.00673	-0.312	9.58	-1.81	0.0709	0.0241	0.867	0.0638	0.682
212636_at	9444	QKI	0.113	0.483	-0.39	0.0282	0.426	0.00942	0.178	0.257	0.0713	0.704	-0.229	0.204	0.265	0.114	0.126	0.454	-0.0347	0.855	0.164	0.31	-0.239	10.2	-1.42	0.156	1	-0.0318	0.891	0.264	0.157	0.0849	0.63	-0.335	10.2	-1.77	0.0765	-0.139	0.379	0.0693	0.685
212722_s_at	23210	JMJD6	0.121	0.244	0.102	0.372	0.29	0.00606	-0.00206	0.984	0.268	0.0269	0.271	0.0193	0.214	0.0485	0.281	0.00973	0.0788	0.518	0.0334	0.747	0.0636	5.19	0.588	0.556	1	-0.0134	0.928	0.0179	0.881	0.155	0.174	-0.0378	5.19	-0.311	0.756	0.282	0.00564	-0.0442	0.688
222524_s_at	140459	ASB6	0.101	0.239	0.0548	0.561	0.245	0.00488	-0.0121	0.884	0.166	0.0972	0.0888	0.352	0.089	0.318	0.131	0.144	0.0668	0.506	0.0758	0.376	-0.00211	6.61	-0.0236	0.981	0.997	0.0253	0.837	0.0209	0.832	0.055	0.557	0.0576	6.61	0.575	0.565	0.0963	0.251	0.0364	0.688
212719_at	23239	PHLPP1	0.28	0.116	-0.0797	0.684	0.479	0.00797	0.261	0.132	0.249	0.229	-0.018	0.928	0.436	0.0188	0.216	0.245	0.242	0.245	0.172	0.335	-0.0721	7.88	-0.389	0.697	1	0.0601	0.814	0.26	0.204	0.13	0.505	-0.258	7.88	-1.24	0.215	-0.249	0.153	0.0752	0.689
227593_at	729614	FLJ37453	0.176	0.13	-0.0494	0.699	0.32	0.00656	0.0969	0.39	0.119	0.379	-0.0134	0.917	0.286	0.0182	0.063	0.603	0.285	0.0362	0.0078	0.946	-0.0209	6.9	-0.173	0.863	0.98	0.136	0.414	0.0762	0.569	0.0476	0.708	-0.0471	6.9	-0.347	0.729	-0.329	0.00385	0.0467	0.704
223097_at	54936	ADPRHL2	0.0959	0.349	-0.164	0.146	0.309	0.003	0.097	0.33	-0.0397	0.739	0.0542	0.634	0.165	0.122	0.125	0.243	0.198	0.099	0.255	0.0127	-0.148	7.48	-1.39	0.166	0.923	-0.0818	0.577	-0.0563	0.633	-0.00281	0.98	-0.169	7.48	-1.41	0.158	-0.229	0.0222	-0.0411	0.704
201553_s_at	3916	LAMP1	0.164	0.296	-0.151	0.382	0.474	0.00293	0.246	0.107	0.0684	0.708	0.0407	0.816	0.183	0.262	0.0501	0.76	0.18	0.328	0.193	0.218	-0.162	10.7	-0.99	0.323	1	-0.00196	0.993	-0.077	0.67	-0.000842	0.996	-0.134	10.7	-0.733	0.464	-0.0529	0.73	0.0628	0.706
201748_s_at	6294	SAFB	0.239	0.023	0.099	0.391	0.358	0.000798	0.0492	0.629	0.197	0.108	0.15	0.198	0.28	0.0105	0.0851	0.437	0.225	0.0675	0.0798	0.447	0.0422	7.76	0.386	0.7	1	-0.0298	0.843	-0.226	0.0614	-0.0247	0.83	0.145	7.76	1.18	0.237	0.0912	0.375	0.0417	0.707
224333_s_at	64969	MRPS5	0.196	0.0416	0.0599	0.57	0.285	0.00349	0.00425	0.964	0.203	0.0703	0.138	0.196	0.185	0.0639	0.111	0.27	0.234	0.0379	0.134	0.162	-0.0292	8.86	-0.292	0.771	0.965	-0.0852	0.536	-0.151	0.173	0.0639	0.543	-0.0105	8.86	-0.0937	0.925	-0.0104	0.912	0.038	0.709
231959_at	91750	LIN52	-0.0449	0.415	0.0532	0.38	-0.19	0.000694	0.178	0.00096	0.0247	0.7	-0.063	0.305	0.051	0.374	-0.0501	0.384	-0.061	0.346	-0.0431	0.434	-0.0474	7.32	-0.827	0.409	0.923	0.0663	0.402	0.0309	0.627	0.00495	0.935	-0.0108	7.32	-0.167	0.867	-0.0363	0.501	0.0218	0.709
235275_at	656	BMP8B	-0.0241	0.75	-0.0407	0.625	0.234	0.00237	0.128	0.083	-0.103	0.241	0.0418	0.62	0.0519	0.51	-0.00119	0.988	-0.0291	0.743	0.145	0.0559	-0.0952	5.66	-1.21	0.227	0.923	-0.165	0.129	0.133	0.129	-0.0718	0.386	-0.0387	5.66	-0.438	0.662	-0.109	0.143	-0.0295	0.713
204388_s_at	4128	MAOA	-0.0249	0.726	-0.0358	0.646	-0.241	0.000817	0.0342	0.619	0.0238	0.772	-0.077	0.329	-0.114	0.121	-0.109	0.139	-0.161	0.052	-0.0406	0.566	-0.0549	5.42	-0.745	0.456	1	-0.0289	0.776	-0.048	0.556	0.0252	0.744	-0.0957	5.42	-1.16	0.248	-0.0642	0.354	-0.0274	0.715
48106_at	55652	SLC48A1	-0.155	0.117	-0.0721	0.508	0.265	0.00816	0.147	0.126	-0.0288	0.803	-0.0303	0.783	0.164	0.111	-0.00789	0.939	-0.0561	0.628	0.0501	0.612	-0.128	8.73	-1.25	0.213	1	-0.0933	0.511	0.201	0.0779	-0.0349	0.747	-0.168	8.73	-1.46	0.146	-0.0914	0.345	0.0377	0.718
233946_at	55234	SMU1	0.116	0.0925	-0.0242	0.749	0.205	0.00321	0.0746	0.264	-0.0175	0.826	0.0168	0.826	0.161	0.0244	0.127	0.0767	0.104	0.195	0.196	0.00444	-0.0377	4.94	-0.528	0.598	0.942	-0.0242	0.806	-0.0364	0.645	-0.0187	0.804	-0.00367	4.94	-0.0457	0.964	-0.00669	0.921	0.0252	0.729
202116_at	5977	DPF2	0.188	0.0977	-0.122	0.325	0.309	0.00713	0.0334	0.761	0.126	0.337	0.0462	0.714	0.345	0.00348	0.016	0.892	-0.000887	0.995	0.246	0.0295	-0.0896	7.56	-0.761	0.447	1	-0.107	0.512	0.0836	0.521	-0.124	0.317	0.0496	7.56	0.375	0.708	-0.0782	0.48	-0.0413	0.73
210944_s_at	825	CAPN3	0.214	0.396	-0.0242	0.93	0.707	0.00567	0.238	0.331	-0.099	0.735	0.00668	0.981	0.556	0.0339	0.125	0.634	0.23	0.436	0.3	0.234	-0.311	8.29	-1.19	0.235	1	-0.124	0.731	0.0213	0.942	0.165	0.55	-0.184	8.29	-0.624	0.533	-0.286	0.246	0.0905	0.734
205184_at	2786	GNG4	-0.0249	0.762	0.0784	0.385	-0.226	0.00672	0.0131	0.87	-0.0473	0.62	0.0137	0.881	-0.0887	0.298	-0.0537	0.531	-0.175	0.0687	-0.0697	0.395	-0.00928	6.85	-0.109	0.913	1	0.0427	0.716	0.0316	0.738	0.0178	0.843	0.0999	6.85	1.04	0.298	0.116	0.149	-0.0291	0.738
219724_s_at	9840	TESPA1	0.00616	0.958	0.171	0.188	-0.317	0.00795	-0.23	0.0451	-0.0492	0.72	-0.215	0.101	-0.091	0.458	-0.147	0.232	0.189	0.17	-0.148	0.21	-0.0562	6.23	-0.458	0.647	1	-0.0247	0.884	-0.256	0.0596	0.147	0.254	0.00974	6.23	0.0707	0.944	-0.223	0.053	-0.0418	0.738
34260_at	9894	TELO2	0.0305	0.657	0.0491	0.515	0.192	0.0057	0.0925	0.165	0.145	0.0691	0.0846	0.268	0.0839	0.239	-0.0448	0.531	0.00316	0.969	0.116	0.0913	-0.049	6.21	-0.688	0.492	1	-0.0195	0.843	-0.055	0.486	-0.019	0.799	0.00165	6.21	0.0206	0.984	0.167	0.0126	0.0241	0.739
229813_x_at	26528	DAZAP1	0.262	0.04	0.0214	0.879	0.346	0.00746	0.199	0.108	0.106	0.475	0.0428	0.763	0.268	0.0431	0.155	0.244	0.218	0.143	0.123	0.335	-0.0799	6.68	-0.603	0.547	0.934	-0.207	0.256	-0.0911	0.534	0.122	0.381	-0.3	6.68	-2.02	0.0442	-0.157	0.207	0.0446	0.741
215064_at	6309	SC5D	-0.226	0.0384	-0.038	0.751	-0.294	0.00784	-0.0174	0.869	0.0714	0.573	0.0193	0.874	-0.0651	0.566	-0.0231	0.839	-0.0205	0.873	-0.0664	0.542	0.0486	5.5	0.429	0.668	1	0.304	0.0521	0.253	0.0445	0.116	0.329	0.132	5.5	1.04	0.3	0.148	0.166	0.0377	0.744
221042_s_at	79789	CLMN	0.0827	0.48	0.0486	0.705	0.308	0.00937	0.218	0.0553	0.0851	0.531	0.078	0.549	0.114	0.348	-0.0269	0.826	-0.00437	0.975	-0.0173	0.882	-0.224	5.58	-1.84	0.0656	1	0.00806	0.962	0.069	0.608	0.000558	0.997	0.0098	5.58	0.0717	0.943	-0.0397	0.729	-0.0404	0.744
206572_x_at	7639	ZNF85	-0.029	0.597	-0.0549	0.364	-0.144	0.00983	-0.106	0.0483	-0.0195	0.761	-0.109	0.074	-0.137	0.0163	-0.109	0.0566	-0.028	0.664	-0.0441	0.422	0.00972	6.22	0.17	0.865	1	0.0446	0.571	0.121	0.057	-0.0408	0.497	-0.0734	6.22	-1.14	0.253	-0.166	0.00214	0.0184	0.751
211031_s_at	7461	CLIP2	0.278	0.0471	-0.048	0.755	0.403	0.00444	0.0899	0.508	0.271	0.0961	0.101	0.516	0.517	0.000393	0.101	0.49	0.271	0.0985	0.114	0.412	0.0549	8.5	0.378	0.706	1	-0.0224	0.911	0.061	0.705	0.0305	0.842	0.227	8.5	1.39	0.165	-0.0905	0.508	0.0462	0.754
228226_s_at	285971	ZNF775	0.0673	0.489	0.0019	0.986	0.401	5.18e-05	0.0984	0.298	0.0928	0.412	0.217	0.0449	0.094	0.352	0.211	0.0378	0.186	0.102	0.23	0.0179	-0.0327	6.94	-0.323	0.747	0.962	-0.171	0.219	0.0489	0.662	0.0743	0.484	0.193	6.94	1.69	0.0906	0.0102	0.915	-0.0321	0.755
227237_x_at	83858	ATAD3B	-0.117	0.117	0.108	0.188	0.207	0.00626	-0.0386	0.595	-0.00496	0.955	0.0859	0.303	0.0437	0.574	0.212	0.00674	0.0556	0.526	0.178	0.0175	-0.0563	7.15	-0.723	0.47	0.923	0.0292	0.785	0.0898	0.297	0.0581	0.477	0.0871	7.15	0.997	0.319	0.0858	0.241	-0.0247	0.755
231164_at	650655	ABCA17P	0.215	0.0332	-0.0165	0.882	0.27	0.00822	0.00991	0.919	-0.133	0.257	0.104	0.354	0.0311	0.766	0.185	0.0778	0.0926	0.432	0.119	0.236	0.00232	5.13	0.0222	0.982	0.997	-0.0302	0.834	-0.121	0.295	-0.0132	0.904	-0.000774	5.13	-0.00658	0.995	0.0413	0.675	0.0315	0.768
204872_at	7091	TLE4	0.209	0.233	0.0105	0.957	0.512	0.00406	-0.0428	0.802	0.115	0.575	-0.0585	0.765	0.302	0.0989	0.177	0.334	0.373	0.0699	0.251	0.152	-0.0773	8.22	-0.423	0.673	1	0.0652	0.796	0.0266	0.896	0.00817	0.966	-0.161	8.22	-0.784	0.433	-0.468	0.00653	0.0546	0.769
205822_s_at	3157	HMGCS1	-0.135	0.118	0.0419	0.659	-0.235	0.00726	0.0303	0.718	-0.115	0.255	0.0766	0.426	-0.0653	0.467	-0.0723	0.423	-0.165	0.104	-0.132	0.127	0.0725	5.57	0.807	0.42	1	0.0897	0.469	0.115	0.248	0.217	0.0216	0.115	5.57	1.14	0.255	0.0395	0.641	0.0267	0.77
225789_at	116988	AGAP3	0.00995	0.892	0.0246	0.76	0.214	0.0041	0.0863	0.226	0.0281	0.742	0.152	0.0641	0.151	0.0484	0.073	0.341	0.119	0.167	0.0149	0.839	-0.0434	7.51	-0.568	0.57	0.935	-0.0113	0.915	-0.073	0.388	0.0541	0.5	-0.000583	7.51	-0.00679	0.995	-0.0411	0.567	-0.0224	0.773
236594_at	3996	LLGL1	0.0381	0.782	-0.0787	0.604	0.362	0.00978	0.248	0.0647	0.127	0.428	0.0413	0.788	0.285	0.0474	0.198	0.169	0.213	0.189	0.268	0.0521	-0.423	7.75	-2.94	0.00338	0.923	0.0283	0.887	0.000896	0.996	0.127	0.399	-0.016	7.75	-0.0993	0.921	-0.162	0.231	0.0419	0.774
235348_at	84945	ABHD13	0.00371	0.958	-0.0295	0.703	-0.186	0.00909	-0.0368	0.59	-0.0285	0.727	-0.105	0.181	0.151	0.0391	0.000591	0.994	0.0683	0.407	-0.0435	0.535	-0.0868	3.61	-1.19	0.236	0.923	0.0338	0.737	-0.14	0.084	-0.143	0.0631	-0.131	3.61	-1.59	0.112	-0.144	0.0359	-0.0207	0.78
229631_at	144132	DNHD1	0.083	0.222	0.0535	0.474	0.255	0.000225	0.125	0.0578	0.15	0.059	0.136	0.0733	0.276	0.000106	0.0823	0.246	-0.0388	0.626	0.0641	0.345	0.0348	6.14	0.492	0.623	0.946	0.0802	0.411	0.126	0.108	0.172	0.0209	0.167	6.14	2.1	0.0365	0.0646	0.331	0.0192	0.79
211801_x_at	55669	MFN1	-0.101	0.166	-0.106	0.189	-0.208	0.00495	-0.169	0.0176	-0.139	0.103	0.0358	0.66	-0.21	0.00579	-0.0253	0.741	0.0343	0.688	-0.0657	0.368	-0.0946	6.39	-1.24	0.214	1	0.0652	0.534	0.245	0.00367	0.0432	0.588	-0.0812	6.39	-0.951	0.342	-0.209	0.00353	-0.0205	0.791
212835_at	23172	FAM175B	-0.132	0.106	-0.0543	0.545	-0.264	0.00146	-0.0172	0.828	-0.0965	0.309	-0.135	0.136	-0.145	0.0885	-0.0329	0.699	-0.034	0.722	0.00986	0.904	0.0269	5.75	0.317	0.751	1	0.0987	0.399	0.224	0.0174	-0.0196	0.826	0.068	5.75	0.714	0.476	0.022	0.783	-0.0224	0.795
205371_s_at	1629	DBT	-0.0346	0.359	0.0107	0.797	-0.108	0.0049	0.0299	0.414	-0.00454	0.918	0.0231	0.582	-0.00672	0.864	-0.0221	0.574	-0.00631	0.886	0.0109	0.772	0.0691	3.91	1.76	0.0786	1	0.0437	0.419	0.0848	0.0513	0.0408	0.322	0.000312	3.91	0.00707	0.994	-0.0326	0.377	-0.0104	0.795
226871_s_at	84971	ATG4D	0.198	0.0243	-0.0305	0.751	0.293	0.000994	0.117	0.168	0.0225	0.825	0.0879	0.367	0.184	0.0439	0.113	0.216	0.0906	0.377	0.213	0.0151	-0.164	6.66	-1.8	0.0722	0.923	-0.0652	0.604	-0.135	0.182	0.0965	0.313	0.125	6.66	1.22	0.222	-0.00654	0.939	-0.0223	0.809
46256_at	90864	SPSB3	0.172	0.0132	0.0198	0.794	0.226	0.00134	0.0139	0.836	0.177	0.0281	0.0828	0.283	0.0673	0.35	0.0848	0.241	0.0158	0.846	0.0366	0.596	0.0174	8.82	0.242	0.809	1	-0.0426	0.668	0.00387	0.961	0.00971	0.898	0.0717	8.82	0.887	0.376	-0.0195	0.774	-0.0176	0.81
211538_s_at	3306	HSPA2	0.0554	0.8	0.0285	0.906	0.635	0.00435	0.148	0.488	0.0778	0.76	-0.016	0.948	0.799	0.00048	0.243	0.288	0.149	0.561	0.136	0.534	-0.136	9.98	-0.598	0.55	1	0.0703	0.823	0.313	0.215	0.1	0.676	-0.321	9.98	-1.25	0.21	-0.35	0.103	-0.0542	0.815
226487_at	84915	FAM222A	-0.0448	0.735	-0.0951	0.514	0.356	0.00803	0.0606	0.638	0.02	0.897	-0.0221	0.881	0.381	0.00577	0.114	0.408	-0.0326	0.834	0.251	0.0582	-0.283	7.03	-2.06	0.0401	0.923	0.0259	0.891	0.0737	0.629	0.021	0.885	-0.0523	7.03	-0.338	0.735	-0.153	0.239	0.0324	0.817
244673_at	84542	KIAA1841	-0.0131	0.804	0.0402	0.49	0.174	0.00121	0.0683	0.185	-0.0659	0.285	0.119	0.0446	0.0858	0.119	0.00408	0.941	-0.00777	0.9	0.036	0.496	-0.0184	3.5	-0.334	0.739	0.962	0.00451	0.953	-0.00756	0.901	0.0731	0.207	0.0266	3.5	0.43	0.668	0.103	0.0464	-0.0128	0.82
224477_s_at	84309	NUDT16L1	0.176	0.0804	-0.0108	0.922	0.296	0.0037	0.0465	0.633	0.111	0.341	0.231	0.0387	-0.0165	0.874	0.0633	0.546	0.16	0.173	0.122	0.224	-0.132	6.73	-1.26	0.207	0.923	-0.167	0.247	-0.0642	0.579	0.108	0.324	0.166	6.73	1.41	0.158	-0.00261	0.979	-0.0241	0.821
212772_s_at	20	ABCA2	-0.316	0.0724	-0.11	0.57	0.513	0.00396	0.000202	0.999	0.00149	0.994	-0.1	0.608	0.51	0.00528	0.0262	0.886	0.104	0.614	0.00988	0.955	-0.274	8.75	-1.5	0.134	1	-0.0379	0.88	0.0453	0.823	0.0393	0.837	0.0363	8.75	0.177	0.859	-0.276	0.108	0.0417	0.822
212288_at	23048	FNBP1	0.157	0.272	-0.161	0.306	0.439	0.00246	-0.0369	0.79	0.0159	0.924	-0.0261	0.87	0.345	0.0202	0.142	0.341	0.152	0.362	0.103	0.469	-0.108	8.68	-0.726	0.468	1	-0.184	0.369	0.136	0.407	-0.000766	0.996	-0.0625	8.68	-0.374	0.708	-0.233	0.0951	0.0336	0.824
229860_x_at	401115	C4orf48	0.248	0.2	-0.118	0.578	0.714	0.000279	0.218	0.245	0.12	0.593	0.108	0.614	0.211	0.294	0.0219	0.914	0.322	0.155	0.14	0.468	-0.281	8.13	-1.4	0.162	0.923	-0.119	0.669	-0.314	0.158	-0.0215	0.919	-0.153	8.13	-0.678	0.498	-0.13	0.49	-0.0448	0.827
201805_at	5571	PRKAG1	-0.0251	0.729	0.054	0.499	-0.21	0.0043	-0.0459	0.515	-0.0478	0.572	0.0305	0.706	0.0139	0.854	0.00382	0.96	-0.0657	0.44	-0.0401	0.58	-0.00424	8.46	-0.0561	0.955	1	-0.134	0.2	0.223	0.00797	-0.138	0.0835	-0.000631	8.46	-0.00743	0.994	-0.0359	0.613	-0.0168	0.827
224103_at	100132661	LOC100132661	-0.00185	0.987	0.0587	0.64	-0.358	0.00204	0.0332	0.765	-0.0287	0.829	-0.041	0.747	-0.101	0.393	-0.181	0.13	-0.25	0.0622	-0.245	0.0317	0.155	6.54	1.3	0.193	0.923	0.116	0.477	-0.141	0.285	-0.0429	0.731	0.0663	6.54	0.497	0.62	-0.0325	0.771	0.0262	0.828
219594_at	4815	NINJ2	-0.0599	0.73	-0.0184	0.923	0.515	0.00342	0.114	0.499	-0.251	0.214	0.0345	0.858	0.389	0.0313	0.0993	0.583	0.0156	0.939	0.176	0.31	-0.301	7.34	-1.67	0.0958	1	-0.0948	0.703	0.0634	0.751	-0.0241	0.899	-0.15	7.34	-0.738	0.461	-0.267	0.115	-0.0397	0.829
228525_at	4037	LRP3	0.077	0.469	0.164	0.16	0.293	0.00672	0.049	0.636	0.16	0.198	0.0914	0.44	0.122	0.271	0.242	0.0297	0.121	0.332	0.0673	0.526	-0.0517	6.99	-0.467	0.641	0.951	0.024	0.875	-0.081	0.509	0.0582	0.616	0.0729	6.99	0.586	0.558	0.165	0.112	0.0243	0.829
210982_s_at	3122	HLA-DRA	-0.261	0.351	-0.34	0.269	-0.742	0.00897	-0.358	0.188	-0.539	0.0987	-0.463	0.138	0.104	0.721	-0.105	0.721	-0.244	0.458	0.216	0.439	-0.266	7.95	-0.913	0.361	1	-0.862	0.0321	0.0173	0.957	-0.752	0.0142	-0.366	7.95	-1.12	0.264	0.0318	0.907	0.0611	0.837
205132_at	70	ACTC1	-0.0589	0.257	0.0718	0.209	-0.155	0.00333	-0.00111	0.982	-0.119	0.0487	0.0319	0.582	-0.075	0.165	-0.0267	0.623	-0.1	0.1	-0.127	0.0148	-0.0172	7.78	-0.318	0.75	1	0.00528	0.943	0.0555	0.354	0.0489	0.389	0.0216	7.78	0.356	0.722	0.0216	0.671	0.0111	0.84
208647_at	2222	FDFT1	0.312	0.0647	0.066	0.722	0.474	0.00567	0.227	0.166	0.181	0.357	0.0466	0.804	0.237	0.177	0.0897	0.611	0.31	0.117	0.197	0.243	-0.0951	9.18	-0.541	0.589	1	0.0476	0.844	0.0749	0.7	0.0591	0.749	-0.153	9.18	-0.777	0.437	-0.152	0.358	0.036	0.84
207052_at	26762	HAVCR1	-0.033	0.621	0.105	0.151	-0.198	0.00351	0.0887	0.171	-0.0267	0.73	0.124	0.0948	-0.19	0.00618	0.0373	0.592	-0.123	0.115	-0.0441	0.508	-0.0259	4.32	-0.373	0.709	1	-0.0754	0.431	0.0366	0.634	0.0439	0.547	-0.0347	4.32	-0.445	0.656	0.0772	0.237	0.0139	0.844
242761_s_at	147923	ZNF420	0.0698	0.496	0.0339	0.763	0.341	0.00104	0.182	0.0675	0.118	0.324	0.0498	0.662	0.261	0.0146	0.152	0.155	0.0827	0.491	0.0241	0.814	-0.0422	7.21	-0.396	0.692	0.956	0.0954	0.516	-0.123	0.299	-0.12	0.284	-0.189	7.21	-1.58	0.115	-0.111	0.27	0.0201	0.853
228961_at	166968	MIER3	0.168	0.0629	-0.0729	0.462	0.278	0.00244	0.0949	0.279	0.106	0.314	0.0218	0.829	0.22	0.0194	0.209	0.0271	0.231	0.0291	0.0109	0.904	0.0233	4.4	0.248	0.804	0.976	0.0581	0.654	-0.00769	0.941	-0.0645	0.513	-0.291	4.4	-2.76	0.00601	-0.163	0.0654	0.0177	0.853
242550_at	8662	EIF3B	0.0754	0.349	0.0218	0.805	0.281	0.000609	0.00733	0.925	0.0185	0.843	-0.00854	0.924	0.0713	0.395	-0.0336	0.689	0.129	0.171	-0.0267	0.74	-0.124	4.53	-1.48	0.139	0.923	-0.00692	0.952	0.178	0.0552	0.123	0.162	-0.045	4.53	-0.478	0.633	-0.00601	0.939	-0.015	0.86
229227_at	400242	DICER1-AS1	0.224	0.06	-0.125	0.342	0.351	0.00377	0.0803	0.488	0.0814	0.558	0.167	0.209	0.292	0.0187	0.145	0.244	0.161	0.248	0.257	0.0314	-0.181	5.52	-1.46	0.144	0.923	0.0316	0.853	0.0375	0.785	0.0889	0.495	-0.0315	5.52	-0.226	0.821	0.0189	0.871	0.0218	0.863
227421_at	54059	YBEY	0.153	0.0621	0.101	0.262	0.256	0.00213	0.136	0.0892	0.0185	0.846	0.199	0.0299	0.262	0.00218	0.108	0.207	0.129	0.179	0.183	0.0255	-0.124	7.04	-1.46	0.146	0.923	-0.0842	0.474	0.123	0.192	0.0284	0.751	0.161	7.04	1.68	0.0933	-0.0232	0.772	-0.0142	0.87
202251_at	9129	PRPF3	0.184	0.0847	-0.0427	0.716	0.371	0.000632	-0.045	0.665	0.0652	0.6	0.181	0.127	0.168	0.131	-0.0234	0.833	0.217	0.0827	0.0371	0.728	-0.132	5.35	-1.19	0.234	1	-0.147	0.337	-0.0606	0.622	0.126	0.281	-0.0271	5.35	-0.217	0.828	-0.137	0.191	-0.0179	0.874
226093_at	196513	DCP1B	0.00389	0.955	0.0237	0.756	0.244	0.000529	0.0988	0.142	0.0614	0.447	-0.0184	0.812	0.217	0.00269	0.0762	0.292	0.134	0.0988	0.0149	0.829	-0.0586	5.98	-0.813	0.416	0.923	0.122	0.219	-0.117	0.142	-0.0339	0.654	-0.00754	5.98	-0.0931	0.926	-0.0291	0.667	-0.0109	0.882
221681_s_at	1834	DSPP	0.0755	0.328	-0.0782	0.357	0.209	0.0077	0.107	0.154	0.0165	0.854	0.0596	0.488	0.0137	0.865	0.0279	0.729	0.0103	0.91	0.134	0.0821	-0.097	3.96	-1.21	0.227	1	-0.0913	0.41	0.00444	0.96	0.00269	0.975	0.0455	3.96	0.505	0.614	0.0414	0.583	0.0119	0.884
204581_at	933	CD22	0.0869	0.547	0.026	0.87	0.385	0.0085	0.167	0.235	0.201	0.231	0.275	0.0874	0.216	0.149	0.0693	0.645	-0.0153	0.928	0.179	0.214	-0.126	6.97	-0.838	0.402	1	-0.038	0.854	-0.013	0.938	0.286	0.0702	0.0334	6.97	0.198	0.843	0.207	0.143	0.022	0.885
204774_at	2123	EVI2A	0.0849	0.747	-0.206	0.477	0.705	0.00824	0.21	0.412	-0.0541	0.86	-0.168	0.567	0.694	0.0114	0.239	0.385	0.146	0.636	0.297	0.258	-0.107	8.6	-0.389	0.697	1	0.115	0.76	0.126	0.678	0.0121	0.966	-0.433	8.6	-1.41	0.16	-0.421	0.102	0.0393	0.888
203758_at	1519	CTSO	0.016	0.889	-0.118	0.346	-0.305	0.00834	-0.0249	0.822	-0.224	0.0909	-0.175	0.168	-0.0245	0.836	0.0457	0.701	-0.208	0.12	0.102	0.371	-0.105	6.83	-0.885	0.376	1	0.038	0.816	0.0647	0.622	-0.108	0.386	-0.0661	6.83	-0.496	0.62	-0.207	0.0631	-0.0163	0.893
218884_s_at	60558	GUF1	-0.0179	0.707	-0.0387	0.46	-0.157	0.00112	0.00213	0.963	-0.0249	0.653	-0.028	0.597	-0.0433	0.381	-0.0152	0.759	-0.076	0.173	0.0357	0.452	-0.0014	4.43	-0.0283	0.977	1	0.0384	0.574	-0.0223	0.684	0.124	0.0177	0.0297	4.43	0.534	0.594	-0.0256	0.582	0.00675	0.893
228349_at	158405	KIAA1958	0.00289	0.97	0.0591	0.478	0.212	0.00585	0.152	0.0393	0.0128	0.885	-0.0229	0.786	0.198	0.0124	0.114	0.151	0.0262	0.768	0.151	0.0463	0.00506	8.01	0.0641	0.949	0.991	-0.00109	0.992	-0.0016	0.985	0.0565	0.496	0.00936	8.01	0.106	0.916	0.0594	0.424	0.0101	0.9
238066_at	116362	RBP7	-0.0494	0.767	-0.265	0.149	0.488	0.00397	0.207	0.201	-0.167	0.389	0.0231	0.901	0.255	0.141	-0.137	0.432	0.19	0.33	0.0184	0.912	-0.0281	5.95	-0.162	0.871	0.981	-0.0979	0.682	-0.122	0.524	0.0664	0.715	-0.153	5.95	-0.787	0.431	-0.4	0.0143	-0.0207	0.906
227072_at	25914	RTTN	0.0805	0.382	0.147	0.146	0.244	0.00895	0.0995	0.266	-0.0645	0.547	0.0282	0.784	0.257	0.00731	0.078	0.417	0.0374	0.729	0.0413	0.653	-0.0904	6.42	-0.944	0.345	0.923	-0.0448	0.734	-0.0195	0.854	0.0801	0.426	-0.128	6.42	-1.19	0.233	-0.155	0.0858	-0.0113	0.907
201928_at	8502	PKP4	0.333	0.0797	-0.173	0.408	0.524	0.00651	0.33	0.0735	-0.0363	0.869	0.0855	0.686	0.305	0.122	0.107	0.59	-0.0869	0.696	0.15	0.427	-0.0696	8.07	-0.353	0.724	1	-0.112	0.68	0.292	0.182	0.357	0.0852	-0.213	8.07	-0.96	0.338	-0.0928	0.617	0.0232	0.908
226207_at	353116	RILPL1	0.191	0.0714	-0.0597	0.607	0.287	0.00744	0.11	0.282	0.174	0.158	0.204	0.0829	0.263	0.0167	0.146	0.185	0.113	0.359	-0.026	0.805	-0.155	7.96	-1.41	0.158	0.923	-0.0123	0.935	-0.0408	0.737	0.11	0.34	-0.118	7.96	-0.954	0.34	-0.228	0.0278	-0.0126	0.911
215695_s_at	8908	GYG2	0.187	0.0555	-0.0278	0.795	0.327	0.000947	0.278	0.00343	0.253	0.0262	0.265	0.0149	0.31	0.00232	0.166	0.104	0.067	0.557	0.426	1.37e-05	0.0228	4.84	0.225	0.822	1	0.0791	0.571	0.0635	0.572	0.0479	0.652	-0.0382	4.84	-0.336	0.737	0.373	9.96e-05	-0.0112	0.913
223626_x_at	83982	IFI27L2	0.181	0.0893	-0.0251	0.83	0.337	0.00184	0.2	0.0537	0.168	0.177	0.144	0.226	0.37	0.000901	0.235	0.0353	0.0511	0.682	0.34	0.00145	-0.0319	7.88	-0.287	0.774	0.967	-0.134	0.38	0.0275	0.823	0.0245	0.834	-0.0323	7.88	-0.259	0.796	0.221	0.0342	-0.0118	0.917
213618_at	116984	ARAP2	0.298	0.0643	-0.2	0.259	0.457	0.00519	0.115	0.462	0.134	0.475	-0.187	0.298	0.407	0.0154	0.337	0.0454	0.0624	0.741	0.206	0.2	-0.15	7.59	-0.895	0.371	1	0.161	0.487	0.0944	0.611	0.0089	0.96	-0.193	7.59	-1.02	0.307	-0.344	0.0294	-0.0168	0.922
216071_x_at	9968	MED12	0.105	0.211	0.0084	0.928	0.222	0.0096	0.102	0.215	0.0994	0.311	0.152	0.106	0.111	0.206	0.0485	0.582	0.114	0.25	0.142	0.0927	-0.0218	6.87	-0.248	0.804	1	0.0661	0.585	0.0848	0.383	-0.143	0.12	0.0608	6.87	0.617	0.538	0.0224	0.786	-0.00873	0.922
226111_s_at	25946	ZNF385A	-0.0705	0.447	0.138	0.176	0.309	0.00105	0.116	0.199	0.0621	0.566	0.0912	0.378	0.238	0.0139	0.0905	0.35	0.0633	0.561	0.0402	0.665	-0.16	7.62	-1.66	0.0976	0.923	0.096	0.471	-0.0124	0.908	-0.0658	0.516	0.161	7.62	1.48	0.138	0.162	0.0752	-0.00935	0.924
219229_at	28232	SLCO3A1	0.218	0.108	-0.0965	0.517	0.492	0.000352	0.18	0.171	0.141	0.372	-0.0109	0.942	0.325	0.0211	0.118	0.403	0.174	0.272	0.00872	0.949	-0.042	5.66	-0.298	0.766	1	-0.00451	0.981	-0.0399	0.798	0.0327	0.825	0.0165	5.66	0.104	0.917	-0.00972	0.941	0.0136	0.925
223411_at	57409	MIF4GD	0.243	0.0781	-0.146	0.336	0.374	0.00741	0.12	0.369	0.0266	0.868	0.0271	0.86	0.279	0.0515	0.197	0.172	0.0308	0.848	0.175	0.203	-0.181	6.41	-1.26	0.207	0.923	0.129	0.514	-0.0285	0.857	0.024	0.874	-0.0383	6.41	-0.238	0.812	0.004	0.976	0.0127	0.93
219922_s_at	4054	LTBP3	0.2	0.278	0.00393	0.985	0.491	0.00874	0.0725	0.686	0.329	0.126	0.114	0.578	0.706	0.000252	0.0991	0.607	0.386	0.0747	0.169	0.36	-0.0725	6.6	-0.377	0.706	1	0.139	0.598	0.473	0.0265	0.0249	0.902	0.333	6.6	1.54	0.123	-0.0248	0.891	-0.0167	0.932
228928_x_at	54971	BANP	0.101	0.298	0.0407	0.703	0.287	0.00358	0.112	0.237	0.111	0.328	0.19	0.0795	0.199	0.0487	0.152	0.133	0.24	0.0354	0.262	0.00698	0.0666	7.62	0.66	0.51	0.93	-0.0922	0.508	0.0742	0.507	0.0917	0.387	-0.0795	7.62	-0.7	0.484	0.00826	0.931	-0.00857	0.933
210959_s_at	6715	SRD5A1	-0.0701	0.243	0.0436	0.51	-0.183	0.00271	0.0339	0.562	-0.0241	0.731	-0.104	0.12	-0.103	0.1	0.0389	0.535	-0.0269	0.703	-0.00571	0.924	0.0735	4.35	1.18	0.24	1	0.0146	0.865	0.15	0.0306	0.0854	0.193	-0.0107	4.35	-0.153	0.878	-0.0593	0.313	0.0051	0.936
45526_g_at	79903	NAA60	0.166	0.0211	0.0214	0.786	0.211	0.00389	0.0539	0.44	0.0812	0.331	0.0691	0.388	0.0466	0.533	0.0616	0.411	0.0583	0.488	0.125	0.0811	-0.0984	9	-1.32	0.188	1	0.0587	0.569	-0.0652	0.431	0.0677	0.388	0.168	9	2	0.0462	0.065	0.355	-0.00593	0.938
224972_at	140823	ROMO1	0.267	0.131	-0.139	0.473	0.487	0.00646	0.148	0.389	0.0667	0.745	0.14	0.475	0.178	0.333	0.137	0.455	0.25	0.226	0.36	0.0409	-0.173	7.97	-0.94	0.347	0.923	-0.106	0.675	-0.188	0.354	-0.212	0.271	-0.19	7.97	-0.922	0.357	-0.0387	0.823	-0.0141	0.94
236363_at	27258	LSM3	-0.0174	0.773	0.00132	0.984	0.175	0.00432	-0.0237	0.686	0.00967	0.891	-0.0398	0.554	0.00109	0.986	0.0392	0.535	-0.0742	0.295	0.0653	0.28	-0.0745	4.45	-1.18	0.237	0.923	0.0219	0.8	-0.054	0.438	-0.0198	0.764	0.0573	4.45	0.81	0.418	0.0342	0.563	0.0045	0.944
244745_at	85004	RERG	-0.0736	0.459	0.18	0.0998	-0.266	0.00844	-0.15	0.121	-0.0396	0.732	-0.195	0.078	-0.102	0.324	-0.00124	0.99	-0.126	0.278	-0.0114	0.908	-0.18	4.48	-1.74	0.082	0.923	0.0363	0.799	-0.0493	0.667	-0.00076	0.994	-0.347	4.48	-2.99	0.00289	-0.206	0.0341	0.00681	0.948
227535_at	56851	EMC7	-0.0298	0.591	-0.0167	0.784	-0.15	0.00746	0.0278	0.605	-0.0231	0.721	0.0927	0.133	0.0808	0.161	0.00121	0.983	-0.209	0.00132	-0.0935	0.0916	-0.0417	4.63	-0.723	0.47	0.923	0.0511	0.52	0.0241	0.706	-0.0044	0.942	-0.0127	4.63	-0.197	0.844	-0.0775	0.153	0.0036	0.951
222618_at	55234	SMU1	0.0548	0.642	-0.0293	0.822	0.313	0.00899	0.0804	0.484	0.133	0.335	-0.0448	0.734	0.311	0.0116	0.164	0.183	0.278	0.0447	0.142	0.228	-0.0726	7.06	-0.591	0.555	0.934	-0.0703	0.678	-0.198	0.146	-0.0396	0.759	-0.111	7.06	-0.802	0.423	-0.0627	0.587	0.00749	0.952
218188_s_at	26517	TIMM13	0.285	0.0562	-0.126	0.443	0.396	0.00883	0.0947	0.513	0.0815	0.638	0.165	0.322	0.278	0.0731	-0.0249	0.873	0.278	0.111	0.066	0.657	-0.064	6.79	-0.413	0.68	1	-0.231	0.279	-0.191	0.267	-0.234	0.151	0.0977	6.79	0.561	0.575	0.114	0.434	0.00903	0.954
212222_at	23198	PSME4	0.156	0.242	-0.206	0.161	0.375	0.00558	-0.0235	0.857	-0.0761	0.624	-0.0833	0.575	0.118	0.393	0.038	0.785	0.238	0.128	-0.15	0.262	-0.277	7.15	-2	0.0463	1	-0.0624	0.745	-0.125	0.414	-0.109	0.455	-0.208	7.15	-1.34	0.182	-0.338	0.00977	-0.00784	0.956
233168_s_at	83642	SELO	0.119	0.148	0.104	0.25	0.265	0.0015	0.0996	0.212	0.132	0.168	0.127	0.167	0.17	0.0469	0.238	0.00563	0.169	0.0791	0.127	0.122	-0.118	7.7	-1.38	0.168	0.923	-0.0153	0.897	-0.0206	0.828	0.0422	0.638	0.141	7.7	1.47	0.143	0.0849	0.291	-0.0046	0.958
209283_at	1410	CRYAB	0.107	0.598	0.0285	0.898	0.572	0.00546	0.265	0.179	0.127	0.59	0.171	0.449	0.51	0.0158	0.173	0.413	0.0388	0.87	0.231	0.254	-0.208	11.1	-0.988	0.323	1	-0.201	0.489	0.3	0.199	0.184	0.405	-0.314	11.1	-1.33	0.185	0.034	0.864	0.0104	0.961
225270_at	4756	NEO1	0.0597	0.609	-0.189	0.141	0.312	0.00839	0.268	0.0183	0.135	0.321	-0.082	0.528	0.438	0.000326	0.205	0.0929	0.101	0.46	0.176	0.132	-0.189	8.34	-1.56	0.119	0.923	-0.03	0.858	0.113	0.399	-0.0843	0.509	-0.135	8.34	-0.992	0.322	-0.0852	0.455	0.00492	0.968
231567_s_at	84660	CCDC62	0.014	0.816	0.0678	0.308	-0.178	0.00375	-0.0711	0.226	-0.0505	0.473	-0.0794	0.239	-0.0781	0.214	-0.0608	0.335	-0.0504	0.476	-0.0191	0.752	0.0965	6.6	1.53	0.125	0.923	0.106	0.223	0.00784	0.91	0.049	0.458	0.0474	6.6	0.671	0.502	0.0811	0.17	0.00234	0.971
212465_at	84193	SETD3	0.169	0.104	-0.0223	0.845	0.272	0.00988	0.15	0.138	0.0196	0.871	0.0536	0.643	-0.00396	0.971	0.0252	0.816	0.0866	0.477	0.171	0.1	-0.196	7.95	-1.81	0.0704	1	0.0796	0.593	-0.0156	0.896	-0.0511	0.653	0.105	7.95	0.866	0.387	0.0429	0.673	0.00386	0.972
202880_s_at	9267	CYTH1	0.201	0.17	-0.207	0.198	0.414	0.00517	0.0911	0.521	0.0671	0.693	0.0474	0.771	0.502	0.000992	0.00689	0.964	0.1	0.557	0.232	0.111	-0.088	7.39	-0.58	0.562	1	0.0168	0.936	-0.0327	0.846	0.0103	0.949	-0.0546	7.39	-0.32	0.749	-0.0676	0.636	-0.00485	0.975
224814_at	29952	DPP7	-0.00357	0.98	-0.0612	0.694	0.381	0.008	-0.00913	0.947	0.2	0.226	0.068	0.666	0.335	0.0229	0.144	0.329	0.273	0.1	0.0975	0.49	-0.22	7.11	-1.49	0.136	0.923	-0.17	0.403	-0.192	0.24	-0.122	0.432	0.0173	7.11	0.105	0.917	-0.106	0.444	0.00435	0.977
228485_s_at	23446	SLC44A1	-0.166	0.457	-0.0739	0.763	0.609	0.00691	0.255	0.239	0.00555	0.983	-0.0445	0.857	0.967	3.22e-05	0.131	0.574	0.317	0.223	0.296	0.182	-0.241	7.39	-1.04	0.298	0.923	-0.174	0.586	0.0129	0.96	-0.0618	0.799	-0.417	7.39	-1.61	0.109	-0.343	0.115	-0.00551	0.981
220079_s_at	84196	USP48	0.333	0.0373	-0.0792	0.652	0.452	0.00531	0.0257	0.868	0.226	0.225	-0.15	0.399	0.0984	0.554	0.0599	0.72	0.192	0.305	0.0578	0.717	-0.157	8.3	-0.943	0.346	1	-0.0903	0.694	-0.169	0.358	-0.0737	0.673	0.047	8.3	0.251	0.802	-0.239	0.127	-0.00311	0.985
235593_at	9839	ZEB2	0.016	0.898	-0.208	0.129	0.339	0.00736	0.156	0.199	0.064	0.659	-0.0824	0.553	0.371	0.00429	0.0614	0.637	-0.106	0.47	-0.221	0.0766	-0.0986	6.18	-0.76	0.448	0.923	0.0431	0.81	-0.0262	0.855	-0.065	0.633	-0.193	6.18	-1.32	0.186	-0.319	0.00905	0.00232	0.986
209358_at	6882	TAF11	0.326	0.0249	-0.0578	0.717	0.397	0.00697	0.059	0.675	0.0182	0.914	-0.183	0.257	0.223	0.138	0.28	0.064	0.175	0.303	0.0104	0.943	-0.022	4.87	-0.146	0.884	1	0.134	0.518	-0.114	0.495	0.021	0.894	0.0924	4.87	0.546	0.585	-0.152	0.285	0.00234	0.988
228486_at	23446	SLC44A1	0.0672	0.775	-0.0413	0.873	0.733	0.00217	0.346	0.131	-0.0906	0.741	-0.0482	0.854	0.683	0.00543	0.19	0.44	0.169	0.541	0.316	0.179	-0.305	8.88	-1.25	0.213	0.923	0.0428	0.899	-0.18	0.506	-0.018	0.944	-0.593	8.88	-2.15	0.0316	-0.2	0.385	0.0033	0.989
212330_at	7027	TFDP1	0.152	0.0822	-0.0723	0.452	-0.232	0.00873	0.025	0.769	-0.0839	0.409	-0.0559	0.566	-0.0878	0.334	-0.0844	0.355	0.00963	0.925	0.00102	0.991	0.104	7	1.15	0.252	1	-0.098	0.434	0.0824	0.413	-0.0751	0.431	-0.0432	7	-0.423	0.672	-0.0656	0.443	-0.00102	0.991
40446_at	5252	PHF1	0.0895	0.236	0.0412	0.619	0.212	0.00562	0.0538	0.463	0.111	0.206	0.155	0.0656	0.0223	0.776	0.00441	0.955	0.0683	0.44	0.0911	0.227	-0.031	9.34	-0.395	0.693	1	-0.0374	0.729	0.0435	0.616	0.0785	0.341	0.168	9.34	1.9	0.0579	0.133	0.0729	0.00061	0.994
223742_at	51073	MRPL4	-0.00101	0.991	-0.0481	0.607	0.284	0.001	-0.0156	0.85	0.0475	0.631	0.108	0.253	0.0176	0.842	0.0217	0.807	0.126	0.206	0.0104	0.903	-0.0812	6.36	-0.918	0.359	0.923	0.0544	0.656	-0.0718	0.463	0.0641	0.49	-0.0288	6.36	-0.29	0.772	-0.00464	0.956	-0.000676	0.994
209894_at	3953	LEPR	0.152	0.385	-0.0727	0.705	0.00714	0.968	0.491	0.00396	0.108	0.594	-0.125	0.52	0.0881	0.628	0.228	0.211	-0.144	0.482	0.192	0.27	0.221	4.64	1.21	0.225	1	0.221	0.379	0.294	0.144	-0.00373	0.984	-0.098	4.64	-0.48	0.631	0.114	0.504	0.687	0.000213
202409_at	3481	IGF2	0.0525	0.752	0.145	0.429	0.0529	0.754	0.622	0.000133	0.00232	0.99	0.129	0.486	0.0817	0.637	0.269	0.122	-0.106	0.585	-0.0911	0.584	0.185	5.85	1.06	0.287	1	0.339	0.156	0.4	0.0373	0.0907	0.618	0.114	5.85	0.587	0.557	0.386	0.018	0.652	0.000233
200606_at	1832	DSP	0.0181	0.922	-0.15	0.459	-0.0981	0.599	0.61	0.000707	0.0974	0.65	0.109	0.596	-0.0426	0.824	0.0775	0.687	-0.23	0.288	0.162	0.379	0.121	5.65	0.63	0.529	1	0.167	0.529	0.492	0.0209	-0.028	0.889	-0.117	5.65	-0.544	0.586	0.236	0.191	0.714	0.000274
221584_s_at	3778	KCNMA1	0.226	0.0535	0.0672	0.601	0.00955	0.936	0.302	0.00804	0.0891	0.513	0.0242	0.853	0.161	0.186	0.224	0.0671	-0.188	0.17	0.141	0.226	-0.0388	8.03	-0.319	0.75	1	0.298	0.0764	-0.0222	0.869	0.0598	0.64	-0.143	8.03	-1.05	0.296	0.106	0.356	0.407	0.00106
203706_s_at	8324	FZD7	0.109	0.322	-0.125	0.301	0.0333	0.765	0.346	0.00126	0.247	0.0533	0.137	0.265	0.156	0.174	0.0817	0.476	-0.103	0.422	0.567	3.14e-07	0.12	4.85	1.05	0.293	1	0.212	0.178	0.201	0.112	0.0315	0.793	-0.0153	4.85	-0.119	0.905	0.208	0.053	0.377	0.00124
237058_x_at	6540	SLC6A13	0.399	0.0104	-0.00404	0.981	0.235	0.136	0.513	0.000721	0.331	0.0673	0.0248	0.886	0.243	0.133	0.321	0.0481	0.0142	0.938	0.0907	0.559	-0.031	5.96	-0.192	0.848	0.979	0.0768	0.73	0.0155	0.931	0.0948	0.576	0.0601	5.96	0.331	0.741	0.204	0.181	0.525	0.00146
218418_s_at	25959	KANK2	0.303	0.018	0.0473	0.736	0.118	0.361	0.356	0.00425	0.136	0.36	0.242	0.0889	0.17	0.2	0.373	0.0053	-0.0688	0.645	0.335	0.0088	0.167	7.45	1.26	0.21	1	0.114	0.535	0.228	0.121	0.176	0.208	0.185	7.45	1.24	0.215	0.339	0.00679	0.413	0.00232
226506_at	79875	THSD4	0.00351	0.962	0.0428	0.599	-0.0555	0.458	0.23	0.00141	-0.0121	0.888	0.134	0.103	0.0253	0.742	-0.0279	0.717	0.0507	0.558	0.104	0.16	0.0257	7.46	0.334	0.738	0.962	0.0642	0.545	0.0987	0.246	0.0465	0.564	-0.0886	7.46	-1.03	0.305	0.138	0.056	0.23	0.00335
205932_s_at	4487	MSX1	0.231	0.0869	0.0684	0.645	0.225	0.0997	0.349	0.00794	0.581	0.000232	0.108	0.471	0.0724	0.606	0.231	0.101	0.0192	0.903	0.191	0.158	0.223	5.75	1.59	0.113	1	0.22	0.256	0.201	0.198	0.0222	0.88	0.117	5.75	0.743	0.457	0.275	0.0373	0.385	0.00719
213974_at	57188	ADAMTSL3	0.105	0.181	-0.0277	0.747	0.11	0.166	0.246	0.00126	0.0498	0.584	0.0762	0.381	0.00853	0.916	0.0926	0.256	-0.0846	0.355	0.219	0.00508	0.173	4.78	2.13	0.0333	1	0.0511	0.648	0.172	0.0555	0.127	0.136	0.0563	4.78	0.617	0.537	0.0675	0.377	0.213	0.0101
226736_at	91612	CHURC1	-0.451	0.0424	-0.475	0.0521	-0.545	0.0155	-0.647	0.00276	-0.555	0.0317	-0.885	0.000366	-0.122	0.596	-0.609	0.00869	-0.322	0.215	-0.453	0.0412	-0.886	7.72	-3.84	0.000137	0.923	-0.746	0.0193	-0.574	0.0249	-0.526	0.0304	-0.706	7.72	-2.72	0.00665	-0.88	5.55e-05	-0.574	0.0146
228411_at	117583	PARD3B	0.271	0.0148	-0.0421	0.73	0.0866	0.441	0.328	0.00242	0.185	0.153	-0.036	0.771	0.199	0.0856	0.0687	0.553	-0.0141	0.914	0.369	0.000912	0.0554	6.2	0.479	0.632	0.95	0.0983	0.537	0.177	0.167	0.0458	0.706	-0.12	6.2	-0.928	0.354	0.115	0.291	0.285	0.0155
205230_at	22895	RPH3A	-0.0872	0.719	-0.0979	0.713	-0.435	0.076	-0.717	0.00238	-0.0259	0.927	-0.577	0.0326	-0.458	0.0689	-0.511	0.0435	0.276	0.33	-0.689	0.00447	-0.402	8.65	-1.6	0.111	1	-0.477	0.17	-0.562	0.0442	-0.679	0.0105	-0.00854	8.65	-0.0302	0.976	-0.848	0.000366	-0.617	0.0162
202443_x_at	4853	NOTCH2	0.242	0.0794	-0.197	0.194	0.265	0.0578	0.402	0.00283	0.325	0.0431	0.19	0.217	0.181	0.208	0.271	0.0605	0.039	0.809	0.321	0.02	0.175	7.8	1.22	0.223	1	0.0901	0.649	0.45	0.00476	-0.125	0.405	-0.163	7.8	-1.01	0.314	0.173	0.201	0.347	0.0176
226371_at	5927	KDM5A	-0.00611	0.941	-0.0579	0.524	-0.0682	0.416	0.282	0.000472	0.00346	0.971	-0.0391	0.671	0.0126	0.884	0.0551	0.524	-0.101	0.298	0.0109	0.895	0.0422	6.9	0.491	0.624	0.947	-0.186	0.117	0.0108	0.91	0.108	0.234	-0.101	6.9	-1.05	0.295	-0.0193	0.811	0.205	0.0197
208786_s_at	81631	MAP1LC3B	-0.0515	0.744	-0.12	0.491	-0.23	0.151	-0.411	0.00754	0.0395	0.83	-0.206	0.242	0.182	0.268	-0.0835	0.612	0.287	0.12	-0.178	0.26	-0.0256	9.15	-0.156	0.876	1	-0.181	0.425	0.228	0.21	-0.226	0.19	-0.164	9.15	-0.89	0.374	-0.481	0.0019	-0.37	0.027
216877_at	100505498	LOC100505498	0.0438	0.669	0.0775	0.492	-0.086	0.407	0.276	0.00568	-0.189	0.113	-0.000296	0.998	-0.156	0.144	-6.11e-05	1	-0.13	0.278	0.127	0.213	0.0681	5.13	0.639	0.523	1	0.128	0.384	0.0981	0.406	0.234	0.0371	0.201	5.13	1.68	0.0937	0.239	0.0174	0.237	0.0287
204339_s_at	5999	RGS4	-0.373	0.219	0.258	0.44	-0.48	0.119	-0.768	0.00936	-0.165	0.639	-0.473	0.162	-0.248	0.432	-0.135	0.669	0.686	0.0539	-0.559	0.0652	0.173	8.41	0.547	0.584	1	-0.367	0.399	0.416	0.234	-0.0927	0.78	0.282	8.41	0.794	0.427	-0.516	0.0824	-0.683	0.0337
221016_s_at	83439	TCF7L1	-0.0938	0.397	0.187	0.124	0.00855	0.939	0.375	0.00052	-0.0236	0.855	0.148	0.231	-0.119	0.302	0.0299	0.796	-0.196	0.132	0.103	0.352	0.0305	6.76	0.265	0.791	1	0.186	0.242	0.149	0.242	0.321	0.0082	0.166	6.76	1.28	0.202	0.124	0.255	0.245	0.0368
41644_at	23328	SASH1	0.128	0.293	0.00234	0.986	0.233	0.0587	0.338	0.00443	0.12	0.396	0.0475	0.726	0.313	0.0136	0.0782	0.539	0.132	0.356	0.227	0.0624	0.0569	9.82	0.449	0.653	1	-0.0136	0.938	0.444	0.00159	0.12	0.368	0.0765	9.82	0.537	0.591	0.188	0.116	0.268	0.0381
205350_at	1381	CRABP1	0.0248	0.862	0.216	0.167	0.124	0.388	0.494	0.000375	-0.0491	0.767	0.339	0.0328	0.0234	0.874	0.0576	0.698	-0.0871	0.601	-0.0321	0.821	0.0175	5.88	0.119	0.906	1	0.211	0.301	0.188	0.252	0.2	0.198	0.157	5.88	0.947	0.344	0.319	0.0219	0.31	0.0393
218039_at	51203	NUSAP1	-0.0502	0.531	-0.0294	0.739	-0.0908	0.264	0.218	0.00525	-0.0102	0.913	0.0476	0.595	-0.135	0.107	-0.00864	0.918	-0.231	0.0141	-0.0243	0.762	-0.00265	4.91	-0.0317	0.975	1	0.0703	0.542	0.0649	0.483	0.0787	0.37	0.00668	4.91	0.0712	0.943	-0.0022	0.978	0.172	0.0434
222479_s_at	51143	DYNC1LI1	-0.0118	0.912	0.0102	0.931	-0.0601	0.58	-0.288	0.00591	-0.00854	0.945	-0.132	0.27	0.0142	0.899	-0.0772	0.491	0.147	0.242	0.0547	0.61	-0.131	7.36	-1.17	0.241	0.923	0.0208	0.893	0.106	0.391	-0.123	0.295	-0.0144	7.36	-0.115	0.908	-0.26	0.0137	-0.228	0.0449
222651_s_at	7227	TRPS1	0.129	0.268	0.0172	0.893	0.125	0.288	0.324	0.00427	0.22	0.104	-0.116	0.37	0.35	0.00391	-0.0065	0.957	0.08	0.557	0.134	0.248	0.0644	7.82	0.533	0.594	0.942	0.0522	0.754	0.245	0.067	0.0496	0.696	-0.162	7.82	-1.2	0.232	0.201	0.0779	0.246	0.0458
37953_s_at	41	ASIC1	0.0383	0.511	0.145	0.0233	0.0617	0.295	0.156	0.006	0.0055	0.935	-0.0158	0.808	-0.0141	0.815	-0.00362	0.953	-0.0231	0.735	0.123	0.034	0.00554	6.5	0.0914	0.927	1	0.0542	0.516	-0.0458	0.495	0.125	0.0492	-0.00944	6.5	-0.139	0.89	0.0224	0.694	0.123	0.046
227335_at	11083	DIDO1	0.0956	0.261	0.0307	0.743	-0.044	0.609	0.222	0.00724	0.0467	0.637	-0.0942	0.32	0.211	0.0171	0.0477	0.591	0.157	0.115	0.0805	0.343	0.0735	4.32	0.831	0.406	0.923	0.0613	0.615	0.139	0.157	-0.026	0.78	-0.0526	4.32	-0.529	0.597	-0.0492	0.554	0.179	0.0474
231895_at	163786	SASS6	0.0162	0.761	-0.00988	0.866	0.0843	0.119	0.159	0.00231	0.00802	0.897	-0.0673	0.258	0.0705	0.204	0.0326	0.559	-0.018	0.773	0.0687	0.198	0.0263	4.47	0.474	0.636	0.951	-0.00417	0.957	0.00106	0.986	0.0858	0.141	-0.00257	4.47	-0.0412	0.967	0.00789	0.88	0.111	0.0504
243176_at	26225	ARL5A	0.133	0.0721	-0.0197	0.808	0.144	0.054	0.191	0.00782	0.146	0.0888	0.0233	0.777	0.0262	0.733	0.0427	0.579	0.0512	0.553	0.0146	0.843	-0.0718	5	-0.936	0.349	0.923	0.151	0.154	-0.0389	0.646	0.18	0.0256	-0.1	5	-1.16	0.245	-0.0182	0.801	0.15	0.0551
230903_s_at	157695	TDRP	0.136	0.0661	-0.0231	0.777	0.112	0.134	0.194	0.0072	0.126	0.145	-0.00786	0.924	0.176	0.0223	0.0947	0.221	-0.0447	0.606	0.0368	0.619	-0.0142	6.91	-0.184	0.854	0.98	0.155	0.144	-0.161	0.0591	-0.00166	0.984	0.0464	6.91	0.535	0.593	0.0596	0.411	0.147	0.0604
225927_at	4214	MAP3K1	0.169	0.138	0.0438	0.727	0.107	0.355	0.379	0.000651	0.00299	0.982	-0.172	0.174	0.201	0.0907	0.182	0.126	0.0275	0.837	0.375	0.00104	0.0778	6.83	0.656	0.512	0.93	-0.0721	0.659	0.12	0.363	-0.0742	0.552	-0.0789	6.83	-0.592	0.554	0.194	0.0819	0.226	0.0613
228200_at	286101	ZNF252P	0.143	0.0663	0.177	0.0389	-0.00751	0.924	0.211	0.00533	0.16	0.0778	0.034	0.695	0.211	0.00911	0.0978	0.228	0.0948	0.298	0.153	0.0498	0.18	6.45	2.23	0.0262	0.923	-0.0863	0.439	-0.0261	0.771	0.134	0.115	-0.0311	6.45	-0.342	0.732	-0.032	0.674	0.146	0.0759
202192_s_at	8522	GAS7	-0.0235	0.874	-0.108	0.509	-0.0144	0.924	-0.416	0.00409	-0.0792	0.647	-0.128	0.439	-0.0748	0.628	-0.0816	0.599	0.0539	0.757	-0.21	0.157	-0.31	10.3	-2	0.0457	1	-0.135	0.528	-0.259	0.131	-0.142	0.382	0.0187	10.3	0.108	0.914	-0.346	0.0176	-0.273	0.0829
225078_at	2013	EMP2	0.246	0.0188	-0.0658	0.568	0.0975	0.357	0.281	0.00582	0.229	0.0606	0.12	0.305	0.0878	0.42	0.277	0.0113	-0.074	0.546	0.075	0.473	0.00723	7.13	0.0664	0.947	0.99	0.22	0.143	0.0657	0.586	0.138	0.228	-0.0203	7.13	-0.166	0.868	0.000564	0.996	0.182	0.0998
222729_at	55294	FBXW7	-0.213	0.285	-0.0043	0.984	-0.374	0.0643	-0.535	0.00591	0.0675	0.771	-0.324	0.145	-0.032	0.877	-0.28	0.178	0.271	0.246	-0.198	0.319	0.0794	7.63	0.383	0.702	0.957	-0.117	0.682	0.00424	0.985	-0.187	0.391	0.0122	7.63	0.0521	0.958	-0.44	0.0244	-0.344	0.104
204151_x_at	1645	AKR1C1	0.27	0.0665	0.395	0.0147	0.377	0.0114	0.413	0.00391	0.312	0.0678	0.373	0.0228	0.244	0.111	0.178	0.247	0.362	0.0357	0.207	0.157	0.292	8.11	1.91	0.0563	1	0.304	0.149	0.0366	0.829	0.441	0.00609	0.157	8.11	0.913	0.362	0.21	0.145	0.251	0.106
212551_at	10486	CAP2	-0.191	0.491	0.297	0.33	-0.431	0.124	-0.73	0.00688	0.0704	0.827	-0.392	0.204	0.0156	0.957	-0.361	0.212	0.629	0.0531	-0.365	0.187	0.222	8.29	0.77	0.441	1	-0.0256	0.949	0.46	0.15	-0.216	0.476	0.394	8.29	1.22	0.224	-0.657	0.0155	-0.461	0.116
229488_at	56957	OTUD7B	-0.0789	0.262	0.112	0.147	0.133	0.0631	0.213	0.00193	-0.0674	0.411	0.083	0.29	0.108	0.139	-0.0569	0.439	-0.0872	0.29	0.021	0.765	-0.0398	7.34	-0.543	0.587	0.94	0.0248	0.806	-0.0344	0.671	0.0828	0.282	-0.0776	7.34	-0.943	0.346	0.0696	0.312	0.117	0.117
203934_at	3791	KDR	0.0227	0.704	0.0632	0.337	0.0618	0.308	0.211	0.000301	0.0441	0.527	0.0261	0.695	-0.031	0.618	0.055	0.379	0.0387	0.581	0.0395	0.509	-0.0167	5.3	-0.267	0.789	1	0.0235	0.785	0.163	0.0187	0.0439	0.503	-0.000122	5.3	-0.00174	0.999	0.099	0.0914	0.0989	0.119
213644_at	201134	CEP112	0.0622	0.162	-0.0546	0.264	-0.049	0.275	0.12	0.00553	0.0142	0.783	0.01	0.839	-0.0157	0.733	0.0475	0.306	-0.073	0.161	0.0401	0.365	0.0239	4.25	0.518	0.605	1	0.0817	0.2	0.0629	0.219	0.0142	0.77	0.0584	4.25	1.13	0.261	0.0348	0.422	0.073	0.12
206448_at	22891	ZNF365	0.0595	0.822	-0.0329	0.91	0.0106	0.969	-0.667	0.00978	-0.0209	0.946	-0.297	0.314	-0.121	0.661	-0.135	0.626	0.446	0.151	-0.494	0.0622	-0.215	9.01	-0.779	0.436	1	-0.206	0.588	-0.365	0.232	-0.319	0.271	0.0192	9.01	0.062	0.951	-0.702	0.00691	-0.426	0.129
226223_at	5074	PAWR	0.0584	0.621	-0.0748	0.564	0.0952	0.425	0.302	0.00849	0.158	0.249	-0.0105	0.936	0.0106	0.931	0.0788	0.522	0.125	0.365	0.22	0.0617	0.228	4.81	1.86	0.0635	0.923	0.0474	0.779	0.166	0.222	0.0911	0.48	-0.1	4.81	-0.725	0.468	0.0901	0.435	0.189	0.13
210181_s_at	9478	CABP1	-0.261	0.412	-0.109	0.756	-0.326	0.311	-0.837	0.00692	0.285	0.441	-0.479	0.177	0.0201	0.952	-0.196	0.555	0.711	0.0565	-0.572	0.0718	-0.105	7.28	-0.318	0.75	1	-0.413	0.365	-0.118	0.747	-0.324	0.351	0.441	7.28	1.19	0.236	-0.615	0.0483	-0.501	0.137
209212_s_at	688	KLF5	-0.0408	0.599	0.0968	0.257	0.0196	0.803	0.203	0.00722	-0.00774	0.932	0.167	0.0539	-0.0419	0.603	-0.0827	0.308	-0.0651	0.474	-0.0014	0.986	-0.0622	5.68	-0.769	0.442	1	-0.031	0.78	0.0287	0.749	0.143	0.0913	0.119	5.68	1.31	0.189	0.0932	0.22	0.121	0.142
226625_at	7049	TGFBR3	0.124	0.313	-0.128	0.343	0.107	0.39	0.312	0.00902	0.37	0.00956	-0.0678	0.619	0.419	0.00103	0.176	0.168	0.0318	0.824	0.167	0.172	0.069	7.58	0.541	0.588	0.94	0.011	0.95	0.0395	0.779	-0.0464	0.729	-0.382	7.58	-2.67	0.00781	0.0266	0.824	0.19	0.143
227646_at	1879	EBF1	0.256	0.0116	0.124	0.265	-0.09	0.38	0.254	0.00989	-0.018	0.879	-0.169	0.133	0.0481	0.648	0.0135	0.898	-0.064	0.59	0.00806	0.936	0.121	5	1.14	0.253	0.923	0.268	0.065	0.0164	0.889	-0.107	0.336	-0.211	5	-1.79	0.0745	-0.0177	0.858	0.156	0.146
234341_x_at	91548	LOC91548	0.0282	0.634	-0.0163	0.803	0.0144	0.81	0.189	0.00109	0.0148	0.83	0.102	0.123	0.11	0.0744	0.0809	0.191	-0.0776	0.264	0.156	0.0084	0.0118	8.4	0.192	0.848	0.979	-0.123	0.15	0.0158	0.817	0.0958	0.14	0.0419	8.4	0.604	0.546	0.0855	0.141	0.0888	0.157
208737_at	9550	ATP6V1G1	-0.0762	0.689	-0.0424	0.84	-0.363	0.0604	-0.513	0.00581	-0.0854	0.7	-0.276	0.195	0.144	0.468	-0.2	0.315	0.373	0.0955	-0.139	0.467	0.0237	8.23	0.119	0.905	1	-0.084	0.759	0.441	0.0453	-0.33	0.113	-0.25	8.23	-1.12	0.263	-0.337	0.0716	-0.283	0.161
203110_at	2185	PTK2B	-0.0444	0.814	-0.202	0.33	-0.124	0.516	-0.578	0.00168	0.0325	0.882	-0.273	0.194	-0.196	0.318	-0.218	0.267	-0.0121	0.956	-0.343	0.0685	-0.0671	8.38	-0.342	0.732	1	-0.291	0.282	-0.246	0.258	-0.558	0.00685	0.0705	8.38	0.32	0.749	-0.364	0.0489	-0.27	0.176
212859_x_at	4493	MT1E	0.271	0.117	0.051	0.788	0.28	0.109	0.442	0.00863	0.423	0.0356	0.47	0.0147	0.139	0.438	0.229	0.204	0.0831	0.681	0.209	0.226	0.172	11	0.957	0.339	1	0.111	0.655	0.235	0.238	0.0676	0.72	-0.202	11	-0.999	0.318	0.268	0.112	0.247	0.176
212666_at	57154	SMURF1	0.0786	0.328	-0.0606	0.492	0.0259	0.75	-0.203	0.00935	-0.0841	0.368	-0.0882	0.324	0.0578	0.488	-0.00237	0.977	0.00165	0.986	-0.201	0.0125	-0.0371	5.74	-0.444	0.657	1	-0.008	0.945	-0.113	0.22	-0.0403	0.646	0.0461	5.74	0.491	0.623	-0.225	0.0043	-0.114	0.181
230740_at	30845	EHD3	-0.000767	0.991	0.0936	0.211	-0.0409	0.553	-0.189	0.00436	-0.0547	0.49	-0.11	0.147	-0.0563	0.426	-0.0617	0.385	-0.0252	0.752	-0.00866	0.899	0.0771	7.77	1.09	0.276	0.923	-0.0269	0.783	-0.0503	0.521	-0.0525	0.48	-0.0421	7.77	-0.53	0.596	-0.128	0.0548	-0.0953	0.186
212298_at	8829	NRP1	-0.139	0.175	-0.0796	0.482	-0.172	0.0994	-0.267	0.00768	0.183	0.127	-0.0954	0.405	-0.112	0.297	0.0487	0.65	0.0264	0.827	-0.0673	0.512	0.109	4.87	1.01	0.311	1	0.0901	0.541	-0.126	0.289	-0.251	0.0261	-0.234	4.87	-1.95	0.0517	-0.118	0.24	-0.144	0.186
216594_x_at	1645	AKR1C1	0.108	0.387	0.317	0.0212	0.133	0.294	0.316	0.00922	0.21	0.148	0.286	0.0395	0.275	0.0343	0.0419	0.747	0.133	0.361	0.179	0.151	0.223	7.53	1.72	0.0859	1	0.254	0.156	0.0741	0.606	0.234	0.0863	0.19	7.53	1.3	0.193	0.178	0.146	0.173	0.191
203868_s_at	7412	VCAM1	0.0886	0.523	-0.182	0.234	0.0879	0.531	0.357	0.00826	0.0722	0.655	0.105	0.495	0.177	0.219	0.165	0.254	-0.017	0.917	0.241	0.082	0.0778	5.01	0.539	0.59	1	0.164	0.41	0.316	0.0482	-0.0419	0.782	0.0962	5.01	0.594	0.553	0.393	0.00383	0.19	0.196
213675_at	55742	PARVA	0.0666	0.431	0.0614	0.509	0.0349	0.683	0.279	0.000714	0.112	0.256	0.0883	0.349	-0.0362	0.681	0.0697	0.43	-0.0355	0.72	0.146	0.0849	0.0707	6.57	0.804	0.422	1	0.123	0.309	-0.0259	0.79	0.0218	0.814	0.0517	6.57	0.523	0.601	0.154	0.0635	0.116	0.196
200092_s_at	6167	RPL37	0.259	0.0283	-0.126	0.329	0.112	0.35	0.357	0.00657	-0.174	0.206	0.0524	0.69	0.246	0.0795	0.104	0.461	0.114	0.471	0.215	0.0681	-0.212	10.3	-1.51	0.131	0.923	-0.101	0.548	-0.131	0.399	0.0467	0.717	-0.51	10.3	-3.24	0.00127	0.0514	0.697	0.161	0.197
223395_at	25890	ABI3BP	0.056	0.704	-0.0357	0.826	0.17	0.255	0.432	0.00267	0.093	0.588	0.14	0.393	0.374	0.0149	0.126	0.414	-0.013	0.94	0.388	0.00866	0.00113	5.96	0.00739	0.994	0.999	0.309	0.144	0.282	0.097	-0.0535	0.74	-0.0762	5.96	-0.442	0.659	-0.089	0.537	0.2	0.2
210752_s_at	6945	MLX	-0.0277	0.65	0.072	0.284	0.0198	0.749	0.188	0.00164	-0.0295	0.678	0.0645	0.343	-0.0826	0.194	-0.0252	0.693	-0.05	0.485	0.0382	0.532	-0.0255	5.29	-0.401	0.689	1	0.00674	0.939	-0.109	0.122	0.0342	0.609	0.0403	5.29	0.564	0.573	0.124	0.0386	0.0815	0.208
235010_at	729013	ZBED5-AS1	-0.0025	0.979	0.125	0.23	0.0231	0.809	0.247	0.00736	0.0618	0.575	-0.175	0.0965	0.344	0.000496	0.221	0.0252	-0.0649	0.558	0.0811	0.39	0.0969	6.72	0.985	0.325	0.923	0.0862	0.525	0.0116	0.915	-0.0684	0.508	-0.196	6.72	-1.77	0.0764	-0.102	0.271	0.126	0.209
222730_s_at	51201	ZDHHC2	-0.046	0.532	-0.0701	0.386	0.0613	0.41	0.194	0.0067	-0.0621	0.469	-0.00351	0.966	-0.0409	0.593	0.0443	0.564	-0.083	0.336	0.101	0.171	0.0827	6.96	1.08	0.281	0.923	-0.0496	0.638	0.0116	0.891	-0.00491	0.951	-0.0435	6.96	-0.505	0.614	-0.00886	0.902	0.0974	0.211
226673_at	10044	SH2D3C	-0.0958	0.272	-0.157	0.101	-0.145	0.1	-0.253	0.00292	0.0145	0.886	-0.132	0.175	0.0156	0.864	-0.0634	0.486	-0.0394	0.7	-0.117	0.181	-0.128	6.07	-1.4	0.161	0.923	-0.0037	0.976	-0.1	0.318	-0.276	0.00384	0.0681	6.07	0.668	0.504	-0.0664	0.436	-0.115	0.215
39248_at	360	AQP3	0.0186	0.774	0.0515	0.47	-0.0249	0.705	0.166	0.0085	0.17	0.0244	0.0801	0.268	-0.0387	0.567	-0.00977	0.885	-0.078	0.305	0.0487	0.453	0.172	3.97	2.54	0.0111	1	0.0702	0.45	-0.0117	0.876	0.029	0.683	-0.00836	3.97	-0.11	0.912	0.0538	0.397	0.0849	0.216
201083_s_at	9774	BCLAF1	0.00324	0.956	-0.0935	0.15	-0.0289	0.629	-0.159	0.00592	-0.00157	0.982	-0.0484	0.463	0.0459	0.455	-0.0418	0.498	0.0795	0.251	0.0419	0.478	0.031	3.86	0.504	0.614	1	0.0335	0.693	0.11	0.105	0.0339	0.6	0.0926	3.86	1.34	0.181	-0.103	0.076	-0.0772	0.217
230083_at	54532	USP53	0.115	0.24	-0.0919	0.393	-0.144	0.145	0.25	0.00877	-0.0724	0.525	-0.0706	0.517	0.16	0.116	0.0794	0.436	-0.0463	0.686	-0.0763	0.434	-0.018	4.77	-0.177	0.86	0.98	0.0596	0.671	0.0514	0.648	-0.0313	0.769	-0.298	4.77	-2.61	0.0093	-0.183	0.0555	0.126	0.223
200729_s_at	10097	ACTR2	-0.338	0.219	-0.283	0.349	-0.63	0.0238	-0.735	0.00604	-0.157	0.623	-0.512	0.0946	-0.00467	0.987	-0.364	0.205	0.498	0.122	-0.117	0.669	-0.222	6.64	-0.777	0.437	1	-0.261	0.507	0.611	0.0538	-0.438	0.145	-0.225	6.64	-0.702	0.483	-0.667	0.0132	-0.355	0.223
219300_s_at	26047	CNTNAP2	-0.467	0.0254	0.165	0.473	-0.14	0.509	-0.546	0.00728	-0.319	0.189	-0.338	0.146	-0.121	0.578	-0.216	0.321	0.253	0.3	-0.216	0.3	-0.266	6.71	-1.22	0.222	1	-0.0331	0.912	0.115	0.632	-0.319	0.162	0.214	6.71	0.877	0.381	-0.395	0.0531	-0.268	0.225
200982_s_at	309	ANXA6	-0.23	0.12	0.0763	0.639	-0.133	0.373	-0.391	0.00652	-0.043	0.803	-0.202	0.219	-0.103	0.504	-0.0637	0.679	0.308	0.0755	-0.205	0.166	-0.0748	7.87	-0.487	0.627	1	0.207	0.328	0.248	0.145	-0.0958	0.553	0.174	7.87	1.01	0.315	-0.229	0.113	-0.184	0.239
49077_at	51400	PPME1	0.0653	0.467	0.0608	0.538	-0.0208	0.82	-0.234	0.00765	0.043	0.681	-0.0824	0.411	-0.0329	0.724	-0.0598	0.524	0.2	0.0579	-0.182	0.0432	0.0184	8.9	0.197	0.844	1	-0.0509	0.693	-0.0975	0.347	-0.0228	0.816	0.0855	8.9	0.814	0.416	-0.0817	0.353	-0.111	0.244
228040_at	389741	MGC21881	0.118	0.142	0.0445	0.615	0.135	0.0972	0.208	0.00782	0.056	0.549	-0.0556	0.534	0.145	0.0834	-0.0647	0.44	0.0579	0.539	0.0764	0.341	0.0465	7.55	0.556	0.578	0.937	-0.0236	0.837	0.208	0.0249	0.135	0.124	0.129	7.55	1.38	0.169	-0.0331	0.674	0.0964	0.257
213792_s_at	3643	INSR	0.181	0.23	-0.0437	0.792	0.271	0.0769	0.469	0.00143	0.228	0.194	-0.0874	0.603	0.256	0.103	0.0224	0.887	0.253	0.152	0.219	0.146	0.196	7.29	1.25	0.213	1	-0.136	0.53	0.229	0.187	0.125	0.449	0.0817	7.29	0.463	0.644	0.0543	0.713	0.18	0.26
202565_s_at	6840	SVIL	-0.024	0.747	-0.0218	0.79	-0.118	0.117	0.189	0.00897	-0.0601	0.488	0.0248	0.764	-0.0922	0.233	0.14	0.0715	-0.129	0.138	0.0401	0.589	0.0724	4.84	0.935	0.35	1	0.0602	0.572	0.121	0.16	0.0178	0.827	-0.0495	4.84	-0.569	0.57	0.155	0.0336	0.0884	0.261
239648_at	123879	DCUN1D3	-0.0655	0.38	0.00851	0.917	-0.0455	0.547	0.194	0.0077	0.0108	0.901	0.0673	0.418	-0.0269	0.729	-0.115	0.141	-0.0752	0.39	0.0986	0.186	0.103	6.28	1.33	0.184	0.923	-0.0632	0.555	-0.0141	0.87	0.13	0.111	0.117	6.28	1.34	0.18	0.0387	0.596	0.0875	0.268
230826_at	221938	MMD2	0.0766	0.36	0.0484	0.599	0.183	0.0313	0.279	0.000634	-0.0869	0.373	0.0862	0.356	-0.068	0.435	0.0754	0.389	-0.0244	0.803	0.0122	0.884	-0.141	6.78	-1.62	0.107	0.923	0.0319	0.79	0.107	0.268	-0.00791	0.931	-0.00102	6.78	-0.0104	0.992	0.152	0.0635	0.0957	0.28
212259_s_at	57326	PBXIP1	0.059	0.645	0.0971	0.491	0.119	0.359	0.387	0.00194	0.207	0.166	0.106	0.457	0.187	0.16	0.101	0.448	-0.0861	0.566	0.149	0.245	0.0765	8.41	0.574	0.566	1	0.122	0.507	0.376	0.011	0.14	0.319	-0.0377	8.41	-0.252	0.801	0.297	0.018	0.141	0.298
229550_at	57578	UNC79	0.0568	0.557	0.0779	0.464	-0.151	0.124	-0.247	0.0089	-0.0808	0.473	-0.00499	0.963	-0.151	0.135	-0.122	0.227	0.0943	0.406	-0.262	0.00688	-0.00972	7.02	-0.0965	0.923	0.986	0.0471	0.735	-0.192	0.0852	-0.113	0.284	-0.0429	7.02	-0.379	0.705	-0.219	0.0212	-0.103	0.315
236805_at	169436	C9orf96	0.00488	0.943	0.103	0.169	0.069	0.317	-0.181	0.00642	-0.12	0.132	0.158	0.0374	-0.0645	0.363	-0.0457	0.521	-0.049	0.54	-0.0811	0.234	0.0134	5.74	0.189	0.85	0.979	0.0491	0.615	-0.103	0.189	0.024	0.747	0.0228	5.74	0.286	0.775	-0.0337	0.613	-0.0716	0.321
227870_at	57722	IGDCC4	0.276	0.0865	-0.018	0.919	0.246	0.13	0.447	0.00433	0.453	0.0156	-0.0757	0.672	0.734	1.28e-05	0.267	0.112	0.129	0.493	0.315	0.0501	0.0181	6.4	0.108	0.914	0.985	0.215	0.351	0.15	0.416	-0.0922	0.6	-0.307	6.4	-1.63	0.103	-0.0559	0.722	0.164	0.336
206342_x_at	3423	IDS	-0.0692	0.598	0.144	0.317	-0.173	0.194	-0.34	0.00784	0.0529	0.729	-0.113	0.438	-0.0651	0.633	-0.216	0.115	0.16	0.298	0.000649	0.996	-0.0329	7.73	-0.241	0.81	1	-0.0681	0.717	0.00653	0.966	-0.065	0.65	0.105	7.73	0.685	0.493	-0.258	0.0443	-0.128	0.355
213510_x_at	220594	USP32P2	0.236	0.215	-0.305	0.146	0.069	0.721	-0.482	0.00954	-0.0163	0.942	-0.463	0.0296	-0.037	0.852	-0.0316	0.874	0.199	0.372	-0.173	0.363	-0.281	8.33	-1.42	0.157	1	0.0149	0.957	-0.183	0.405	-0.203	0.33	-0.393	8.33	-1.76	0.0783	-0.687	0.000248	-0.184	0.361
213656_s_at	3831	KLC1	0.317	0.034	-0.00857	0.958	0.357	0.0185	0.376	0.00976	0.0118	0.946	0.0707	0.671	0.237	0.128	0.0924	0.554	0.0483	0.783	0.15	0.316	-0.223	7.16	-1.44	0.151	1	-0.149	0.488	0.27	0.117	0.0783	0.631	-0.0223	7.16	-0.128	0.899	0.0217	0.882	0.138	0.384
226029_at	57216	VANGL2	0.276	0.0139	0.027	0.826	0.261	0.0215	0.287	0.00836	0.31	0.0175	0.123	0.325	0.406	0.000512	0.0746	0.523	0.183	0.162	0.258	0.021	0.0682	6.49	0.586	0.558	0.934	0.135	0.399	0.29	0.0246	0.0333	0.785	-0.0537	6.49	-0.411	0.681	0.0598	0.585	0.1	0.398
225276_at	2935	GSPT1	0.177	0.0381	-0.0807	0.39	0.138	0.11	0.228	0.00612	0.201	0.0433	-0.0275	0.772	0.3	0.00077	0.0348	0.696	0.191	0.0566	0.0647	0.447	-0.0676	8.35	-0.761	0.447	0.923	0.022	0.857	0.135	0.171	-0.066	0.479	-0.0304	8.35	-0.305	0.761	0.00129	0.988	0.0752	0.405
228761_at	83482	SCRT1	-0.0408	0.752	0.0379	0.79	-0.103	0.433	-0.346	0.0061	0.00436	0.977	-0.0289	0.841	-0.0186	0.89	0.0902	0.504	0.282	0.0632	-0.156	0.227	-0.0146	6.71	-0.109	0.914	0.985	-0.072	0.698	-0.112	0.454	0.0555	0.695	0.0409	6.71	0.271	0.787	-0.106	0.403	-0.113	0.409
219148_at	55872	PBK	0.0112	0.798	0.0529	0.274	-0.0535	0.229	0.124	0.00374	-0.0609	0.234	-0.000789	0.987	-0.155	0.000747	-0.0401	0.381	-0.057	0.268	0.00789	0.857	0.0704	3.94	1.54	0.123	1	0.0114	0.856	0.000222	0.996	0.0982	0.0409	0.0456	3.94	0.889	0.374	0.0548	0.202	0.0382	0.411
204956_at	4507	MTAP	0.0109	0.75	-0.00849	0.821	-0.0283	0.412	0.0972	0.00343	0.0132	0.739	0.0275	0.469	0.0633	0.0744	-0.0189	0.594	-0.0573	0.151	0.0577	0.0899	0.0446	3.78	1.26	0.209	1	-0.0079	0.871	0.000973	0.98	0.0625	0.0935	-0.0347	3.78	-0.872	0.383	0.0259	0.437	0.0277	0.441
223769_x_at	81888	HYI	0.00381	0.962	-0.0295	0.735	0.134	0.0946	0.224	0.00377	0.028	0.762	0.0895	0.312	0.129	0.118	0.0248	0.765	0.095	0.307	0.215	0.00667	-0.175	7.16	-2.12	0.034	0.923	-0.0204	0.858	0.0525	0.566	0.0637	0.462	0.0774	7.16	0.835	0.404	-0.0017	0.983	0.0642	0.444
240111_at	22836	RHOBTB3	0.0861	0.321	0.00573	0.952	0.125	0.154	0.289	0.000636	0.0364	0.719	0.0123	0.898	-0.102	0.26	0.0643	0.478	-0.0146	0.886	0.0967	0.265	0.103	6.51	1.14	0.253	0.923	-0.117	0.348	0.196	0.0503	0.187	0.0493	-0.0182	6.51	-0.179	0.858	0.15	0.0772	0.0665	0.469
242923_at	339500	ZNF678	0.0782	0.396	-0.186	0.0666	0.12	0.199	0.235	0.009	-0.0814	0.448	0.0134	0.897	0.000392	0.997	0.117	0.225	-0.109	0.313	0.0104	0.91	-0.00473	4.19	-0.0493	0.961	0.993	-0.175	0.185	0.107	0.314	-0.0438	0.664	-0.0979	4.19	-0.908	0.364	-0.0479	0.596	0.0702	0.472
227063_at	254863	TMEM256	0.175	0.123	-0.17	0.174	0.202	0.0796	0.286	0.00978	0.174	0.188	0.0796	0.529	0.238	0.0445	0.153	0.197	0.112	0.401	0.236	0.0374	-0.146	7.21	-1.24	0.216	0.923	-0.121	0.458	0.161	0.22	-0.102	0.413	-0.191	7.21	-1.44	0.15	-0.0579	0.602	0.0802	0.505
209963_s_at	2057	EPOR	-0.00673	0.912	0.0102	0.879	0.0706	0.251	0.177	0.00283	0.0804	0.256	0.139	0.0407	0.0128	0.84	0.0758	0.232	-0.0971	0.173	-0.00229	0.97	-0.0117	5.39	-0.185	0.853	1	-0.0497	0.568	-0.0257	0.713	-0.0612	0.356	-0.00953	5.39	-0.134	0.893	0.0696	0.242	0.0428	0.505
214508_x_at	1390	CREM	0.175	0.0423	-0.0141	0.882	0.046	0.597	0.22	0.00854	0.15	0.134	0.183	0.0559	-0.0431	0.629	0.0387	0.666	0.0274	0.785	-0.00299	0.972	0.193	7.05	2.16	0.031	1	-0.0095	0.938	0.0277	0.779	0.0518	0.581	0.0229	7.05	0.229	0.819	-0.00589	0.944	-0.0567	0.533
212566_at	4134	MAP4	0.187	0.179	-0.169	0.269	0.356	0.0118	0.374	0.00581	0.126	0.437	0.0471	0.761	0.275	0.0577	0.141	0.332	-0.0223	0.891	0.14	0.315	-0.0849	10.4	-0.587	0.558	1	-0.0725	0.716	0.075	0.64	0.0575	0.705	-0.0653	10.4	-0.402	0.688	0.0965	0.478	0.0831	0.572
238823_at	91010	FMNL3	0.00761	0.91	0.068	0.358	-0.119	0.0817	0.169	0.00986	0.106	0.174	-0.0687	0.359	0.0561	0.423	-0.000659	0.993	-0.0924	0.241	-0.0852	0.204	-0.0527	6.47	-0.754	0.451	0.923	0.116	0.23	-0.00671	0.931	0.0542	0.461	0.0266	6.47	0.338	0.735	0.00536	0.935	0.0397	0.576
205411_at	6789	STK4	-0.129	0.0532	0.0998	0.173	-0.0318	0.637	0.169	0.00905	-0.0145	0.852	0.0181	0.807	-0.123	0.0753	-0.00912	0.896	-0.0763	0.328	-0.0221	0.739	-0.000691	5.04	-0.00997	0.992	1	-0.0241	0.801	-0.067	0.382	0.124	0.0894	-0.0183	5.04	-0.235	0.814	0.144	0.0273	0.0385	0.584
224906_at	196527	ANO6	0.142	0.335	-0.0656	0.686	0.018	0.904	0.381	0.00804	0.222	0.196	-0.0575	0.726	0.49	0.00146	0.209	0.175	0.0798	0.644	0.181	0.22	0.0925	6.41	0.603	0.547	0.934	0.195	0.356	0.0854	0.615	-0.0212	0.895	-0.414	6.41	-2.4	0.0165	-0.134	0.353	0.079	0.613
204691_x_at	8398	PLA2G6	-0.125	0.0488	0.0904	0.197	0.0484	0.452	0.206	0.000881	0.0878	0.236	0.101	0.156	-0.0719	0.277	-0.0464	0.484	-0.0144	0.847	-0.0131	0.837	-0.0144	8.15	-0.217	0.828	1	0.124	0.175	0.132	0.0725	0.199	0.00432	0.149	8.15	2.01	0.0453	0.0387	0.533	-0.032	0.635
231430_at	220382	FAM181B	0.000633	0.995	-0.0518	0.627	0.201	0.0411	0.273	0.00388	0.229	0.0424	-0.0325	0.763	0.14	0.165	0.193	0.0574	0.0945	0.405	0.143	0.14	-0.0675	7.35	-0.669	0.503	0.928	0.211	0.129	0.0922	0.409	-0.000809	0.994	-0.121	7.35	-1.07	0.286	0.0349	0.713	0.0486	0.635
225882_at	84912	SLC35B4	0.169	0.0336	0.112	0.199	-0.0182	0.821	-0.2	0.00967	0.0409	0.658	0.00727	0.934	0.0256	0.756	-0.0689	0.405	0.00172	0.985	0.00721	0.927	-0.0437	6.7	-0.53	0.597	0.942	0.138	0.225	-0.0343	0.708	-0.0252	0.771	-0.022	6.7	-0.238	0.812	-0.17	0.0282	-0.0373	0.656
209073_s_at	8650	NUMB	0.133	0.156	-0.129	0.213	-0.0524	0.581	-0.258	0.00478	0.0488	0.655	-0.119	0.257	-0.0272	0.781	0.071	0.469	0.0427	0.698	0.0914	0.33	0.04	5.85	0.409	0.683	1	-0.0608	0.652	-0.0355	0.743	-0.0821	0.424	0.00486	5.85	0.0442	0.965	-0.215	0.0196	-0.043	0.665
235045_at	10179	RBM7	0.117	0.07	-0.0939	0.187	0.021	0.749	0.167	0.00791	0.0447	0.552	-0.0422	0.558	0.0561	0.404	0.0665	0.325	0.00877	0.908	0.121	0.0609	0.099	4.44	1.47	0.142	0.923	0.0301	0.745	-0.00546	0.942	-0.00174	0.98	-0.0394	4.44	-0.521	0.602	0.137	0.0306	0.0263	0.701
235083_at	151009	LOC151009	0.0227	0.739	0.0116	0.877	-0.024	0.728	-0.234	0.000432	0.0357	0.653	0.193	0.0113	0.00121	0.986	-0.0852	0.232	0.00621	0.938	0.0132	0.846	0.0277	6.21	0.39	0.697	0.956	-0.0285	0.771	0.0728	0.354	-0.0162	0.827	0.0366	6.21	0.459	0.646	0.0302	0.651	-0.0272	0.706
213131_at	10439	OLFM1	0.0356	0.896	-0.164	0.584	-0.34	0.216	-0.7	0.00814	0.229	0.47	-0.21	0.488	-0.0313	0.912	-0.229	0.42	0.618	0.0523	-0.527	0.0525	0.0512	9.56	0.181	0.856	1	0.159	0.682	-0.16	0.61	-0.502	0.0912	0.000561	9.56	0.00177	0.999	-0.659	0.0133	-0.107	0.71
224206_x_at	55892	MYNN	0.111	0.18	-0.092	0.312	0.00828	0.921	0.208	0.00989	0.0439	0.648	-0.00532	0.954	-0.046	0.592	-0.0288	0.738	-0.019	0.845	-0.0475	0.565	0.0949	5.28	1.1	0.27	0.923	-0.218	0.0659	0.105	0.271	0.108	0.233	-0.228	5.28	-2.36	0.0184	-0.145	0.0729	-0.0252	0.773
203543_s_at	687	KLF9	-0.0404	0.824	-0.159	0.425	-0.221	0.23	-0.475	0.00737	-0.206	0.331	-0.474	0.0196	-0.0434	0.818	-0.0236	0.901	0.166	0.436	-0.201	0.268	-0.232	5.35	-1.23	0.221	1	-0.105	0.686	-0.16	0.446	-0.106	0.592	-0.378	5.35	-1.78	0.0761	-0.606	0.000684	-0.0521	0.786
236377_at	121256	TMEM132D	-0.0133	0.915	0.124	0.364	-0.078	0.533	-0.313	0.00933	-0.00118	0.993	-0.141	0.308	-0.107	0.404	-0.13	0.313	0.286	0.0486	-0.153	0.216	0.13	7.14	1.01	0.313	0.923	-0.113	0.523	-0.198	0.166	-0.0832	0.538	-0.0729	7.14	-0.504	0.615	-0.302	0.0127	0.0351	0.788
231878_at	79447	PAGR1	0.0381	0.682	0.107	0.297	0.00537	0.954	0.263	0.00373	0.043	0.691	0.0202	0.845	0.0433	0.654	0.0789	0.416	0.164	0.131	0.103	0.269	-0.085	6.33	-0.879	0.38	0.923	-0.045	0.736	-0.186	0.0824	0.149	0.142	0.00548	6.33	0.0505	0.96	-0.129	0.157	0.0243	0.804
222856_at	8862	APLN	-0.0795	0.349	0.128	0.171	0.177	0.0394	0.236	0.00439	0.112	0.257	0.083	0.38	0.259	0.00341	0.132	0.135	0.0659	0.507	0.138	0.104	-0.0215	7.48	-0.243	0.808	0.976	0.0392	0.748	0.129	0.187	0.157	0.0908	0.109	7.48	1.1	0.271	0.127	0.126	0.0204	0.82
215446_s_at	4015	LOX	-0.0454	0.3	-0.0621	0.198	-0.0203	0.648	0.137	0.00133	-0.121	0.0177	-0.063	0.198	-0.0521	0.254	0.0615	0.179	-0.0248	0.629	0.0139	0.751	0.00801	3.94	0.176	0.861	1	-0.0539	0.391	0.0508	0.314	0.042	0.38	0.0106	3.94	0.206	0.837	0.0232	0.589	0.00973	0.834
203955_at	9858	PPP1R26	0.179	0.0164	0.0181	0.825	0.125	0.0972	0.205	0.00482	0.177	0.0415	0.132	0.111	-0.000646	0.993	0.0835	0.283	-0.0441	0.613	0.0576	0.439	0.0529	6.79	0.683	0.495	1	0.0572	0.592	-0.00321	0.97	0.0224	0.783	0.026	6.79	0.299	0.765	0.0907	0.214	-0.015	0.849
225367_at	55276	PGM2	0.15	0.0338	-0.111	0.152	-0.0219	0.759	0.195	0.00449	0.0887	0.28	0.0044	0.955	0.077	0.294	0.0456	0.536	0.0362	0.661	0.0853	0.226	0.0103	4.24	0.141	0.888	0.982	0.0801	0.428	-0.0288	0.723	-0.0135	0.861	-0.0711	4.24	-0.862	0.389	0.121	0.0797	-0.0109	0.884
231947_at	80177	MYCT1	-0.0189	0.73	0.0569	0.346	-0.0317	0.569	0.148	0.00581	0.0607	0.343	-0.00283	0.963	0.142	0.0131	0.048	0.402	-0.0429	0.505	0.0555	0.312	-0.0107	4.34	-0.188	0.851	0.979	-0.0559	0.478	-0.00971	0.878	0.00393	0.948	-0.159	4.34	-2.47	0.0137	0.0156	0.771	-0.00307	0.958
214104_at	23432	GPR161	-0.011	0.886	-0.0169	0.84	0.0223	0.773	0.221	0.00295	-0.0308	0.729	0.0917	0.281	0.00907	0.909	0.0232	0.771	0.0538	0.548	-0.0158	0.836	0.117	4.89	1.47	0.142	1	0.0509	0.642	0.0507	0.564	0.0242	0.771	0.186	4.89	2.09	0.0371	0.0779	0.297	0.00361	0.964
228057_at	115265	DDIT4L	0.206	0.0314	-0.0299	0.776	0.139	0.151	0.119	0.199	0.489	1.29e-05	0.0554	0.603	0.223	0.025	0.224	0.0248	0.00397	0.972	0.275	0.00411	0.135	6.6	1.36	0.175	0.923	0.339	0.0137	0.21	0.0563	0.163	0.119	0.119	6.6	1.06	0.289	0.069	0.46	0.284	0.00504
209987_s_at	429	ASCL1	0.103	0.492	0.211	0.202	0.073	0.631	0.154	0.292	0.476	0.00665	0.107	0.523	0.374	0.0168	0.14	0.372	0.35	0.0472	0.0771	0.607	0.0581	6.2	0.372	0.71	1	0.329	0.127	0.227	0.189	-0.0599	0.715	0.0664	6.2	0.378	0.706	0.337	0.0221	0.41	0.0101
204984_at	2239	GPC4	0.165	0.0289	-0.0645	0.435	0.0218	0.775	0.14	0.0568	0.246	0.00515	0.0515	0.539	0.0791	0.312	0.0874	0.266	-0.0898	0.309	0.016	0.831	0.0324	5.62	0.414	0.679	1	0.106	0.328	0.218	0.0121	0.111	0.178	0.0867	5.62	0.985	0.325	0.0468	0.525	0.186	0.0196
204472_at	2669	GEM	0.357	0.0307	0.274	0.132	0.177	0.288	0.319	0.0472	0.549	0.00435	0.468	0.011	0.306	0.0751	0.572	0.000931	-0.0323	0.867	0.165	0.317	0.381	6.23	2.22	0.0267	1	0.288	0.223	0.261	0.17	0.196	0.277	-0.12	6.23	-0.622	0.534	0.325	0.0443	0.392	0.0249
219824_at	26266	SLC13A4	0.0322	0.872	0.179	0.415	-0.049	0.808	0.127	0.512	0.943	5.33e-05	0.151	0.497	0.114	0.582	-0.0826	0.691	-0.172	0.461	0.0359	0.857	0.449	6.67	2.17	0.0306	1	0.178	0.533	0.225	0.327	-0.259	0.234	0.114	6.67	0.489	0.625	0.283	0.147	0.465	0.0276
209109_s_at	7105	TSPAN6	0.125	0.172	-0.146	0.147	0.0382	0.681	0.146	0.101	0.372	0.000518	0.0492	0.63	0.193	0.0435	-0.00274	0.977	-0.0355	0.742	0.239	0.00937	0.164	6.39	1.72	0.0863	1	0.119	0.364	0.246	0.02	-0.0639	0.524	0.0697	6.39	0.65	0.516	0.143	0.11	0.187	0.0543
222151_s_at	80254	CEP63	0.0152	0.77	-0.0372	0.515	-0.0423	0.42	0.0705	0.162	0.163	0.00699	-0.0683	0.237	0.0461	0.393	0.0781	0.149	0.117	0.0545	-0.0324	0.532	0.00823	4.3	0.152	0.879	1	0.00655	0.93	0.16	0.00761	0.0836	0.141	0.000154	4.3	0.00255	0.998	-0.069	0.174	-0.0952	0.083
219750_at	55314	TMEM144	-0.688	0.0153	-0.458	0.141	-0.467	0.103	-0.511	0.0635	-1.06	0.00138	-0.574	0.069	0.282	0.338	-0.491	0.0972	-0.053	0.873	-0.731	0.0099	-0.4	4.87	-1.36	0.175	1	-0.54	0.184	-0.173	0.596	-0.927	0.00283	-0.3	4.87	-0.905	0.366	-0.86	0.00197	-0.508	0.0899
200795_at	8404	SPARCL1	0.0395	0.714	-0.122	0.306	-0.0809	0.46	-0.165	0.116	0.345	0.00615	-0.0737	0.54	-0.0467	0.678	-0.075	0.506	-0.0107	0.933	-0.184	0.0877	-0.00771	12.2	-0.0686	0.945	1	-0.0817	0.598	-0.00538	0.966	0.0231	0.845	-0.17	12.2	-1.35	0.179	-0.215	0.0422	-0.187	0.103
222240_s_at	51477	ISYNA1	0.205	0.0634	0.233	0.055	0.11	0.324	0.228	0.0331	0.354	0.00589	0.286	0.0199	0.098	0.392	0.19	0.0984	0.0761	0.555	0.0631	0.566	0.156	6.02	1.36	0.173	1	0.245	0.121	0.102	0.422	0.148	0.22	0.247	6.02	1.92	0.0552	0.246	0.0226	0.185	0.113
206691_s_at	64714	PDIA2	-0.0358	0.75	-0.0251	0.839	0.0069	0.952	-0.0471	0.665	-0.357	0.00643	0.0672	0.591	0.0357	0.76	0.0378	0.747	-0.0528	0.688	-0.065	0.562	-0.332	6.76	-2.85	0.00454	1	-0.194	0.227	0.041	0.751	-0.146	0.232	0.0785	6.76	0.599	0.549	-0.109	0.319	-0.182	0.125
205483_s_at	9636	ISG15	-0.12	0.7	-0.715	0.0368	-0.341	0.278	-0.431	0.154	-1.12	0.00206	-0.41	0.236	-0.358	0.269	-0.418	0.198	-0.165	0.651	-0.185	0.551	-0.588	6.91	-1.82	0.0696	1	-0.811	0.069	-0.859	0.0166	-0.946	0.00544	-0.375	6.91	-1.03	0.303	-0.34	0.263	-0.501	0.127
204834_at	10875	FGL2	-0.104	0.238	-0.124	0.203	-0.12	0.181	0.0605	0.481	-0.292	0.00465	0.0604	0.539	-0.16	0.0818	-0.00938	0.919	-0.0766	0.459	-0.051	0.563	0.029	5.27	0.316	0.752	1	-0.119	0.346	-0.0681	0.503	-0.239	0.0136	-0.082	5.27	-0.795	0.427	0.081	0.348	0.136	0.145
201641_at	684	BST2	-0.227	0.218	-0.417	0.04	-0.238	0.203	-0.163	0.364	-0.568	0.00831	-0.151	0.463	0.0529	0.782	-0.135	0.482	-0.307	0.156	-0.13	0.479	-0.313	7.12	-1.63	0.104	1	-0.401	0.13	-0.192	0.367	-0.388	0.0547	-0.27	7.12	-1.25	0.21	0.0536	0.766	-0.271	0.165
203786_s_at	7164	TPD52L1	0.207	0.183	0.0977	0.567	0.261	0.0975	0.186	0.218	0.525	0.00374	0.171	0.323	0.179	0.268	0.181	0.263	0.287	0.115	0.205	0.186	0.207	9.89	1.28	0.199	1	-0.00599	0.979	0.234	0.19	0.0675	0.691	-0.0925	9.89	-0.51	0.61	0.184	0.226	0.217	0.187
209762_x_at	3431	SP110	-0.28	0.0106	-0.306	0.0111	-0.142	0.199	-0.0862	0.418	-0.409	0.00138	-0.264	0.0306	-0.0461	0.685	-0.0631	0.581	-0.263	0.0405	-0.0042	0.969	-0.205	6.56	-1.8	0.0722	1	-0.293	0.0625	-0.0627	0.619	-0.302	0.0119	-0.0676	6.56	-0.528	0.597	-0.0633	0.555	-0.145	0.21
214452_at	586	BCAT1	-0.019	0.677	-0.023	0.647	-0.107	0.0207	-0.00153	0.973	-0.141	0.00802	0.0271	0.594	-0.0271	0.569	-0.0462	0.333	-0.036	0.502	0.00807	0.86	-0.0352	4.02	-0.741	0.459	1	-0.0469	0.475	0.0907	0.0856	-0.0305	0.541	-0.0294	4.02	-0.551	0.582	-0.0155	0.728	-0.0586	0.226
206111_at	6036	RNASE2	-0.147	0.186	-0.238	0.0515	-0.159	0.156	-0.181	0.0926	-0.46	0.000379	-0.145	0.239	-0.154	0.182	-0.000754	0.995	-0.192	0.139	-0.176	0.113	0.00983	5.46	0.0852	0.932	1	0.0213	0.893	-0.371	0.00375	-0.306	0.0116	-0.218	5.46	-1.68	0.0928	0.0367	0.735	0.13	0.268
204041_at	4129	MAOB	0.204	0.193	0.000315	0.999	0.141	0.374	0.148	0.33	0.533	0.00357	-0.0513	0.769	0.363	0.0263	0.22	0.179	0.13	0.48	0.503	0.00137	0.178	9.79	1.09	0.274	1	0.131	0.56	0.217	0.23	-0.0448	0.794	-0.0515	9.79	-0.281	0.779	0.0815	0.595	0.179	0.281
222126_at	3268	AGFG2	0.0263	0.732	0.0651	0.441	0.0691	0.374	0.16	0.0319	0.318	0.000398	0.133	0.119	0.138	0.0843	0.0568	0.479	0.0166	0.854	0.0906	0.238	-0.0106	6.85	-0.133	0.894	1	0.0608	0.581	0.079	0.372	-0.00532	0.949	0.0864	6.85	0.962	0.336	0.0138	0.854	0.0851	0.295
214453_s_at	10561	IFI44	-0.181	0.284	-0.398	0.0322	-0.232	0.174	-0.182	0.268	-0.526	0.00752	-0.35	0.0627	0.057	0.745	0.0449	0.799	-0.146	0.46	-0.113	0.502	-0.195	5.18	-1.11	0.267	1	-0.384	0.113	-0.297	0.127	-0.454	0.014	-0.202	5.18	-1.02	0.307	-0.273	0.098	-0.187	0.296
211799_x_at	3107	HLA-C	-0.325	0.0631	-0.408	0.0342	-0.434	0.0144	-0.29	0.088	-0.639	0.00175	-0.237	0.224	0.0964	0.596	-0.227	0.213	-0.219	0.285	-0.285	0.102	-0.151	8.21	-0.829	0.407	1	-0.405	0.107	-0.314	0.119	-0.487	0.011	-0.448	8.21	-2.19	0.0287	-0.0882	0.606	-0.192	0.298
218032_at	8303	SNN	0.303	0.0317	0.298	0.0548	0.0766	0.591	-0.0914	0.504	0.48	0.00348	0.0839	0.593	0.291	0.047	0.155	0.292	0.523	0.00158	0.117	0.404	0.129	9.54	0.878	0.38	1	0.0346	0.864	0.0274	0.866	0.213	0.166	0.0592	9.54	0.36	0.719	-0.0434	0.752	0.151	0.312
202554_s_at	2947	GSTM3	0.313	0.0953	0.314	0.128	0.0912	0.63	0.18	0.323	0.623	0.00432	0.174	0.404	0.334	0.0864	0.292	0.135	0.424	0.0535	0.0583	0.755	0.112	8.26	0.577	0.564	1	0.0329	0.903	0.302	0.161	-0.0536	0.793	-0.102	8.26	-0.467	0.641	0.198	0.28	0.177	0.373
211366_x_at	834	CASP1	-0.109	0.295	-0.259	0.0239	-0.178	0.0927	0.0146	0.885	-0.386	0.00154	-0.0969	0.404	-0.12	0.27	-0.0303	0.781	-0.16	0.19	0.0498	0.633	-0.0361	5.88	-0.332	0.74	1	0.0347	0.817	-0.0234	0.846	-0.0748	0.512	0.0589	5.88	0.483	0.629	0.199	0.051	0.0947	0.391
233630_at	8760	CDS2	-0.0107	0.856	0.0117	0.857	0.0577	0.337	-0.0127	0.826	-0.201	0.00369	-0.0449	0.497	0.0566	0.359	-0.0766	0.217	0.0619	0.374	0.0189	0.749	0.133	4.62	2.16	0.0314	0.923	0.0701	0.411	0.0375	0.583	0.0948	0.144	0.0227	4.62	0.326	0.744	0.0912	0.117	0.0537	0.393
241766_at	100509303	LOC100509303	0.074	0.26	0.132	0.0667	0.0722	0.277	0.143	0.0255	-0.204	0.00784	0.0932	0.202	-0.135	0.0474	-0.111	0.104	-0.0873	0.256	0.162	0.0139	0.0552	5.5	0.809	0.419	0.923	-0.062	0.51	0.0494	0.513	0.0892	0.213	0.0359	5.5	0.468	0.64	0.166	0.01	0.0593	0.393
232054_at	64881	PCDH20	0.222	0.176	0.222	0.218	-0.128	0.439	-0.0273	0.864	0.522	0.00637	-0.157	0.39	0.233	0.173	-0.0924	0.59	0.163	0.397	-0.0833	0.611	0.124	5.33	0.729	0.466	0.923	0.103	0.661	-0.23	0.223	0.0203	0.91	-0.0996	5.33	-0.52	0.603	-0.217	0.177	-0.146	0.401
229560_at	51311	TLR8	-0.169	0.0416	0.06	0.509	-0.154	0.0665	-0.00407	0.96	-0.271	0.00492	-0.0356	0.699	-0.127	0.141	0.0436	0.613	-0.0619	0.523	0.102	0.215	0.07	4.81	0.813	0.416	0.923	-0.068	0.566	-0.179	0.0608	-0.117	0.196	-0.189	4.81	-1.96	0.0505	-0.0178	0.826	0.0703	0.422
228916_at	143884	CWF19L2	0.132	0.1	-0.0215	0.807	0.0613	0.449	0.107	0.168	0.258	0.00576	-0.0628	0.481	0.208	0.0127	0.00336	0.968	0.0684	0.466	0.0658	0.41	-0.00157	6.32	-0.0188	0.985	0.997	0.0633	0.581	0.107	0.245	0.0556	0.524	-0.106	6.32	-1.13	0.259	-0.0118	0.88	0.0668	0.43
229435_at	169792	GLIS3	0.119	0.357	-0.172	0.227	0.185	0.157	0.221	0.0797	0.446	0.00316	-0.0336	0.815	0.504	0.000191	0.103	0.446	0.151	0.319	0.344	0.00794	0.00829	5.07	0.0615	0.951	0.991	-0.0574	0.757	0.068	0.648	-0.21	0.138	-0.147	5.07	-0.972	0.331	0.0488	0.7	0.102	0.455
202411_at	3429	IFI27	0.114	0.536	-0.437	0.032	-0.125	0.505	0.00598	0.973	-0.643	0.00292	-0.133	0.518	0.0879	0.648	0.107	0.579	-0.272	0.209	-0.118	0.524	-0.231	7.74	-1.2	0.231	1	-0.221	0.405	-0.00851	0.968	-0.435	0.0318	-0.306	7.74	-1.41	0.158	0.106	0.559	-0.144	0.461
239144_at	135152	B3GAT2	0.325	0.0721	-0.229	0.248	0.374	0.041	0.319	0.0694	0.653	0.00193	0.105	0.601	0.929	9.17e-07	0.254	0.178	0.324	0.126	0.462	0.0105	-0.0262	8.41	-0.14	0.889	0.982	0.244	0.345	0.442	0.0338	-0.243	0.218	-0.24	8.41	-1.14	0.256	-0.0265	0.881	-0.139	0.465
209094_at	23576	DDAH1	0.241	0.0472	-0.211	0.114	0.0949	0.44	0.0521	0.659	0.391	0.00574	-0.14	0.301	0.054	0.669	0.0268	0.833	0.0534	0.707	0.00109	0.993	-0.0288	10.7	-0.228	0.82	1	-0.0488	0.779	0.229	0.102	-0.161	0.224	-0.229	10.7	-1.61	0.107	-0.112	0.346	-0.0924	0.472
239297_at	57604	KIAA1456	0.201	0.118	0.209	0.14	0.105	0.421	-0.101	0.42	0.461	0.00218	-0.0198	0.89	-0.0313	0.815	0.064	0.634	0.135	0.37	0.289	0.0247	0.161	7.87	1.2	0.231	0.923	0.0291	0.875	-0.115	0.439	-0.243	0.0845	-0.0815	7.87	-0.541	0.589	-0.0484	0.701	0.0941	0.49
219797_at	11320	MGAT4A	-0.0769	0.325	-0.0199	0.817	-0.0798	0.313	0.127	0.0962	-0.26	0.00437	-0.0739	0.396	-0.074	0.363	0.00686	0.933	-0.0316	0.73	0.00769	0.922	0.0755	4.44	0.928	0.354	1	0.00667	0.953	0.0168	0.852	-0.0244	0.775	0.144	4.44	1.58	0.115	0.0304	0.691	0.0537	0.516
227629_at	5618	PRLR	0.0412	0.764	0.142	0.346	0.0198	0.886	-0.00395	0.976	0.623	0.000102	0.0541	0.723	-0.0445	0.755	0.018	0.9	-0.0632	0.694	0.0838	0.54	0.213	4.52	1.49	0.136	0.923	0.0869	0.658	0.0644	0.683	-0.246	0.1	-0.0322	4.52	-0.201	0.841	0.0437	0.744	0.091	0.53
205139_s_at	10090	UST	0.111	0.293	0.119	0.307	-0.193	0.071	0.024	0.815	-0.323	0.00875	-0.0991	0.399	-0.0326	0.767	-0.0062	0.955	0.0546	0.658	0.149	0.158	-0.000181	5.31	-0.00165	0.999	1	0.169	0.264	-0.155	0.201	-0.0371	0.747	-0.0924	5.31	-0.749	0.454	-0.0273	0.791	0.0697	0.532
219014_at	51316	PLAC8	-0.281	0.0461	-0.311	0.0447	-0.225	0.114	-0.0829	0.544	-0.451	0.00601	-0.247	0.114	-0.34	0.0204	-0.153	0.297	-0.272	0.0982	-0.0255	0.856	-0.212	6.31	-1.45	0.147	1	-0.0804	0.69	-0.23	0.156	-0.227	0.139	-0.156	6.31	-0.948	0.344	0.139	0.31	-0.092	0.536
231981_at	5618	PRLR	-0.0151	0.881	0.0449	0.688	-0.00179	0.986	0.0123	0.901	0.352	0.003	-0.0635	0.574	-0.0369	0.727	0.025	0.813	-0.0919	0.44	0.201	0.0481	0.294	5.27	2.78	0.00558	0.923	-0.0125	0.931	0.0371	0.751	-0.186	0.0945	0.115	5.27	0.971	0.332	0.108	0.275	0.0643	0.549
225707_at	151188	ARL6IP6	0.14	0.0539	-0.131	0.0993	0.0411	0.575	0.091	0.197	0.281	0.000908	-0.0377	0.641	0.199	0.00831	-0.00955	0.899	0.00203	0.981	0.0543	0.453	0.0277	4.95	0.368	0.713	0.961	0.109	0.293	0.0652	0.435	-0.182	0.0217	-0.253	4.95	-2.99	0.00293	-0.0043	0.952	0.0444	0.562
206018_at	2290	FOXG1	0.358	0.0642	-0.137	0.518	0.124	0.526	-0.296	0.115	0.628	0.00532	-0.00292	0.989	-0.00567	0.977	-0.023	0.909	0.36	0.112	-0.0918	0.634	0.00807	8.4	0.0402	0.968	1	0.0287	0.917	0.013	0.953	0.167	0.429	0.0645	8.4	0.286	0.775	-0.23	0.225	-0.116	0.57
240770_at	134285	TMEM171	-0.0525	0.281	-0.031	0.563	0.0537	0.276	-0.0102	0.83	-0.201	0.000415	0.0329	0.545	-0.00413	0.935	-0.0294	0.563	-0.0351	0.539	-0.0634	0.193	0.054	3.93	1.06	0.288	0.923	0.0596	0.394	-0.0074	0.895	0.106	0.0476	0.0157	3.93	0.275	0.784	0.0278	0.56	-0.0291	0.573
207443_at	7101	NR2E1	0.304	0.0199	-0.141	0.325	0.0378	0.775	0.152	0.229	0.444	0.00353	0.0722	0.619	-0.152	0.262	0.181	0.185	-0.0506	0.741	-0.142	0.274	-0.0547	6.99	-0.403	0.687	1	0.242	0.197	0.268	0.075	-0.0398	0.78	-0.165	6.99	-1.08	0.278	0.00718	0.955	0.0742	0.591
204971_at	1475	CSTA	-0.139	0.0826	-0.196	0.0263	-0.106	0.192	-0.0257	0.74	-0.356	0.00014	-0.00839	0.925	-0.0748	0.368	-0.159	0.0573	-0.237	0.0114	-0.0909	0.255	-0.0825	4.66	-0.992	0.322	1	-0.0342	0.766	-0.173	0.0604	-0.144	0.0993	-0.0723	4.66	-0.775	0.439	0.0121	0.877	-0.0368	0.664
209970_x_at	834	CASP1	-0.211	0.0263	-0.164	0.117	-0.159	0.0984	-0.0128	0.89	-0.372	0.000794	-0.0544	0.607	-0.117	0.237	-0.0828	0.404	-0.22	0.0483	0.0112	0.906	-0.0279	5.83	-0.283	0.778	1	-0.0947	0.487	-0.157	0.152	-0.0662	0.524	-0.00355	5.83	-0.032	0.975	0.148	0.11	0.0395	0.694
220551_at	57084	SLC17A6	-0.0397	0.88	0.311	0.283	-0.0112	0.966	0.0244	0.924	-0.914	0.00297	-0.306	0.297	-0.0281	0.918	-0.0382	0.89	0.438	0.156	-0.412	0.118	0.203	5.64	0.741	0.459	1	0.0335	0.929	-0.443	0.145	-0.337	0.243	-0.217	5.64	-0.706	0.481	-0.374	0.147	0.0964	0.729
241866_at	9194	SLC16A7	-0.0718	0.183	-0.0214	0.717	0.0861	0.115	0.0357	0.495	-0.167	0.00783	0.041	0.495	-0.0116	0.837	-0.0333	0.553	-0.0402	0.524	0.0196	0.716	0.032	3.54	0.571	0.568	0.935	-0.000582	0.994	0.00586	0.925	0.0655	0.266	0.142	3.54	2.26	0.024	-0.00559	0.916	0.0195	0.732
209618_at	1501	CTNND2	0.284	0.0694	-0.127	0.46	0.153	0.333	-0.0442	0.771	0.484	0.0079	-0.1	0.564	0.208	0.201	0.0241	0.883	0.126	0.491	0.173	0.268	0.102	8.47	0.625	0.532	1	0.0352	0.875	0.35	0.0524	0.129	0.449	-0.191	8.47	-1.05	0.295	-0.276	0.0707	-0.0418	0.8
218610_s_at	55313	CPPED1	0.0124	0.75	-0.0426	0.318	0.0343	0.383	0.000704	0.985	-0.131	0.00395	-0.0258	0.551	-0.0162	0.688	0.00955	0.814	0.0367	0.42	0.00327	0.933	0.00942	4.08	0.233	0.816	1	0.00564	0.919	0.0699	0.118	-0.0836	0.0491	0.0163	4.08	0.359	0.72	0.0109	0.774	-0.0102	0.804
242223_at	100996494	LOC100996494	-0.033	0.619	0.0712	0.33	0.127	0.0598	0.0166	0.797	-0.242	0.00176	0.182	0.0141	-0.0675	0.328	0.00215	0.975	-0.0714	0.358	-0.0561	0.397	0.036	7.43	0.521	0.603	0.942	0.0557	0.558	-0.029	0.704	-0.00517	0.943	0.0799	7.43	1.03	0.303	0.0615	0.343	0.00933	0.894
205847_at	64063	PRSS22	-0.0506	0.483	0.152	0.0556	0.0966	0.186	0.0605	0.388	0.222	0.0083	-0.0169	0.833	-0.0368	0.624	0.066	0.38	-0.0194	0.819	-0.0852	0.237	0.0488	6.09	0.65	0.516	1	0.0871	0.4	-0.0154	0.852	0.0785	0.319	0.112	6.09	1.33	0.185	0.112	0.112	0.0101	0.895
237179_at	55251	PCMTD2	-0.0284	0.667	0.0851	0.241	0.0619	0.353	-0.079	0.218	-0.2	0.00938	0.104	0.158	-0.0661	0.335	0.0121	0.86	0.0269	0.728	0.0729	0.268	-0.0307	4.57	-0.448	0.654	0.955	0.0703	0.457	0.108	0.154	0.0616	0.392	0.117	4.57	1.52	0.129	0.104	0.105	0.00776	0.911
212126_at	23468	CBX5	0.201	0.0373	0.0969	0.36	0.179	0.0665	-0.0388	0.678	0.33	0.00334	-0.0613	0.567	0.282	0.00496	0.00287	0.977	0.134	0.234	0.188	0.0505	-0.0224	8.88	-0.224	0.823	1	0.0684	0.62	0.0622	0.575	-0.0396	0.706	0.0429	8.88	0.382	0.703	0.0156	0.868	-0.00912	0.929
205394_at	1111	CHEK1	-0.000895	0.984	0.0136	0.786	-0.0264	0.567	0.0805	0.07	-0.163	0.00221	-0.0207	0.683	-0.0571	0.229	-0.0174	0.716	-0.103	0.0547	0.0333	0.466	0.028	3.89	0.589	0.556	1	0.0145	0.824	0.0365	0.488	0.0482	0.334	0.0157	3.89	0.295	0.768	0.0847	0.0581	-0.00324	0.947
210785_s_at	9473	THEMIS2	-0.0868	0.461	-0.252	0.0522	-0.0268	0.822	-0.029	0.8	-0.37	0.00709	-0.0602	0.646	0.0916	0.454	-0.212	0.0851	-0.139	0.315	-0.0547	0.642	-0.141	6.06	-1.15	0.25	1	-0.256	0.13	-0.145	0.286	-0.0667	0.604	0.0231	6.06	0.168	0.867	0.0352	0.76	0.00563	0.964
219734_at	54847	SIDT1	0.0245	0.777	-0.0606	0.524	-0.183	0.0366	-0.0643	0.444	-0.121	0.227	-0.312	0.00122	-0.153	0.0883	-0.089	0.324	0.0952	0.347	-0.153	0.0754	0.0672	5.1	0.748	0.455	1	0.0168	0.892	-0.00568	0.954	-0.013	0.89	-0.0239	5.1	-0.236	0.813	-0.296	0.000476	-0.222	0.0154
219196_at	29106	SCG3	0.0322	0.884	-0.14	0.563	-0.557	0.0128	-0.545	0.0111	-0.0315	0.902	-0.656	0.00767	-0.237	0.301	-0.294	0.202	0.131	0.611	-0.442	0.045	-0.372	6.3	-1.62	0.106	1	-0.23	0.467	-0.147	0.563	-0.219	0.364	-0.483	6.3	-1.87	0.0613	-0.614	0.00454	-0.552	0.0182
214751_at	90333	ZNF468	0.0736	0.107	-0.0125	0.804	-0.0158	0.733	0.0124	0.779	-0.0784	0.14	-0.141	0.00559	0.0765	0.107	0.0582	0.222	0.027	0.614	0.0867	0.0574	-0.00531	4.03	-0.112	0.911	1	0.0311	0.634	-0.053	0.314	-0.0315	0.528	-0.011	4.03	-0.207	0.836	0.0265	0.553	0.11	0.0225
238127_at	650669	GAS6-AS1	0.067	0.248	0.0564	0.377	0.116	0.0492	0.068	0.228	-0.0894	0.185	0.184	0.00454	-0.0682	0.258	0.0203	0.738	-0.00113	0.987	0.0625	0.28	-0.0659	3.72	-1.09	0.275	0.923	0.0187	0.822	-0.0765	0.252	0.0863	0.173	0.0108	3.72	0.16	0.873	0.0273	0.63	0.135	0.0276
204176_at	27252	KLHL20	0.0592	0.445	-0.0946	0.266	-0.0265	0.735	0.0479	0.524	-0.0481	0.593	-0.314	0.00029	-0.0178	0.825	0.136	0.0914	0.167	0.0659	0.183	0.0182	0.0819	4.32	1.02	0.309	1	0.0775	0.485	0.0521	0.559	-0.0596	0.481	-0.168	4.32	-1.86	0.0634	-0.116	0.125	0.178	0.0302
216958_s_at	3712	IVD	-0.0346	0.693	-0.101	0.293	-0.105	0.236	-0.077	0.367	-0.0829	0.417	-0.265	0.00682	-0.0226	0.804	-0.104	0.256	0.0505	0.623	-0.0829	0.344	-0.183	5.73	-2.01	0.045	1	-0.0178	0.887	0.177	0.0796	-0.0824	0.39	-0.0369	5.73	-0.36	0.719	-0.365	2.37e-05	-0.201	0.0306
219673_at	254394	MCM9	-0.0648	0.376	-0.0843	0.295	-0.0907	0.221	0.119	0.0939	-0.0453	0.594	-0.223	0.00626	-0.165	0.0309	-0.023	0.763	-0.0881	0.304	0.124	0.089	0.0196	4.23	0.258	0.797	1	-0.0604	0.565	0.094	0.265	0.0039	0.961	0.0922	4.23	1.08	0.281	-0.00833	0.907	0.163	0.0356
241348_at	55279	ZNF654	0.101	0.204	-0.0561	0.523	-0.0319	0.693	-0.0421	0.587	0.0367	0.693	-0.244	0.00619	-0.0109	0.895	-0.0749	0.369	0.0679	0.468	-0.0888	0.266	0.00606	5.02	0.0729	0.942	0.989	0.0424	0.711	-0.276	0.00281	-0.055	0.528	-0.0991	5.02	-1.06	0.289	-0.0906	0.246	0.171	0.0432
219305_x_at	26232	FBXO2	0.368	0.0193	0.241	0.164	0.319	0.0448	0.201	0.189	0.342	0.0617	0.46	0.00875	0.485	0.00307	0.177	0.281	0.358	0.0519	0.329	0.0361	0.124	8.55	0.761	0.447	1	0.145	0.52	0.0681	0.707	0.174	0.312	0.27	8.55	1.47	0.141	0.301	0.0503	0.329	0.0481
230592_at	25936	NSL1	-0.149	0.106	-0.125	0.22	-0.0116	0.901	0.0344	0.702	0.0472	0.66	-0.296	0.00405	0.028	0.77	-0.0741	0.442	0.0112	0.917	0.0597	0.518	0.0916	4.98	0.954	0.34	0.923	-0.0398	0.764	-0.00695	0.948	-0.191	0.0589	0.0553	4.98	0.512	0.609	-0.196	0.0305	0.188	0.0543
230624_at	9481	SLC25A27	-0.0731	0.725	0.068	0.766	-0.321	0.127	-0.317	0.117	-0.117	0.629	-0.604	0.00922	0.0455	0.833	-0.0685	0.752	0.177	0.468	-0.362	0.0815	-0.141	6.26	-0.653	0.514	0.93	-0.242	0.417	-0.554	0.0208	-0.374	0.0994	-0.518	6.26	-2.13	0.0333	-0.831	4.8e-05	-0.42	0.056
233815_at	10003	NAALAD2	0.149	0.0368	0.0326	0.678	-0.0143	0.843	0.0121	0.861	0.11	0.184	0.263	0.000981	-0.0137	0.853	0.00989	0.894	-0.107	0.2	-0.258	0.000311	0.099	5.05	1.34	0.182	0.923	-0.012	0.906	-0.182	0.027	0.151	0.0523	0.00434	5.05	0.0521	0.958	-0.0509	0.465	0.14	0.0629
218878_s_at	23411	SIRT1	0.184	0.0919	-0.0767	0.523	0.151	0.173	0.14	0.188	0.0805	0.526	-0.321	0.00842	0.0376	0.74	0.192	0.093	0.0037	0.977	0.135	0.216	0.0307	5.93	0.27	0.787	1	0.206	0.189	0.174	0.167	0.0239	0.841	-0.117	5.93	-0.915	0.361	-0.269	0.0118	0.212	0.067
214012_at	51752	ERAP1	-0.0893	0.0686	-0.123	0.0227	-0.0737	0.137	-0.0973	0.0412	-0.142	0.013	-0.195	0.000372	-0.0292	0.566	0.0151	0.767	0.0192	0.737	-0.0478	0.329	-0.0196	3.79	-0.386	0.7	1	-0.0371	0.597	-0.0557	0.324	-0.134	0.0123	-0.0756	3.79	-1.32	0.187	-0.0703	0.142	-0.094	0.0697
239660_at	57186	RALGAPA2	-0.0896	0.197	-0.0722	0.345	-0.0999	0.156	0.0112	0.869	-0.0564	0.486	-0.204	0.00862	-0.0963	0.183	-0.0725	0.317	-0.0792	0.331	-0.0235	0.735	-0.174	5.46	-2.4	0.0166	0.923	-0.0476	0.633	0.203	0.0114	-0.0455	0.549	-0.109	5.46	-1.35	0.178	-0.117	0.0844	-0.13	0.0761
223991_s_at	2590	GALNT2	-0.109	0.223	-0.0282	0.775	0.122	0.181	0.0476	0.585	-0.0794	0.447	0.259	0.00961	-0.0508	0.586	0.0657	0.483	-0.0298	0.777	-0.0514	0.566	0.106	5.14	1.14	0.257	0.923	-0.022	0.864	0.1	0.333	-0.0212	0.829	-0.0263	5.14	-0.251	0.802	0.101	0.249	-0.168	0.0775
231940_at	57711	ZNF529	0.0458	0.759	-0.205	0.212	-0.177	0.243	-0.311	0.0326	0.0439	0.8	-0.458	0.00601	0.0816	0.599	0.00409	0.979	0.169	0.334	-0.166	0.267	-0.23	7.2	-1.48	0.14	0.923	0.0409	0.849	-0.341	0.0479	-0.315	0.0542	-0.337	7.2	-1.93	0.0544	-0.491	0.000811	-0.272	0.0851
230426_at	1738	DLD	-0.136	0.272	0.128	0.347	-0.139	0.266	-0.144	0.229	-0.114	0.429	-0.371	0.00721	0.0766	0.551	-0.145	0.261	0.199	0.17	-0.0547	0.657	-0.0959	6.56	-0.745	0.456	0.923	-0.00825	0.963	0.0782	0.583	-0.109	0.419	-0.0574	6.56	-0.397	0.692	-0.253	0.037	-0.222	0.09
218307_at	55316	RSAD1	0.149	0.0626	0.177	0.0439	0.104	0.198	0.0515	0.507	0.135	0.146	0.236	0.00811	0.107	0.197	0.0746	0.371	0.0915	0.328	0.07	0.38	0.0551	7.65	0.663	0.507	1	-0.0255	0.824	-0.0426	0.643	0.195	0.0257	0.0523	7.65	0.56	0.575	-0.046	0.556	0.143	0.0903
208292_at	27302	BMP10	-0.0847	0.266	0.0871	0.298	-0.117	0.13	0.023	0.756	0.0216	0.807	0.28	0.000999	-0.0961	0.224	-0.00815	0.918	-0.162	0.069	-0.039	0.607	0.0277	5.73	0.35	0.726	1	0.101	0.352	-0.148	0.0925	0.178	0.0329	0.0498	5.73	0.56	0.576	0.0466	0.531	0.134	0.0966
218486_at	8462	KLF11	0.0741	0.318	-0.0247	0.762	-0.00202	0.979	0.00302	0.967	-0.12	0.164	-0.246	0.00302	-0.114	0.139	0.0901	0.244	-0.152	0.0813	0.14	0.0594	-0.0539	5.45	-0.698	0.485	1	-0.0343	0.747	0.0733	0.391	-0.107	0.187	-0.0726	5.45	-0.838	0.402	0.0039	0.957	0.129	0.1
202331_at	593	BCKDHA	0.153	0.035	-0.00636	0.936	0.0713	0.332	0.0471	0.504	0.0243	0.774	0.223	0.00602	0.107	0.158	0.0416	0.583	-0.0499	0.557	-0.145	0.045	-0.0494	7.52	-0.655	0.513	1	0.0316	0.761	-0.0036	0.966	0.0473	0.551	0.109	7.52	1.29	0.198	0.104	0.142	-0.124	0.106
219231_at	96764	TGS1	-0.00224	0.974	-0.00645	0.933	0.00277	0.969	0.0237	0.726	-0.0349	0.667	-0.239	0.00214	-0.0478	0.51	0.0503	0.49	-0.0485	0.553	0.0232	0.739	-0.00771	6.21	-0.106	0.915	1	-0.0768	0.443	0.00461	0.954	-0.0684	0.37	-0.0886	6.21	-1.09	0.278	0.0169	0.805	0.118	0.111
236151_at	84530	SRRM4	-0.2	0.217	0.0301	0.865	-0.281	0.0863	-0.131	0.403	0.0999	0.595	-0.473	0.0087	0.0352	0.834	-0.165	0.329	0.171	0.367	-0.331	0.0406	0.118	7.96	0.701	0.483	0.923	-0.115	0.618	0.257	0.167	-0.332	0.06	0.113	7.96	0.599	0.549	-0.292	0.0643	-0.266	0.119
220980_s_at	83440	ADPGK	-0.0317	0.646	-0.0375	0.621	-0.0479	0.492	-0.119	0.0757	-0.0424	0.597	-0.203	0.00824	0.000302	0.997	-0.0114	0.874	-0.0868	0.282	0.13	0.0583	0.0376	7.77	0.524	0.6	1	-0.0768	0.437	0.0082	0.918	-0.111	0.139	-0.0197	7.77	-0.245	0.806	0.0571	0.397	0.113	0.121
240868_at	100129406	LOC100129406	-0.0139	0.777	-0.0492	0.361	0.0115	0.816	0.00526	0.912	-0.0417	0.465	-0.149	0.00658	0.0922	0.0706	0.0101	0.843	0.0391	0.496	-0.0355	0.468	0.0288	3.55	0.566	0.572	0.935	-0.0512	0.466	0.0338	0.549	0.00737	0.89	-0.000132	3.55	-0.0023	0.998	0.0751	0.117	-0.0791	0.127
236532_at	399947	C11orf87	-0.161	0.392	0.00227	0.991	-0.353	0.0628	-0.336	0.0656	-0.0806	0.712	-0.589	0.00485	-0.0611	0.754	-0.211	0.282	0.299	0.173	-0.253	0.177	0.0268	4.65	0.138	0.891	0.983	0.0737	0.784	-0.0383	0.859	-0.549	0.00744	-0.072	4.65	-0.329	0.742	-0.437	0.0172	-0.3	0.131
235866_at	138241	C9orf85	0.0654	0.242	-0.0241	0.695	0.0706	0.212	0.0864	0.112	-0.00976	0.881	0.166	0.00781	0.000799	0.989	0.0359	0.539	0.0104	0.874	0.0379	0.497	0.0332	6.01	0.571	0.568	0.935	0.03	0.709	-0.000442	0.995	0.0627	0.304	-0.0367	6.01	-0.562	0.574	0.167	0.00234	0.0885	0.135
233914_s_at	81846	SBF2	-0.0269	0.674	0.0477	0.497	-0.156	0.0165	0.112	0.0723	-0.108	0.148	-0.201	0.00487	0.024	0.718	0.0514	0.441	-0.052	0.488	-0.0344	0.59	-0.164	4.79	-2.47	0.0139	0.923	-0.00197	0.983	0.0117	0.874	-0.0488	0.485	-0.0386	4.79	-0.516	0.606	-0.11	0.0782	-0.1	0.139
230666_at	221883	HOXA11-AS	-0.169	0.0743	-0.151	0.147	0.0591	0.537	0.0878	0.339	-0.0965	0.381	0.409	0.00011	-0.296	0.00268	0.0368	0.709	-0.0527	0.634	0.0832	0.378	-0.0732	5.44	-0.744	0.457	0.923	-0.215	0.112	0.0693	0.525	0.238	0.0215	0.121	5.44	1.09	0.275	0.124	0.18	-0.148	0.139
235433_at	139322	APOOL	-0.151	0.308	-0.207	0.204	-0.218	0.146	-0.0339	0.814	-0.00938	0.957	-0.605	0.000265	0.201	0.193	-0.253	0.102	0.189	0.276	-0.097	0.512	-0.208	7.28	-1.35	0.178	0.923	-0.0413	0.846	0.331	0.0532	-0.227	0.161	-0.0236	7.28	-0.136	0.892	-0.344	0.0178	-0.228	0.146
208551_at	8369	HIST1H4G	0.0594	0.401	0.19	0.0145	0.0322	0.653	-0.0324	0.638	0.0763	0.354	0.257	0.00113	-0.0539	0.463	-0.00959	0.897	-0.131	0.114	-0.148	0.0357	0.0872	4.33	1.18	0.237	1	0.0171	0.866	-0.0439	0.59	0.0398	0.606	-0.00557	4.33	-0.0674	0.946	0.127	0.0655	-0.108	0.149
214101_s_at	9520	NPEPPS	-0.0171	0.872	-0.0384	0.742	-0.0969	0.367	0.0102	0.921	0.0273	0.825	-0.362	0.00225	-0.0162	0.883	-0.0325	0.769	0.219	0.0778	0.0831	0.433	0.0665	4.47	0.602	0.547	1	-0.0416	0.784	0.351	0.00419	0.0496	0.669	0.0919	4.47	0.741	0.459	-0.0498	0.631	-0.161	0.152
224370_s_at	84698	CAPS2	-0.0286	0.822	-0.0805	0.565	-0.217	0.0926	-0.0362	0.77	-0.103	0.485	-0.425	0.00282	0.0725	0.584	0.0568	0.669	0.281	0.0594	-0.169	0.184	-0.0938	4.29	-0.708	0.479	0.923	0.101	0.581	0.254	0.0836	-0.25	0.0719	-0.0423	4.29	-0.285	0.776	-0.33	0.0081	-0.192	0.154
201288_at	397	ARHGDIB	-0.0832	0.626	-0.289	0.124	-0.216	0.211	-0.0594	0.72	-0.469	0.0185	-0.512	0.00723	-0.212	0.233	-0.098	0.583	-0.164	0.413	0.0021	0.99	-0.273	6.9	-1.54	0.125	1	-0.169	0.49	-0.332	0.0918	-0.476	0.0109	-0.294	6.9	-1.47	0.141	-0.00637	0.97	0.256	0.156
243569_at	134288	TMEM174	-0.0177	0.819	0.197	0.021	-0.0855	0.277	0.0659	0.383	-0.0636	0.482	0.248	0.00428	-0.164	0.043	-0.0242	0.765	-0.129	0.157	-0.11	0.155	0.118	6	1.46	0.146	0.923	-0.0506	0.65	0.00687	0.939	0.0719	0.397	-0.0302	6	-0.332	0.74	0.0385	0.612	-0.117	0.156
219726_at	54413	NLGN3	0.0453	0.602	0.128	0.18	0.121	0.169	0.143	0.09	0.0691	0.494	0.252	0.00932	0.0345	0.702	0.0876	0.334	-0.0868	0.394	0.0188	0.828	-0.142	7.45	-1.58	0.116	1	-0.00848	0.946	0.0301	0.763	0.059	0.534	0.187	7.45	1.85	0.0654	0.135	0.113	-0.129	0.159
209397_at	4200	ME2	0.178	0.138	-0.231	0.0808	-0.0195	0.873	0.0191	0.87	0.0528	0.705	-0.352	0.0086	-0.0575	0.645	0.0309	0.805	-0.116	0.41	-0.0662	0.58	0.0011	8.14	0.00879	0.993	1	-0.176	0.307	0.147	0.288	-0.271	0.0392	-0.304	8.14	-2.17	0.0305	-0.299	0.0109	-0.178	0.161
225885_at	8411	EEA1	0.293	0.118	-0.238	0.249	-0.17	0.37	-0.00689	0.97	-0.0927	0.671	-0.541	0.00967	0.362	0.0635	0.07	0.72	0.392	0.0743	-0.155	0.408	-0.146	6.35	-0.747	0.455	0.923	0.042	0.876	-0.217	0.314	-0.458	0.0256	-0.494	6.35	-2.26	0.0244	-0.556	0.00248	-0.273	0.169
205825_at	5122	PCSK1	0.147	0.569	0.18	0.526	-0.375	0.152	-0.636	0.0116	-0.0982	0.744	-0.775	0.00729	-0.222	0.41	-0.33	0.222	0.317	0.296	-0.364	0.159	0.00172	6.93	0.00639	0.995	1	-0.414	0.265	-0.471	0.114	0.11	0.697	-0.0818	6.93	-0.271	0.787	-0.774	0.00229	-0.373	0.173
238593_at	79703	C11orf80	0.0467	0.775	-0.0386	0.83	-0.348	0.0361	-0.254	0.111	-0.00857	0.964	-0.581	0.00149	-0.0189	0.912	-0.0138	0.935	0.306	0.111	-0.233	0.154	-0.145	4.59	-0.853	0.394	0.923	-0.18	0.443	-0.024	0.899	-0.0395	0.825	-0.337	4.59	-1.76	0.0788	-0.32	0.0461	-0.236	0.173
227130_s_at	7088	TLE1	-0.0785	0.226	0.0649	0.363	0.0887	0.177	0.0842	0.182	0.0124	0.869	0.229	0.00155	-0.182	0.00694	0.0144	0.832	-0.101	0.183	0.13	0.0448	0.0769	5.49	1.14	0.254	0.923	-0.164	0.0779	0.0622	0.405	0.192	0.007	0.175	5.49	2.32	0.0209	-0.0247	0.697	-0.0914	0.183
202600_s_at	8204	NRIP1	-0.397	0.0957	-0.365	0.163	-0.29	0.229	-0.24	0.3	-0.363	0.191	-0.7	0.00844	-0.168	0.497	-0.239	0.335	0.223	0.424	-0.259	0.275	0.137	5.37	0.552	0.581	1	-0.232	0.496	0.414	0.131	-0.536	0.0395	0.119	5.37	0.429	0.668	-0.524	0.0246	-0.334	0.185
218458_at	64395	GMCL1	0.0748	0.514	-0.195	0.122	-0.122	0.293	0.105	0.348	-0.107	0.424	-0.366	0.00429	-0.0889	0.456	0.0273	0.819	0.0333	0.804	0.0652	0.569	0.0658	5.37	0.551	0.582	1	0.0601	0.715	0.231	0.0801	0.0376	0.764	0.0879	5.37	0.655	0.512	-0.114	0.311	0.159	0.19
219237_s_at	79982	DNAJB14	-0.296	0.0642	-0.251	0.153	-0.178	0.27	-0.273	0.0781	-0.114	0.538	-0.558	0.00175	0.0141	0.932	-0.0746	0.654	0.136	0.467	-0.0804	0.614	-0.0206	5.15	-0.124	0.901	1	0.0773	0.736	0.41	0.0259	-0.3	0.0859	0.133	5.15	0.716	0.474	-0.297	0.0571	-0.218	0.196
223485_at	84264	HAGHL	-0.0815	0.363	0.0766	0.437	0.196	0.031	0.0467	0.592	0.0132	0.899	0.259	0.00966	-0.0284	0.761	0.0856	0.36	0.121	0.25	0.194	0.031	-0.0738	7.2	-0.791	0.429	0.923	-0.0131	0.919	0.134	0.196	-0.0176	0.857	0.184	7.2	1.75	0.0804	0.0882	0.314	-0.121	0.202
235833_at	5471	PPAT	0.0708	0.352	0.0299	0.721	0.166	0.0311	0.0814	0.271	-0.0121	0.892	0.284	0.000849	0.0032	0.968	0.0502	0.528	-0.22	0.0136	0.0673	0.376	0.101	5.27	1.27	0.205	0.923	-0.126	0.249	-0.0968	0.27	0.0843	0.311	0.119	5.27	1.34	0.181	0.0879	0.238	0.102	0.203
235780_at	5567	PRKACB	-0.15	0.183	-0.213	0.085	-0.0893	0.433	0.0446	0.683	-0.0509	0.697	-0.369	0.00334	0.173	0.139	-0.06	0.609	-0.0558	0.672	-0.0811	0.47	-0.103	5.75	-0.876	0.381	0.923	0.0224	0.89	-0.0229	0.86	-0.0673	0.584	-0.138	5.75	-1.05	0.296	-0.226	0.0403	-0.15	0.207
241825_at	129450	TYW5	-0.0136	0.874	0.0523	0.576	0.0395	0.646	0.0594	0.473	-0.023	0.816	-0.252	0.00803	0.172	0.0526	-0.00799	0.928	0.00595	0.952	-0.0541	0.525	-0.0469	6.47	-0.529	0.597	0.942	-0.05	0.682	-0.0728	0.458	0.0678	0.466	-0.0623	6.47	-0.625	0.532	-0.122	0.143	0.113	0.208
218969_at	51025	PAM16	0.118	0.182	0.048	0.623	0.0668	0.457	0.0103	0.905	0.0401	0.697	0.275	0.00545	0.0672	0.466	0.0327	0.723	0.161	0.122	0.125	0.159	-0.0772	7.19	-0.837	0.403	1	0.0779	0.54	-0.126	0.218	0.01	0.917	0.0244	7.19	0.236	0.814	0.104	0.232	-0.117	0.211
230616_at	22973	LAMB2P1	0.0506	0.505	0.0598	0.473	-0.0162	0.832	0.0955	0.196	0.0297	0.737	0.259	0.00227	-0.111	0.161	-0.0339	0.669	-0.0212	0.812	0.00795	0.916	0.0565	6.71	0.715	0.475	0.923	-0.248	0.023	-0.0555	0.525	0.328	8.3e-05	0.081	6.71	0.914	0.361	-0.0368	0.62	0.1	0.211
207231_at	9666	DZIP3	0.0126	0.888	-0.102	0.303	-0.172	0.0577	-0.0774	0.374	-0.0448	0.667	-0.317	0.00154	0.047	0.615	-0.0552	0.555	0.166	0.115	0.011	0.902	-0.0899	5.69	-0.963	0.336	1	-0.336	0.00912	0.156	0.131	-0.157	0.109	-0.0231	5.69	-0.22	0.826	-0.322	0.000263	-0.118	0.214
201817_at	9690	UBE3C	0.0764	0.501	-0.0469	0.707	-0.0471	0.682	-0.222	0.044	0.0228	0.863	-0.369	0.00362	0.12	0.31	-0.0216	0.855	0.255	0.055	0.0501	0.658	0.0301	6.77	0.255	0.799	1	-0.126	0.438	-0.0282	0.829	-0.162	0.19	-0.0677	6.77	-0.51	0.61	-0.304	0.00622	-0.149	0.216
209259_s_at	9126	SMC3	0.117	0.354	-0.168	0.227	0.19	0.138	0.0208	0.865	0.122	0.407	-0.39	0.00568	0.204	0.121	0.0931	0.48	0.306	0.0386	0.225	0.0741	0.0486	5.8	0.37	0.711	1	0.131	0.471	0.183	0.207	-0.117	0.397	-0.0646	5.8	-0.438	0.662	-0.251	0.0419	0.165	0.216
205842_s_at	3717	JAK2	-0.105	0.105	-0.132	0.0646	-0.115	0.08	-0.0326	0.605	-0.155	0.0411	0.231	0.00147	-0.0241	0.721	-0.0844	0.213	0.00318	0.967	-0.105	0.105	0.0901	5.55	1.33	0.183	1	0.0425	0.648	0.22	0.00332	-0.0994	0.162	0.0876	5.55	1.15	0.249	-0.027	0.67	-0.084	0.221
215146_s_at	23331	TTC28	0.146	0.0183	-0.037	0.585	0.0159	0.799	0.0351	0.557	0.109	0.128	-0.193	0.00512	-0.0481	0.452	0.0666	0.3	-0.0739	0.306	0.131	0.0341	0.0336	4.9	0.525	0.6	1	-0.0392	0.657	0.0929	0.191	-0.0539	0.423	-0.0597	4.9	-0.829	0.408	-0.0271	0.653	0.0791	0.225
226889_at	57539	WDR35	-0.1	0.151	-0.0779	0.309	-0.014	0.843	0.0155	0.819	0.0353	0.663	-0.224	0.00394	0.152	0.0359	0.0827	0.256	-0.0901	0.27	0.0591	0.395	-0.157	7.45	-2.16	0.0311	0.923	0.143	0.153	-0.0425	0.596	-0.0739	0.331	-0.107	7.45	-1.32	0.188	-0.123	0.0717	-0.0888	0.228
202611_s_at	9282	MED14	0.0276	0.599	-0.0273	0.637	-0.0281	0.597	0.0679	0.183	0.0442	0.469	-0.164	0.0052	0.0402	0.462	0.0466	0.395	0.0475	0.44	0.00188	0.971	0.0102	4.25	0.187	0.851	1	0.0177	0.814	-0.0207	0.732	-0.108	0.0596	-0.0237	4.25	-0.386	0.7	-0.0948	0.0653	-0.0663	0.233
240380_at	728040	LOC728040	0.0177	0.821	0.0628	0.465	-0.105	0.185	-0.00679	0.929	0.0283	0.755	0.233	0.00764	-0.103	0.204	-0.175	0.0325	-0.17	0.0637	-0.117	0.136	0.169	5.84	2.07	0.0387	0.923	-0.0701	0.532	-0.024	0.79	0.158	0.0651	0.0327	5.84	0.358	0.72	-0.0493	0.519	0.0965	0.244
230097_at	2618	GART	-0.141	0.226	-0.138	0.281	-0.156	0.186	0.0589	0.602	-0.068	0.615	-0.427	0.001	0.193	0.11	-0.15	0.218	0.0752	0.581	-0.03	0.796	-0.132	5.66	-1.09	0.276	0.923	-0.0147	0.93	0.0969	0.469	-0.235	0.0644	-0.0417	5.66	-0.307	0.759	-0.239	0.0361	-0.143	0.244
215522_at	22986	SORCS3	0.0691	0.406	-0.0358	0.695	-0.189	0.0251	-0.0681	0.4	-0.0729	0.451	-0.242	0.00907	-0.141	0.103	0.0247	0.776	-0.0327	0.737	0.073	0.38	-0.0598	5.75	-0.691	0.49	1	-0.176	0.14	-0.000392	0.997	-0.0897	0.324	-0.013	5.75	-0.133	0.894	-0.121	0.136	-0.102	0.248
226294_x_at	157769	FAM91A1	0.0592	0.694	-0.254	0.126	-0.152	0.318	0.0792	0.589	-0.0262	0.882	-0.444	0.0083	0.442	0.00497	-0.0916	0.561	0.169	0.339	-0.144	0.339	0.0542	6.54	0.345	0.73	0.962	0.0237	0.913	-0.0955	0.582	-0.398	0.016	-0.352	6.54	-2	0.0461	-0.364	0.0136	0.182	0.254
225007_at	10146	G3BP1	-0.0024	0.977	-0.0299	0.746	-0.0197	0.816	0.0895	0.273	-0.0335	0.732	-0.256	0.00633	0.138	0.115	0.0828	0.345	0.012	0.903	0.067	0.424	-0.0602	8.07	-0.689	0.491	0.923	0.0762	0.527	-0.0664	0.493	-0.0745	0.417	-0.156	8.07	-1.59	0.112	-0.13	0.115	0.101	0.255
232443_at	441052	LOC441052	-0.111	0.214	0.0637	0.515	0.0595	0.509	0.0509	0.556	0.0204	0.844	0.307	0.00202	-0.203	0.0283	0.000412	0.996	-0.203	0.0523	-0.24	0.00706	0.147	5.91	1.59	0.113	0.923	0.0482	0.706	-0.0293	0.775	0.00138	0.989	-0.0361	5.91	-0.347	0.729	-0.0697	0.424	0.106	0.263
204049_s_at	9749	PHACTR2	-0.0513	0.785	-0.424	0.0405	-0.18	0.345	0.123	0.499	-0.0159	0.942	-0.706	0.000786	0.00539	0.978	-0.203	0.301	0.215	0.328	0.0168	0.929	0.136	5.98	0.696	0.486	1	0.0837	0.756	0.749	0.000571	-0.424	0.0395	0.0531	5.98	0.242	0.809	-0.134	0.466	0.22	0.27
224436_s_at	25934	NIPSNAP3A	-0.00256	0.991	-0.303	0.206	-0.0777	0.724	0.0271	0.898	-0.17	0.502	-0.63	0.00952	0.154	0.497	-0.141	0.533	0.169	0.506	-0.304	0.162	-0.183	5.26	-0.808	0.419	0.923	-0.00481	0.988	-0.0496	0.843	-0.598	0.012	-0.721	5.26	-2.84	0.00468	-0.598	0.00506	-0.254	0.27
214954_at	26032	SUSD5	0.0288	0.707	0.027	0.749	-0.0475	0.541	-0.11	0.141	-0.00538	0.952	-0.253	0.0032	-0.0402	0.615	0.0134	0.867	0.0261	0.772	-0.0492	0.521	-0.0293	4.39	-0.366	0.714	1	0.0993	0.367	-0.168	0.0578	0.00437	0.958	0.00722	4.39	0.0805	0.936	-0.258	0.000623	0.0891	0.273
242363_at	1781	DYNC1I2	-0.195	0.0674	-0.197	0.0922	0.0563	0.602	-0.0298	0.774	-0.16	0.197	-0.321	0.00698	0.114	0.303	-0.23	0.0385	-0.146	0.241	-0.121	0.256	-0.342	6.96	-3.08	0.00212	0.923	-0.248	0.104	-0.203	0.0981	-0.374	0.00135	-0.274	6.96	-2.2	0.0278	-0.244	0.0192	-0.123	0.275
238346_s_at	96764	TGS1	0.0313	0.718	-0.201	0.0358	-0.00222	0.98	-0.0318	0.706	-0.0401	0.692	0.258	0.00788	-0.0682	0.45	-0.126	0.166	-0.0157	0.877	-0.102	0.242	0.0726	4.04	0.803	0.422	0.923	0.0111	0.929	0.115	0.249	-0.0519	0.585	0.0292	4.04	0.287	0.774	-0.0605	0.476	0.0982	0.286
227987_at	23230	VPS13A	-0.0927	0.528	0.0484	0.765	-0.228	0.126	-0.158	0.271	-0.0785	0.646	-0.554	0.000754	0.102	0.506	-0.151	0.326	0.102	0.553	-0.22	0.134	0.00331	4.65	0.0216	0.983	0.997	0.119	0.572	0.175	0.301	-0.376	0.0195	-0.0801	4.65	-0.466	0.641	-0.338	0.019	-0.165	0.29
242153_at	55132	LARP1B	0.0598	0.401	0.0397	0.612	-0.00546	0.94	-0.0122	0.86	0.0357	0.667	-0.249	0.00173	0.204	0.00611	0.0442	0.552	0.0607	0.467	-0.00258	0.971	0.0291	4.08	0.392	0.695	0.956	0.0816	0.425	-0.0501	0.542	-0.137	0.0789	0.0145	4.08	0.174	0.862	-0.0961	0.168	0.0781	0.3
205773_at	22849	CPEB3	0.0991	0.277	-0.114	0.257	-0.0232	0.802	-0.0237	0.789	-0.0107	0.92	-0.28	0.00588	-0.0106	0.911	0.085	0.372	0.112	0.294	-0.0725	0.426	0.1	4.76	1.06	0.291	1	0.163	0.213	0.0706	0.502	0.0744	0.455	-0.0388	4.76	-0.365	0.716	-0.148	0.0981	0.0979	0.31
221920_s_at	51312	SLC25A37	-0.178	0.135	-0.128	0.327	-0.148	0.219	-0.148	0.202	-0.0801	0.563	-0.409	0.00211	-0.115	0.353	-0.182	0.143	0.0296	0.832	-0.184	0.122	-0.361	5.15	-2.91	0.00375	1	-0.236	0.168	-0.0299	0.827	-0.0995	0.445	-0.256	5.15	-1.84	0.0665	-0.282	0.0157	-0.128	0.311
205002_at	27245	AHDC1	0.142	0.243	0.285	0.0337	0.0861	0.485	-0.0226	0.849	0.204	0.151	0.393	0.00387	0.0299	0.814	0.0408	0.748	0.281	0.0496	-0.236	0.0526	-0.0129	6.1	-0.102	0.919	1	0.064	0.714	0.156	0.267	0.096	0.471	0.154	6.1	1.08	0.279	-0.0161	0.892	-0.13	0.313
219312_s_at	65986	ZBTB10	-0.00435	0.906	-0.0299	0.46	-0.0569	0.126	0.0286	0.423	-0.00865	0.84	-0.127	0.00195	-0.0299	0.434	-0.0117	0.76	-0.0602	0.162	0.0564	0.124	0.00785	3.98	0.205	0.837	1	0.0471	0.372	0.0339	0.423	0.0117	0.77	-0.0435	3.98	-1.01	0.312	-0.019	0.597	0.0391	0.314
240452_at	2935	GSPT1	0.00311	0.986	0.00571	0.976	-0.0782	0.658	-0.0453	0.789	-0.163	0.423	-0.615	0.00163	0.24	0.186	-0.373	0.0412	0.179	0.381	-0.299	0.0865	-0.178	5.46	-0.98	0.327	0.923	-0.297	0.237	0.0753	0.708	-0.271	0.156	-0.29	5.46	-1.42	0.157	-0.477	0.00535	-0.184	0.32
205759_s_at	6820	SULT2B1	-0.1	0.182	0.146	0.0779	-0.0209	0.783	-0.0128	0.861	-0.0657	0.452	0.218	0.00917	-0.128	0.1	-0.0281	0.72	-0.0604	0.492	-0.0483	0.519	-0.0251	4.98	-0.322	0.748	1	0.218	0.0428	-0.132	0.127	0.0729	0.375	0.0867	4.98	0.988	0.324	0.157	0.0325	-0.0785	0.323
232103_at	10380	BPNT1	0.0869	0.322	-0.0916	0.342	0.0768	0.387	0.16	0.0609	0.0522	0.609	-0.324	0.000956	0.101	0.267	0.0161	0.86	-0.0431	0.675	0.0816	0.352	0.0248	5.95	0.272	0.786	0.972	0.0931	0.459	-0.0559	0.58	-0.0843	0.379	-0.0525	5.95	-0.512	0.609	-0.0842	0.326	0.0896	0.334
203306_s_at	10559	SLC35A1	0.145	0.371	-0.141	0.43	-0.108	0.508	-0.256	0.104	0.118	0.53	-0.509	0.00482	-0.0775	0.645	0.138	0.415	0.208	0.272	-0.194	0.231	-0.107	6.72	-0.635	0.526	1	-0.123	0.596	-0.123	0.51	-0.27	0.127	-0.304	6.72	-1.61	0.109	-0.558	0.000444	-0.162	0.344
222630_at	64864	RFX7	0.192	0.124	-0.132	0.337	0.0656	0.604	0.0479	0.694	0.1	0.491	-0.393	0.00494	0.211	0.105	0.0445	0.733	0.181	0.216	0.0475	0.703	-0.0651	6.47	-0.5	0.617	0.945	0.0581	0.746	0.0152	0.916	-0.207	0.13	-0.272	6.47	-1.86	0.0628	-0.275	0.025	0.125	0.346
230425_at	2047	EPHB1	0.251	0.0665	0.224	0.136	0.0348	0.801	-0.0342	0.796	0.262	0.0998	-0.406	0.0077	0.18	0.205	0.115	0.418	0.19	0.235	0.073	0.592	-0.292	6.41	-2.05	0.0403	0.923	-0.0111	0.955	-0.192	0.223	0.0769	0.606	-0.275	6.41	-1.72	0.085	-0.0979	0.464	0.135	0.351
235962_at	64343	AZI2	-0.0265	0.683	0.0616	0.388	-0.0143	0.828	0.0873	0.167	0.0158	0.835	-0.203	0.0051	0.00846	0.9	0.115	0.0911	0.0557	0.465	-0.0492	0.448	-0.0918	3.89	-1.36	0.175	0.923	0.0431	0.643	-0.0558	0.456	-0.00529	0.941	-0.0626	3.89	-0.824	0.41	-0.143	0.025	0.0638	0.354
214678_x_at	7543	ZFX	0.0525	0.157	-0.023	0.573	-0.0276	0.463	-0.0332	0.358	-0.021	0.627	-0.111	0.00716	-0.00875	0.821	0.00821	0.832	0.0371	0.393	0.0961	0.00968	-0.0569	3.88	-1.47	0.141	1	0.111	0.0373	0.0516	0.228	0.0477	0.24	-0.0462	3.88	-1.06	0.287	-0.0344	0.344	0.036	0.359
228032_s_at	163486	DENND1B	0.0726	0.323	0.128	0.114	0.0109	0.883	0.00876	0.902	0.00486	0.955	-0.213	0.00937	-0.00349	0.964	0.0481	0.53	0.102	0.237	0.0256	0.727	0.00741	4.48	0.0969	0.923	0.986	0.0899	0.394	-0.118	0.163	-0.0698	0.384	-0.0491	4.48	-0.572	0.567	-0.0747	0.298	0.0708	0.362
230270_at	55119	PRPF38B	-0.186	0.209	-0.146	0.369	-0.0253	0.866	-0.0363	0.801	-0.203	0.24	-0.429	0.00961	0.212	0.17	-0.028	0.857	0.226	0.194	-0.151	0.309	-0.11	3.94	-0.715	0.475	0.923	0.00669	0.975	0.344	0.0443	-0.179	0.27	-0.0666	3.94	-0.385	0.701	-0.346	0.0171	-0.143	0.362
222708_s_at	55014	STX17	-0.245	0.0484	-0.225	0.0989	-0.0837	0.505	0.131	0.279	-0.102	0.478	-0.447	0.00126	0.225	0.0811	0.0082	0.949	0.274	0.0593	-0.153	0.218	-0.103	6.94	-0.795	0.427	0.923	-0.117	0.509	0.316	0.0273	-0.236	0.0823	-0.0853	6.94	-0.588	0.557	-0.164	0.178	-0.12	0.362
243261_at	154822	LINC00689	0.0563	0.453	0.0808	0.327	-0.0305	0.687	-0.0413	0.571	-0.0501	0.566	0.217	0.00957	-0.0856	0.272	0.0531	0.497	-0.2	0.0227	-0.192	0.0104	0.036	6.52	0.462	0.644	0.951	-0.00183	0.986	-0.144	0.0955	0.0618	0.45	0.0828	6.52	0.946	0.345	0.0427	0.56	0.0708	0.372
215718_s_at	23469	PHF3	0.0301	0.39	0.00533	0.89	0.0838	0.0183	0.0196	0.566	0.0365	0.371	0.104	0.0077	0.0692	0.058	-0.00041	0.991	0.0385	0.348	0.057	0.104	-0.0145	3.79	-0.398	0.691	1	0.00468	0.926	0.00939	0.816	0.0273	0.475	-0.0187	3.79	-0.457	0.648	0.02	0.56	0.0331	0.372
220945_x_at	54682	MANSC1	0.129	0.25	-0.123	0.32	-0.0212	0.851	-0.00833	0.939	-0.014	0.915	-0.404	0.00126	-0.132	0.257	-0.0443	0.705	-0.0141	0.915	-0.0694	0.535	0.03	4.78	0.257	0.797	1	-0.061	0.704	-0.128	0.323	-0.0702	0.566	-0.0232	4.78	-0.177	0.859	-0.125	0.253	0.105	0.374
230115_at	374387	DKFZp779M0652	-0.107	0.15	-0.192	0.0196	-0.0133	0.86	0.0258	0.721	-0.00253	0.977	0.221	0.00783	0.0329	0.671	0.0825	0.289	-0.0498	0.569	-0.0411	0.58	-0.0166	6.6	-0.214	0.83	0.977	0.0284	0.791	-0.0662	0.441	0.034	0.676	0.197	6.6	2.27	0.0237	0.158	0.0302	-0.0698	0.376
223405_at	80896	NPL	-0.0904	0.379	0.0204	0.856	-0.212	0.042	-0.004	0.968	-0.109	0.361	-0.331	0.00387	0.181	0.0907	-0.0942	0.38	-0.109	0.367	-0.173	0.0925	-0.0251	7.21	-0.235	0.814	0.977	-0.037	0.802	-0.127	0.284	-0.15	0.18	-0.371	7.21	-3.09	0.00208	-0.204	0.0424	-0.0957	0.378
201936_s_at	8672	EIF4G3	0.071	0.323	-0.0879	0.266	0.0051	0.944	-0.0812	0.245	0.00856	0.918	-0.229	0.00433	-0.105	0.16	-0.00287	0.969	0.0346	0.681	-0.0961	0.18	-0.0602	7.31	-0.806	0.421	1	-0.0144	0.888	-0.108	0.193	-0.113	0.152	-0.0944	7.31	-1.12	0.261	-0.215	0.00226	0.0667	0.38
235580_at	7700	ZNF141	0.111	0.131	-0.0668	0.408	0.0478	0.52	0.0517	0.469	0.103	0.226	0.221	0.00714	-0.0449	0.557	-0.067	0.382	-0.0625	0.467	-0.0931	0.205	0.0728	5.39	0.952	0.341	0.923	-0.0303	0.774	-0.183	0.0304	0.0769	0.338	-0.0592	5.39	-0.69	0.49	-0.0862	0.23	0.0675	0.385
243650_at	130271	PLEKHH2	0.117	0.0817	0.0695	0.347	0.122	0.0728	0.0358	0.583	-0.114	0.146	0.251	0.000851	-0.0956	0.172	0.0719	0.305	-0.124	0.114	-0.0347	0.605	0.0418	4.39	0.597	0.551	0.934	-0.00976	0.919	-0.0516	0.505	0.122	0.0971	0.115	4.39	1.46	0.144	0.0581	0.377	0.0616	0.387
202599_s_at	8204	NRIP1	0.166	0.381	-0.239	0.253	0.0289	0.88	-0.286	0.121	-0.0715	0.746	-0.6	0.00467	-0.0696	0.724	0.0853	0.667	0.376	0.0915	0.0592	0.755	-0.0883	7.06	-0.447	0.655	1	-0.0677	0.804	-0.233	0.288	-0.312	0.133	-0.216	7.06	-0.972	0.331	-0.488	0.00872	-0.174	0.387
204237_at	51454	GULP1	0.229	0.0435	0.0298	0.811	-0.0792	0.489	0.0087	0.937	0.003	0.982	-0.384	0.00237	-0.0435	0.711	0.0102	0.931	0.044	0.74	0.0167	0.883	0.0345	4.2	0.293	0.769	1	0.00809	0.96	-0.231	0.0764	-0.104	0.401	-0.00895	4.2	-0.0677	0.946	-0.185	0.0948	-0.103	0.388
235518_at	6546	SLC8A1	0.14	0.318	-0.198	0.198	-0.217	0.126	-0.218	0.11	-0.195	0.232	-0.404	0.00984	0.0336	0.817	-0.132	0.369	0.164	0.316	-0.196	0.161	-0.0924	5.52	-0.634	0.527	0.933	-0.102	0.612	-0.268	0.0971	-0.428	0.00531	-0.154	5.52	-0.941	0.347	-0.231	0.0917	-0.128	0.389
239548_at	257194	NEGR1	0.0121	0.855	0.0462	0.525	-0.0408	0.543	-0.0596	0.354	0.0301	0.696	-0.202	0.00623	-0.00801	0.907	0.0526	0.446	0.0173	0.823	-0.0385	0.561	-0.0107	3.68	-0.156	0.876	0.982	0.0305	0.748	-0.0623	0.414	-0.0319	0.66	-0.0931	3.68	-1.2	0.229	-0.128	0.0481	-0.06	0.391
216411_s_at	2585	GALK2	-0.012	0.853	-0.112	0.117	-0.0454	0.489	-0.0138	0.826	-0.103	0.173	-0.228	0.00165	-0.0669	0.32	-0.015	0.824	0.0614	0.418	0.0411	0.525	-0.0603	4.46	-0.895	0.371	1	-0.0945	0.309	0.0928	0.214	-0.0392	0.579	0.119	4.46	1.58	0.115	-0.0159	0.802	0.0576	0.401
239162_at	100506897	DAPK1-IT1	-0.179	0.109	0.0295	0.81	-0.165	0.145	-0.0377	0.728	-0.0317	0.807	-0.464	0.000196	0.0907	0.434	-0.235	0.0436	0.0704	0.59	-0.113	0.312	-0.0358	5.18	-0.309	0.757	0.962	-0.0551	0.73	0.206	0.11	-0.117	0.335	0.0696	5.18	0.534	0.593	-0.142	0.194	-0.0965	0.413
218252_at	26586	CKAP2	0.075	0.285	0.00851	0.912	-0.0195	0.784	0.0455	0.505	-0.0342	0.675	-0.202	0.00999	-0.0252	0.73	0.0806	0.271	-0.0833	0.311	0.0517	0.461	-0.00225	5.26	-0.0308	0.975	1	-0.0894	0.374	0.0617	0.445	0.0226	0.768	-0.147	5.26	-1.79	0.0735	-0.181	0.00838	0.0603	0.416
243318_at	50717	DCAF8	-0.0488	0.606	-0.0435	0.675	-0.0403	0.673	0.115	0.21	0.0186	0.866	-0.3	0.00444	0.132	0.179	-0.0676	0.493	0.147	0.186	0.0411	0.663	-0.012	8.05	-0.122	0.903	0.985	-0.0929	0.493	0.153	0.16	0.0292	0.778	0.0252	8.05	0.229	0.819	-0.149	0.106	0.0804	0.421
229705_at	5289	PIK3C3	0.147	0.322	0.0879	0.591	-0.191	0.206	-0.195	0.178	0.0405	0.815	-0.448	0.00695	0.147	0.343	-0.145	0.351	0.168	0.334	-0.0852	0.566	-0.0554	5.78	-0.358	0.72	0.961	0.174	0.415	-0.33	0.0541	-0.289	0.0754	-0.276	5.78	-1.59	0.112	-0.363	0.0127	-0.126	0.424
207996_s_at	753	LDLRAD4	0.22	0.0962	-0.106	0.465	0.0218	0.87	-0.0949	0.459	-0.0653	0.67	-0.4	0.00665	-0.0104	0.94	-0.0244	0.859	0.284	0.0658	0.0954	0.469	-0.0693	5.24	-0.505	0.614	1	0.0196	0.918	-0.115	0.449	-0.0843	0.558	-0.0424	5.24	-0.275	0.784	-0.34	0.00844	0.111	0.427
214785_at	23230	VPS13A	0.0293	0.787	-0.0365	0.759	-0.179	0.103	-0.0999	0.343	-0.066	0.601	-0.49	5.48e-05	-0.0423	0.707	-0.0724	0.522	0.151	0.233	-0.137	0.207	0.0239	5.36	0.212	0.832	1	-0.101	0.517	0.178	0.154	-0.056	0.636	0.066	5.36	0.521	0.602	-0.298	0.00497	-0.0911	0.427
219001_s_at	79269	DCAF10	0.0355	0.581	-0.0652	0.357	-0.104	0.11	0.0277	0.658	-0.0468	0.533	-0.187	0.00912	0.00602	0.928	-0.0386	0.566	-0.0725	0.336	-0.0759	0.238	-0.0227	5.45	-0.339	0.735	1	-0.0188	0.838	0.104	0.161	-0.00344	0.961	0.0622	5.45	0.827	0.409	-0.0223	0.723	0.0539	0.429
213025_at	55623	THUMPD1	0.143	0.195	-0.196	0.106	0.081	0.469	-0.0439	0.683	0.0675	0.6	-0.321	0.00928	-0.0105	0.927	0.12	0.3	0.0965	0.456	0.12	0.278	0.0458	5.36	0.398	0.69	1	0.00464	0.977	0.0318	0.802	-0.144	0.233	-0.0543	5.36	-0.421	0.674	-0.21	0.0527	0.0921	0.43
229412_at	129685	TAF8	-0.0441	0.469	0.0436	0.515	0.0126	0.838	0.0142	0.81	0.0311	0.661	0.2	0.0033	-0.0971	0.126	0.0843	0.185	0.00333	0.963	-0.0688	0.258	0.062	4.9	0.978	0.328	0.923	-0.00527	0.952	-0.0563	0.423	0.12	0.0709	0.0777	4.9	1.09	0.275	-0.0803	0.178	-0.0507	0.432
229288_at	2045	EPHA7	0.0783	0.517	0.00228	0.986	0.0299	0.807	0.13	0.267	0.265	0.0594	-0.348	0.00982	0.189	0.132	-0.0143	0.91	0.0917	0.517	0.117	0.332	0.0496	6.57	0.394	0.694	0.956	0.0321	0.853	-0.0566	0.684	0.0488	0.712	-0.0556	6.57	-0.394	0.694	-0.149	0.208	0.0999	0.434
225760_at	114803	MYSM1	0.0537	0.755	-0.0511	0.788	-0.256	0.143	-0.278	0.0971	-0.178	0.375	-0.538	0.00516	0.212	0.237	0.00203	0.991	0.196	0.331	-0.27	0.116	-0.135	5.7	-0.753	0.452	0.923	0.0808	0.744	-0.218	0.272	-0.333	0.0774	-0.404	5.7	-2.01	0.0453	-0.751	9.74e-06	-0.141	0.439
217754_at	54606	DDX56	0.0584	0.442	0.115	0.168	-0.00706	0.927	-0.0612	0.407	0.109	0.217	0.249	0.00331	0.0671	0.396	0.0766	0.334	-0.0625	0.482	0.0772	0.309	0.00522	7.08	0.0661	0.947	1	0.189	0.0833	-0.0514	0.557	0.0154	0.853	0.123	7.08	1.38	0.168	0.0541	0.466	-0.0619	0.441
228191_at	28982	FLVCR1	0.22	0.0358	0.0785	0.496	0.0556	0.601	-0.0211	0.836	0.089	0.466	-0.312	0.00777	0.138	0.206	-0.0938	0.392	0.152	0.216	-0.0708	0.499	-0.0152	7	-0.14	0.889	0.982	0.0801	0.594	-0.251	0.0383	-0.04	0.727	-0.248	7	-2.03	0.0432	-0.163	0.113	0.0836	0.451
203174_s_at	10139	ARFRP1	-0.071	0.365	0.09	0.297	0.00782	0.922	0.0254	0.739	-0.0763	0.403	0.238	0.00652	0.0329	0.686	0.0288	0.725	-0.0861	0.349	-0.0514	0.511	-0.0715	8.13	-0.877	0.381	1	0.0538	0.632	-0.117	0.196	0.0925	0.28	0.0306	8.13	0.334	0.738	0.17	0.0266	-0.0622	0.453
224324_at	83876	MRO	-0.121	0.167	-0.0959	0.32	-0.0578	0.514	-0.181	0.0333	0.071	0.486	0.258	0.00841	-0.0424	0.641	0.0882	0.335	-0.0494	0.63	-0.0417	0.633	-0.129	5.93	-1.42	0.157	0.923	0.117	0.353	0.089	0.378	-0.0341	0.721	0.0438	5.93	0.428	0.669	0.041	0.632	-0.0694	0.454
217540_at	91775	NXPE3	-0.00412	0.937	-0.0353	0.538	-0.0495	0.347	-0.0459	0.364	-0.0311	0.607	-0.195	0.000817	0.0169	0.754	-0.0163	0.764	0.0365	0.549	0.0424	0.415	-0.0341	4.1	-0.63	0.529	1	0.0351	0.638	0.0911	0.129	-0.0526	0.355	0.0271	4.1	0.446	0.656	-0.0905	0.0754	-0.0411	0.455
202422_s_at	2182	ACSL4	0.00547	0.958	-0.118	0.306	-0.158	0.135	-0.0885	0.383	-0.117	0.338	-0.361	0.002	-0.0155	0.886	-0.00971	0.929	0.109	0.372	0.044	0.673	0.0725	4.43	0.667	0.505	1	0.133	0.375	-0.104	0.39	-0.116	0.309	-0.111	4.43	-0.913	0.362	-0.242	0.018	-0.0816	0.46
231188_at	54993	ZSCAN2	0.0323	0.645	0.0343	0.657	0.0402	0.571	0.109	0.111	-0.0054	0.947	0.204	0.00914	-0.136	0.0629	0.0128	0.862	0.0701	0.394	0.136	0.0528	0.0104	5.57	0.143	0.887	0.982	-0.0353	0.726	-0.0623	0.442	0.276	0.00035	0.00686	5.57	0.0835	0.933	0.0478	0.487	-0.0531	0.475
241709_s_at	1793	DOCK1	-0.231	0.0254	0.0605	0.594	0.0983	0.347	-0.0504	0.615	0.111	0.356	0.31	0.00709	0.197	0.0664	0.0213	0.844	-0.113	0.351	-0.132	0.202	-0.145	4.84	-1.35	0.178	0.923	0.037	0.803	0.0788	0.507	-0.0015	0.989	0.035	4.84	0.29	0.772	0.117	0.248	-0.0776	0.477
243759_at	57466	SCAF4	-0.129	0.187	0.0951	0.377	-0.0785	0.428	0.0134	0.888	-0.0898	0.431	-0.312	0.00439	0.0979	0.337	-0.0293	0.775	0.0685	0.551	-0.0879	0.369	0.13	5.07	1.27	0.204	0.923	0.0526	0.708	0.232	0.0403	-0.119	0.265	-0.0442	5.07	-0.386	0.7	-0.0839	0.381	-0.0733	0.479
218311_at	8491	MAP4K3	0.385	0.0137	-0.122	0.478	0.0278	0.86	-0.192	0.205	-0.0113	0.95	-0.552	0.00153	0.0416	0.798	0.0954	0.558	0.0966	0.597	-0.00127	0.993	0.0217	4.78	0.133	0.894	1	0.0469	0.834	0.0382	0.832	-0.0445	0.794	-0.25	4.78	-1.37	0.17	-0.421	0.00593	-0.116	0.482
212623_at	440026	TMEM41B	-0.0215	0.865	-0.235	0.0891	-0.154	0.228	-0.148	0.226	-0.0239	0.87	-0.436	0.00195	0.0538	0.681	0.00777	0.953	0.199	0.176	0.0625	0.619	-0.0784	7.28	-0.599	0.549	1	-0.158	0.381	0.325	0.025	-0.278	0.0433	-0.16	7.28	-1.09	0.276	-0.34	0.00591	-0.0933	0.483
226060_at	91869	RFT1	-0.00629	0.928	0.0586	0.447	0.0774	0.275	0.131	0.0549	-0.0429	0.599	0.212	0.0068	-0.0518	0.476	0.00577	0.937	0.0206	0.801	0.0782	0.264	-0.162	6.44	-2.22	0.0268	0.923	-0.106	0.291	-0.0573	0.477	0.0059	0.939	-0.0193	6.44	-0.236	0.814	-0.0983	0.151	0.0517	0.485
235296_at	56648	EIF5A2	-0.0113	0.948	0.142	0.451	-0.197	0.258	-0.106	0.524	-0.055	0.783	-0.523	0.00639	0.185	0.3	-0.15	0.403	0.347	0.0846	-0.246	0.151	0.00164	5.81	0.00915	0.993	0.998	-0.229	0.353	-0.458	0.021	-0.228	0.224	-0.163	5.81	-0.814	0.416	-0.478	0.00455	-0.125	0.49
223709_s_at	80326	WNT10A	-0.0542	0.405	-0.0133	0.853	-0.0563	0.393	-0.0917	0.148	-0.0603	0.426	0.189	0.00924	-0.137	0.0426	-0.0046	0.946	-0.118	0.121	0.0358	0.582	0.067	5.33	0.989	0.323	0.923	-0.0246	0.793	-0.0328	0.661	-0.042	0.555	0.111	5.33	1.46	0.144	0.056	0.38	-0.0475	0.491
213282_at	139322	APOOL	0.127	0.1	-0.132	0.121	-0.0492	0.529	-0.0565	0.451	-0.0536	0.551	-0.235	0.00649	-0.0565	0.481	0.00273	0.973	0.115	0.204	-0.103	0.182	-0.0903	6.57	-1.12	0.261	1	-0.0479	0.665	-0.0748	0.4	-0.0847	0.316	-0.051	6.57	-0.566	0.572	-0.198	0.00887	-0.056	0.493
242543_at	284948	SH2D6	0.0202	0.818	0.121	0.209	0.0379	0.669	0.0648	0.447	0.0306	0.764	0.386	8.35e-05	-0.133	0.146	0.0556	0.543	-0.171	0.0967	0.0573	0.513	0.104	6.21	1.14	0.253	0.923	-0.114	0.365	0.0364	0.719	0.184	0.0547	0.217	6.21	2.12	0.0342	0.0521	0.543	0.0629	0.498
218871_x_at	55454	CSGALNACT2	0.0302	0.781	-0.284	0.0177	0.0706	0.521	0.0342	0.746	0.112	0.377	-0.437	0.000326	0.00318	0.978	0.0187	0.869	0.156	0.22	0.151	0.164	0.0855	4.55	0.757	0.449	1	-0.0776	0.618	0.0762	0.542	0.00777	0.948	-0.112	4.55	-0.881	0.379	-0.24	0.0244	0.0779	0.498
201824_at	9604	RNF14	0.105	0.521	-0.239	0.185	-0.0487	0.769	-0.0862	0.588	0.0509	0.789	-0.539	0.00321	-0.0306	0.857	0.0663	0.698	0.232	0.228	-0.0315	0.847	-0.0888	6.2	-0.521	0.602	1	-0.0808	0.731	-0.00335	0.986	-0.259	0.148	-0.216	6.2	-1.13	0.258	-0.545	0.000699	-0.117	0.499
218687_s_at	56667	MUC13	-0.104	0.201	0.128	0.151	0.055	0.504	0.0654	0.408	-0.0207	0.827	0.278	0.00222	-0.0262	0.757	0.0227	0.789	-0.0948	0.32	0.154	0.0583	0.00441	5.44	0.0522	0.958	1	-0.0259	0.824	0.0113	0.904	0.0678	0.445	0.0426	5.44	0.448	0.654	0.288	0.000308	0.0578	0.502
241938_at	9444	QKI	-0.511	0.021	-0.33	0.175	0.104	0.641	0.000411	0.998	-0.367	0.154	-0.643	0.00923	0.454	0.0485	-0.223	0.333	0.119	0.645	0.0691	0.754	-0.65	8.13	-2.82	0.00489	0.923	-0.301	0.343	0.0369	0.885	-0.217	0.369	-0.41	8.13	-1.58	0.113	-0.591	0.0064	-0.157	0.502
225160_x_at	4193	MDM2	0.0405	0.65	-0.179	0.0682	0.0979	0.279	-0.00598	0.945	-0.151	0.147	-0.277	0.00553	0.165	0.0764	-0.0752	0.42	0.136	0.194	0.0685	0.443	-0.0287	6.3	-0.309	0.758	0.962	-0.00326	0.98	-0.0382	0.71	-0.202	0.0391	-0.294	6.3	-2.81	0.00509	-0.194	0.027	0.0627	0.507
232312_at	55291	PPP6R3	0.0226	0.861	0.0232	0.87	-0.207	0.112	-0.0932	0.455	-0.0221	0.882	-0.399	0.00541	-0.0313	0.815	-0.363	0.00699	0.197	0.192	-0.201	0.118	0.052	5.7	0.389	0.698	0.956	-0.275	0.137	0.423	0.00436	-0.0237	0.866	0.00256	5.7	0.0171	0.986	-0.291	0.0209	-0.09	0.508
225397_at	90416	C15orf57	-0.0212	0.766	0.0777	0.321	-0.0145	0.84	0.0813	0.24	-0.0655	0.429	-0.269	0.000735	-0.00489	0.947	0.0821	0.269	-0.0933	0.264	0.113	0.114	-0.135	6.92	-1.82	0.0687	0.923	-0.179	0.0796	-0.0707	0.389	-0.0214	0.783	0.0184	6.92	0.222	0.825	-0.148	0.0339	-0.0496	0.51
63009_at	55164	SHQ1	0.0138	0.773	0.0426	0.416	-0.0511	0.29	0.0261	0.574	0.0512	0.357	0.145	0.00658	-0.0404	0.415	0.000941	0.985	-0.0408	0.465	-0.0718	0.132	0.0504	5.01	1.02	0.31	1	-0.044	0.52	0.0611	0.266	0.0551	0.29	0.0317	5.01	0.568	0.57	0.024	0.606	-0.0328	0.516
223441_at	26503	SLC17A5	0.0035	0.973	0.0931	0.412	-0.106	0.31	-0.0956	0.341	0.0753	0.531	-0.325	0.00484	0.217	0.0435	4.59e-05	1	0.274	0.0237	0.027	0.793	0.00891	6.34	0.0829	0.934	0.986	0.0831	0.575	-0.139	0.244	-0.0373	0.741	-0.211	6.34	-1.75	0.0808	-0.238	0.0185	0.0707	0.517
217566_s_at	7047	TGM4	0.0626	0.186	0.00228	0.965	0.0566	0.238	0.0743	0.107	0.0322	0.559	0.167	0.00162	0.0202	0.682	0.0913	0.0648	-0.0165	0.767	0.0114	0.81	0.0425	4.41	0.863	0.388	1	0.0212	0.755	-0.00333	0.951	0.0453	0.382	-0.0334	4.41	-0.604	0.546	0.137	0.00319	0.0322	0.52
244008_at	79668	PARP8	0.126	0.287	0.0368	0.778	-0.053	0.659	-0.0267	0.817	-0.0268	0.846	-0.441	0.000897	-0.0897	0.467	-0.0665	0.592	0.0458	0.742	-0.199	0.0931	-0.00337	6.04	-0.0273	0.978	0.996	0.165	0.332	-0.237	0.0837	-0.289	0.0259	-0.421	6.04	-3.04	0.0025	-0.26	0.0255	0.0807	0.52
235528_at	2979	GUCA1B	-0.0368	0.592	0.0319	0.673	0.117	0.0919	0.0811	0.224	0.0383	0.631	0.223	0.00372	0.0179	0.802	0.146	0.0414	-0.0904	0.261	0.034	0.62	-0.0469	6.49	-0.656	0.512	0.93	-0.152	0.123	0.16	0.0434	0.153	0.0416	0.148	6.49	1.85	0.0654	0.0168	0.802	0.0465	0.522
207338_s_at	7752	ZNF200	0.0509	0.249	-0.0139	0.775	-0.0717	0.108	-0.054	0.208	-0.0663	0.197	-0.13	0.00813	0.00373	0.935	0.0483	0.295	-0.012	0.817	-0.0112	0.799	-0.0329	4.72	-0.717	0.473	1	0.00131	0.983	-0.00111	0.983	0.0214	0.658	-0.0951	4.72	-1.84	0.0655	-0.0321	0.458	0.0295	0.527
238530_at	23530	NNT	-0.165	0.11	0.0531	0.639	-0.158	0.131	0.00899	0.928	-0.112	0.348	-0.31	0.00698	-0.00703	0.948	-0.105	0.33	0.0153	0.899	-0.0757	0.462	0.199	6.04	1.85	0.0644	0.923	-0.0402	0.786	0.172	0.147	-0.166	0.14	0.00841	6.04	0.0699	0.944	0.0489	0.627	-0.0687	0.528
205269_at	3937	LCP2	-0.0924	0.0914	-0.0812	0.177	-0.0321	0.562	-0.0479	0.368	-0.139	0.0293	-0.171	0.00511	0.000102	0.999	-0.0568	0.32	-0.0454	0.478	-0.0342	0.531	-0.082	4.02	-1.44	0.15	1	0.0128	0.871	-0.101	0.111	-0.0884	0.139	-0.0517	4.02	-0.809	0.419	-0.021	0.695	0.0365	0.528
207633_s_at	4593	MUSK	0.0394	0.666	0.037	0.712	-0.0267	0.773	-0.0219	0.804	0.0614	0.563	0.311	0.00223	-0.139	0.143	-0.012	0.899	-0.191	0.0742	-0.32	0.000458	0.0671	4.49	0.707	0.48	1	0.116	0.377	-0.128	0.225	0.142	0.154	-0.0436	4.49	-0.409	0.683	0.00265	0.976	0.0601	0.533
211764_s_at	7321	UBE2D1	0.0526	0.378	-0.132	0.0451	0.033	0.585	-0.027	0.641	-0.0296	0.671	-0.207	0.0019	-0.00275	0.965	0.021	0.736	0.0796	0.256	0.0387	0.516	0.0146	4.93	0.234	0.815	1	0.0352	0.682	-0.00474	0.945	-0.0315	0.629	-0.14	4.93	-2.01	0.0446	-0.138	0.018	-0.0384	0.544
78383_at	100129250	TOPORS-AS1	0.0807	0.137	0.0257	0.667	0.0538	0.327	0.065	0.218	0.0517	0.413	0.198	0.00111	0.024	0.67	-0.0504	0.373	0.0904	0.155	0.0479	0.376	-0.0182	6.4	-0.322	0.747	1	0.0699	0.369	0.0555	0.374	-0.00803	0.892	0.0379	6.4	0.599	0.549	0.0119	0.822	0.0346	0.546
223149_s_at	25930	PTPN23	-0.158	0.0771	0.0846	0.389	-0.15	0.0972	-0.0146	0.866	0.0716	0.491	0.282	0.00473	0.0443	0.634	0.00913	0.922	0.0556	0.596	0.0394	0.659	0.0142	5.84	0.153	0.878	0.982	-0.164	0.202	0.0986	0.338	0.159	0.105	0.203	5.84	1.95	0.0522	0.0271	0.757	-0.0563	0.552
202791_s_at	9701	PPP6R2	0.0641	0.414	-0.0428	0.62	0.154	0.0522	-0.0463	0.544	-0.00464	0.959	0.226	0.00997	0.0915	0.262	-0.00449	0.956	-0.0382	0.677	-0.138	0.0773	-0.0624	6.36	-0.766	0.444	1	0.168	0.135	-0.196	0.0301	0.0344	0.688	0.0326	6.36	0.356	0.722	-0.106	0.168	-0.0492	0.553
244727_at	10984	KCNQ1OT1	0.00418	0.953	-0.0133	0.865	0.00344	0.962	0.00149	0.983	0.02	0.81	0.237	0.00291	-0.121	0.103	-0.0035	0.962	-0.16	0.0554	-0.0285	0.689	-0.0313	4.87	-0.422	0.673	0.956	-0.000615	0.995	-0.183	0.0265	0.06	0.441	0.0156	4.87	0.187	0.852	-0.0446	0.523	0.0447	0.553
242317_at	25994	HIGD1A	0.0875	0.56	0.146	0.377	-0.13	0.392	-0.171	0.241	0.0594	0.734	-0.517	0.00205	0.0577	0.712	-0.0355	0.821	0.147	0.405	-0.17	0.257	0.0486	5.9	0.311	0.756	0.962	0.135	0.53	-0.351	0.0425	-0.232	0.158	-0.221	5.9	-1.26	0.209	-0.316	0.0316	-0.0939	0.554
209916_at	55526	DHTKD1	0.13	0.0961	0.0463	0.589	-0.0312	0.692	0.0653	0.388	0.0552	0.543	0.252	0.00385	0.0284	0.726	-0.0145	0.858	0.0213	0.816	-0.149	0.0554	0.121	5.2	1.49	0.136	1	0.198	0.0769	0.162	0.0708	0.039	0.647	-0.0826	5.2	-0.908	0.364	0.0712	0.35	0.0487	0.555
240822_at	55775	TDP1	0.139	0.107	-0.0211	0.824	0.153	0.0792	-0.0578	0.489	0.0464	0.643	0.331	0.000587	-0.175	0.0514	-0.0587	0.513	-0.0755	0.454	-0.0926	0.281	0.000615	3.86	0.00687	0.995	0.999	0.0868	0.482	-0.0755	0.446	0.092	0.328	0.0302	3.86	0.301	0.764	0.108	0.198	-0.0531	0.559
212267_at	23063	WAPAL	0.333	0.0323	-0.33	0.0538	0.256	0.104	0.0174	0.908	0.127	0.483	-0.454	0.00885	0.331	0.041	0.164	0.313	0.122	0.504	0.0641	0.679	0.0145	6.03	0.0899	0.928	1	0.168	0.452	0.144	0.422	-0.251	0.14	-0.139	6.03	-0.765	0.444	-0.228	0.133	0.0959	0.559
209255_at	23008	KLHDC10	-0.0425	0.776	-0.26	0.115	-0.376	0.0133	-0.145	0.318	-0.0678	0.697	-0.444	0.00799	-0.0682	0.661	-0.0649	0.678	-0.0821	0.64	-0.0313	0.834	-0.329	7.64	-2.11	0.035	1	-0.247	0.251	0.364	0.0352	-0.183	0.263	-0.0248	7.64	-0.141	0.888	-0.441	0.00272	-0.0912	0.565
229700_at	148203	ZNF738	-0.0998	0.508	-0.238	0.151	0.0748	0.624	0.137	0.351	-0.0965	0.583	-0.455	0.00688	0.326	0.0378	-0.123	0.435	0.188	0.287	-0.0838	0.578	-0.0262	5.65	-0.167	0.868	0.98	0.00321	0.988	-0.00445	0.98	-0.243	0.142	-0.359	5.65	-2.03	0.0423	-0.456	0.00207	0.0914	0.567
235115_at	8622	PDE8B	0.0534	0.517	0.0316	0.727	-0.107	0.198	0.0534	0.505	-0.0436	0.649	-0.295	0.00135	-0.0698	0.415	-0.0577	0.502	-0.126	0.192	0.00269	0.974	-0.0131	4.55	-0.153	0.878	0.982	0.0985	0.404	-0.036	0.705	0.065	0.47	-0.117	4.55	-1.21	0.225	-0.0229	0.777	0.049	0.573
238483_at	23635	SSBP2	0.17	0.138	-0.00605	0.962	-0.0864	0.457	0.0481	0.666	-0.0411	0.759	-0.361	0.00485	0.0677	0.571	0.0154	0.898	0.0895	0.506	0.0207	0.856	-0.0752	4.07	-0.629	0.529	0.934	0.129	0.434	-0.0294	0.824	-0.241	0.0547	-0.117	4.07	-0.875	0.382	-0.0644	0.566	0.0684	0.573
224821_at	84836	ABHD14B	-0.0155	0.857	0.103	0.277	0.0577	0.508	-0.00528	0.95	-0.0939	0.35	0.295	0.0022	0.236	0.00859	0.0817	0.364	-0.0589	0.56	-0.174	0.043	-0.0526	6.7	-0.586	0.558	0.934	-0.155	0.211	-0.0591	0.552	0.0621	0.51	-0.0427	6.7	-0.424	0.672	-0.109	0.198	-0.0513	0.574
227261_at	11278	KLF12	0.23	0.179	0.108	0.567	-0.197	0.256	-0.121	0.467	0.276	0.166	-0.496	0.00948	0.235	0.188	0.0319	0.858	0.258	0.199	-0.196	0.252	-0.144	7.18	-0.809	0.419	0.923	-0.136	0.579	-0.233	0.237	-0.187	0.319	-0.45	7.18	-2.25	0.0249	-0.422	0.0119	-0.0994	0.583
229090_at	220930	ZEB1-AS1	-0.0114	0.887	-0.0381	0.666	-0.00993	0.903	0.0485	0.535	0.0866	0.355	-0.25	0.00537	-0.0148	0.859	0.19	0.0242	-0.00869	0.926	0.044	0.584	0.0149	5.05	0.178	0.859	0.98	0.205	0.076	-0.122	0.188	-0.193	0.0284	-0.0562	5.05	-0.598	0.55	0.0392	0.618	-0.0465	0.584
243278_at	93986	FOXP2	0.0754	0.52	0.143	0.268	-0.104	0.378	-0.0231	0.839	-0.126	0.355	-0.37	0.00468	0.00201	0.987	-0.00267	0.983	0.127	0.354	0.0419	0.72	-0.103	4.31	-0.843	0.399	0.923	-0.0392	0.816	-0.132	0.328	-0.184	0.15	-0.166	4.31	-1.21	0.225	-0.199	0.0833	0.0671	0.588
229828_at	79577	CDC73	0.131	0.168	-0.123	0.24	-0.0897	0.351	0.0161	0.862	0.0525	0.635	-0.283	0.0077	0.0887	0.37	0.0434	0.662	0.00665	0.952	-0.0346	0.716	-0.0208	5.04	-0.211	0.833	0.977	-0.0978	0.473	-0.0919	0.401	-0.0972	0.349	-0.298	5.04	-2.69	0.00739	-0.213	0.0219	0.0543	0.589
229126_at	55266	TMEM19	0.177	0.136	0.099	0.448	0.0257	0.83	0.00255	0.982	0.139	0.315	-0.354	0.00749	0.084	0.496	-0.064	0.605	0.116	0.405	0.0756	0.523	0.0458	6.56	0.371	0.711	0.961	-0.1	0.555	-0.124	0.363	-0.0205	0.874	-0.19	6.56	-1.37	0.17	-0.229	0.0483	-0.0677	0.589
227163_at	119391	GSTO2	-0.0521	0.505	0.0554	0.518	0.175	0.0273	-0.0323	0.671	-0.00191	0.983	0.319	0.00026	-0.0195	0.81	0.083	0.308	0.0386	0.673	0.0207	0.79	-0.0592	6.5	-0.729	0.467	0.923	-0.0495	0.658	-0.0823	0.36	0.112	0.191	-0.0693	6.5	-0.76	0.448	-0.108	0.158	0.0439	0.595
235690_at	84622	ZNF594	0.0731	0.213	-0.00701	0.914	-0.115	0.0534	-0.0154	0.787	-0.0677	0.322	-0.182	0.00558	0.0695	0.256	-0.0153	0.803	0.041	0.551	-0.0185	0.752	-0.0678	3.86	-1.11	0.267	0.923	-0.0141	0.867	0.038	0.574	-0.0365	0.569	-0.0665	3.86	-0.97	0.333	-0.108	0.0611	-0.0327	0.598
218983_at	51279	C1RL	-0.00504	0.925	-0.112	0.0579	-0.0345	0.527	-0.0511	0.329	0.0255	0.683	-0.182	0.00244	-0.0508	0.364	0.0115	0.838	-0.0514	0.415	-0.0668	0.214	-0.127	3.96	-2.28	0.0232	1	-0.0805	0.297	-0.056	0.366	-0.0479	0.416	-0.0988	3.96	-1.57	0.117	-0.0832	0.114	0.0289	0.611
243112_at	100996424	LOC100996424	0.154	0.0215	0.0657	0.371	0.0715	0.291	-0.000621	0.992	0.000928	0.99	0.211	0.00469	-0.0724	0.298	0.00997	0.886	0.0265	0.735	-0.00395	0.953	0.156	5.86	2.25	0.025	0.923	-0.111	0.246	-0.0353	0.646	0.112	0.127	0.158	5.86	2.03	0.0432	0.12	0.066	0.0358	0.613
230203_at	440918	FLJ46875	-0.0967	0.158	0.0229	0.76	0.0681	0.326	0.0747	0.261	0.142	0.0743	0.223	0.00355	0.0144	0.84	0.0377	0.597	-0.039	0.627	0.126	0.0658	0.0899	6.75	1.26	0.207	0.923	-0.15	0.128	0.0762	0.334	0.174	0.0199	0.0948	6.75	1.19	0.236	0.0772	0.249	0.0359	0.62
229970_at	84078	KBTBD7	-0.0108	0.906	0.0871	0.387	-0.00605	0.948	-0.0572	0.52	0.0376	0.724	-0.265	0.00957	-0.0149	0.875	0.0318	0.739	0.17	0.113	0.04	0.661	-0.0371	4.19	-0.389	0.697	0.956	0.0395	0.763	-0.124	0.24	-0.0721	0.471	-0.0769	4.19	-0.719	0.473	-0.179	0.0457	0.0476	0.622
201862_s_at	9208	LRRFIP1	-0.108	0.347	-0.263	0.0378	-0.104	0.372	-0.0844	0.451	-0.224	0.0945	-0.634	9.57e-07	0.0588	0.624	0.0105	0.931	0.129	0.341	-0.081	0.481	-0.0093	4.84	-0.0776	0.938	1	-0.0995	0.547	0.171	0.199	-0.387	0.00217	-0.0976	4.84	-0.725	0.469	-0.219	0.0516	0.0598	0.623
226145_s_at	80144	FRAS1	-0.075	0.66	0.0821	0.662	-0.204	0.237	-0.116	0.484	0.0417	0.834	-0.506	0.0079	-0.145	0.415	-0.211	0.236	0.257	0.199	-0.343	0.0442	-0.0881	5.66	-0.496	0.62	0.946	0.00209	0.993	-0.297	0.131	-0.589	0.00163	-0.11	5.66	-0.552	0.581	-0.428	0.0105	-0.0886	0.624
242674_at	1977	EIF4E	0.103	0.331	0.0324	0.781	-0.14	0.193	-0.0133	0.898	0.0804	0.515	-0.317	0.00741	-0.00312	0.977	-0.0451	0.683	0.0478	0.7	-0.0698	0.51	0.0126	7.56	0.115	0.909	0.985	0.0785	0.606	-0.246	0.0445	-0.0751	0.517	-0.104	7.56	-0.839	0.402	-0.161	0.12	0.055	0.624
231623_at	134288	TMEM174	0.0282	0.698	0.0323	0.685	0.0302	0.681	-0.00919	0.896	-0.0297	0.724	0.224	0.00563	-0.195	0.00996	0.0719	0.342	0.0412	0.627	0.00299	0.967	0.1	6.01	1.33	0.184	0.923	-0.0186	0.858	-0.0726	0.384	0.156	0.0494	0.0513	6.01	0.606	0.545	-0.0217	0.759	0.0373	0.627
209318_x_at	5325	PLAGL1	-0.0491	0.578	-0.0762	0.432	-0.168	0.0608	-0.177	0.0389	-0.123	0.23	-0.424	1.78e-05	-0.0635	0.488	-0.101	0.271	0.381	0.000243	-0.0543	0.537	-0.0491	4.64	-0.535	0.593	1	0.0106	0.933	0.0305	0.764	-0.0869	0.367	-0.068	4.64	-0.66	0.51	-0.171	0.0477	-0.0447	0.632
205709_s_at	1040	CDS1	0.0642	0.649	-0.256	0.0985	-0.139	0.331	-0.0798	0.56	-0.2	0.223	-0.431	0.0062	-0.0862	0.557	-0.0426	0.772	0.146	0.375	-0.126	0.369	-0.0296	6.21	-0.202	0.84	1	-0.0334	0.869	0.114	0.482	-0.185	0.23	0.111	6.21	0.675	0.5	-0.117	0.396	-0.0713	0.632
218422_s_at	64062	RBM26	0.321	0.0222	-0.152	0.326	0.222	0.118	0.00475	0.972	-0.0136	0.934	-0.412	0.00847	0.165	0.257	0.0542	0.711	0.37	0.0245	-0.129	0.356	-0.074	5.35	-0.508	0.612	1	0.153	0.447	-0.0115	0.943	-0.179	0.242	-0.363	5.35	-2.21	0.0272	-0.342	0.0128	0.0703	0.635
218411_s_at	51562	MBIP	0.0887	0.0853	-0.0469	0.407	-0.0502	0.336	0.00109	0.983	-0.0468	0.435	-0.249	1.57e-05	-0.0313	0.559	-0.00446	0.934	0.0287	0.635	0.0524	0.308	-0.0775	5.26	-1.45	0.149	1	0.0974	0.187	0.0817	0.168	0.0409	0.467	-0.0712	5.26	-1.18	0.237	-0.0971	0.054	0.0255	0.64
202660_at	3709	ITPR2	0.186	0.0381	-0.153	0.12	0.103	0.256	0.0259	0.765	-0.0449	0.666	-0.314	0.00165	0.00617	0.947	0.0274	0.769	0.0443	0.672	-0.000989	0.991	-0.0853	4.31	-0.916	0.36	1	0.0815	0.525	0.154	0.136	-0.0935	0.339	-0.116	4.31	-1.11	0.266	-0.161	0.0655	-0.0441	0.641
216713_at	889	KRIT1	0.254	0.0425	-0.179	0.194	-0.0196	0.877	-0.167	0.171	-0.0107	0.942	-0.578	3.79e-05	0.00272	0.983	0.0472	0.717	0.212	0.149	-0.0167	0.894	-0.0273	4.68	-0.21	0.834	1	0.0457	0.799	-0.0423	0.769	-0.116	0.396	-0.282	4.68	-1.93	0.0545	-0.372	0.00241	0.0609	0.645
203970_s_at	8504	PEX3	0.168	0.0282	-0.0973	0.248	0.0218	0.779	-0.000626	0.993	0.00227	0.98	-0.286	0.000829	-0.0193	0.809	0.13	0.104	0.0957	0.286	0.0499	0.513	0.00969	4.25	0.122	0.903	1	0.068	0.536	-0.0884	0.316	-0.0777	0.352	-0.0341	4.25	-0.381	0.703	-0.167	0.0262	0.0365	0.652
203898_at	27297	CRCP	0.152	0.0488	-0.194	0.022	0.0554	0.477	0.0604	0.419	-0.0257	0.774	-0.292	0.000699	0.0179	0.823	-0.00627	0.938	0.0313	0.728	0.119	0.122	-0.0116	5.45	-0.145	0.885	1	0.0333	0.763	0.0496	0.576	-0.0508	0.546	0.061	5.45	0.678	0.498	-0.123	0.102	-0.0366	0.653
223651_x_at	8697	CDC23	0.104	0.273	-0.0178	0.865	-0.131	0.173	0.0822	0.374	-0.0515	0.642	-0.358	0.00077	0.0143	0.885	-0.17	0.0877	-0.0394	0.724	-0.115	0.226	0.0394	4.72	0.398	0.691	0.956	0.0676	0.621	-0.206	0.0607	-0.129	0.216	-0.052	4.72	-0.468	0.64	-0.148	0.112	-0.045	0.655
204225_at	9759	HDAC4	0.297	0.0376	-0.186	0.237	0.107	0.459	-0.24	0.0838	0.18	0.279	-0.422	0.00812	0.202	0.173	0.174	0.244	0.237	0.156	0.111	0.435	-0.00627	5.56	-0.0422	0.966	1	0.0819	0.689	-0.204	0.214	-0.185	0.235	-0.0999	5.56	-0.599	0.55	-0.27	0.0538	-0.0659	0.663
228418_at	10640	EXOC5	0.0867	0.398	-0.0729	0.518	-0.0826	0.426	0.0615	0.537	0.0214	0.858	-0.317	0.00568	0.171	0.109	-0.0465	0.664	0.105	0.382	0.0716	0.484	0.0481	4.96	0.451	0.652	0.953	0.0777	0.597	0.0301	0.799	-0.169	0.132	-0.349	4.96	-2.92	0.00366	-0.092	0.359	0.0469	0.665
221751_at	79646	PANK3	0.209	0.181	-0.363	0.0346	0.0661	0.675	-0.231	0.127	-0.0297	0.87	-0.505	0.00376	0.0611	0.707	0.0431	0.791	0.19	0.3	0.0111	0.943	-0.105	7.07	-0.647	0.518	1	0.0725	0.746	-0.112	0.532	-0.395	0.0207	-0.322	7.07	-1.77	0.0774	-0.452	0.00313	-0.0713	0.665
218351_at	54951	COMMD8	0.0336	0.753	-0.273	0.0205	0.029	0.789	-0.0923	0.374	-0.0382	0.759	-0.31	0.00953	-0.0592	0.594	0.0519	0.642	0.0826	0.51	0.113	0.292	0.0229	6.62	0.206	0.837	1	0.0162	0.916	-0.172	0.164	-0.11	0.347	-0.0945	6.62	-0.755	0.45	-0.05	0.633	0.0489	0.666
215030_at	2926	GRSF1	0.0655	0.666	-0.0911	0.585	0.195	0.203	0.00574	0.969	0.111	0.528	-0.47	0.00556	0.16	0.311	0.0659	0.677	0.199	0.264	-0.0142	0.925	-0.164	6.35	-1.04	0.298	1	0.00544	0.98	-0.00802	0.963	-0.157	0.342	-0.149	6.35	-0.838	0.402	-0.334	0.0248	0.0687	0.669
215554_at	2822	GPLD1	0.0288	0.677	-0.0491	0.518	-0.134	0.0557	-0.0348	0.605	-0.0858	0.286	-0.252	0.00112	-0.0745	0.3	-0.114	0.115	0.053	0.513	-0.0547	0.428	-0.0261	4.17	-0.364	0.716	1	-0.0392	0.692	0.0779	0.328	0.0177	0.814	0.0357	4.17	0.442	0.659	-0.119	0.0797	0.0309	0.672
229174_at	285237	C3orf38	0.103	0.255	-0.12	0.227	-0.036	0.693	-0.00323	0.971	0.107	0.309	-0.291	0.00386	0.0457	0.625	-0.0481	0.609	0.00558	0.958	-0.0216	0.81	-0.157	3.97	-1.68	0.094	0.923	-0.0513	0.691	-0.117	0.258	-0.224	0.023	-0.217	3.97	-2.06	0.0399	-0.167	0.0584	0.04	0.675
222551_s_at	65265	C8orf33	-0.0985	0.203	-0.0268	0.753	0.0614	0.433	0.0193	0.798	-0.0199	0.825	0.251	0.00365	-0.139	0.0842	0.119	0.14	-0.145	0.11	0.0595	0.442	-0.0587	6.59	-0.729	0.466	0.923	0.199	0.0738	0.0303	0.734	0.028	0.741	0.0256	6.59	0.283	0.777	0.0741	0.328	-0.0336	0.681
219571_s_at	7559	ZNF12	-0.126	0.448	-0.255	0.163	-0.0513	0.76	-0.168	0.298	-0.00812	0.967	-0.535	0.00394	0.117	0.498	-0.131	0.449	0.451	0.0207	-0.0846	0.61	-0.0356	5.24	-0.206	0.837	1	-0.105	0.66	0.643	0.000815	-0.239	0.189	0.0374	5.24	0.193	0.847	-0.415	0.0109	-0.0717	0.683
229736_at	255043	TMEM86B	-0.0719	0.383	0.193	0.0332	0.054	0.517	-0.0343	0.668	0.0843	0.38	0.255	0.0056	-0.0299	0.727	0.023	0.789	0.0659	0.495	-0.0301	0.715	-0.0241	5.84	-0.281	0.779	0.97	-0.111	0.349	-0.113	0.235	0.12	0.183	0.122	5.84	1.27	0.205	-0.00243	0.976	-0.0351	0.687
241368_at	440503	PLIN5	0.118	0.131	-0.035	0.683	0.0174	0.826	-0.00424	0.956	0.0812	0.372	0.269	0.00203	-0.22	0.00699	0.0158	0.846	-0.0348	0.704	0.0734	0.347	0.0295	6.78	0.363	0.717	0.961	-0.0365	0.745	0.0287	0.75	0.116	0.176	0.081	6.78	0.887	0.375	0.0688	0.368	0.0331	0.689
202035_s_at	6422	SFRP1	-0.0647	0.143	-0.00678	0.889	-0.000407	0.993	0.0567	0.186	0.0394	0.443	0.13	0.00807	0.0537	0.242	0.00619	0.893	0.0118	0.819	0.0199	0.652	0.0257	4.27	0.56	0.576	1	0.017	0.788	-0.0369	0.468	-0.000363	0.994	-0.01	4.27	-0.194	0.846	0.0308	0.476	-0.0184	0.694
212917_x_at	5965	RECQL	0.0519	0.432	-0.168	0.0209	0.0302	0.652	-0.0427	0.506	-0.0957	0.213	-0.225	0.00225	0.0201	0.77	-0.0202	0.77	0.129	0.0965	0.0135	0.838	0.0281	4.24	0.409	0.683	1	0.056	0.554	0.211	0.0056	-0.0387	0.591	0.0887	4.24	1.15	0.25	-0.105	0.105	0.0274	0.694
225031_at	84181	CHD6	0.111	0.294	-0.0406	0.728	-0.0048	0.964	0.0201	0.845	0.135	0.272	-0.311	0.00865	0.198	0.0733	-0.00401	0.971	0.114	0.36	-0.0488	0.645	-0.022	7.16	-0.199	0.842	0.979	-0.048	0.752	-0.252	0.0393	-0.118	0.309	-0.149	7.16	-1.2	0.231	-0.213	0.0398	0.0438	0.696
213064_at	79882	ZC3H14	0.208	0.19	-0.354	0.0432	0.0554	0.73	-0.136	0.378	0.132	0.477	-0.488	0.00592	0.107	0.516	0.0545	0.743	0.379	0.0423	0.076	0.632	-0.0214	6.6	-0.129	0.897	1	0.00676	0.976	0.429	0.0194	-0.17	0.328	-0.0313	6.6	-0.168	0.866	-0.399	0.0105	-0.064	0.703
242954_at	101059948	LOC101059948	0.0547	0.577	-0.1	0.353	0.201	0.0432	-0.139	0.144	0.0288	0.801	0.32	0.00345	-0.137	0.179	0.0185	0.857	-0.0726	0.528	0.104	0.288	-0.0278	4.85	-0.272	0.785	0.972	-0.0379	0.787	-0.0307	0.786	0.0108	0.919	0.256	4.85	2.23	0.0259	0.088	0.359	-0.0388	0.708
235398_at	390980	ZNF805	-0.0328	0.561	0.0405	0.514	-0.0259	0.65	0.0577	0.293	0.0127	0.846	-0.163	0.00984	0.0535	0.362	-0.0561	0.341	-0.0881	0.183	0.041	0.467	0.000994	4.42	0.0169	0.987	0.998	0.0594	0.463	-0.0643	0.323	-0.0151	0.806	-0.0431	4.42	-0.653	0.514	0.00669	0.903	0.0221	0.711
229428_at	100287932	TIMM23	-0.208	0.0819	0.0398	0.761	-0.12	0.32	-0.0479	0.679	-0.17	0.221	-0.349	0.00869	0.259	0.0373	-0.0786	0.528	-0.0316	0.821	-0.000959	0.994	0.0662	6.68	0.533	0.594	0.942	-0.0545	0.75	-0.0215	0.876	-0.136	0.297	-0.0789	6.68	-0.566	0.571	-0.337	0.00394	-0.0464	0.713
235499_at	728743	LOC728743	-0.109	0.294	0.0748	0.513	0.178	0.0925	-0.0214	0.833	0.0333	0.783	0.302	0.00935	-0.117	0.278	0.238	0.029	0.0221	0.856	0.119	0.253	0.0124	5.29	0.114	0.909	0.985	-0.037	0.804	0.177	0.141	0.0426	0.708	0.236	5.29	1.93	0.0534	0.169	0.0975	-0.0399	0.717
224697_at	8816	DCAF5	0.0612	0.53	0.00823	0.939	0.19	0.0549	-0.0282	0.766	0.144	0.205	0.401	0.000232	-0.0552	0.586	0.106	0.296	0.0873	0.444	0.0579	0.552	-0.0793	5.13	-0.782	0.434	0.923	-0.206	0.141	-0.00538	0.962	-0.00683	0.949	0.086	5.13	0.756	0.45	0.0986	0.301	0.0365	0.723
212989_at	259230	SGMS1	0.176	0.171	-0.209	0.139	0.213	0.102	-0.00921	0.941	0.0745	0.618	-0.394	0.00591	0.184	0.169	0.139	0.298	0.195	0.195	0.0378	0.768	-0.0274	4.91	-0.205	0.838	1	0.0239	0.896	0.108	0.464	-0.228	0.104	-0.25	4.91	-1.66	0.0964	-0.315	0.0124	0.0477	0.725
33778_at	25771	TBC1D22A	-0.0866	0.0771	0.0214	0.691	-0.0451	0.363	0.0137	0.773	-0.0252	0.658	-0.18	0.00104	-0.0964	0.0585	-0.00526	0.918	-0.109	0.057	0.0887	0.0698	-0.0886	8.03	-1.74	0.0825	1	0.0064	0.927	-0.018	0.75	-0.0555	0.299	0.0269	8.03	0.47	0.639	-0.0222	0.643	0.0177	0.732
241730_at	55892	MYNN	0.0157	0.73	-0.0429	0.392	-0.00608	0.895	0.0568	0.2	-0.0396	0.456	-0.135	0.00802	-0.0631	0.183	-0.0136	0.776	-0.0396	0.458	-0.021	0.645	-0.0193	3.6	-0.407	0.684	0.956	0.00351	0.957	-0.0381	0.468	0.013	0.794	0.00182	3.6	0.0342	0.973	-0.012	0.787	-0.0165	0.732
202034_x_at	9821	RB1CC1	0.344	0.0217	-0.174	0.29	0.139	0.36	-0.0784	0.59	0.0666	0.702	-0.476	0.00439	-0.172	0.269	0.102	0.514	0.301	0.0859	-0.148	0.323	-0.0789	5.77	-0.507	0.613	1	0.0783	0.715	-0.0359	0.835	-0.138	0.397	-0.198	5.77	-1.13	0.258	-0.423	0.00395	-0.0541	0.732
222550_at	55156	ARMC1	0.141	0.358	-0.102	0.546	-0.0126	0.935	-0.00739	0.961	-0.0116	0.948	-0.462	0.00713	0.27	0.0913	-0.179	0.266	0.177	0.327	-0.215	0.161	-0.251	8.18	-1.57	0.117	0.923	-0.0778	0.724	0.0955	0.59	-0.333	0.0478	-0.316	8.18	-1.76	0.079	-0.441	0.00347	-0.0549	0.736
235418_at	51011	FAHD2A	0.0835	0.33	0.0704	0.455	0.129	0.136	0.034	0.683	0.00718	0.943	0.327	0.000631	-0.253	0.00455	0.136	0.129	-0.00971	0.923	-0.0436	0.61	-0.0199	7.04	-0.224	0.823	0.977	-0.0777	0.527	0.0123	0.9	0.0414	0.658	0.133	7.04	1.33	0.184	-0.0384	0.647	0.0305	0.736
239426_at	29988	SLC2A8	0.0835	0.27	0.144	0.0834	0.158	0.0394	0.0132	0.857	0.0657	0.456	0.228	0.00697	0.0723	0.359	0.128	0.106	0.0421	0.635	-0.0149	0.843	0.0363	4.58	0.461	0.645	0.951	-0.134	0.217	0.0447	0.608	0.0295	0.721	0.0958	4.58	1.08	0.28	0.149	0.0444	0.0269	0.737
209838_at	9318	COPS2	0.0105	0.903	-0.114	0.23	-0.121	0.166	-0.0458	0.587	-0.0192	0.849	-0.363	0.000186	0.00562	0.95	0.00879	0.923	0.157	0.123	-0.0178	0.838	-0.0565	5.99	-0.626	0.531	1	0.0326	0.793	0.0767	0.442	-0.0322	0.734	-0.0277	5.99	-0.274	0.784	-0.216	0.0109	0.0302	0.742
232790_at	100506054	LOC100506054	0.0196	0.825	0.0242	0.804	0.145	0.108	0.116	0.18	0.000714	0.994	0.319	0.00135	0.00752	0.935	0.0835	0.368	-0.0861	0.408	-0.127	0.152	0.0529	4.52	0.571	0.568	0.935	0.186	0.144	0.0597	0.56	0.0998	0.304	0.0834	4.52	0.803	0.422	0.00656	0.94	0.031	0.742
235918_x_at	79598	CEP97	0.123	0.328	-0.3	0.0306	0.00525	0.967	0.0855	0.485	-0.131	0.372	-0.363	0.00991	0.241	0.067	-0.0628	0.633	0.0975	0.509	-0.000555	0.996	0.00414	5.36	0.0315	0.975	0.995	0.135	0.456	0.0859	0.554	-0.203	0.142	-0.331	5.36	-2.24	0.0253	-0.0419	0.734	0.0432	0.746
228150_at	89866	SEC16B	-0.0733	0.393	0.0132	0.889	-0.0977	0.261	0.0802	0.337	-0.00243	0.981	-0.276	0.00404	-0.0132	0.882	-0.0543	0.545	-0.0418	0.678	-0.0743	0.386	0.128	5.99	1.43	0.152	0.923	0.0652	0.596	-0.0562	0.57	-0.0587	0.531	-0.141	5.99	-1.4	0.161	-0.25	0.00296	0.029	0.749
207002_s_at	5325	PLAGL1	-0.0113	0.879	-0.106	0.195	-0.0311	0.679	-0.125	0.0827	-0.0745	0.389	-0.283	0.000664	-0.0122	0.875	-0.00908	0.907	0.202	0.0203	-0.0106	0.887	-0.0883	4.05	-1.14	0.254	1	0.0152	0.886	-0.0871	0.309	-0.0623	0.443	-0.0652	4.05	-0.751	0.453	-0.119	0.101	-0.0248	0.752
202630_at	10513	APPBP2	0.259	0.119	-0.166	0.362	0.239	0.155	-0.145	0.366	0.0399	0.836	-0.494	0.00753	0.11	0.521	0.0722	0.676	0.188	0.333	0.00254	0.988	-0.118	8.14	-0.683	0.495	1	-0.00567	0.981	-0.0266	0.889	-0.212	0.242	-0.263	8.14	-1.36	0.175	-0.499	0.00215	-0.0552	0.753
223501_at	10673	TNFSF13B	-0.192	0.111	-0.036	0.786	-0.279	0.022	-0.121	0.303	-0.276	0.0485	-0.496	0.000229	0.0734	0.557	-0.0992	0.43	-0.014	0.921	0.0809	0.501	-0.105	5.67	-0.838	0.402	0.923	-0.315	0.0681	-0.238	0.0864	-0.275	0.037	-0.192	5.67	-1.37	0.172	-0.146	0.215	-0.04	0.753
223261_at	51426	POLK	-0.0158	0.901	-0.197	0.157	-0.122	0.344	-0.102	0.41	-0.132	0.373	-0.436	0.00211	0.369	0.00524	-0.0689	0.603	0.344	0.0208	-0.0866	0.494	-0.153	3.87	-1.16	0.246	0.923	0.142	0.434	0.37	0.0114	-0.284	0.0411	-0.267	3.87	-1.8	0.0725	-0.418	0.000788	-0.042	0.754
223978_s_at	54675	CRLS1	-0.0348	0.781	-0.172	0.211	-0.205	0.104	-0.136	0.262	-0.0304	0.834	-0.459	0.000999	0.208	0.11	-0.083	0.524	0.183	0.211	-0.0589	0.636	-0.0458	6.78	-0.353	0.724	0.961	0.00239	0.989	0.0242	0.866	-0.381	0.0053	-0.329	6.78	-2.25	0.0246	-0.36	0.00329	-0.0413	0.755
207056_s_at	9498	SLC4A8	0.102	0.367	0.0336	0.786	-0.00757	0.947	-0.144	0.19	-0.104	0.429	-0.376	0.00282	-0.0696	0.553	-0.0767	0.514	0.273	0.039	-0.0944	0.402	-0.0968	5.05	-0.826	0.409	1	0.0241	0.881	0.185	0.155	-0.0678	0.582	-0.0938	5.05	-0.712	0.477	-0.187	0.0906	0.037	0.756
204235_s_at	51454	GULP1	-0.0375	0.774	-0.104	0.469	-0.197	0.137	-0.264	0.0382	-0.0955	0.531	-0.477	0.00112	-0.0959	0.481	-0.154	0.26	0.0751	0.624	-0.00273	0.983	-0.0212	5.77	-0.156	0.876	1	-0.074	0.694	0.345	0.0223	-0.0617	0.667	0.106	5.77	0.689	0.491	-0.16	0.211	-0.0424	0.76
206281_at	116	ADCYAP1	-0.0749	0.411	-0.0617	0.538	-0.18	0.0514	-0.0347	0.695	-0.0861	0.416	-0.324	0.00145	-0.138	0.145	-0.0648	0.495	0.0611	0.566	-0.0639	0.482	0.00707	5.72	0.0747	0.941	1	-0.0759	0.561	-0.137	0.191	-0.0385	0.698	0.0907	5.72	0.853	0.394	-0.129	0.149	-0.0293	0.761
220592_at	55036	CCDC40	-0.0238	0.778	0.209	0.0247	-0.149	0.0808	0.068	0.407	-0.0564	0.566	0.249	0.00831	-0.15	0.0878	0.117	0.183	-0.136	0.17	-0.0645	0.444	0.0254	5.35	0.29	0.772	1	-0.00088	0.994	-0.00363	0.97	0.227	0.0142	0.109	5.35	1.11	0.269	0.163	0.0489	-0.0271	0.762
212279_at	27346	TMEM97	-0.134	0.271	0.0402	0.764	-0.199	0.107	-0.0527	0.657	-0.0327	0.818	-0.362	0.00784	-0.128	0.313	-0.00751	0.953	0.0347	0.808	-0.141	0.246	0.0159	7.07	0.126	0.9	1	0.116	0.509	0.311	0.0274	-0.068	0.61	0.121	7.07	0.845	0.398	-0.114	0.339	-0.0391	0.762
219802_at	79912	PYROXD1	0.106	0.508	-0.206	0.242	0.16	0.324	-0.0194	0.901	0.000773	0.997	-0.689	0.000122	0.00312	0.985	-0.00538	0.974	-0.0423	0.822	0.118	0.462	-0.059	6.47	-0.354	0.724	1	-0.0542	0.813	0.452	0.0145	-0.368	0.0356	-0.0583	6.47	-0.311	0.756	-0.256	0.102	0.051	0.764
221568_s_at	55327	LIN7C	0.163	0.131	-0.271	0.0224	0.00439	0.968	0.0715	0.495	-0.0573	0.648	-0.354	0.00324	-0.0779	0.487	0.11	0.329	0.0501	0.691	0.0226	0.834	-0.0165	6.13	-0.147	0.883	1	0.0949	0.539	0.125	0.316	-0.232	0.0491	-0.193	6.13	-1.54	0.125	-0.343	0.0012	0.034	0.766
228026_at	80143	SIKE1	0.102	0.367	-0.0968	0.438	-0.19	0.0975	-0.175	0.112	0.0476	0.718	-0.33	0.00923	0.204	0.0835	-0.0309	0.794	0.0845	0.525	-0.224	0.0482	-0.0968	4.69	-0.82	0.412	0.923	-0.0225	0.89	-0.182	0.165	-0.29	0.0197	-0.423	4.69	-3.19	0.0015	-0.264	0.0176	0.0358	0.766
236648_at	8833	GMPS	-0.0992	0.216	0.0895	0.31	-0.179	0.0277	-0.0763	0.327	-0.0974	0.296	-0.264	0.00315	-0.119	0.155	-0.0199	0.812	-0.126	0.181	-0.052	0.516	0.0412	5.62	0.495	0.621	0.946	-0.12	0.297	-0.0536	0.562	-0.117	0.183	-0.0945	5.62	-1.01	0.313	-0.0744	0.342	-0.0248	0.77
[truncated: 4,320 more rows]

## Sheet: Brain DEGs in 2 regions
Probesets	Entrez.Gene	Symbol	logFC_AG	P.Value_AG	logFC_NA	P.Value_NA
[truncated: 1,966 more rows]
