# Supplementary material for: Systematic Analysis and Biomarker Study for Alzheimer’s Disease
Source: Sci Rep. 2018 Nov 26;8:17394. doi: 10.1038/s41598-018-35789-3 (PMC6255913; doi:10.1038/s41598-018-35789-3)
Supplement: Supplementary file 5 — Supplementary Table 5 [file 41598_2018_35789_MOESM5_ESM.xlsx]

## Sheet: IGAP_MAGMA_BF.05_blood
Gene Annotation					IGAP MAGMA Analysis (SNPs are 20kbp up/down stream of the gene)														AD Analysis in Blood					MCI Analysis in Blood					AD meta-analysis in Brain
Entrez_Gene_ID	Name	CHR	START	STOP	NSNPS	NPARAM	N	ZSTAT	P	BF.pval	SNP.Position	SNPID	Effect_allele	Non_Effect_allele	SNP.Beta	SNP.SE	GWAS.Pvalue	SNP.Strand	Fold-Change	AveExpr	t	P.Value	BH.pval	Fold-Change	AveExpr	t	P.Value	BF.pval	metaZscore	metaPval	effect	Pval.adj	BF.pval	maxFC	avgFC	BraakR	AtrophyR	Ageing	AD.risk
10452	TOMM40	19	45374477	45426946	139	27	54162	26.458	1.49e-154	2.71612e-150	45427125	rs111789331	A	T	1.3811	0.0321	0	-	1.02655	8.406	1.95977	0.0505131	0.135567	1.05939	8.406	3.83686	0.000138643	0.000686759	-3.79631	0.000146866	-----+	0.000600479	1	0.794727	0.921148		-0.4895		Yes
341	APOC1	19	45397577	45442606	82	17	54162	25.121	1.48e-139	2.69789e-135	45387459	rs12972156	G	C	1.1399	0.0256	0	+	1.00351	6.74886	0.711202	0.477252	0.665952	1.00825	6.74886	1.48441	0.138258	0.253297	4.13197	3.5966e-05	++?+++	0.000178202	0.84628	1.4545	1.26575
348	APOE	19	45389039	45432650	97	17	54162	24.775	8.36e-136	1.52394e-131	45387459	rs12972156	G	C	1.1399	0.0256	0	+																					Yes
5819	PVRL2	19	45329393	45412485	268	31	54162	24.179	1.83e-129	3.33591e-125	45413576	rs75627662	T	C	0.879	0.0228	0	-	0.989918	6.77479	-1.00675	0.314486	0.51552	1.02657	7.03676	1.08367	0.278971	0.430041	2.36256	0.0181493	+-?+++	0.0386379	1	1.12296	1.0491
4059	BCAM	19	45292316	45344678	129	19	54162	13.66	8.75e-43	1.59504e-38	45351516	rs41289512	G	C	1.6384	0.0594	2.24e-167	-	1.00241	6.68905	0.662353	0.508015	0.691107	1.0022	6.68905	0.537015	0.591468	0.727145	1.85853	0.0630933	?-?+++	0.111338	1	1.10999	1.04422
5971	RELB	19	45484707	45561456	115	20	54162	8.7935	7.25e-19	1.3216e-14	45483438	rs8111069	C	A	0.1145	0.0162	1.625e-12	+	1.07808	7.56269	5.55443	4.29016e-08	6.63823e-07	1.07534	7.56269	4.77048	2.34157e-06	1.79169e-05	0.454233	0.649661	?-?++-	0.735849	1	0.970613	1.00072
602	BCL3	19	45226070	45283301	141	18	54162	8.3989	2.25e-17	4.10153e-13	45297928	rs2889414	G	A	0.4276	0.031	2.492e-43	-	1.07323	8.87226	2.95216	0.00328645	0.0141125	1.0749	8.87226	2.68242	0.0075227	0.022495	5.9533	2.62797e-09	++?+++	6.61349e-08	6.18361e-05	1.56183	1.26608	0.6139	0.4449
388551	CEACAM16	19	45182421	45233986	171	31	54162	7.997	6.37e-16	1.16119e-11	45249661	rs12459810	T	C	0.3269	0.0238	6.774e-43	-
346	APOC4	19	45425495	45468753	102	8	54162	7.5419	2.32e-14	4.22913e-10	45406673	rs10119	A	G	0.822	0.0208	0	+
1209	CLPTM1	19	45437842	45516604	198	15	54162	7.385	7.62e-14	1.38905e-09	45418790	rs5117	C	T	1.2736	0.0302	0	+	1.08208	8.61813	4.47398	9.28444e-06	8.20811e-05	1.1511	8.61813	7.09484	3.88783e-12	1.25136e-10	0.086909	0.930744	--+++-	0.952534	1	0.799386	0.959856
90332	EXOC3L2	19	45695879	45757469	148	16	54162	7.2769	1.71e-13	3.11716e-09	45685068	rs78979751	C	T	0.269	0.0311	5.555e-18	+	1.00158	6.70083	0.438951	0.660865	0.80399	1.00194	6.70083	0.478878	0.63221	0.759908	1.59322	0.111111	-+?+++	0.179207	1	0.861682	0.99717
344	APOC2	19	45429239	45472822	105	7	54162	7.1095	5.82e-13	1.06093e-08	45410002	rs769449	A	G	1.2585	0.0257	0	+
1191	CLU	8	27434434	27492328	148	25	54162	7.0113	1.18e-12	2.15102e-08	27430506	rs7831810	G	A	0.083	0.0155	9.331e-08	+	1.00034	6.67535	0.0992248	0.920995	0.957868	1.00132	6.67535	0.337641	0.735759	0.833189	6.22713	4.75064e-10	++?++-	1.66096e-08	1.11783e-05	1.60508	1.30969	0.6209	0.4616		Yes
79090	TRAPPC6A	19	45646186	45701501	94	15	54162	6.9192	2.27e-12	4.13798e-08	45631816	rs17643262	A	G	0.251	0.0266	3.573e-21	+	0.99039	7.6988	-0.810806	0.417818	0.614998	1.01388	7.6988	1.02895	0.303941	0.458076	-4.93251	8.11785e-07	-----+	7.04845e-06	0.0191013	0.87335	0.925718			Yes
2041	EPHA1	7	143068205	143125985	125	29	54162	6.8652	3.32e-12	6.05203e-08	143126796	rs10237465	G	A	0.0928	0.0167	3.024e-08	-	1.011	7.13199	0.905603	0.365531	0.565755	1.02841	7.13199	2.06265	0.0396018	0.09191	1.35393	0.175758	???++-	0.261895	1	1.03148	1.00646			Yes	Yes
284353	NKPD1	19	45633008	45683408	73	10	54162	6.7946	5.43e-12	9.89835e-08	45631816	rs17643262	A	G	0.251	0.0266	3.573e-21	+
643680	MS4A4E	11	59948726	60030575	206	16	54162	6.455	5.41e-11	9.86189e-07	60039917	rs2162254	T	A	-0.1094	0.016	7.833e-12	-
8301	PICALM	11	85648214	85800923	396	23	54162	6.4447	5.79e-11	1.05546e-06	85820077	rs543293	A	G	-0.1257	0.0165	2.409e-14	-	1.00821	6.97122	0.943878	0.345635	0.545366	0.934224	9.84304	-2.74799	0.0061874	0.0190425	-1.21817	0.223159	-+?--+	0.31905	1	0.828737	0.953805				Yes
11129	CLASRP	19	45522298	45594214	111	12	54162	6.4171	6.94e-11	1.26509e-06	45612226	rs12462040	T	C	0.2615	0.0277	3.653e-21	-	1.01159	7.00964	1.41353	0.15805	0.32098	1.00396	7.00964	0.430383	0.667081	0.784956	3.23155	0.00123122	++?+++	0.00375886	1	1.69315	1.18189
388552	BLOC1S3	19	45662003	45705058	70	12	54162	6.3925	8.16e-11	1.48749e-06	45651237	rs113321260	A	G	0.2726	0.0286	1.349e-21	+
284352	PPP1R37	19	45576431	45670543	216	17	54162	6.3514	1.07e-10	1.9505e-06	45673701	rs28367893	A	G	0.2666	0.0299	4.418e-19	-
64231	MS4A6A	11	59919080	59972139	102	9	54162	6.3364	1.18e-10	2.15102e-06	59982470	rs11603507	A	T	-0.1026	0.0159	1.109e-10	-	0.886904	10.0954	-4.05131	5.80468e-05	0.000415774	0.83131	10.0954	-5.54441	4.52963e-08	5.25363e-07	8.57218	0	++++++	0	0	1.701	1.43322	0.6234	0.5078	Yes	Yes
5817	PVR	19	45127098	45189429	125	18	54162	6.2426	2.15e-10	3.91923e-06	45199524	rs73035597	T	C	0.1777	0.0251	1.376e-12	-	1.00265	6.83922	0.478482	0.632492	0.783788	1.01029	6.83922	1.64802	0.0999027	0.19499	-0.820856	0.411728	--?+-+	0.520355	1	0.886724	0.957373
2206	MS4A2	11	59835734	59885940	131	14	54162	6.1877	3.05e-10	5.55985e-06	59902799	rs61901691	T	C	-0.1022	0.0159	1.445e-10	-	0.988815	6.86926	-1.07008	0.285041	0.482799	0.981614	6.86926	-1.56956	0.117076	0.22172	-0.952278	0.340956	???---	0.448471	1	0.94995	0.975742
51338	MS4A4A	11	60028014	60096445	201	15	54162	6.1555	3.74e-10	6.81765e-06	60103385	rs72924659	T	C	-0.1413	0.0196	5.354e-13	-	0.982972	6.74726	-3.05026	0.00239351	0.0108026	0.969593	6.74726	-4.87545	1.41226e-06	1.13881e-05	6.754	1.43823e-11	++?+++	1.0255e-09	3.38415e-07	1.9223	1.44219			Yes	Yes
10347	ABCA7	19	1020102	1085571	234	37	54162	6.112	4.92e-10	8.96867e-06	1089025	rs75639405	A	G	0.2047	0.0479	1.941e-05	-	1.17126	8.12178	6.80336	2.60793e-11	7.96592e-10	1.18703	8.12178	6.56015	1.21461e-10	2.6819e-09	5.31771	1.0508e-07	++?+++	1.29588e-06	0.00247253	1.2894	1.1253				Yes
1378	CR1	1	207649473	207835110	373	30	54162	5.9821	1.1e-09	2.00519e-05	207850539	rs11118328	C	T	0.1281	0.0204	3.414e-10	-	1.07606	7.39549	4.4331	1.11601e-05	9.70198e-05	1.05476	7.39549	2.86638	0.0043064	0.0138648	2.63059	0.00852362	-+?+++	0.0201124	1	1.08582	1.02831				Yes
23624	CBLC	19	45261126	45323903	118	11	54162	5.9257	1.55e-09	2.82549e-05	45324138	rs28399637	A	G	0.417	0.0237	4.663e-69	-
274	BIN1	2	127785599	127884903	348	29	54162	5.9188	1.62e-09	2.9531e-05	127891427	rs4663105	C	A	0.1837	0.0172	1.001e-26	-	1.04231	9.18901	2.09236	0.0368516	0.105843	1.10529	9.60418	4.19683	3.14259e-05	0.000181182	-0.311943	0.755084	--?-++	0.821983	1	0.77453	0.960584			Yes	Yes
147710	IGSF23	19	45096911	45160081	155	23	54162	5.9124	1.69e-09	3.0807e-05	45165912	rs714948	A	C	0.1877	0.0261	6.256e-13	-
338398	TAS2R60	7	143120546	143161502	76	14	54162	5.7817	3.7e-09	6.74473e-05	143108841	rs11763230	T	C	-0.135	0.0201	2.111e-11	+
79760	GEMIN7	19	45559024	45614782	138	12	54162	5.7658	4.06e-09	7.40097e-05	45631816	rs17643262	A	G	0.251	0.0266	3.573e-21	-	0.991903	6.74381	-1.70813	0.0881613	0.208675	0.995282	6.74381	-0.883345	0.377425	0.533824	-3.74499	0.000180401	--?---	0.000716429	1	0.680722	0.872963
1839	HBEGF	5	139692428	139746188	77	14	54162	5.7152	5.48e-09	9.98949e-05	139691664	rs2337138	C	A	0.0667	0.0155	1.571e-05	+	1.00021	6.7945	0.0373026	0.970257	0.985132	1.00412	6.7945	0.65726	0.511281	0.6602	2.64636	0.00813631	++++++	0.0193127	1	1.10349	1.06576
7791	ZYX	7	143058338	143108204	100	25	54162	5.5562	1.38e-08	0.00025156	143108841	rs11763230	T	C	-0.135	0.0201	2.111e-11	-	1.13324	10.9497	4.8788	1.38949e-06	1.50712e-05	1.18295	10.0556	5.70328	1.89513e-08	2.41735e-07	0.01445	0.988471	+-?--+	0.992139	1	1.15835	1.02776
23526	HMHA1	19	1045922	1106627	221	39	54162	5.5305	1.6e-08	0.000291664	1043864	rs4622634	C	G	-0.1145	0.0224	3.283e-07	+	1.09315	8.72397	5.18883	2.9534e-07	3.76513e-06	1.13983	8.72397	6.77865	3.05554e-11	7.8655e-10	6.7278	1.72253e-11	++?+++	1.17482e-09	4.05312e-07	1.39854	1.19887	0.6489	0.5032
56971	CEACAM19	19	45154724	45207631	117	23	54162	5.5233	1.66e-08	0.000302601	45225973	rs2927487	G	C	0.224	0.0226	4.227e-23	-	1.00934	6.77345	1.94517	0.0522496	0.139182	1.00453	6.77345	0.840973	0.400718	0.55779	2.6476	0.00810649	???+++	0.0192478	1	1.12044	1.06713
1379	CR1L	1	207798458	207917036	420	24	54162	5.463	2.34e-08	0.000426559	207786828	rs2093760	A	G	0.1474	0.0191	1.163e-14	+
162979	ZNF296	19	45554758	45599688	98	10	54162	5.4405	2.66e-08	0.000484891	45612226	rs12462040	T	C	0.2615	0.0277	3.653e-21	-	1.03859	7.91895	2.54018	0.0113456	0.0403471	1.10047	7.91895	5.70989	1.82686e-08	2.34209e-07	-0.529808	0.596245	???-++	0.690266	1	0.966243	1.00106
23403	FBXO46	19	46193887	46254151	82	17	54162	5.3178	5.25e-08	0.000957023	46267453	rs16980013	T	G	0.0772	0.0168	4.001e-06	-	1.04768	7.21975	5.09577	4.74096e-07	5.69316e-06	1.07749	8.03045	5.53662	4.72488e-08	5.47452e-07	1.7345	0.0828297	++?+++	0.139742	1	1.15374	1.04938		0.4473
6653	SORL1	11	121302912	121524471	354	49	54162	5.2688	6.87e-08	0.00125233	121532050	rs747590	A	G	0.221	0.0776	0.004391	-	1.20862	10.8735	6.17199	1.28647e-09	2.79607e-08	1.31229	10.8735	7.87028	1.80981e-14	1.02194e-12	-2.97472	0.00293259	-++---	0.00800669	1	0.615497	0.894912				Yes
6688	SPI1	11	47356409	47420127	127	15	54162	5.154	1.28e-07	0.00233331	47432637	rs9381563	C	T	0.0968	0.0166	5.3e-09	-	1.13336	10.1967	4.66575	3.84193e-06	3.71713e-05	1.12503	10.1967	3.90358	0.000106202	0.000541746	3.85944	0.000113649	???+++	0.00048062	1	1.09876	1.08544
3122	HLA-DRA	6	32387619	32432823	722	24	54162	5.143	1.35e-07	0.00246092	32452517	rs113996760	T	C	0.1194	0.0223	8.724e-08	-	0.947559	12.0831	-2.2598	0.024213	0.0754789	0.901606	12.4918	-3.6218	0.000318848	0.00143308	6.93568	4.04277e-12	?+?++-	3.70141e-10	9.51263e-08	1.80029	1.39985		0.4428
3123	HLA-DRB1	6	32526546	32577613	1550	19	54162	5.117	1.55e-07	0.00282549	32521785	rs72844190	T	G	0.1388	0.0235	3.759e-09	+	0.9331	8.21785	-0.681861	0.495606	0.680603	1.07972	8.21785	0.671468	0.502197	0.652017	5.33514	9.5469e-08	???++?	1.20256e-06	0.00224639	1.53177	1.40876				Yes
1265	CNN2	19	1006274	1059064	203	31	54162	5.1136	1.58e-07	0.00288018	1063443	rs4147929	A	G	0.1348	0.0224	1.701e-09	-	1.02701	10.7396	1.03291	0.302086	0.501844	1.06377	10.7396	2.13015	0.0335901	0.0803086	5.30251	1.14221e-07	+?++++	1.38252e-06	0.00268761	1.51661	1.23208	0.6076	0.4937
245802	MS4A6E	11	60082355	60128441	200	10	54162	5.0995	1.7e-07	0.00309893	60076940	rs11824773	C	G	-0.1107	0.0159	3.72e-12	+
1135	CHRNA2	8	27297278	27356813	191	27	54162	5.0713	1.98e-07	0.00360934	27296004	rs5000605	G	A	0.0634	0.0155	4.05e-05	+	1.02741	7.14174	1.71055	0.0877117	0.207855	1.0608	7.14174	3.31901	0.000961439	0.00374248	1.06309	0.28774	???++-	0.392153	1	0.959122	0.996795
92154	MTSS1L	16	70675107	70739954	172	24	54162	5.0645	2.05e-07	0.00373695	70756181	rs62047970	G	T	-0.0682	0.0174	8.683e-05	-
399888	FAM180B	11	47588230	47630746	35	8	54162	4.9983	2.89e-07	0.00526818	47576367	rs13212790	C	T	0.0918	0.0172	8.907e-08	+	0.995919	6.76856	-0.995706	0.319819	0.520847	1.00247	6.76856	0.534841	0.59297	0.72844	0.672714	0.501129	?????+	0.605845	1	1.02966	1.02966
114971	PTPMT1	11	47566888	47615013	43	9	54162	4.9876	3.06e-07	0.00557807	47556630	rs1485780	C	A	0.0948	0.0174	4.931e-08	+
4722	NDUFS3	11	47580562	47626115	41	9	54162	4.9371	3.96e-07	0.00721868	47562915	rs6903331	G	A	0.093	0.0172	6.358e-08	+	0.90186	8.73433	-6.81653	2.39634e-11	7.37675e-10	0.899502	8.73433	-6.21372	1.00389e-09	1.78194e-08	-5.00354	5.62879e-07	------	5.2185e-06	0.0132445	0.575167	0.856275	-0.6712	-0.5347
388553	BHMG1	19	46216515	46287376	76	8	54162	4.9363	3.98e-07	0.00725514	46291672	rs55681266	A	C	0.0827	0.0168	8.532e-07	-
55709	KBTBD4	11	47573749	47620567	37	10	54162	4.9235	4.25e-07	0.00774733	47556630	rs1485780	C	A	0.0948	0.0174	4.931e-08	+	1.01686	7.46421	2.18961	0.0289604	0.0870913	1.02148	7.46421	2.47539	0.0136009	0.0374373	-4.80544	1.54414e-06	------	1.22089e-05	0.0363337	0.662826	0.876591	-0.5981	-0.4623
945	CD33	19	51708335	51763274	119	18	54162	4.9237	4.25e-07	0.00774733	51771322	rs140829879	G	T	0.3535	0.0929	0.0001428	-	1.04269	8.5348	2.38154	0.01757	0.0582001	1.0348	8.5348	1.73267	0.0837	0.169139	6.59932	4.1305e-11	??++++	2.34194e-09	9.71906e-07	1.42818	1.21694				Yes
1762	DMWD	19	46266205	46316060	89	13	54162	4.8841	5.19e-07	0.00946085	46251768	rs4802274	G	A	0.0812	0.0167	1.155e-06	+	1.04624	7.09256	4.31051	1.9212e-05	0.000156474	1.065	7.09256	5.33848	1.3589e-07	1.39987e-06	-1.4053	0.159932	--?+--	0.242396	1	0.883204	0.955187
2185	PTK2B	8	27148999	27336908	486	31	54162	4.873	5.49e-07	0.0100077	27337045	rs35505579	T	A	-0.1092	0.0289	0.0001546	-	1.06072	7.98827	3.5741	0.00038144	0.00218586	1.03423	7.98827	1.81451	0.0701287	0.146915	0.376758	0.706353	--?+++	0.78406	1	0.87033	0.991727	-0.4684	-0.4138	Yes	Yes
23788	MTCH2	11	47618858	47684206	71	11	54162	4.8692	5.6e-07	0.0102082	47606029	rs9357551	T	C	0.089	0.0183	1.151e-06	+	0.99542	6.85677	-0.717252	0.473515	0.662851	0.995871	6.85677	-0.574662	0.565749	0.707139	-4.00403	6.22725e-05	--+---	0.000286971	1	0.539695	0.855523
55697	VAC14	16	70701342	70855074	274	27	54162	4.783	8.64e-07	0.0157499	70697414	rs78335918	G	T	0.1324	0.03	1.01e-05	+	1.03916	7.19187	4.47891	9.0797e-06	8.06342e-05	1.0618	7.19187	6.2162	9.89144e-10	1.75714e-08	2.41107	0.0159059	?-?++-	0.0344596	1	0.909265	0.985498
1760	DMPK	19	46252975	46305815	73	9	54162	4.7143	1.21e-06	0.0220571	46234155	rs17878252	A	G	0.0964	0.0179	7.867e-08	+	1.00231	6.72822	0.609492	0.542443	0.719056	1.01123	6.72822	2.62538	0.00888938	0.0259775	3.18074	0.00146901	++?+++	0.00437486	1	1.24472	1.09196
23607	CD2AP	6	47425482	47614999	451	16	54162	4.7008	1.3e-06	0.0236977	47421188	rs7774615	A	G	-0.0747	0.0158	2.161e-06	+	0.986722	6.83669	-2.04599	0.0412189	0.1155	0.973879	6.83669	-3.60178	0.000343842	0.00152911	6.72679	1.7345e-11	++?+++	1.17956e-09	4.08128e-07	1.28237	1.15485	0.6768	0.5707		Yes
3117	HLA-DQA1	6	32585169	32632152	2022	25	54162	4.6959	1.33e-06	0.0242446	32572229	rs75129605	A	G	0.1176	0.0203	6.265e-09	+	0.922055	9.65387	-1.94268	0.052551	0.139822	0.97585	9.65387	-0.52028	0.603072	0.736714	3.25374	0.00113895	?+?++?	0.00351147	1	1.35376	1.20116
932	MS4A3	11	59804101	59858588	142	17	54162	4.6922	1.35e-06	0.0246091	59867379	rs17528859	C	T	-0.1001	0.0158	2.577e-10	-	0.907769	7.28531	-3.70401	0.000233023	0.00141836	0.883059	7.28531	-4.23214	2.70037e-05	0.000158433	-3.61342	0.00030219	???---	0.00111977	1	0.930227	0.95585
147912	SIX5	19	46248043	46292497	60	7	54162	4.691	1.36e-06	0.0247914	46234155	rs17878252	A	G	0.0964	0.0179	7.867e-08	+	0.998705	6.72264	-0.368768	0.712439	0.838189	1.00662	6.72264	1.66836	0.0957984	0.18845	5.76549	8.14197e-09	??++++	1.62082e-07	0.000191581	1.54137	1.26547	0.6667	0.5546
114900	C1QTNF4	11	47591216	47635961	38	9	54162	4.6639	1.55e-06	0.028255	47590104	rs2171086	T	C	0.0941	0.0173	4.967e-08	+
23360	FNBP4	11	47718055	47809012	140	13	54162	4.6459	1.69e-06	0.030807	47699883	rs10128705	C	T	-0.078	0.0174	7.709e-06	+	0.982849	9.06301	-0.876935	0.380894	0.580668	0.9637	9.06301	-1.66635	0.0961973	0.189038	-0.521438	0.602062	-+--++	0.695065	1	0.901459	1.00071
56244	BTNL2	6	32342513	32394900	613	26	54162	4.6214	1.91e-06	0.0348174	32395036	rs114684261	C	T	0.0983	0.0183	8.127e-08	-
28955	DEXI	16	11002748	11056257	138	29	54162	4.5825	2.3e-06	0.0419267	11064617	rs7203209	T	G	0.0756	0.0167	5.752e-06	-	0.996438	7.90987	-0.278732	0.780552	0.878266	1.02467	7.90987	1.69251	0.0910994	0.180769	1.28016	0.200489	-++++-	0.291925	1	1.29823	1.03279
79841	AGBL2	11	47661143	47756928	128	12	54162	4.5527	2.65e-06	0.0483068	47648042	rs4752856	A	G	-0.0758	0.0168	6.817e-06	+
